# Supplementary material for: Continuous infiltration and evolutionary trajectory of nuclear organelle DNA inOryza
Source: HighWire-hosted journal article supplement (doi:10.1101/gr.279609.124), 2025-04-25
Supplement: Supplemental_Fig_S4.pdf [file Supplemental_Fig_S4.pdf]

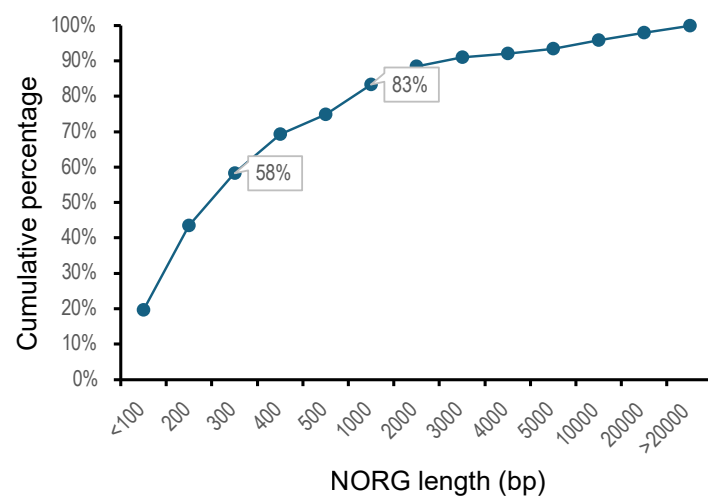

**Supplemental Fig. 4. Cumulative frequency plot of the NORG length range.** The line plot shows the cumulative frequency as a percentage of the total ONG number fall at or below each length range on the X-axis.
