# Supplementary material for: Continuous infiltration and evolutionary trajectory of nuclear organelle DNA inOryza
Source: HighWire-hosted journal article supplement (doi:10.1101/gr.279609.124), 2025-04-25
Supplement: Supplemental_Fig_S7.pdf [file Supplemental_Fig_S7.pdf]

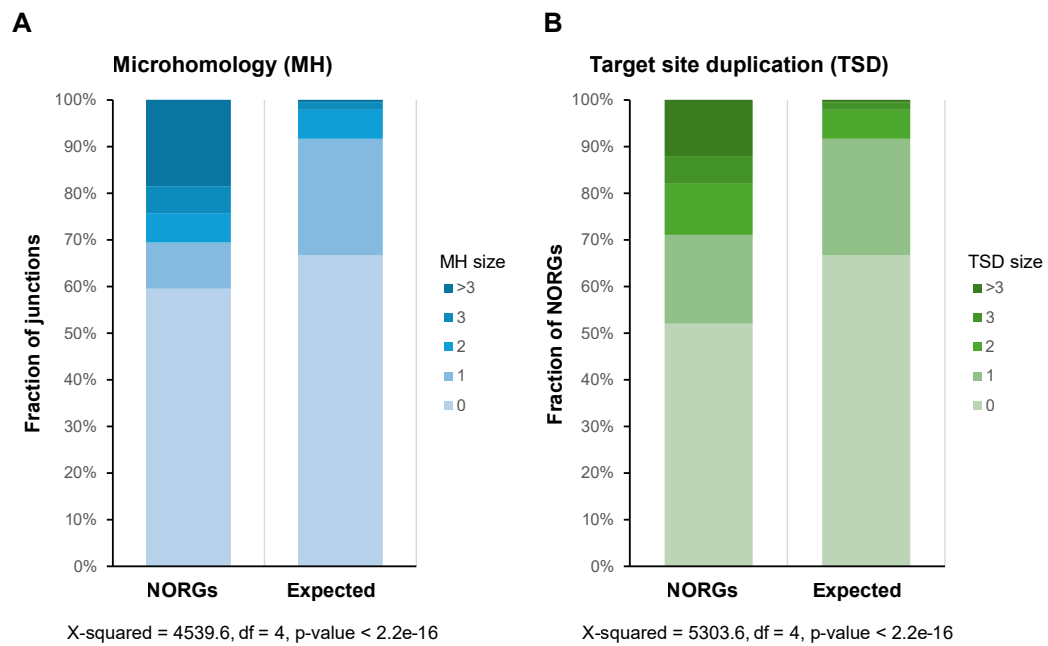

**Supplemental Fig. 7 The statistics of microhomology (MH) and target site duplications (TSDs) in the NORG junctions.** Fraction of NORGs associated with the indicated both (A) TSD and (B) MH sizes significantly enriched in NORG junctions.
