# Supplementary material for: Continuous infiltration and evolutionary trajectory of nuclear organelle DNA inOryza
Source: HighWire-hosted journal article supplement (doi:10.1101/gr.279609.124), 2025-04-25
Supplement: Supplemental_Fig_S8.pdf [file Supplemental_Fig_S8.pdf]

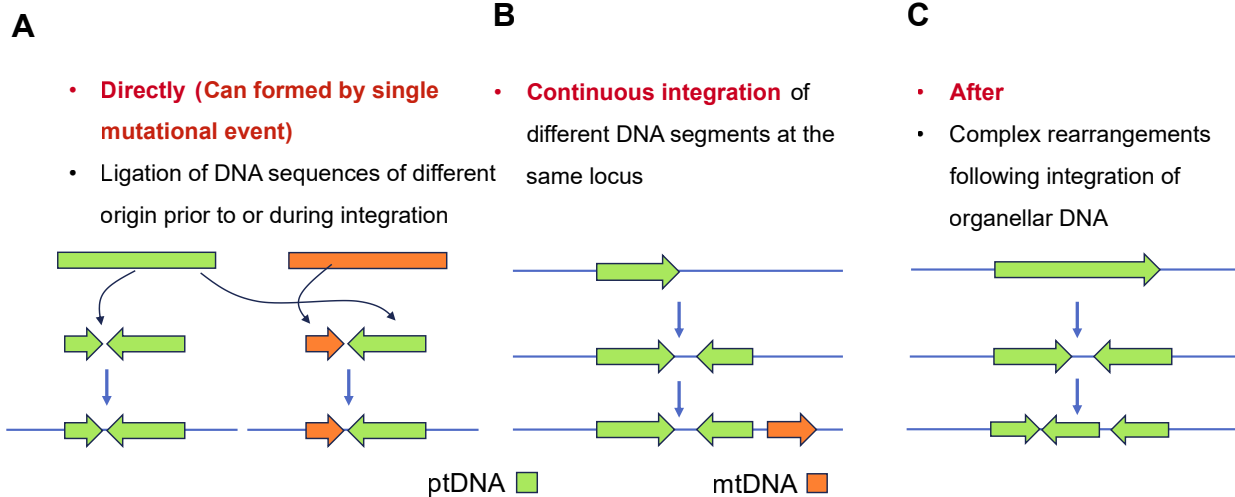

**Supplemental Fig. 8 Three hypotheses for the formation of complex NORGs. (A)** Single mutational events involving the ligation of DNA from different sources during or before organelle DNA insertion. **(B)** Sequential insertions of different DNAs at the same locus. **(C)** Complex rearrangements after organelle DNA insertion.
