# Supplementary material for: Continuous infiltration and evolutionary trajectory of nuclear organelle DNA inOryza
Source: HighWire-hosted journal article supplement (doi:10.1101/gr.279609.124), 2025-04-25
Supplement: Supplemental_Fig_S11.pdf [file Supplemental_Fig_S11.pdf]

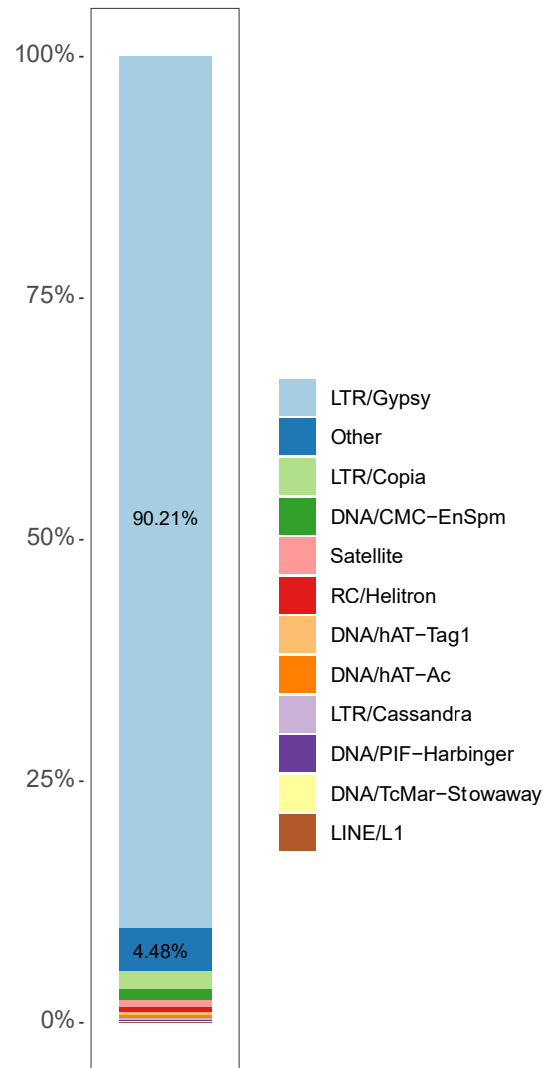

**Supplemental Fig. 11 The type of sequence insertions in NORGs.** The insertion sequences within the NORGs were determined by the co-linearity among accessions.
