# Supplementary material for: Continuous infiltration and evolutionary trajectory of nuclear organelle DNA inOryza
Source: HighWire-hosted journal article supplement (doi:10.1101/gr.279609.124), 2025-04-25
Supplement: Supplemental_Table_S1.xlsx [file Supplemental_Table_S1.xlsx]

## Sheet: Supplementary Table 1
Supplemental Table 1. Orthologous NORG groups in AA genomes of Oryza.
The table lists locations of orghologous NORG groups (ONGs) in AA genomes of Oryza, and 28 conserved ONGs present in O. punctata (BB genome). "0" means not present in the genome.
ONG ID	O. sativa																O. glaberrima	O. barthii	O. glumaepatula	O. meridionalis	O. punctata
	LIMA	KHAO YAI GUANG	LIU XU	LARHA MUGAD	Minghui 63	PR 106	IR 64	Zhenshan 97	GOBOL SAIL	N22	NATEL BORO	Azucena	KETAN NANGKA	Nipponbare	CHAO MEO	ARC 10497
	Os127564RS1	Os127518RS1	Os125827RS1	Os125619RS1	MH63RS3	Os127742RS1	OsIR64RS1	ZS97RS3	Os132424RS1	OsN22RS2	Os127652RS1	AzucenaRS1	Os128077RS1	IRGSP1.0	Os132278RS1	Os117425RS1	OglaRS2	ObarRS3	OgluRS3	OmerRS3	OpunRS2
ONG0100010	Chr1:240056-240192	Chr1:246158-246294	Chr1:224075-224211	Chr1:231428-231564	Chr1:237537-237676	Chr1:239302-239438	Chr1:225786-225922	Chr1:249960-250096	Chr1:236280-236416	Chr1:247848-247984	Chr1:238078-238214	Chr1:232378-232514	Chr1:286565-286701	Chr1:248007-248143	Chr1:267890-268026	Chr1:283979-284115	Chr1:215693-215829	Chr1:215611-215747	Chr1:266510-266649	Chr1:387717-387856
ONG0100020	Chr1:513595-513814	Chr1:527704-527918	Chr1:490441-490660	Chr1:526045-526264	Chr1:519068-519282	Chr1:535014-535228	Chr1:520551-520770	Chr1:542832-543051	Chr1:517643-517857	Chr1:500704-500918	Chr1:486079-486293	Chr1:513698-513912	Chr1:568037-568251	Chr1:528750-528964	Chr1:556275-556489	Chr1:565390-565604	Chr1:464843-465062	Chr1:464708-464927	0	0
ONG0100030	Chr1:1846052-1846619	Chr1:1934827-1935328	Chr1:1964014-1964515,WGGU01000022.1:108382-108949	Chr1:1912513-1913080	Chr1:2002405-2002972	Chr1:2018285-2018852	Chr1:1920569-1921070	Chr1:1913430-1913997	Chr1:1955430-1955931	Chr1:2041996-2042497	Chr1:1994115-1994616	Chr1:1913973-1914474	Chr1:1910606-1911173	Chr1:1990116-1990616	Chr1:2083786-2083955	Chr1:1955759-1956259	Chr1:1710329-1710895	Chr1:1830855-1831423	Chr1:2415457-2415988	Chr1:1826164-1826731
ONG0100040	Chr1:2746437-2746707	Chr1:2777473-2777743	Chr1:2834890-2835184	Chr1:2803894-2804164	Chr1:2846577-2846851	Chr1:2862414-2862708	Chr1:2744351-2744645	Chr1:2781750-2782024	Chr1:2769729-2769999	Chr1:2854097-2854367	Chr1:2786392-2786662	Chr1:2935715-2935985	Chr1:2798504-2798774	Chr1:2803985-2804255	Chr1:3115229-3115499	Chr1:2702074-2702344	0	0	0	0
ONG0100050	0	0	0	0	0	0	0	0	0	Chr1:3106915-3107054	Chr1:3039096-3039235	0	0	Chr1:3076899-3077038	0	Chr1:2941607-2941746	Chr1:2651377-2651516	Chr1:2777977-2778116	0	0
ONG0100060	Chr1:3296009-3296165	Chr1:3380656-3380812	Chr1:3348877-3349033	Chr1:3361576-3361732	Chr1:3366347-3366503	Chr1:3382169-3382325	Chr1:3264105-3264261	Chr1:3288152-3288308	Chr1:3320612-3320768	Chr1:3409967-3410123	Chr1:3342089-3342245	Chr1:3517087-3517243	Chr1:3304476-3304632	Chr1:3382693-3382849	Chr1:3696569-3696725	Chr1:3243379-3243535	Chr1:2925821-2925977	0	0	Chr1:3114360-3114516
ONG0100070	Chr1:3308425-3308659	Chr1:3393070-3393304	Chr1:3361281-3361515	Chr1:3373935-3374091	Chr1:3378759-3378993	Chr1:3394583-3394817	Chr1:3276519-3276753	Chr1:3300970-3301204	Chr1:3333023-3333257	Chr1:3421975-3422210	Chr1:3354095-3354330	Chr1:3529086-3529321	Chr1:3316489-3316724	Chr1:3394730-3394965	Chr1:3709382-3709617	Chr1:3255505-3255740	0	0	0	Chr1:3126785-3127020
ONG0100080	Chr1:3482733-3482878	Chr1:3567329-3567474	Chr1:3531488-3531633	Chr1:3555729-3555874	Chr1:3553061-3553206	Chr1:3568876-3569021	Chr1:3450614-3450759	Chr1:3479058-3479203	Chr1:3502247-3502392	Chr1:3592057-3592202	Chr1:3523612-3523757	Chr1:3699401-3699546	Chr1:3486760-3486905	Chr1:3565079-3565224	Chr1:3900731-3900876	Chr1:3425405-3425550	Chr1:3099169-3099314	Chr1:3236659-3236804	Chr1:4100019-4100164	Chr1:3298578-3298723	Chr1:3113944-3114087
ONG0100090	Chr1:3627179-3627484	Chr1:3711807-3712112	Chr1:3675383-3675683	Chr1:3697733-3698038	Chr1:3697552-3697857	Chr1:3713354-3713659	Chr1:3595086-3595391	Chr1:3613711-3614016	Chr1:3646630-3646935	Chr1:3726186-3726491	Chr1:3657752-3658057	Chr1:3838944-3839249	Chr1:3626295-3626600	Chr1:3701710-3702015	Chr1:4032565-4032870	Chr1:3564930-3565235	Chr1:3245550-3245855	Chr1:3383330-3383635	Chr1:4233075-4233380	Chr1:3443760-3444065	Chr1:3242266-3242817
ONG0100100	0	0	0	0	0	0	0	0	0	0	0	Chr1:4014357-4014428	Chr1:3801507-3801578	Chr1:3874933-3875004	0	Chr1:3740131-3740202	0	0	Chr1:4430555-4430626	0
ONG0100110	0	0	0	0	0	0	0	0	0	0	0	Chr1:4242542-4243151	Chr1:4034775-4035387	Chr1:4095855-4096467	Chr1:4431119-4431728	Chr1:3968371-3968980	0	0	0	0
ONG0100120	Chr1:4188089-4188250	Chr1:4272510-4272671	Chr1:4235937-4236097	Chr1:4258040-4258201	Chr1:4258158-4258319	Chr1:4274073-4274234	Chr1:4155745-4155906	Chr1:4186463-4186624	Chr1:4207508-4207669	Chr1:4272136-4272297	Chr1:4214406-4214567	Chr1:4416247-4416408	Chr1:4214095-4214256	Chr1:4274702-4274863	Chr1:4604928-4605089	Chr1:4142504-4142665	Chr1:3783200-3783361	Chr1:3919078-3919239	0	Chr1:4073771-4073933
ONG0100130	Chr1:4587101-4587314	Chr1:4671158-4671371	Chr1:4630238-4630451	Chr1:4656277-4656490	Chr1:4657224-4657437	Chr1:4673075-4673288	Chr1:4554310-4554523	Chr1:4582089-4582302	Chr1:4606172-4606385	Chr1:4658892-4659107	Chr1:4621172-4621385	Chr1:4914228-4914444	Chr1:4688330-4688546	Chr1:4727550-4727766	Chr1:5094103-5094319	Chr1:4551565-4551778	Chr1:4201329-4201545	Chr1:4337597-4337813	Chr1:5268393-5268609	0
ONG0100140	Chr1:4837765-4838829	Chr1:4921734-4922799	Chr1:4901765-4902829	Chr1:4907951-4909016	Chr1:4907842-4908906	Chr1:4923704-4924768	Chr1:4829721-4830786	Chr1:4853973-4855037	Chr1:4856674-4857738	Chr1:4934107-4935160	Chr1:4869500-4870565	Chr1:5199480-5200543	Chr1:4973404-4974467	Chr1:5005574-5006637	Chr1:5372205-5373270	Chr1:4800493-4801558	Chr1:4410126-4411190	Chr1:4551047-4552112	Chr1:5469860-5470924	0
ONG0100150	Chr1:5032881-5033132	Chr1:5116792-5117042	Chr1:5102476-5102726	Chr1:5102816-5103066	Chr1:5103015-5103265	Chr1:5118885-5119135	Chr1:5015361-5015611	Chr1:5048956-5049206	Chr1:5051583-5051833	Chr1:5131669-5131919	Chr1:5064374-5064624	Chr1:5366712-5366962	Chr1:5167294-5167544	Chr1:5184177-5186247	Chr1:5560797-5561047	Chr1:5038174-5038424	0	0	0	Chr1:4837539-4837775
ONG0100160	Chr1:5415517-5415892	Chr1:5510068-5510443	Chr1:5465167-5465542	Chr1:5496248-5496623	Chr1:5492702-5493077	Chr1:5512267-5512642	Chr1:5381699-5382075	Chr1:5434027-5434403	Chr1:5434007-5434382	Chr1:5501680-5502057	Chr1:5439617-5439992	Chr1:5735342-5735718	Chr1:5537257-5537633	Chr1:5548654-5549030	Chr1:5930383-5930759	Chr1:5406679-5407055	Chr1:4927260-4927601	Chr1:5075477-5075818	Chr1:6044573-6044951	0
ONG0100170	Chr1:5607968-5608121	Chr1:5702253-5702406	Chr1:5657457-5657610	Chr1:5692581-5692734	Chr1:5685188-5685341	Chr1:5708505-5708658	Chr1:5563694-5563847	Chr1:5615607-5615760	Chr1:5626270-5626423	Chr1:5682652-5682805	Chr1:5631024-5631177	Chr1:5916107-5916260	Chr1:5718376-5718529	Chr1:5729735-5729888	Chr1:6111412-6111565	Chr1:5568522-5568675	Chr1:5101284-5101437	Chr1:5249438-5249591	Chr1:6222028-6222181	0
ONG0100180	Chr1:5613963-5614049	Chr1:5708255-5708341	Chr1:5663460-5663547	Chr1:5698577-5698631	Chr1:5688838-5688925	Chr1:5714503-5714557	Chr1:5569705-5569792	Chr1:5621611-5621698	Chr1:5632265-5632351	Chr1:5688659-5688746	Chr1:5637035-5637122	Chr1:5922095-5922181	Chr1:5724367-5724453	Chr1:5735724-5735810	Chr1:6117402-6117488	Chr1:5574513-5574599	Chr1:5107274-5107360	Chr1:5255430-5255516	0	0
ONG0100190	Chr1:7066285-7066938	Chr1:7020783-7021436	Chr1:6840736-6841389	Chr1:6864447-6865096	Chr1:6968723-6969372	Chr1:6913551-6914204	Chr1:6771925-6772577	Chr1:6766364-6767017	Chr1:6912603-6913256	Chr1:6916278-6916930	Chr1:6862528-6863180	Chr1:7062784-7063437	Chr1:6870187-6870840	Chr1:6870308-6870961	Chr1:7333279-7333932	Chr1:6744399-6745051	Chr1:6198114-6198767	Chr1:6332429-6333082	Chr1:7572295-7572948	Chr1:6529209-6529862
ONG0100200	Chr1:6653835-6654919	Chr1:7416804-7417878	Chr1:7256578-7257662	Chr1:7274757-7275844	Chr1:7364462-7365536	Chr1:7296443-7297517	Chr1:7159216-7160290	Chr1:7162552-7163626	Chr1:7308766-7309840	Chr1:7280350-7281437	Chr1:7226729-7227816	Chr1:7493710-7494797	Chr1:7304976-7306063	Chr1:7228880-7229967	Chr1:7691964-7693051	Chr1:7108412-7109499	Chr1:6557487-6558569	Chr1:6691377-6692459	Chr1:7946513-7947600	Chr1:6937587-6938667
ONG0100210	Chr1:6572802-6573226	Chr1:7492868-7493311	Chr1:7338343-7338767	Chr1:7350831-7351274	Chr1:7445527-7445970	Chr1:7372499-7372942	Chr1:7235276-7235719	Chr1:7238460-7238903	Chr1:7384654-7385097	Chr1:7356519-7356962	Chr1:7302912-7303355	Chr1:7569352-7569797	Chr1:7380513-7380958	Chr1:7304373-7304818	Chr1:7767576-7768021	Chr1:7184309-7184754	Chr1:6628169-6628613	Chr1:6764575-6765019	Chr1:8016429-8016872	Chr1:7012190-7012632
ONG0100220	0	0	0	0	0	0	0	0	0	0	0	0	0	Chr1:7761727-7764448	0	0	0	0	0	0
ONG0100230	Chr1:5926579-5927055	Chr1:8146472-8146948	Chr1:7978196-7978672	Chr1:7948735-7949212	Chr1:8098765-8099241	Chr1:8025714-8026190	Chr1:7888309-7888785	Chr1:7891616-7892092	Chr1:8020130-8020607	Chr1:7953655-7954132	Chr1:7900561-7901038	Chr1:8185160-8185636	Chr1:8002896-8003372	Chr1:7917372-7917848	Chr1:8376928-8377404	Chr1:7801822-7802298	Chr1:7271891-7272347	Chr1:7414004-7414460	Chr1:8676410-8676886	0
ONG0100240	Chr1:8310635-8310805	Chr1:8391442-8391612	Chr1:8222828-8222998	Chr1:8204137-8204307	Chr1:8343478-8343648	Chr1:8270414-8270584	Chr1:8133147-8133317	Chr1:8136301-8136772	Chr1:8259232-8259402	Chr1:8205357-8205527	Chr1:8151964-8152134	Chr1:8429992-8430162	Chr1:8249076-8249246	Chr1:8161946-8162116	Chr1:8621625-8621795	Chr1:8046639-8046809	Chr1:7498993-7499163	Chr1:7640283-7640453	Chr1:8992623-8992793	0
ONG0100250	Chr1:8462831-8462980	Chr1:8543587-8543736	Chr1:8375003-8375152	0	Chr1:8495651-8495800	Chr1:8421761-8421910	Chr1:8285316-8285465	Chr1:8288476-8288625	Chr1:8405721-8405870	0	0	Chr1:8582154-8582303	Chr1:8395250-8395399	Chr1:8314107-8314256	Chr1:8773825-8773974	Chr1:8198802-8198951	Chr1:7639797-7640026	Chr1:7786953-7787182	Chr1:9143440-9143667	0
ONG0100260	Chr1:9015945-9016239	Chr1:9082298-9082592	Chr1:8911068-8911362	Chr1:8887236-8887542	Chr1:9061819-9062003	Chr1:8987890-8988074	Chr1:8805012-8805306	Chr1:8826480-8826774	Chr1:8953160-8953454	Chr1:8888399-8888705	Chr1:8834913-8835219	Chr1:9147199-9147383	Chr1:8955750-8955934	Chr1:8879351-8879535	Chr1:9354970-9355154	Chr1:8769860-8770044	Chr1:8149023-8149329	Chr1:8305962-8306268	Chr1:9716318-9716624	Chr1:8545538-8545635
ONG0100270	Chr1:9648094-9648431	Chr1:9723444-9723781	Chr1:9552068-9552405	Chr1:9507458-9507796	Chr1:9707347-9707684	Chr1:9633519-9633856	Chr1:9437386-9437723	Chr1:9461796-9462133	Chr1:9590131-9590468	Chr1:9498266-9498604	Chr1:9444926-9445264	Chr1:9787963-9788302	Chr1:9601058-9601397	Chr1:9520281-9520620	Chr1:10000193-10000532	Chr1:9417680-9418017	Chr1:8740535-8740874	Chr1:8896168-8896506	Chr1:10386000-10386338	0
ONG0100280	Chr1:10049533-10049674	Chr1:10124772-10124913	Chr1:9953565-9953706	Chr1:9893862-9894003	Chr1:10108791-10108932	Chr1:10047555-10047696	Chr1:9851464-9851605	Chr1:9863332-9863473	Chr1:9997129-9997270	Chr1:9855023-9855164	Chr1:9801245-9801386	Chr1:10149157-10149298	Chr1:9962286-9962427	Chr1:9881481-9881622	Chr1:10361593-10361734	Chr1:9819466-9819607	Chr1:9090462-9090603	Chr1:9246394-9246535	Chr1:10735735-10735876	Chr1:9540633-9540774
ONG0100290	Chr1:11420679-11420850	Chr1:11445644-11445848	Chr1:11285703-11285874	Chr1:11114377-11114548	Chr1:11484245-11484416	Chr1:11392111-11392282	Chr1:11180559-11180763	Chr1:11218530-11218701	Chr1:11427068-11427240	Chr1:11207827-11207998	Chr1:11045200-11045371	Chr1:11468284-11468488	Chr1:11299902-11300106	Chr1:11195248-11195452	Chr1:11676663-11676867	Chr1:11179828-11180032	Chr1:10275894-10276098	Chr1:10436709-10436913	Chr1:12108951-12109155	0
ONG0100300	Chr1:11675769-11676004	Chr1:11693055-11693290	Chr1:11541381-11541616	Chr1:11369963-11370198	Chr1:11739909-11740144	Chr1:11614196-11614431	Chr1:11407204-11407439	Chr1:11474278-11474513	Chr1:11682501-11682736	Chr1:11471136-11471371	Chr1:11313390-11313629	Chr1:11695038-11695273	Chr1:11526191-11526426	Chr1:11422428-11422663	Chr1:11903211-11903446	Chr1:11406462-11406697	Chr1:10487023-10487255	Chr1:10647853-10648085	Chr1:12319741-12319976	0
ONG0100310	Chr1:12677703-12678122	Chr1:12715472-12715891	Chr1:12545200-12545619	Chr1:12373001-12373420	Chr1:12739237-12739656	Chr1:12618019-12618438	Chr1:12417171-12417590	Chr1:12468572-12468991	Chr1:12608159-12608570	Chr1:12463404-12463823	Chr1:12366285-12366704	Chr1:12646160-12646585	Chr1:12524606-12525031	Chr1:12362998-12363423	Chr1:12847574-12847992	Chr1:12405711-12406136	Chr1:11375378-11375662	Chr1:11531182-11531466	Chr1:13385669-13386094	0
ONG0100320	Chr1:12751410-12751511	Chr1:12815808-12815909	Chr1:12618166-12618267	Chr1:12445932-12446033	Chr1:12812945-12813046	Chr1:12691729-12691830	Chr1:12490905-12491006	Chr1:12542281-12542382	Chr1:12678305-12678406	Chr1:12537121-12537222	Chr1:12440033-12440134	Chr1:12703013-12703112	Chr1:12581459-12581558	Chr1:12419849-12419948	Chr1:12921406-12921507	Chr1:12462564-12462663	Chr1:11436049-11436150	Chr1:11582558-11582659	Chr1:13418123-13418224	Chr1:11038723-11038822
ONG0100330	0	0	0	0	0	0	0	0	0	0	0	Chr1:12868305-12868438	Chr1:12746959-12747092	Chr1:12583788-12583921	Chr1:13096054-13096187	Chr1:12624410-12624543	0	0	0	0
ONG0100340	Chr1:13091334-13091400	Chr1:13168136-13168202	Chr1:12978385-12978451	Chr1:12806014-12806080	Chr1:13160064-13160130	Chr1:13038831-13038897	Chr1:12845538-12845604	Chr1:12906123-12906189	Chr1:13019155-13019221	Chr1:12904889-12904955	Chr1:12820531-12820597	Chr1:13114810-13114874	Chr1:13023682-13023748	Chr1:12860142-12860208	Chr1:13361467-13361533	Chr1:12880224-12880290	0	0	Chr1:13963310-13963376	0
ONG0100350	Chr1:13179771-13180167	Chr1:13266425-13268146	Chr1:13076631-13078357	Chr1:12903786-12905501	Chr1:13258347-13260070	Chr1:13137112-13138835	Chr1:12942380-12942776	Chr1:13004439-13006165	Chr1:13117453-13119027	Chr1:12993339-12993735	Chr1:12918807-12920530	Chr1:13204963-13206617	Chr1:13108520-13110153	Chr1:12945398-12947033	Chr1:13446385-13448022	Chr1:12963853-12965560	0	0	0	Chr1:11575815-11576260
ONG0100360	Chr1:14193350-14193652	0	0	0	0	0	Chr1:13983576-13983877	0	0	Chr1:14137383-14137684	Chr1:13985821-13986122	Chr1:14261737-14262039	Chr1:13978476-13978778	Chr1:13814259-13814561	Chr1:14316102-14316404	Chr1:13710666-13710968	0	0	0	Chr1:13747771-13748064
ONG0100370	0	0	0	Chr1:14446298-14449192	0	0	0	0	0	0	0	Chr1:14591105-14593999	Chr1:14301893-14304786	Chr1:14137452-14140345	Chr1:14639891-14642784	Chr1:14041269-14044162	Chr1:13217200-13220078	Chr1:13950887-13953764	Chr1:15709174-15711976	0
ONG0100380	0	0	0	0	0	0	0	0	0	Chr1:15284848-15284938	0	Chr1:15252530-15252620	Chr1:14983923-14984013	Chr1:14832326-14832416	0	0	Chr1:13878901-13878991	Chr1:14624094-14624184	Chr1:16579341-16579431	0
ONG0100390	0	0	0	0	0	0	0	0	0	Chr1:15601479-15601766	0	Chr1:15537060-15537347	Chr1:15300343-15300630	Chr1:15127406-15127693	0	0	0	0	0	0
ONG0100400	0	Chr1:16365485-16365616	Chr1:15770791-15770922	Chr1:16172109-16172240	Chr1:16357867-16357998	Chr1:16177324-16177455	0	0	Chr1:16216002-16216133	Chr1:16283934-16284065	Chr1:15997465-15997596	Chr1:16210788-16210919	Chr1:15967426-15967557	Chr1:15809542-15809673	Chr1:16428758-16428889	Chr1:15793648-15793779	Chr1:14709345-14709477	Chr1:15437707-15437839	Chr1:17800316-17800447	Chr1:15971096-15971227
ONG0100410	Chr1:16344243-16344512	Chr1:16522042-16522311	Chr1:15987398-15987667	Chr1:16388313-16388582	Chr1:16514421-16514690	Chr1:16333875-16334144	Chr1:16237459-16237728	Chr1:16505951-16506220	Chr1:16372560-16372830	Chr1:16396303-16396571	Chr1:16153844-16154113	Chr1:16323186-16323454	Chr1:16079800-16080068	Chr1:15921766-15922083	Chr1:16541178-16541446	Chr1:15906039-15906308	Chr1:14806958-14807228	Chr1:15543692-15543962	0	0
ONG0100420	Chr1:17225828-17226077	Chr1:17412388-17412637	Chr1:16870621-16870870	Chr1:17266060-17266309	Chr1:17406974-17407223	Chr1:17226423-17226672	Chr1:17105125-17105374	Chr1:17380188-17380437	Chr1:17264120-17264369	Chr1:17171518-17171767	Chr1:17045596-17045845	Chr1:17091670-17091919	Chr1:16848571-16848820	Chr1:16695946-16696195	Chr1:17316420-17316669	Chr1:16674673-16674922	Chr1:14443775-14444024	Chr1:15179278-15179527	0	0
ONG0100430	0	0	0	0	0	0	0	0	0	Chr1:17408846-17409250	0	Chr1:17657572-17657976	Chr1:17186637-17187041	Chr1:16994790-16995194	Chr1:18092979-18093383	Chr1:17199535-17199939	0	0	0	0
ONG0100440	Chr1:18625721-18625867	Chr1:18786483-18786707	Chr1:18277290-18277514	Chr1:18669314-18669538	Chr1:18764218-18764442	Chr1:18156780-18157004	Chr1:18784047-18784271	Chr1:18761419-18761565	Chr1:18631401-18631625	Chr1:17816111-17816336	Chr1:18514854-18515078	Chr1:18065934-18066159	Chr1:17592233-17592458	Chr1:17402109-17402334	Chr1:18505009-18505234	Chr1:17610408-17610633	Chr1:16107556-16107780	Chr1:16859004-16859150	Chr1:19941213-19941437	Chr1:17766990-17767216
ONG0100450	Chr1:18632221-18632723	Chr1:18793000-18793501	Chr1:18283792-18284293	Chr1:18675816-18676317	Chr1:18770735-18771236	Chr1:18163297-18163798	Chr1:18790550-18791051	Chr1:18767919-18768421	Chr1:18637918-18638419	Chr1:17822617-17823120	Chr1:18521370-18521871	Chr1:18072440-18072943	Chr1:17598739-17599242	Chr1:17408583-17409086	Chr1:18511515-18512018	Chr1:17616915-17617418	Chr1:16114090-16114597	Chr1:16865522-16866027	Chr1:19947668-19948169	Chr1:17773488-17773990
ONG0100460	Chr1:19343718-19343914	Chr1:19540651-19540847	Chr1:19162198-19162354	Chr1:19554843-19554999	Chr1:19518436-19518632	Chr1:18910977-18911173	Chr1:19459933-19460089	Chr1:19489659-19489855	Chr1:19385510-19385706	Chr1:18402795-18402991	Chr1:19208825-19209021	Chr1:18652368-18652564	Chr1:18177917-18178113	Chr1:17988912-17989108	Chr1:19091568-19091764	Chr1:18196817-18197013	Chr1:16669672-16669868	Chr1:17424570-17424766	Chr1:20607666-20607862	Chr1:18351337-18351533
ONG0100470	Chr1:19790964-19791022	Chr1:19965682-19965740	Chr1:19580471-19580529	Chr1:19980116-19980174	Chr1:19943504-19943562	Chr1:19329179-19329237	Chr1:19987975-19988033	Chr1:19936597-19936655	Chr1:19810598-19810656	Chr1:18811446-18811504	Chr1:19675129-19675187	Chr1:19061526-19061584	Chr1:18583152-18583210	Chr1:18397522-18397580	Chr1:19505178-19505236	Chr1:18605545-18605603	Chr1:17092313-17092375	Chr1:17837995-17838053	Chr1:21044109-21044172	Chr1:18710260-18710318	Chr1:20745431-20745489
ONG0100480	Chr1:19847427-19847699	Chr1:20027760-20028032	Chr1:19654249-19654521	Chr1:20042196-20042468	Chr1:20011598-20011876	Chr1:19402920-19403192	Chr1:20061789-20062061	Chr1:19993038-19993310	Chr1:19872728-19873000	Chr1:18879294-18879565	Chr1:19743013-19743284	Chr1:19129391-19129669	Chr1:18640974-18641246	Chr1:18465513-18465784	Chr1:19573410-19573681	Chr1:18674067-18674338	Chr1:17147480-17147763	Chr1:17878115-17878398	0	0
ONG0100490	Chr1:20012521-20012871	Chr1:20192821-20193171	Chr1:19809069-19809478	Chr1:20207162-20207512	Chr1:20158760-20159169	Chr1:19557763-19558172	Chr1:20216706-20217115	Chr1:20148000-20148409	Chr1:20037707-20038057	Chr1:19038946-19039299	Chr1:19902440-19902793	Chr1:19271116-19271347	Chr1:18774799-18775208	Chr1:18624931-18625284	Chr1:19733073-19733426	Chr1:18836077-18836430	0	0	0	0
ONG0100500	Chr1:20060527-20069475	Chr1:20240656-20249610	Chr1:19857676-19866626	Chr1:20254956-20263905	Chr1:20207391-20216332	Chr1:19606377-19615321	Chr1:20265309-20274253	Chr1:20196620-20205557	Chr1:20085527-20094479	Chr1:19091400-19103793	Chr1:19955001-19967403	Chr1:19323475-19335868	0	Chr1:18677560-18689953	Chr1:19785477-19797870	Chr1:18888544-18900937	0	0	0	0
ONG0100510	Chr1:20207932-20208218	Chr1:20388054-20388340	Chr1:20005054-20005340	Chr1:20401826-20402112	Chr1:20354774-20355060	Chr1:19752153-19752439	Chr1:20421159-20421445	Chr1:20352825-20353111	Chr1:20233645-20233931	Chr1:19237866-19238152	Chr1:20105114-20105400	Chr1:19472650-19472936	Chr1:18923258-18923544	Chr1:18826753-18827039	Chr1:19931910-19932196	Chr1:19035002-19035288	Chr1:17512780-17513064	Chr1:18182327-18182613	Chr1:21470728-21471014	0
ONG0100520	Chr1:20320828-20320910	Chr1:20500986-20501068	Chr1:20117951-20118033	Chr1:20508210-20508292	Chr1:20467670-20467752	Chr1:19865050-19865132	Chr1:20534532-20534614	Chr1:20452998-20453080	Chr1:20346367-20346449	Chr1:19344240-19344322	Chr1:20211443-20211525	Chr1:19578671-19578753	Chr1:19025769-19025851	Chr1:18933126-18933208	Chr1:20038294-20038376	Chr1:19141357-19141439	Chr1:17636191-17636273	0	0	0
ONG0100530	Chr1:20385370-20387578	Chr1:20565486-20567694	Chr1:20182490-20184698	Chr1:20570310-20572519	Chr1:20532227-20534435	Chr1:19929655-19931863	Chr1:20597720-20598733	Chr1:20533315-20535522	Chr1:20411181-20413391	Chr1:19406644-19408852	Chr1:20273983-20276193	Chr1:19641222-19643431	Chr1:19090280-19092487	Chr1:18995679-18997888	Chr1:20100720-20102928	Chr1:19204022-19206231	Chr1:17698233-17700442	Chr1:18347100-18349313	Chr1:21614617-21616826	Chr1:19332366-19333456
ONG0100540	Chr1:20944895-20945002	Chr1:21125022-21125129	Chr1:20725116-20725223	Chr1:21032261-21032368	Chr1:21084248-21084355	Chr1:20481707-20481814	Chr1:21106477-21106584	Chr1:21074885-21074992	Chr1:20917557-20917664	Chr1:19862943-19863050	Chr1:20732540-20732647	Chr1:20114764-20114871	Chr1:19641098-19641205	Chr1:19462726-19462833	Chr1:20575189-20575296	Chr1:19662453-19662560	0	0	0	Chr1:19855732-19856683
ONG0100550	Chr1:21562847-21569128	Chr1:21743192-21749484	Chr1:21693658-21699936	Chr1:22018107-22023352	Chr1:22052969-22059259	Chr1:21459260-21465543	Chr1:21823605-21829886	Chr1:21861135-21866373	Chr1:21501067-21507347	Chr1:20862567-20868582	Chr1:21754573-21760584	Chr1:21074779-21081059	Chr1:20618167-20624448	Chr1:20439958-20446238	Chr1:21517072-21523354	Chr1:20634729-20641009	0	0	Chr1:22659038-22664277	0
ONG0100560	Chr1:22824631-22824819	Chr1:22994630-22994818	Chr1:23055774-23055962	Chr1:23005979-23006167	Chr1:23413474-23413662	Chr1:22649822-22650010	Chr1:23066990-23067178	Chr1:23042472-23042660	Chr1:22752146-22752334	Chr1:19963716-19963904	Chr1:20852011-20852199	Chr1:22339197-22339385	Chr1:21878117-21878305	Chr1:21711054-21711242	Chr1:22752243-22752431	Chr1:21880516-21880704	Chr1:19673456-19673644	Chr1:20433393-20433581	Chr1:23593906-23594094	0
ONG0100570	Chr1:23747247-23748218	Chr1:23937888-23938859	Chr1:23986090-23989799	Chr1:23892241-23895953	Chr1:24286696-24287667	Chr1:23580859-23584565	Chr1:23925640-23926611	Chr1:23973771-23977477	Chr1:23571428-23572399	Chr1:22149634-22153342	Chr1:23044803-23048510	Chr1:23217319-23221027	Chr1:22753255-22756963	Chr1:22584154-22587862	Chr1:23637574-23641282	Chr1:22804168-22807875	Chr1:20393331-20397039	Chr1:21232182-21235889	Chr1:24593752-24594715	Chr1:22420684-22421649
ONG0100580	Chr1:23983805-23983996	Chr1:24175832-24176023	Chr1:24228726-24228917	Chr1:24115928-24116118	Chr1:24524663-24524855	Chr1:23823535-23823726	Chr1:24160458-24160649	Chr1:24216440-24216632	Chr1:23790449-23790640	Chr1:22428040-22428231	Chr1:23269503-23269694	Chr1:23447658-23447849	Chr1:22983633-22983824	Chr1:22814487-22814678	Chr1:23867730-23867921	Chr1:23042200-23042391	0	0	Chr1:24811061-24811252	0
ONG0100590	Chr1:24102625-24102703	Chr1:24294741-24294819	Chr1:24353753-24353831	Chr1:24237734-24237812	Chr1:24643299-24643377	Chr1:23948671-23948749	Chr1:24287814-24287892	Chr1:24341596-24341674	Chr1:23912400-23912478	Chr1:22571190-22571268	Chr1:23413222-23413300	Chr1:23575684-23575762	Chr1:23111707-23111785	Chr1:22942240-22942318	Chr1:23995481-23995559	Chr1:23164113-23164191	0	0	0	0
ONG0100600	Chr1:24352681-24353046	Chr1:24544468-24544833	Chr1:24552623-24552988	Chr1:24479907-24480272	Chr1:24919298-24919663	Chr1:24147625-24147990	Chr1:24481324-24481689	Chr1:24540547-24540912	Chr1:24158732-24159097	Chr1:22773951-22774316	Chr1:23615488-23615853	Chr1:23778582-23778947	Chr1:23314365-23314730	Chr1:23152465-23152832	Chr1:24198111-24198476	Chr1:23357686-23358051	Chr1:20922467-20922832	Chr1:21722735-21723100	Chr1:25089563-25089928	0
ONG0100610	Chr1:24884010-24884312	Chr1:25005103-25005405	Chr1:25012412-25012714	Chr1:24957086-24957388	Chr1:25381534-25381836	Chr1:24638462-24638764	Chr1:24965347-24965649	Chr1:25031435-25031737	Chr1:24649387-24649689	Chr1:23268404-23268707	Chr1:24115263-24115566	Chr1:24301399-24301701	Chr1:23811338-23811640	Chr1:23620050-23620352	Chr1:24699742-24700044	Chr1:23828639-23828941	Chr1:21328071-21328373	0	Chr1:25551443-25551747	Chr1:23404987-23405294
ONG0100620	Chr1:25005130-25005467	Chr1:25124326-25124663	Chr1:25133547-25133884	Chr1:25100290-25100627	Chr1:25487852-25488189	Chr1:24749144-24749481	Chr1:25076721-25077058	Chr1:25142120-25142457	Chr1:24760776-24761113	Chr1:23357857-23358194	Chr1:24204688-24205025	Chr1:24445762-24446099	Chr1:23928680-23929017	Chr1:23691374-23691711	Chr1:24766985-24767322	Chr1:23945732-23946068	0	Chr1:22248156-22248493	Chr1:25619378-25619715	0
ONG0100630	Chr1:25494402-25494487	Chr1:25639297-25639382	0	0	0	Chr1:25201683-25201768	0	Chr1:25594689-25594774	Chr1:25225202-25225287	Chr1:23796535-23796620	Chr1:24630845-24630930	Chr1:24858246-24858331	Chr1:24337939-24338020	Chr1:24102253-24102334	Chr1:25182592-25182673	Chr1:24353258-24353339	0	0	0	0
ONG0100640	Chr1:25548357-25548454	Chr1:25693247-25693344	Chr1:25715465-25715562	Chr1:25611931-25612028	Chr1:25999863-25999960	Chr1:25255667-25255764	Chr1:25411542-25411639	Chr1:25648683-25648780	Chr1:25279329-25279426	Chr1:23853055-23853155	Chr1:24687328-24687428	Chr1:24911957-24912043	Chr1:24391071-24391168	Chr1:24155265-24155362	Chr1:25235706-25235803	Chr1:24406316-24406413	0	0	0	0
ONG0100650	Chr1:25756634-25756719	Chr1:25901474-25901559	Chr1:25923778-25923863	Chr1:25819666-25819751	Chr1:26208361-26208446	Chr1:25463948-25464033	Chr1:25619261-25619346	Chr1:25856982-25857067	Chr1:25487630-25487715	Chr1:24047924-24048015	Chr1:24882115-24882206	Chr1:25096134-25096219	Chr1:24566993-24567084	Chr1:24329775-24329866	Chr1:25413583-25413674	Chr1:24582106-24582197	Chr1:22135918-22136009	Chr1:22882365-22882456	Chr1:26228462-26228553	Chr1:24149056-24149147
ONG0100660	Chr1:26093191-26093932	Chr1:26239858-26240599	Chr1:26252006-26252740	Chr1:26156888-26157630	Chr1:26545101-26545842	Chr1:25802307-25803048	Chr1:25955910-25956651	Chr1:26195372-26196113	Chr1:25809437-25810177	Chr1:24369809-24370549	Chr1:25204111-25204851	Chr1:25423438-25424181	Chr1:24891958-24892664	Chr1:24656562-24657263	Chr1:25737791-25738534	Chr1:24911004-24911706	Chr1:22465758-22466499	Chr1:23213151-23213892	Chr1:26594439-26612357	0
ONG0100670	Chr1:26202745-26202983	Chr1:26336920-26337152	Chr1:26361574-26361812	Chr1:26253731-26253963	Chr1:26654615-26654853	Chr1:25899303-25899535	Chr1:26065423-26065661	Chr1:26292373-26292605	Chr1:25919710-25919901	Chr1:24480125-24480316	Chr1:25314321-25314512	Chr1:25523338-25523570	Chr1:24991544-24991776	Chr1:24750584-24750816	Chr1:25837684-25837916	Chr1:25005036-25005268	Chr1:22564419-22564650	Chr1:23311787-23312018	Chr1:26762233-26762467	Chr1:24610882-24611117
ONG0100680	Chr1:26278077-26278151,Chr9:3621705-3621779	Chr1:26410600-26410674,Chr9:3662129-3662203	Chr1:26436883-26436957,Chr9:3596129-3596203	Chr1:26327373-26327447,Chr9:3677952-3678026	Chr1:26729921-26729995	Chr1:25972982-25973056,Chr9:3615965-3616039	Chr1:26140719-26140793,Chr9:3615477-3615551	Chr1:26366086-26366160	Chr1:25992432-25992506,Chr9:3550718-3550792	Chr1:24552835-24552909,Chr9:3314200-3314274	Chr1:25386991-25387065,Chr9:3336431-3336505	Chr1:25595888-25595962	Chr1:25073982-25074056	Chr1:24833525-24833599	Chr1:25910256-25910330	Chr1:25087455-25087529	Chr1:22637661-22637735	Chr1:23385026-23385100	Chr1:26845193-26845267	0
ONG0100690	Chr1:26290029-26290339	Chr1:26430407-26430716	Chr1:26448772-26449082	Chr1:26347182-26347491	Chr1:26741873-26742183	Chr1:25992788-25993097	Chr1:26152671-26152981	Chr1:26385892-26386201	Chr1:25999316-25999625	Chr1:24559719-24560028	Chr1:25393835-25394144	Chr1:25602774-25603083	Chr1:25080940-25081249	Chr1:24840483-24840792	Chr1:25917142-25917451	Chr1:25094413-25094722	Chr1:22644640-22644949	Chr1:23392004-23392313	Chr1:26852163-26852471	Chr1:24704588-24704897
ONG0100700	Chr1:27768438-27768629	Chr1:27878918-27879109	Chr1:27918932-27919123	Chr1:27786696-27786887	Chr1:28200291-28200482	Chr1:27439239-27439430	Chr1:27634818-27635009	Chr1:27832498-27832689	Chr1:27482032-27482223	Chr1:26005887-26006078	Chr1:26829362-26829553	Chr1:27020605-27020796	Chr1:26513141-26513332	Chr1:26272522-26272713	Chr1:27350743-27350934	Chr1:26502337-26502528	Chr1:23976906-23977097	Chr1:24730403-24730594	Chr1:28358569-28358760	Chr1:25953542-25953727
ONG0100710	Chr1:28077935-28078060	Chr1:28188797-28188922	Chr1:28228539-28228664	Chr1:28095805-28095930	Chr1:28510129-28510254	Chr1:27748996-27749122	Chr1:27944428-27944553	Chr1:28142245-28142371	Chr1:27791617-27791742	Chr1:26319100-26319225	Chr1:27142344-27142469	Chr1:27334170-27334295	Chr1:26822681-26822806	Chr1:26611058-26611183	Chr1:27660349-27660474	Chr1:26811910-26812035	Chr1:24283782-24283907	Chr1:25037239-25037364	0	0
ONG0100720	Chr1:28648614-28648750	Chr1:28759682-28759818	Chr1:28799065-28799201	Chr1:28666385-28666521	Chr1:29080805-29080941	Chr1:28319685-28319821	Chr1:28514705-28514841	Chr1:28712938-28713074	Chr1:28362130-28362266	Chr1:26859448-26859584	Chr1:27707725-27707861	Chr1:27902096-27902232	Chr1:27369785-27369921	Chr1:27246715-27246851	Chr1:28228333-28228469	Chr1:27353436-27353572	Chr1:24811564-24811700	Chr1:25564656-25564792	Chr1:29238592-29238728	0
ONG0100730	Chr1:29081634-29081714	Chr1:29178971-29179051	Chr1:29217797-29217877	Chr1:29104876-29104956	Chr1:29513745-29513825	Chr1:28752821-28752901	Chr1:28947621-28947701	Chr1:29146133-29146213	Chr1:28795166-28795246	Chr1:27364196-27364276	Chr1:28170093-28170173	Chr1:28390716-28390796	Chr1:27860539-27860619	Chr1:27720154-27720234	Chr1:28706312-28706392	Chr1:27822245-27822325	Chr1:25195538-25195618	Chr1:25947093-25947173	Chr1:29702441-29702521	Chr1:27361460-27361540
ONG0100740	Chr1:29223824-29224437	Chr1:29313904-29314517	Chr1:29380837-29381450	Chr1:29247046-29247659	Chr1:29655883-29656497	Chr1:28906989-28907602	Chr1:29089760-29090373	Chr1:29300319-29300932	Chr1:28928411-28929024	Chr1:27490511-27491124	Chr1:28299097-28299710	Chr1:28531058-28531672	Chr1:27989560-27990173	Chr1:27847464-27848078	Chr1:28846658-28847272	Chr1:27951271-27951884	Chr1:25311229-25312397	Chr1:26066545-26067735	Chr1:29805948-29806562	Chr1:27473504-27474119
ONG0100750	Chr1:29499688-29499842	Chr1:29588338-29588492	Chr1:29662266-29662420	Chr1:29528823-29528977	Chr1:29937444-29937598	Chr1:29182824-29182978	Chr1:29371138-29371292	Chr1:29576201-29576355	Chr1:29204299-29204453	Chr1:27771477-27771631	Chr1:28580001-28580155	Chr1:28800536-28800690	Chr1:28266810-28266964	Chr1:28117896-28118050	Chr1:29117144-29117298	Chr1:28232130-28232284	Chr1:25563094-25563248	Chr1:26318087-26318241	Chr1:30079905-30080058	Chr1:27736669-27736769
ONG0100760	0	0	0	0	0	0	0	0	0	0	0	Chr1:29065250-29065824	0	Chr1:28381743-28382317	Chr1:29381714-29382288	0	0	0	0	0
ONG0100770	Chr1:29791194-29791533	Chr1:29877579-29877911	Chr1:29957929-29958268	Chr1:29815285-29815623	Chr1:30226506-30226838	Chr1:29530433-29530765	Chr1:29660218-29660550	Chr1:29923856-29924188	Chr1:29500236-29500568	Chr1:28089728-28090067	Chr1:28894762-28895094	Chr1:29098396-29098735	Chr1:28557252-28557584	Chr1:28414885-28415224	Chr1:29414970-29415309	Chr1:28546720-28547052	0	0	0	0
ONG0100780	Chr1:29931640-29932509	0	Chr1:30096712-30097581	Chr1:29954027-29954896	0	0	0	0	0	Chr1:28229861-28230730	Chr1:29021734-29022586	0	0	Chr1:28530564-28531438	Chr1:29530632-29531506	Chr1:28683006-28683875	0	0	0	0
ONG0100790	Chr1:30114236-30114299	Chr1:30170842-30170905	Chr1:30279253-30279316	Chr1:30136685-30136748	Chr1:30520262-30520325	Chr1:29833887-29833950	Chr1:29953981-29954044	Chr1:30227313-30227376	Chr1:29817961-29818024	Chr1:28412420-28412483	Chr1:29179534-29179597	Chr1:29374325-29374441	Chr1:28825822-28825885	Chr1:28678035-28678151	Chr1:29678241-29678357	Chr1:28866172-28866235	Chr1:26126044-26126160	Chr1:26880943-26881059	Chr1:30681848-30681911	0
ONG0100800	Chr1:30235370-30235486	Chr1:30291908-30292024	Chr1:30400355-30400471	Chr1:30257770-30257886	Chr1:30629444-30629560	Chr1:29945626-29945742	Chr1:30062742-30062858	Chr1:30339046-30339162	Chr1:29939001-29939117	Chr1:28520919-28521035	Chr1:29288030-29288146	Chr1:29506556-29506672	Chr1:28939523-28939639	Chr1:28810244-28810360	Chr1:29810554-29810670	Chr1:28987293-28987409	0	0	0	Chr1:28533801-28533914
ONG0100810	Chr1:31080696-31080908	Chr1:31137175-31137387	Chr1:31318998-31319210	Chr1:31102921-31103133	Chr1:31474912-31475124	Chr1:30791247-30791459	Chr1:30908200-30908412	Chr1:31184609-31184821	Chr1:30784457-30784669	Chr1:29409040-29409252	Chr1:30166662-30166874	Chr1:30404454-30404666	Chr1:29850375-29850587	Chr1:29732848-29733060	Chr1:30707468-30707680	Chr1:29884529-29884741	Chr1:27213355-27213567	Chr1:27884742-27884954	Chr1:31780878-31781090	Chr1:29629595-29629832	Chr1:32768821-32769067
ONG0100820	Chr1:31536013-31536370	Chr1:31599521-31599878	Chr1:31730354-31730711	Chr1:31583979-31584336	Chr1:31944062-31944419	Chr1:31260425-31260782	Chr1:31370469-31370826	Chr1:31652190-31652547	Chr1:31301592-31302571	Chr1:29794856-29795213	Chr1:30542636-30543615	Chr1:30761343-30761700	Chr1:30249800-30250157	Chr1:30082133-30082490	Chr1:31064716-31065073	Chr1:30360812-30361792	Chr1:27569829-27570197	Chr1:28235833-28236201	Chr1:32232792-32233149	Chr1:29978950-29979913	Chr1:33262099-33262504
ONG0100830	Chr1:31594106-31594188	Chr1:31657684-31657766	Chr1:31787402-31787484	Chr1:31642052-31642134	Chr1:32002153-32002235	Chr1:31318511-31318593	Chr1:31428538-31428620	Chr1:31712849-31712931	Chr1:31359638-31359720	Chr1:29852637-29852719	Chr1:30600555-30600637	Chr1:30822001-30822083	Chr1:30310455-30310537	Chr1:30142780-30142862	Chr1:31125371-31125453	Chr1:30436775-30436857	0	0	0	0
ONG0100840	Chr1:32241363-32241726	Chr1:32323975-32324635	Chr1:32410836-32411499	Chr1:32263988-32264354	Chr1:32624304-32624667	Chr1:31940657-31941020	Chr1:32065250-32065613	Chr1:32346088-32346791	Chr1:31981704-31982067	Chr1:30515717-30516359	Chr1:31265636-31266278	Chr1:31460229-31460932	Chr1:30942915-30943618	Chr1:30773209-30773912	Chr1:31793053-31793756	Chr1:31079850-31080553	Chr1:28241989-28242707	Chr1:28907446-28908164	Chr1:32983785-32984369	Chr1:30738302-30738820
ONG0100850	Chr1:33489771-33490166	Chr1:33568692-33569087	Chr1:33614073-33614558	Chr1:33485262-33485657	Chr1:33845560-33845955	Chr1:33161915-33162310	Chr1:33286589-33286984	Chr1:33508694-33509179	Chr1:33202890-33203285	Chr1:31750532-31750927	Chr1:32462231-32462626	Chr1:32657793-32658188	Chr1:32134494-32134889	Chr1:31930561-31931046	Chr1:32973674-32974069	Chr1:32282460-32282855	Chr1:29341293-29341687	Chr1:30005964-30006358	Chr1:34263235-34263628	0
ONG0100860	Chr1:34272489-34273554	Chr1:34351482-34352547	Chr1:34394798-34395863	Chr1:34283538-34284603	Chr1:34648374-34649439	Chr1:33964698-33965763	Chr1:34089288-34090352	Chr1:34302783-34303848	Chr1:34020736-34021801	Chr1:32539257-32540308	Chr1:33271663-33272728	Chr1:33465820-33466885	Chr1:32952946-32954011	Chr1:32751041-32752106	Chr1:33786381-33787446	Chr1:33116754-33117819	Chr1:30125575-30126641	Chr1:30787391-30788459	Chr1:35180291-35181357	0
ONG0100870	Chr1:34536454-34536885	Chr1:34615288-34615719	Chr1:34658626-34659057	Chr1:34558925-34559356	Chr1:34938662-34939093	Chr1:34254973-34255404	Chr1:34352702-34353133	Chr1:34566861-34567292	Chr1:34284789-34285221	Chr1:32803951-32804382	Chr1:33534559-33534990	Chr1:33740701-33741132	Chr1:33227701-33228132	Chr1:33032702-33033133	Chr1:34061067-34061498	Chr1:33392136-33392567	Chr1:30389855-30390286	Chr1:31051164-31051595	0	0
ONG0100880	Chr1:34659664-34659776	Chr1:34726382-34726494	Chr1:34769720-34769832	Chr1:34775172-34775284	Chr1:35029135-35029247	Chr1:34345450-34345562	Chr1:34453758-34453870	Chr1:34695326-34695438	Chr1:34395910-34396022	Chr1:32902559-32902671	Chr1:33620651-33620759	Chr1:33828093-33828205	Chr1:33315096-33315208	Chr1:33161165-33161277	Chr1:34148526-34148638	Chr1:33479511-33479623	0	0	0	Chr1:33078294-33078406
ONG0100890	0	0	0	0	0	0	0	Chr1:35032716-35124685	0	0	0	Chr1:34223473-34312493	Chr1:33711301-33803242	Chr1:33497812-33589786	Chr1:34556817-34648782	Chr1:33817804-33909774	0	0	0	0
ONG0100900	Chr1:35196205-35196451	Chr1:35227912-35228158	Chr1:35271159-35271405	Chr1:35263745-35263991	Chr1:35507718-35507964	Chr1:34823445-34823691	Chr1:34933625-34933871	Chr1:35246345-35246591	Chr1:34886415-34886661	Chr1:33396403-33396649	Chr1:34148646-34148892	Chr1:34434184-34434430	Chr1:33924873-33925119	Chr1:33711432-33711678	Chr1:34770415-34770661	Chr1:34031435-34031681	Chr1:30924847-30925091	Chr1:31583430-31583676	0	0
ONG0100910	Chr1:35613942-35614105	Chr1:35612979-35613142	Chr1:35656180-35656343	Chr1:35630447-35630607	Chr1:35897314-35897477	Chr1:35213035-35213198	Chr1:35317879-35318042	Chr1:35663367-35663528	Chr1:35290294-35290457	Chr1:33763188-33763348	Chr1:34560870-34561033	Chr1:34850844-34851005	Chr1:34291676-34291839	Chr1:34127870-34128031	Chr1:35136013-35136176	Chr1:34450630-34450791	Chr1:31275561-31275724	Chr1:31930712-31930875	Chr1:36411941-36412104	0
ONG0100920	Chr1:35845017-35866690	Chr1:35840058-35861726	Chr1:35883270-35904867	Chr1:35917453-35939464	Chr1:36127105-36136013	Chr1:35442844-35451751	Chr1:35544973-35566633	Chr1:35912474-35918658	Chr1:35524750-35554854	Chr1:34027898-34037097	Chr1:34825609-34834784	Chr1:35080451-35086634	Chr1:34527685-34533868	Chr1:34369739-34375922	Chr1:35371849-35378032	Chr1:34675656-34681839	Chr1:31487456-31493636	Chr1:32139840-32146020	Chr1:36662075-36668225	0
ONG0100930	Chr1:36073218-36073303	Chr1:36068221-36068306	Chr1:36111348-36111433	Chr1:36152709-36152794	Chr1:36359418-36359503	Chr1:35675129-35675214	Chr1:35726737-35726822	Chr1:36048982-36049067	Chr1:35774400-35774485	Chr1:34236414-34236499	Chr1:35033827-35033912	Chr1:35215913-35215998	Chr1:34662514-34662599	Chr1:34504990-34505075	Chr1:35520163-35520248	Chr1:34823495-34823580	Chr1:31640802-31640887	Chr1:32288917-32289002	0	0
ONG0100940	Chr1:36175939-36176024	Chr1:36163177-36163262	Chr1:36206380-36206465	Chr1:36247669-36247754	Chr1:36455645-36455730	Chr1:35771347-35771432	Chr1:35822558-35822796	Chr1:36153408-36153493	Chr1:35870393-35870478	Chr1:34331366-34331451	Chr1:35128824-35128909	Chr1:35320354-35320439	Chr1:34768938-34769023	Chr1:34609430-34609515	Chr1:35626585-35626670	Chr1:34929913-34929998	Chr1:31748032-31748117	Chr1:32395971-32396056	Chr1:36933889-36933974	Chr1:34364185-34364344
ONG0100950	0	0	0	0	0	0	0	Chr1:37016974-37017346	0	0	0	Chr1:36129758-36130130	Chr1:35660368-35660740	Chr1:35465009-35465381	Chr1:36499973-36500345	Chr1:35837751-35838123	0	0	0	0
ONG0100960	Chr1:37155995-37156359	Chr1:37109910-37110274	Chr1:37136498-37136862	Chr1:37207509-37207873	Chr1:37398985-37399349	Chr1:36714710-36715074	Chr1:36761371-36761735	Chr1:37144546-37144942	Chr1:36837300-36837696	Chr1:35284801-35285165	Chr1:36079455-36079851	Chr1:36243749-36244146	Chr1:35775978-35776375	Chr1:35580599-35580996	Chr1:36615560-36615957	Chr1:35953331-35953728	Chr1:32607497-32607893	Chr1:33253141-33253537	Chr1:37968549-37968914	0
ONG0100970	Chr1:37284269-37284378	Chr1:37235184-37235293	Chr1:37261748-37261857	Chr1:37332628-37332737	Chr1:37523409-37523518	Chr1:36839126-36839235	Chr1:36885777-36885886	Chr1:37284205-37284314	Chr1:36976863-36976972	Chr1:35410026-35410135	Chr1:36208824-36208933	Chr1:36381466-36381575	Chr1:35913558-35913667	Chr1:35718363-35718472	Chr1:36753413-36753522	Chr1:36078804-36078913	Chr1:32729367-32729476	Chr1:33374942-33375051	Chr1:38103891-38104000	0
ONG0100980	Chr1:38332693-38332994	Chr1:38387209-38387510	Chr1:38417264-38417565	Chr1:38409211-38409513	Chr1:38572173-38572474	Chr1:37887686-37887987	Chr1:37934303-37934605	Chr1:38343978-38344279	Chr1:38008287-38008588	Chr1:36485777-36486078	Chr1:37227569-37227871	Chr1:37421479-37421717	Chr1:36954301-36954539	Chr1:36756394-36756632	Chr1:37791230-37791468	Chr1:37164077-37164315	Chr1:33668646-33668948	Chr1:34328266-34328568	0	0
ONG0100990	Chr1:38542752-38543120	Chr1:38597402-38597770	Chr1:38627283-38627651	Chr1:38626750-38627118	Chr1:38782253-38782621	Chr1:38097763-38098131	Chr1:38144377-38144745	Chr1:38561542-38561910	Chr1:38218341-38218709	Chr1:36696028-36696396	Chr1:37437705-37438073	Chr1:37685198-37685566	Chr1:37217794-37218162	Chr1:37019956-37020324	Chr1:38054824-38055192	Chr1:37427723-37428091	Chr1:33870563-33870848	Chr1:34527307-34527675	Chr1:39395965-39396249	Chr1:36583741-36584268
ONG0101000	Chr1:39193943-39193988	Chr1:39228796-39228842	Chr1:39258464-39258511	Chr1:39312344-39312389	Chr1:39437298-39437343	Chr1:38752741-38752786	Chr1:38799333-38799378	Chr1:39247317-39247362	Chr1:38861549-38861594	Chr1:37364431-37364476	Chr1:38105973-38106018	Chr1:38365049-38365093	Chr1:37895112-37895156	Chr1:37698102-37698146	Chr1:38732551-38732595	Chr1:38105695-38105739	Chr1:34494323-34494368	Chr1:35165769-35165814	Chr1:40065564-40065608	0
ONG0101010	0	0	0	0	0	0	0	0	0	0	0	Chr1:38938198-38941759	Chr1:38468688-38472249	Chr1:38269664-38273225	Chr1:39305958-39309519	Chr1:38677427-38680988	0	0	0	0
ONG0101020	Chr1:39903145-39903473	Chr1:39944269-39944598	Chr1:39977725-39978054	Chr1:40028437-40028766	Chr1:40157263-40157592	Chr1:39472538-39472867	Chr1:39518941-39519270	Chr1:39963634-39963963	Chr1:39577207-39577536	Chr1:38063037-38063366	Chr1:38812829-38813155	Chr1:39050495-39050824	Chr1:38580953-38581282	Chr1:38381764-38382093	Chr1:39418094-39418423	Chr1:38789614-38789943	Chr1:35169070-35169394	Chr1:35845733-35846057	Chr1:40770763-40771092	0
ONG0101030	Chr1:40595060-40595238	Chr1:40637092-40637270	Chr1:40631622-40631800	Chr1:40708972-40709144	Chr1:40820611-40820789	Chr1:40135887-40136065	Chr1:40182332-40182510	Chr1:40644451-40644622	Chr1:40258085-40258257	Chr1:38744357-38744532	Chr1:39454286-39454462	Chr1:39703869-39704047	Chr1:39236447-39236625	Chr1:39035766-39035944	Chr1:40072743-40072921	Chr1:39430822-39431000	Chr1:35795081-35795259	Chr1:36475623-36475807	0	0
ONG0101040	Chr1:40670590-40688743	Chr1:40712623-40732206	Chr1:40707169-40725311	Chr1:40783768-40801915	Chr1:40896128-40914274	Chr1:40211407-40229555	Chr1:40257847-40275995	Chr1:40719169-40737830	Chr1:40332779-40350928	Chr1:38819195-38837851	Chr1:39528401-39546549	Chr1:39779386-39797534	0	Chr1:39110347-39128810	Chr1:40147348-40167241	0	0	0	0	0
ONG0101050	Chr1:40759333-40759728	Chr1:40802889-40803286	Chr1:40795884-40796281	Chr1:40872545-40872942	Chr1:40984996-40985392	Chr1:40300291-40300688	Chr1:40346725-40347122	Chr1:40807965-40808361	Chr1:40421570-40421967	Chr1:38908451-38908837	Chr1:39615790-39616187	Chr1:39868536-39868933	Chr1:39391263-39391659	Chr1:39198062-39198458	Chr1:40236522-40236919	Chr1:39578355-39578750	Chr1:35937203-35937595	Chr1:36621889-36622284	Chr1:41642438-41642833	0
ONG0101060	Chr1:40910681-40911164	Chr1:40972333-40972816	Chr1:40957338-40957821	Chr1:41022767-41023250	Chr1:41154427-41154910	Chr1:40450905-40451388	Chr1:40497334-40497817	Chr1:40977408-40977891	Chr1:40599565-40600048	Chr1:39063184-39063667	Chr1:39775019-39775502	Chr1:40022303-40022786	Chr1:39557424-39557907	Chr1:39351411-39351894	Chr1:40390376-40390859	Chr1:39736603-39737086	0	0	Chr1:41789734-41790217	0
ONG0101070	Chr1:41149432-41149743	Chr1:41204186-41204497	Chr1:41183969-41184280	Chr1:41273812-41274123	Chr1:41387586-41387897	Chr1:40691390-40691701	Chr1:40737823-40738134	Chr1:41210438-41210749	Chr1:40832030-40832341	Chr1:39297920-39298231	Chr1:40009602-40009913	Chr1:40257491-40257800	0	Chr1:39585345-39585654	Chr1:40625628-40625937	Chr1:39979620-39979931	Chr1:36298661-36298971	Chr1:36983835-36984145	Chr1:42043517-42043827	0
ONG0101080	Chr1:41638468-41638545	Chr1:41687713-41687790	Chr1:41660375-41660452	Chr1:41779747-41779824	Chr1:41864180-41864257	Chr1:41219207-41219284	Chr1:41265711-41265788	Chr1:41675489-41675566	Chr1:41290014-41290091	Chr1:39748285-39748362	Chr1:40459816-40459893	Chr1:40698198-40698275	Chr1:40190291-40190368	Chr1:40025856-40025933	Chr1:41066314-41066391	Chr1:40443169-40443246	0	0	Chr1:42490281-42490358	0
ONG0101090	Chr1:41967652-41967832	0	0	Chr1:42090758-42090939	0	0	0	Chr1:41986451-41986632	Chr1:41600737-41600918	0	0	Chr1:41025029-41025209	Chr1:40519326-40519506	Chr1:40350696-40350876	Chr1:41366704-41366884	Chr1:40771570-40771751	Chr1:37019115-37019295	0	Chr1:42783044-42783224	0
ONG0101100	0	0	0	0	0	0	0	0	0	0	0	Chr1:41644760-41644980	Chr1:41131152-41131372	Chr1:40944722-40944942	Chr1:42023534-42023754	0	0	0	Chr1:43394685-43394905	0
ONG0101110	Chr1:43097589-43097721	Chr1:43055368-43055500	Chr1:43014624-43014756	Chr1:43146215-43146347	Chr1:43221395-43221527	Chr1:42576078-42576210	Chr1:42530967-42531099	Chr1:43042079-43042211	Chr1:42642810-42642942	Chr1:41052872-41053004	Chr1:41759858-41759992	Chr1:42002249-42002378	Chr1:41488353-41488482	Chr1:41295319-41295448	Chr1:42380667-42380796	Chr1:41818086-41818220	Chr1:37969973-37970103	Chr1:38675681-38675811	Chr1:43847906-43848036	0
ONG0101120	Chr1:43255237-43256578	0	0	0	0	0	0	0	0	0	Chr1:41943238-41944579	Chr1:42219228-42220569	Chr1:41719218-41720559	Chr1:41455066-41456407,1:41486039-41487380	Chr1:42628218-42629559	Chr1:41982233-41983574	Chr1:38093449-38094791	Chr1:38806417-38807759	0	0
ONG0101130	Chr1:43264002-43264464	0	0	0	0	0	0	0	0	0	Chr1:41972132-41972596	Chr1:42227998-42228461	Chr1:41727985-41728448	Chr1:41494808-41495271	Chr1:42636986-42637449	Chr1:42011117-42011581	Chr1:38102229-38102693	Chr1:38815195-38815659	0	0
ONG0101140	Chr1:43276579-43276690	0	0	0	0	0	0	0	0	0	Chr1:41985109-41985220	Chr1:42240565-42240676	Chr1:41740552-41740663	Chr1:41507375-41507486	Chr1:42649553-42649664	Chr1:42024090-42024201	Chr1:38117304-38117517	Chr1:38827679-38827892	0	Chr1:41073093-41073295
ONG0101150	0	0	0	0	0	0	0	0	0	Chr1:41304207-41304558	0	Chr1:42455087-42455438	Chr1:41955561-41955912	Chr1:41721837-41722188	Chr1:42864643-42864994	0	0	0	0	0
ONG0101160	Chr1:43588369-43588430	Chr1:43424113-43424174	Chr1:43383256-43383316	Chr1:43520305-43520366	Chr1:43592531-43592592	Chr1:42948659-42948720	Chr1:42903555-42903616	Chr1:43412291-43412352	Chr1:43011596-43011657	Chr1:41451711-41451772	Chr1:42251017-42251078	Chr1:42604600-42604661	Chr1:42103002-42103063	Chr1:41881816-41881877	Chr1:43015715-43015776	Chr1:42285385-42285446	0	0	0	0
ONG0101170	0	0	Chr1:43459591-43459664	0	0	0	0	Chr1:43488716-43488789	0	Chr1:41528071-41528144	0	0	0	Chr1:41958241-41958314	0	Chr1:42361747-42361820	0	0	0	0
ONG0101180	Chr1:43891384-43891471	Chr1:43725563-43725650	Chr1:43665354-43665441	Chr1:43813400-43813487	Chr1:43923712-43923799	Chr1:43289138-43289225	Chr1:43243940-43244027	Chr1:43688070-43688157	Chr1:43341146-43341233	Chr1:41727418-41727505	Chr1:42535502-42535589	Chr1:42886062-42886149	0	Chr1:42157377-42157464	Chr1:43297109-43297196	Chr1:42561369-42561456	0	0	0	Chr1:41751605-41751691
ONG0101190	Chr1:44397361-44397790	0	0	0	0	0	0	Chr1:44183183-44183612	0	Chr1:42222227-42222656	Chr1:43069238-43069667	Chr1:43368782-43369211	Chr1:42843111-42843540	Chr1:42668977-42669406	0	Chr1:43063553-43063982	0	0	0	0
ONG0101200	0	0	Chr1:44530889-44530988	0	0	0	Chr1:44182761-44182860	Chr1:44595378-44595477	0	Chr1:42615539-42615638	0	Chr1:43800718-43800817	Chr1:43258709-43258808	Chr1:43113948-43114047	Chr1:44104615-44104714	Chr1:43488390-43488489	Chr1:39501683-39501782	Chr1:40178953-40179052	Chr1:45499857-45499956	0
ONG0101210	Chr1:44913091-44913672	Chr1:44710819-44711400	Chr1:44634638-44635218	Chr1:44811587-44812168	Chr1:44981908-44982488	Chr1:44345885-44346465	Chr1:44299069-44299649	Chr1:44697490-44698072	Chr1:44350667-44351248	Chr1:42731846-42732426	Chr1:43598572-43599152	Chr1:43911060-43911640	Chr1:43363472-43364051	Chr1:43216044-43216626	Chr1:44209323-44209903	Chr1:43597651-43598230	Chr1:39602832-39603421	Chr1:40280138-40280727	Chr1:45615070-45615657	0
ONG0200010	Chr2:794027-801755	Chr2:760545-768335	Chr2:878316-886105,WGGU01000045.1:69039-76829	Chr2:858916-866622	Chr2:768078-775825	Chr2:757467-768363	Chr2:748007-755750	Chr2:742020-749813	Chr2:791896-793952	Chr2:766113-777009	Chr2:767912-775970	Chr2:815353-826250	Chr2:788359-799257	Chr2:807669-818565	Chr2:774970-782762	Chr2:815193-826090	Chr2:733620-741347	Chr2:781013-788740	Chr2:772272-780016	Chr2:833635-841384
ONG0200020	Chr2:995987-996235	Chr2:988533-988781	Chr2:1102522-1102770	Chr2:1068232-1068482	Chr2:994083-994333	Chr2:979259-979507	Chr2:972945-973193	Chr2:966881-967129	Chr2:1004696-1004944	Chr2:983854-984102	Chr2:1001267-1001504	Chr2:1033056-1033304	Chr2:1007534-1007782	Chr2:1025234-1025482	Chr2:998077-998325	Chr2:1032921-1033169	0	0	Chr2:985929-986177	0
ONG0200030	Chr2:2342778-2343417	Chr2:2320135-2320774	Chr2:2497215-2497854	Chr2:2393969-2394608	Chr2:2318410-2319058	Chr2:2348195-2348834	Chr2:2341026-2341665	Chr2:2350751-2351399	Chr2:2315979-2316618	Chr2:2314574-2315213	Chr2:2329842-2330481	Chr2:2373307-2373946	Chr2:2330542-2331181	Chr2:2392408-2393047	Chr2:2326949-2327588	Chr2:2373176-2373815	Chr2:2247513-2248152	Chr2:2312199-2312838	Chr2:2317794-2318405	Chr2:2547233-2547868	Chr2:40159365-40160004
ONG0200040	Chr2:2380123-2381138	0	Chr2:2550277-2551292	Chr2:2430823-2431839	Chr2:2355760-2356775	Chr2:2396216-2397231	Chr2:2389047-2390062	Chr2:2398781-2399796	Chr2:2353320-2354335	Chr2:2353008-2354023	Chr2:2368279-2369294	Chr2:2410604-2411619	Chr2:2367839-2368854	Chr2:2429960-2430975	Chr2:2364252-2365267	Chr2:2410026-2411041	0	0	0	Chr2:2582897-2583912
ONG0200050	Chr2:2474943-2475245	Chr2:2414919-2415221	Chr2:2630205-2630507	0	Chr2:2450611-2450913	Chr2:2476205-2476507	Chr2:2469041-2469343	Chr2:2478773-2479075	Chr2:2448143-2448445	Chr2:2442277-2442579	Chr2:2457522-2457824	Chr2:2554544-2554846	Chr2:2504632-2504934	Chr2:2490394-2490696	Chr2:2508182-2508484	0	Chr2:2389317-2389619	Chr2:2455812-2456114	0	Chr2:2650275-2650577
ONG0200060	Chr2:2971730-2972196	Chr2:2796083-2796550	Chr2:3043928-3044395	0	Chr2:2955961-2956432	0	0	0	Chr2:2952984-2953449	Chr2:2820042-2820508	Chr2:2835271-2835737	0	0	Chr2:2944013-2944478	Chr2:2954244-2954709	0	0	0	0	0
ONG0200070	0	Chr2:3217399-3217476	Chr2:3496655-3496732	Chr2:3185123-3185201	Chr2:3348034-3348111	Chr2:3277749-3277826	Chr2:3265466-3265543	Chr2:3303866-3303943	Chr2:3378170-3378247	0	0	Chr2:3392261-3392338	Chr2:3345728-3345805	Chr2:3328507-3328584	Chr2:3372426-3372503	Chr2:3193069-3193146	0	0	0	0
ONG0200080	Chr2:4803416-4803794	Chr2:4545787-4546165	Chr2:4866279-4866658	Chr2:4530273-4530651	Chr2:4690987-4691365	Chr2:4630467-4630845	Chr2:4599812-4600190	Chr2:4661749-4662127	Chr2:4689407-4689785	Chr2:4569344-4569722	Chr2:4551898-4552276	Chr2:4746582-4746960	Chr2:4671766-4672144	Chr2:4706187-4706565	Chr2:4690952-4691330	Chr2:4531865-4532243	Chr2:4422498-4422773	Chr2:4473390-4473665	Chr2:4376686-4376961	0
ONG0200090	Chr2:5042058-5042267	Chr2:4786556-4786765	Chr2:5106787-5106996	Chr2:4770364-4770573	Chr2:4931945-4932154	Chr2:4859885-4860094	Chr2:4813932-4814141	Chr2:4901106-4901314	Chr2:4918852-4919061	Chr2:4798847-4799056	Chr2:4782509-4782718	Chr2:4967183-4967392	Chr2:4892287-4892496	Chr2:4903981-4904190	Chr2:4902882-4903091	Chr2:4762676-4762885	Chr2:4648985-4649194	Chr2:4715107-4715316	Chr2:4646629-4646838	0
ONG0200100	Chr2:5555759-5555910	Chr2:5295110-5295261	Chr2:5615461-5615612	Chr2:5260512-5260663	Chr2:5440578-5440729	Chr2:5349453-5349619	Chr2:5317756-5317907	Chr2:5409553-5409704	Chr2:5407998-5408164	Chr2:5288685-5288851	Chr2:5270329-5270480	Chr2:5489630-5489796	Chr2:5414262-5414428	Chr2:5420441-5420607	Chr2:5419943-5420109	Chr2:5259699-5259865	Chr2:5164716-5164875	Chr2:5230944-5231103	Chr2:5144906-5145065	Chr2:5588107-5588261
ONG0200110	Chr2:5653345-5653433	Chr2:5392528-5392749	Chr2:5712878-5713099	Chr2:5357615-5357836	Chr2:5538013-5538234	Chr2:5411002-5411223	Chr2:5415181-5415402	Chr2:5506968-5507189	Chr2:5469567-5469788	Chr2:5350253-5350474	Chr2:5346568-5346789	Chr2:5551161-5551382	Chr2:5475777-5475998	Chr2:5481956-5482177	Chr2:5481448-5481669	Chr2:5321265-5321486	Chr2:5230288-5230507	Chr2:5305551-5305772	Chr2:5207500-5207617	0
ONG0200120	Chr2:6007862-6007962	Chr2:5759445-5759545	Chr2:6059896-6059996	Chr2:5724377-5724477	Chr2:5904915-5905015	Chr2:5763944-5764044	Chr2:5782063-5782163	Chr2:5873786-5873886	Chr2:5822496-5822596	Chr2:5690706-5690806	Chr2:5693751-5693851	Chr2:5902365-5902465	Chr2:5808471-5808571	Chr2:5814555-5814655	Chr2:5805336-5805436	Chr2:5654092-5654192	0	0	Chr2:5549584-5549684	0
ONG0200130	Chr2:6375598-6376302	Chr2:6138539-6139243	Chr2:6439003-6439707	Chr2:6102925-6103628	Chr2:6267673-6268382	Chr2:6147678-6148381	Chr2:6136579-6137281	Chr2:6228533-6229235	Chr2:6198848-6199551	Chr2:6058103-6058806	Chr2:6059174-6059876	Chr2:6270309-6271062	Chr2:6176595-6177348	Chr2:6170475-6171228	Chr2:6159622-6160375	Chr2:6022113-6022866	0	0	0	Chr2:6397681-6398431
ONG0200140	Chr2:6899360-6899634	Chr2:6571154-6571428	Chr2:6871270-6871544	Chr2:6540471-6540745	Chr2:6791480-6791754	Chr2:6578042-6578316	Chr2:6593009-6593283	Chr2:6695015-6695289	Chr2:6629238-6629512	Chr2:6536509-6536783	Chr2:6624803-6625077	Chr2:6745760-6746034	Chr2:6653673-6653947	Chr2:6647854-6648128	Chr2:6703953-6704227	Chr2:6500632-6500906	0	0	0	0
ONG0200150	Chr2:6946796-6946978	Chr2:6618608-6618790	Chr2:6918694-6918876	Chr2:6587911-6588093	Chr2:6838920-6839102	Chr2:6625489-6625671	Chr2:6640449-6640631	Chr2:6742469-6742651	Chr2:6676682-6676864	Chr2:6583969-6584151	Chr2:6672308-6672490	Chr2:6794096-6794278	Chr2:6702023-6702205	Chr2:6696186-6696368	Chr2:6752285-6752467	Chr2:6548924-6549106	0	0	0	0
ONG0200160	Chr2:7228496-7228780	Chr2:6898592-6898876	Chr2:7206147-7206431	Chr2:6875174-6875458	Chr2:7118855-7119139	Chr2:6906849-6907133	Chr2:6983715-6984001	Chr2:7024107-7024391	Chr2:6964100-6964384	Chr2:6902635-6902919	Chr2:7026978-7027264	Chr2:7134312-7134598	Chr2:7042196-7042482	Chr2:6996450-6996734	Chr2:7091118-7091404	Chr2:6849718-6850002	Chr2:6900143-6900216	Chr2:6821214-6821287	Chr2:6990276-6990562	Chr2:7323167-7323530
ONG0200170	Chr2:8212480-8212753	Chr2:7826895-7827169	Chr2:8147156-8147429	Chr2:7851642-7851915	Chr2:8095836-8096109	Chr2:7868206-7868479	Chr2:7836610-7836883	Chr2:8000112-8000385	Chr2:7923250-7923523	Chr2:7842472-7842746	Chr2:7939296-7939570	Chr2:8003608-8003882	Chr2:7902288-7902562	Chr2:7857509-7857783	Chr2:7951302-7951576	Chr2:7782700-7782974	Chr2:7812471-7812744	Chr2:7752945-7753218	0	0
ONG0200180	Chr2:9519166-9519238	Chr2:8964554-8964626	Chr2:9444398-9444472	Chr2:9153093-9153165	Chr2:9255447-9255519	Chr2:9227186-9227258	Chr2:9313324-9313396	0	Chr2:9223648-9223720	0	0	Chr2:9143590-9143664	Chr2:9023248-9023322	Chr2:9082464-9082538	Chr2:9093018-9093092	Chr2:8971368-8971442	0	Chr2:9053546-9053620	0	0
ONG0200190	0	Chr2:9056102-9056397	0	Chr2:9244485-9244780	0	0	Chr2:9404718-9405013	Chr2:9435067-9435362	Chr2:9306091-9306386	Chr2:9286809-9287103	Chr2:9371536-9371831	Chr2:9511122-9511418	Chr2:9394217-9394513	Chr2:9415246-9415542	Chr2:9457022-9457318	Chr2:9345088-9345384	Chr2:9207577-9207872	Chr2:9200077-9200372	Chr2:9308897-9309191	Chr2:9755027-9755324
ONG0200200	Chr2:9681255-9681677	Chr2:9118406-9118828	Chr2:9607390-9607812	Chr2:9306776-9307198	Chr2:9417527-9417949	Chr2:9389430-9389852	Chr2:9467015-9467434	Chr2:9497353-9497775	Chr2:9368377-9368799	Chr2:9345928-9346350	Chr2:9430181-9430603	Chr2:9557110-9557532	Chr2:9440224-9440646	Chr2:9462338-9462760	Chr2:9503030-9503452	Chr2:9391486-9391908	Chr2:9244295-9244717	Chr2:9236755-9237177	Chr2:9345813-9346235	Chr2:9787356-9787781
ONG0200210	Chr2:9871591-9871675	Chr2:9328907-9329075	0	Chr2:9502345-9502513	0	0	Chr2:9662484-9662652	Chr2:9692807-9692975	Chr2:9563823-9563991	0	Chr2:9625141-9625309	Chr2:9753070-9753238	Chr2:9636078-9636246	Chr2:9657859-9658027	Chr2:9699039-9699207	Chr2:9587269-9587437	0	0	Chr2:9600872-9601040	0
ONG0200220	Chr2:9943636-9943731	Chr2:9397386-9397481	0	Chr2:9570823-9570918	0	0	Chr2:9730951-9731046	Chr2:9761287-9761382	Chr2:9632301-9632396	0	Chr2:9693547-9693642	Chr2:9821551-9821646	Chr2:9704542-9704637	Chr2:9726303-9726398	Chr2:9767495-9767590	Chr2:9655719-9655814	Chr2:9491382-9491477	Chr2:9483708-9483803	Chr2:9638244-9638339	0
ONG0200230	Chr2:10622925-10624136	Chr2:9965681-9966912	Chr2:10316255-10317466	Chr2:10166650-10167878	Chr2:10126477-10127689	Chr2:10103579-10104810	Chr2:10291644-10292855	Chr2:10337062-10338292	Chr2:10227357-10228588	Chr2:10166305-10167534	Chr2:10269456-10270687	Chr2:10406652-10407881	Chr2:10290039-10291268	Chr2:10310945-10312174	Chr2:10348457-10349686	Chr2:10240570-10241799	Chr2:10096740-10097976	Chr2:10098648-10099884	Chr2:10460822-10462048	Chr2:10710967-10713534
ONG0200240	Chr2:11452519-11454071	Chr2:10972450-10974002	Chr2:11252548-11254100	Chr2:11113140-11114692	Chr2:11003457-11005009	Chr2:11050293-11051845	Chr2:11121416-11122968	Chr2:11218142-11219694	Chr2:11173811-11175363	Chr2:11051442-11052994	Chr2:11184722-11186322	Chr2:11290251-11291807	Chr2:11173260-11174810	Chr2:11194477-11196027	Chr2:11235620-11237170	Chr2:11124061-11125611	Chr2:10916316-10917778	Chr2:10943069-10944531	Chr2:11026077-11027540	Chr2:11711705-11713910
ONG0200250	Chr2:11642903-11643108	Chr2:11162713-11162918	Chr2:11442849-11443053	Chr2:11303346-11303518	Chr2:11193795-11194000	Chr2:11235734-11235906	Chr2:11311800-11312005	Chr2:11408455-11408660	Chr2:11359227-11359399	Chr2:11241837-11242042	Chr2:11374887-11375347	Chr2:11460170-11460342	Chr2:11343143-11343315	Chr2:11364326-11364498	Chr2:11405605-11405777	Chr2:11293923-11294095	0	0	0	0
ONG0200260	Chr2:12515919-12517517	Chr2:12036132-12037730	Chr2:12317724-12319322	Chr2:12251535-12253126	Chr2:12091687-12093287	Chr2:12159964-12161562	Chr2:12209744-12211342	Chr2:12298153-12299753	Chr2:12257752-12259350	Chr2:12115209-12116807	Chr2:12276624-12278222	Chr2:12271356-12273030	Chr2:12168976-12170652	Chr2:12182343-12184017	Chr2:12224137-12225811	Chr2:12138730-12140404	Chr2:11785773-11787449	Chr2:11827301-11828976	0	0
ONG0200270	Chr2:12749433-12749501	Chr2:12278108-12278176	Chr2:12551469-12551537	Chr2:12493482-12493550	Chr2:12333675-12333743	Chr2:12402207-12402275	Chr2:12451772-12451840	Chr2:12540140-12540208	Chr2:12499629-12499697	Chr2:12357161-12357229	Chr2:12499296-12499364	Chr2:12487365-12487433	Chr2:12384989-12385057	Chr2:12396536-12396604	Chr2:12440214-12440282	Chr2:12354914-12354982	Chr2:12008384-12008451	Chr2:12048517-12048584	0	0
ONG0200280	Chr2:13877246-13880496	Chr2:13406103-13409353	Chr2:13699410-13702662	Chr2:13620886-13624138	Chr2:13449933-13453185	Chr2:13562730-13565980	Chr2:13585310-13588560	Chr2:13668197-13671447	Chr2:13633313-13636565	Chr2:13485127-13488377	Chr2:13618816-13621585	Chr2:13387925-13391173	Chr2:13285506-13288754	Chr2:13297305-13300555	Chr2:13342688-13345935	Chr2:13264850-13268096	Chr2:13024002-13025457	Chr2:13147752-13149207	Chr2:13756267-13759522	0
ONG0200290	Chr2:14014591-14014759	Chr2:13543460-13543628	Chr2:13831722-13831890	Chr2:13763181-13763349	Chr2:13587277-13587445	Chr2:13700079-13700247	Chr2:13722670-13722838	Chr2:13805514-13805682	Chr2:13765622-13765790	Chr2:13622471-13622639	Chr2:13714877-13715045	Chr2:13493254-13493422	Chr2:13390562-13390730	Chr2:13402285-13402453	Chr2:13447730-13447898	Chr2:13369763-13369931	Chr2:13110101-13110198	Chr2:13228962-13229058	Chr2:13872038-13872142	0
ONG0200300	Chr2:14132478-14132874	Chr2:13661356-13661752	Chr2:13949566-13949962	Chr2:13880929-13881326	Chr2:13705164-13705560	Chr2:13817857-13818253	Chr2:13840567-13840963	Chr2:13923452-13923849	Chr2:13883440-13883836	Chr2:13740319-13740715	Chr2:13868072-13868470	Chr2:13632606-13633002	Chr2:13529717-13530113	Chr2:13540574-13540970	Chr2:13586809-13587205	Chr2:13510702-13511098	Chr2:13228772-13229166	Chr2:13347840-13348235	0	Chr2:14391156-14391554
ONG0200310	Chr2:14326380-14326478	Chr2:13793811-13793909	Chr2:14114891-14114988	Chr2:14000715-14000813	Chr2:14309441-14309539	Chr2:13993741-13993839	Chr2:14011573-14011671	Chr2:14128681-14128779	Chr2:14077718-14077816	Chr2:13930570-13930668	Chr2:14300594-14300692	Chr2:13945058-13945156	Chr2:13781450-13781548	Chr2:13761365-13761463	Chr2:13952679-13952777	Chr2:13829017-13829115	Chr2:13345925-13346023	Chr2:13632603-13632701	Chr2:14163649-14163747	0
ONG0200320	0	0	0	0	0	0	0	0	0	0	0	Chr2:14415137-14465127	Chr2:14259025-14308918	Chr2:14239661-14289647	Chr2:14431128-14481115	Chr2:14297081-14347071	0	0	0	0
ONG0200330	Chr2:15575890-15576330	Chr2:15040395-15040835	Chr2:15479291-15479731	Chr2:15245429-15245869	Chr2:15559004-15559444	Chr2:15265611-15266051	Chr2:15255245-15255685	Chr2:15372359-15372803	Chr2:15318336-15318776	Chr2:15166283-15166723	Chr2:15671262-15671696	Chr2:14921276-14921716	Chr2:14765194-14765634	Chr2:14745186-14745626	Chr2:14936688-14937128	Chr2:14802763-14803203	Chr2:14967014-14967363	Chr2:14765027-14765376	Chr2:15251172-15251612	Chr2:15999549-16000104
ONG0200340	Chr2:15807472-15810700	Chr2:15271881-15275109	Chr2:15729027-15732255	Chr2:15494561-15497794	Chr2:15827542-15830770	Chr2:15544958-15548186	Chr2:15505087-15508315	Chr2:15615100-15618328	Chr2:15568107-15571335	Chr2:15394718-15397946	Chr2:15974293-15977524	Chr2:15118167-15121398	Chr2:14962044-14965275	Chr2:14941994-14945225	Chr2:15133569-15136800	Chr2:14999710-15002941	Chr2:14812235-14815448	Chr2:14928923-14932136	Chr2:15527860-15531093	Chr2:16326957-16330180	Chr2:18190203-18190458
ONG0200350	Chr2:16671941-16672244	Chr2:16136329-16136632	Chr2:16591881-16592184	Chr2:16358011-16358314	Chr2:16692012-16692315	Chr2:16420223-16420526	Chr2:16369736-16370039	Chr2:16479606-16479909	Chr2:16432351-16432654	Chr2:16251914-16252217	Chr2:16970169-16970472	Chr2:15656195-15656495	Chr2:15500224-15500524	Chr2:15480055-15480355	Chr2:15671568-15671868	Chr2:15537948-15538248	Chr2:14175649-14175952	Chr2:15575273-15575576	Chr2:16217310-16217613	Chr2:17379669-17379950
ONG0200360	Chr2:16690867-16691055	Chr2:16155231-16155419	Chr2:16610727-16610915	Chr2:16376862-16377050	Chr2:16710918-16711106	Chr2:16439086-16439274	Chr2:16388574-16388762	Chr2:16498496-16498684	Chr2:16451206-16451394	Chr2:16270750-16270938	Chr2:16989002-16989190	Chr2:15675334-15675522	Chr2:15519362-15519550	Chr2:15499196-15499384	Chr2:15690709-15690897	Chr2:15557087-15557275	0	0	Chr2:16236314-16236502	0
ONG0200370	Chr2:16987206-16987298	Chr2:16451559-16451651	Chr2:16918785-16918877	Chr2:16672806-16672897	Chr2:16967554-16967646	Chr2:16735444-16735536	Chr2:16684812-16684904	Chr2:16794875-16794967	Chr2:16747575-16747667	Chr2:16567074-16567166	Chr2:17259516-17259608	Chr2:15938859-15938951	Chr2:15783031-15783123	Chr2:15762782-15762874	Chr2:15954372-15954464	Chr2:15820360-15820452	Chr2:15572333-15572425	Chr2:15869151-15869243	Chr2:16538252-16538344	Chr2:17675631-17675723
ONG0200380	Chr2:17174169-17174484	Chr2:16638552-16638867	Chr2:17105660-17105975	Chr2:16859671-16859987	Chr2:17161709-17162024	Chr2:16922456-16922771	Chr2:16871830-16872145	Chr2:16981839-16982154	Chr2:16934530-16934845	Chr2:16753980-16754295	Chr2:17460036-17460351	Chr2:16132946-16133261	Chr2:15976982-15977297	Chr2:15956662-15956977	Chr2:16145460-16145775	Chr2:16016375-16016690	Chr2:15747737-15748052	Chr2:16044582-16044897	Chr2:16741955-16742269	Chr2:17886026-17886081
ONG0200390	Chr2:17268690-17268994	Chr2:16733090-16733394	Chr2:17200190-17200494	0	Chr2:17262021-17262325	Chr2:17016482-17016786	Chr2:16968105-16968409	Chr2:17076345-17076649	Chr2:17030776-17031080	Chr2:16848470-16848774	Chr2:17556310-17556614	Chr2:16233306-16233610	Chr2:16077315-16077619	Chr2:16056739-16057043	Chr2:16245799-16246103	Chr2:16135314-16135618	0	0	0	Chr2:18005724-18006028
ONG0200400	Chr2:18838520-18838642	Chr2:18311118-18311240	Chr2:18707945-18708067	Chr2:18452136-18452258	Chr2:18782112-18782234	Chr2:18541226-18541348	Chr2:18506679-18506801	Chr2:18610873-18610995	Chr2:18569312-18569434	Chr2:18349349-18349471	Chr2:19094031-19094153	Chr2:17792166-17792288	Chr2:17585668-17585790	Chr2:17576676-17576798	Chr2:17759989-17760111	Chr2:17690721-17690843	Chr2:17270980-17271102	Chr2:17669708-17669830	Chr2:18238985-18239107	0
ONG0200410	0	0	0	0	Chr2:18899373-18899504	0	0	0	0	0	0	Chr2:17909438-17909569	Chr2:17702936-17703067	Chr2:17693881-17694012	Chr2:17877260-17877391	0	Chr2:17418653-17418785	Chr2:17817324-17817456	Chr2:18387122-18387253	0
ONG0200420	Chr2:19250339-19250555	Chr2:19345143-19345359	Chr2:19111340-19111427	Chr2:18827941-18828157	Chr2:19327356-19327572	Chr2:19490146-19490233	Chr2:18860716-18860932	Chr2:19014093-19014180	Chr2:18923361-18923577	Chr2:18702797-18703013	Chr2:19448087-19448303	Chr2:18342388-18342604	Chr2:18131009-18131225	Chr2:18051437-18051652	Chr2:18305519-18305734	Chr2:18055571-18055786	Chr2:17717372-17717587	Chr2:18115686-18115901	Chr2:18731755-18731970	0
ONG0200430	Chr2:19277156-19277542	Chr2:19371953-19372339	Chr2:19137951-19138337	Chr2:18870980-18871366	Chr2:19354103-19354489	Chr2:19516762-19517148	Chr2:18895698-18896084	Chr2:19040704-19041090	Chr2:18958293-18958679	Chr2:18737788-18738174	Chr2:19483010-19483396	Chr2:18369151-18369537	Chr2:18157762-18158148	Chr2:18074643-18075029	Chr2:18328673-18329059	Chr2:18078794-18079180	Chr2:17748544-17748928	Chr2:18146823-18147209	Chr2:18754645-18754981	0
ONG0200440	0	0	0	0	0	0	Chr2:19581598-19582190	0	Chr2:19644253-19644845	0	0	0	0	Chr2:18616149-18616742	Chr2:18875828-18876420	0	0	0	0	0
ONG0200450	Chr2:20119190-20119263	Chr2:20213901-20213974	Chr2:19947711-19947784	Chr2:19716121-19716194	Chr2:20107261-20107334	Chr2:20326876-20326949	Chr2:19716295-19716366	0	Chr2:19778948-19779019	Chr2:19578580-19578651	Chr2:20316836-20316907	Chr2:19137040-19137111	Chr2:18910643-18910716	Chr2:18767860-18767931	Chr2:19027955-19028026	Chr2:18759964-18760037	0	0	0	Chr2:20807651-20807719
ONG0200460	Chr2:20751742-20751863	Chr2:20836699-20836820	Chr2:20577989-20578110	Chr2:20328047-20328168	Chr2:20665371-20665493	Chr2:20952560-20952681	Chr2:20337182-20337303	Chr2:20475569-20475690	Chr2:20399317-20399438	Chr2:20139029-20139151	Chr2:20877319-20877441	Chr2:19695841-19695963	Chr2:19468270-19468392	Chr2:19319322-19319444	Chr2:19571081-19571203	Chr2:19322374-19322496	Chr2:19036247-19036370	Chr2:19575563-19575686	0	0
ONG0200470	Chr2:20846340-20848374	Chr2:20931172-20933206	Chr2:20672457-20674494	Chr2:20422556-20424593	Chr2:20760697-20762736	Chr2:21047119-21049154	Chr2:20431785-20433818	Chr2:20570103-20572138	Chr2:20493922-20495957	Chr2:20234253-20236292	Chr2:20972535-20974574	Chr2:19791035-19793074	Chr2:19563472-19565511	Chr2:19414525-19416564	Chr2:19666269-19668307	Chr2:19437484-19439519	Chr2:19134088-19136083	Chr2:19673445-19675442	0	0
ONG0200480	0	0	0	0	Chr2:20953916-20954163	0	Chr2:20606770-20607017	0	0	Chr2:20427433-20427680	Chr2:21175445-21175692	Chr2:19984475-19984722	Chr2:19756610-19756857	Chr2:19607619-19607866	Chr2:19859452-19859699	Chr2:19631957-19632204	0	0	0	0
ONG0200490	Chr2:21449591-21449929	Chr2:21578285-21578623	Chr2:21305706-21306044	Chr2:21014454-21014791	Chr2:21371186-21371523	Chr2:21701327-21701667	Chr2:21045503-21045840	Chr2:21178670-21179008	Chr2:21109371-21109711	Chr2:20845218-20845555	Chr2:21600376-21600713	Chr2:20401748-20402085	Chr2:20173739-20174076	Chr2:20024405-20024742	Chr2:20294389-20294726	Chr2:20055033-20055370	Chr2:19774090-19774442	Chr2:20307256-20307608	Chr2:20770370-20770707	0
ONG0200500	Chr2:22419230-22419824	Chr2:22523955-22524549	Chr2:22327137-22327574	Chr2:21866179-21866773	Chr2:22233050-22233487	Chr2:22610794-22611388	Chr2:21997322-21997916	Chr2:22201191-22201628	Chr2:22112618-22113212	Chr2:21818379-21818973	Chr2:22519209-22519803	Chr2:21219859-21220453	Chr2:21009376-21009970	Chr2:20855720-20856314	Chr2:21104045-21104639	Chr2:20867133-20867727	Chr2:20620935-20621548	Chr2:21165139-21165752	Chr2:21686986-21687580	Chr2:23073454-23074064
ONG0200510	Chr2:22787143-22787243	Chr2:22901454-22901554	Chr2:22737721-22737821	Chr2:22275599-22275699	Chr2:22643447-22643547	Chr2:22973322-22973422	Chr2:22409447-22409547	Chr2:22611581-22611681	Chr2:22523519-22523619	Chr2:22182437-22182537	Chr2:22928218-22928318	Chr2:21605246-21605346	Chr2:21394733-21394833	Chr2:21239648-21239748	Chr2:21493598-21493698	Chr2:21246458-21246558	0	0	0	0
ONG0200520	Chr2:23326972-23327577	Chr2:23441202-23441808	Chr2:23277364-23277969	Chr2:22832395-22833004	Chr2:23183367-23183973	Chr2:23512932-23513538	Chr2:22981387-22981995	Chr2:23151461-23152067	Chr2:23077004-23077609	Chr2:22742657-22743264	Chr2:23485987-23486595	Chr2:22172033-22172640	0	Chr2:21847864-21848485	0	0	Chr2:21479013-21479623	Chr2:22034575-22035186	Chr2:22581986-22582595	Chr2:23988343-23988958
ONG0200530	Chr2:23652985-23653182	Chr2:23769398-23769595	Chr2:23603409-23603606	Chr2:23159268-23159465	Chr2:23509480-23509677	Chr2:23841865-23842062	Chr2:23308394-23308591	Chr2:23477573-23477770	Chr2:23414594-23414791	Chr2:23097794-23097991	Chr2:23812864-23813061	Chr2:22499524-22499721	Chr2:22245307-22245504	Chr2:22138778-22138975	Chr2:22352827-22353024	Chr2:22081071-22081268	Chr2:21785996-21786193	Chr2:22339844-22340041	0	Chr2:24318283-24318479
ONG0200540	0	0	0	0	0	0	0	0	0	0	0	Chr2:22667822-22669072	Chr2:22434400-22435650	Chr2:22322847-22324097	Chr2:22541587-22542837	Chr2:22270278-22271528	0	0	0	0
ONG0200550	0	Chr2:24560093-24560146	0	0	0	0	Chr2:23936730-23936783	0	0	0	0	Chr2:23158512-23158565	Chr2:22920992-22921045	Chr2:22808481-22808534	Chr2:23027994-23028047	Chr2:22764931-22764984	0	0	0	0
ONG0200560	Chr2:24382084-24382213	Chr2:24649894-24650023	Chr2:24327944-24328073	Chr2:23925671-23925801	Chr2:24262960-24263089	Chr2:24561463-24561592	Chr2:23987388-23987713	Chr2:24231097-24231226	Chr2:24160179-24160308	Chr2:23834830-23834959	Chr2:24476477-24476803	Chr2:23209161-23209486	Chr2:22971642-22971967	Chr2:22859135-22859460	Chr2:23078629-23078954	Chr2:22821552-22821877	Chr2:22448672-22448998	Chr2:23094107-23094433	0	Chr2:25091988-25092354
ONG0200570	0	0	0	0	0	0	0	0	0	0	0	0	Chr2:23440905-23440995	Chr2:23421991-23422071	Chr2:23629880-23629960	0	0	0	0	0
ONG0200580	0	0	0	0	0	0	0	0	0	0	0	0	Chr2:23450612-23450777	Chr2:23431741-23431906	Chr2:23639640-23639805	0	0	0	0	0
ONG0200590	Chr2:24825555-24829797	Chr2:25128126-25132422	Chr2:24786167-24790406	Chr2:24350077-24354316	Chr2:24780188-24780353	Chr2:25047233-25051475	Chr2:24504814-24504979	Chr2:24748298-24748463	Chr2:24645923-24650165	Chr2:24278408-24282647	Chr2:24944531-24948771	Chr2:23634284-23638522	Chr2:23469461-23469626	Chr2:23450859-23451024	Chr2:23658697-23658862	Chr2:23255145-23255310	0	Chr2:23575612-23575777	Chr2:23993540-23993701	Chr2:25560784-25560949
ONG0200600	Chr2:26589966-26590613	Chr2:26475409-26476056	Chr2:26480342-26480987	Chr2:25736754-25737401	Chr2:26164002-26164611	Chr2:26964687-26965336	Chr2:26056968-26057615	Chr2:26132197-26132806	Chr2:26017692-26018337	Chr2:26226138-26226783	Chr2:26845183-26845835	Chr2:25222937-25223588	Chr2:25074929-25075582	Chr2:24838616-24839267	Chr2:25354235-25354888	Chr2:24630540-24631187	0	0	0	0
ONG0200610	Chr2:26657006-26657984	Chr2:26539903-26540881	0	Chr2:25831420-25832398	Chr2:26235399-26236375	Chr2:27045731-27046710	Chr2:26140101-26141078	Chr2:26203602-26204578	0	Chr2:26289458-26290436	Chr2:26903959-26904936	Chr2:25281693-25282668	Chr2:25133913-25134888	Chr2:24897358-24898333	Chr2:25413055-25414032	Chr2:24732739-24733718	Chr2:24171463-24172432	Chr2:24822577-24823553	Chr2:25425699-25426675	0
ONG0200620	0	0	0	0	0	0	0	0	0	0	Chr2:26899767-26900383	Chr2:25277503-25278119	Chr2:25129720-25130336	Chr2:24893178-24893794	Chr2:25408866-25409482	0	0	0	0	0
ONG0200900	0	0	0	0	Chr2:26237099-26237169	0	0	Chr2:26205302-26205372	0	0	0	0	0	0	0	0	0	0	0	0
ONG0200630	Chr2:27486903-27487026	Chr2:27274802-27274925	Chr2:27311220-27311343	Chr2:26579972-26580095	Chr2:27012757-27012880	Chr2:27794288-27794411	Chr2:26890419-26890542	Chr2:26980921-26981044	Chr2:26860308-26860431	Chr2:27053862-27053985	Chr2:27667029-27667152	Chr2:26123039-26123162	Chr2:25986284-25986407	Chr2:25633198-25633321	Chr2:26200018-26200141	Chr2:25509175-25509298	Chr2:24921575-24921698	Chr2:25518066-25518189	Chr2:26366401-26366524	Chr2:27772333-27772456
ONG0200640	Chr2:27996892-27997122	Chr2:27781000-27781230	Chr2:27840275-27840505	Chr2:27099348-27099578	Chr2:27543896-27544126	Chr2:28313629-28313859	Chr2:27403894-27404124	Chr2:27512174-27512404	Chr2:27367204-27367434	Chr2:27573131-27573361	Chr2:28186421-28186654	Chr2:26640031-26640261	Chr2:26504094-26504324	Chr2:26161360-26161590	Chr2:26740229-26740459	Chr2:26032721-26032951	Chr2:25435358-25435587	Chr2:26040397-26040626	Chr2:26886736-26886965	Chr2:28267915-28268144
ONG0200650	0	Chr2:27952513-27952579	Chr2:28025110-28025176	Chr2:27266149-27266215	Chr2:27728878-27728944	Chr2:28480428-28480494	Chr2:27575261-27575327	Chr2:27697141-27697207	0	0	Chr2:28353219-28353285	Chr2:26821121-26821187	Chr2:26685189-26685255	Chr2:26342442-26342508	Chr2:26920675-26920741	Chr2:26214093-26214159	Chr2:25593979-25594045	Chr2:26199033-26199099	0	0
ONG0200660	Chr2:28254198-28254306	Chr2:28037288-28037396	Chr2:28110030-28110138	Chr2:27348392-27348500	Chr2:27813720-27813828	Chr2:28562740-28562848	Chr2:27660258-27660366	Chr2:27781987-27782095	Chr2:27651732-27651840	Chr2:27822151-27822259	Chr2:28435509-28435617	Chr2:26920280-26920388	Chr2:26784396-26784504	Chr2:26444923-26445031	Chr2:27019844-27019952	Chr2:26313566-26313674	Chr2:25675878-25675986	Chr2:26281108-26281216	Chr2:27180395-27180503	0
ONG0200670	Chr2:28416681-28416803	Chr2:28173529-28173651	Chr2:28246249-28246371	Chr2:27484643-27484765	Chr2:27949951-27950073	Chr2:28699552-28699674	Chr2:27796482-27796604	Chr2:27918205-27918327	Chr2:27814221-27814343	Chr2:27958379-27958501	Chr2:28571733-28571855	Chr2:27058849-27058971	Chr2:26922981-26923103	Chr2:26583469-26583591	Chr2:27159904-27160026	Chr2:26452401-26452523	Chr2:25812095-25812217	Chr2:26417426-26417548	Chr2:27338093-27338215	0
ONG0200680	Chr2:28733097-28733280	Chr2:28489982-28490165	Chr2:28566417-28566600	Chr2:27812337-27812520	Chr2:28270520-28270703	Chr2:29023238-29023421	Chr2:28113041-28113224	Chr2:28238810-28238993	Chr2:28122858-28123041	Chr2:28274915-28275098	Chr2:28888095-28888284	Chr2:27425211-27425394	Chr2:27304645-27304828	Chr2:26951602-26951785	Chr2:27525827-27526010	Chr2:26819972-26820155	Chr2:26107545-26107728	Chr2:26722476-26722659	Chr2:27642084-27642273	0
ONG0200690	Chr2:29350932-29351017	Chr2:29086222-29086307	Chr2:29162493-29162578	Chr2:28415766-28415851	Chr2:28866769-28866854	Chr2:29616139-29616224	Chr2:28705590-28705675	Chr2:28835068-28835153	Chr2:28689045-28689130	Chr2:28878614-28878699	Chr2:29493685-29493770	Chr2:27970572-27970657	Chr2:27850580-27850665	Chr2:27496697-27496782	Chr2:28071318-28071403	Chr2:27365700-27365785	Chr2:26636214-26636302	Chr2:27254712-27254800	Chr2:28262952-28263096	Chr2:29509964-29510187
ONG0200700	Chr2:29446723-29447196	Chr2:29181716-29182203	Chr2:29258009-29258496	Chr2:28511215-28511695	Chr2:28962248-28962735	Chr2:29711674-29712161	Chr2:28801816-28802303	Chr2:28930563-28931050	Chr2:28784519-28785006	Chr2:28974788-28975268	Chr2:29589691-29590171	Chr2:28084704-28085184	Chr2:27964556-27965036	Chr2:27610597-27611077	Chr2:28185381-28185861	Chr2:27479775-27480255	Chr2:26749582-26750062,Chr2:30326152-30326632	Chr2:27368258-27368738,Chr2:30965834-30966314	Chr2:28386203-28386683	0
ONG0200710	Chr2:29523771-29524052	Chr2:29260074-29260352	Chr2:29336377-29336655	Chr2:28586982-28587261	Chr2:29040617-29040896	Chr2:29790041-29790319	Chr2:28880185-28880463	Chr2:29008929-29009208	Chr2:28862869-28863147	Chr2:29050590-29050868	Chr2:29665429-29665707	Chr2:28147418-28147696	Chr2:28027182-28027460	Chr2:27673244-27673522	Chr2:28248155-28248433	Chr2:27542617-27542895	Chr2:26812336-26812615	Chr2:27431253-27431532	Chr2:28511454-28511733	0
ONG0200720	Chr2:30074615-30074763	Chr2:29744296-29744444	Chr2:29820096-29820244	Chr2:29083489-29083637	Chr2:29524730-29524878	Chr2:30274349-30274497	Chr2:29364198-29364346	Chr2:29493107-29493255	Chr2:29347257-29347405	Chr2:29547265-29547413	Chr2:30161968-30162116	Chr2:28646295-28646443	Chr2:28526144-28526292	Chr2:28171824-28171972	Chr2:28747223-28747371	Chr2:28036453-28036601	Chr2:27241839-27241987	Chr2:27860780-27860928	Chr2:29086594-29086743	Chr2:30046831-30046977
ONG0200730	0	0	0	0	0	0	0	0	0	Chr2:29847659-29848037	Chr2:30453552-30453930	Chr2:28957381-28957759	Chr2:28837435-28837813	Chr2:28484324-28484703	Chr2:29041508-29041887	0	0	0	0	Chr2:30360397-30360774
ONG0200740	Chr2:30550404-30550492	Chr2:30227600-30227688	Chr2:30302850-30302938	Chr2:29553149-29553237	Chr2:30007733-30007821	Chr2:30757637-30757725	Chr2:29847766-29847854	Chr2:29976205-29976293	Chr2:29830537-29830625	Chr2:30036832-30036920	Chr2:30642773-30642862	Chr2:29146557-29146645	Chr2:29026592-29026680	Chr2:28671777-28671865	Chr2:29229940-29230028	Chr2:28537128-28537216	Chr2:27691786-27691874	Chr2:28310445-28310533	Chr2:29590195-29590283	Chr2:30504127-30504216	Chr2:34246914-34247000
ONG0200750	Chr2:30971996-30972249	Chr2:30647669-30647922	Chr2:30702074-30702327	Chr2:29974754-29975007	Chr2:30429384-30429637	Chr2:31179242-31179495	Chr2:30260441-30260693	Chr2:30387706-30387958	Chr2:30219856-30220107	Chr2:30420235-30420486	Chr2:31026031-31026283	Chr2:29535516-29535767	Chr2:29413338-29413589	Chr2:29074069-29074320	Chr2:29613984-29614235	Chr2:28931443-28931694	Chr2:28088485-28088738	Chr2:28704082-28704335	Chr2:29977207-29977459	0
ONG0200760	Chr2:31287222-31287347	Chr2:30961826-30961951	Chr2:31066090-31066215	Chr2:30278908-30279033	Chr2:30737833-30737958	Chr2:31553346-31553471	Chr2:30574727-30574852	Chr2:30702021-30702146	Chr2:30514231-30514356	Chr2:30733180-30733306	Chr2:31338952-31339078	Chr2:29858309-29858435	Chr2:29726338-29726464	Chr2:29372270-29372396	Chr2:29926990-29927116	Chr2:29250994-29251120	Chr2:28341065-28341190	Chr2:28974284-28974409	0	Chr2:31138381-31138504
ONG0200770	Chr2:31558574-31558799	Chr2:31230790-31231015	Chr2:31370670-31370895	Chr2:30555617-30555842	Chr2:31011420-31011645	Chr2:31836814-31837039	Chr2:30829723-30829948	Chr2:30977952-30978177	Chr2:30783205-30783430	Chr2:31010231-31010456	Chr2:31626620-31626845	Chr2:30146722-30146947	Chr2:30015700-30015925	Chr2:29660553-29660778	Chr2:30247700-30247925	Chr2:29539285-29539510	0	0	Chr2:30598116-30598341	0
ONG0200780	Chr2:32848311-32848391	Chr2:32525597-32525677	Chr2:32680571-32680651	Chr2:31838235-31838315	Chr2:32293137-32293217	Chr2:33097602-33097682	Chr2:32125849-32125929	Chr2:32272711-32272791	Chr2:32075613-32075693	Chr2:32288822-32288901	Chr2:32852414-32852494	Chr2:31386503-31386583	Chr2:31250801-31250881	Chr2:30909242-30909322	Chr2:31482682-31482762	Chr2:30818548-30818628	Chr2:29818632-29818712	Chr2:30457952-30458032	0	0
ONG0200790	Chr2:33927146-33927275	Chr2:33594731-33594860	Chr2:33758365-33758494	Chr2:32898588-32898717	Chr2:33367846-33367975	Chr2:34193152-34193281	Chr2:33208071-33208200	Chr2:33341879-33342008	Chr2:33144918-33145047	Chr2:33381152-33381281	Chr2:33920443-33920572	Chr2:32518458-32518587	Chr2:32383601-32383730	Chr2:32023953-32024082	Chr2:32615142-32615271	Chr2:31950299-31950428	0	0	Chr2:32892567-32892715	Chr2:33616836-33616973
ONG0200800	0	0	0	0	0	0	0	0	0	0	0	Chr2:32658446-32658571	Chr2:32523615-32523740	Chr2:32163970-32164095	Chr2:32755103-32755228	0	0	0	0	0
ONG0200810	Chr2:34465038-34465211	Chr2:34132564-34132737	Chr2:34295110-34295283	Chr2:33436343-33436516	Chr2:33897203-33897376	Chr2:34729341-34729514	Chr2:33745873-33746046	Chr2:33879609-33879782	Chr2:33681071-33681244	Chr2:33909408-33909582	Chr2:34444439-34444613	Chr2:33051242-33051416	Chr2:32916366-32916540	Chr2:32556750-32556924	Chr2:33147827-33148001	Chr2:32486982-32487156	Chr2:31313758-31313931	Chr2:31947034-31947207	Chr2:33556767-33556940	0
ONG0200820	Chr2:34607511-34607664	Chr2:34287904-34288057	Chr2:34437159-34437312	Chr2:33591713-33591866	Chr2:34052557-34052710	Chr2:34884699-34884852	Chr2:33901263-33901416	Chr2:34035019-34035172	Chr2:33836453-33836606	Chr2:34053571-34053724	Chr2:34588639-34588792	Chr2:33188857-33189010	Chr2:33053975-33054128	Chr2:32694334-32694487	Chr2:33285437-33285590	Chr2:32631116-32631269	Chr2:31451752-31451908	Chr2:32084833-32084989	Chr2:33765189-33765345	0
ONG0200830	Chr2:35227413-35227527	Chr2:34862024-34862134	Chr2:35005463-35005573	Chr2:34165559-34165669	Chr2:34626733-34626843	Chr2:35458773-35458883	Chr2:34475448-34475558	Chr2:34609190-34609300	Chr2:34367459-34367572	Chr2:34580949-34581062	Chr2:35119738-35119851	Chr2:33730299-33730412	Chr2:33595405-33595518	Chr2:33234963-33235076	Chr2:33826977-33827090	Chr2:33140804-33140917	Chr2:31992108-31992221	Chr2:32616219-32616332	0	0
ONG0200840	Chr2:35423600-35423835	Chr2:35039251-35039485	Chr2:35182381-35182615	Chr2:34342744-34342980	Chr2:34803986-34804222	Chr2:35636060-35636294	Chr2:34652725-34652961	Chr2:34786473-34786707	Chr2:34545070-34545305	Chr2:34760243-34760478	Chr2:35297345-35297585	Chr2:33880633-33880869	Chr2:33745741-33745977	Chr2:33385103-33385339	Chr2:33977352-33977588	Chr2:33291360-33291596	Chr2:32154305-32154542	Chr2:32777988-32778224	Chr2:34381240-34381476	0
ONG0200850	0	0	0	0	0	0	0	0	0	0	0	Chr2:34331867-34331982	Chr2:34194767-34194882	Chr2:33831693-33831808	Chr2:34426269-34426384	Chr2:33740386-33740501	0	0	0	0
ONG0200860	Chr2:37095449-37095544	Chr2:36714606-36714701	Chr2:36855740-36855835	Chr2:36046679-36046774	Chr2:36514780-36514875	Chr2:37351422-37351517	Chr2:36324197-36324292	Chr2:36474623-36474718	Chr2:36276816-36276911	Chr2:36481252-36481347	Chr2:37042470-37042565	Chr2:35679879-35679974	Chr2:35574904-35574999	Chr2:35151399-35151494	Chr2:35752854-35752949	Chr2:35061335-35061430	0	0	0	0
ONG0200870	Chr2:37129065-37129614	Chr2:36748365-36748914	Chr2:36889439-36889988	Chr2:36080467-36081016	Chr2:36548568-36549117	Chr2:37385034-37385583	Chr2:36357994-36358543	Chr2:36508379-36508928	Chr2:36310586-36311135	Chr2:36514950-36515499	Chr2:37076234-37076783	Chr2:35713496-35714045	Chr2:35608517-35609066	Chr2:35185080-35185629	Chr2:35786603-35787152	Chr2:35094897-35095446	Chr2:33785809-33786358	Chr2:34394051-34394600	Chr2:36166586-36167137	Chr2:36570701-36571258
ONG0200880	0	0	0	0	0	0	0	0	0	Chr2:36803597-36803869	0	Chr2:35990942-35991214	Chr2:35882204-35882476	Chr2:35458969-35459241	Chr2:36066960-36067232	Chr2:35416065-35416337	0	0	0	0
ONG0300010	Chr3:713937-714127	Chr3:719033-719223	Chr3:719336-719526	Chr3:697713-697903	Chr3:715359-715549	Chr3:721745-721935	Chr3:695679-695869	Chr3:657885-658075	Chr3:711357-711547	Chr3:726344-726534	Chr3:674740-674930	Chr3:701787-701977	Chr3:711367-711557	Chr3:707446-707636	Chr3:702173-702363	Chr3:698946-699136	Chr3:659971-660161	Chr3:608944-609134	Chr3:687728-687918	Chr3:863146-863336
ONG0300020	Chr3:1026116-1026240	Chr3:1031196-1031320	Chr3:1031097-1031221	Chr3:1009357-1009481	Chr3:1027081-1027205	Chr3:1033915-1034039	Chr3:998460-998584	Chr3:970053-970177	Chr3:1023076-1023200	Chr3:1029079-1029203	Chr3:973095-973219	Chr3:1035250-1035374	Chr3:1040116-1040240	Chr3:1025177-1025301	Chr3:1032533-1032657	Chr3:1008958-1009082	0	0	Chr3:980822-980946	0
ONG0300030	0	0	0	0	0	0	0	0	0	0	0	Chr3:2338904-2339147	Chr3:2315267-2315510	Chr3:2304945-2305188	Chr3:2342877-2343120	0	0	0	0	0
ONG0300040	Chr3:2684915-2685083	Chr3:2686636-2686804	Chr3:2649456-2649624	Chr3:2669838-2670006	Chr3:2669705-2669873	Chr3:2692760-2692928	Chr3:2653272-2653440	Chr3:2633567-2633735	Chr3:2696168-2696336	Chr3:2626155-2626323	Chr3:2631385-2631553	Chr3:2629727-2629895	Chr3:2606300-2606468	Chr3:2595598-2595766	Chr3:2638499-2638667	Chr3:2660179-2660347	Chr3:2488611-2488778	Chr3:2405213-2405380	Chr3:2615921-2616089	Chr3:2760624-2760792	Chr3:2495831-2496019
ONG0300050	Chr3:3125709-3125774	Chr3:3127504-3127569	Chr3:3090236-3090301	Chr3:3110581-3110646	Chr3:3110560-3110625	Chr3:3133585-3133650	0	Chr3:3074822-3074887	Chr3:3136974-3137039	Chr3:3067530-3067595	Chr3:3070785-3070850	Chr3:3080602-3080667	Chr3:3057304-3057369	Chr3:3046520-3046585	Chr3:3089580-3089645	Chr3:3100468-3100533	Chr3:2886269-2886321	Chr3:2803117-2803182	Chr3:3179985-3180048	0
ONG0300060	Chr3:3225922-3226026	Chr3:3227723-3227827	Chr3:3190448-3190552	Chr3:3210794-3210898	Chr3:3210774-3210878	Chr3:3233799-3233903	Chr3:3194121-3194225	Chr3:3175025-3175129	Chr3:3237189-3237293	Chr3:3166873-3166977	Chr3:3169484-3169588	Chr3:3197512-3197616	Chr3:3174180-3174284	Chr3:3163424-3163528	Chr3:3206476-3206580	Chr3:3217367-3217471	Chr3:2979964-2980068	Chr3:2896806-2896910	Chr3:3272270-3272374	Chr3:3274870-3274974	Chr3:3094061-3094163
ONG0300070	Chr3:3519107-3519190	Chr3:3501408-3501491	Chr3:3461073-3461156	Chr3:3481149-3481232	Chr3:3503964-3504047	Chr3:3526910-3526993	Chr3:3484513-3484596	Chr3:3445358-3445441	Chr3:3507840-3507923	Chr3:3434595-3434678	Chr3:3441952-3442035	Chr3:3478125-3478208	Chr3:3454711-3454794	Chr3:3443993-3444076	Chr3:3492915-3492998	Chr3:3498775-3498858	Chr3:3240828-3240911	0	Chr3:3549359-3549442	0
ONG0300080	Chr3:5083071-5085979	Chr3:5056782-5059690	Chr3:5021854-5024762	Chr3:5022614-5025521	Chr3:5062740-5065648	Chr3:5085181-5088089	Chr3:5049374-5052282	Chr3:5009788-5012697	Chr3:5141427-5144317	Chr3:5067361-5070249	Chr3:5040667-5043557	Chr3:5055212-5058092	Chr3:5062065-5064946	Chr3:5009442-5012361	Chr3:5067561-5070442	Chr3:5145235-5148148	Chr3:4708463-4711379	Chr3:4635818-4638731	Chr3:5285169-5295830	Chr3:5230683-5233599
ONG0300090	Chr3:5463418-5464783	Chr3:5437307-5438672	Chr3:5402320-5403685	Chr3:5402955-5404309	Chr3:5443481-5444835	Chr3:5465893-5467258	Chr3:5429719-5431084	Chr3:5390357-5391722	Chr3:5529043-5530455	Chr3:5448725-5450090	Chr3:5420769-5422134	Chr3:5417995-5419364	Chr3:5410934-5412299	Chr3:5359323-5360692	Chr3:5417499-5418868	Chr3:5511891-5513256	0	0	0	0
ONG0300100	Chr3:5864941-5865313	Chr3:5838575-5838947	Chr3:5803523-5803895	Chr3:5804211-5804583	Chr3:5844385-5844757	Chr3:5866786-5867158	Chr3:5831034-5831406	Chr3:5791631-5792003	Chr3:5933443-5933815	Chr3:5874913-5875285	Chr3:5836952-5837239	Chr3:5799547-5799919	Chr3:5787481-5787853	Chr3:5751426-5751798	Chr3:5808778-5809150	Chr3:5914414-5914786	Chr3:5437191-5437567	Chr3:5369155-5369531	Chr3:6044280-6044656	0
ONG0300110	Chr3:6285008-6285185	Chr3:6260316-6260493	Chr3:6220970-6221147	Chr3:6215131-6215308	Chr3:6262153-6262330	Chr3:6284540-6284717	Chr3:6244938-6245115	Chr3:6202728-6202905	Chr3:6344352-6344529	Chr3:6273131-6273308	Chr3:6236967-6237144	Chr3:6197172-6197349	Chr3:6188440-6188617	Chr3:6149116-6149293	Chr3:6205902-6206079	Chr3:6318832-6319009	Chr3:5837105-5837276	Chr3:5781747-5781918	Chr3:6501578-6501860	0
ONG0300120	Chr3:6777969-6778106	Chr3:6753244-6753381	Chr3:6713664-6713801	Chr3:6712702-6712835	Chr3:6716539-6716676	Chr3:6738766-6738903	Chr3:6738033-6738170	Chr3:6656727-6656864	Chr3:6842103-6842240	Chr3:6833862-6833999	Chr3:6796529-6796666	Chr3:6735105-6735241	Chr3:6671055-6671192	Chr3:6651135-6651271	Chr3:6708921-6709057	Chr3:6879595-6879732	Chr3:6305423-6305559	Chr3:6264782-6264917	Chr3:6981579-6981719	Chr3:6844397-6844509
ONG0300130	Chr3:6799143-6799298	Chr3:6774416-6774571	Chr3:6734839-6734994	Chr3:6733871-6734026	Chr3:6737634-6737790	Chr3:6759861-6760016	Chr3:6759208-6759363	Chr3:6677822-6677977	Chr3:6863278-6863433	Chr3:6855081-6855236	Chr3:6817716-6817871	Chr3:6759438-6759593	Chr3:6692226-6692381	Chr3:6675466-6675621	Chr3:6733253-6733408	Chr3:6900813-6900968	Chr3:6326589-6326744	Chr3:6285946-6286101	Chr3:7002817-7002972	0
ONG0300140	0	0	0	0	0	0	0	0	0	0	0	Chr3:7663794-7664183	0	Chr3:7578843-7579232	Chr3:7642108-7642497	0	0	0	0	0
ONG0300150	Chr3:8283017-8283516	Chr3:8299667-8300166	Chr3:8243105-8243604	Chr3:8102072-8102573	Chr3:8195822-8196321	Chr3:8217715-8218214	Chr3:8181558-8182057	Chr3:8164240-8164739	Chr3:8366488-8366988	Chr3:8141268-8141767	Chr3:8097704-8098204	Chr3:8136955-8137453	Chr3:8164504-8165003	Chr3:7956146-7956644	Chr3:8019273-8019771	Chr3:8277171-8277669	Chr3:7542672-7543226	Chr3:7499058-7499612	Chr3:8460410-8460964	0
ONG0300160	0	0	0	0	0	0	0	0	0	0	0	0	0	Chr3:10134062-10134730	Chr3:10197678-10198346	0	0	0	0	0
ONG0300170	Chr3:11276869-11281469	Chr3:11314731-11319331	Chr3:11204965-11209561	Chr3:11162707-11167305	Chr3:11149418-11153987	Chr3:11171069-11175670	Chr3:11133542-11138142	Chr3:11154237-11158837	Chr3:11488468-11493068	Chr3:11185342-11189057	Chr3:11123883-11127598	Chr3:11028035-11032729	Chr3:11126929-11131623	Chr3:10899827-10903540	Chr3:10958455-10962168	Chr3:11230415-11234128	Chr3:10341142-10344798	Chr3:10272260-10275925	Chr3:11537103-11553613	0
ONG0300180	0	0	0	0	0	0	0	0	0	0	0	0	0	Chr3:11361827-11361920	Chr3:11420680-11420773	Chr3:11700595-11700688	0	0	0	0
ONG0300190	0	0	0	0	0	0	0	0	0	0	0	0	0	Chr3:11539792-11540192	0	Chr3:11878801-11879201	0	0	0	0
ONG0300200	Chr3:12114845-12115072	Chr3:12155750-12155977	Chr3:12039357-12039584	Chr3:12000822-12001049	Chr3:12000097-12000324	Chr3:12009517-12009744	Chr3:11972291-11972518	Chr3:11988811-11989038	Chr3:12326660-12326887	Chr3:12014588-12014815	Chr3:11951288-11951515	Chr3:11872309-11872536	Chr3:11961102-11961329	Chr3:11666626-11666853	Chr3:11725308-11725535	Chr3:12012141-12012368	Chr3:11125685-11125911	Chr3:11056309-11056535	0	0
ONG0300210	Chr3:13497498-13497576	Chr3:13537755-13537833	Chr3:13427547-13427625	Chr3:13387867-13387945	Chr3:13383402-13383480	Chr3:13391471-13391549	Chr3:13354124-13354202	Chr3:13384815-13384893	Chr3:13714429-13714507	Chr3:13384794-13384872	Chr3:13307486-13307564	Chr3:13252757-13252835	Chr3:13337669-13337747	Chr3:13046987-13047065	Chr3:13104504-13104582	Chr3:13393853-13393931	0	0	0	0
ONG0300220	Chr3:13787236-13787477	Chr3:13812632-13812873	Chr3:13707970-13708211	Chr3:13660477-13660718	Chr3:13663783-13664024	Chr3:13674662-13674903	Chr3:13637301-13637542	Chr3:13665291-13665532	Chr3:13991146-13991387	Chr3:13677179-13677420	Chr3:13573609-13573850	Chr3:13530386-13530627	Chr3:13613002-13613243	Chr3:13323559-13323800	Chr3:13379915-13380156	Chr3:13669216-13669457	Chr3:12731565-12731815	Chr3:12666300-12666550	Chr3:14153444-14153694	Chr3:13883606-13883847	Chr3:15257867-15258110
ONG0300230	Chr3:14419267-14428289	Chr3:14442761-14451783	Chr3:14402313-14411334	Chr3:14353990-14363011	Chr3:14358557-14367586	Chr3:14327765-14336787	Chr3:14291685-14300707	Chr3:14351428-14360449	Chr3:14677219-14686243	Chr3:14331568-14340590	Chr3:14107833-14117109	Chr3:14093358-14102636	Chr3:14162332-14171610	Chr3:13640562-13649805	Chr3:13947623-13956901	Chr3:14286003-14295281	Chr3:12930225-12939506	Chr3:12860895-12870169	0	Chr3:14136028-14145283
ONG0300240	Chr3:14475311-14475435	Chr3:14498808-14498932	Chr3:14458353-14458477	Chr3:14410073-14410197	Chr3:14414605-14414729	Chr3:14396678-14396802	Chr3:14360607-14360731	Chr3:14407536-14407660	Chr3:14733309-14733433	Chr3:14400458-14400582	Chr3:14203177-14203302	Chr3:14171659-14171783	Chr3:14240658-14240782	Chr3:13710498-13710622	Chr3:14025962-14026086	Chr3:14364189-14364313	Chr3:12986360-12986484	Chr3:12917081-12917205	Chr3:14326725-14326848	Chr3:14205433-14205556
ONG0300250	Chr3:14714389-14714582	Chr3:14737985-14738178	Chr3:14702076-14702269	Chr3:14649019-14649212	Chr3:14658563-14658756	Chr3:14636044-14636237	Chr3:14599979-14600172	Chr3:14651057-14651250	Chr3:14972693-14972886	Chr3:14663298-14663491	Chr3:14466859-14467051	Chr3:14433108-14433300	Chr3:14505677-14505869	Chr3:13939809-13940001	Chr3:14291579-14291771	Chr3:14625518-14625710	Chr3:13189660-13189853	Chr3:13120654-13120847	Chr3:14551940-14552133	0
ONG0300260	0	0	0	0	0	0	0	0	0	0	Chr3:14614123-14616363	Chr3:14530647-14532886	Chr3:14603078-14605317	Chr3:14032598-14034837	Chr3:14389169-14391409	Chr3:14723427-14725668	0	0	0	0
ONG0300270	0	0	0	0	0	0	0	0	0	0	Chr3:14707790-14707872	Chr3:14605001-14605082	Chr3:14677327-14677408	Chr3:14106805-14106886	Chr3:14463455-14463536	Chr3:14797628-14797709	0	0	0	Chr3:14651789-14651870
ONG0300280	Chr3:15104877-15104961	Chr3:15136141-15136225	Chr3:15121460-15121544	Chr3:15021099-15021183	Chr3:15078039-15078123	Chr3:15011340-15011424	Chr3:14974909-14974993	Chr3:15016473-15016557	Chr3:15346249-15346333	Chr3:15035596-15035680	Chr3:14899542-14899626	Chr3:14797404-14797488	Chr3:14869566-14869650	Chr3:14298860-14298944	Chr3:14655831-14655915	Chr3:14989881-14989965	Chr3:13529705-13529789	Chr3:13460276-13460360	0	Chr3:15113769-15113853
ONG0300290	Chr3:15662799-15663029	Chr3:15700922-15701152	Chr3:15705141-15705371	Chr3:15585525-15585755	Chr3:15661083-15661312	Chr3:15606933-15607163	Chr3:15570607-15570837	Chr3:15581307-15581537	Chr3:15910888-15911118	Chr3:15632816-15633046	Chr3:15442613-15442843	Chr3:15368134-15368361	Chr3:15440736-15440963	Chr3:14869735-14869962	Chr3:15226493-15226720	Chr3:15561061-15561288	Chr3:14164602-14164845	Chr3:14129443-14129686	Chr3:15570740-15570983	0
ONG0300300	Chr3:16242305-16242357	Chr3:16292960-16293012	Chr3:16297037-16297089	Chr3:16176812-16176864	Chr3:16232123-16232175	Chr3:16206334-16206386	Chr3:16124555-16124607	Chr3:16179220-16179272	Chr3:16502381-16502433	Chr3:16160776-16160828	Chr3:15968512-15968564	Chr3:15910627-15910679	Chr3:16046687-16046739	Chr3:15448647-15448699	Chr3:15827339-15827391	Chr3:16163363-16163415	0	0	0	0
ONG0300310	Chr3:17117424-17117812	Chr3:17139687-17140075	Chr3:17154491-17154879	Chr3:17019037-17019427	Chr3:16991082-16991472	Chr3:17070403-17070791	Chr3:16974586-16974974	Chr3:17034053-17034443	Chr3:17360737-17361125	Chr3:16898750-16899138	Chr3:16707101-16707489	Chr3:16718248-16718636	Chr3:16896643-16897031	Chr3:16183070-16183458	Chr3:16597653-16598041	Chr3:16926574-16926962	Chr3:15505527-15505914	Chr3:15445473-15445860	Chr3:16908947-16909334	0
ONG0300320	Chr3:17458255-17459766	Chr3:17458601-17460113	Chr3:17495373-17496884	Chr3:17359448-17360961	Chr3:17332136-17333651	Chr3:17423313-17424824	Chr3:17327620-17329131	Chr3:17349533-17351045	Chr3:17670089-17671600	Chr3:17275279-17276790	Chr3:17027412-17028930	Chr3:17045997-17047509	Chr3:17262759-17264271	Chr3:16424275-16425787	Chr3:16984388-16985899	Chr3:17255046-17256558	Chr3:15851477-15852975	Chr3:15781918-15783416	Chr3:17269315-17276530	0
ONG0300330	Chr3:18711249-18711840	Chr3:18974465-18975056	Chr3:18721524-18722114	Chr3:18589973-18590565	Chr3:18552500-18553090	Chr3:18623902-18624493	Chr3:18529128-18529719	Chr3:18630794-18631385	Chr3:18896063-18896654	Chr3:18544936-18545528	Chr3:18256302-18256894	Chr3:18306949-18307534	Chr3:18456243-18456828	Chr3:17610582-17611167	Chr3:18242124-18242709	Chr3:18617320-18617905	Chr3:16944129-16944724	Chr3:16893228-16893824	Chr3:18575310-18575901	0
ONG0300340	Chr3:18911372-18915680	Chr3:19175252-19179560	Chr3:18917218-18921525	Chr3:18782489-18786795	Chr3:18753345-18757653	Chr3:18824707-18829015	Chr3:18729928-18734236	Chr3:18843520-18847826	Chr3:19096821-19101129	Chr3:18737422-18741728	Chr3:18448368-18452674	Chr3:18509847-18510173	Chr3:18658762-18663067	Chr3:17812832-17817150	Chr3:18444069-18448378	Chr3:18817482-18821772	Chr3:17169272-17173592	Chr3:17119413-17123730	Chr3:18838921-18839240	0
ONG0300350	Chr3:19290818-19291121	Chr3:19538100-19538403	Chr3:19296638-19296941	Chr3:19155960-19156263	Chr3:19116104-19116407	Chr3:19204123-19204426	Chr3:19109383-19109686	Chr3:19207872-19208173	Chr3:19500687-19500990	Chr3:19085256-19085559	Chr3:18795250-18795553	Chr3:18873762-18874065	Chr3:18991584-18991888	Chr3:18144724-18145028	Chr3:18777458-18777762	Chr3:19185648-19185952	Chr3:17504430-17504733	Chr3:17453846-17454149	Chr3:19211166-19211469	0
ONG0300360	0	0	0	0	0	0	0	0	0	0	0	0	Chr3:19443939-19444323	Chr3:18601243-18601627	Chr3:19234387-19234771	Chr3:19647386-19647770	0	0	0	0
ONG0300370	Chr3:21879300-21881019	Chr3:22384796-22386554	Chr3:21829122-21830842	Chr3:21668438-21670151	Chr3:21998545-22000302	Chr3:21504172-21505891	Chr3:21404854-21406573	Chr3:21822163-21823882	Chr3:22063208-22064967	Chr3:21739955-21741674	Chr3:21519444-21521163	0	Chr3:20954467-20956209	Chr3:19953448-19955190	Chr3:20735985-20737727	Chr3:21211389-21213131	Chr3:19669270-19671016	Chr3:19442643-19444389	Chr3:21645279-21647037	0
ONG0300380	0	0	0	0	0	0	0	0	0	0	0	0	Chr3:20977025-20977496	Chr3:19976009-19976480	Chr3:20758543-20759014	Chr3:21233948-21234419	0	0	0	0
ONG0300390	Chr3:22371970-22372025	Chr3:22908182-22908239	Chr3:22316115-22316172	Chr3:22158907-22158964	Chr3:22521938-22521995	Chr3:21994755-21994812	Chr3:21895565-21895622	Chr3:22221942-22221999	Chr3:22654786-22654843	Chr3:22273310-22273367	Chr3:22048460-22048517	Chr3:22205231-22205288	Chr3:21396569-21396626	Chr3:20378650-20378707	Chr3:21178206-21178263	Chr3:21653629-21653686	Chr3:20096027-20096084	Chr3:19861954-19862011	Chr3:22214282-22214339	0
ONG0300400	Chr3:22382052-22382435	Chr3:22918259-22918642	Chr3:22326197-22326580	Chr3:22168979-22169362	Chr3:22532015-22532398	Chr3:22004837-22005220	Chr3:21905647-21906030	Chr3:22232025-22232410	Chr3:22664873-22665256	Chr3:22283389-22283772	Chr3:22058540-22058923	Chr3:22215320-22215703	Chr3:21406675-21407052	Chr3:20388758-20389135	Chr3:21188312-21188689	Chr3:21663734-21664111	Chr3:20106137-20106499	Chr3:19872063-19872425	Chr3:22224387-22224758	0
ONG0300410	Chr3:23326629-23326730	Chr3:23975515-23975616	Chr3:23305392-23305493	0	Chr3:23589297-23589398	Chr3:22949758-22949859	Chr3:22849811-22849912	Chr3:23259656-23259757	Chr3:23696831-23696932	Chr3:23330944-23331045	Chr3:23087420-23087521	Chr3:23159183-23159284	Chr3:22235733-22235834	Chr3:21217958-21218059	Chr3:22017494-22017595	Chr3:22509505-22509606	Chr3:20941831-20941932	Chr3:20722301-20722402	Chr3:23224168-23224269	0
ONG0300420	Chr3:23460592-23460648	Chr3:24109764-24109820	Chr3:23440168-23440224	Chr3:23245155-23245211	Chr3:23723554-23723610	Chr3:23083996-23084052	Chr3:22984062-22984118	Chr3:23419101-23419157	Chr3:23831552-23831608	Chr3:23474902-23474958	Chr3:23231570-23231626	Chr3:23289356-23289412	Chr3:22365860-22365916	Chr3:21348188-21348244	Chr3:22151386-22151442	Chr3:22651564-22651620	0	0	0	0
ONG0300430	Chr3:23522810-23523007	Chr3:24171987-24172184	Chr3:23502374-23502571	Chr3:23307371-23307568	Chr3:23785781-23785978	Chr3:23146216-23146413	Chr3:23046283-23046480	Chr3:23481411-23481608	Chr3:23893768-23893965	Chr3:23536920-23537117	Chr3:23293593-23293790	Chr3:23370981-23371178	Chr3:22447783-22447980	Chr3:21430175-21430372	Chr3:22233728-22233925	Chr3:22746724-22746921	Chr3:21092909-21093106	Chr3:20863891-20864088	Chr3:23421001-23421198	Chr3:24682200-24682460
ONG0300440	Chr3:24245594-24245712	Chr3:24941074-24941192	Chr3:24246736-24246854	Chr3:24033907-24034025	Chr3:24554898-24555016	Chr3:23871718-23871836	Chr3:23771362-23771480	Chr3:24245608-24245726	Chr3:24620965-24621083	Chr3:24228090-24228208	Chr3:24002870-24002988	Chr3:24030936-24031054	Chr3:23107962-23108080	Chr3:22090236-22090354	Chr3:23096166-23096284	Chr3:23543258-23543376	Chr3:21780119-21780237	Chr3:21553213-21553331	Chr3:24356744-24356862	Chr3:25298214-25298332
ONG0300450	Chr3:24714866-24715026	Chr3:25448969-25449129	Chr3:24715609-24715769	Chr3:24501967-24502126	Chr3:25062991-25063151	Chr3:24334140-24334300	Chr3:24233839-24233999	Chr3:24635338-24635498	Chr3:25083455-25083615	Chr3:24682783-24682943	Chr3:24407767-24407927	Chr3:24412124-24412284	Chr3:23489126-23489286	Chr3:22471209-22471369	Chr3:23477343-23477503	Chr3:23909989-23910149	Chr3:22184588-22184748	Chr3:21925602-21925762	Chr3:24865815-24865976	Chr3:25780896-25781057
ONG0300460	Chr3:25439284-25439368	Chr3:26173760-26173844	Chr3:25435590-25435674	Chr3:25237942-25238026	Chr3:25793422-25793506	Chr3:25058549-25058633	Chr3:24958501-24958585	Chr3:25589005-25589089	Chr3:25803445-25803529	Chr3:25470224-25470308	Chr3:25195075-25195159	Chr3:24868359-24868443	Chr3:23946085-23946169	Chr3:22927455-22927539	Chr3:23933847-23933931	Chr3:24367218-24367302	Chr3:22818686-22818770	Chr3:22564176-22564260	0	0
ONG0300470	Chr3:26296276-26300472	Chr3:27030804-27034887	Chr3:26282691-26286887	Chr3:26094104-26098300	Chr3:26654318-26658514	Chr3:25915641-25919837	Chr3:25815818-25820014	Chr3:26380857-26385048	Chr3:26620110-26624306	Chr3:26216808-26221004	Chr3:25891560-25895756	Chr3:25600673-25604877	Chr3:24678548-24682744	Chr3:23658379-23662585	Chr3:24666070-24670269	Chr3:25129570-25133766	Chr3:23439643-23446815	Chr3:23161208-23168377	Chr3:26384871-26389061	0
ONG0300480	Chr3:26323470-26323552	Chr3:27057892-27057974	Chr3:26309600-26310281	Chr3:26121191-26121273	Chr3:26681546-26681628	Chr3:25942828-25942910	Chr3:25843013-25843095	Chr3:26408087-26408169	Chr3:26647312-26647394	Chr3:26244130-26244212	Chr3:25918833-25918915	Chr3:25627849-25627931	Chr3:24705750-24705832	Chr3:23685444-23685526	Chr3:24693413-24693495	Chr3:25156798-25156880	Chr3:23471905-23472133	Chr3:23193511-23193739	Chr3:26423944-26424176	Chr3:26973862-26974088
ONG0300490	Chr3:26767959-26768109	Chr3:27500835-27500985	Chr3:26742970-26743120	Chr3:26565833-26565983	Chr3:27106884-27107034	Chr3:26374563-26374713	Chr3:26274579-26274729	Chr3:26833989-26834139	Chr3:27080207-27080357	Chr3:26661491-26661641	Chr3:26467129-26467279	Chr3:26140883-26141033	Chr3:25218968-25219118	Chr3:24191569-24191719	Chr3:25206735-25206885	Chr3:25671465-25671615	Chr3:23841036-23841186	Chr3:23557745-23557891	0	0
ONG0300500	Chr3:27117648-27118044	Chr3:27850482-27850878	Chr3:27093188-27093584	Chr3:26915195-26915591	Chr3:27456764-27457160	Chr3:26724277-26724673	Chr3:26624329-26624725	Chr3:27183905-27184301	Chr3:27429957-27430353	Chr3:27011150-27011546	Chr3:26788733-26789129	Chr3:26482866-26483262	Chr3:25555776-25556172	Chr3:24528317-24528713	Chr3:25543803-25544199	Chr3:26008676-26009072	Chr3:24174997-24175393	Chr3:23891512-23891908	Chr3:27224799-27225195	Chr3:28105059-28105453
ONG0300510	0	0	0	0	0	0	0	0	0	Chr3:27077446-27077680	0	Chr3:26551380-26551615	Chr3:25624142-25624377	Chr3:24596593-24596828	Chr3:25612271-25612506	Chr3:26077147-26077382	0	0	0	0
ONG0300520	Chr3:27370272-27372798	Chr3:28098426-28100952	Chr3:27324763-27327278,WGGU01000089.1:154685-156803	Chr3:27153318-27155842	Chr3:27733340-27735863	Chr3:26972407-26974932	Chr3:26872322-26874845	Chr3:27422159-27424682	Chr3:27668092-27670610	Chr3:27237381-27239900	Chr3:27025425-27027946	Chr3:26704735-26707257	Chr3:25777579-25780102	Chr3:24749316-24751577	Chr3:25765570-25768094	Chr3:26230623-26233146	Chr3:24406121-24408642	Chr3:24118939-24121463	Chr3:27466852-27469372	0
ONG0300530	Chr3:27842350-27846209	Chr3:28588369-28592278	Chr3:27813741-27817646	Chr3:27611801-27615695	Chr3:28193409-28197325	Chr3:27430972-27434878	0	Chr3:27908927-27912834	Chr3:28129066-28132972	Chr3:27736643-27740506	Chr3:27524223-27528085	Chr3:27202027-27205934	Chr3:26274400-26278290	Chr3:25246070-25249977	Chr3:26263318-26267175	Chr3:26726106-26730014	0	0	0	0
ONG0300540	Chr3:28422961-28425832	Chr3:29176201-29179072	Chr3:28331544-28334401	Chr3:28096757-28099628	Chr3:28781329-28784200	Chr3:27915973-27918844	Chr3:27837095-27839966	Chr3:28394022-28396893	Chr3:28614469-28617340	Chr3:28228265-28231136	Chr3:28085162-28088035	Chr3:27693965-27696836	Chr3:26760400-26763271	Chr3:25730761-25733632	Chr3:27037697-27037844	Chr3:27478817-27481667	Chr3:25192945-25195794	Chr3:24937713-24940559	0	0
ONG0300550	Chr3:28490713-28491833	Chr3:29243973-29245093	Chr3:28467605-28467785	Chr3:28175672-28176791	Chr3:28849113-28850231	Chr3:27983719-27984839	Chr3:27904550-27905670	Chr3:28461808-28462928	Chr3:28693510-28694626	Chr3:28296024-28297144	Chr3:28190509-28191630	Chr3:27761607-27762728	Chr3:26828176-26829297	Chr3:25798495-25799611	Chr3:27170977-27172098	Chr3:27568299-27568638	Chr3:25294832-25295951	Chr3:25038947-25040066	Chr3:28468847-28469970	Chr3:29642893-29644283
ONG0300560	Chr3:28493412-28493831	Chr3:29246672-29247091	WGGU01000090.1:182799-183218	Chr3:28178371-28178790	Chr3:28851810-28852229	Chr3:27986418-27986837	Chr3:27907249-27907668	Chr3:28464507-28464926	Chr3:28696205-28696624	Chr3:28298724-28299143	0	Chr3:27764308-27764727	Chr3:26830877-26831296	Chr3:25801190-25801609	0	0	0	0	0	0
ONG0300570	Chr3:28699543-28701590	Chr3:29452936-29454983	Chr3:28683797-28685844	Chr3:28384750-28386797	Chr3:29056429-29058479	Chr3:28192537-28194584	Chr3:28111861-28113911	Chr3:28670674-28672721	Chr3:28902688-28904735	Chr3:28513371-28515418	Chr3:28399916-28401964	Chr3:27970805-27972852	Chr3:27036610-27038657	Chr3:26007121-26009168	Chr3:27411660-27413707	Chr3:27781053-27783100	Chr3:25494916-25496977	Chr3:25239758-25241816	Chr3:28733965-28736018	Chr3:29875901-29877949
ONG0300580	Chr3:28960791-28961149	Chr3:29714220-29714581	Chr3:28944917-28945275	Chr3:28645887-28646245	Chr3:29321725-29322083	Chr3:28453747-28454107	0	Chr3:28932030-28932388	Chr3:29163909-29164267	Chr3:28774627-28774985	Chr3:28661214-28661572	Chr3:28232030-28232388	Chr3:27297832-27298190	Chr3:26268182-26268540	Chr3:27673028-27673386	Chr3:28044994-28045352	0	0	Chr3:28979390-28979758	0
ONG0300590	Chr3:28980562-28980640	Chr3:29734009-29734087	Chr3:28964675-28964753	Chr3:28665651-28665729	Chr3:29341499-29341577	Chr3:28473518-28473596	Chr3:28402955-28403117	Chr3:28951808-28951886	Chr3:29183675-29183753	Chr3:28794401-28794479	Chr3:28680987-28681065	Chr3:28251790-28251868	Chr3:27317616-27317694	Chr3:26287953-26288031	Chr3:27692772-27692850	Chr3:28064767-28064845	0	0	0	0
ONG0300600	Chr3:29212924-29213788	Chr3:29962062-29962926	Chr3:29202616-29203480	Chr3:28905768-28906634	Chr3:29573200-29574075	Chr3:28705196-28706060	Chr3:28634037-28634901	Chr3:29190650-29191514	Chr3:29419184-29420048	Chr3:29033136-29034000	Chr3:28919693-28920557	Chr3:28490491-28491355	Chr3:27556375-27557239	Chr3:26522026-26522890	Chr3:27931632-27932496	Chr3:28303664-28304528	Chr3:26051564-26052428	Chr3:25794578-25795442	Chr3:29272712-29273571	0
ONG0300610	Chr3:29299793-29300157	Chr3:30048968-30049330	Chr3:29279402-29279764	Chr3:28981246-28981630	Chr3:29648707-29649091	Chr3:28780648-28781032	Chr3:28709517-28709901	Chr3:29274302-29274670	Chr3:29505446-29505830	Chr3:29119258-29119572	Chr3:28991531-28991845	Chr3:28577354-28577718	Chr3:27643191-27643555	Chr3:26607004-26607368	Chr3:28017588-28017952	Chr3:28389831-28390195	Chr3:26126037-26126399	Chr3:25869054-25869416	Chr3:29361718-29362082	Chr3:30607412-30607786
ONG0300620	Chr3:29448991-29449204	Chr3:30198260-30198473	Chr3:29428643-29428856	Chr3:29127292-29127505	Chr3:29786220-29786435	Chr3:28918124-28918337	Chr3:28846973-28847186	Chr3:29418670-29418883	Chr3:29642893-29643106	Chr3:29278489-29278702	Chr3:29145680-29145893	Chr3:28721715-28721928	Chr3:27787644-27787857	Chr3:26744307-26744520	Chr3:28162029-28162249	Chr3:28534213-28534426	Chr3:26250965-26251178	Chr3:25998035-25998248	0	0
ONG0300630	Chr3:29620006-29620381	Chr3:30369336-30369711	Chr3:29635516-29635891	Chr3:29308905-29309280	Chr3:29994507-29994882	Chr3:29100116-29100493	Chr3:29029091-29029466	Chr3:29625652-29626028	Chr3:29814100-29814475	Chr3:29461106-29461481	Chr3:29328237-29328612	Chr3:28872117-28872492	Chr3:27938173-27938548	Chr3:26894869-26895244	Chr3:28312607-28312982	Chr3:28699366-28699741	Chr3:26388205-26388581	Chr3:26131654-26132030	Chr3:29626460-29626837	0
ONG0300640	Chr3:29766354-29766590	Chr3:30515729-30515965	Chr3:29781882-29782118	Chr3:29455254-29455490	Chr3:30140836-30141072	Chr3:29238128-29238364	Chr3:29175475-29175711	Chr3:29772235-29772471	Chr3:29980107-29980343	Chr3:29607551-29607787	Chr3:29474692-29474928	Chr3:29068679-29068915	Chr3:28134851-28135087	Chr3:27087852-27088088	Chr3:28508783-28509019	Chr3:28879108-28879344	Chr3:26569067-26569302	Chr3:26315855-26316090	Chr3:29833564-29833800	0
ONG0300650	Chr3:29982819-29983011	Chr3:30740090-30740282	Chr3:30006094-30006286	Chr3:29679380-29679572	Chr3:30365184-30365376	Chr3:29462440-29462632	Chr3:29399719-29399911	Chr3:29996608-29996800	Chr3:30204355-30204547	Chr3:29831859-29832051	Chr3:29698957-29699149	Chr3:29285423-29285615	Chr3:28351257-28351449	Chr3:27304014-27304206	Chr3:28725195-28725387	Chr3:29110899-29111091	Chr3:26772670-26772862	Chr3:26521474-26521666	Chr3:30034871-30035079	Chr3:31317693-31317881
ONG0300660	Chr3:30290573-30294139	Chr3:31052980-31056538	Chr3:30313424-30316984	Chr3:29986700-29990251	Chr3:30664498-30668069	Chr3:29769407-29772968	Chr3:29785464-29789016	Chr3:30337959-30340624	Chr3:30511592-30515163	Chr3:30131204-30134775	Chr3:29998181-30001751	Chr3:29591691-29595267	Chr3:28657697-28661273	Chr3:27609595-27613171	Chr3:29031420-29034998	Chr3:29460947-29464523	Chr3:27088146-27091434	Chr3:26844875-26848163	Chr3:30344998-30348291	0
ONG0300670	Chr3:31197036-31197538	Chr3:31906714-31907216	Chr3:31146079-31146581	Chr3:30794815-30795317	Chr3:31496447-31496949	Chr3:30634886-30635388	Chr3:30637586-30638088	Chr3:31126926-31127428	Chr3:31347094-31347596	Chr3:30963175-30963677	Chr3:30829773-30830275	Chr3:30380548-30381051	Chr3:29456446-29456949	Chr3:28400501-28401004	Chr3:29825175-29825678	Chr3:30254809-30255311	Chr3:27893567-27894068	Chr3:27641489-27641990	Chr3:31276607-31277106	Chr3:32481479-32482001
ONG0300680	Chr3:31407031-31407458	Chr3:32120796-32121225	Chr3:31356242-31356669	Chr3:31004774-31005201	Chr3:31716040-31716466	Chr3:30844922-30845349	Chr3:30848305-30848734	Chr3:31337368-31337796	Chr3:31566647-31567073	Chr3:31182619-31183045	Chr3:31053201-31053627	Chr3:30605836-30606263	Chr3:29681680-29682107	Chr3:28625587-28626014	Chr3:30050324-30050751	Chr3:30472247-30472673	Chr3:28107078-28107505	Chr3:27854620-27855047	Chr3:31495134-31495563	0
ONG0300690	Chr3:31487683-31488780	Chr3:32202081-32203176	Chr3:31436839-31437936	Chr3:31085421-31086518	Chr3:31796582-31797677	Chr3:30925567-30926664	Chr3:30929670-30930765	Chr3:31418089-31419186	Chr3:31646999-31648094	Chr3:31263060-31264155	Chr3:31133616-31134711	Chr3:30686424-30687521	Chr3:29762294-29763391	Chr3:28705895-28706992	Chr3:30130883-30131980	Chr3:30552955-30554052	Chr3:28188013-28189108	Chr3:27935437-27936532	Chr3:31575660-31576755	0
ONG0300700	Chr3:31498767-31500322	Chr3:32213136-32214687	Chr3:31447913-31449467	Chr3:31096508-31098065	Chr3:31807653-31809207	Chr3:30936643-30938198	Chr3:30940719-30942264	Chr3:31429740-31430740	Chr3:31658064-31659601	Chr3:31274126-31275663	Chr3:31144675-31146212	Chr3:30697505-30699060	Chr3:29773373-29774928	Chr3:28716972-28718527	Chr3:30141951-30143506	Chr3:30564035-30565590	Chr3:28198957-28200504	Chr3:27946440-27951086	Chr3:31586587-31588132	Chr3:32834955-32842867	Chr3:33186070-33186783
ONG0300710	Chr3:31662395-31663965	Chr3:32378084-32379683	Chr3:31611500-31613070	0	0	Chr3:31100207-31101778	0	Chr3:31592767-31594337	0	0	0	Chr3:30860972-30862542	Chr3:29937329-29938899	Chr3:28876877-28878447	Chr3:30305570-30307140	Chr3:30727677-30729247	0	0	0	0
ONG0300720	Chr3:31670190-31670614	Chr3:32385908-32386332	Chr3:31619319-31619744	0	0	Chr3:31108044-31108468	0	Chr3:31600608-31601032	0	0	0	Chr3:30868739-30869163	Chr3:29945182-29945606	Chr3:28884672-28885096	Chr3:30313375-30313799	Chr3:30735473-30735897	0	0	0	0
ONG0300730	Chr3:32123690-32123888	Chr3:32845613-32845811	Chr3:32039328-32039526	Chr3:31681719-31681917	Chr3:32336275-32336474	Chr3:31495430-31495628	Chr3:31550842-31551040	Chr3:31938940-31939136	Chr3:32186491-32186690	Chr3:31803558-31803757	Chr3:31673093-31673292	Chr3:31207441-31207637	Chr3:30284403-30284599	Chr3:29221013-29221209	Chr3:30652001-30652197	Chr3:31162008-31162206	Chr3:28702393-28702592	Chr3:28452694-28452893	0	0
ONG0300740	Chr3:32529118-32529284	Chr3:33282084-33282249	Chr3:32473995-32474160	Chr3:32143487-32143652	Chr3:32734716-32734881	Chr3:31924405-31924570	Chr3:32003323-32003489	Chr3:32384526-32384691	Chr3:32587525-32587690	Chr3:32201980-32202145	Chr3:32071486-32071651	Chr3:31624825-31624991	Chr3:30701675-30701841	Chr3:29637983-29638149	Chr3:31068440-31068606	Chr3:31594824-31594989	Chr3:29162484-29162650	Chr3:28913532-28913698	Chr3:32625131-32625296	0
ONG0300750	0	0	0	0	0	0	0	0	0	0	0	Chr3:32014512-32014658	Chr3:31090427-31090573	Chr3:30018636-30018782	Chr3:31427323-31427464	0	0	0	0	0
ONG0300760	Chr3:33339102-33339281	Chr3:34127351-34127530	Chr3:33289108-33289287	Chr3:32958249-32958428	Chr3:33511534-33511713	Chr3:32768165-32768345	Chr3:32811720-32811899	Chr3:33200109-33200288	Chr3:33433775-33433954	Chr3:32978715-32978894	Chr3:32847527-32847706	Chr3:32352963-32353061	Chr3:31417275-31417373	Chr3:30356867-30356965	Chr3:31765816-31765914	Chr3:32297597-32297695	Chr3:29837131-29837302	Chr3:29591705-29591877	Chr3:33299941-33300112	0
ONG0300770	0	0	0	0	0	0	0	0	0	0	0	Chr3:32532973-32533069	Chr3:31597417-31597513	Chr3:30536872-30536968	Chr3:31945936-31946032	Chr3:32477765-32477861	0	0	0	0
ONG0300780	Chr3:33682252-33682571	Chr3:34470669-34470988	Chr3:33566115-33566434	Chr3:33274079-33274400	Chr3:33816421-33816742	Chr3:33095247-33095568	Chr3:33116485-33116806	Chr3:33516279-33516600	Chr3:33751114-33751435	Chr3:33270560-33270879	Chr3:33143288-33143608	Chr3:32643834-32644155	Chr3:31708253-31708574	Chr3:30647517-30647838	Chr3:32056619-32056940	Chr3:32588577-32588898	Chr3:30119434-30119750	Chr3:29873940-29874257	Chr3:33643703-33644026	0
ONG0300790	Chr3:34269506-34269971	Chr3:35057888-35058353	Chr3:34081512-34081972	Chr3:33786395-33786864	Chr3:34325932-34326401	Chr3:33595592-33596061	Chr3:33626013-33626482	Chr3:34025879-34026348	Chr3:34260692-34261157	Chr3:33730095-33730564	Chr3:33607695-33608164	Chr3:33213431-33213896	Chr3:32277347-32277812	Chr3:31129072-31129537	Chr3:32625747-32626212	Chr3:33174917-33175382	Chr3:30563204-30563673	Chr3:30319574-30320043	0	0
ONG0300800	Chr3:34492297-34492587	Chr3:35280804-35281094	Chr3:34285374-34285664	Chr3:33993564-33993855	Chr3:34532189-34532481	Chr3:33801856-33802148	Chr3:33832273-33832565	Chr3:34232136-34232428	Chr3:34483540-34483830	Chr3:33935026-33935316	Chr3:33810497-33810787	Chr3:33436302-33436593	Chr3:32500142-32500433	Chr3:31351887-31352178	Chr3:32844380-32844671	Chr3:33397858-33398149	Chr3:30748164-30748526	Chr3:30504443-30504805	Chr3:34334271-34334633	0
ONG0300810	Chr3:34949329-34949817	Chr3:35737792-35738280	Chr3:34746675-34747167	Chr3:34467797-34468289	Chr3:34999696-35000192	Chr3:34269374-34269867	Chr3:34299797-34300290	Chr3:34699770-34700262	Chr3:34944092-34944580	Chr3:34375119-34375600	Chr3:34246474-34246955	Chr3:33890863-33891329	Chr3:32954108-32954574	Chr3:31805052-31805518	Chr3:33298463-33298929	Chr3:33851758-33852223	Chr3:31189294-31189784	Chr3:30937939-30938430	Chr3:34791413-34791903	0
ONG0300820	0	0	0	0	0	0	0	0	0	0	0	0	0	Chr3:31809345-31821856	0	Chr3:33856050-33867430	0	0	0	0
ONG0300830	Chr3:35459176-35459710	Chr3:36259149-36259681	Chr3:35261429-35261961	Chr3:34983581-34984113	Chr3:35509671-35510203	Chr3:34778698-34779230	Chr3:34809254-34809786	Chr3:35214833-35215365	Chr3:35454577-35455109	Chr3:34900364-34900896	Chr3:34771626-34772158	Chr3:34377966-34378498	Chr3:33441234-33441766	Chr3:32304362-32304894	Chr3:33785557-33786089	Chr3:34349918-34350450	Chr3:31655988-31656519	Chr3:31395239-31395770	Chr3:35244949-35245480	0
ONG0300840	Chr3:35778431-35778566	Chr3:36578443-36578578	Chr3:35573591-35573726	Chr3:35302940-35303075	Chr3:35829963-35830097	Chr3:35098074-35098209	Chr3:35128664-35128799	Chr3:35534079-35534214	Chr3:35773353-35773487	Chr3:35255705-35255840	Chr3:35130498-35130633	Chr3:34722781-34722916	Chr3:33791913-33792048	Chr3:32649165-32649300	Chr3:34130465-34130600	Chr3:34694798-34694933	Chr3:31975317-31975452	Chr3:31706671-31706806	0	0
ONG0300850	0	0	0	0	0	Chr3:35528462-35528656	Chr3:35559135-35559329	0	0	0	0	Chr3:35137537-35137731	Chr3:34206511-34206705	Chr3:33063346-33063540	Chr3:34545079-34545273	Chr3:35109430-35109624	0	0	0	0
ONG0300860	Chr3:36271780-36271960	Chr3:37066376-37066556	Chr3:36059191-36059371	Chr3:35789575-35789755	Chr3:36305993-36306173	Chr3:35574262-35574443	Chr3:35604933-35605114	Chr3:36022000-36022174	Chr3:36249520-36249699	Chr3:35720135-35720316	Chr3:35596545-35596726	Chr3:35183337-35183518	Chr3:34252314-34252495	Chr3:33109145-33109326	Chr3:34590875-34591056	Chr3:35155226-35155407	Chr3:32436035-32436216	Chr3:32168201-32168382	Chr3:36082091-36082269	0
ONG0300870	0	0	0	0	0	0	0	0	0	0	0	Chr3:35322536-35322716	Chr3:34391385-34391565	Chr3:33248029-33248209	Chr3:34729835-34730015	Chr3:35294285-35294465	Chr3:32584637-32584817	Chr3:32306400-32306580	0	0
ONG0300880	Chr3:36714281-36714562	Chr3:37503364-37503645	Chr3:36496922-36497203	Chr3:36227335-36227629	Chr3:36743840-36744134	Chr3:36007935-36008216	Chr3:36038655-36038936	Chr3:36464402-36464695	Chr3:36687257-36687538	Chr3:36141926-36142207	Chr3:36018422-36018703	Chr3:35614779-35615060	Chr3:34683445-34683726	Chr3:33539901-33540182	Chr3:35021745-35022026	Chr3:35586350-35586631	Chr3:32873031-32873312	Chr3:32594947-32595228	Chr3:36521451-36521732	Chr3:37752422-37752701	Chr3:38241311-38241680
ONG0300890	Chr3:36784148-36784269	Chr3:37577526-37577647	Chr3:36566845-36566966	Chr3:36300806-36300927	Chr3:36813765-36813886	Chr3:36077874-36077995	Chr3:36108610-36108731	Chr3:36534275-36534396	Chr3:36757164-36757285	Chr3:36217039-36217124	Chr3:36093504-36093589	Chr3:35684748-35684869	Chr3:34753456-34753577	Chr3:33609737-33609858	Chr3:35091602-35091723	Chr3:35656218-35656339	0	0	Chr3:36597230-36597351	Chr3:37825136-37825418
ONG0300900	Chr3:36978224-36978332	Chr3:37771620-37771728	Chr3:36761057-36761165	Chr3:36494932-36495040	Chr3:37007992-37008100	Chr3:36272111-36272219	Chr3:36302885-36302993	Chr3:36728521-36728629	Chr3:36951299-36951407	Chr3:36396490-36396598	Chr3:36272972-36273080	Chr3:35878924-35879032	Chr3:34947602-34947710	Chr3:33803749-33803857	Chr3:35285740-35285848	Chr3:35850462-35850570	0	0	0	0
ONG0300910	Chr3:37462620-37463057	Chr3:38262920-38263359	Chr3:37238024-37238464	Chr3:37022997-37023437	Chr3:37499356-37499796	Chr3:36763509-36763940	Chr3:36794276-36794707	Chr3:37219891-37220322	Chr3:37442629-37443066	Chr3:36874550-36874990	Chr3:36751090-36751530	Chr3:36416668-36417105	Chr3:35493925-35494362	Chr3:34349829-34350266	Chr3:35831668-35832105	Chr3:36367810-36368247	Chr3:33586902-33587342	Chr3:33306935-33307375	Chr3:37294317-37294757	0
ONG0300920	0	0	0	0	0	0	0	0	0	Chr3:37009673-37010630	Chr3:36885480-36886435	Chr3:36555886-36556843	Chr3:35633738-35634695	Chr3:34489011-34489968	Chr3:35970903-35971860	Chr3:36507021-36507978	Chr3:33730722-33731761	Chr3:33450120-33451158	Chr3:37492455-37493502	0
ONG0300930	0	Chr3:38418271-38418435	0	Chr3:37178376-37178540	Chr3:37654685-37654849	Chr3:36918801-36918965	Chr3:36949589-36949753	Chr3:37375202-37375366	0	Chr3:37018511-37018675	Chr3:36894316-36894480	Chr3:36564725-36564889	Chr3:35642576-35642740	Chr3:34497849-34498013	Chr3:35979741-35979905	Chr3:36515859-36516023	Chr3:33739549-33739732	Chr3:33458936-33459119	Chr3:37501284-37501467	Chr3:38599681-38599863
ONG0300940	0	0	0	0	0	Chr3:37871242-37871813	Chr3:37902481-37903052	Chr3:38328105-38328676	0	0	Chr3:37907901-37908469	Chr3:37496025-37496596	Chr3:36575063-36575634	Chr3:35423584-35424155	Chr3:36912167-36912738	Chr3:37444715-37445286	0	0	0	0
ONG0300950	Chr3:38698357-38700561	Chr3:39514192-39516539	Chr3:38525508-38527710	Chr3:38331077-38333408	Chr3:38752443-38754775	Chr3:38044838-38047277	Chr3:38076066-38078505	Chr3:38501709-38504134	Chr3:38700451-38702892	Chr3:38255735-38257923	Chr3:38106716-38108904	Chr3:37673868-37676307	Chr3:36748833-36751272	Chr3:35602629-35604832	Chr3:37085902-37088341	Chr3:37618465-37620904	Chr3:34779713-34782243	Chr3:34496244-34498797	Chr3:38566121-38568607	0
ONG0300960	Chr3:39043091-39044640	Chr3:39875244-39876795	Chr3:38851691-38853241	Chr3:38688036-38689587	Chr3:39108982-39110532	Chr3:38372226-38373784	Chr3:38403500-38405050	Chr3:38828901-38830451	Chr3:39027651-39029201	Chr3:38574080-38575630	Chr3:38432976-38434526	Chr3:38005325-38006875	Chr3:37080293-37081843	Chr3:35999446-36000996	Chr3:37417423-37418973	Chr3:37950184-37951734	Chr3:35143428-35145027	Chr3:34859662-34861244	Chr3:38952173-38953721	0
ONG0300970	Chr3:39300700-39300782	Chr3:40117152-40117234	Chr3:39092030-39092112	Chr3:38930139-38930221	Chr3:39351354-39351436	Chr3:38612658-38612740	Chr3:38643945-38644027	Chr3:39069174-39069256	Chr3:39268018-39268100	Chr3:38820367-38820449	Chr3:38690590-38690672	Chr3:38287530-38287612	Chr3:37338332-37338414	Chr3:36269736-36269818	Chr3:37724327-37724409	Chr3:38232731-38232813	Chr3:35390097-35390179	Chr3:35105822-35105904	0	0
ONG0300980	Chr3:39369037-39369540	Chr3:40204991-40205590	Chr3:39163810-39164313	Chr3:39002039-39002543	Chr3:39423287-39423791	Chr3:38684537-38685040	Chr3:38715816-38716319	Chr3:39141141-39141644	Chr3:39355864-39356463	Chr3:38888085-38888588	Chr3:38755380-38755842	Chr3:38349020-38349523	Chr3:37406666-37407169	Chr3:36338083-36338586	Chr3:37792671-37793174	Chr3:38301058-38301561	Chr3:35455423-35456022	Chr3:35171080-35171680	Chr3:39306170-39306772	Chr3:40210706-40211383
ONG0400010	0	0	0	0	0	0	0	0	0	0	0	0	0	Chr4:260708-260983	0	0	0	0	0	0
ONG0400020	0	0	0	0	0	0	0	0	0	0	0	0	0	Chr4:645298-645566	0	0	0	0	0	0
ONG0400030	0	0	0	0	0	0	0	0	0	Chr4:1788253-1788444	0	0	0	Chr4:1859919-1860110	Chr4:1688087-1688278	Chr4:1846935-1847126	Chr4:1727078-1727260	Chr4:1663325-1663501	Chr4:1771962-1772144	Chr4:1591336-1591518
ONG0400040	0	0	0	0	0	0	0	0	0	Chr4:2043036-2044891	0	0	Chr4:1761135-1762987	Chr4:2085216-2086799	Chr4:1885519-1887373	Chr4:2055358-2057203	Chr4:1829690-1831544	Chr4:1765964-1767818	0	0
ONG0400050	Chr4:1977859-1978347	0	0	0	0	0	0	0	0	0	0	0	0	Chr4:2296380-2296876	0	0	0	0	0	0
ONG0400060	Chr4:4388333-4388570	Chr4:4546099-4546336	Chr4:4250577-4250814	Chr4:3624821-3625130	Chr4:4003621-4003866	Chr4:3966900-3967137	Chr4:3691846-3692251	Chr4:4167138-4167386	Chr4:4166456-4166693	Chr4:4113965-4114201	Chr4:3957600-3957909	0	Chr4:3958773-3959010	Chr4:4322635-4322872	Chr4:3882019-3882256	Chr4:4085332-4085569	0	0	Chr4:3477233-3477378	0
ONG0400070	0	0	0	Chr4:3824439-3824583	Chr4:4122069-4122208	0	Chr4:3814456-3814600	Chr4:4292630-4292769	0	Chr4:4202760-4202898	Chr4:4160464-4160607	Chr4:4101304-4101442	Chr4:4068611-4068749	Chr4:4455717-4455855	Chr4:3986851-3986989	Chr4:4190620-4190758	Chr4:3234695-3234833	0	Chr4:3616548-3616686	Chr4:3748454-3748591
ONG0400080	Chr4:4835467-4835579	Chr4:4905893-4906005	Chr4:4696756-4696868	Chr4:4179050-4179162	Chr4:4533714-4533826	Chr4:4500126-4500238	Chr4:4235686-4235798	Chr4:4650634-4650746	Chr4:4690960-4691073	Chr4:4585758-4585870	Chr4:4441990-4442102	Chr4:4368261-4368373	Chr4:4357113-4357225	Chr4:4760263-4760375	Chr4:4293049-4293161	Chr4:4448240-4448352	Chr4:3471029-3471141	Chr4:3495898-3496010	Chr4:4080464-4080576	0
ONG0400090	0	Chr4:4985544-4985734	Chr4:4765109-4765299	Chr4:4267784-4267974	0	Chr4:4572756-4572946	0	Chr4:4725114-4725304	0	Chr4:4660150-4660340	0	Chr4:4456259-4456449	Chr4:4476207-4476397,Chr4:4418113-4418239	Chr4:4868021-4868211	Chr4:4377385-4377575	Chr4:4528893-4529083	0	0	0	Chr4:4125084-4125275,Chr4:4248569-4248759
ONG0400100	Chr4:4942937-4943129	Chr4:5101642-5101834	Chr4:4880734-4880926	Chr4:4421751-4421943	Chr4:4621579-4621769	Chr4:4678423-4678615	Chr4:4310100-4310292	Chr4:4830828-4831020	Chr4:4797800-4797992	Chr4:4765823-4766015	Chr4:4549466-4549658	Chr4:4611428-4611620	Chr4:4476207-4476397	Chr4:5023315-5023507	Chr4:4433107-4433299,Chr4:4377385-4377575	Chr4:4634577-4634769	0	0	0	Chr4:4125084-4125275,Chr4:4248569-4248759
ONG0400110	Chr4:5175216-5176129	Chr4:5345100-5346013	Chr4:5111727-5112640	Chr4:4592674-4593387	Chr4:4828813-4829683	Chr4:4922217-4923130	Chr4:4537317-4538209	Chr4:5071623-5072545	Chr4:5025333-5026248	Chr4:4966884-4967776	Chr4:4792890-4793803	Chr4:4782570-4783283	Chr4:4750268-4751136,Chr4:4799801-4800669,Chr4:4849334-4850202	Chr4:5209194-5210109	Chr4:4681338-4682253	Chr4:4809592-4810484	0	0	Chr4:4577497-4578377	0
ONG0400120	0	0	0	Chr4:4676510-4676628	Chr4:4910964-4911082	0	0	Chr4:5148473-5148532	0	0	0	Chr4:4866475-4866593	Chr4:4920698-4920816	Chr4:5288643-5288761	Chr4:4760793-4760911	0	Chr4:3898862-3898980	Chr4:3866983-3867101	Chr4:4620931-4621049	0
ONG0400130	0	0	0	Chr4:5083594-5083822	Chr4:5319998-5320263	0	0	0	0	0	0	Chr4:5272434-5272662	0	Chr4:5697562-5697790	Chr4:5169733-5169961	0	0	0	0	0
ONG0400140	Chr4:5726424-5730108	0	Chr4:5811848-5815532	Chr4:5094163-5094425	Chr4:5330567-5330829	Chr4:5522320-5526005	0	0	Chr4:5579172-5582856	0	Chr4:5401159-5404844	Chr4:5283003-5283265	0	Chr4:5708131-5708393	Chr4:5180302-5180564	0	Chr4:4265150-4272310	Chr4:4239629-4246791	Chr4:5185349-5189068	Chr4:5222255-5225960
ONG0400150	0	0	0	0	0	0	0	0	0	0	0	Chr4:6976328-6976701	Chr4:7245059-7245432	Chr4:7579836-7580209	Chr4:7075162-7075535	0	Chr4:6052102-6052467	Chr4:5997921-5998285	0	Chr4:7277064-7277435
ONG0400160	0	0	0	0	0	0	0	0	0	0	0	0	0	Chr4:8273735-8273787	Chr4:7760841-7760893	0	0	0	0	0
ONG0400170	0	0	0	0	0	0	0	0	0	0	0	0	0	Chr4:9089919-9210431	Chr4:8618549-8740726	0	0	0	0	0
ONG0400180	Chr4:10004289-10006272	Chr4:10468394-10470373	Chr4:9838655-9840638,Chr4:14922925-14924905	Chr4:9839502-9841480	Chr4:9533094-9535072	Chr4:9870107-9872085	Chr4:8958527-8960505	Chr4:10057723-10059700	Chr4:10526719-10528698	Chr4:9139597-9141572	Chr4:9083031-9085008	Chr4:8676829-8678804,Chr4:12422513-12424495	Chr4:8944869-8946844,Chr4:12575864-12577847	Chr4:9696643-9698620,4:13994075-13996055	Chr4:9217987-9219963,Chr4:13417198-13419179	Chr4:9189162-9191136	Chr4:7694464-7696431	Chr4:7631920-7633886	Chr4:8387568-8389541	0
ONG0400190	Chr4:10104595-10105012	Chr4:10603820-10604230	Chr4:9944005-9944422,WGGU01000128.1:128164-128574	Chr4:9979860-9980270	Chr4:9673146-9673556	Chr4:10010646-10011056	Chr4:9053547-9053964	Chr4:10198952-10199362	Chr4:10670618-10671028	0	0	0	0	Chr4:9860603-9861020	Chr4:9378066-9378483	0	0	0	Chr4:8481956-8482388	0
ONG0400200	0	0	0	0	0	0	0	0	0	0	0	0	0	Chr4:10202996-10203048	Chr4:9741719-9741771	0	0	0	0	0
ONG0400210	Chr4:11702984-11703951	Chr4:11936042-11937009	Chr4:11877566-11878533	Chr4:11821987-11822955	Chr4:11571311-11572277	Chr4:11903015-11903982	Chr4:10697882-10698849	Chr4:12065546-12066513	Chr4:12532469-12533436	Chr4:10428805-10429772	Chr4:10848300-10849267	Chr4:9637756-9638723	Chr4:9816249-9817216	Chr4:10954265-10955232	Chr4:10542511-10543478	Chr4:10022800-10023767	Chr4:8998752-8999719	Chr4:8767858-8768825	Chr4:9402957-9403924	Chr4:8210445-8211412
ONG0400220	Chr4:11791578-11792684	Chr4:12029450-12030607	Chr4:11970553-11971710	Chr4:11915265-11916420	Chr4:11664683-11665838	Chr4:11996360-11997517	Chr4:10786477-10787581	Chr4:12158989-12160144	Chr4:12640040-12641197	Chr4:10546457-10547614	Chr4:10965896-10967051	Chr4:9700883-9702066	Chr4:9876688-9877871	Chr4:11051079-11052269	Chr4:10670394-10671584	Chr4:10082745-10083928	Chr4:9058645-9059833	Chr4:8827745-8828933	Chr4:9463098-9464286	0
ONG0400230	0	Chr4:12115722-12115821	Chr4:12056681-12056780	Chr4:12001790-12001889	Chr4:11751327-11751426	Chr4:12082924-12083023	0	Chr4:12244474-12244573	Chr4:12729856-12729955	Chr4:10615327-10615426	Chr4:11034771-11034870	Chr4:9728272-9728371	Chr4:9904155-9904254	Chr4:11089924-11090023	Chr4:10709252-10709351	Chr4:10110175-10110274	Chr4:9085895-9085994	Chr4:8855096-8855195	Chr4:9490743-9490842	0
ONG0400240	Chr4:11834991-11835134	Chr4:12194506-12194649	Chr4:12134920-12135063	Chr4:12080294-12080437	Chr4:11830182-11830325	Chr4:12161655-12161798	Chr4:10834810-10834953	Chr4:12323248-12323391	Chr4:12829883-12830026	Chr4:10685381-10685524	Chr4:11104458-11104601	Chr4:9785113-9785256	Chr4:9949745-9949888	Chr4:11138738-11138877	Chr4:10758127-10758266	Chr4:10156043-10156186	Chr4:9130303-9130446	Chr4:8899504-8899647	Chr4:9552226-9552369	Chr4:8052385-8052528
ONG0400250	Chr4:11846071-11846203	Chr4:12205567-12205699	Chr4:12145974-12146106	Chr4:12091355-12091487	Chr4:11841243-11841375	Chr4:12172715-12172847	Chr4:10845885-10846017	Chr4:12334309-12334441	Chr4:12840944-12841076	Chr4:10716792-10716924	Chr4:11135872-11136004	Chr4:9796200-9796332	Chr4:9960822-9960954	Chr4:11177818-11177950	Chr4:10797213-10797345	Chr4:10167120-10167252	Chr4:9141290-9141422	Chr4:8910491-8910623	Chr4:9563347-9563479	0
ONG0400260	Chr4:11949228-11949623	Chr4:12301693-12302088	Chr4:12241931-12242323	Chr4:12187459-12187851	Chr4:11937396-11937791	Chr4:12268836-12269231	Chr4:10949039-10949434	Chr4:12430401-12430796	Chr4:12937094-12937489	Chr4:10808736-10809131	Chr4:11231221-11231616	Chr4:9907621-9908003	Chr4:10065419-10065814	Chr4:11287260-11287642	Chr4:10906536-10906918	Chr4:10271765-10272160	Chr4:9233314-9233709	Chr4:9002529-9002924	Chr4:9669001-9669411	Chr4:7960211-7960491
ONG0400270	0	0	0	0	0	0	0	0	0	0	0	0	0	Chr4:11642147-11642253	0	0	0	0	0	0
ONG0400280	Chr4:12301574-12301679	Chr4:12710687-12710792	Chr4:12636755-12636860	Chr4:12595520-12595625	Chr4:12346299-12346404	Chr4:12677734-12677839	Chr4:11301540-11301645	Chr4:12839544-12839649	Chr4:13378766-13378871	Chr4:11208092-11208197	Chr4:11633801-11633906	Chr4:10268513-10268618	Chr4:10431583-10431688	Chr4:11658912-11659017	Chr4:11235228-11235333	Chr4:10611640-10611745	Chr4:9558640-9558745	Chr4:9327906-9328011	0	Chr4:10457493-10457598
ONG0400290	Chr4:12564758-12565156	Chr4:12979935-12980286	Chr4:12899350-12899748	Chr4:12864452-12864803	Chr4:12615512-12615863	Chr4:12946881-12947232	Chr4:11565096-11565494	Chr4:13108894-13109245	Chr4:13645740-13646091	Chr4:11545004-11545355	Chr4:11965433-11965784	Chr4:10495607-10495955	Chr4:10658660-10659008	Chr4:11938383-11938731	Chr4:11460096-11460446	Chr4:10838304-10838654	Chr4:9766568-9766920	Chr4:9535886-9536238	Chr4:10167865-10168217	0
ONG0400300	0	0	0	0	0	0	0	0	0	0	0	Chr4:10991629-10992187	Chr4:11145557-11146115	Chr4:12545825-12546384	Chr4:11960533-11961091	Chr4:11334395-11334954	0	0	0	0
ONG0400310	Chr4:14255393-14255726	Chr4:14515106-14515366	Chr4:14587367-14587700	Chr4:14575622-14575885	Chr4:14337490-14337753	Chr4:14665082-14665345	Chr4:13408298-13408561	Chr4:14850541-14850874	Chr4:15390031-15390294	Chr4:13315156-13315817	Chr4:13736445-13736697	Chr4:12048498-12048832	Chr4:12202123-12202457	Chr4:13605600-13605934	Chr4:13023666-13024000	Chr4:12414456-12414789	Chr4:11577218-11577570	Chr4:11338898-11339231	0	0
ONG0400320	Chr4:14441029-14441360	Chr4:14703788-14704118	Chr4:14774899-14775230	Chr4:14745534-14745865	Chr4:14520283-14520614	Chr4:14834993-14835324	Chr4:13578133-13578464	Chr4:15077826-15078157	Chr4:15567763-15568094	Chr4:13515514-13515765	Chr4:13925708-13925959	Chr4:12274403-12274734	Chr4:12427875-12428206	Chr4:13831559-13831890	Chr4:13254419-13254750	Chr4:12602930-12603261	Chr4:11730980-11732111	Chr4:11504814-11505945	0	Chr4:12972553-12972881
ONG0400330	Chr4:14785931-14786241	Chr4:15082053-15082363	Chr4:15119152-15119462	Chr4:15114715-15115025	Chr4:14889427-14889737	Chr4:15203984-15204294	Chr4:13947171-13947481	Chr4:15447028-15447338	Chr4:15905749-15906060	Chr4:13864655-13864965	Chr4:14273473-14273783	Chr4:12640239-12640549	Chr4:12793288-12793598	Chr4:14214487-14214797	Chr4:13715042-13715352	Chr4:12968274-12968584	Chr4:12135761-12136045	Chr4:12162485-12162769	0	Chr4:13627114-13627424
ONG0400340	0	0	0	0	0	0	0	0	0	0	0	0	0	Chr4:14377128-14377423	Chr4:14024820-14025115	0	0	0	0	0
ONG0400350	Chr4:15306144-15306227	0	Chr4:15639224-15639307	Chr4:15642596-15642679	Chr4:15417773-15417856	Chr4:15732166-15732249	Chr4:14384006-14384089	Chr4:15975369-15975452	Chr4:16341280-16341363	Chr4:14358831-14358914	Chr4:14766639-14766722	Chr4:13199456-13199539	Chr4:13352157-13352240	Chr4:14723495-14723578	Chr4:14741117-14741200	Chr4:13439595-13439678	0	0	Chr4:13394930-13395012	0
ONG0400360	0	0	0	0	0	0	0	0	0	0	0	0	0	Chr4:15261544-15261834	0	0	0	0	0	0
ONG0400370	Chr4:16738391-16738835	Chr4:16623950-16624403	Chr4:17124724-17125168	Chr4:17058563-17059011	Chr4:16927471-16927915	Chr4:17165423-17165867	Chr4:15113467-15113911	Chr4:17390285-17390729	Chr4:17400795-17401248	Chr4:14948601-14949049	Chr4:15355794-15356242	Chr4:14685796-14686244	Chr4:14796096-14796540	Chr4:16289090-16289534	Chr4:15805410-15805854	Chr4:14861925-14862369	Chr4:13413585-13414032	Chr4:13411776-13412223	Chr4:14646704-14646803	Chr4:15039490-15039937
ONG0400380	Chr4:16926929-16927675	Chr4:16788984-16789730	Chr4:17312582-17313319	Chr4:17227303-17228049	Chr4:17116177-17116923	Chr4:17354134-17354880	Chr4:15302195-15302941	Chr4:17579005-17579751	Chr4:17565786-17566532	Chr4:15146900-15147623	Chr4:15511480-15512226	Chr4:14897518-14898264	Chr4:14984827-14985573	Chr4:16491744-16492490	Chr4:15994083-15994795	Chr4:15050634-15051380	Chr4:13643454-13644199	Chr4:13661119-13661864	0	0
ONG0400390	Chr4:17961634-17961790	Chr4:17333045-17333201	Chr4:17913866-17914022	Chr4:17736925-17737081	Chr4:17724183-17724339	Chr4:17883973-17884129	Chr4:15825106-15825262	Chr4:18183337-18183493	Chr4:18109934-18110090	Chr4:16043656-16043812	Chr4:16063969-16064138	Chr4:15416182-15416338	Chr4:15590562-15590718	Chr4:17012622-17012778	Chr4:16599769-16599925	Chr4:15646195-15646364	Chr4:14080526-14080696	Chr4:14120085-14120255	Chr4:15574019-15574199	Chr4:15899200-15899371
ONG0400400	Chr4:18190886-18190989	Chr4:17574668-17574771	Chr4:18135922-18136025	Chr4:17966054-17966157	Chr4:17954020-17954123	Chr4:18113726-18113829,Chr4:18142464-18142567,Chr4:18171203-18171306	Chr4:16054672-16054775	Chr4:18412937-18413040	Chr4:18332073-18332176	Chr4:16273727-16273830	0	Chr4:15645970-15646073	Chr4:15820242-15820345	Chr4:17242540-17242643	Chr4:16829467-16829570	0	Chr4:14301173-14301276	0	0	Chr4:16093135-16098424
ONG0400410	0	0	0	Chr4:18419705-18419971	0	Chr4:18638001-18638268	0	Chr4:18880299-18880566	0	Chr4:16729518-16729771	0	Chr4:16101824-16102090	Chr4:16283436-16283702	Chr4:17708198-17708464	Chr4:17296109-17296376	Chr4:16364933-16365200	0	0	0	0
ONG0400420	0	0	0	Chr4:18494951-18495034	0	0	0	0	0	Chr4:16804876-16804959	0	0	Chr4:16358753-16358836	Chr4:17783567-17783650	0	Chr4:16455366-16455449	0	0	0	0
ONG0400430	Chr4:19622346-19622479	Chr4:18952702-18952835	Chr4:19621022-19621155	Chr4:18872118-18872251	Chr4:19492904-19493037	Chr4:19251656-19251789	Chr4:17552101-17552234	Chr4:19485637-19485770	Chr4:19843731-19843864	Chr4:17201035-17201168	Chr4:17630450-17630583	Chr4:16605257-16605390	Chr4:16774019-16774152	Chr4:18179269-18179402	Chr4:17901065-17901198	Chr4:16851339-16851472	0	0	0	Chr4:17070910-17071043
ONG0400440	0	0	0	0	0	Chr4:19277934-19278252	0	Chr4:19511913-19512231	0	Chr4:17227310-17227628	Chr4:17656261-17656579	Chr4:16631532-16631850	Chr4:16800295-16800613	Chr4:18205545-18205863	Chr4:17927456-17927774	Chr4:16877616-16877934	0	0	0	0
ONG0400450	Chr4:20103600-20103687	Chr4:18466744-18466831	Chr4:19117341-19117428	Chr4:19367713-19367800	Chr4:19006863-19006950	Chr4:19724961-19725048	Chr4:17066063-17066150	Chr4:19972429-19972516	Chr4:19358163-19358250	Chr4:17679982-17680069	Chr4:18107708-18107795	Chr4:17084967-17085054	Chr4:17253202-17253289	Chr4:18661679-18661766	Chr4:18302240-18302327	Chr4:17324719-17324806	Chr4:15826445-15826532	Chr4:15871942-15872029	0	Chr4:17519200-17519284
ONG0400460	Chr4:20158208-20158541	Chr4:19747732-19748063	Chr4:20414440-20414771	Chr4:19422037-19422371	Chr4:20286385-20286716	Chr4:19779974-19780307	Chr4:18312255-18312587	Chr4:20027496-20027801	Chr4:20636843-20637174	Chr4:17735065-17735398	Chr4:18162806-18163139	Chr4:17137132-17137465	Chr4:17308260-17308593	Chr4:18716742-18717075	Chr4:18357300-18357633	Chr4:17379794-17380127	Chr4:15874924-15875258	Chr4:15920335-15920669	Chr4:17127422-17127756	0
ONG0400470	Chr4:20176085-20176210	Chr4:19765615-19765738	Chr4:20432324-20432447	Chr4:19439914-19440039	Chr4:20304269-20304392	Chr4:19797885-19798010	Chr4:18330140-18330263	Chr4:20045376-20045501	Chr4:20654729-20654852	Chr4:17752972-17753097	Chr4:18180724-18180849	Chr4:17155039-17155164	Chr4:17326168-17326293	Chr4:18734648-18734773	Chr4:18414807-18414907	Chr4:17397701-17397826	Chr4:15895774-15895951	Chr4:15941184-15941361	Chr4:17159164-17159341	0
ONG0400480	Chr4:20407080-20407406	Chr4:20021240-20021563	Chr4:20671193-20671519	Chr4:19704181-19704504	Chr4:20548685-20549008	Chr4:20046946-20047269	Chr4:18542830-18543153	Chr4:20295051-20295374	Chr4:20893664-20893987	Chr4:18002378-18002701	Chr4:18425505-18425828	Chr4:17404258-17404581	Chr4:17575491-17575814	Chr4:18983652-18983975	Chr4:18662734-18663057	Chr4:17646977-17647300	Chr4:16166982-16167302	Chr4:16218453-16218773	Chr4:17438592-17438912	Chr4:17838456-17838667
ONG0400490	Chr4:20505622-20510781	Chr4:20120146-20125300	Chr4:20769692-20774844	Chr4:19838002-19843138	Chr4:20683135-20688272	Chr4:20160899-20166026	Chr4:18656497-18661633	Chr4:20411626-20416763	Chr4:21007585-21012722	Chr4:18116280-18121416	Chr4:18539349-18544463	Chr4:17518168-17523305	Chr4:17689323-17694460	Chr4:19097950-19103087	Chr4:18776702-18781839	Chr4:17760581-17765719	Chr4:16267075-16272219	Chr4:16318041-16323194	Chr4:17538247-17543403	0
ONG0400500	0	0	0	Chr4:19900412-19900837	Chr4:20745978-20746403	Chr4:20223780-20224205	0	Chr4:20474522-20474947	0	Chr4:18179148-18179573	0	Chr4:17580945-17581370	Chr4:17752119-17752544	Chr4:19160679-19161104	Chr4:18839545-18839970	Chr4:17823430-17823855	Chr4:16330231-16330656	Chr4:16370510-16370935	Chr4:17594529-17594954	Chr9:8038015-8038458
ONG0400510	Chr4:21330311-21330534	Chr4:20936993-20937216	Chr4:21616209-21616432	Chr4:20698125-20698348	Chr4:21545207-21545430	Chr4:21001104-21001327	Chr4:19500232-19500455	Chr4:21254590-21254813	Chr4:21853587-21853810	0	Chr4:19351057-19351280	Chr4:18358108-18358331	Chr4:18515363-18515586	Chr4:19911551-19911774	0	0	Chr4:17086970-17087162	Chr4:17120613-17120836	Chr4:18361683-18361904	0
ONG0400520	Chr4:21384532-21384854	Chr4:20977956-20978278	Chr4:21658640-21658962	Chr4:20738988-20739307	Chr4:21586088-21586407	Chr4:21041987-21042309	Chr4:19541113-19541435	Chr4:21295471-21295793	Chr4:21894473-21894795	Chr4:19037417-19037721	Chr4:19392092-19392411	Chr4:18402948-18403252	Chr4:18565361-18565665	Chr4:19952838-19953142	Chr4:19657451-19657755	Chr4:18641910-18642214	Chr4:17129101-17129423	Chr4:17162767-17163089	Chr4:18414807-18415117	Chr4:18853960-18854195
ONG0400530	0	0	0	0	0	0	0	0	0	0	0	Chr4:18919120-18919518	Chr4:19082009-19082407	Chr4:20452679-20453077	Chr4:20257652-20258050	0	0	0	0	0
ONG0400540	0	0	0	0	0	0	0	0	0	0	0	Chr4:19011416-19011633	Chr4:19184998-19185215	Chr4:20545150-20545367	Chr4:20360641-20360858	0	0	0	0	0
ONG0400550	0	Chr4:18428021-18428387	Chr4:19078633-19078999	0	Chr4:18968157-18968523	0	Chr4:17027321-17027687	0	Chr4:19319459-19319825	0	0	0	Chr4:19591164-19591551	Chr4:20973693-20974080	0	0	0	0	0	0
ONG0400560	0	0	Chr4:22999395-22999460	Chr4:22049552-22049617	0	0	0	0	0	0	0	Chr4:19689160-19689225	Chr4:19810382-19810447	Chr4:21192749-21192814	Chr4:21041124-21041189	0	Chr4:18298404-18298469	Chr4:18322122-18322187	Chr4:19896860-19896925	0
ONG0400570	Chr4:23041838-23042021	Chr4:22760647-22760830	Chr4:23553302-23553485	Chr4:22623237-22623420	Chr4:23324421-23324604	Chr4:22757923-22758106	Chr4:21257362-21257545,Chr11:18837035-18837216	Chr4:23031743-23031926	Chr4:23629827-23630010	Chr4:20916636-20916820	Chr4:21392358-21392541	Chr4:20230874-20231057	Chr4:20349857-20350040	Chr4:21724160-21724343	Chr4:21574762-21574945	Chr4:20408057-20408240	Chr4:18812896-18813079	Chr4:18824634-18824817	Chr4:20428373-20428617	Chr4:20618901-20618960
ONG0400580	Chr4:23089299-23089425	Chr4:22808095-22808221	Chr4:23600761-23600887	Chr4:22670512-22670638	Chr4:23371882-23372008	Chr4:22805377-22805503	Chr4:21304808-21304934,Chr11:18789681-18789807	Chr4:23079110-23079236	Chr4:23677276-23677402	Chr4:20963641-20963767	Chr4:21439724-21439850	Chr4:20278332-20278458	Chr4:20397321-20397447	Chr4:21771335-21771461	Chr4:21622214-21622340	Chr4:20455514-20455640	Chr4:18873674-18873794	Chr4:18877885-18878005	0	0
ONG0400590	Chr4:23107333-23107545	Chr4:22822227-22822439	Chr4:23614882-23615094	Chr4:22684727-22684939	Chr4:23389975-23390187	Chr4:22823401-22823613	Chr4:21322844-21323056,Chr11:18771549-18771761	Chr4:23093363-23093575	Chr4:23691394-23691606	Chr4:20977755-20977967	Chr4:21457878-21458091	Chr4:20296415-20296628	Chr4:20415356-20415568	Chr4:21789400-21789613	Chr4:21640281-21640493	Chr4:20473544-20473756	0	0	Chr4:20481102-20481277	0
ONG0400600	Chr4:23534292-23534600	Chr4:23253064-23253257	Chr4:24014286-24014594	Chr4:23083411-23083728	Chr4:23817350-23817667	Chr4:23251103-23251420	Chr4:21655806-21656123	Chr4:23526686-23527003	Chr4:24088502-24088819	Chr4:21399755-21400063	Chr4:21875502-21875819	Chr4:20727081-20727389	Chr4:20844748-20845056	Chr4:22137442-22137750,Syng_TIGR_013:5216-5524	Chr4:22042540-22042848	Chr4:20911058-20911366	Chr4:19340212-19340591	Chr4:19366997-19367376	Chr4:20899549-20899929	0
ONG0400610	Chr4:23574370-23574568	Chr4:23291251-23291448	Chr4:24052222-24052417	Chr4:23121618-23121816	Chr4:23857463-23857661	Chr4:23291122-23291320	Chr4:21695841-21696039	Chr4:23566726-23566924	Chr4:24128656-24128854	Chr4:21437714-21437911	Chr4:21915489-21915687	Chr4:20765041-20765238	Chr4:20882717-20882914	Chr4:22175407-22175604	Chr4:22080555-22080752	Chr4:20948676-20948873	0	0	0	0
ONG0400620	Chr4:23943684-23943830	Chr4:23638911-23639057	Chr4:24422720-24422866	Chr4:23493663-23493809	Chr4:24226821-24226967	Chr4:23635810-23635956	Chr4:22040569-22040715	Chr4:23911484-23911630	Chr4:24474821-24474967	Chr4:21796060-21796244	Chr4:22271327-22271511	Chr4:21113225-21113371	Chr4:21231160-21231306	Chr4:22545460-22545606	Chr4:22438733-22438879	Chr4:21309593-21309739	Chr4:19725518-19725664	Chr4:19751592-19751918	Chr4:21292395-21292541	0
ONG0400630	Chr4:23560536-23561962	Chr4:23943844-23948439	0	0	Chr4:23844738-23845040	Chr4:23940538-23945138,Chr4:23277362-23278787	Chr4:22320292-22324888,Chr4:21682067-21683493	Chr4:24213355-24217951	Chr4:24754446-24759037,Chr4:24114966-24116376	Chr4:22025615-22030231	Chr4:22494647-22499337,Chr4:21901962-21903573	Chr4:21405360-21409958	Chr4:21477656-21482247	Chr4:22823555-22828642	Chr4:22693202-22697795	Chr4:21614307-21618903	0	0	0	Chr4:21808448-21808749
ONG0400640	Chr4:24574111-24574227	Chr4:24322079-24322195	Chr4:25053090-25053206	Chr4:24133053-24133169	Chr4:24857381-24857497	Chr4:24319626-24319742	Chr4:22699460-22699576	Chr4:24590118-24590234	Chr4:25127855-25127971	Chr4:22417421-22417537	Chr4:22877797-22877913	Chr4:21783570-21783686	Chr4:21855756-21855872	Chr4:23201798-23201914	Chr4:23071233-23071349	Chr4:21992712-21992828	Chr4:20268219-20268335	Chr4:20334098-20334214	Chr4:21832557-21832673	0
ONG0400650	Chr4:25006266-25099090	Chr4:24747656-24840524	Chr4:25488462-25588346	Chr4:24561679-24596507	Chr4:25289749-25382629	Chr4:24766231-24858486	Chr4:23146169-23238499	Chr4:25040428-25133291	Chr4:25606517-25682532	Chr4:22859155-22883022	Chr4:23313829-23348509	Chr4:22218500-22242217	Chr4:22291108-22314825	Chr4:23636684-23660553	Chr4:23506149-23529866	Chr4:22428517-22452234	0	0	0	0
ONG0400660	Chr4:25525398-25525811	Chr4:25266906-25267319	Chr4:26019361-26019774	Chr4:25003231-25003643	Chr4:25795414-25795826	Chr4:25316951-25317363	Chr4:23697002-23697414	Chr4:25559644-25560057	Chr4:26103022-26103433	Chr4:23367139-23367551	Chr4:23741565-23741977	Chr4:22726275-22726686	Chr4:22796667-22797079	Chr4:24143438-24143850	Chr4:24013690-24014102	Chr4:22936348-22936759	Chr4:21081182-21081603	Chr4:21147095-21147516	Chr4:22668720-22669132	Chr4:23498288-23498710
ONG0400670	Chr4:26120907-26121054	Chr4:25862553-25862700	Chr4:26615034-26615181	Chr4:25658093-25658240	Chr4:26370534-26370681	Chr4:25891828-25891975	Chr4:24271892-24272039	Chr4:26155155-26155302	Chr4:26752433-26752580	Chr4:23893511-23893658	Chr4:24404769-24404916	Chr4:23257185-23257332	Chr4:23323041-23323188	Chr4:24669378-24669525	Chr4:24540240-24540387	Chr4:23462689-23462836	Chr4:21622094-21622241	Chr4:21687642-21687790	Chr4:23211496-23211643	0
ONG0400680	Chr4:26423337-26423541	Chr4:26160579-26160783	Chr4:26913207-26913411	Chr4:25960767-25960971	Chr4:26668771-26668975	Chr4:26195291-26195495	Chr4:24575373-24575577	Chr4:26453501-26453705	0	Chr4:24188829-24189033	0	Chr4:23552586-23552790	Chr4:23616096-23616300	Chr4:24962092-24962296	Chr4:24833351-24833555	Chr4:23755758-23755962	Chr4:21889672-21889876	Chr4:21955225-21955429	0	0
ONG0400690	Chr4:26655560-26655667	Chr4:26392857-26392964	Chr4:27145445-27145552	Chr4:26192453-26192560	Chr4:26900922-26901029	Chr4:26427345-26427452	Chr4:24807472-24807579	Chr4:26685768-26685875	Chr4:27267331-27267438	Chr4:24422870-24422977	Chr4:24922399-24922506	Chr4:23786736-23786843	Chr4:23850164-23850271	Chr4:25196176-25196283	Chr4:25067375-25067482	Chr4:23989893-23990000	Chr4:22130545-22130652	Chr4:22196560-22196667	0	Chr4:24585061-24585168
ONG0400700	Chr4:26764308-26764510	Chr4:26501695-26501897	Chr4:27259647-27259849	Chr4:26306293-26306495	Chr4:27015306-27015508	Chr4:26541580-26541782	Chr4:24921735-24921937	Chr4:26799993-26800195	Chr4:27381580-27381782	Chr4:24531713-24531915	Chr4:25074659-25074861	Chr4:23903960-23904162	Chr4:23958670-23958872	Chr4:25310908-25311110	Chr4:25184430-25184632	Chr4:24105955-24106157	Chr4:22244567-22244769	Chr4:22322523-22322725	Chr4:23880891-23881001	0
ONG0400710	Chr4:27127252-27127420	Chr4:26864681-26864848	Chr4:27627696-27627863	Chr4:26668895-26669062	Chr4:27378557-27378724	Chr4:26904623-26904790	Chr4:25284754-25284921	Chr4:27162985-27163152	Chr4:27749517-27749684	Chr4:24904365-24904531	Chr4:25457100-25457266	Chr4:24257101-24257268	Chr4:24321612-24321779	Chr4:25667177-25667344	Chr4:25537064-25537231	Chr4:24468723-24468890	Chr4:22596783-22596943	Chr4:22674696-22674856	Chr4:24266286-24266437	0
ONG0400720	Chr4:27316107-27316195	Chr4:27053492-27053580	Chr4:27816505-27816593	Chr4:26857168-26857256	Chr4:27567522-27567610	Chr4:27093582-27093670	Chr4:25451045-25451133	Chr4:27352043-27352131	Chr4:27938152-27938240	Chr4:25081839-25081927	Chr4:25634341-25634429	Chr4:24445956-24446044	Chr4:24510019-24510107	Chr4:25851248-25851336	Chr4:25722272-25722360	Chr4:24657814-24657902	Chr4:22757331-22757419	Chr4:22835269-22835357	Chr4:24591241-24591329	Chr4:25242617-25242703
ONG0400730	Chr4:27501122-27501425	Chr4:27238437-27238740	Chr4:28001455-28001758	Chr4:27042306-27042609	Chr4:27752560-27752863	Chr4:27278454-27278757	Chr4:25635748-25636051	Chr4:27537007-27537310	Chr4:28122925-28123228	Chr4:25266728-25267031	Chr4:25818359-25818662	Chr4:24630886-24631189	Chr4:24695151-24695454	Chr4:26036025-26036328	Chr4:25907243-25907546	Chr4:24842731-24843034	Chr4:22897141-22897426	Chr4:22975144-22975447	0	0
ONG0400740	Chr4:27558361-27558417	Chr4:27295727-27295783	Chr4:28058681-28058737	Chr4:27099227-27099283	Chr4:27809101-27809157	Chr4:27335729-27335785	Chr4:25693040-25693096	Chr4:27594391-27594447	Chr4:28185155-28185211	Chr4:25324035-25324091	Chr4:25875257-25875313	Chr4:24678533-24678589	Chr4:24752552-24752608	Chr4:26093224-26093280	Chr4:25964481-25964537	Chr4:24900030-24900086	Chr4:22927327-22927383	Chr4:23005289-23005345	Chr4:24818352-24818408	Chr4:25461942-25461999
ONG0400750	Chr4:27815545-27815665	Chr4:27553139-27553259	Chr4:28316121-28316241	Chr4:27356117-27356237	Chr4:28066400-28066520	Chr4:27592407-27592527	Chr4:25949799-25949919	Chr4:27851683-27851803	Chr4:28442385-28442505	Chr4:25581243-25581363	Chr4:26131239-26131359	Chr4:24935778-24935898	Chr4:25016226-25016346	Chr4:26350779-26350899	Chr4:26221912-26222032	Chr4:25157292-25157412	Chr4:23169541-23169776	Chr4:23259920-23260155	Chr4:25104681-25104916	0
ONG0400760	Chr4:28897422-28897695	Chr4:28621312-28621585	Chr4:29398273-29398546	Chr4:28425537-28425810	Chr4:29144142-29144415	Chr4:28669743-28670016	Chr4:27027270-27027543	Chr4:28919050-28919323	Chr4:29551896-29552169	Chr4:26649798-26650071	Chr4:27265242-27265515	Chr4:26021386-26021659	Chr4:26098691-26098964	Chr4:27431247-27431520	Chr4:27303957-27304230	Chr4:26239503-26239776	Chr4:24120864-24121137	Chr4:24214384-24214657	0	0
ONG0400770	Chr4:28939132-28939365	Chr4:28662977-28663210	Chr4:29439952-29440185	Chr4:28467326-28467559	Chr4:29185823-29186056	Chr4:28711400-28711633	Chr4:27068928-27069161	Chr4:28960748-28960981	Chr4:29593556-29593789	Chr4:26691436-26691669	Chr4:27306898-27307131	Chr4:26063114-26063347	Chr4:26140481-26140714	Chr4:27472989-27473222	Chr4:27345703-27345936	Chr4:26280831-26281064	Chr4:24162348-24162581	Chr4:24255890-24256123	Chr4:26232820-26233053	0
ONG0400780	0	0	0	Chr4:28504839-28505227	0	0	0	0	0	0	0	Chr4:26100588-26100976	Chr4:26178280-26178668	Chr4:27510417-27510805	Chr4:27383145-27383533	Chr4:26318337-26318725	0	0	0	0
ONG0400790	Chr4:29098188-29098584	Chr4:28822064-28822460	Chr4:29599026-29599422	Chr4:28619573-28619966	Chr4:29344896-29345292	Chr4:28851536-28851930	Chr4:27209055-27209449	Chr4:29119823-29120216	Chr4:29733678-29734072	Chr4:26831491-26831885	Chr4:27447043-27447437	Chr4:26215335-26215730	Chr4:26293023-26293418	Chr4:27625121-27625516	Chr4:27497925-27498320	Chr4:26433090-26433485	Chr4:24299804-24300199	Chr4:24393351-24393747	Chr4:26385123-26385516	0
ONG0400800	Chr4:29427925-29427991	Chr4:29152330-29152396	Chr4:29929652-29929718	Chr4:28929145-28929211	Chr4:29674588-29674654	Chr4:29221502-29221568	Chr4:27578972-27579038	Chr4:29449471-29449537	Chr4:30091729-30091795	Chr4:27227089-27227155	Chr4:27794348-27794414	Chr4:26564879-26564945	Chr4:26608378-26608444	Chr4:27940577-27940643	Chr4:27809079-27809145	Chr4:26748936-26749002	0	0	0	0
ONG0400810	Chr4:30182950-30183013	Chr4:29907585-29907648	Chr4:30694930-30694993	Chr4:29684024-29684087	Chr4:30429904-30429967	Chr4:29957579-29957642	Chr4:28330579-28330642	Chr4:30235284-30235347	Chr4:30881162-30881225	Chr4:28015370-28015433	Chr4:28551396-28551459	Chr4:27341738-27341801	Chr4:27386961-27387024	Chr4:28718543-28718606	Chr4:28587471-28587534	Chr4:27535325-27535388	Chr4:25272195-25272258	Chr4:25364352-25364415	0	0
ONG0400820	Chr4:31841360-31841419	Chr4:31660055-31660114	Chr4:32496646-32496705	Chr4:31486045-31486104	Chr4:32174380-32174439	Chr4:31788502-31788561	Chr4:30162087-30162146	Chr4:32020439-32020498	Chr4:32609790-32609849	Chr4:29587968-29588027	Chr4:30162670-30162729	Chr4:28962501-28962560	Chr4:28971141-28971200	Chr4:30313916-30313975	Chr4:30197087-30197146	Chr4:29123757-29123816	0	0	Chr4:29025990-29026049	0
ONG0400830	Chr4:31962788-31963267	Chr4:31784961-31785440	Chr4:32621548-32622027	Chr4:31611246-31611726	Chr4:32295785-32296265	Chr4:31913425-31913904	Chr4:30286997-30287476	Chr4:32145343-32145823	Chr4:32734730-32735209	Chr4:29709126-29709605	Chr4:30283698-30284177	Chr4:29083915-29084395	Chr4:29108140-29108619	Chr4:30456568-30457048	Chr4:30307051-30307530	Chr4:29245168-29245648	0	0	0	0
ONG0400840	Chr4:32105309-32105360	Chr4:31927366-31927417	Chr4:32763995-32764046	Chr4:31758504-31758555	Chr4:32449624-32449675	Chr4:32055940-32055991	Chr4:30429537-30429588	Chr4:32287728-32287779	Chr4:32877258-32877309	Chr4:29878034-29878085	Chr4:30452417-30452468	Chr4:29237906-29237957	Chr4:29261746-29261797	Chr4:30622308-30622359	Chr4:30472149-30472200	Chr4:29399097-29399148	0	0	Chr4:29288504-29288555	0
ONG0400850	Chr4:32608047-32608283	0	0	0	0	0	0	0	Chr4:33386780-33387016	Chr4:30380439-30380675	Chr4:30967153-30967389	Chr4:29745646-29745882	Chr4:29760682-29760918	Chr4:31145912-31146148	Chr4:31000285-31000521	Chr4:29909079-29909315	0	0	0	0
ONG0400860	0	Chr4:33905099-33905180	Chr4:34831325-34831406	0	0	Chr4:34013897-34013978	0	Chr4:34268454-34268535	Chr4:34715742-34715823	Chr4:31867332-31867413	0	Chr4:31164135-31164216	Chr4:31239148-31239229	Chr4:32538376-32538457	0	0	0	0	0	0
ONG0400870	Chr4:34211147-34256949	Chr4:34246973-34292781	Chr4:35172630-35218246	Chr4:34074382-34119611	Chr4:34648589-34694418	Chr4:34351349-34397128	Chr4:32651343-32697152	Chr4:34610260-34656089	Chr4:35057015-35102826	Chr4:32199808-32257132	Chr4:32704108-32749672	Chr4:31520941-31566168	Chr4:31568164-31613524	Chr4:32872677-32929972	Chr4:32746985-32804241	Chr4:31702832-31748642	Chr4:29095960-29122776	Chr4:29177765-29204578	Chr4:31591213-31616072	Chr4:31669489-31760117
ONG0400880	Chr4:34741827-34742049	Chr4:34715820-34716042	Chr4:35680075-35680297	Chr4:34544573-34544795	Chr4:35156854-35157076	Chr4:34820181-34820403	Chr4:33128537-33128759	Chr4:35079271-35079493	Chr4:35530621-35530843	Chr4:32722132-32722378	Chr4:33181290-33181512	Chr4:32065887-32066133	Chr4:32128550-32128796	Chr4:33413051-33413297	Chr4:33288061-33288307	Chr4:32180315-32180537	Chr4:29548200-29548445	Chr4:29625406-29625651	0	0
ONG0400890	Chr4:35102161-35102542	Chr4:35056948-35057329	Chr4:36034371-36034752	Chr4:34876508-34876889	Chr4:35496913-35497294	Chr4:35161082-35161463	Chr4:33462964-33463345	Chr4:35420293-35420674	Chr4:35878382-35878763	Chr4:33060143-33060524	Chr4:33513661-33514042	Chr4:32404336-32404717	Chr4:32467000-32467381	Chr4:33749892-33750273	Chr4:33620849-33621230	Chr4:32513732-32514113	Chr4:29858553-29858940	Chr4:29934276-29934663	Chr4:32426755-32427142	Chr4:32536443-32539301
ONG0400900	Chr4:35663598-35663792	0	0	0	0	0	0	0	0	Chr4:33643357-33643551	Chr4:34071930-34072124	Chr4:32966030-32966224	Chr4:33020929-33021123	Chr4:34306655-34306849	Chr4:34182553-34182747	Chr4:33075694-33075888	0	0	0	0
ONG0400910	0	Chr4:36197760-36197843	0	0	0	0	Chr4:34603507-34603590	Chr4:36572738-36572821	Chr4:37018102-37018185	0	0	Chr4:33536619-33536702	Chr4:33591405-33591488	Chr4:34877469-34877552	0	0	0	0	0	0
ONG0500010	0	0	0	0	0	0	0	0	0	0	0	0	0	Chr5:405042-408731	0	0	0	0	0	0
ONG0500020	Chr5:715616-715781	Chr5:620282-620934	Chr5:707904-708532	Chr5:678616-678749	Chr5:700860-700993	Chr5:723958-724586	Chr5:696389-696554	Chr5:721375-722003	Chr5:669269-669921	Chr5:654064-654693	Chr5:685863-686491	Chr5:710927-711556	Chr5:763484-763649	Chr5:722139-722768	Chr5:742351-742980	Chr5:741652-742304	Chr5:641104-641721	Chr5:641207-641824	Chr5:638023-638656	Chr5:934960-935601
ONG0500030	0	0	0	0	0	0	0	0	0	0	0	Chr5:904138-906728	0	Chr5:915183-917773	0	0	0	0	0	0
ONG0500040	Chr5:1248544-1248797	Chr5:1170732-1170985	Chr5:1239479-1239734	Chr5:1166014-1166269	Chr5:1266103-1266356	Chr5:1255543-1255798	Chr5:1233463-1233716	Chr5:1253624-1253879	Chr5:1233247-1233502	Chr5:1178345-1178599	Chr5:1233955-1234209	Chr5:1232599-1232853	Chr5:1314079-1314333	Chr5:1248241-1248495	Chr5:1268832-1269083	Chr5:1305355-1305608	0	0	0	0
ONG0500050	Chr5:2520601-2520658	Chr5:2442483-2442540	Chr5:2481195-2481252	Chr5:2394023-2394080	Chr5:2591953-2592010	Chr5:2490257-2490314	Chr5:2558145-2558202	Chr5:2488693-2488750	Chr5:2560492-2560549	Chr5:2387932-2387989	Chr5:2504178-2504235	Chr5:2466275-2466332	Chr5:2552986-2553043	Chr5:2532381-2532438	Chr5:2544710-2544767	Chr5:2562690-2562747	Chr5:2192537-2192594	Chr5:2197859-2197916	Chr5:2526526-2526583	Chr5:2570571-2570628
ONG0500060	Chr5:2672764-2672842	Chr5:2594747-2594825	Chr5:2631408-2631486	Chr5:2545791-2545869	Chr5:2742174-2742252	Chr5:2640388-2640466	Chr5:2708384-2708462	Chr5:2641011-2641089	Chr5:2712735-2712813	Chr5:2538380-2538458	Chr5:2654347-2654425	Chr5:2613296-2613374	Chr5:2697813-2697891	Chr5:2668751-2668829	Chr5:2681079-2681157	Chr5:2703970-2704048	0	0	0	Chr5:2724549-2724627
ONG0500070	Chr5:2912558-2912850	Chr5:2834535-2834827	Chr5:2878903-2879195	Chr5:2785646-2785938	Chr5:2977286-2977578	Chr5:2875507-2875799	Chr5:2943587-2943879	Chr5:2880867-2881159	Chr5:2952521-2952813	Chr5:2774386-2774678	Chr5:2890016-2890308	Chr5:2869655-2869947	Chr5:2953626-2953918	Chr5:2924473-2924765	Chr5:2936741-2937033	Chr5:3006975-3007267	Chr5:2529323-2529615	Chr5:2534258-2534550	Chr5:2890081-2890370	0
ONG0500080	Chr5:3053829-3054030	Chr5:2975836-2976037	Chr5:3020496-3020697	Chr5:2925968-2926169	Chr5:3120214-3120415	Chr5:3017400-3017603	Chr5:3085262-3085463	Chr5:3022503-3022704	Chr5:3095375-3095576	Chr5:2920082-2920283	Chr5:3037822-3038023	Chr5:3023403-3023604	Chr5:3129107-3129308	Chr5:3096350-3096551	Chr5:3106349-3106550	Chr5:3185666-3185867	Chr5:2665907-2666108	Chr5:2669908-2670109	0	0
ONG0500090	Chr5:3129184-3129557	Chr5:3051237-3051610	Chr5:3098172-3098545	Chr5:3003418-3003791	Chr5:3196308-3196681	Chr5:3095099-3095472	Chr5:3162991-3163364	Chr5:3100187-3100560	Chr5:3173387-3173760	Chr5:3011801-3012174	Chr5:3129302-3129675	Chr5:3096597-3096970	Chr5:3202269-3202642	Chr5:3169448-3169821	Chr5:3179528-3179901	Chr5:3284438-3284811	Chr5:2742712-2743085	Chr5:2753068-2753441	Chr5:3106573-3106946	Chr5:3274711-3275081
ONG0500100	Chr5:3541789-3541961	Chr5:3461691-3461863	Chr5:3442771-3442943	Chr5:3347217-3347389	Chr5:3606630-3606802	Chr5:3439852-3440024	Chr5:3507775-3507947	Chr5:3445004-3445176	Chr5:3514545-3514717	Chr5:3421937-3422109	Chr5:3573394-3573566	Chr5:3496159-3496331	Chr5:3630566-3630738	Chr5:3569009-3569181	Chr5:3527299-3527471	Chr5:3708979-3709151	Chr5:3093576-3093747	Chr5:3104511-3104682	0	Chr5:3665241-3665413
ONG0500110	Chr5:3830763-3831178	Chr5:3750710-3751125	Chr5:3731709-3732124	Chr5:3635710-3636125	Chr5:3895578-3895993	Chr5:3728789-3729204	Chr5:3798099-3798514	Chr5:3733918-3734333	Chr5:3803578-3803993	Chr5:3708955-3709370	Chr5:3860534-3860950	Chr5:3801208-3801623	Chr5:3922591-3923006	Chr5:3877145-3877560	Chr5:3816393-3816808	Chr5:4022465-4022879	Chr5:3380126-3380541	Chr5:3390995-3391410	Chr5:3749112-3749526	Chr5:3954776-3955190	Chr5:3842526-3842940
ONG0500120	Chr5:3839368-3839728	Chr5:3759315-3759675	Chr5:3740314-3740674	Chr5:3644315-3644688	Chr5:3904183-3904565	Chr5:3737394-3737754	Chr5:3814848-3815208	Chr5:3742523-3742905	Chr5:3812183-3812543	Chr5:3717508-3717868	Chr5:3869092-3869452	Chr5:3809792-3810152	Chr5:3931178-3931538	Chr5:3893893-3894253	Chr5:3836722-3837082	Chr5:4030970-4031330	Chr5:3388680-3389039	Chr5:3399549-3399908	Chr5:3757638-3757998	0
ONG0500130	Chr5:4773731-4774095	Chr5:4690253-4690617	Chr5:4597752-4598116	Chr5:4501288-4501652	Chr5:4789121-4789485	Chr5:4668411-4668775	Chr5:4854171-4854535	Chr5:4602314-4602678	Chr5:4651880-4652244	Chr5:4428439-4428803	Chr5:4579649-4580013	Chr5:4924403-4924767	Chr5:4556774-4557132	Chr5:4660022-4660386	Chr5:4649813-4650177	Chr5:4704182-4704545	Chr5:3812814-3813177	Chr5:3946751-3947114	Chr5:4188670-4189034	0
ONG0500140	0	0	Chr5:4802521-4802618	0	0	0	Chr5:5045195-5045292	Chr5:4793317-4793414	0	0	0	0	Chr5:4744780-4744877	Chr5:4848259-4848356	Chr5:4845782-4845879	Chr5:4889033-4889130	0	0	0	0
ONG0500150	Chr5:5162112-5162406	Chr5:5065328-5065622	Chr5:4987085-4987379	Chr5:4875140-4875434	Chr5:5164080-5164374	Chr5:5043134-5043428	Chr5:5229565-5229859	Chr5:4977892-4978186	Chr5:5026350-5026644	Chr5:4810035-4810293	Chr5:4955875-4956133	Chr5:5304875-5305029	Chr5:4929402-4929696	Chr5:5032856-5033150	Chr5:5030392-5030686	Chr5:5077281-5077435	Chr5:4175189-4175481	Chr5:4321765-4322064	Chr5:4513521-4513674	Chr5:5056262-5056554
ONG0500160	Chr5:5653738-5654086	Chr5:5556938-5557286	Chr5:5478174-5478522	Chr5:5366003-5366351	Chr5:5655784-5656132	Chr5:5534763-5535111	Chr5:5739756-5740090	Chr5:5469346-5469694	Chr5:5517384-5517732	Chr5:5155302-5155636	Chr5:5301587-5302024	Chr5:5793108-5793545	Chr5:5416250-5416687	Chr5:5511236-5511570	Chr5:5517321-5517758	Chr5:5579726-5580060	Chr5:4666655-4667003	Chr5:4805761-4806109	Chr5:4883694-4884131	0
ONG0500170	Chr5:5688717-5688861	Chr5:5591939-5592083	Chr5:5513154-5513298	Chr5:5400963-5401107	Chr5:5690786-5690930	Chr5:5569761-5569905	Chr5:5775299-5775411	Chr5:5523307-5523451	Chr5:5552362-5552506	Chr5:5190925-5191037	Chr5:5373002-5373147	Chr5:5865553-5865698	Chr5:5488721-5488866	Chr5:5546785-5546897	Chr5:5589780-5589925	Chr5:5615234-5615346	Chr5:4740998-4741148	Chr5:4880017-4880167	Chr5:4961965-4962116	Chr5:5547951-5548096
ONG0500180	Chr5:6538149-6538321	Chr5:6441406-6441578	Chr5:6362535-6362707	Chr5:6249256-6249428	Chr5:6540377-6540549	Chr5:6419202-6419374	Chr5:6720914-6721086	Chr5:6388165-6388337	Chr5:6401634-6401806	Chr5:6193190-6193365	Chr5:6326211-6326386	Chr5:6792426-6792601	Chr5:6415517-6415692	Chr5:6486347-6486519	Chr5:6460552-6460724	Chr5:6545093-6545265	Chr5:5627844-5628019	Chr5:5724039-5724214	Chr5:5975629-5975804	0
ONG0500190	0	0	Chr5:6546694-6546762	Chr5:6433060-6433128	Chr5:6724572-6724640	0	Chr5:6905600-6905668	Chr5:6572588-6572656	Chr5:6585932-6586000	0	0	0	0	Chr5:6670189-6670257	Chr5:6644951-6645019	Chr5:6729318-6729386	Chr5:5809129-5809197	Chr5:5904984-5905052	Chr5:6165032-6165100	0
ONG0500200	Chr5:8052380-8052548	Chr5:7990588-7990756	Chr5:7937281-7937497	Chr5:7827033-7827249	Chr5:8074920-8075088	Chr5:7932029-7932197	Chr5:8216037-8216205	Chr5:7918539-7918707	Chr5:7921369-7921537	Chr5:7791073-7791241	Chr5:7931270-7931438	Chr5:8324153-8324322	Chr5:7946504-7946673	Chr5:7941049-7941218	Chr5:7926513-7926682	Chr5:8045033-8045202	0	0	0	0
ONG0500210	Chr5:8154312-8155704	Chr5:8092494-8093886	Chr5:8028252-8029644	Chr5:7917842-7919234	Chr5:8176828-8178220	Chr5:8032466-8033858	Chr5:8316481-8317873	Chr5:8020474-8021866	Chr5:8023307-8024699	Chr5:7891717-7893108	Chr5:8033221-8034613	Chr5:8418098-8419489	Chr5:8040148-8041539	Chr5:8034890-8036281	Chr5:8017899-8019290	Chr5:8139137-8140528	Chr5:7147743-7149132	Chr5:7233979-7235368	Chr5:7816296-7817687	Chr5:8654398-8654608
ONG0500220	Chr5:9010682-9010981	Chr5:8948875-8949174	Chr5:8887725-8888024	Chr5:8776487-8776786	Chr5:9033420-9033719	Chr5:8914444-8914743	Chr5:9198503-9198802	Chr5:8877045-8877344	Chr5:8879064-8879363	Chr5:8842683-8842982	Chr5:8971490-8971789	Chr5:9330396-9330695	Chr5:8961547-8961846	Chr5:8946816-8947096	Chr5:8887338-8887637	Chr5:9060890-9061189	Chr5:7920115-7920414	Chr5:8059432-8059731	0	Chr5:9588042-9588341
ONG0500230	Chr5:9226581-9226747	Chr5:9156351-9156517	Chr5:9114676-9114842	Chr5:8983128-8983294	Chr5:9249335-9249501	Chr5:9130014-9130180	Chr5:9414077-9414243	Chr5:9091682-9091848	Chr5:9086385-9086551	Chr5:9024164-9024330	Chr5:9152977-9153143	Chr5:9546250-9546416	Chr5:9177350-9177516	Chr5:9162648-9162814	Chr5:9111669-9111835	Chr5:9276445-9276611	Chr5:8074690-8074854	Chr5:8213509-8213673	Chr5:9038935-9039101	Chr5:9756213-9756379
ONG0500240	Chr5:9355649-9355705	Chr5:9285414-9285470	Chr5:9260779-9261312	Chr5:9112020-9112076	Chr5:9376802-9376858	Chr5:9250713-9250769	Chr5:9534757-9534813	Chr5:9219087-9219143	Chr5:9213674-9213730	Chr5:9234330-9234386	Chr5:9355367-9355423	Chr5:9673715-9673771	Chr5:9304844-9304900	Chr5:9288378-9288434	Chr5:9239150-9239206	Chr5:9403947-9404003	Chr5:8206717-8206773	Chr5:8313826-8313882	Chr5:9146176-9146232	Chr5:9837908-9837964
ONG0500250	Chr5:9437028-9437150	Chr5:9366755-9366877	Chr5:9342128-9342250	Chr5:9193282-9193404	Chr5:9458227-9458349	Chr5:9333767-9333889	Chr5:9617789-9617911	Chr5:9300495-9300617	Chr5:9295062-9295184	Chr5:9331886-9332008	Chr5:9452904-9453026	Chr5:9754004-9754126	Chr5:9384428-9384550	Chr5:9369765-9369887	Chr5:9320528-9320650	Chr5:9485342-9485464	Chr5:8284613-8284735	Chr5:8393676-8393798	0	Chr5:9927942-9928064
ONG0500260	Chr5:10906240-10906727	Chr5:10826526-10827013	Chr5:10788823-10789310	Chr5:10641867-10642354	Chr5:10941305-10941792	Chr5:10813444-10813931	Chr5:11097476-11097963	Chr5:10748756-10749244	Chr5:10775816-10776303	Chr5:10743021-10743511	Chr5:10990836-10991326	Chr5:11227739-11228226	Chr5:10766768-10767255	Chr5:10847015-10847502	Chr5:10733759-10734246	Chr5:10958938-10959425	Chr5:9199214-9199689	Chr5:9085401-9085886	Chr5:10231556-10232044	Chr5:10606703-10607199
ONG0500270	Chr5:12699517-12699607	Chr5:12602545-12602635	Chr5:12557820-12557909	Chr5:12426075-12426166	Chr5:12720842-12720932	Chr5:12580336-12580425	Chr5:12523919-12524009	Chr5:12501277-12501365	Chr5:12523919-12524009	0	0	Chr5:12970074-12970164	Chr5:12518116-12518206	Chr5:12577051-12577141	Chr5:12559275-12559364	Chr5:12731932-12732022	Chr5:10698064-10698157	Chr5:10577900-10577992	0	0
ONG0500280	Chr5:12805305-12805451	Chr5:12708390-12708536	Chr5:12663062-12663573	Chr5:12531479-12531625	Chr5:12826654-12826800	Chr5:12686136-12686282	Chr5:12907601-12907747	Chr5:12607075-12607221	Chr5:12629741-12629887	Chr5:12931437-12931583	Chr5:13448423-13448569	Chr5:13075973-13076119	Chr5:12623959-12624105	Chr5:12681753-12681899	Chr5:12684470-12684616	Chr5:12837832-12837978	Chr5:10802532-10802678	Chr5:10682252-10682398	Chr5:12134895-12135041	Chr5:11931805-11931951	Chr5:12949535-12949678
ONG0500290	0	0	0	0	0	0	0	0	0	0	0	0	0	Chr5:12886649-12892011	0	0	0	0	0	0
ONG0500300	Chr5:13894584-13895121	Chr5:13788109-13788646	Chr5:13739701-13740238	Chr5:13608998-13609535	Chr5:13885052-13885589	Chr5:13768216-13768753	Chr5:13989828-13990365	Chr5:13678102-13678636	Chr5:13711246-13711783	Chr5:13946077-13946614	Chr5:14462233-14462770	Chr5:14119835-14120372	Chr5:13672987-13673524	Chr5:13729873-13730410	Chr5:13769723-13770260	Chr5:13919056-13919593	Chr5:11654445-11654982	Chr5:11513357-11513894	Chr5:13586475-13587010	Chr5:13640102-13640614
ONG0500310	Chr5:14203517-14203590	Chr5:14051548-14051621	Chr5:14008244-14008317	Chr5:13876495-13876568	Chr5:14201512-14201585	Chr5:14036844-14036917	Chr5:14258476-14258549	Chr5:14001747-14001820	Chr5:14017486-14017559	Chr5:14198357-14198430	Chr5:14714596-14714669	Chr5:14422570-14422643	Chr5:13974483-13974556	Chr5:13947385-13947458	Chr5:14075755-14075828	Chr5:14214125-14214198	Chr5:11871713-11871786	Chr5:11730629-11730702	Chr5:13338255-13342533	0
ONG0500320	Chr5:14835672-14836113	Chr5:14727733-14728168	Chr5:14683155-14683591	Chr5:14550794-14551230	Chr5:14829551-14829988	Chr5:14713157-14713595	Chr5:14934766-14935204	Chr5:14630129-14630567	Chr5:14645362-14645799	Chr5:14846348-14846786	Chr5:15342405-15342838	Chr5:14996037-14996471	Chr5:14536957-14537392	Chr5:14497822-14498258	Chr5:14648610-14649046	Chr5:14785855-14786292	Chr5:12369386-12369817	Chr5:12228261-12228692	Chr5:13970020-13970467	0
ONG0500330	Chr5:14907668-14907805	Chr5:14799752-14799889	Chr5:14754948-14755085	Chr5:14622803-14622940	Chr5:14901682-14901819	Chr5:14785238-14785375	Chr5:15006837-15006974	Chr5:14702122-14702259	Chr5:14717435-14717572	Chr5:14918436-14918573	Chr5:15442537-15442671	Chr5:15080952-15081093	Chr5:14621881-14622022	Chr5:14582631-14582772	Chr5:14733533-14733674	Chr5:14870778-14870919	Chr5:12446893-12447033	Chr5:12305755-12305895	0	0
ONG0500340	0	0	0	0	0	0	0	0	0	0	0	Chr5:16498673-16498929	0	Chr5:15791609-15791865	Chr5:16159377-16159633	0	0	0	Chr5:15269142-15269398	0
ONG0500350	Chr5:16469559-16469815	Chr5:16290933-16291189,Chr5:16346056-16346312	Chr5:16312506-16312762	Chr5:16114563-16114731	Chr5:16396839-16397007	Chr5:16274357-16274613,Chr5:16329540-16329796	Chr5:16442030-16442286,Chr5:16497191-16497447	Chr5:16221237-16221493	Chr5:16212448-16212616	Chr5:16425035-16425291	Chr5:16483095-16483351	Chr5:16498673-16498929,Chr5:16553780-16554036	Chr5:16177771-16178027,Chr5:16122658-16122914	Chr5:15791609-15791865,5:15838034-15838290	Chr5:16214326-16214573,Chr5:16159377-16159633	Chr5:16360136-16360392,Chr5:16305305-16305491	Chr5:13444801-13445057	Chr5:13291260-13291516	Chr5:15269142-15269398	0
ONG0500360	Chr5:17020397-17020500	Chr5:16977260-16977363	Chr5:16873809-16873912	Chr5:16660037-16660140	Chr5:16951134-16951237	Chr5:16961048-16961151	Chr5:17064749-17064852	Chr5:16775525-16775628	Chr5:16766634-16766737	Chr5:16979059-16979162	Chr5:16901616-16901719	Chr5:17067384-17067487	Chr5:16680828-16680931	Chr5:16329927-16330030	Chr5:16701918-16702021	Chr5:16809877-16809980	Chr5:13779637-13779740	Chr5:13626047-13626150	0	Chr5:16404001-16404104
ONG0500370	Chr5:17416785-17416933	Chr5:17373592-17373740	Chr5:17257966-17258114	Chr5:17032212-17032360	Chr5:17358742-17358890	Chr5:17334964-17335112	Chr5:17446860-17447008	Chr5:17160731-17160879	Chr5:17178096-17178244	Chr5:17370540-17370688	Chr5:17340672-17340820	Chr5:17548222-17548370	Chr5:17166675-17166823	Chr5:16720571-16720719	Chr5:17192014-17192162	Chr5:17245170-17245318	Chr5:14200490-14200638	Chr5:14059540-14059688	Chr5:16101140-16101288	0
ONG0500380	Chr5:18253783-18254102	Chr5:18220351-18220670	Chr5:18099458-18099777	Chr5:17847888-17848207	Chr5:18174666-18174985	Chr5:18152856-18153176	Chr5:18300933-18301252	Chr5:17972515-17972834	Chr5:18011966-18012285	Chr5:18153465-18153784	Chr5:18124839-18125158	Chr5:18366653-18366973	Chr5:17887155-17887475	Chr5:17438564-17438884	Chr5:17912094-17912414	Chr5:17970388-17970708	Chr5:14893162-14893481	Chr5:14726241-14726560	Chr5:16785580-16785900	0
ONG0500390	Chr5:18906540-18907014	Chr5:18872873-18873347	Chr5:18750364-18750838	Chr5:18499899-18500372	Chr5:18826931-18827405	Chr5:18652404-18652883	Chr5:18974395-18974869	Chr5:18625096-18625569	Chr5:18664166-18664640	Chr5:18810817-18811291	Chr5:18746014-18746488	Chr5:18865772-18866251	Chr5:18386012-18386491	Chr5:17938071-17938550	Chr5:18410973-18411452	Chr5:18469782-18470261	Chr5:15439014-15439493	Chr5:15259335-15259809	Chr5:17342239-17342718	0
ONG0500400	Chr5:18950195-18950503	Chr5:18916510-18916818	Chr5:18794013-18794321	Chr5:18543588-18543896	Chr5:18870611-18870919	0	Chr5:19018047-19018355	Chr5:18668768-18669076	Chr5:18707828-18708136	Chr5:18854883-18855191	Chr5:18790066-18790374	Chr5:18908045-18908351	Chr5:18428286-18428592	Chr5:17980326-17980632	0	Chr5:18512054-18512360	Chr5:15486810-15487118	Chr5:15301676-15301984	Chr5:17384036-17384344	0
ONG0500410	Chr5:19516978-19517083	Chr5:19489510-19489615	Chr5:19355760-19355865	Chr5:19107417-19107522	Chr5:19433878-19433983	Chr5:19248400-19248505	Chr5:19521755-19521860	Chr5:19235656-19235761	Chr5:19274380-19274485	0	Chr5:19262488-19262593	Chr5:19463125-19463230	Chr5:18983193-18983298	Chr5:18529248-18529353	Chr5:19016103-19016208	Chr5:19069205-19069310	0	0	0	0
ONG0500420	0	0	0	0	0	0	0	0	0	0	0	Chr5:20123538-20123690	Chr5:19643433-19643585	Chr5:19190128-19190280	Chr5:19680521-19680673	Chr5:19730116-19730268	Chr5:16611969-16612121	Chr5:16406020-16406172	Chr5:18801916-18802065	0
ONG0500430	0	0	0	0	0	0	0	0	0	0	0	0	0	Chr5:19405549-19406585	Chr5:19924185-19925221	0	0	0	0	0
ONG0500440	Chr5:20706420-20709811	0	Chr5:20577618-20580979	Chr5:20427552-20430953	0	Chr5:20575627-20579017	0	Chr5:20425281-20428672	Chr5:20483864-20487253	0	0	Chr5:20653055-20656446	0	Chr5:19687717-19691105	Chr5:20214519-20217908	0	Chr5:17071861-17075252	Chr5:16872101-16875493	Chr5:19353516-19356906	0
ONG0500450	Chr5:20913821-20913882	Chr5:20984673-20984734	Chr5:20778536-20778597	Chr5:20653127-20653188	Chr5:20964629-20964690	Chr5:20801112-20801173	Chr5:21056419-21056480	Chr5:20637580-20637641	Chr5:20709377-20709438	Chr5:20867462-20867523	Chr5:20802557-20802618	Chr5:20868144-20868205	Chr5:20376583-20376644	Chr5:19894828-19894889	Chr5:20414438-20414499	Chr5:20492071-20492132	Chr5:17288447-17288508	0	Chr5:19570364-19570425	0
ONG0500460	Chr5:20973742-20973883	Chr5:21044579-21044720	Chr5:20838449-20838590	Chr5:20713023-20713164	Chr5:21024542-21024683	Chr5:20861011-20861152	Chr5:21116334-21116475	Chr5:20697492-20697633	Chr5:20769300-20769441	Chr5:20927701-20927842	Chr5:20862735-20862876	Chr5:20928865-20929006	Chr5:20437219-20437360	Chr5:19967123-19967264	Chr5:20486883-20487024	Chr5:20564187-20564328	Chr5:17352830-17352913	Chr5:17143895-17144036	Chr5:19629252-19629393	0
ONG0500470	Chr5:22048766-22052208	Chr5:22098861-22102303	Chr5:21869153-21872564	Chr5:21752896-21756365	Chr5:22050284-22053733	Chr5:21901728-21905170	Chr5:22151908-22155350	Chr5:21733072-21736518	Chr5:21817571-21821013	Chr5:21962572-21966014	Chr5:21905481-21908947	Chr5:21975015-21978456	Chr5:21483118-21486559	Chr5:20971748-20975189	Chr5:21491314-21494753	Chr5:21564292-21567733	0	0	0	0
ONG0500480	0	0	0	0	0	0	0	0	0	0	0	Chr5:22005704-22005758	Chr5:21513754-21513808	Chr5:21001480-21001534	Chr5:21521958-21522012	Chr5:21594789-21594843	0	0	0	0
ONG0500490	Chr5:22320515-22320595	Chr5:22370107-22370187	Chr5:22139696-22139776	Chr5:22024119-22024199	Chr5:22321486-22321566	Chr5:22172910-22172990	Chr5:22423285-22423365	Chr5:22004316-22004396	Chr5:22088836-22088916	Chr5:22233780-22233860	Chr5:22150098-22150178	Chr5:22229407-22229487	Chr5:21740866-21740946	Chr5:21225203-21225283	Chr5:21747317-21747397	Chr5:21820159-21820239	Chr5:18503266-18503346	Chr5:18318807-18318887	0	0
ONG0500500	Chr5:25147558-25147890	Chr5:25136867-25137199	Chr5:24918838-24919170	Chr5:24785955-24786287	Chr5:25075915-25076247	Chr5:24943261-24943593	Chr5:25224315-25224647	Chr5:24764434-24764766	Chr5:24877137-24877469	Chr5:24979755-24980087	Chr5:24821709-24822042	Chr5:25041412-25041744	Chr5:24514255-24514587	Chr5:23991145-23991477	Chr5:24513915-24514247	Chr5:24606140-24606472	0	0	Chr5:24165991-24166324	Chr5:24283715-24284047
ONG0500510	Chr5:25298023-25298297	Chr5:25287386-25287621	Chr5:25069324-25069598	Chr5:24949813-24950087	Chr5:25226378-25226652	Chr5:25093722-25093996	Chr5:25374583-25374818	Chr5:24915010-24915245	Chr5:25027595-25027869	Chr5:25142986-25143260	Chr5:24985444-24985718	Chr5:25196816-25197051	Chr5:24669796-24670031	Chr5:24146541-24146776	Chr5:24669331-24669566	Chr5:24761666-24761901	Chr5:21221445-21221719	Chr5:21034055-21034329	Chr5:24321274-24321548	0
ONG0500520	Chr5:25575453-25575567	Chr5:25564820-25564934	Chr5:25346472-25346586	Chr5:25226967-25227081	Chr5:25503798-25503912	Chr5:25371721-25371835	Chr5:25675370-25675484	Chr5:25188052-25188166	Chr5:25338947-25339061	Chr5:25407465-25407579	Chr5:25249846-25249960	Chr5:25497528-25497642	Chr5:24970613-24970727	Chr5:24458133-24458247	Chr5:24981715-24981829	Chr5:25065767-25065881	Chr5:21479107-21479221	Chr5:21294680-21294794	Chr5:24619931-24620045	Chr5:24743548-24743646
ONG0500530	Chr5:25606599-25606876	Chr5:25595969-25596246	Chr5:25377623-25377900	Chr5:25258131-25258408	Chr5:25534965-25535242	Chr5:25403580-25403856	Chr5:25707260-25707536	Chr5:25219202-25219479	Chr5:25370102-25370379	Chr5:25438690-25438963	Chr5:25281063-25281336	Chr5:25529426-25529702	Chr5:25002501-25002777	Chr5:24490025-24490301	Chr5:25013596-25013872	Chr5:25097653-25097929	0	0	Chr5:24651733-24652008	0
ONG0500540	Chr5:26419054-26419299	Chr5:26408427-26408672	Chr5:26189259-26189504	Chr5:26070397-26070642	Chr5:26381977-26382222	Chr5:26175034-26175279	Chr5:26434572-26434817	Chr5:26031490-26031735	Chr5:26182419-26182664	Chr5:26229251-26229496	Chr5:26068195-26068440	Chr5:26290933-26291178	Chr5:25775864-25776109	Chr5:25264277-25264522	Chr5:25786965-25787210	Chr5:25878337-25878582	0	0	Chr5:25518714-25518917	Chr5:25473427-25473697
ONG0500550	Chr5:26541536-26541673	Chr5:26530857-26530994	Chr5:26311725-26311862	Chr5:26192810-26192947	Chr5:26504422-26504559	Chr5:26297122-26297259	Chr5:26557027-26557164	Chr5:26153942-26154079	Chr5:26304859-26304996	Chr5:26353172-26353309	Chr5:26192121-26192258	Chr5:26412857-26412994	Chr5:25897282-25897419	Chr5:25385704-25385841	Chr5:25908386-25908523	Chr5:25999707-25999844	Chr5:22302141-22302278	Chr5:22106741-22106878	0	0
ONG0500560	Chr5:27043513-27043676	Chr5:27032754-27032917	Chr5:26813504-26813667	Chr5:26694222-26694385	Chr5:27006547-27006710	Chr5:26825305-26825468	Chr5:27049129-27049292	Chr5:26668976-26669139	Chr5:26806850-26807013	Chr5:26907563-26907726	Chr5:26745303-26745466	Chr5:26953545-26953708	Chr5:26416984-26417147	Chr5:25916886-25917049	Chr5:26440985-26441148	Chr5:26541949-26542112	Chr5:22743827-22743990	Chr5:22548926-22549089	Chr5:26131852-26132015	0
ONG0500570	0	0	0	0	0	0	0	0	0	0	0	0	0	Chr5:27187787-27187849	0	0	0	0	0	0
ONG0500580	Chr5:29745341-29745505	Chr5:29764106-29764270	Chr5:29567503-29567667	Chr5:29391008-29391172	Chr5:29784232-29784396	Chr5:29542235-29542399	Chr5:29683749-29683913	Chr5:29361630-29361794	Chr5:29502680-29502844	Chr5:29613057-29613221	Chr5:29597324-29597488	Chr5:29686862-29687026	Chr5:29160108-29160272	Chr5:28681463-28681627	Chr5:29116258-29116422	Chr5:29272054-29272218	Chr5:25244057-25244221	Chr5:25075943-25076107	Chr5:29094359-29094523	0
ONG0500590	Chr5:30527901-30527984	Chr5:30534013-30534096	Chr5:30348793-30348876	Chr5:30161378-30161461	Chr5:30546795-30546878	Chr5:30281613-30281696	Chr5:30410914-30410997	Chr5:30170201-30170284	Chr5:30255292-30255375	Chr5:30392007-30392090	Chr5:30395539-30395622	Chr5:30443484-30443567	Chr5:29917078-29917161	Chr5:29439459-29439542	Chr5:29866632-29866715	Chr5:30023150-30023233	0	0	0	0
ONG0500600	Chr5:30538377-30538458	Chr5:30543549-30543630	Chr5:30358306-30358387	Chr5:30170906-30170987	Chr5:30556390-30556471	Chr5:30288890-30292683	Chr5:30420457-30420538	Chr5:30179742-30179823	Chr5:30265779-30265860	Chr5:30402504-30402585	Chr5:30406012-30406093	Chr5:30450798-30454425	Chr5:29924386-29928160	Chr5:29446805-29450403	Chr5:29873946-29877652	Chr5:30030543-30034259	0	0	0	0
ONG0500610	Chr5:30619076-30619172	Chr5:30624092-30624186	Chr5:30441059-30441155	Chr5:30253603-30253699	Chr5:30639134-30639230	Chr5:30360826-30360922	Chr5:30503071-30503167	Chr5:30262496-30262592	Chr5:30346495-30346591	Chr5:30484139-30484235	Chr5:30488709-30488805	Chr5:30522566-30522662	Chr5:29996329-29996425	Chr5:29518544-29518640	Chr5:29945803-29945899	Chr5:30102422-30102518	Chr5:26009518-26009614	Chr5:25840284-25840380	Chr5:29947159-29947255	Chr5:29760439-29760535
ONG0600010	0	0	0	0	Chr6:311378-311609	0	0	0	0	0	0	Chr6:504269-504500	Chr6:474545-474776	Chr6:450587-450818	Chr6:479710-479941	Chr6:457802-458033	0	0	0	0
ONG0600020	Chr6:1263029-1268028	Chr6:998706-1000560	Chr6:1012538-1014386	Chr6:1140450-1141914	Chr6:956441-969370	Chr6:962187-975109	Chr6:1772223-1773938	Chr6:1009489-1011343	Chr6:966862-968554	Chr6:1014108-1015822	Chr6:1252122-1257135	Chr6:1365756-1370765	Chr6:1119757-1132704	Chr6:1095046-1107974	Chr6:1125047-1137975	Chr6:1112276-1125185	0	0	0	Chr6:1068323-1070175
ONG0600030	Chr6:2705161-2705254	Chr6:2389775-2389868	Chr6:2480995-2481088	Chr6:2504652-2504745	Chr6:2408683-2408776	Chr6:2414316-2414409	Chr6:3218323-3218416	Chr6:2414207-2414300	Chr6:2442923-2443016	Chr6:2469804-2469897	Chr6:2612155-2612248	Chr6:2693208-2693301	Chr6:2571243-2571336	Chr6:2543951-2544044	Chr6:2577879-2577972	Chr6:2644031-2644124	0	0	0	0
ONG0600040	Chr6:3939544-3939597	Chr6:3605825-3605878	Chr6:3738542-3738595	0	Chr6:3634316-3634369	Chr6:3639917-3639970	Chr6:4411464-4411517	Chr6:3635283-3635336	Chr6:3671118-3671171	0	0	Chr6:3956752-3956805	Chr6:3808554-3808607	Chr6:3783400-3783453	Chr6:3788919-3788972	Chr6:3838115-3838168	Chr6:3717072-3717125	Chr6:3503782-3503835	0	0
ONG0600050	Chr6:4123857-4124519	Chr6:3790298-3790960	Chr6:3922937-3923588	Chr6:3898486-3899137	Chr6:3818837-3819500	Chr6:3824430-3825092	Chr6:4596000-4596665	Chr6:3819726-3820381	Chr6:3855573-3856235	Chr6:3907649-3908300	Chr6:4078467-4079118	Chr6:4141304-4141966	Chr6:3993116-3993778	Chr6:4005981-4006643	Chr6:3973429-3974092	Chr6:4022763-4023425	Chr6:3927524-3928179	Chr6:3714724-3715376	Chr6:3885839-3886495	0
ONG0600060	Chr6:4187616-4190558	Chr6:3853998-3856940	Chr6:3986658-3989600	Chr6:3962133-3965075	Chr6:3882542-3885484	Chr6:3887943-3890885	Chr6:4659533-4662475	Chr6:3883437-3886379	Chr6:3919214-3922156	Chr6:3971011-3973953	Chr6:4141409-4144351	Chr6:4204809-4207751	Chr6:4056568-4059510	Chr6:4069429-4072371	Chr6:4036938-4039880	Chr6:4086255-4089197	Chr6:3990009-3992948	Chr6:3777217-3780156	Chr6:3950945-3953885	Chr6:3940044-3942986	Chr6:3468778-3471764
ONG0600070	Chr6:4788660-4788775	Chr6:4454854-4454969	Chr6:4673044-4673159	Chr6:4564531-4564646	Chr6:4457895-4458010	Chr6:4446648-4446763	Chr6:5216491-5216606	Chr6:4485835-4485950	Chr6:4513942-4514057	Chr6:4598129-4598244	Chr6:4766880-4766995	Chr6:4836205-4836320	Chr6:4666030-4666145	Chr6:4675799-4675914	Chr6:4665985-4666100	Chr6:4641819-4641934	Chr6:4540738-4540854	Chr6:4323681-4323797	Chr6:4595083-4595199	0
ONG0600080	Chr6:5035205-5035273	0	0	Chr6:4811209-4811277	Chr6:4691265-4691333	Chr6:4689010-4689078	0	0	0	Chr6:4857418-4857486	Chr6:5013252-5013320	Chr6:5078634-5078702	0	Chr6:4924697-4924765	Chr6:4914487-4914555	Chr6:4875734-4875802	0	0	0	0
ONG0600090	Chr6:5610500-5610655	Chr6:5246718-5246873	Chr6:5464686-5464841	Chr6:5396697-5396852	Chr6:5265576-5265731	Chr6:5263569-5263724	Chr6:5996089-5996244	Chr6:5318766-5318921	Chr6:5326949-5327104	Chr6:5432314-5432469	Chr6:5587281-5587436	Chr6:5658922-5659017	Chr6:5488725-5488880	Chr6:5513240-5513395	Chr6:5488092-5488187	Chr6:5449804-5449959	0	0	0	0
ONG0600100	Chr6:5994314-5994686	Chr6:5632752-5633123	Chr6:5837317-5837689	Chr6:5799555-5799927	Chr6:5639048-5639419	Chr6:5650680-5651052	Chr6:6372672-6373043	Chr6:5696359-5696730	Chr6:5704450-5704821	Chr6:5792435-5792807	Chr6:5944318-5944690	Chr6:6067653-6068025	Chr6:5834902-5835273	Chr6:5858983-5859354	Chr6:5897064-5897436	Chr6:5858863-5859234	Chr6:5829815-5830186	Chr6:5626190-5626561	Chr6:5795929-5796300	0
ONG0600110	Chr6:6798967-6799058	Chr6:6372535-6372626	Chr6:6602660-6602750	Chr6:6543798-6543889	Chr6:6369227-6369318	Chr6:6659756-6659847	Chr6:7113076-7113167	Chr6:6442659-6442750	Chr6:6444874-6444965	Chr6:6573794-6573885	Chr6:6721941-6722032	Chr6:6878418-6878509	Chr6:6603694-6603785	Chr6:6627164-6627255	Chr6:6707493-6707584	Chr6:6674438-6674529	Chr6:6551300-6551391	Chr6:6357559-6357650	Chr6:6649875-6649966	0
ONG0600120	Chr6:6861565-6861761	Chr6:6434385-6434581	Chr6:6677326-6677522	Chr6:6618964-6619163	Chr6:6444731-6444927	Chr6:6721604-6721800	Chr6:7173813-7174009	Chr6:6518034-6518230	Chr6:6505599-6505795	Chr6:6635419-6635614	Chr6:6783484-6783679	Chr6:6939127-6939323	Chr6:6665531-6665727	Chr6:6687891-6688087	Chr6:6769344-6769540	Chr6:6734492-6734688	0	0	0	0
ONG0600130	Chr6:7182184-7182593	Chr6:6748248-6748662	Chr6:6972115-6972525	Chr6:6939898-6940308	Chr6:6775260-6775669	Chr6:7035473-7035887	Chr6:7486562-7486971	Chr6:6812446-6812856	Chr6:6818322-6818731	Chr6:6952829-6953239	Chr6:7093360-7093770	Chr6:7252135-7252549	Chr6:6979412-6979826	Chr6:7001742-7002156	Chr6:7083267-7083681	Chr6:7036746-7037156	Chr6:6945022-6945432	Chr6:6741576-6741982	Chr6:7079461-7079921	0
ONG0600140	Chr11:29270356-29270617,Chr11:17784860-17785124,Chr11:17032792-17033056,Chr11:17830070-17830334	Chr11:17819473-17819737,Chr4:22273033-22273284,Chr11:18621180-18621444	Chr11:30796992-30797256,Chr11:19139905-19140169	Chr11:29035670-29035931,Chr11:18364406-18364670	Chr11:18438898-18439162,Chr11:19240482-19240746	Chr11:18126287-18126551,Chr11:18902908-18903172	Chr11:17389192-17389456,Chr11:18166510-18166774	Chr11:18444042-18444306,Chr11:19217201-19217465,Chr11:30339111-30339372	Chr11:17371525-17371789,Chr11:18175386-18175650	Chr6:7514863-7515124,Chr11:16999215-16999479,Chr11:17856864-17857128	Chr6:7648914-7649175,Chr11:18130972-18131236	Chr6:7684849-7685110,Chr11:16644814-16649828	Chr6:7412264-7412525,Chr11:16555248-16555512,Chr11:17294053-17294317,Chr11:17339280-17339544	Chr6:7434474-7434735,11:16530620-16530878	Chr6:7516390-7516651,Chr11:15991848-15996863	Chr6:7498368-7498623,Chr11:15995118-15995376	Chr6:7493388-7493649	Chr6:7281754-7282015	0	0
ONG0600150	Chr6:7686853-7686950	Chr6:7174374-7174471	Chr6:7432610-7432707	Chr6:7434456-7434553	Chr6:7228730-7228827	Chr6:7541613-7541710	Chr6:7976196-7976293	Chr6:7306996-7307093	Chr6:7307131-7307228	Chr6:7586363-7586460	Chr6:7719799-7719896	Chr6:7730208-7730305	Chr6:7457610-7457707	Chr6:7479847-7479944	Chr6:7561761-7561858	Chr6:7568886-7568983	Chr6:7540868-7540965	Chr6:7329234-7329331	Chr6:7715717-7715814	Chr6:7645167-7645259
ONG0600160	Chr6:8608082-8608199	Chr6:8109482-8109599	Chr6:8410909-8411026	Chr6:8404101-8404218	Chr6:8149232-8149349	Chr6:8460348-8460465	Chr6:8914902-8915019	Chr6:8292139-8292256	Chr6:8308417-8308534	Chr6:8492696-8492813	Chr6:8599338-8599455	Chr6:8607942-8608059	Chr6:8333903-8334020	Chr6:8415167-8415284	Chr6:8438073-8438190	Chr6:8449328-8449445	Chr6:8454469-8454586	Chr6:8242541-8242658	Chr6:8752935-8753052	Chr6:8751150-8751265
ONG0600170	Chr6:9618284-9622812	Chr6:9216523-9221050	Chr6:9102834-9107361	Chr6:9477097-9481624	Chr6:9195360-9199888	Chr6:9257523-9262053	Chr6:9669174-9673694	Chr6:9089758-9094276	Chr6:9316173-9320701	Chr6:9313173-9317694	Chr6:9414827-9419346	Chr6:9418465-9422985	Chr6:9143416-9147936	Chr6:9348004-9352524	Chr6:9239308-9243832	Chr6:9257442-9261962	0	0	0	0
ONG0600180	0	0	0	0	0	0	0	0	0	0	0	0	0	Chr6:9704433-9704540	0	0	Chr6:9449131-9449231	Chr6:9316145-9316245	Chr6:9955805-9955912	0
ONG0600190	0	0	0	0	0	0	0	0	0	0	0	0	0	Chr6:9745240-9745713	0	0	0	0	0	0
ONG0600200	Chr6:11283272-11283607	Chr6:10881583-10881918	Chr6:10729019-10729354	Chr6:11491543-11491873	Chr6:10841994-10842329	Chr6:10900668-10901003	Chr6:11080774-11081109	Chr6:10707168-10707498	Chr6:11089546-11089881	Chr6:10833094-10833429	Chr6:10948537-10948872	Chr6:10909520-10909855	Chr6:10666691-10667026	Chr6:11160598-11160932	Chr6:10761007-10761342	Chr6:10822178-10822513	Chr6:10523040-10523375	Chr6:10406375-10406710	Chr6:11242129-11242464	Chr6:11215385-11215719
ONG0600210	Chr6:11489099-11489510	Chr6:11087383-11087794	Chr6:10983744-10984158	Chr6:11752195-11752606	Chr6:11048003-11048414	Chr6:11106552-11106963	Chr6:11286705-11287116	Chr6:10968814-10969225	0	Chr6:11028838-11029252	Chr6:11143251-11143665	Chr6:11105109-11105523	0	Chr6:11347630-11348044	Chr6:10950991-10951405	Chr6:11018254-11018668	Chr6:10764638-10765052	Chr6:10647240-10647654	0	0
ONG0600220	Chr6:11829664-11829738	Chr6:11426712-11426786	Chr6:11343878-11343952	Chr6:12096081-12096155	Chr6:11399074-11399148	Chr6:11457624-11457698	Chr6:11637744-11637818	Chr6:11323845-11323919	Chr6:11602741-11602815	Chr6:11430235-11430309	Chr6:11542318-11542392	Chr6:11496986-11497060	Chr6:11160622-11160696	Chr6:11738128-11738202	Chr6:11356270-11356344	Chr6:11409551-11409625	Chr6:11115807-11115954	Chr6:10990423-10990570	Chr6:11946051-11946198	0
ONG0600230	Chr6:11869647-11870032	0	0	0	0	0	0	0	Chr6:11642474-11642859	0	0	Chr6:11539551-11539936,Chr4:19453658-19454043	Chr6:11206547-11206932	Chr6:11780679-11781064	Chr6:11398851-11399236	Chr6:11451666-11452051	0	0	0	0
ONG0600240	Chr6:12309488-12309787	Chr6:11953658-11953957	Chr6:11927974-11928273	Chr6:12566746-12567053	Chr6:11829996-11830294	Chr6:11888498-11888797	Chr6:12061034-12061333	Chr6:11754795-11755093	Chr6:12081540-12081839	Chr6:11891200-11891507	Chr6:11986205-11986512	Chr6:11975329-11975632	Chr6:11598556-11598863	Chr6:12202201-12202504	Chr6:11838596-11838899	Chr6:11875674-11875981	Chr6:11459805-11460105	Chr6:11330804-11331104	Chr6:12524682-12524988	0
ONG0600250	Chr6:12570406-12595861	Chr6:12214622-12240084	Chr6:12188900-12214356	Chr6:12832971-12858371	Chr6:12090867-12116304	Chr6:12149399-12174861	Chr6:12321011-12346468	Chr6:12015752-12041196	Chr6:12342408-12367869	Chr6:12149022-12174489	Chr6:12261459-12286905	Chr6:12267920-12299228	Chr6:11878074-11903541	Chr6:12505797-12537132	Chr6:12170980-12202282	Chr6:12142272-12167729	Chr6:11670430-11695942	0	Chr6:12233566-12259333	0
ONG0600260	Chr6:12785481-12788701	Chr6:12429738-12432959	Chr6:12403592-12406813	Chr6:13047915-13051135	Chr6:12305900-12309121	Chr6:12364449-12367670	Chr6:12536064-12539285	Chr6:12230771-12233980	Chr6:12557392-12560613	Chr6:12357628-12360852	Chr6:12454937-12457832	Chr6:12506510-12509730	Chr6:12118732-12121952	Chr6:12744715-12747935	Chr6:12410111-12413331	Chr6:12357279-12360498	Chr6:11881314-11884532	Chr6:11724337-11727559	Chr6:12835031-12838252	0
ONG0600270	Chr6:18842537-18842656	Chr6:18450170-18450289	Chr6:18524942-18525061	Chr6:19104501-19104620	Chr6:18340397-18340516	Chr6:18533047-18533166	Chr6:18703348-18703467	Chr6:18391740-18391859	Chr6:18628481-18628600	Chr6:17984576-17984695	Chr6:18379387-18379506	Chr6:17282195-17282314	Chr6:17745270-17745389	Chr6:13251178-13251297	Chr6:17209495-17209614	Chr6:18474703-18474822	Chr6:17472933-17476367	Chr6:17018041-17021478	Chr6:19386886-19387005	0
ONG0600280	Chr6:18720729-18720863	Chr6:18328415-18328549	Chr6:18403950-18404084	Chr6:18982716-18982850	Chr6:18218580-18218714	Chr6:18411329-18411463	Chr6:18581627-18581761	Chr6:18270000-18270134	Chr6:18506686-18506820	Chr6:17862763-17862897	Chr6:18251511-18251645	Chr6:17164042-17164176	Chr6:17620651-17620785	Chr6:13365415-13365549	Chr6:17095717-17095851	Chr6:18352946-18353080	Chr6:17349473-17349607	Chr6:16894255-16894389	Chr6:19248259-19248398	0
ONG0600290	Chr6:18649182-18649372	Chr6:18256870-18257060	Chr6:18332441-18332631	Chr6:18911280-18911470	Chr6:18144936-18145126	Chr6:18339863-18340053	Chr6:18510158-18510348	Chr6:18198519-18198709	Chr6:18433052-18433242	Chr6:17791218-17791408	Chr6:18182753-18182943	Chr6:17118953-17119143	Chr6:17574349-17574539	Chr6:13410446-13410636	Chr6:17050650-17050840	Chr6:18281400-18281590	Chr6:17140890-17141080	Chr6:16697480-16697670	Chr6:19189731-19189921	Chr6:17980156-17980346
ONG0600300	Chr6:18571936-18572316	Chr6:18179639-18180019	Chr6:18255223-18255603	Chr6:18834067-18834447	Chr6:18067688-18068068	Chr6:18262648-18263028	Chr6:18432943-18433323	Chr6:18121255-18121635	Chr6:18355818-18356198	Chr6:17713963-17714343	Chr6:18106474-18106854	Chr6:17054779-17055213	Chr6:17487843-17488277	Chr6:13474365-13474799	Chr6:16986441-16986875	Chr6:18204171-18204551	Chr6:17206656-17207090	Chr6:16803507-16803941	Chr6:19123197-19123631	Chr6:16486870-16487303
ONG0600310	Chr6:18293008-18294716	Chr6:17900539-17902247	Chr6:17976252-17977960	Chr6:18560078-18561792	Chr6:17777590-17779289	Chr6:17983650-17985358	Chr6:18153909-18155617	Chr6:17842122-17843821	Chr6:18081797-18083505	Chr6:17434829-17436537	Chr6:17827997-17829641	Chr6:16814285-16815994	Chr6:17242241-17243949	Chr6:13713678-13715387	Chr6:16739809-16741518	Chr6:17921546-17923254	Chr6:16950365-16952075	Chr6:16497630-16499340	Chr6:18831358-18833070	Chr6:17434326-17436037
ONG0600320	Chr6:18274338-18274488	Chr6:17881867-17882017	Chr6:17957582-17957732	Chr6:18541409-18541559	Chr6:17758921-17759071	Chr6:17964981-17965131	Chr6:18135240-18135390	Chr6:17823453-17823603	Chr6:18063128-18063278	Chr6:17416162-17416312	Chr6:17809470-17809620	Chr6:16795671-16795821	Chr6:17223659-17223809	Chr6:13733850-13734000	Chr6:16721198-16721348	Chr6:17902874-17903024	Chr6:16931843-16931993	Chr6:16479108-16479258	Chr6:18812870-18813020	Chr6:17468993-17469143
ONG0600330	Chr6:18202151-18202392,VXJH01000041.1:146178-146417	Chr6:17809594-17809835	Chr6:17880529-17880770	Chr6:18469213-18469454	Chr6:17686715-17686956	Chr6:17892797-17893038	Chr6:18063049-18063290	Chr6:17751254-17751495	Chr6:17990922-17991163	Chr6:17343979-17344220	Chr6:17737338-17737579	Chr6:16730319-16730560	Chr6:17154357-17154598	Chr6:13799547-13799788	Chr6:16655878-16656119	Chr6:17830677-17830918	Chr6:16864833-16865077	Chr6:16413225-16413469	Chr6:18700824-18701117	0
ONG0600340	Chr6:17655475-17656208	Chr6:17261980-17262713	Chr6:17406495-17407228	Chr6:17940075-17940808	Chr6:17165665-17166398	Chr6:17372998-17373731	Chr6:17543197-17543930	Chr6:17231388-17232121	Chr6:17454339-17455072	Chr6:16836907-16837640	Chr6:17210015-17210748	Chr6:16339803-16340536	Chr6:16702672-16703405	Chr6:14189290-14190023	Chr6:16265316-16266049	Chr6:17308072-17308805	Chr6:16506863-16507596	Chr6:16038203-16038936	Chr6:17616032-17616767	Chr6:16727534-16728265
ONG0600350	Chr6:17163425-17167140	Chr6:16790725-16794439	Chr6:16815405-16819105	Chr6:17453014-17456728	Chr6:16687410-16691127	Chr6:16692201-16695915	Chr6:16863428-16867142	Chr6:16550390-16554104	Chr6:16941890-16945608	Chr6:16301921-16305862	Chr6:16730738-16734455	Chr6:15980427-15984224	Chr6:16305899-16309615	Chr6:14545578-14549375	Chr6:15905871-15909668	Chr6:16639691-16643405	Chr6:16083736-16084552	Chr6:15671273-15674696	Chr6:18433423-18437417	Chr6:17107867-17111837
ONG0600360	Chr6:15073441-15073651	Chr6:14720440-14720650	Chr6:14538719-14538927	Chr6:15348484-15348694	Chr6:14617829-14618039	Chr6:14506585-14506793	Chr6:14677938-14678146	Chr6:14367928-14368136	Chr6:14857280-14857490	Chr6:14256498-14256708	Chr6:14691360-14691570	Chr6:14720775-14720985	Chr6:14180417-14180627	Chr6:15796558-15796768	Chr6:14612381-14612591	Chr6:14481670-14481878	Chr6:13694552-13694762	Chr6:13546568-13546778	Chr6:14863173-14863383	Chr6:14878387-14878597
ONG0600370	Chr6:15443696-15443784	Chr6:15090755-15090843	Chr6:14868773-14868861	Chr6:15708965-15709053	Chr6:14992932-14993020	Chr6:14832464-14832552	Chr6:15003767-15003855	Chr6:14693970-14694058	Chr6:15227457-15227545	Chr6:14495740-14495828	Chr6:15030140-15030228	Chr6:14485832-14485920	Chr6:14618543-14618631	Chr6:16031659-16031747	Chr6:14377507-14377595	Chr6:14807293-14807381	0	Chr6:13717971-13718059	Chr6:15093514-15093602	0
ONG0600380	Chr6:15467107-15468709	Chr6:15114329-15115931	Chr6:14888473-14890075	Chr6:15732531-15734133	Chr6:15016409-15018011	Chr6:14852150-14853752	Chr6:15023479-15025081	Chr6:14713702-14715304	Chr6:15251015-15252617	Chr6:14514916-14516517	Chr6:15053430-15054993	Chr6:14460159-14461761	Chr6:14641044-14642646	Chr6:16055453-16057055	Chr6:14351672-14353274	Chr6:14826982-14828584	0	0	Chr6:15110273-15111872	0
ONG0600390	Chr6:14681090-14681175	Chr6:14328067-14328152	Chr6:14173019-14173104	Chr6:14951762-14951847	Chr6:14225495-14225580	Chr6:14139067-14139152	Chr6:14310374-14310459	Chr6:14000359-14000445	Chr6:14464991-14465076	Chr6:13979997-13980082	Chr6:14301017-14301102	Chr6:14142921-14143006	Chr6:13810733-13810818	Chr6:16366541-16366626	Chr6:14041009-14041094	Chr6:14114009-14114094	Chr6:13414569-13414654	Chr6:13269788-13269873	Chr6:14544166-14544251	0
ONG0600400	Chr6:14672375-14672485	Chr6:14319352-14319462	Chr6:14163494-14163604	Chr6:14943045-14943155	Chr6:14216780-14216890	Chr6:14129540-14129650	Chr6:14300849-14300959	Chr6:13990834-13990944	Chr6:14456277-14456387	Chr6:13971276-13971386	Chr6:14292295-14292405	Chr6:14134207-14134317	Chr6:13802013-13802123	Chr6:16375230-16375340	Chr6:14032295-14032405	Chr6:14104484-14104594	Chr6:13405846-13405956	Chr6:13261065-13261175	Chr6:14535550-14535660	0
ONG0600410	0	0	0	0	0	0	0	0	0	0	0	Chr6:13767613-13767805	0	Chr6:16741590-16741782	Chr6:13665706-13665898	0	0	0	0	0
ONG0600420	Chr6:14060655-14060962	Chr6:13707578-13707885	Chr6:13681590-13681897	Chr6:14328329-14328636	Chr6:13589051-13589358	Chr6:13647478-13647785	Chr6:13819130-13819437	Chr6:13508783-13509090	Chr6:13836634-13836941	Chr6:13570675-13570972	Chr6:13684234-13684541	Chr6:13687042-13687349	Chr6:13279166-13279473	Chr6:16822071-16822378	Chr6:13585372-13585679	Chr6:13622652-13622959	0	0	0	0
ONG0600430	Chr6:13751784-13752116	Chr6:13398602-13398934	Chr6:13373459-13373791	Chr6:14019246-14019578	Chr6:13279505-13279837	Chr6:13337971-13338303	Chr6:13509629-13509961	Chr6:13199228-13199560	Chr6:13527828-13528160	Chr6:13274269-13274601	Chr6:13377910-13378242	Chr6:13359250-13359583	Chr6:12982514-12982846	Chr6:17149878-17150211	Chr6:13257620-13257953	Chr6:13313048-13313380	Chr6:12720620-12720953	Chr6:12539521-12539841	Chr6:13748387-13748718	Chr6:13451314-13451639
ONG0600440	Chr6:13583363-13583458	Chr6:13229978-13230073	Chr6:13205051-13205146	Chr6:13850747-13850842	Chr6:13122889-13122984	Chr6:13181386-13181481	Chr6:13353040-13353135	Chr6:13042628-13042723	Chr6:13359475-13359570	Chr6:13105637-13105732	Chr6:13210614-13210709	Chr6:13213078-13213173	Chr6:12809331-12809426	Chr6:17296309-17296404	Chr6:13111368-13111463	Chr6:13156456-13156551	Chr6:12556053-12556142	Chr6:12372084-12372173	Chr6:13552524-13552619	0
ONG0600450	Chr6:13322890-13322976	Chr6:12972256-12972342	Chr6:12944958-12945044	Chr6:13590584-13590670	Chr6:12853748-12853834	Chr6:12912257-12912343	Chr6:13083911-13083997	Chr6:12773407-12773493	Chr6:13100157-13100243	Chr6:12850545-12850631	Chr6:12948319-12948405	Chr6:12954881-12954967	Chr6:12555778-12555864	Chr6:17545572-17545658	Chr6:12858379-12858465	Chr6:12899733-12899819	Chr6:12347393-12347479	Chr6:12170277-12170363	Chr6:13297832-13297918	0
ONG0600460	Chr6:19257720-19257788	Chr6:18874825-18874893	Chr6:18944902-18944970	Chr6:19519832-19519900	Chr6:18756211-18756279	Chr6:18954106-18954174	Chr6:19124463-19124531	Chr6:18812923-18812991	Chr6:19074597-19074665	Chr6:18389988-18390056	Chr6:18808979-18809047	Chr6:17854701-17854769	Chr6:18224189-18224257	Chr6:17871913-17871981	Chr6:17591671-17591739	Chr6:18922641-18922709	Chr7:18729256-18729324	0	Chr6:19972823-19972891	0
ONG0600470	Chr6:19356456-19356671	Chr6:18969575-18969790	Chr6:19039757-19039972	Chr6:19618582-19618797	Chr6:18854954-18855169	Chr6:19052843-19053058	Chr6:19223202-19223417	Chr6:18911664-18911879	Chr6:19173338-19173553	Chr6:18488721-18488936	Chr6:18919577-18919792	Chr6:17957478-17957694	Chr6:18326958-18327174	Chr6:17971073-17971288	Chr6:17690768-17690983	Chr6:19029743-19029958	Chr6:17956024-17956239	Chr6:17531593-17531808	Chr6:20077869-20078084	0
ONG0600480	Chr6:20097540-20098675	Chr6:19777998-19779131	Chr6:19801589-19802724	Chr6:20390929-20392064	Chr6:19569408-19570545	Chr6:19785018-19786153	Chr6:19954783-19955918	Chr6:19652990-19654126	Chr6:19935941-19937076	Chr6:19233629-19234765	Chr6:19666193-19667326	Chr6:18896677-18897810	Chr6:19272585-19273718	Chr6:18949585-18950718	Chr6:18646552-18647685	Chr6:19856720-19857855	0	0	0	0
ONG0600490	0	Chr6:20836173-20838305	0	0	0	Chr6:20834897-20837029	Chr6:21004661-21006793	Chr6:20702770-20704902	Chr6:21008262-21010394	Chr6:20285785-20285992	Chr6:20637275-20637483	Chr6:19816306-19818384	Chr6:20175625-20177703	Chr6:19861650-19863742	Chr6:19558662-19560754	Chr6:20702963-20703170	Chr6:19260141-19262270	Chr6:18853811-18855936	Chr6:21686540-21688679	0
ONG0600500	Chr6:21704845-21704933	Chr6:21368536-21368624	Chr6:21471606-21471694	Chr6:21966863-21966951	Chr6:21153709-21153797	Chr6:21359897-21359985	Chr6:21529328-21529416	Chr6:21227767-21227855	Chr6:21552246-21552334	Chr6:20854944-20855032	Chr6:21198286-21198374	Chr6:20471475-20471566	Chr6:20822048-20822139	Chr6:20506972-20507063	Chr6:20217625-20217713	Chr6:21239297-21239385	Chr6:19873536-19873627	Chr6:19470172-19470263	Chr6:22365607-22365697	0
ONG0600510	Chr6:22123022-22123175	Chr6:21726832-21726985	Chr6:21873680-21873830	Chr6:22356881-22357034	Chr6:21511994-21512147	Chr6:21750062-21750215	Chr6:21919504-21919657	Chr6:21617932-21618085	Chr6:21910480-21910633	Chr6:21212260-21212413	Chr6:21553329-21553482	Chr6:20978107-20978260	Chr6:21395123-21395276	Chr6:20891024-20891177	Chr6:20697089-20697242	Chr6:21629493-21629646	Chr6:20186950-20187103	Chr6:19781334-19781487	Chr6:22725865-22726022	Chr6:21686328-21686485	Chr6:26832219-26832364
ONG0600520	Chr6:22490313-22490687	Chr6:22114250-22114624	Chr6:22263231-22263605	Chr6:22754336-22754709	Chr6:21901388-21901762	Chr6:22140359-22140733	Chr6:22291868-22292242	Chr6:22008245-22008619	Chr6:22301432-22301807	Chr6:21578785-21579160	Chr6:21919406-21919781	Chr6:21333976-21334351	Chr6:21750998-21751373	Chr6:21246251-21246626	Chr6:21053166-21053541	Chr6:22014481-22014855	Chr6:20520473-20520848	Chr6:20121452-20121828	Chr6:23103858-23104233	0
ONG0600530	Chr6:22821584-22821844	Chr6:22473784-22474053	Chr6:22592764-22593031	Chr6:23085535-23085795	Chr6:22232674-22232934	Chr6:22471152-22471419	Chr6:22622675-22622942	Chr6:22339132-22339399	Chr6:22658103-22658370	Chr6:21928943-21929203	Chr6:22267361-22267621	Chr6:21685451-21685718	Chr6:22101887-22102154	Chr6:21597404-21597671	Chr6:21411380-21411647	Chr6:22368885-22369198	Chr6:20867723-20867980	Chr6:20515365-20515622	Chr6:23507831-23508087	0
ONG0600540	Chr6:23313627-23313828	Chr6:23047755-23047955	Chr6:23083204-23083405	Chr6:23565548-23565749	Chr6:22712579-22712780	Chr6:22963141-22963338	Chr6:23114668-23114864	Chr6:22831146-22831343	Chr6:23150063-23150260	Chr6:22456633-22456832	Chr6:22793302-22793501	Chr6:22197919-22198116	Chr6:22589657-22589858	Chr6:22088263-22088460	Chr6:21923837-21924034	Chr6:22837477-22837676	Chr6:21326324-21326524	Chr6:20971210-20971410	Chr6:23990019-23990218	0
ONG0600550	0	0	0	0	0	0	0	0	0	0	0	0	0	Chr6:22564482-22564538	0	0	Chr6:21589744-21589799	0	0	0
ONG0600560	0	0	0	0	0	0	0	0	0	0	0	Chr6:23013859-23014052	Chr6:23364395-23364588	Chr6:22860085-22860278	Chr6:22629361-22629554	Chr6:23915482-23915675	0	0	0	0
ONG0600570	0	0	0	0	0	0	0	0	0	0	0	0	0	Chr6:23251199-23251335	0	0	0	0	0	0
ONG0600580	Chr6:24974857-24974996	Chr6:24755211-24755350	Chr6:24806562-24806701	Chr6:25333420-25333559	Chr6:24444035-24444174	Chr6:24660220-24660359	Chr6:24733533-24733672	Chr6:24599591-24599730	Chr6:24859921-24860060	Chr6:24225944-24226083	Chr6:24366399-24366538	Chr6:23715339-23715478	Chr6:24250036-24250175	0	Chr6:23316601-23316740	Chr6:24481519-24481658	0	0	0	0
ONG0600590	Chr6:25067764-25067888	Chr6:24851602-24851724	Chr6:24906158-24906280	Chr6:25426240-25426364	Chr6:24532175-24532271	Chr6:24748398-24748494	Chr6:24821709-24821805	Chr6:24692434-24692558	Chr6:24959492-24959614	Chr6:24308926-24309048	Chr6:24449084-24449206	Chr6:23808147-23808271	Chr6:24342847-24342971	Chr6:23688262-23688386	Chr6:23409402-23409526	Chr6:24564359-24564481	Chr6:22590035-22590157	Chr6:22217468-22217590	Chr6:25546623-25546710	0
ONG0600600	Chr6:25090287-25094540	Chr6:24877480-24877849	Chr6:24928151-24932390	Chr6:25448291-25452536	Chr6:24558054-24558423	Chr6:24774274-24774643	Chr6:24847585-24847954	Chr6:24714473-24718712	Chr6:24981483-24985725	Chr6:24330922-24335142	Chr6:24470488-24474726	Chr6:23830679-23834933	Chr6:24365379-24369632	Chr6:23710795-23715049	Chr6:23431934-23436188	Chr6:24586355-24590574	Chr6:22615998-22616369	Chr6:22243392-22243762	Chr6:25568539-25573292	0
ONG0600610	Chr6:25916268-25916579	Chr6:25662010-25662321	Chr6:25747258-25747569	Chr6:26286986-26287297	Chr6:25387653-25387964	Chr6:25600123-25600434	Chr6:25650208-25650519	Chr6:25534479-25534790	Chr6:25787926-25788407	Chr6:25154607-25155088	Chr6:25290947-25291428	Chr6:24656061-24656392	Chr6:25191141-25191472	Chr6:24554697-24555028	Chr6:24281265-24281596	Chr6:25367456-25367937	Chr6:23352426-23352758	Chr6:22989542-22989874	0	0
ONG0600620	Chr6:26078980-26079061	Chr6:25825056-25825137	Chr6:25910211-25910292	Chr6:26449423-26449504	Chr6:25550607-25550688	Chr6:25768116-25768197	Chr6:25818228-25818309	Chr6:25702536-25702617	Chr6:26014031-26014112	Chr6:25317901-25317982	Chr6:25520724-25520805	Chr6:24823907-24823988	Chr6:25358936-25359017	Chr6:24717247-24717328	Chr6:24449006-24449087	Chr6:25567375-25567456	0	0	Chr6:26699680-26699761	0
ONG0600630	Chr6:27133940-27134478	Chr6:26809253-26809791	Chr6:26881559-26882097	Chr6:27481872-27482407	Chr6:26544237-26544775	Chr6:26803026-26803564	Chr6:26843478-26844016	Chr6:26708957-26709495	Chr6:26997706-26998244	Chr6:26303165-26303703	Chr6:26544537-26545075	Chr6:25846941-25847479	Chr6:26386541-26387079	Chr6:25683166-25683704	Chr6:25469961-25470499	Chr6:26546843-26547381	Chr6:24367693-24368231	Chr6:24008386-24008923	0	0
ONG0600640	0	0	0	0	0	0	0	0	0	0	0	Chr6:25956138-25956266	Chr6:26495553-26495681	Chr6:25792192-25792320	Chr6:25578964-25579092	Chr6:26655897-26656025	0	0	0	0
ONG0600650	Chr6:27418428-27422284	Chr6:27098841-27102710	Chr6:27166287-27170144	Chr6:27766268-27770199	Chr6:26840104-26843958	Chr6:27098951-27102805	Chr6:27139426-27143280	Chr6:26993677-26997531	Chr6:27282013-27285868	Chr6:26584044-26587913	Chr6:26827706-26831560	Chr6:26172798-26176662	Chr6:26706817-26710679	Chr6:26008787-26012649	Chr6:25795651-25799214	Chr6:26839428-26843283	Chr6:24648026-24651884	Chr6:24291657-24295514	Chr6:27939403-27943150	Chr6:26440252-26440407
ONG0600660	Chr6:27505680-27505819	Chr6:27213388-27213579	Chr6:27253587-27253726	Chr6:27871155-27871345	Chr6:26927406-26927545	Chr6:27186253-27186392	Chr6:27226730-27226869	Chr6:27080986-27081125	Chr6:27386739-27386929	Chr6:26695054-26695243	Chr6:26914263-26914402	Chr6:26283328-26283515	Chr6:26817620-26817807	Chr6:26095341-26095532	Chr6:25883019-25883206	Chr6:26944209-26944399	Chr6:24740256-24740445	Chr6:24384148-24384337	Chr6:28122890-28123081	0
ONG0600670	0	0	0	0	0	0	0	0	0	0	0	Chr6:26610647-26610718	Chr6:27148225-27148296	Chr6:26426087-26426158	Chr6:26213655-26213726	Chr6:27269050-27269121	Chr6:25035292-25035359	Chr6:24676086-24676161	Chr6:28520458-28520529	0
ONG0600680	Chr6:28401833-28401917	Chr6:28103682-28103766	Chr6:28131040-28131124	Chr6:28755055-28755139	Chr6:27812894-27812978	Chr6:28071709-28071793	Chr6:28112211-28112295	Chr6:27965887-27965971	Chr6:28278887-28278971	Chr6:27570170-27570254	Chr6:27781038-27781122	Chr6:27155873-27155957	Chr6:27692980-27693064	Chr6:26970842-26970926	Chr6:26757877-26757961	Chr6:27813668-27813752	0	0	Chr6:29062084-29062168	0
ONG0600690	Chr6:28546752-28546820	Chr6:28248798-28248866	Chr6:28276043-28276111	Chr6:28881247-28881315	Chr6:27939087-27939155	Chr6:28197896-28197964	Chr6:28238404-28238472	Chr6:28092171-28092239	Chr6:28423950-28424018	Chr6:27733977-27734045	Chr6:27924418-27924484	Chr6:27280143-27280318	Chr6:27819335-27819403	Chr6:27094977-27095152	Chr6:26882056-26882231	Chr6:27939890-27939958	Chr6:25668264-25668332	Chr6:25309909-25309977	Chr6:29203634-29203702	0
ONG0600700	Chr6:28570081-28570170	Chr6:28272212-28272301	Chr6:28299399-28299488	Chr6:28904638-28904727	Chr6:27962501-27962590	Chr6:28221308-28221397	Chr6:28261835-28261924	Chr6:28115618-28115707	Chr6:28447346-28447435	Chr6:27747059-27747150	Chr6:27937327-27937418	Chr6:27293312-27293403	Chr6:27842775-27842864	Chr6:27108097-27108188	Chr6:26895156-26895247	Chr6:27963289-27963378	Chr6:25681935-25682027	Chr6:25323472-25323564	Chr6:29217097-29217188	Chr6:27526170-27526264
ONG0600710	0	0	0	0	0	0	0	0	0	Chr6:28868248-28872455	Chr6:29062146-29066418	Chr6:28366093-28370300	Chr6:28952157-28956364	Chr6:28180108-28184315	Chr6:27960197-27964381	0	0	0	0	0
ONG0600720	Chr6:29767346-29768442	Chr6:29529904-29530972	Chr6:29587069-29588139	Chr6:30092727-30093796	Chr6:29161938-29163006	Chr6:29403469-29404537	Chr6:29377855-29378923	Chr6:29297730-29298798	Chr6:29691540-29692636	Chr6:28949302-28950398	Chr6:29143263-29144359	Chr6:28447143-28448239	Chr6:29033221-29034317	Chr6:28261156-28262252	Chr6:28041240-28042336	Chr6:29181213-29182309	0	0	0	0
ONG0600730	Chr6:29848650-29848899	Chr6:29607810-29608059	Chr6:29665042-29665291	Chr6:30170614-30170863	Chr6:29239902-29240151	Chr6:29481430-29481679	Chr6:29455822-29456071	Chr6:29375763-29376012	Chr6:29762168-29762417	Chr6:29019909-29020158	Chr6:29213848-29214097	Chr6:28517870-28518119	Chr6:29103899-29104148	Chr6:28331770-28332019	Chr6:28111935-28112184	Chr6:29266346-29266595	0	0	Chr6:30597509-30597758	0
ONG0600740	Chr6:31244542-31244681	Chr6:31001444-31001583	Chr6:31049376-31049515	Chr6:31568688-31568827	Chr6:30629740-30629879	Chr6:30930074-30930213	Chr6:30867661-30867800	Chr6:30828159-30828298	Chr6:31173829-31173968	Chr6:30452032-30452171	0	0	0	Chr6:29795527-29795666	0	0	0	0	0	Chr6:30386246-30387164
ONG0700010	0	0	0	0	Chr7:817794-817876	Chr7:812851-812933	Chr7:694876-694958	0	0	0	0	Chr7:805494-805576	Chr7:720293-720375	Chr7:727686-727768	Chr7:972593-972675	Chr7:791265-791347	Chr7:711981-712063	Chr7:719934-720016	Chr7:749338-749420	0
ONG0700020	0	Chr7:1576882-1577154	Chr7:1520980-1521252	Chr7:1526743-1527015	0	0	0	0	Chr7:1544716-1544988	0	0	0	0	Chr7:1641838-1642109	0	Chr7:1622713-1622985	0	0	0	0
ONG0700030	Chr7:2012136-2012301	0	0	0	0	0	0	0	0	0	0	0	0	Chr7:1763473-1763638	0	Chr7:1748959-1749115	0	0	0	0
ONG0700040	Chr7:2178510-2178673	Chr7:1811392-1811555	Chr7:1757282-1757445	Chr7:1762193-1762356	Chr7:1963010-1963173	Chr7:1921177-1921340	Chr7:1803195-1803358	Chr7:2144853-2145016	Chr7:1780273-1780436	0	0	Chr7:1910055-1910218	Chr7:1860445-1860608	Chr7:1903464-1903627	Chr7:2108014-2108177	0	0	0	0	Chr7:2092562-2092725
ONG0700050	0	Chr7:2098481-2098736	Chr7:2055221-2055476	Chr7:2060255-2060510	Chr7:2172223-2172478	Chr7:2130396-2130651	Chr7:2012423-2012678	Chr7:2451752-2452007	Chr7:2078277-2078532	Chr7:2384315-2384570	Chr7:2291347-2291606	Chr7:2119260-2119515	Chr7:2069549-2069804	Chr7:2112364-2112619	Chr7:2316859-2317114	Chr7:1994927-1995182	0	0	0	0
ONG0700060	Chr7:3298429-3298503	Chr7:2949932-2950006	Chr7:2908923-2908997	Chr7:2935220-2935294	Chr7:3001244-3001318	Chr7:3080895-3080969	Chr7:3074732-3074806	Chr7:3320601-3320675	Chr7:2953443-2953517	Chr7:3249845-3249919	Chr7:3150657-3150731	Chr7:3075892-3075966	Chr7:2972171-2972245	Chr7:3118543-3118617	Chr7:3247205-3247279	Chr7:2914853-2914927	0	0	0	Chr7:3324141-3324215
ONG0700070	Chr7:4248863-4249112	Chr7:3861061-3861310	Chr7:3785332-3785581	Chr7:3902651-3902901	Chr7:3951602-3951851	Chr7:3973867-3974116	Chr7:4386355-4386604	Chr7:4213912-4214161	Chr7:3907789-3908038	Chr7:4176233-4176482	Chr7:4053399-4053648	Chr7:3960946-3961195	Chr7:3856610-3856859	Chr7:4010849-4011098	Chr7:4132239-4132488	Chr7:3820743-3820992	Chr7:4199769-4200018	Chr7:4387772-4388023	0	0
ONG0700080	Chr7:4771222-4771329	Chr7:4383218-4383325	Chr7:4306383-4306490	Chr7:4414531-4414638	Chr7:4473653-4473760	Chr7:4495534-4495641	Chr7:4908297-4908404	Chr7:4736306-4736413	Chr7:4430358-4430465	Chr7:4643930-4644197	Chr7:4526793-4527060	Chr7:4428771-4429038	Chr7:4330229-4330496	Chr7:4476746-4477013	Chr7:4599640-4599907	Chr7:4288363-4288630	Chr7:4634267-4634536	Chr7:4876164-4876433	Chr7:4706156-4706425	Chr7:4867973-4868080
ONG0700090	Chr7:4875443-4875548	Chr7:4487503-4487587	Chr7:4411018-4411122	Chr7:4518147-4518252	Chr7:4577906-4578011	Chr7:4599784-4599889	Chr7:5012470-5012575	Chr7:4840548-4840653	Chr7:4534602-4534707	Chr7:4747945-4748049	Chr7:4629762-4629866	Chr7:4532900-4533004	Chr7:4433985-4434089	Chr7:4581205-4581309	Chr7:4704621-4704725	Chr7:4398092-4398196	0	0	0	0
ONG0700100	Chr7:5097199-5097343	Chr7:4709455-4709599	Chr7:4666666-4666810	Chr7:4739480-4739624	Chr7:4799748-4799892	Chr7:4834805-4834949	Chr7:5233670-5233814	Chr7:5062439-5062583	Chr7:4756397-4756541	Chr7:4966305-4966449	Chr7:4847732-4847876	Chr7:4757508-4757652	Chr7:4658526-4658670	Chr7:4798985-4799129	Chr7:4929292-4929436	Chr7:4616734-4616878	Chr7:4914321-4914465	Chr7:5149943-5150087	Chr7:5091473-5091617	0
ONG0700110	Chr7:5334861-5335006	Chr7:4946912-4947057	Chr7:4910639-4910784	Chr7:4985919-4986064	Chr7:5037190-5037335	Chr7:5072387-5072532	Chr7:5471262-5471407	Chr7:5299924-5300069	Chr7:4993942-4994087	Chr7:5224210-5224355	Chr7:5109351-5109496	Chr7:5004432-5004577	Chr7:4919341-4919486	Chr7:5045640-5045785	Chr7:5176322-5176467	Chr7:4876287-4876432	Chr7:5115991-5116136	Chr7:5343120-5343265	0	0
ONG0700120	Chr7:5666085-5666217	Chr7:5269846-5269978	Chr7:5261168-5261301	Chr7:5302157-5302289	Chr7:5359992-5360124	Chr7:5395284-5395416	Chr7:5794168-5794300	Chr7:5622813-5622945	Chr7:5316877-5317009	Chr7:5521042-5521174	Chr7:5426878-5427010	Chr7:5392092-5392224	Chr7:5307010-5307142	Chr7:5425517-5425649	Chr7:5564705-5564837	Chr7:5254763-5254895	Chr7:5459573-5459705	Chr7:5637799-5637931	0	Chr7:5766674-5766806
ONG0700130	Chr7:6167755-6168018	Chr7:5771332-5771595	Chr7:5762872-5763135	Chr7:5795592-5795855	Chr7:5826613-5826876	Chr7:5861957-5862220	Chr7:6260811-6261074	Chr7:6089467-6089730	Chr7:5783551-5783814	Chr7:5995664-5995927	Chr7:5927025-5927288	Chr7:5800519-5800762	Chr7:5715242-5715485	Chr7:5819079-5819322	Chr7:5973200-5973443	Chr7:5663459-5663702	Chr7:5855229-5855492	Chr7:6072578-6072841	Chr7:6227000-6227349	Chr7:6371343-6371606
ONG0700140	0	0	0	Chr7:6603423-6603650	0	0	0	0	0	0	0	Chr7:6577571-6577798	Chr7:6494494-6494721	Chr7:6596893-6597120	Chr7:6766745-6766972	Chr7:6455450-6455677	0	0	0	Chr7:6933319-6933546
ONG0700150	Chr7:6939064-6939143	Chr7:6545636-6545715	Chr7:6572049-6572132	0	Chr7:6601094-6601173	Chr7:6637426-6637509	Chr7:7035616-7035699	Chr7:6864977-6865060	Chr7:6571009-6571092	Chr7:6733607-6733686	Chr7:6609557-6609640	Chr7:6679968-6680051	Chr7:6597061-6597144	Chr7:6699001-6699084	Chr7:6869241-6869324	Chr7:6558030-6558102	Chr7:6568954-6569037	Chr7:6767741-6767824	0	0
ONG0700160	0	0	0	Chr7:6814891-6815222	0	0	0	0	0	Chr7:6804517-6804852	Chr7:6699276-6699611	Chr7:6767074-6767409	Chr7:6690578-6690913	Chr7:6786001-6786336	Chr7:6955075-6955410	Chr7:6641462-6641797	Chr7:6664382-6664717	Chr7:6863113-6863448	Chr7:7025107-7025438	Chr7:7181932-7182263
ONG0700170	Chr7:7070354-7070526	Chr7:6676803-6676975	Chr7:6703222-6703394	Chr7:6822127-6822237	Chr7:6732271-6732443	Chr7:6768590-6768762	Chr7:7166776-7166948	Chr7:7001407-7001579	Chr7:6702146-6702318	Chr7:6811499-6811671	Chr7:6705881-6706053	Chr7:6773728-6773900	Chr7:6697232-6697404	Chr7:6792655-6792827	Chr7:6961729-6961901	Chr7:6648446-6648618	Chr7:6671417-6671589	Chr7:6870151-6870323	Chr7:7032372-7032543	Chr7:7189056-7189166
ONG0700180	Chr7:7839479-7840387	Chr7:7459869-7460777	Chr7:7393418-7394294	Chr7:7693297-7694205	Chr7:7455731-7456639	Chr7:7551251-7552159	Chr7:7949345-7950253	0	Chr7:7485011-7485919	Chr7:7535812-7536688	Chr7:7530513-7531421	Chr7:7486160-7487036	Chr7:7517528-7518435	Chr7:7504776-7505652	Chr7:7960803-7961712	Chr7:7371044-7371919	Chr7:7345812-7346724	Chr7:7547471-7548383	Chr7:7770280-7771183	0
ONG0700190	Chr7:8404835-8405047	Chr7:8055526-8055634	Chr7:7946850-7947116	Chr7:8283089-8283355	Chr7:8021195-8021407	Chr7:8146904-8147012	Chr7:8545013-8545121	Chr7:8329636-8329848	Chr7:8080619-8080727	Chr7:8001979-8002245	Chr7:8119669-8119935	Chr7:7954375-7954641	Chr7:8053257-8053523	Chr7:7972045-7972311	Chr7:8648678-8648944	Chr7:7837701-7837967	Chr7:7766882-7767148	Chr7:7958072-7958338	Chr7:8249877-8250143	Chr7:8600970-8601236
ONG0700200	Chr7:8789266-8789419	Chr7:8549797-8549950	Chr7:8233340-8233693	Chr7:8815752-8815905	Chr7:8395529-8395682	Chr7:8646525-8646678	Chr7:9044671-9044824	Chr7:8703937-8704090	Chr7:8580012-8580165	Chr7:8364051-8364316	Chr7:8661634-8661787	Chr7:8316497-8316762	Chr7:8425582-8425847	Chr7:8333823-8334088	Chr7:9016814-9017079	Chr7:8200036-8200301	Chr7:8064417-8064570	Chr7:8255310-8255463	0	Chr7:8857925-8858190
ONG0700210	Chr7:8838878-8839214	Chr7:8599439-8599775	0	Chr7:8865944-8866282	Chr7:8445139-8445475	Chr7:8696153-8696489	Chr7:9094309-9094645	Chr7:8753589-8753925	Chr7:8629618-8629954	Chr7:8401120-8401455	Chr7:8711858-8712196	Chr7:8353559-8353894	Chr7:8476301-8476613	Chr7:8370879-8371214	Chr7:9053825-9054160	Chr7:8237109-8237444	Chr7:8124546-8124884	Chr7:8306413-8306751	Chr7:8586892-8587230,Chr7:9123187-9123525	Chr7:8908360-8908698
ONG0700220	Chr7:9391847-9391966	Chr7:9165404-9165523	Chr7:8786333-8786452	Chr7:9476451-9476570	Chr7:8999497-8999616	Chr7:9250889-9251008	Chr7:9646154-9646273	Chr7:9316780-9316899	Chr7:9184239-9184358	Chr7:8965439-8965558	Chr7:9286853-9286973	Chr7:8916939-8917058	Chr7:9097678-9097797	Chr7:8935207-8935326	Chr7:9612985-9613104	Chr7:8777139-8777258	0	0	0	0
ONG0700230	Chr7:9493103-9493156	Chr7:9266642-9266695	Chr7:8870664-8870717	Chr7:9561140-9561193	Chr7:9100756-9100809	Chr7:9352133-9352186	Chr7:9747394-9747447	Chr7:9411248-9411301	Chr7:9285458-9285512	Chr7:9049987-9050040	Chr7:9381535-9381588	Chr7:9001476-9001529	Chr7:9191755-9191808	Chr7:9019642-9019695	Chr7:9697416-9697469	Chr7:8861600-8861653	0	0	0	0
ONG0700240	Chr7:9566111-9566376	Chr7:9339636-9339901	Chr7:8939452-8939716	Chr7:9645935-9646199	Chr7:9173770-9174035	Chr7:9425141-9425406	Chr7:9820407-9820672	Chr7:9483927-9484192	Chr7:9358477-9358742	Chr7:9118862-9119126	Chr7:9437616-9437881	Chr7:9070359-9070623	Chr7:9260185-9260448	Chr7:9088527-9088791	Chr7:9766280-9766544	Chr7:8930460-8930724	Chr7:8861852-8862116	Chr7:9055764-9056028	Chr7:9459642-9459907	0
ONG0700250	0	0	Chr7:9995110-9995342	0	0	0	0	0	0	Chr7:9827032-9827264	0	Chr7:9777316-9777548	0	Chr7:9786684-9786916	0	Chr7:9622770-9623002	0	0	0	0
ONG0700260	Chr7:12307802-12307934	Chr7:12088992-12089124	Chr7:11747722-11747854	Chr7:12261804-12261936	Chr7:11901569-11901701	Chr7:12154087-12154219	Chr7:12548533-12548665	Chr7:12202507-12202639	Chr7:12091969-12092101	Chr7:11679924-11680056	Chr7:11352375-11352507	Chr7:11536912-11537044	Chr7:11797566-11797698	Chr7:11522648-11522779	Chr7:11905756-11905888	Chr7:11543905-11544037	Chr7:10797697-10797829	Chr7:11060594-11060726	Chr7:11649676-11649804	0
ONG0700270	Chr7:13298762-13301329	Chr7:13070659-13073226	Chr7:12529669-12529755	Chr7:13339994-13342549	Chr7:13322477-13325040	Chr7:13154292-13156859	Chr7:13525449-13528016	Chr7:13632332-13634895	Chr7:13047188-13049755	Chr7:12659598-12662164	Chr7:12326898-12329467	Chr7:12273000-12275651	Chr7:13183168-13185814	Chr7:12441418-12443988	Chr7:12715555-12718206	Chr7:12405743-12417878	Chr7:11492593-11495217	Chr7:11806927-11810366	Chr7:12580389-12582945	Chr7:14132015-14134650
ONG0700280	0	0	0	0	0	0	0	0	0	0	0	Chr7:12509935-12514019	0	Chr7:12658988-12663072	Chr7:12934255-12938340	0	0	0	0	0
ONG0700290	Chr7:13559852-13559973	Chr7:13331715-13331836	0	Chr7:13770790-13770911	Chr7:13583524-13583645	Chr7:13415324-13415445	Chr7:13786499-13786620	Chr7:13893380-13893501	Chr7:13308259-13308380	Chr7:12920417-12920538	0	Chr7:12609791-12609911	Chr7:13596630-13596751	Chr7:12762091-12762218	Chr7:13042931-13043051	0	0	0	Chr7:12914542-12914662	0
ONG0700300	Chr7:14301749-14302157	Chr7:14073496-14073904	Chr7:13688056-13688464	Chr7:14511084-14511492	Chr7:14321629-14322037	Chr7:14153453-14153861	Chr7:14524653-14525061	Chr7:14631556-14631964	Chr7:14046315-14046723	Chr7:13666871-13667279	Chr7:13284399-13284634	Chr7:13352329-13352737	Chr7:14361819-14362227	Chr7:13502512-13502920	Chr7:13776629-13777037	Chr7:13479446-13479854	Chr7:12400499-12400734	Chr7:13734506-13734741	Chr7:13587888-13588123	Chr7:14486748-14487156
ONG0700310	0	0	0	0	0	0	0	0	0	0	0	0	0	Chr7:14230357-14244746	0	0	0	0	0	0
ONG0700320	0	0	0	0	0	0	0	0	0	0	Chr11:21619904-21620695	Chr7:14009193-14009520	Chr7:15018884-15019211	Chr7:14368800-14369127	0	Chr7:14109972-14110299	0	0	Chr7:17587435-17587761	Chr7:18654903-18655229
ONG0700330	Chr7:14925378-14925494	Chr7:14697138-14697254	Chr7:14138907-14139023	Chr7:15039247-15039363	Chr7:15091492-15091608	Chr7:14918240-14918356	Chr7:15289431-15289547	Chr7:15396648-15396764	Chr7:14802188-14802304	Chr7:14284567-14284683	Chr7:13714039-13714155	Chr7:14234451-14234567	Chr7:15243925-15244041	Chr7:14576229-14576345	Chr7:14192892-14193008	Chr7:14397690-14397806	Chr7:12835199-12835315	Chr7:13296643-13296759	Chr7:14041382-14041498	0
ONG0700340	Chr7:15123120-15123307	Chr7:14894904-14895091	Chr7:14336797-14336984	Chr7:15244404-15244591	Chr7:15296782-15296969	Chr7:15123529-15123716	Chr7:15494713-15494900	Chr7:15601945-15602132	Chr7:15007525-15007712	Chr7:14485358-14485545	Chr7:13900857-13901044	Chr7:14426333-14426520	Chr7:15435688-15435875	Chr7:14767400-14767587	Chr7:14385916-14386103	Chr7:14589940-14590127	Chr7:13022632-13022819	Chr7:13109074-13109261	0	0
ONG0700350	0	0	0	0	0	0	0	0	0	0	0	Chr7:14797532-14797724	Chr7:15800361-15800553	Chr7:15132212-15132404	Chr7:14759505-14759697	Chr7:14947641-14947833	0	0	0	0
ONG0700360	0	Chr7:15857036-15857432	Chr7:15271061-15271461	Chr7:16137369-16137771	0	0	0	0	0	Chr7:15399934-15400329	Chr7:14826515-14826910	0	0	Chr7:15562158-15562554	0	0	0	0	0	0
ONG0700370	Chr7:16142837-16143072	Chr7:15903542-15903777	0	Chr7:16171910-16172145	Chr7:16279803-16280038	Chr7:16106266-16106501	Chr7:16477642-16477877	Chr7:16585016-16585251	Chr7:16033334-16033569	Chr7:15434742-15434977	Chr7:14861332-14861567	Chr7:15299527-15299762	Chr7:16304078-16304305	Chr7:15585571-15585798	Chr7:15263111-15263338	Chr7:15450453-15450680	Chr7:13900943-13901178	Chr7:14333809-14334044	Chr7:15188410-15188636	0
ONG0700380	Chr7:17214136-17214552	Chr7:16766507-16766923	0	Chr7:17124305-17124712	Chr7:17584364-17584748	Chr7:17427992-17428376	Chr7:17799226-17799610	Chr7:17896404-17896811	Chr7:16944694-16945110	Chr7:16409399-16409815	Chr7:15834525-15834941	Chr7:16190893-16191309	Chr7:17169352-17169768	Chr7:16449369-16449785	Chr7:16128247-16128663	Chr7:16315640-16316056	Chr7:14705986-14706345	Chr7:15143389-15143748	Chr7:16227103-16227519	Chr7:17446015-17446431
ONG0700390	0	Chr7:17045562-17045653	0	Chr7:17333140-17333231	Chr7:17854851-17854942	Chr7:17698425-17698516	Chr7:18069758-18069849	Chr7:18105560-18105651	Chr7:17223676-17223767	0	0	Chr7:16413602-16413693	Chr7:17391968-17392059	Chr7:16669211-16669302	Chr7:16351011-16351102	Chr7:16538397-16538488	Chr7:14900462-14900553	Chr7:15332646-15332737	Chr7:16428963-16429054	Chr7:17612595-17612686
ONG0700400	0	0	0	Chr7:17333752-17334268	0	0	0	Chr7:18106172-18106688	0	0	0	0	Chr7:17392580-17393096	Chr7:16669822-16670338	Chr7:16351623-16352139	Chr7:16539008-16539524	0	0	0	0
ONG0700410	Chr7:18313588-18313763	Chr7:17941001-17941177	Chr7:17399482-17399658	Chr7:18229635-18229811	Chr7:18750970-18751146	Chr7:18594200-18594376	Chr7:18965769-18965945	Chr7:19085261-19085437	Chr7:18118405-18118581	Chr7:17434341-17434514	Chr7:16866280-16866453	Chr7:17210022-17210195	Chr7:18185689-18185865	Chr7:17471422-17471595	Chr7:17166721-17166897	Chr7:17335606-17335779	Chr7:15681767-15681941	Chr7:16330045-16330219	Chr7:17370306-17370482	0
ONG0700420	0	Chr7:18008227-18008458	Chr7:17466714-17466945	Chr7:18296430-18296661	0	0	0	0	Chr7:18185633-18185864	Chr7:17501251-17501482	Chr7:16933294-16933525	Chr7:17277072-17277303	0	Chr7:17538434-17538665	0	Chr7:17402619-17402850	Chr7:15745594-15745825	Chr7:16393828-16394059	0	0
ONG0700430	0	Chr7:18108662-18109575	Chr7:17567151-17568064	Chr7:18396523-18397436	0	0	0	0	Chr7:18286071-18286984	Chr7:17601809-17602722	Chr7:17033826-17034739	Chr7:17377537-17378450	0	Chr7:17638820-17639733	0	Chr7:17509559-17510472	Chr7:15826059-15826975	Chr7:16467265-16468181	0	0
ONG0700440	Chr7:18598627-18598953	Chr7:18252518-18252844	Chr7:17710193-17710519	Chr7:18536837-18537163	Chr7:18969170-18969496,Chr8:5488329-5488648	Chr7:18812345-18812671	Chr7:19183956-19184282,Chr8:5396715-5397034	Chr7:19360696-19361022	Chr7:18426595-18426921	Chr7:17742510-17742836	Chr11:21619904-21620695,Chr7:17174332-17174658	Chr7:14009193-14009520,Chr7:17518193-17518519	Chr7:15018884-15019211,Chr7:18460720-18461046	Chr7:14368800-14369127,7:17779385-17779711	Chr7:17381779-17382105	Chr7:14109972-14110299,Chr7:17650136-17650462	Chr7:15947505-15947831	Chr7:16589593-16589919	Chr7:17587435-17587761	Chr7:18654903-18655229
ONG0700450	Chr7:19657720-19657932	Chr7:19311546-19311758	Chr7:18824676-18824888	Chr7:19633637-19633849	Chr7:19989941-19990153	Chr7:19832909-19833121	Chr7:20204494-20204706	Chr7:20432846-20433058	Chr7:19528766-19528978	Chr7:18784163-18784375	Chr7:18262176-18262388	Chr7:18555502-18555714	Chr7:19508095-19508307	Chr7:18892322-18892534	Chr7:18425371-18425583	Chr7:18686515-18686727	0	0	Chr7:18520027-18520220	0
ONG0700460	Chr7:19972552-19973108	Chr7:19612490-19613046	Chr7:19137847-19138405	Chr7:19946487-19947043	Chr7:20305125-20305681	Chr7:20147986-20148542	Chr7:20519675-20520231	Chr7:20730806-20731362	Chr7:19843620-19844176	Chr7:19121611-19122166	Chr7:18599424-18599979	Chr7:18852471-18853027	Chr7:19800320-19800876	Chr7:19206053-19206609	Chr7:18758617-18759173	Chr7:19031039-19031594	Chr7:17099471-17100027	Chr7:17755515-17756071	Chr7:18797675-18797788	0
ONG0700470	Chr7:20035989-20036106	Chr7:19675921-19676038	Chr7:19200808-19200925	Chr7:20009555-20009672	Chr7:20368570-20368687	Chr7:20211443-20211560	Chr7:20583126-20583243	Chr7:20794242-20794359	Chr7:19907052-19907169	Chr7:19190133-19190250	Chr7:18667955-18668072	Chr7:18916435-18916552	Chr7:19864285-19864402	Chr7:19282265-19282358	Chr7:18821919-18822036	Chr7:19099563-19099680	Chr7:17163603-17163720	Chr7:17819502-17819619	Chr7:18860714-18860831	Chr7:20368515-20368632	Chr7:22272767-22272859
ONG0700480	Chr7:20340490-20340687	Chr7:19988439-19988635	Chr7:19498027-19498223	Chr7:20304482-20304678	Chr7:20666736-20666932	Chr7:20509583-20509779	Chr7:20881301-20881497	Chr7:21093182-21093378	Chr7:20205964-20206160	Chr7:19494783-19494980	Chr7:18990378-18990574	Chr7:19231205-19231400	Chr7:20176474-20176671	Chr7:19596389-19596586	Chr7:19139610-19139807	Chr7:19396030-19396228	Chr7:17453865-17454019	Chr7:18110589-18110785	Chr7:19180146-19180343	Chr7:20697712-20697906	Chr7:22798294-22798493
ONG0700490	Chr7:21482704-21483029	Chr7:21112765-21113089	Chr7:20567012-20567337	Chr7:21364769-21365094	Chr7:21731623-21731947	Chr7:21574329-21574654	Chr7:21946179-21946504	Chr7:22129049-22129374	Chr7:21289607-21289932	Chr7:20487909-20488233	Chr7:19965770-19966094	Chr7:20295665-20295989	Chr7:21266037-21266361	Chr7:20761439-20761762	Chr7:20307608-20307931	Chr7:20405190-20405515	Chr7:18457129-18457453	Chr7:19126015-19126339	Chr7:20422691-20423016	0
ONG0700500	Chr7:22620062-22620151	0	0	0	0	0	0	0	0	0	0	Chr7:21316094-21316183	Chr7:22400656-22400745	Chr7:21759571-21759660	Chr7:21314212-21314301	Chr7:21441273-21441362	0	0	0	0
ONG0700510	Chr7:22702463-22702688	Chr7:22296438-22296662	Chr7:21692942-21693167	Chr7:22493202-22493427	Chr7:23088148-23088373	Chr7:22930573-22930798	Chr7:23302462-23302687	Chr7:23146519-23146744	Chr7:22358288-22358512	Chr7:21517844-21518069	Chr7:21356399-21356624	Chr7:21398343-21398568	Chr7:22482868-22483093	Chr7:21841206-21841431	Chr7:21396396-21396621	Chr7:21523628-21523853	Chr7:19485449-19485674	Chr7:20145141-20145366	Chr7:21807792-21808017	0
ONG0700520	Chr7:22737467-22737831	Chr7:22332847-22333211	Chr7:21742221-21742585	Chr7:22547873-22548237	Chr7:23125524-23125888	Chr7:22967949-22968313	Chr7:23339843-23340207	Chr7:23183864-23184228	Chr7:22394702-22395066	Chr7:21565819-21566183	Chr7:21396291-21396655	Chr7:21433444-21433808	Chr7:22517982-22518346	Chr7:21876201-21876565	Chr7:21431396-21431760	Chr7:21558636-21559000	0	0	0	0
ONG0700530	Chr7:22996926-22997118	Chr7:22600939-22601131	Chr7:22000797-22000989	Chr7:22796044-22796236	Chr7:23400467-23400659	Chr7:23242803-23242995	Chr7:23614781-23614973	Chr7:23441369-23441561	Chr7:22653384-22653576	Chr7:21852967-21853159	Chr7:21672696-21672888	Chr7:21694351-21694543	Chr7:22777307-22777499	Chr7:22135597-22135789	Chr7:21697509-21697701	Chr7:21818034-21818226	Chr7:19765457-19765649	Chr7:20417776-20417968	Chr7:22183933-22184125	Chr7:22989188-22989380
ONG0700540	Chr7:23036219-23036642	Chr7:22632220-22632648	Chr7:22030359-22030787	Chr7:22825420-22825847	Chr7:23430009-23430437	Chr7:23272348-23272776	Chr7:23644324-23644752	Chr7:23470906-23471334	Chr7:22692671-22693094	Chr7:21882601-21883027	Chr7:21702333-21702759	Chr7:21723901-21724327	Chr7:22816580-22817003	Chr7:22174895-22175318	Chr7:21736779-21737202	Chr7:21857298-21857721	Chr7:19791278-19791704	Chr7:20443653-20444079	Chr7:22246190-22246616	0
ONG0700550	Chr7:23253055-23254726	Chr7:22852103-22853981	Chr7:22248299-22250177	Chr7:23056523-23058455	Chr7:23649907-23651784	Chr7:23492219-23494098	Chr7:23864363-23866241	Chr7:23690696-23692574	Chr7:22909403-22911076	Chr7:22103192-22105088	Chr7:21951880-21953775	Chr7:21946233-21948190	Chr7:23049436-23051342	Chr7:22398126-22400062	Chr7:21970115-21972072	Chr7:22085778-22087454	0	0	0	0
ONG0700560	0	0	0	0	0	0	0	0	0	0	0	0	0	Chr7:22421158-22421241	0	0	0	0	0	0
ONG0700570	Chr7:23970817-23971330	0	0	0	0	0	0	0	Chr7:23626975-23627488	0	0	0	Chr7:23614825-23615338	Chr7:22997550-22998063	Chr7:22552676-22553189	Chr7:22794857-22795370	0	0	0	0
ONG0700580	Chr7:24303749-24303972	Chr7:23743640-23743863	Chr7:23153305-23153528	Chr7:23891825-23892048	Chr7:24544022-24544245	Chr7:24386225-24386448	Chr7:24723147-24723370	Chr7:24582543-24582766	Chr7:23959902-23960125	Chr7:22962355-22962579	Chr7:22811106-22811330	Chr7:22837913-22838136	Chr7:23960991-23961215	Chr7:23277371-23277595	Chr7:22803294-22803518	Chr7:23127476-23127699	Chr7:20791977-20792200	Chr7:21437607-21437830	Chr7:23323321-23323544	0
ONG0700590	Chr7:24448684-24448751	Chr7:23891036-23891103	Chr7:23300919-23300986	Chr7:24039610-24039677	Chr7:24691701-24691768	Chr7:24533886-24533953	Chr7:24870838-24870905	Chr7:24730223-24730290	Chr7:24104847-24104914	Chr7:23110005-23110070	Chr7:22958664-22958729	Chr7:22985955-22986022	Chr7:24101777-24101844	Chr7:23418572-23418639	Chr7:22944475-22944542	Chr7:23272391-23272458	Chr7:20927843-20927910	Chr7:21573767-21573834	Chr7:23513010-23513077	0
ONG0700600	0	0	0	0	0	0	0	0	0	0	0	0	Chr7:24136321-24136379	Chr7:23453106-23453164	Chr7:22979008-22979066	0	Chr7:20962517-20962575	0	Chr7:23550418-23550476	0
ONG0700610	Chr7:24899668-24899758	Chr7:24320473-24320563	Chr7:23718221-23718311	Chr7:24450732-24450822	Chr7:25104859-25104949	Chr7:24946797-24946887	Chr7:25254186-25254276	Chr7:25133091-25133181	Chr7:24555386-24555476	Chr7:23526040-23526130	Chr7:23374727-23374817	Chr7:23347294-23347384	Chr7:24519383-24519473	Chr7:23836308-23836398	Chr7:23366742-23366832	Chr7:23707529-23707619	Chr7:21325646-21325738	Chr7:21971988-21972078	Chr7:23923973-23924065	0
ONG0700620	Chr7:24924221-24924334	Chr7:24345018-24345131	Chr7:23742932-23743045	Chr7:24475140-24475253	Chr7:25129418-25129531	Chr7:24971358-24971471	Chr7:25299643-25299753	Chr7:25157590-25157703	Chr7:24579945-24580058	Chr7:23550653-23550766	Chr7:23399223-23399336	Chr7:23371890-23372003	Chr7:24544032-24544145	Chr7:23860726-23860839	Chr7:23391357-23391470	Chr7:23732118-23732231	Chr7:21351432-21351545	Chr7:21997590-21997701	Chr7:23963366-23963479	0
ONG0700630	Chr7:25822695-25823237	Chr7:25283903-25284445	Chr7:24686738-24687268	Chr7:25370977-25371520	Chr7:26027778-26028320	Chr7:25869616-25870158	Chr7:26230273-26230815	Chr7:26063826-26064368	Chr7:25516886-25517428	Chr7:24499211-24499741	Chr7:24294052-24294582	0	0	Chr7:24747863-24748393	0	Chr7:24603320-24603850	0	0	Chr7:24927388-24927932	0
ONG0700640	Chr7:25935842-25935933	Chr7:25397005-25397096	Chr7:24866099-24866190	Chr7:25484158-25484249	Chr7:26140928-26141019	Chr7:25982764-25982855	Chr7:26342624-26342715	Chr7:26177013-26177104	Chr7:25629051-25629142	Chr7:24603943-24604034	Chr7:24398872-24398963	Chr7:24446868-24446959	Chr7:25606952-25607043	Chr7:24918843-24918934	Chr7:24472299-24472390	Chr7:24777057-24777148	Chr7:22266127-22266218	Chr7:22903219-22903310	Chr7:25049573-25049664	0
ONG0700650	Chr7:26281659-26282006	Chr7:25675534-25675880	Chr7:25146220-25146566	Chr7:25802645-25802991	Chr7:26419642-26419988	Chr7:26261502-26261848	Chr7:26621308-26621654	Chr7:26455696-26456043	Chr7:25912132-25912478	Chr7:24952144-24952490	Chr7:24747050-24747396	Chr7:24774120-24774466	Chr7:25933165-25933511	Chr7:25285591-25285909	Chr7:24830814-24831160	Chr7:25143794-25144140	Chr7:22546006-22546352	Chr7:23183389-23183735	Chr7:25349205-25349541	0
ONG0700660	Chr7:27393866-27394171	Chr7:26795251-26795556	Chr7:26257077-26257382	Chr7:26914476-26914779	Chr7:27551041-27551346	Chr7:27375387-27375692	Chr7:27735033-27735338	Chr7:27573226-27573529	Chr7:27021582-27021887	Chr7:26075121-26075426	Chr7:25870489-25870794	Chr7:25882904-25883209	Chr7:27021590-27021895	Chr7:26373848-26374153	Chr7:25929269-25929574	Chr7:26228995-26229300	Chr7:23565247-23565552	Chr7:24209431-24209736	Chr7:26462820-26463125	0
ONG0700670	0	0	0	0	Chr7:29005935-29010569	0	0	0	0	Chr7:27679004-27683637	Chr7:27269956-27274604	Chr7:27434202-27438832	Chr7:28627272-28631904	Chr7:27975238-27979870	Chr7:27455835-27460467	0	0	0	0	0
ONG0700680	Chr7:29944541-29944642	Chr7:29475310-29475411	Chr7:28857325-28857426	Chr7:29428918-29429019	Chr7:30079435-30079536	Chr7:29855698-29855799	Chr7:30194274-30194375	Chr7:30035135-30035236	Chr7:29514263-29514364	Chr7:28685720-28685821	Chr7:28276765-28276866	Chr7:28455922-28456024	Chr7:29642662-29642764	Chr7:28940266-28940368	Chr7:28470988-28471089	Chr7:28599117-28599219	Chr7:25869385-25869487	Chr7:26581998-26582100	Chr7:28944804-28944906	0
ONG0800010	Chr8:44264-47428	Chr8:34793-43189	Chr8:24207-32604	Chr8:48904-52067	Chr8:37561-40725	Chr8:23873-34849	Chr8:46253-49416	Chr8:42618-45782	Chr8:50389-58794	Chr8:48429-51587	Chr8:34120-37276	Chr8:12182-15351	Chr8:13882-17051	Chr8:13121-16290	Chr8:4879-8049	Chr8:45408-53822	Chr8:6229-9371	Chr8:8451-11593	Chr8:22951-26121	0
ONG0800020	Chr8:109075-109470	Chr8:105172-105569	Chr8:94581-94978	Chr8:113844-114244	Chr8:102408-102803	Chr8:108679-109076	Chr8:111212-111610	Chr8:107479-107874	Chr8:132759-133155	Chr8:113265-113663	Chr8:99003-99403	Chr8:76383-76788	Chr8:78082-78487	Chr8:77312-77717	Chr8:69087-69492	Chr8:127778-128174	Chr8:70294-70693	Chr8:72504-72903	Chr8:86684-87084	0
ONG0800030	Chr8:577367-577600	Chr8:531163-531398	Chr8:483913-484148	Chr8:516937-517172	Chr8:557870-558105	Chr8:503725-503960	Chr8:488864-489099	Chr8:577726-577959	Chr8:522015-522250	Chr8:535182-535417	Chr8:521177-521412	Chr8:472995-473238	Chr8:481866-482109	Chr8:473721-473964	Chr8:465824-466067	Chr8:517287-517519	Chr8:474580-474824	Chr8:506114-506358	Chr8:610525-610776	0
ONG0800040	0	Chr8:662277-662494	Chr8:614849-615066	0	Chr8:697367-697584	Chr8:634570-634787	Chr8:632455-632672	Chr8:723059-723276	Chr8:661469-661686	Chr8:670588-670805	Chr8:651995-652212	Chr8:598559-598757	Chr8:608055-608253	Chr8:599689-599887	Chr8:591935-592133	0	Chr8:606780-606997	Chr8:641283-641500	0	Chr8:786477-786694
ONG0800050	Chr8:719609-719824	0	0	Chr8:665588-665814	0	0	0	0	0	Chr8:685920-686142	0	Chr8:625544-625766	Chr8:634956-635178	Chr8:626591-626813	Chr8:618893-619115	Chr8:667449-667675	0	0	Chr8:747477-747690	Chr8:811928-812150
ONG0800060	Chr8:1047606-1047767	Chr8:958324-958484	Chr8:924452-924612	Chr8:990245-990405	Chr8:989336-989496	Chr8:929960-930120	Chr8:862780-862940	Chr8:1014865-1015025	Chr8:959765-959928	Chr8:977741-977902	Chr8:937706-937867	Chr8:909552-909712	Chr8:920384-920544	Chr8:906159-906319	Chr8:903217-903373	Chr8:987446-987606	0	0	0	0
ONG0800070	Chr8:1112860-1112913	Chr8:1023578-1023631	Chr8:989705-989758	0	Chr8:1054581-1054634	Chr8:995210-995263	Chr8:928034-928087	Chr8:1080115-1080169	Chr8:1025045-1025098	Chr8:1042982-1043035	Chr8:1002957-1003010	Chr8:974789-974842	Chr8:985639-985692	Chr8:971398-971451	Chr8:968452-968505	Chr8:1052696-1052749	Chr8:965098-965151	Chr8:997823-997876	0	0
ONG0800080	Chr8:1856575-1857161	Chr8:1832347-1832933	Chr8:1930379-1930965	Chr8:1869468-1870047	Chr8:1935941-1936510	Chr8:1899922-1900509	Chr8:1832059-1832646	Chr8:1984849-1985418	0	Chr8:1743608-1744194	0	Chr8:2007312-2007898	Chr8:2006721-2007307	Chr8:1952439-1953025	Chr8:1927937-1928523	Chr8:1873556-1874142	Chr8:1602871-1603457	Chr8:1629085-1629671	Chr8:1726320-1726906	Chr8:2079907-2080446
ONG0800090	Chr8:2102294-2102391	Chr8:2078679-2078776	0	0	0	0	0	0	0	Chr8:1993672-1993769	Chr8:2007465-2007562	Chr8:2295552-2295649	Chr8:2295075-2295172	Chr8:2229304-2229401	Chr8:2216207-2216304	Chr8:2161895-2161992	Chr8:1851305-1851402	Chr8:1877547-1877644	Chr8:2029567-2030355	0
ONG0800100	Chr8:2252094-2252258	Chr8:2239852-2240016	Chr8:2335345-2335509	Chr8:2295722-2295886	Chr8:2368141-2368305	Chr8:2332146-2332310	Chr8:2264287-2264451	Chr8:2417022-2417186	Chr8:2133211-2133375	Chr8:2124395-2124559	Chr8:2161608-2161772	Chr8:2442309-2442473	Chr8:2441945-2442109	Chr8:2376010-2376174	Chr8:2363097-2363261	Chr8:2308762-2308926	Chr8:2001158-2001322	Chr8:2036332-2036496	Chr8:2171180-2171344	0
ONG0800110	Chr8:2383447-2383504	Chr8:2378088-2378144	0	0	0	0	0	0	Chr8:2280617-2280673	Chr8:2263360-2263416	Chr8:2300222-2300278	0	0	Chr8:2514675-2514731	Chr8:2502093-2502149	0	0	0	0	Chr8:2711752-2711808
ONG0800120	Chr8:2437088-2437252	Chr8:2441764-2441928	Chr8:2665515-2665679	Chr8:2624374-2624538	Chr8:2698323-2698487	Chr8:2662172-2662336	Chr8:2594344-2594508	Chr8:2747125-2747289	Chr8:2357156-2357320	Chr8:2321972-2322136	Chr8:2358806-2358970	Chr8:2762397-2762561	Chr8:2755551-2755715	Chr8:2691427-2691591	Chr8:2676733-2676897	Chr8:2622409-2622573	0	0	Chr8:2370462-2370558	Chr8:2826012-2826178
ONG0800130	VXJH01000023.1:149884-150122	0	Chr8:2965720-2965958	Chr8:2924474-2924712	0	Chr8:2962659-2962897	Chr8:2895049-2895287	Chr8:3047696-3047934	Chr8:2558660-2558900	0	0	Chr8:3043475-3043713	Chr8:3021428-3021666	Chr8:2915815-2916053	Chr8:2985055-2985293	Chr8:2921050-2921288	Chr8:2329825-2330070	Chr8:2371385-2371630	0	0
ONG0800140	Chr8:3353350-3354266	Chr8:3382655-3383568	Chr8:3671376-3672289	Chr8:3628284-3629197	Chr8:3668106-3669019	Chr8:3650318-3651245	Chr8:3570870-3571797	Chr8:3733814-3734727	Chr8:3289576-3290489	Chr8:3208395-3209309	Chr8:3244218-3245132	Chr8:3745331-3746257	Chr8:3740376-3741289	Chr8:3585973-3586901	Chr8:3682889-3683816	Chr8:3659420-3660340	Chr8:3011781-3012703	Chr8:3056211-3057128	Chr8:3284435-3285356	0
ONG0800150	0	0	0	0	0	Chr8:3857425-3858015	Chr8:3777960-3778550	0	0	0	0	Chr8:3952437-3953027	0	Chr8:3784325-3784914	Chr8:3890134-3890724	0	Chr8:3197715-3198306	Chr8:3242002-3242593	Chr8:3498263-3514059	0
ONG0800160	Chr8:3717826-3718127	Chr8:3743842-3744143	Chr8:4052959-4053260	Chr8:3988235-3988536	Chr8:3996859-3997160	Chr8:4019534-4019835	Chr8:3940044-3940345	Chr8:4142054-4142355	Chr8:3671433-3671734	Chr8:3568341-3568642	Chr8:3620415-3620716	Chr8:4120997-4121298	Chr8:4100045-4100342	Chr8:3977637-3977938	Chr8:4052186-4052487	Chr8:4037621-4037922	0	Chr8:3368395-3368692	0	Chr8:4019562-4019859
ONG0800170	0	0	0	0	Chr8:4058289-4058446	Chr8:4080965-4081122	Chr8:4001474-4001631	0	0	0	0	Chr8:4182421-4182578	0	Chr8:4051169-4051326	Chr8:4113552-4113709	0	Chr8:3373564-3373718	Chr8:3418299-3418454	0	0
ONG0800180	0	0	Chr8:4915864-4915957,Chr8:5097007-5097100,Chr8:5118877-5118970	0	Chr8:4872043-4872141	0	Chr8:4780437-4780535	0	0	0	0	Chr8:5019958-5020051	0	Chr8:4893045-4893138	Chr8:4969391-4969484	0	Chr8:4025878-4025976	Chr8:4070412-4070510	0	0
ONG0800190	0	Chr8:5576205-5576627	Chr8:6039028-6039450	0	Chr8:5753759-5754181	Chr8:5884109-5884531	Chr8:5662144-5662566	Chr8:5894714-5895136	0	Chr8:5396045-5396467	Chr8:5328316-5328738	Chr8:5944332-5944754	0	Chr8:5818201-5818623	Chr8:5807335-5807757	Chr8:5818939-5819361	0	0	Chr8:5363882-5364304	0
ONG0800200	Chr8:5456103-5456555	Chr8:5590583-5591040	Chr8:6053411-6053868	Chr8:5781418-5781870	Chr8:5767941-5768393	Chr8:5898460-5898917	Chr8:5676326-5676778	Chr8:5909093-5909550	Chr8:5575804-5576256	Chr8:5410429-5410886	Chr8:5342490-5342942	Chr8:5971158-5971610	Chr8:5824706-5825158	Chr8:5845028-5845480	Chr8:5834166-5834618	Chr8:5840680-5841137	Chr8:4926765-4927217	Chr8:4994363-4994815	Chr8:5378217-5378669	Chr8:5793469-5793922
ONG0800210	Chr8:5871807-5872104	Chr8:5971434-5971731	Chr8:6731349-6731646	Chr8:6368739-6369036	Chr8:6178546-6178843	Chr8:6497579-6497876	Chr8:6065175-6065472	Chr8:6301292-6301589	Chr8:6167662-6167959	Chr8:5975379-5975676	Chr8:6207284-6207581	Chr8:6346667-6346964	Chr8:6240506-6240803	Chr8:6194762-6195059	Chr8:6181380-6181677	Chr8:6313943-6314240	Chr8:5494967-5495265	0	Chr8:5882951-5883248	Chr8:6206159-6206455
ONG0800220	Chr8:7220978-7221142	Chr8:7266791-7266955	0	0	Chr8:8313493-8313657	0	Chr8:8183387-8183551	0	0	0	0	Chr8:7620762-7620926	Chr8:7819154-7819318	Chr8:7749085-7749249	0	0	0	0	0	Chr8:7580623-7580787
ONG0800230	Chr8:7231991-7232140	Chr8:7277804-7277953	Chr8:8946925-8947096	Chr8:7756731-7756902	Chr8:8324720-8324869	Chr8:7959001-7959161	Chr8:8194614-8194763	Chr8:7811510-7811681	Chr8:7562244-7562415	Chr8:8111941-8112112	Chr8:8225723-8225894	Chr8:7631975-7632124	Chr8:7830367-7830516	Chr8:7760298-7760447	Chr8:7743923-7744072	Chr8:8439451-8439622	Chr8:6308903-6309052	Chr8:6330922-6331071	0	Chr8:7591404-7591553
ONG0800240	Chr8:7289865-7289943	Chr8:7335683-7335761	0	0	Chr8:8377323-8377483	Chr8:8011923-8012001	Chr8:8247217-8247377	0	Chr8:7615178-7615256	Chr8:8169136-8169214	0	Chr8:7691382-7691460	Chr8:7889769-7889847	Chr8:7819695-7819773	Chr8:7799035-7799113	Chr8:8500331-8500491	Chr8:6359811-6359971	Chr8:6381897-6382057	0	0
ONG0800250	Chr8:8360664-8360765	0	0	0	Chr8:9495099-9495189	Chr8:9103308-9103409	Chr8:9364988-9365078	Chr8:8997656-8997757	0	0	0	0	Chr8:9067465-9067566	Chr8:9061090-9061191	Chr8:8910705-8910806	Chr8:9525934-9526035	0	0	0	0
ONG0800260	0	0	0	0	0	0	0	0	0	0	0	0	0	Chr8:9242935-9284593	0	0	0	0	0	0
ONG0800270	Chr8:8615564-8615655	Chr8:8751306-8751397	Chr8:10474971-10475062	Chr8:9226855-9226946	Chr8:9782501-9782591	0	Chr8:9652398-9652488	Chr8:9256766-9256857	Chr8:9051618-9051709	Chr8:9707150-9707241	Chr8:9698313-9698404	Chr8:9147595-9147686	0	Chr8:9372604-9372694	0	0	Chr8:7583377-7583468	Chr8:7628635-7628726	Chr8:8245451-8245541	Chr8:9337875-9337966
ONG0800280	Chr8:8932162-8932459	Chr8:9105640-9105940	Chr8:10800526-10800826	Chr8:9580500-9580800	Chr8:10023235-10023532	Chr8:9708328-9708627	Chr8:9893131-9893428	Chr8:9577738-9578038	Chr8:9405962-9406262	Chr8:9952225-9952525	Chr8:9948377-9948674	Chr8:9480977-9481277	Chr8:9631650-9631949	Chr8:9638540-9638837	Chr8:9432803-9433100	Chr8:10099208-10099507	Chr8:7800242-7800542	Chr8:7845241-7845541	Chr8:8556730-8557026	Chr8:9609433-9609733
ONG0800290	Chr8:8983920-8984037	Chr8:9157382-9157500	Chr8:10852617-10852734	Chr8:9632122-9632240	0	0	0	Chr8:9631680-9631797	Chr8:9457708-9457826	0	0	0	0	Chr8:9690806-9690923	Chr8:9484041-9484158	0	0	0	0	0
ONG0800300	Chr8:9631344-9631415	Chr8:9846634-9846705	Chr8:11544132-11544203	Chr8:10319335-10319406	Chr8:10712126-10712197	Chr8:10311538-10311609	Chr8:10582052-10582123	Chr8:10323258-10323329	Chr8:10146902-10146973	Chr8:10510797-10510868	Chr8:10682041-10682112	Chr8:10083263-10083334	Chr8:10234057-10234125	Chr8:10372713-10372784	Chr8:10113395-10113466	Chr8:10707034-10707105	Chr8:8462984-8463055	Chr8:8509667-8509738	0	0
ONG0800310	Chr8:10153752-10153934	Chr8:10319428-10319610	Chr8:12021299-12021481	Chr8:10849293-10849475	Chr8:11190043-11190225	Chr8:10789394-10789576	Chr8:11059793-11059975	Chr8:10801226-10801408	Chr8:10669052-10669234	Chr8:10995116-10995298	Chr8:11211411-11211593	Chr8:10618883-10619065	Chr8:10817374-10817556	Chr8:10797385-10797567	Chr8:10649077-10649259	Chr8:11248951-11249133	Chr8:8909512-8909694	Chr8:8956216-8956398	Chr8:9583008-9583190	Chr8:10606157-10606337	Chr8:9844171-9844353
ONG0800320	Chr8:10206510-10206628	Chr8:10353871-10353989	Chr8:12055738-12055856	Chr8:10880497-10880615	Chr8:11224481-11224599	Chr8:10823834-10823952	Chr8:11094232-11094350	Chr8:10835666-10835784	Chr8:10721783-10721901	Chr8:11029553-11029671	Chr8:11241874-11241992	0	Chr8:10870379-10870497	Chr8:10829052-10829170	0	0	Chr8:8951882-8952000	Chr8:8998585-8998703	Chr8:9631795-9632137	0
ONG0800330	Chr8:10423581-10424132	Chr8:10532999-10533550	Chr8:12234827-12235378	Chr8:11079510-11080062	Chr8:11403589-11404141	Chr8:11002933-11003484	Chr8:11273348-11273899	Chr8:11014752-11015303	Chr8:10938813-10939364	Chr8:11208720-11209271	Chr8:11439485-11440036	Chr8:10989577-10990128	Chr8:11373914-11374465	Chr8:11022286-11022838	Chr8:11032566-11033117	Chr8:11630689-11631240	Chr8:9159688-9160239	Chr8:9206731-9207282	Chr8:9926223-9926774	0
ONG0800340	Chr8:10754843-10755219	Chr8:10848935-10849311	Chr8:12550862-12551238	Chr8:11412906-11413282	Chr8:11719527-11719903	Chr8:11318847-11319223	Chr8:11580616-11580992	Chr8:11330671-11331047	Chr8:11222100-11222476	Chr8:11530723-11531099	Chr8:11772988-11773364	Chr8:11365190-11365566	Chr8:11683518-11683894	Chr8:11414909-11415285	Chr8:11408251-11408627	Chr8:11999780-12000156	Chr8:9450200-9450580	Chr8:9497258-9497638	Chr8:10183063-10183434	Chr8:11041573-11041953
ONG0800350	Chr8:10930173-10930343	Chr8:10957179-10957349	Chr8:12658935-12659105	Chr8:11542973-11543143	Chr8:11827664-11827834	Chr8:11426948-11427118	Chr8:11688636-11688806	Chr8:11438825-11438995	Chr8:11330186-11330356	Chr8:11638898-11639068	Chr8:11902849-11903019	Chr8:11530090-11530260	Chr8:11848341-11848511	Chr8:11520559-11520729	Chr8:11579556-11579726	Chr8:12171436-12171606	Chr8:9570092-9570262	Chr8:9617160-9617330	Chr8:10292540-10292710	0
ONG0800360	Chr8:11000703-11000919	Chr8:11011097-11011285	Chr8:12712850-12713038	Chr8:11596398-11596587	Chr8:11881591-11881779	Chr8:11480881-11481069	Chr8:11742547-11742735	Chr8:11492752-11492940	Chr8:11384107-11384295	Chr8:11699294-11699482	Chr8:11956275-11956464	Chr8:11634042-11634257	Chr8:11902550-11902754	Chr8:11587256-11587472	Chr8:11683400-11683615	Chr8:12259501-12259716	Chr8:9628236-9628295	Chr8:9675275-9675334	Chr8:10348652-10348868	0
ONG0800370	0	0	0	0	0	0	0	0	0	0	0	0	0	Chr8:11921714-11921766	0	0	0	0	Chr8:10740289-10740343	0
ONG0800380	Chr8:11418945-11419013	Chr8:11503262-11503330	Chr8:13214130-13214198	Chr8:12059656-12059724	Chr8:12373823-12373891	Chr8:11972955-11973023	Chr8:12212637-12212705	Chr8:11984987-11985055	Chr8:11873017-11873085	Chr8:12191419-12191487	Chr8:12418976-12419044	Chr8:12653376-12653444	Chr8:12341486-12341554	Chr8:11976690-11976758	Chr8:12706746-12706814	Chr8:13278539-13278607	Chr8:9972315-9972383	Chr8:10019429-10019497	Chr8:10916689-10916757	Chr8:11878173-11878317	Chr8:11513155-11513791
ONG0800390	Chr8:11633858-11634058	0	0	Chr8:12456164-12456365	0	0	0	0	0	0	Chr8:12815065-12815266	Chr8:12573385-12573586	0	Chr8:12044299-12044500	Chr8:12626790-12626991	Chr8:13198510-13198711	Chr8:10025730-10027471	Chr8:10072836-10074577	Chr8:11001445-11001637	Chr8:11922101-11922300
ONG0800400	Chr8:11887840-11888290	Chr8:11762526-11762984	Chr8:13485103-13485559	Chr8:12249543-12250001	Chr8:12658909-12659367	Chr8:12257945-12258403	Chr8:12471906-12472364	Chr8:12273442-12273900	Chr8:12163031-12163489	Chr8:12450676-12451134	Chr8:12610221-12610679	Chr8:12374538-12375093	0	Chr8:12271894-12272345	Chr8:12423599-12424154	Chr8:12999638-13000193	Chr8:10187288-10187720	Chr8:10224615-10225048	0	0
ONG0800410	Chr8:12394700-12395428	0	0	0	0	0	0	0	0	0	0	Chr8:12159331-12160059	Chr8:13347550-13348278	Chr8:12797752-12798480	Chr8:12208326-12209054	Chr8:12784180-12784908	Chr8:10546071-10546796	Chr8:10582978-10583703	Chr8:11719244-11722911	0
ONG0800420	0	Chr8:12513014-12513065	Chr8:14371864-14371915	Chr8:12928585-12928636	Chr8:13565482-13565533	Chr8:13164206-13164257	Chr8:13387150-13387201	Chr8:13180147-13180198	Chr8:13069497-13069548	Chr8:13290422-13290473	Chr8:13288105-13288156	0	Chr8:13542657-13542708	Chr8:12915226-12915277	0	0	0	0	0	0
ONG0800430	Chr8:12930243-12930605	Chr8:12937824-12938186	Chr8:14796049-14796411	Chr8:13423192-13423554	Chr8:13984072-13984434	Chr8:13582624-13582986	Chr8:13822689-13823051	Chr8:13608348-13608710	Chr8:13497928-13498290	Chr8:13693708-13694070	Chr8:13760224-13760586	Chr8:12964218-12964580	Chr8:13978923-13979285	Chr8:13363677-13364039	Chr8:13144540-13144902	Chr8:13719456-13719818	Chr8:11100550-11100912	Chr8:11008027-11008389	Chr8:12403269-12403631	0
ONG0800440	Chr8:14189870-14189936	Chr8:14769738-14769804	Chr8:16664894-16664960	Chr8:14973179-14973245	Chr8:15849459-15849525	Chr8:15442323-15442389	Chr8:15677040-15677106	Chr8:15470075-15470141	Chr8:15358824-15358890	Chr8:15517620-15517686	Chr8:15307008-15307074	Chr8:14467847-14467913	Chr8:15462776-15462974	Chr8:14736240-14736306	Chr8:14656110-14656176	Chr8:15191888-15191954	Chr8:12462952-12463018	Chr8:12256823-12256889	Chr8:13720147-13720213	Chr8:15981083-15981155
ONG0800450	Chr8:14239493-14239701	Chr8:14813832-14814040	Chr8:16708992-16709200	Chr8:15019378-15019586	Chr8:15893560-15893768	Chr8:15486416-15486624	Chr8:15721163-15721371	Chr8:15514177-15514385	Chr8:15402912-15403120	Chr8:15561714-15561922	Chr8:15353194-15353402	Chr8:14517472-14517680	Chr8:15513597-15513805	Chr8:14801262-14801470	Chr8:14705722-14705930	Chr8:15241502-15241710	Chr8:12514297-12514505	Chr8:12308077-12308285	Chr8:13777937-13778145	Chr8:15941106-15941311
ONG0800460	Chr8:14496455-14496672	Chr8:15060108-15060325	Chr8:16951995-16952212	Chr8:15251269-15251486	Chr8:16139974-16140191	Chr8:15732760-15732977	Chr8:15967458-15967675	Chr8:15760156-15760373	Chr8:15648856-15649073	Chr8:15808049-15808266	Chr8:15583530-15583747	Chr8:14757208-14757425	Chr8:15804382-15804599	Chr8:15116142-15116359	Chr8:14945183-14945402	Chr8:15470409-15470626	Chr8:12738371-12738588	Chr8:12519672-12519889	Chr8:14015854-14016071	Chr8:15613096-15613313
ONG0800470	Chr8:14632335-14632426	Chr8:15210691-15210782	Chr8:17102599-17102690	Chr8:15391499-15391590	Chr8:16290574-16290665	Chr8:15883326-15883417	Chr8:16118112-16118203	Chr8:15911009-15911100	Chr8:15799507-15799598	Chr8:15958754-15958845	Chr8:15724022-15724113	Chr8:14906671-14906762	Chr8:15956991-15957082	Chr8:15260556-15260647	Chr8:15094713-15094804	Chr8:15648060-15648151	0	0	0	0
ONG0800480	Chr8:14641356-14641544	Chr8:15219710-15219898	Chr8:17111617-17111805	Chr8:15400517-15400705	Chr8:16299592-16299780	Chr8:15892341-15892529	Chr8:16127130-16127318	Chr8:15920026-15920214	Chr8:15808523-15808711	Chr8:15967771-15967959	Chr8:15733043-15733231	Chr8:14915694-14915882	Chr8:15966019-15966207	Chr8:15269580-15269768	Chr8:15103739-15103927	Chr8:15657054-15657242	0	0	Chr8:14175456-14175644	0
ONG0800490	Chr8:16554786-16555453	Chr8:16458602-16459270	Chr8:18304955-18305621	Chr8:17397707-17398373	Chr8:17492429-17493096	Chr8:17084905-17085572	Chr8:17328459-17329127	Chr8:17807063-17807730	Chr8:17015615-17016287	Chr8:17244365-17245030	Chr8:17714075-17714740	Chr8:16836787-16837452	Chr8:17273142-17273809	Chr8:16528473-16529138	Chr8:16010879-16011546	Chr8:17197739-17198408	Chr8:13962326-13962999	Chr8:13808237-13808905	Chr8:15535641-15536309	Chr8:14250899-14251566
ONG0800500	Chr8:17545538-17545804	Chr8:17526178-17526444	Chr8:19172159-19172425	Chr8:18066309-18066559	Chr8:18733949-18734215	Chr8:18325805-18326071	Chr8:18517659-18517925	Chr8:18701625-18701891	Chr8:18108336-18108602	Chr8:18182877-18187839	Chr8:18388327-18388593	Chr8:17777452-17777716	Chr8:18221005-18221271	Chr8:17179952-17180216	Chr8:16947728-16947992	Chr8:18240332-18240596	Chr8:14819771-14820037	Chr8:14781833-14782099	Chr8:16527653-16527919	Chr8:17109683-17109896
ONG0800510	Chr8:17579076-17579379	Chr8:17555417-17555581	Chr8:19212618-19212782,Chr12:6222563-6222869	Chr8:18099585-18099888	Chr8:18767489-18767792	Chr8:18359351-18359654	Chr8:18551199-18551502	Chr8:18730930-18731233	Chr8:18153402-18153705	Chr8:18212156-18212459	Chr8:18417346-18417649	Chr8:17810989-17811292	Chr8:18250300-18250464	Chr8:17213459-17213762,12:6964339-6964455	Chr8:16981268-16981571,Chr12:6363380-6363496	Chr8:18273869-18274172,Chr2:23334931-23335231	0	0	0	0
ONG0800520	0	Chr8:17997395-17997685	0	0	0	0	0	0	0	Chr8:18550262-18550552	0	Chr8:18117647-18118131	0	Chr8:17479593-17479883	Chr8:17288348-17288832	Chr8:18554310-18554600	Chr8:15171449-15171739	Chr8:15128077-15128367	0	0
ONG0800530	Chr8:18301844-18302311	Chr8:18275026-18275493	Chr8:20020349-20020841	Chr8:18820124-18820591	Chr8:19489460-19489927	Chr8:19081598-19082065	Chr8:19273560-19274027	Chr8:19307793-19308285	Chr8:18779291-18779758	Chr8:18755751-18756247	Chr8:19143350-19143846	Chr8:18374546-18375017	Chr8:18808276-18808768	Chr8:17685528-17686020	Chr8:17571387-17571879	Chr8:18760663-18761155	Chr8:15407242-15407689	Chr8:15355920-15356380	Chr8:17338570-17339041	Chr8:17684368-17684837
ONG0800540	Chr8:19667628-19667786	Chr8:19621449-19621598	Chr8:21247471-21247619	Chr8:20111717-20111865	Chr8:20774047-20774195	Chr8:20365776-20365924	Chr8:20556639-20556787	Chr8:20610829-20610987	Chr8:20076497-20076645	Chr8:20145483-20145641	Chr8:20513058-20513207	Chr8:19649286-19649435	Chr8:20119691-20119849	Chr8:19020387-19020545	Chr8:19008881-19009030	Chr8:19933239-19933395	Chr8:16637526-16637684	Chr8:16578344-16578502	Chr8:18804721-18804878	Chr8:19207541-19207697
ONG0800550	Chr8:19721371-19721729	Chr8:19681842-19682208	Chr8:21307845-21308211	Chr8:20172105-20172471	Chr8:20834445-20834811	Chr8:20426150-20426516	Chr8:20617030-20617396	Chr8:20672222-20672588	Chr8:20136884-20137250	Chr8:20205242-20205608	Chr8:20572639-20573005	Chr8:19709682-19710048	Chr8:20181037-20181403	Chr8:19081705-19082071	Chr8:19069273-19069639	Chr8:19993817-19994183	Chr8:16697228-16697594	Chr8:16637999-16638365	Chr8:18865547-18865913	0
ONG0800560	Chr8:19825219-19826968	Chr8:19785747-19787496	Chr8:21411185-21412924	Chr8:20276751-20278498	Chr8:20939570-20941319	Chr8:20531299-20533048	Chr8:20721734-20723483	Chr8:20777965-20779714	Chr8:20242019-20243768	Chr8:20308329-20311245	Chr8:20675631-20678529	Chr8:19813551-19815300	Chr8:20294634-20296297	Chr8:19195303-19196966	Chr8:19173133-19174882	Chr8:20094014-20096930	Chr8:16812290-16814039	Chr8:16753047-16754796	Chr8:18966729-18967015	Chr8:19392579-19394329
ONG0800570	Chr8:21089441-21089559	Chr8:21010948-21011066	Chr8:22573709-22573827	Chr8:21478346-21478464	Chr8:22154176-22154369	Chr8:21726756-21726874	Chr8:21865564-21865682	Chr8:21955014-21955132	Chr8:21418015-21418133	Chr8:21434011-21434203	Chr8:21798478-21798670	Chr8:21058297-21058490	Chr8:21565240-21565358	Chr8:20358646-20358839	Chr8:20418770-20418963	Chr8:21239747-21239940	Chr8:17876500-17876693	Chr8:17819536-17819729	Chr8:20116863-20116981	0
ONG0800580	Chr8:21600166-21600233	Chr8:21519261-21519328	Chr8:23083496-23083563	Chr8:22007845-22007912	Chr8:22679233-22679300	Chr8:22249794-22249861	Chr8:22388712-22388779	Chr8:22478105-22478172	Chr8:21937603-21937670	Chr8:21945690-21945757	Chr8:22304721-22304788	Chr8:21588450-21588517	Chr8:22083295-22083362	Chr8:20878300-20878367	Chr8:20977820-20977887	Chr8:21760778-21760845	Chr8:18380296-18380363	Chr8:18323314-18323381	0	0
ONG0800590	Chr8:21719236-21719485	Chr8:21633191-21633441	Chr8:23197003-23197252	Chr8:22121430-22121681	Chr8:22793412-22793661	Chr8:22372475-22372724	Chr8:22511419-22511669	Chr8:22600765-22601015	Chr8:22050042-22050291	Chr8:22058314-22058563	Chr8:22421826-22422076	Chr8:21708291-21708541	Chr8:22195100-22195345	Chr8:21015720-21015965	Chr8:21115413-21115658	Chr8:21873289-21873538	Chr8:18491288-18491537	Chr8:18432741-18432990	Chr8:20879296-20879545	0
ONG0800600	Chr8:21975127-21975231	Chr8:21889095-21889199	Chr8:23452375-23452479	Chr8:22443842-22443946	Chr8:23049114-23049218	Chr8:22628182-22628286	Chr8:22767335-22767439	Chr8:22856497-22856601	Chr8:22350248-22350352	Chr8:22298930-22299034	Chr8:22702966-22703070	Chr8:22017221-22017325	Chr8:22450136-22450240	Chr8:21269891-21269995	Chr8:21370392-21370496	Chr8:22164591-22164695	Chr8:18732570-18732673	Chr8:18673695-18673798	Chr8:21145436-21145540	Chr8:21622089-21622190
ONG0800610	Chr8:22215551-22215656	Chr8:22129489-22129594	Chr8:23692703-23692808	Chr8:22684082-22684187	Chr8:23289481-23289586	Chr8:22868562-22868667	Chr8:23007663-23007768	Chr8:23096840-23096945	Chr8:22590574-22590679	Chr8:22521354-22521459	Chr8:22935579-22935684	Chr8:22247777-22247882	Chr8:22674158-22674263	Chr8:21506949-21507054	Chr8:21601040-21601145	Chr8:22401531-22401636	0	0	0	0
ONG0800620	Chr8:22975068-22975170	Chr8:22879251-22879353	Chr8:24442390-24442492	Chr8:23431580-23431682	Chr8:24039045-24039147	Chr8:23618022-23618124	Chr8:23757311-23757413	Chr8:23846664-23846766	Chr8:23339916-23340018	0	Chr8:23684175-23684277	Chr8:22863698-22863800	Chr8:23300393-23300495	Chr8:22172114-22172216	Chr8:22230568-22230670	0	0	Chr8:19516461-19516563	Chr8:22164937-22165039	0
ONG0800630	0	0	0	0	0	0	0	0	0	0	0	Chr8:24332883-24333442	Chr8:24764079-24764638	Chr8:23642311-23642870	Chr8:23693979-23694538	0	0	0	0	0
ONG0800640	Chr8:25116934-25117070	Chr8:25017391-25017527	Chr8:26591726-26591862	Chr8:25572452-25572588	Chr8:26164901-26165037	Chr8:25743453-25743589	Chr8:25890850-25890991	Chr8:25995963-25996099	Chr8:25493927-25494063	Chr8:25360975-25361116	Chr8:25829100-25829236	Chr8:24996807-24996943	Chr8:25421141-25421277	Chr8:24299203-24299339	Chr8:24357444-24357580	Chr8:25286256-25286392	Chr8:21466881-21467022	Chr8:21473767-21473908	0	0
ONG0800650	Chr8:26171657-26171976	Chr8:26080702-26081021	Chr8:27637106-27637425	Chr8:26631395-26631714	Chr8:27234557-27234876	Chr8:26793771-26794090	Chr8:26923539-26923858	Chr8:27045034-27045352	Chr8:26547474-26547793	Chr8:26428526-26428845	Chr8:26887140-26887459	Chr8:26096048-26096367	Chr8:26504854-26505173	Chr8:25347479-25347798	Chr8:25441921-25442240	Chr8:26332257-26332576	Chr8:22459453-22459768	Chr8:22464822-22465137	Chr8:25534209-25534527	0
ONG0800660	Chr8:26237179-26237338	Chr8:26146243-26146402	Chr8:27702513-27702672	0	Chr8:27300097-27300254	Chr8:26859309-26859466	Chr8:26989065-26989224	Chr8:27110564-27110721	Chr8:26613016-26613173	Chr8:26503084-26503243	Chr8:26952966-26953125	Chr8:26161753-26161910	Chr8:26570395-26570552	Chr8:25413018-25413175	Chr8:25507462-25507619	Chr8:26397777-26397934	0	0	0	0
ONG0800670	Chr8:26248910-26249917	Chr8:26157970-26158977	Chr8:27714243-27715250	Chr8:26708857-26709868	Chr8:27311893-27312904	Chr8:26871100-26872111	Chr8:27000793-27001800	Chr8:27122356-27123367	Chr8:26624820-26625827	Chr8:26514860-26515867	Chr8:26964703-26965708	Chr8:26173547-26174558	Chr8:26582189-26583200	Chr8:25424810-25425821	Chr8:25519256-25520267	Chr8:26409572-26410583	Chr8:22536689-22537700	Chr8:22541988-22542999	Chr8:25612423-25613427	Chr8:25732141-25733109
ONG0900010	Chr9:515881-516183	Chr9:555565-555867	Chr9:475136-475438	Chr9:482400-482720	Chr9:510919-511239	Chr9:522750-523052	Chr9:432743-433045	Chr9:729544-729866	Chr9:492777-493079	Chr9:450170-450472	Chr9:483465-483767	Chr9:582774-583078	Chr9:727680-727984	Chr9:601785-602089	Chr9:765340-765644	Chr9:890832-891131	Chr9:344889-345190	Chr9:344075-344376	0	Chr9:497031-497335
ONG0900020	Chr9:592800-593958	Chr9:632557-633715	Chr9:540118-541275	Chr9:547480-548638	Chr9:588740-588939	Chr9:587639-588797	Chr9:497722-498880	Chr9:800500-801659	Chr9:563251-564409	Chr9:549373-550527	Chr9:582651-583691	Chr9:651064-652222	Chr9:821261-822391	Chr9:670319-671477	Chr9:833918-835076	Chr9:957943-959079	Chr9:435789-436851	0	Chr9:536123-537204	0
ONG0900030	Chr9:932006-932486	Chr9:971894-972374	Chr9:879408-879888	Chr9:892963-893443	Chr9:927172-927652	Chr9:921724-922204	Chr7:2749728-2750207,Chr9:831874-832354	Chr9:1096687-1097167	Chr9:845794-846272	Chr9:857221-857701	Chr9:890536-891016	Chr9:959664-960144	Chr9:1149383-1149863	Chr9:966582-967062	Chr9:1130020-1130500	Chr9:1301865-1302346	Chr9:714762-715243	Chr9:744253-744734	Chr9:944695-945177	Chr9:923949-924437
ONG0900040	Chr9:1338818-1339266	Chr9:1378666-1379114	Chr9:1305146-1305594	Chr9:1299743-1300191	Chr9:1333953-1334401	Chr9:1328543-1328991	Chr9:1242920-1243368	Chr9:1458443-1458891	Chr9:1253797-1254245	Chr9:1281167-1281615	Chr9:1309399-1309847	Chr9:1387558-1388009	Chr9:1576547-1576997	Chr9:1327917-1328365	Chr9:1491667-1492115	Chr9:1727942-1728389	Chr9:1049607-1050052	Chr9:1072080-1072525	Chr9:1383175-1383623	0
ONG0900050	0	0	0	0	0	0	0	Chr9:1660447-1662986	0	0	0	0	0	Chr9:1529739-1532271	Chr9:1693511-1696043	0	0	0	0	0
ONG0900060	Chr9:1445038-1445342	Chr9:1484858-1485162	Chr9:1411340-1411644	Chr9:1418341-1418645	Chr9:1440153-1440457	Chr9:1434742-1435046	Chr9:1361128-1361432	Chr9:1546097-1546368	Chr9:1360030-1360334	Chr9:1378163-1378467	Chr9:1406401-1406705	0	0	Chr9:2261213-2261517,9:1415432-1415703	Chr9:2434184-2434488,Chr9:1579183-1579454	Chr9:2772326-2772630	Chr9:1165484-1165788	Chr9:1187752-1188056	Chr9:1565871-1566172	0
ONG0900070	0	0	0	0	0	0	0	Chr9:2623176-2625679	0	0	0	Chr9:2783491-2796914	Chr9:2975480-2988902	Chr9:2494741-2497244	Chr9:2660054-2662557	Chr9:3086182-3088657	0	0	0	0
ONG0900080	Chr9:4439541-4439631	Chr9:4480140-4480230	Chr9:4420410-4420500	Chr9:4518905-4518995	Chr9:4436978-4437068	Chr9:4434356-4434446	Chr9:4410505-4410595	Chr9:3814566-3814656	Chr9:4413850-4413940	Chr9:4022527-4022617	Chr9:4148006-4148096	Chr9:4345606-4345696	Chr9:4472730-4472820	Chr9:3795622-3795712	Chr9:3930446-3930536	Chr9:4676400-4676490	Chr9:3252981-3253071	Chr9:3418094-3418184	Chr9:4202390-4202480	0
ONG0900090	0	0	0	0	0	0	0	Chr9:3847897-3848141	0	0	0	Chr9:4378686-4378912	Chr9:4505792-4506018	Chr9:3828954-3829138	Chr9:3963776-3963960	0	0	0	0	0
ONG0900100	Chr9:4721189-4722587	Chr9:4761862-4763260	Chr9:4699033-4700431	Chr9:4800339-4801737	Chr9:4718770-4720168	Chr9:4716149-4717547	Chr9:4680934-4682332	Chr9:4056386-4061295	Chr9:4692844-4694242	Chr9:4299443-4300841	Chr9:4424949-4426329	Chr9:4630945-4635850	Chr9:4766512-4771419	Chr9:4037290-4042196	Chr9:4172337-4177246	Chr9:5070779-5072193	Chr9:3552352-3553753	Chr9:3702412-3703848	Chr9:4562735-4578277	0
ONG0900110	Chr9:5078802-5078859	Chr9:5119547-5119604	Chr9:5270455-5270512	Chr9:5157667-5157724	Chr9:5076534-5076591	Chr9:5073768-5073825	Chr9:5281316-5281373	Chr9:4420688-4420745	Chr9:5259227-5259284	Chr9:4811561-4811618	Chr9:4926361-4926418	Chr9:5042545-5042602	Chr9:5178281-5178338	Chr9:4398773-4398830	Chr9:4545161-4545218	Chr9:5413122-5413179	Chr9:3926204-3926263	Chr9:4040303-4040362	Chr9:4971037-4977819	0
ONG0900120	Chr9:5096337-5098217	Chr9:5137080-5138962	Chr9:5287944-5289821	Chr9:5175200-5177090	Chr9:5094067-5095947	Chr9:5091302-5093182	Chr9:5298850-5300738	Chr9:4439365-4441236	Chr9:5276764-5278648	Chr9:4829099-4830981	Chr9:4945044-4946915	Chr9:5061299-5063171	Chr9:5197031-5198903	Chr9:4417449-4419320	Chr9:4563840-4565711	Chr9:5431660-5433533	Chr9:3931048-3933048	Chr9:4045145-4047145	Chr9:4971037-4977819	Chr9:4600824-4602727
ONG0900130	Chr9:5692620-5693148	Chr9:5733334-5733862	Chr9:5884345-5884873	Chr9:5780749-5781275	Chr9:5690460-5690988	Chr9:5688087-5688615	Chr9:5904067-5904595	Chr9:5008564-5009070	Chr9:5880443-5880971	Chr9:5602490-5603016	Chr9:5478649-5479155	Chr9:5589308-5589848	Chr9:5716223-5716763	Chr9:5113305-5113811	Chr9:5150324-5150864	Chr9:5985638-5986183	Chr9:4528973-4529513	Chr9:4642904-4643444	Chr9:5536507-5536994	0
ONG0900140	Chr9:6301806-6301971	Chr9:6342531-6342696	Chr9:6493612-6493777	Chr9:6392480-6392723	Chr9:6299846-6300011	Chr9:6297403-6297568	Chr9:6499690-6499855	Chr9:5551639-5551802	Chr9:6467633-6467798	Chr9:6200068-6200312	Chr9:6018832-6018990	Chr9:6141361-6141526	Chr9:6240868-6241113	Chr9:5652906-5653071	Chr9:5674893-5675138	Chr9:6589160-6589405	Chr9:4961073-4961318	Chr9:5048488-5048733	0	0
ONG0900150	Chr9:6660591-6660750	Chr9:6701339-6701498	Chr9:6852309-6852468	Chr9:6717702-6717861	Chr9:6673182-6673341	Chr9:6656280-6656439	Chr9:6873618-6873777	Chr9:5910632-5910791	Chr9:6885617-6885776	Chr9:6616301-6616460	Chr9:6325093-6325252	Chr9:6502079-6502238	Chr9:6574325-6574484	Chr9:6014088-6014247	Chr9:6015720-6015879	Chr9:6987007-6987166	Chr9:5467360-5467536	Chr9:5455621-5455797	0	Chr9:6024082-6024242
ONG0900160	Chr9:6729865-6730220	Chr9:6770577-6770932	Chr9:6921540-6921895	Chr9:6788482-6788838	Chr9:6766687-6767042	Chr9:6725512-6725867	Chr9:6969958-6970313	Chr9:5979871-5980226	Chr9:6957505-6957860	Chr9:6686756-6687111	Chr9:6395906-6396261	Chr9:6573403-6573758	Chr9:6645664-6646019	Chr9:6085363-6085718	Chr9:6087048-6087403	Chr9:7059746-7060101	Chr9:5539157-5539512	Chr9:5527453-5527808	Chr9:6367111-6367468	Chr9:6102417-6102773	Chr9:10388363-10388713
ONG0900170	Chr9:7393344-7393731	Chr9:7347263-7347635	Chr9:7510447-7510819,WGGU01000371.1:79571-79958	Chr9:7377658-7378030	Chr9:7454989-7455361	Chr9:7302396-7302768	Chr9:7723363-7723758	Chr9:6562889-6563276	Chr9:7585170-7585565	Chr9:7217589-7217965	Chr9:6969334-6969697	Chr9:7107882-7108254	Chr9:7206893-7207265	Chr9:6600375-6600747	Chr9:6637460-6637832	Chr9:7608869-7609251	Chr9:5980840-5981235	Chr9:5958333-5958735	Chr9:6807907-6808302	0
ONG0900180	0	Chr9:7602322-7602630	Chr9:7765494-7765802	Chr9:7632664-7632972	Chr9:7714203-7714511	Chr9:7557532-7557840	Chr9:7992666-7992974	Chr9:6879301-6879609	Chr9:7910213-7910515	Chr9:7545788-7546097	Chr9:7210859-7211161	Chr9:7367047-7367355	Chr9:7516796-7517104	Chr9:6846657-6846965	Chr9:6951178-6951486	Chr9:7847498-7847800	Chr9:6209415-6209723	Chr9:6184511-6184819	Chr9:7103074-7103383	0
ONG0900190	Chr9:8060623-8065570	Chr9:7916066-7918020	Chr9:8079123-8081077	Chr9:7948913-7953850	Chr9:8046176-8048120	Chr9:7871240-7873194	Chr9:8312750-8314704	Chr9:7194711-7196655	Chr9:8266984-8268938	Chr9:7860067-7865016	Chr9:7570699-7575648	Chr9:7749455-7754400	Chr9:7850012-7854957	Chr9:7173755-7178700	Chr9:7513654-7518602	Chr9:8215475-8220420	Chr9:6599215-6604160	Chr9:6504597-6509471	Chr9:7631475-7632920	Chr9:7877364-7878589
ONG0900200	Chr9:8289394-8289700	Chr9:8151246-8151552,Chr10:6445282-6445575	Chr9:8328074-8328380	Chr9:8184267-8184573,Chr9:12126661-12126948	Chr9:8290288-8290594	Chr9:8115374-8115680	Chr9:8556878-8557184	Chr9:7465613-7465919	Chr9:8515199-8515505	Chr9:8106728-8107017,Chr10:6255303-6255596	Chr9:7839093-7839397,Chr10:6310567-6310860	Chr9:7966782-7967086,Chr9:11734094-11734381	Chr9:8067323-8067627,Chr9:11733955-11734242	Chr9:7391002-7391306,9:11584403-11584690	Chr9:7738573-7738877,Chr9:11682000-11682287	Chr9:8432794-8433098,Chr10:6112740-6113033	Chr9:8829156-8829431	Chr9:8625678-8625953	Chr9:7852960-7853264,Chr10:6089949-6090242	Chr6:6306491-6306790,Chr10:6240686-6240979
ONG0900210	Chr9:8933094-8933302	Chr9:8801605-8801813	Chr9:8934620-8934828	Chr9:8819177-8819386	Chr9:8945379-8945587	Chr9:8770442-8770650	Chr9:9211996-9212204	Chr9:7875554-7875762	Chr9:8922201-8922409	Chr9:8837096-8837304	0	Chr9:8368070-8368280	Chr9:8463917-8464127	Chr9:7785580-7785790	Chr9:8275790-8276000	Chr9:8837811-8838021	0	Chr9:6978756-6978963	Chr9:8342535-8342743	Chr9:8369695-8369904
ONG0900220	Chr9:8967044-8967132	Chr9:8838619-8838707	Chr9:8971587-8971675	Chr9:8852755-8852843	Chr9:8982396-8982484	Chr9:8807459-8807547	Chr9:9249013-9249101	Chr9:7913548-7913636	Chr9:8957261-8957349	Chr9:8872144-8872232	Chr9:8273256-8273344	Chr9:8400260-8400348	Chr9:8496107-8496195	Chr9:7830732-7830820	Chr9:8316798-8316886,Chr9:9010268-9010356	Chr9:8870035-8870123	0	0	0	0
ONG0900230	0	0	0	0	0	0	0	0	Chr9:9665495-9665721	Chr9:9663771-9663997	Chr9:9353542-9353768	Chr9:9244264-9244490	Chr9:9354464-9354690	Chr9:9084943-9085169	0	Chr9:10152039-10152265	Chr9:8050756-8050982	Chr9:7865303-7865529	Chr9:9260218-9260444	Chr9:9140531-9140757
ONG0900240	Chr9:9740084-9740201	Chr9:9610495-9610612	Chr9:9732509-9732626	Chr9:9709435-9709552	Chr9:10301308-10301425	Chr9:10128541-10128658	Chr9:10570095-10570212	Chr9:8649051-8649168	Chr9:9721048-9721165	Chr9:9719786-9719904	Chr9:9409470-9409588	Chr9:9299214-9299332	Chr9:9409548-9409666	Chr9:9139984-9140102	Chr9:9290427-9290545	Chr9:10206398-10206516	Chr9:8105144-8105262	Chr9:7916674-7916792	Chr9:9320928-9321046	Chr9:9217955-9218073
ONG0900250	0	0	0	0	0	0	0	0	0	0	0	0	0	Chr9:9918818-9919156	Chr9:10060415-10060753	0	0	0	0	0
ONG0900260	Chr9:10943511-10943577	Chr9:10686731-10686797	Chr9:10872545-10872611	Chr9:10860415-10860481	Chr9:11576665-11576731	Chr9:11126437-11126503	Chr9:11592510-11592576	Chr9:9759911-9759977	Chr9:10880185-10880251	Chr9:11119285-11119348	Chr9:10593858-10593924	Chr9:10665607-10665673	Chr9:10664497-10664563	Chr9:10343439-10343505	Chr9:10481631-10481697	Chr9:11344657-11344723	Chr9:9370953-9371019	Chr9:9155999-9156065	Chr9:10673024-10673090	0
ONG0900270	0	0	Chr9:11188049-11188256	0	0	0	Chr9:11939349-11939556	0	0	0	0	Chr9:10956148-10956355	Chr9:10955723-10955930	Chr9:10799934-10800141	Chr9:10787972-10788179	Chr9:11659741-11659948	Chr9:9701867-9702074	Chr9:9488761-9488968	Chr9:11253447-11253654	Chr9:10643129-10643336
ONG0900280	Chr9:11337372-11337598	Chr9:11273748-11273974	Chr9:11288477-11288703	Chr9:11277877-11278103	Chr9:11996545-11996771	Chr9:11686994-11687220	Chr9:12042759-12042985	Chr9:10180977-10181203	Chr9:11280363-11280589	Chr9:11719242-11719470	Chr9:11221775-11222003	Chr9:11061334-11061560	Chr9:11060863-11061089	Chr9:10903656-10903882	Chr9:10904599-10904825	Chr9:11776339-11776565	Chr9:9800581-9800808	Chr9:9587332-9587559	Chr9:11386406-11386632	Chr9:10776169-10776395
ONG0900290	0	0	0	0	0	0	0	0	0	0	0	Chr9:11168978-11169598	Chr9:11168461-11169081	Chr9:11011196-11011816	0	0	0	0	0	Chr9:10999837-11000457
ONG0901420	0	0	0	0	0	0	0	0	0	0	0	0	0	0	0	0	0	0	Chr9:7852960-7853264	0
ONG0900300	0	0	0	0	0	0	0	0	0	0	0	0	0	Chr9:11611554-11611976	0	0	0	0	0	0
ONG0900310	Chr9:12454518-12459886	Chr9:12530227-12535600	Chr9:12516315-12521675	Chr9:12489579-12494946	Chr9:13225342-13230713	Chr9:12907048-12912417	Chr9:12956011-12961369	Chr9:11371442-11376814	Chr9:12279476-12284838	Chr9:12945555-12950925	Chr9:12326882-12332245	Chr9:12096889-12102247	Chr9:12096749-12102109	Chr9:11945700-11951058	Chr9:12044510-12049868	Chr9:12964914-12970284	Chr9:10857365-10862716	Chr9:10544372-10549725	Chr9:12434005-12439376	0
ONG0900320	Chr9:12534635-12534900	Chr9:12610339-12610604	WGGU01000388.1:80861-81127	0	Chr9:13305454-13305719	0	0	Chr9:11451555-11451820	0	Chr9:13025661-13025926	0	Chr9:12501924-12502225,Chr9:12856683-12856984,Chr9:13114617-13114918	Chr9:12501804-12502105,Chr9:12856456-12856757,Chr9:13114470-13114771	Chr9:12349947-12350248,9:12704694-12704995,9:12948209-12948510	Chr9:12449307-12449608,Chr9:12803912-12804213,Chr9:13061703-13062004	0	0	0	Chr9:12516677-12516978	Chr4:21619599-21619892,Chr4:21808448-21808749
ONG0900330	Chr9:13203895-13204261	Chr9:13277335-13277701	Chr9:13213625-13213995	Chr9:13161738-13162108	Chr9:13922467-13922841	Chr9:13643191-13643557	Chr9:13615092-13615458	Chr9:12068565-12068939	Chr9:13009621-13009991	Chr9:13645823-13646193	Chr9:13007091-13007457	Chr9:12787419-12787785	Chr9:12787280-12787646	Chr9:12635557-12635923	Chr9:12734750-12735116	Chr9:13698013-13698379	Chr9:11488414-11488782	Chr9:11178140-11178508	Chr9:13183168-13183534	0
ONG0900340	Chr9:13316063-13316223	Chr9:13403549-13403709	Chr9:13330698-13330858	Chr9:13273999-13274159	Chr9:14034780-14034940	Chr9:13769419-13769579	Chr9:13741341-13741501	Chr9:12180873-12181033	Chr9:13121976-13122136	Chr9:13758108-13758268	Chr9:13129671-13129831	Chr9:12888422-12888582	Chr9:12888197-12888357	Chr9:12736437-12736597	Chr9:12835648-12835808	Chr9:13820622-13820782	Chr9:11586738-11586897	Chr9:11275975-11276134	0	0
ONG0900350	Chr9:14608264-14608958	Chr9:14938575-14939269	Chr9:14648894-14649588	Chr9:14582862-14583556	Chr9:15481135-15481829	Chr9:15453813-15454507	Chr9:15067065-15067759	Chr9:13668491-13669185	Chr9:14962948-14963642	Chr9:15038834-15039529	Chr9:14513430-14514124	Chr9:14078490-14079184	Chr9:14426564-14427258	Chr9:13914519-13915213	Chr9:14022076-14022770	Chr9:15226795-15227489	Chr9:12947950-12948306	Chr9:12559524-12560218	Chr9:14126256-14126950	0
ONG0900360	0	0	0	0	0	0	0	0	0	0	0	0	0	Chr9:14505285-14510719	0	0	0	0	0	0
ONG0900370	0	0	0	0	0	0	0	0	0	0	0	0	0	Chr9:15057054-15057199	0	0	0	0	0	0
ONG0900380	Chr9:16486045-16486133	Chr9:17167368-17167456	0	0	0	0	Chr9:16957197-16957285	Chr9:15598169-15598257	0	Chr9:17096705-17096793	0	Chr9:15980223-15980311	Chr9:16321887-16321975	Chr9:15885940-15886028	Chr9:15930070-15930158	Chr9:17158783-17158871	Chr9:14924286-14924378	Chr9:14386235-14386327	Chr9:16328853-16328941	0
ONG0900390	Chr9:16923255-16925860	Chr9:17592585-17595183	Chr9:16962463-16965067	Chr9:17209910-17212515	Chr9:17808537-17811133	Chr9:17797816-17800412	Chr9:17389005-17391601	Chr9:16023447-16026050	Chr9:17263632-17266229	Chr9:17528217-17530816	Chr9:16774950-16777312	Chr9:16447808-16450404	Chr9:16788984-16791583	Chr9:16352814-16355410	Chr9:16397396-16399992	Chr9:17626233-17628829	Chr9:15367231-15369836	Chr9:14830995-14833606	Chr9:16756343-16771693	0
ONG0900400	Chr9:17099136-17100106	Chr9:17768522-17769492	Chr9:17130991-17131961	Chr9:17381205-17382175	Chr9:17979702-17980676	Chr9:17969644-17970614	Chr9:17560833-17561803	Chr9:16195069-16196039	Chr9:17435337-17436307	Chr9:17697253-17698223	Chr9:16942193-16943163	Chr9:16643429-16644405	Chr9:16979924-16980900	Chr9:16536859-16537835	Chr9:16592872-16593848	Chr9:17810375-17811351	Chr9:15545918-15546896	Chr9:15020712-15021690	Chr9:16953331-16954135	Chr9:16906643-16907614
ONG0900410	0	0	0	0	0	0	0	0	0	0	0	0	0	Chr9:16968358-16968418	Chr9:17019264-17019324	0	Chr9:15983609-15983669	Chr9:15458017-15458077	0	0
ONG0900420	0	0	0	0	0	0	0	0	0	0	0	Chr9:17308135-17308521	Chr9:17644508-17644891	Chr9:17216614-17217000	Chr9:17257597-17257982	Chr9:18519015-18519329	0	0	0	0
ONG0900430	Chr9:19084481-19084688	Chr9:19747741-19747948	Chr9:19123895-19124102	Chr9:19375207-19375414	Chr9:19952998-19953205	Chr9:19948748-19948955	Chr9:19541065-19541272	Chr9:18182541-18182748	Chr9:19421974-19422181	Chr9:19654396-19654603	Chr9:18887313-18887520	Chr9:18489624-18489831	Chr9:18825005-18825212	Chr9:18389403-18389610	Chr9:18438745-18438952	Chr9:19664756-19664963	Chr9:17300165-17300372	Chr9:16773623-16773830	Chr9:18984334-18984541	0
ONG0900440	Chr9:19194940-19195015	Chr9:19858278-19858353	Chr9:19234321-19234396	Chr9:19485691-19485766	Chr9:20063485-20063560	Chr9:20059198-20059273	Chr9:19651517-19651592	Chr9:18300873-18300948	Chr9:19532426-19532501	Chr9:19772796-19772871	Chr9:19005591-19005666	Chr9:18607976-18608051	Chr9:18943387-18943462	Chr9:18507687-18507762	Chr9:18556999-18557074	Chr9:19783106-19783181	Chr9:17411642-17411717	Chr9:16885103-16885178	Chr9:19109351-19109426	0
ONG0900450	Chr9:19248167-19248308	Chr9:19911511-19911652	Chr9:19287491-19287632	Chr9:19538791-19538932	Chr9:20116714-20116855	Chr9:20113131-20113272	Chr9:19705453-19705594	Chr9:18365664-18365805	Chr9:19585685-19585826	Chr9:19826060-19826201	Chr9:19058873-19059014	Chr9:18661270-18661411	Chr9:18996756-18996897	Chr9:18572392-18572533	Chr9:18610332-18610473	Chr9:19836368-19836509	Chr9:17464983-17465123	Chr9:16938447-16938587	Chr9:19164927-19165068	0
ONG0900460	Chr9:19299610-19299945	Chr9:19962959-19963294	Chr9:19338921-19339256	Chr9:19590236-19590571	Chr9:20168157-20168493	Chr9:20169400-20169735	Chr9:19761716-19762051	Chr9:18441434-18441771	Chr9:19637131-19637466	Chr9:19880436-19880775	Chr9:19125860-19126196	Chr9:18737081-18737417	Chr9:19072527-19072863	Chr9:18648188-18648524	Chr9:18698074-18698410	Chr9:19912159-19912495	Chr9:17511546-17511882	Chr9:16985012-16985348	Chr9:19222969-19223181	0
ONG0900470	Chr9:19391826-19392225	Chr9:20055148-20055547	Chr9:19431066-19431465	Chr9:19682366-19682765	Chr9:20259921-20260320	Chr9:20261641-20262040	Chr9:19853943-19854342	Chr9:18512064-18512462	Chr9:19729356-19729755	Chr9:19954472-19954871	Chr9:19204252-19204650	Chr9:18815185-18815583	Chr9:19143120-19143518	Chr9:18719838-18720236	Chr9:18768719-18769117	Chr9:19990556-19990954	Chr9:17580660-17581058	Chr9:17059009-17059407	Chr9:19309764-19310162	0
ONG0900480	Chr9:19425254-19425937	Chr9:20088571-20089254	Chr9:19464483-19465165	Chr9:19715796-19716482	Chr9:20293356-20294042	Chr9:20295064-20295747	Chr9:19887365-19888048	Chr9:18543508-18546360	Chr9:19762782-19763465	Chr9:19985831-19988675	Chr9:19235726-19238460	Chr9:18846656-18849503	Chr9:19174558-19177405	Chr9:18744363-18747217	Chr9:18800158-18803005	Chr9:20022023-20024870	Chr9:17614421-17615127	Chr9:17092629-17093316	Chr9:19368950-19369007	0
ONG0900490	0	0	0	0	0	0	0	Chr9:20006575-20006676	0	0	0	Chr9:20320265-20320366	Chr9:20653440-20653542	Chr9:20198064-20198165	Chr9:20271559-20271659	Chr9:21430029-21430131	0	0	0	0
ONG0900500	Chr9:21237145-21238286	Chr9:22367489-22368626	Chr9:21172536-21173673	Chr9:21595337-21596474	Chr9:22116189-22117325	Chr9:22148767-22149904	Chr9:21665153-21666290	Chr9:20110681-20111817	Chr9:22174582-22175719	Chr9:21507876-21509013	Chr9:20752628-20753766	Chr9:20424025-20425161	Chr9:20757379-20758515	Chr9:20293432-20294568	Chr9:20369397-20370533	Chr9:21530732-21531868	Chr9:19114971-19116112	Chr9:18589310-18590447	Chr9:20934448-20935586	Chr9:20535922-20537567
ONG0900510	Chr9:22111078-22111239	Chr9:23248685-23248846	Chr7:11568348-11568512,Chr9:22046101-22046265	Chr9:22484237-22484401	Chr9:23000131-23000292	Chr9:22997792-22997953	Chr9:22514260-22514424	Chr9:21000848-21001009	Chr9:23040524-23040688	Chr9:22387374-22387535	Chr9:21654157-21654318	Chr9:21262976-21263140	Chr9:21666381-21666545	Chr9:21164025-21164189	Chr9:21266756-21266920	Chr7:11387613-11387777,Chr9:22404472-22404636	0	0	0	0
ONG0900520	0	0	0	0	0	0	0	0	0	0	0	Chr9:22036176-22036777	Chr9:22443304-22443905	Chr9:21930219-21930820	Chr9:22027160-22027761	Chr9:23168116-23168717	0	0	0	0
ONG0900530	Chr9:23790609-23791006	Chr9:25091701-25092100	Chr9:23757569-23757967	Chr9:24177854-24178251	Chr9:24641298-24641696	Chr9:24717306-24717709	Chr9:24189154-24189558	Chr9:22721237-22721634	Chr9:24715277-24715675	Chr9:24096901-24097565	Chr9:23339581-23339978	Chr9:22883382-22883779	Chr9:23247168-23247565	Chr9:22733655-22734052	Chr9:22830854-22831250	Chr9:23981744-23982142	0	0	0	0
ONG1000010	0	0	0	0	0	0	0	0	0	0	0	Chr10:2137945-2138064	0	Chr10:1801688-1801807	Chr10:1674894-1675013	Chr10:2019557-2019676	0	0	0	0
ONG1000020	Chr10:2523067-2523490	Chr10:2560348-2560773	Chr10:22783497-22783920	Chr10:2614279-2614702	Chr10:2642794-2643217	Chr10:2634423-2634846	Chr10:2508972-2509089	Chr10:2560140-2560564	Chr10:2612591-2612708	Chr10:2474964-2475387	Chr10:2586101-2586524	Chr10:2466891-2467315	Chr10:2458590-2459013	Chr10:2124555-2124978	Chr10:1981407-1981830	Chr10:2348773-2349196	Chr10:2597206-2597629	Chr10:2130382-2130805	Chr10:2435385-2435808	Chr10:2530762-2535627
ONG1000030	Chr10:3465760-3465917	Chr10:3532062-3532219	Chr10:21855971-21856127	Chr10:3526417-3526575	Chr10:3582463-3582620	Chr10:3541919-3542076	Chr10:3453658-3453815	Chr10:3532014-3532171	Chr10:3543367-3543524	Chr10:3376800-3376957	Chr10:3524554-3524711	Chr10:3332762-3332919	Chr10:3317876-3318033	Chr10:3016278-3016435	Chr10:2931031-2931188	Chr10:3324874-3325031	Chr10:3225390-3225547	Chr10:2972976-2973133	0	Chr10:3406207-3406364
ONG1000040	Chr10:5388902-5390335	Chr10:5517299-5518732	Chr10:20099196-20100628	Chr10:5342020-5343450	Chr10:5478846-5480277	Chr10:5372390-5373821	Chr10:5433704-5435136	Chr10:5603086-5604519	Chr10:5400136-5401567	Chr10:5285312-5286745	Chr10:5318508-5319940	Chr10:5099253-5100278	Chr10:5053734-5054755	Chr10:4615321-4616740	Chr10:4636573-4637592	Chr10:5123194-5124215	0	0	0	0
ONG1000050	0	0	0	Chr10:6042110-6042330	Chr10:6270183-6270403	Chr10:6059735-6059955	0	0	Chr10:6107497-6107717	0	0	Chr10:5843594-5843815	0	Chr10:5328770-5328991	Chr10:5361486-5361707	0	Chr10:5464038-5464258	Chr10:4923747-4923967	0	0
ONG1000060	Chr10:6412554-6412656	Chr10:6595303-6595405	Chr10:19062740-19062842	Chr10:6442973-6443075	Chr10:6680829-6680931	Chr10:6411515-6411617	Chr10:6456993-6457095	Chr10:6655496-6655598	Chr10:6470792-6470894	Chr10:6432159-6432261	Chr10:6487161-6487263	Chr10:6223739-6223841	Chr10:6189952-6190054	Chr10:5717208-5717310	Chr10:5750614-5750716	0	0	0	0	Chr10:6388115-6388451
ONG1000070	Chr10:6926360-6927237	Chr10:7074633-7075511	Chr10:18557670-18558549	Chr10:6917332-6918209	Chr10:7151831-7152708	Chr10:6853042-6853920	Chr10:6885936-6886813	Chr10:7169447-7170324	Chr10:7015600-7016477	Chr10:6907890-6908741	Chr10:6962196-6963079	Chr10:6724231-6725108	Chr10:6561699-6562577	Chr10:6190476-6191354	Chr10:6256384-6257262	Chr10:6702039-6702897	Chr10:6685450-6686330	Chr10:6097361-6098239	Chr10:6991952-6992835	0
ONG1000080	Chr10:6997019-6997402	Chr10:7157162-7157545	Chr10:18480140-18480523	Chr10:6983835-6984218	Chr10:7234388-7234771	Chr10:6919548-6919931	Chr10:6956580-6956963	Chr10:7240103-7240486	Chr10:7082108-7082491	Chr10:6977079-6977450	Chr10:7040338-7040709	Chr10:6644881-6645264	Chr10:6631939-6632322	Chr10:6277060-6277156	Chr10:6343276-6343372	Chr10:6771152-6771535	Chr10:6747249-6747628	Chr10:6159167-6159546	Chr10:7064538-7064634	Chr10:7006098-7006480
ONG1000090	Chr10:8324292-8324463	Chr10:8484787-8484958	Chr10:17123605-17123776	Chr10:7970427-7970598	Chr10:8562184-8562355	Chr10:7919202-7919373	Chr10:8381607-8381778	Chr10:8725225-8725396	Chr10:8064604-8064775	Chr10:8394636-8394807	Chr10:8343647-8343818	Chr10:8160958-8161129	Chr10:8175018-8175189	Chr10:7426074-7426245	Chr10:7484380-7484551	Chr10:8087642-8087813	Chr10:7548508-7548658	0	Chr10:7837258-7837429	Chr10:7991741-7991918
ONG1000100	Chr10:9346813-9349703	Chr10:9510633-9513523	Chr10:16098442-16101332	Chr10:9181468-9184360	Chr10:9588184-9591080	Chr10:9128232-9131127	Chr10:9582414-9585340,Chr10:9711771-9714665	Chr10:9953656-9956582	Chr10:9285298-9288194	Chr11:12130280-12133212,Chr11:11888054-11890949,ChrUN-Ctg59:35232-38127,Chr10:9261933-9264684	Chr10:9277727-9280659,Chr10:9607885-9610781	0	Chr10:9468151-9471109,Chr10:9031981-9034874,Chr10:9489021-9491978	Chr10:7967244-7970203	Chr10:8083702-8086661	Chr10:8954367-8957262,Chr10:8833495-8833790	Chr10:8077442-8080363	Chr10:7441392-7452047	0	0
ONG1000110	Chr10:9176423-9180807	Chr10:9340278-9344662	Chr10:16267308-16271692	Chr10:8813790-8816940	Chr10:9417805-9422189	Chr10:8751927-8755039	Chr10:9221325-9224437	Chr10:9587309-9590421	Chr10:8913316-8916429	Chr10:9141254-9144366,Chr11:12250121-12253230	Chr10:9081058-9084170	Chr10:8929814-8932926	Chr10:9046554-9049666	Chr10:7983323-7987075	Chr10:8099781-8103533	0	Chr10:8089485-8092673	Chr10:7460741-7463939	Chr10:8425132-8428332	Chr10:8632333-8635527
ONG1000120	Chr10:10250680-10250827	Chr10:10387323-10387470	Chr10:15206792-15206939	Chr10:9940957-9941104	Chr10:10465877-10466024	Chr10:9899022-9899169	Chr10:10612182-10612238	Chr10:10949978-10950034	Chr10:10042805-10042952	Chr10:10195691-10195838	Chr10:10444853-10445000	Chr10:9913738-9913885	Chr10:10328543-10328690	Chr10:8876710-8876857	Chr10:9060951-9061098	Chr10:9866490-9866637	Chr10:8704974-8705121	Chr10:8331163-8331310	Chr10:9356989-9357136	0
ONG1000130	Chr10:11521768-11521944	Chr10:11671699-11671875	Chr10:13922306-13922482	Chr10:11689874-11690047	Chr10:11754832-11755008	Chr10:11684746-11684922	Chr10:11715480-11715656	Chr10:12072287-12072463	Chr10:11786633-11786809	Chr10:11234903-11235079	Chr10:11441763-11441939	Chr10:10952432-10952608	Chr10:12027286-12027462	Chr10:9951293-9951469	Chr10:10149651-10149827	Chr10:10961966-10962142	Chr10:9711836-9712011	Chr10:9273831-9274004	Chr10:10548995-10549171	0
ONG1000140	Chr10:11699383-11701993	Chr10:11849701-11852286	Chr10:13741772-13744356	Chr10:11867097-11869696	Chr10:11932825-11935393	Chr10:11862732-11865318	Chr10:11912362-11914975	Chr10:12269226-12271840	Chr10:11964196-11966809	Chr10:11404103-11406720	Chr10:11610990-11613606	Chr10:11141086-11143670	Chr10:12205275-12207860	Chr10:10184488-10185782	Chr10:10391788-10393084	Chr10:11144196-11146810	Chr10:9874735-9876014	Chr10:9464876-9466157	Chr10:10706116-10707398	0
ONG1000150	Chr10:11916123-11916459	Chr10:12074106-12074442	Chr10:13519546-13519882	Chr10:12083570-12083906	Chr10:12157280-12157616	Chr10:12087404-12087740	Chr10:12129067-12129403	Chr10:12485964-12486300	Chr10:12180929-12181265	Chr10:11620023-11620354	Chr10:11818790-11819121	Chr10:11365549-11365885	Chr10:12429686-12430022	Chr10:10410308-10410659	Chr10:10616512-10616863	Chr10:11365289-11365620	Chr10:10045949-10046189	Chr10:9652743-9652982	Chr10:10975025-10975387	Chr10:11084179-11084420
ONG1000160	0	0	0	0	0	0	0	0	0	0	0	0	0	Chr10:10506483-10506679	Chr10:10716640-10716836	0	Chr10:10150141-10150337	Chr10:9735730-9735926	Chr10:11087909-11088104	Chr10:11154720-11154915
ONG1000170	0	0	0	0	0	0	0	0	0	0	0	0	0	Chr10:10625220-10625270	Chr10:10835356-10835406	0	0	0	0	0
ONG1000180	0	0	0	0	0	0	0	0	0	0	0	0	0	Chr10:10790062-10920944	Chr10:11000499-11113786	0	0	0	0	0
ONG1000190	0	0	0	0	0	0	0	0	0	0	0	0	0	Chr10:11111256-11111392	Chr10:11304155-11304290	0	0	0	0	0
ONG1000200	Chr10:13410807-13410879	Chr10:13492276-13492609	Chr10:12071375-12071447	Chr10:13547256-13547328	Chr10:13536493-13536565	Chr10:13477444-13477516	Chr10:13527805-13527877	Chr10:13909127-13909199	Chr10:13587258-13587330	Chr10:13105694-13105766	Chr10:13290570-13290642	Chr10:12913372-12913443	Chr10:13921483-13921555	Chr10:11789333-11789679	Chr10:11967615-11967686	Chr10:12872950-12873022	Chr10:11448755-11449101	Chr10:10973834-10974176	Chr10:12607503-12607849	0
ONG1000210	Chr10:13660140-13660306	Chr10:13670298-13670464	Chr10:11860040-11860206	Chr10:13728450-13728616	Chr10:13774417-13774583	Chr10:13692832-13692998	Chr10:13730062-13730228	Chr10:14103073-14103239	Chr10:13789488-13789654	Chr10:13286915-13287081	Chr10:13471703-13471869	Chr10:13104898-13105064	Chr10:14136652-14136818	Chr10:11974799-11974965	Chr10:12159209-12159375	Chr10:13054201-13054367	Chr10:11654597-11654763	Chr10:11201289-11201455	Chr10:12789314-12789480	0
ONG1000220	Chr10:13760199-13760317	Chr10:13766413-13766531	Chr10:11760825-11760943	Chr10:13823783-13823901	Chr10:13873580-13873698	Chr10:13792201-13792319	Chr10:13825740-13825858	Chr10:14202400-14202518	Chr10:13885231-13885349	Chr10:13393924-13394042	Chr10:13578715-13578833	Chr10:13200589-13200707	Chr10:14231752-14231870	Chr10:12072500-12072618	Chr10:12254939-12255057	Chr10:13161196-13161314	Chr10:11749669-11749787	Chr10:11296072-11296190	Chr10:12895561-12895679	Chr10:12912697-12912811
ONG1000230	Chr10:14796362-14796645	Chr10:14765103-14765386	Chr10:10721892-10722175	Chr10:14749766-14750048	Chr10:14866075-14866358	Chr10:14717976-14718259	Chr10:14855908-14856191	Chr10:15263589-15263872	Chr10:14924041-14924324	Chr10:14367170-14367453	Chr10:14551722-14552005	Chr10:14240712-14240995	Chr10:15096248-15096531	Chr10:12889205-12889488	Chr10:13311968-13312251	Chr10:14143307-14143590	0	0	0	0
ONG1000240	0	Chr10:14999826-14999914	0	0	0	0	0	Chr10:15506205-15506293	0	Chr10:14611480-14611568	Chr10:14795933-14796021	Chr10:14485841-14485929	Chr10:15338066-15338154	Chr10:13118206-13118294	Chr10:13554413-13554501	Chr10:14387669-14387757	Chr10:12846792-12846877	Chr10:12250505-12250590	Chr10:13820348-13820436	0
ONG1000250	Chr10:15360974-15361047	Chr10:15361510-15361583	Chr10:10154248-10154321	Chr10:15306864-15306937	Chr10:15430874-15430947	Chr10:15272655-15272728	Chr10:15420882-15420955	Chr10:15836691-15836764	Chr10:15488817-15488890	Chr10:14947917-14947990	Chr10:15132379-15132452	Chr10:14805271-14805344	Chr10:15657584-15657657	Chr10:13435663-13435736	Chr10:13882632-13882704	Chr10:14707131-14707204	0	0	Chr10:14107150-14107216	0
ONG1000260	Chr10:15899612-15899737	Chr10:15896253-15896378	Chr10:9616087-9616212,Chr10:9357857-9357982	Chr10:15843385-15843510	Chr10:15969475-15969600	Chr10:15811283-15811408	Chr10:15959859-15959984	Chr10:16375289-16375414	Chr10:16027237-16027362	Chr10:15493666-15493791,Chr7:24153041-24153166	Chr10:15678026-15678151,Chr7:23995301-23995426	Chr10:15345786-15345911,Chr7:23968175-23968300,Chr10:15593038-15593163,Chr10:16588528-16588653	Chr10:16195661-16195786,Chr7:25140989-25141114,Chr10:16446140-16446265,Chr10:17549476-17549601	Chr10:13968458-13968583,10:14211553-14211678,10:15197618-15197743	Chr10:14428189-14428314,Chr7:24014478-24014603,Chr10:14678664-14678789,Chr10:15672243-15672368	Chr10:15255983-15256108,Chr7:24296520-24296645,Chr10:15506703-15506828	Chr10:13679844-13679969,Chr10:13783198-13783323,Chr10:13901251-13901376	Chr10:13065079-13065204,Chr10:13199647-13199772,Chr10:13303715-13303840	Chr7:24614998-24615123	Chr10:14831315-14831436
ONG1000270	0	0	0	0	0	0	0	0	0	0	0	Chr10:15407168-15407236	Chr10:16257060-16257128	Chr10:14029580-14029648	Chr10:14489594-14489662	Chr10:15317387-15317455	0	0	0	0
ONG1000280	0	0	Chr10:9357857-9357982	0	0	0	0	0	0	0	0	Chr10:15593038-15593163	Chr10:16446140-16446265	Chr10:14211553-14211678	Chr10:14678664-14678789	Chr10:15506703-15506828	Chr10:13783198-13783323	Chr10:13199647-13199772	Chr7:24614998-24615123	Chr10:14831315-14831436
ONG1000290	Chr10:16423600-16426157	Chr10:16439143-16441700	Chr10:9009376-9011933	Chr10:16367667-16370224	Chr10:16510756-16513313	Chr10:16340680-16343237	Chr10:16483586-16486143	Chr10:16916152-16918709	Chr10:16556665-16559222	Chr10:16051026-16053584	Chr10:16246915-16249473	Chr10:15922713-15925270	Chr10:16770192-16772749	Chr10:14533445-14536002	Chr10:15006387-15008944	Chr10:15831765-15834323	Chr10:14174452-14177627	Chr10:13576868-13580043	0	0
ONG1000300	0	0	0	0	0	0	0	0	0	0	0	Chr10:16588528-16588653	Chr10:17549476-17549601	Chr10:15197618-15197743	Chr10:15672243-15672368	0	Chr10:13901251-13901376	Chr10:13303715-13303840	Chr7:24614998-24615123	Chr10:14831315-14831436
ONG1000310	0	0	0	0	0	0	0	0	0	0	0	Chr10:16597138-16597395	Chr10:17558078-17558335	Chr10:15206198-15206455	Chr10:15680860-15681117	0	0	0	0	0
ONG1000320	0	0	0	0	0	0	0	0	0	0	0	0	0	Chr10:15884410-15884482	0	0	0	0	0	0
ONG1000330	0	0	0	0	0	0	0	0	Chr10:18175460-18175975	Chr10:17712479-17712994	Chr10:17897441-17897956	0	0	Chr10:16281818-16282333	0	Chr10:17518841-17519356	0	0	0	0
ONG1000340	Chr10:18066745-18067086	Chr10:18080582-18080923	Chr10:7384935-7385276	Chr10:17999850-18000191	Chr10:18145323-18145664	Chr10:17974932-17975273	Chr10:18130048-18130389	Chr10:18536187-18536528	Chr10:18187642-18187987	Chr10:17724666-17725011	Chr10:17909631-17909976	0	0	Chr10:16292552-16292897	0	Chr10:17531029-17531374	0	0	0	0
ONG1000350	Chr10:18405841-18406312	Chr10:18330992-18331463	Chr10:7038560-7039022	Chr10:18330885-18331356	Chr10:18395724-18396195	Chr10:18313761-18314232	Chr10:18468874-18469345	Chr10:18772370-18772841	Chr10:18377766-18378237	Chr10:17914801-17915272	Chr10:18098913-18099384	Chr10:18154388-18154859	Chr10:19109885-19110356	Chr10:16479183-16479654	Chr10:16948571-16949042	Chr10:17721205-17721676	0	0	0	0
ONG1000360	0	0	0	0	0	0	0	0	0	0	0	Chr10:18830078-18830151	Chr10:19772617-19772690	Chr10:17130120-17130193	0	0	0	0	Chr10:17871325-17871398	0
ONG1000370	Chr10:19102423-19102624	Chr10:18998694-18998895	Chr10:6373481-6373682	Chr10:19000792-19000992	Chr10:19073979-19074179	Chr10:18980777-18980978	Chr10:19135940-19136141	Chr10:19454216-19454417	Chr10:19042072-19042273	Chr10:18580428-18580628	Chr10:18761779-18761979	Chr10:18871662-18871862	Chr10:19814161-19814361	Chr10:17165659-17165857	Chr10:17603399-17603600	Chr10:18386879-18387079	Chr10:16609714-16609915	Chr10:16038952-16039151	Chr10:17906201-17906401	0
ONG1000380	0	0	Chr10:6212617-6212831	Chr10:19161270-19161484	Chr10:19234800-19235014	Chr10:19141695-19141909	Chr10:19296860-19297074	0	Chr10:19202904-19203118	0	0	0	0	Chr10:17318190-17318404	Chr10:17764196-17764410	0	0	0	0	0
ONG1000390	0	0	0	0	0	0	0	0	0	0	0	0	0	Chr10:17350382-17350498	0	0	0	0	0	0
ONG1000400	0	0	0	0	0	0	0	0	0	0	0	Chr10:20000571-20000773	Chr10:21009210-21009412	Chr10:18231158-18231360	Chr10:18769870-18770072	Chr10:19536311-19536513	Chr10:17742406-17742608	Chr10:17116607-17116809	Chr10:19289726-19289928	0
ONG1000410	Chr10:20770143-20770291	Chr10:20668649-20668797	Chr10:4726134-4726282	Chr10:20637464-20637559	Chr10:20695829-20696432	Chr10:20613809-20613904	Chr10:20748880-20749028	Chr10:21112112-21112716	Chr10:20681800-20681895	Chr10:20151451-20151599	Chr10:20409985-20410080	Chr10:20402269-20402417	Chr10:21398536-21398900	Chr10:18595465-18595829	Chr10:19153614-19153978	0	Chr10:18110096-18110238	Chr10:17488437-17488579	Chr10:19678742-19679347	0
ONG1000420	Chr10:21141388-21141525	Chr10:21039883-21040020	Chr10:4252990-4253127	Chr10:21004961-21005098	Chr10:21087284-21087421	Chr10:21008278-21008415	Chr10:21122342-21122479	Chr10:21483355-21483492	Chr10:21073085-21073223	Chr10:20490936-20491073	Chr10:20809260-20809397	Chr10:20741871-20742008	Chr10:21723443-21723580	Chr10:18915730-18915867	Chr10:19478674-19478811	Chr10:20347354-20347491	0	0	0	Chr10:19751679-19751818
ONG1000430	Chr10:21411943-21412214	Chr10:21310499-21310770	Chr10:3965676-3965947	Chr10:21274345-21274616	Chr10:21357105-21357376	Chr10:21292775-21292988	Chr10:21397402-21397673	Chr10:21753476-21753747	Chr10:21355904-21356175	Chr10:20759485-20759756	Chr10:21117327-21117598	Chr10:21009954-21010225	Chr10:21985204-21985475	Chr10:19192911-19193182	Chr10:19754896-19755167	Chr10:20617408-20617679	Chr10:18674661-18674921	Chr10:18028055-18028326	Chr10:20309921-20310192	Chr10:20008555-20008826	Chr10:24069568-24069840
ONG1000440	Chr10:21539506-21539641	Chr10:21438054-21438189	Chr10:3833440-3833575	Chr10:21402282-21402417	Chr10:21484731-21484866	Chr10:21455182-21455317	Chr10:21526450-21526585	Chr10:21881944-21882079	Chr10:21484063-21484198	Chr10:20921642-20921777	Chr10:21279614-21279749	Chr10:21138439-21138574	Chr10:22112734-22112869	Chr10:19349542-19349677	Chr10:19907145-19907280	Chr10:20779585-20779720	Chr10:18810117-18810238	Chr10:18162320-18162441	Chr10:20449662-20449797	0
ONG1000450	0	0	0	0	0	0	0	0	0	0	0	Chr10:21495619-21495945	0	Chr10:19720638-19720964	Chr10:20280979-20281305	0	0	0	0	0
ONG1000460	Chr10:22251708-22252089	Chr10:22148593-22148974	Chr10:3158911-3159292	Chr10:22082468-22082853	Chr10:22160568-22160949	Chr10:22173480-22173861	Chr10:22238828-22239209	Chr10:22594637-22595022	Chr10:22169820-22170201	Chr10:21579891-21580272	Chr10:21935780-21936161	Chr10:21835630-21836011	Chr10:22792574-22792955	Chr10:20070995-20071376	Chr10:20637207-20637588	Chr10:21436496-21436877	Chr10:19456040-19456420	Chr10:18810338-18810719	Chr10:21151982-21152327	Chr10:20844642-20845023
ONG1000470	Chr10:22325384-22325660	Chr10:22226513-22226789	Chr10:3081099-3081375	Chr10:22160391-22160667	Chr10:22238748-22239024	Chr10:22251396-22251672	Chr10:22312494-22312770	Chr10:22668308-22668584	Chr10:22247728-22248004	Chr10:21635553-21635829	Chr10:22013706-22013982	Chr10:21911994-21912270	Chr10:22869003-22869279	Chr10:20147422-20147698	Chr10:20713651-20713927	Chr10:21508301-21508577	Chr10:19532545-19532821	Chr10:18886915-18887191	Chr10:21232463-21232725	0
ONG1000480	0	0	0	0	0	0	0	0	0	Chr10:21954349-21997279	0	0	Chr10:23173146-23206067	Chr10:20451714-20484688	0	0	0	0	0	0
ONG1000490	0	0	0	0	0	0	0	0	0	0	0	Chr10:22800495-22800584	Chr10:23781092-23781181	Chr10:21067342-21067431	Chr10:21601586-21601675	Chr10:22467016-22467105	Chr10:20337491-20337580	Chr10:19689828-19689917	0	0
ONG1000500	Chr10:23546856-23549576	Chr10:23458824-23461546	Chr10:1863140-1865863	Chr10:23371585-23374309	Chr10:23454416-23457136	Chr10:23463781-23466501	Chr10:23533578-23536300	Chr10:23890095-23892815	Chr10:23463292-23466014	Chr10:22861055-22863753	Chr10:23242502-23245228	Chr10:23065012-23067714	Chr10:24045830-24048532	Chr10:21334663-21337365	Chr10:21866224-21868926	Chr10:22731733-22734435	Chr10:20601792-20604498	Chr10:19953976-19956682	0	0
ONG1000510	0	0	0	0	0	0	0	0	0	0	0	Chr10:23454170-23454402	Chr10:24434811-24435043	Chr10:21724117-21724349	Chr10:22255218-22255450	Chr10:23120938-23121170	0	0	0	0
ONG1000520	Chr10:24228169-24228345	Chr10:24140409-24140585	Chr10:1200157-1200332	Chr10:24057126-24057301	Chr10:24142029-24142204	Chr10:24151587-24151762	Chr10:24230574-24230749	Chr10:24572621-24572797	Chr10:24150788-24150963	Chr10:23514460-23514635	Chr10:23897677-23897853	Chr10:23717669-23717844	Chr10:24698296-24698471	Chr10:21987626-21987801	Chr10:22517717-22517892	Chr10:23384450-23384625	Chr10:21251461-21251636	Chr10:20603554-20603729	Chr10:23608815-23608990	Chr10:22743924-22744102	Chr10:26710312-26710488
ONG1000530	Chr10:24683552-24687865	0	Chr10:740942-745255	Chr10:24513598-24517915	Chr10:24598643-24602958	Chr10:24608071-24612377	0	0	Chr10:24608586-24612898	Chr10:23971969-23976282	Chr10:24352943-24357213	Chr10:24174361-24178674	Chr10:25158821-25163114	Chr10:22444952-22449265	Chr10:22967302-22971611	Chr10:23840354-23844667	0	0	0	0
ONG1000540	Chr10:24874103-24874382	Chr10:24816370-24816649	Chr10:550636-550915	Chr10:24704456-24704735	Chr10:24818038-24818317	Chr10:24798651-24798930	Chr10:24877406-24877684	Chr10:25221663-25221942	Chr10:24799264-24799543	Chr10:24186047-24186325	Chr10:24564641-24564919	Chr10:24389823-24390101	Chr10:25352222-25352500	Chr10:22657201-22657479	Chr10:23183173-23183451	Chr10:24052548-24052826	Chr10:21894097-21894376	Chr10:21252252-21252531	Chr10:24259604-24259882	0
ONG1000550	Chr10:24948663-24948852	Chr10:24891070-24891259	Chr10:475839-476240	Chr10:24778600-24779001	Chr10:24892676-24893077	Chr10:24873090-24873491	Chr10:24951357-24951758	Chr10:25296433-25296834	Chr10:24873635-24874036	Chr10:24260130-24260319	Chr10:24638988-24639177	Chr10:24450989-24451390	Chr10:25425724-25425913	Chr10:22731492-22731893	Chr10:23244342-23244743	Chr10:24127317-24127718	Chr10:21953752-21954153	Chr10:21311868-21312269	Chr10:24318982-24319383	Chr10:23593395-23593771	Chr10:27403505-27403913
ONG1000560	0	0	0	0	0	0	0	Chr10:25335663-25338669	0	0	0	Chr10:24490249-24493255	0	Chr10:22770722-22773728	Chr10:23283568-23286574	Chr10:24166329-24169334	0	0	0	0
ONG1100010	0	Chr11:76518-76981,Chr12:72730-72895	Chr11:64957-65420,Chr12:60582-60747	Chr11:65206-65669,Chr12:60368-60533	Chr11:57816-58265	Chr11:64533-64982,Chr12:66795-66960	Chr11:64666-65115,Chr12:42736-42901	Chr11:76303-76766	Chr11:46988-47451,Chr12:67283-67448	Chr11:62258-62707,ChrUN-Ctg64:72254-72560	Chr11:64762-65225,Chr12:59161-59624	Chr11:56140-56589	Chr11:45400-45849,Chr12:53944-54393	Chr11:20507-20956,12:18914-19363	Chr11:57474-57913,Chr12:56122-56571	Chr11:56401-56850	Chr11:37510-37973,Chr12:74122-74585	Chr11:69276-69739,Chr12:4351-4814,Chr12:22152-22615	ChrUN-Ctg67:32286-32752,ChrUN-Ctg66:16174-16575	Chr11:57621-57927,Chr12:30411-30719
ONG1100020	Chr11:604256-604414	Chr11:726083-726241	Chr11:747126-747284	Chr11:747273-747431	Chr11:657487-657645	Chr11:663689-663847	Chr11:663849-664007	Chr11:758758-758916	Chr11:728356-728514	Chr11:659859-660017	Chr11:727569-727727	Chr11:654560-654718	Chr11:644251-644409	Chr11:619679-619837	Chr11:655979-656137	Chr11:653830-653988	Chr11:617247-617405	Chr11:807595-807753	Chr11:614437-614595	0
ONG1100030	Chr11:2016455-2016689	Chr11:2130865-2131099	Chr11:2166875-2167109	Chr11:2174040-2174274	Chr11:2100645-2100879	Chr11:2072671-2072905	Chr11:2064243-2064477	Chr11:2165186-2165420	Chr11:2130148-2130382	Chr11:2074558-2074792	Chr11:2036561-2036795	Chr11:2102036-2102270	Chr11:2096109-2096343	Chr11:2070560-2070794	Chr11:2106070-2106304	Chr11:2119528-2119762	0	0	0	0
ONG1100040	0	0	Chr11:3118012-3118062	0	0	0	0	Chr11:3207568-3207618	0	Chr11:3101297-3101347	0	Chr11:3113194-3113244	0	Chr11:3058650-3058700	Chr11:3104049-3104099	Chr11:3107897-3107947	0	0	0	0
ONG1100050	Chr11:3194717-3194833	Chr11:3283021-3283137	Chr11:3278261-3278377	Chr11:3340076-3340192	Chr11:3270596-3270711	Chr11:3244009-3244125	Chr11:3227777-3227893	Chr11:3368010-3368125	Chr11:3284656-3284772	Chr11:3261859-3261975	Chr11:3195303-3195419	Chr11:3274573-3274688	Chr11:3283419-3283534	Chr11:3219135-3219250	Chr11:3265638-3265753	Chr11:3267922-3268037	Chr11:3028637-3028762	Chr11:3213938-3214063	Chr11:3367411-3367536	Chr11:3215041-3215166
ONG1100060	0	0	0	0	0	0	0	0	0	0	0	Chr11:3555598-3555707	0	Chr11:3500264-3500373	Chr11:3546785-3546894	0	0	0	0	0
ONG1100070	Chr11:3608244-3608515	Chr11:3697378-3697649	Chr11:3742368-3742638	Chr11:3753104-3753375	Chr11:3690457-3690728	Chr11:3649821-3650092	Chr11:3633609-3633880	Chr11:3782638-3782909	Chr11:3699093-3699364	Chr11:3676317-3676587	0	Chr11:3760942-3761213	Chr11:3702430-3702678	Chr11:3684470-3684718	Chr11:3730471-3730719	Chr11:3681091-3681362	Chr11:3573105-3573354	Chr11:3765497-3765767	0	Chr11:3769288-3769535
ONG1100080	Chr11:3665081-3665343	Chr11:3754145-3754407	Chr11:3796381-3796645	Chr11:3809657-3809921	Chr11:3749321-3749585	Chr11:3706655-3706917	Chr11:3690444-3690706	Chr11:3839200-3839464	Chr11:3755639-3755903	Chr11:3732864-3733128	Chr11:3713266-3713530	Chr11:3817492-3817756	Chr11:3762730-3762992	Chr11:3744766-3745028	Chr11:3790782-3791044	Chr11:3737574-3737838	Chr11:3621683-3621947	Chr11:3814451-3814713	Chr11:3865948-3866212	0
ONG1100090	Chr11:3748159-3748372	Chr11:3827272-3827485	Chr11:3875416-3875629	Chr11:3888643-3888856	Chr11:3828403-3828616	Chr11:3788943-3789156	Chr11:3772732-3772945	Chr11:3921378-3921591	Chr11:3834749-3834962	Chr11:3811943-3812156	Chr11:3794497-3794710	Chr11:3896529-3896742	Chr11:3845149-3845362	Chr11:3826990-3827203	Chr11:3873204-3873417	Chr11:3816684-3816897	0	0	0	0
ONG1100100	Chr11:4386963-4387194	Chr11:4396671-4396903	Chr11:4456904-4457135	Chr11:4526215-4526446	Chr11:4467152-4467383	Chr11:4439788-4440019	Chr11:4423499-4423730	Chr11:4501261-4501492	Chr11:4472457-4472688	Chr11:4450721-4450952	Chr11:4313072-4313303	Chr11:4414822-4415053	Chr11:4351473-4351704	Chr11:4347047-4347278	Chr11:4386245-4386476	Chr11:4454998-4455229	Chr11:4221526-4221749	Chr11:4477463-4477686	Chr11:4509592-4509790	0
ONG1100110	Chr11:4494829-4499009	Chr11:4505730-4509912	Chr11:4564595-4568724	Chr11:4633687-4637869	Chr11:4577902-4582082	Chr11:4550529-4554709	Chr11:4534263-4538443	Chr11:4612574-4616754	Chr11:4580976-4585156	Chr11:4558630-4562810	0	Chr11:4526491-4530664	Chr11:4463093-4467265	Chr11:4453908-4458081	Chr11:4497852-4502025	Chr11:4568653-4572826	0	0	0	0
ONG1100120	Chr11:4666636-4668281	Chr11:4697705-4699350	Chr11:4743174-4744819	Chr11:4825740-4827385	Chr11:4751051-4751426	Chr11:4723667-4724042	Chr11:4706140-4707784	Chr11:4804456-4806101	Chr11:4760829-4762474	Chr11:4731843-4732218	Chr11:4600254-4601905	Chr11:4704596-4706247	Chr11:4646816-4648467	Chr11:4631520-4633171	Chr11:4675442-4677093	Chr11:4746502-4748153	Chr11:4524246-4525896	Chr11:4782164-4783813	Chr11:4804084-4805732	Chr11:4792456-4794097
ONG1100130	Chr11:4810616-4810757	Chr11:4850723-4850864	Chr11:4896211-4896352	Chr11:4978422-4978563	Chr11:4865379-4865519	Chr11:4837962-4838102	Chr11:4821011-4821151	Chr11:4957169-4957310	Chr11:4913506-4913647	Chr11:4852665-4852805	Chr11:4699409-4699549	Chr11:4843889-4844029	Chr11:4779949-4780089	Chr11:4764730-4764870	Chr11:4776395-4776535	Chr11:4847352-4847492	Chr11:4644971-4645110	Chr11:4899207-4899347	Chr11:4998504-4998644	Chr11:4905245-4905401
ONG1100140	Chr11:4940140-4940398	Chr11:4980364-4980623	Chr11:5049548-5049807	Chr11:5108052-5108310	Chr11:5005561-5005819	Chr11:4978146-4978404	Chr11:4961197-4961455	Chr11:5086917-5087175	Chr11:5043149-5043407	Chr11:5005093-5005352	Chr11:4777784-4778042	Chr11:4955741-4955999	Chr11:4882397-4882655	Chr11:4847903-4848161	Chr11:4858960-4859218	Chr11:4925588-4925846	0	0	0	0
ONG1100150	Chr11:5198030-5198120	Chr11:5240874-5240964	Chr11:5312359-5312449	Chr11:5389680-5389770	Chr11:5287207-5287297	Chr11:5259732-5259822	Chr11:5242841-5242931	Chr11:5368559-5368649	Chr11:5316675-5316765	Chr11:5258091-5258181	Chr11:5066944-5067034	Chr11:5259428-5259518	Chr11:5163841-5163931	Chr11:5164425-5164515	Chr11:5153784-5153874	Chr11:5215140-5215230	0	Chr11:5269581-5269674	Chr11:5481365-5481458	Chr11:5330988-5331081
ONG1100160	Chr11:5693680-5693810	Chr11:5739898-5740028	Chr11:5902034-5902164	Chr11:5877494-5877624	Chr11:5784936-5785066	Chr11:5757445-5757575	Chr11:5740581-5740711	Chr11:5837211-5837341	Chr11:5757567-5757697	Chr11:5736780-5736910	Chr11:5461032-5461162	Chr11:5849706-5849832	Chr11:5661752-5661882	Chr11:5753155-5753285	Chr11:5647313-5647439	Chr11:5692891-5693017	Chr11:5550211-5550337	Chr11:5764133-5764259	Chr11:5989325-5989454	0
ONG1100170	0	0	0	0	0	0	0	0	0	0	0	Chr11:5908891-5908981	0	Chr11:5809860-5809950	Chr11:5706503-5706593	Chr11:5752167-5752257	0	0	0	0
ONG1100180	Chr11:6485840-6486203	Chr11:6195928-6196291	Chr11:6580360-6580723	Chr11:6351361-6351722	Chr11:6254294-6254656	Chr11:6226759-6227122	Chr11:6209909-6210272	Chr11:6672134-6672496	Chr11:6253915-6254277	Chr11:6563351-6563699	Chr11:6290751-6291111	Chr11:6213575-6213937	Chr11:6342497-6342901	Chr11:6114032-6114394	Chr11:6011217-6011579	Chr11:6056795-6057157	Chr11:6069775-6070137	Chr11:6301562-6301924	Chr11:6656036-6656369	0
ONG1100190	Chr11:6507392-6507457	Chr11:6217482-6217548	Chr11:6601916-6601982	Chr11:6372896-6372962	Chr11:6275832-6275898	Chr11:6248295-6248361	Chr11:6231448-6231514	Chr11:6693671-6693737	Chr11:6294067-6294133	Chr11:6584870-6584936	Chr11:6312147-6312213	Chr11:6235035-6235101	Chr11:6370385-6370451	Chr11:6135696-6135762	Chr11:6032882-6032948	Chr11:6078459-6078525	Chr11:6091512-6091578	Chr11:6323214-6323280	0	0
ONG1100200	0	Chr11:6759235-6759401	0	0	0	0	0	0	0	Chr11:7065370-7065536	Chr11:6737581-6737747	Chr11:6684151-6684317	Chr11:6802834-6803000	Chr11:6590965-6591131	Chr11:6498976-6499142	0	0	0	0	Chr11:6969463-6969627
ONG1100210	Chr11:7212976-7213427	Chr11:7163213-7163664	Chr11:7285333-7285785	Chr11:7199980-7200431	Chr11:7093443-7093894	Chr11:7066174-7066625	Chr11:7049360-7049810	Chr11:7409608-7410059	Chr11:7218813-7219266	Chr11:7401120-7401577	Chr11:7112084-7114201	Chr11:7082537-7082708	Chr11:7093098-7093269	Chr11:7145364-7145815	Chr11:6833404-6833859	Chr11:6798070-6798241	0	Chr11:6992680-6993239	Chr11:7493800-7494719	0
ONG1100800	Chr11:7208447-7208564	Chr11:7158685-7158802	0	0	Chr11:7088915-7089032	Chr11:7061646-7061763	Chr11:7044832-7044949	0	0	0	0	Chr11:7078013-7078130	Chr11:7088572-7088689	0	0	Chr11:6793546-6793663	0	0	0	0
ONG1100220	Chr11:8264593-8264747	Chr11:8240519-8240673	Chr11:8214763-8214916	Chr11:8264901-8265055	Chr11:8162238-8162392	Chr11:8134924-8135078	Chr11:8103208-8103362	Chr11:8365423-8365577	Chr11:8202645-8202799	Chr11:8469197-8469351	Chr11:8162560-8162714	Chr11:8164309-8164463	Chr11:8174250-8174404	Chr11:8278872-8279026	Chr11:7877537-7877691	Chr11:7890615-7890769	Chr11:7774325-7774476	Chr11:7916528-7916679	0	0
ONG1100230	Chr11:8370030-8371154	Chr11:8422621-8423745	Chr11:8416475-8417585	Chr11:8463380-8464504	Chr11:8344521-8345645	Chr11:8317191-8318315	Chr11:8208630-8209754	Chr11:8573690-8574802	Chr11:8405553-8406665	Chr11:8605568-8606693	Chr11:8358526-8359650	Chr11:8300482-8301606	Chr11:8310554-8311678	Chr11:8415015-8416139	Chr11:8019888-8021012	Chr11:8032754-8033878	Chr11:7866118-7867242	Chr11:8009232-8009391	Chr11:8875508-8876916	0
ONG1100240	Chr11:8455880-8456264	Chr11:8514093-8514477	Chr11:8512124-8512508	Chr11:8561165-8561549	Chr11:8436006-8436390	Chr11:8408671-8409055	Chr11:8294480-8294864	Chr11:8669335-8669719	Chr11:8501197-8501581	Chr11:8716460-8716843	Chr11:8455762-8456146	Chr11:8411393-8411776	Chr11:8421511-8421896	Chr11:8525921-8526304	Chr11:8130801-8131184	Chr11:8143682-8144065	Chr11:7950969-7951354	Chr11:8093035-8093420	0	0
ONG1100250	Chr11:9406132-9406553	Chr11:10281432-10281853	Chr11:10233033-10233448	Chr11:9517891-9518312	Chr11:9620496-9620917	Chr11:9593123-9593544	Chr11:9270279-9270700	Chr11:9579805-9580226	Chr11:9403041-9403462	Chr11:9538919-9539340	Chr11:9331962-9332383	Chr11:9233368-9233789	Chr11:9243857-9244278	Chr11:9306947-9307368	Chr11:8953292-8953713	Chr11:8991699-8992120	Chr11:8747826-8748247	Chr11:8882172-8882592	Chr11:10005684-10006103	Chr11:9598704-9599122
ONG1100260	Chr11:9605023-9605355	Chr11:10691417-10691749	Chr11:10409945-10410277	Chr11:9716770-9717102	Chr11:9966398-9966730	Chr11:9939006-9939338	Chr11:9469262-9469594	Chr11:9778655-9778987	Chr11:9748338-9748670	Chr11:9702836-9703168	Chr11:9494698-9495030	Chr11:9399871-9400203	Chr11:9410365-9410697	Chr11:9473073-9473405	Chr11:9119855-9120187	Chr11:9291873-9292205	Chr11:8966164-8966496	Chr11:9237805-9238137	0	Chr11:9856591-9856923
ONG1100270	0	0	0	0	0	0	0	0	0	0	0	Chr11:9425219-9425576	Chr11:9435723-9436080	Chr11:9498420-9498777	Chr11:9145202-9145559	0	Chr11:8991587-8991942	Chr11:9263230-9263585	0	Chr11:10046384-10046741,Chr11:9882026-9882384
ONG1100280	Chr11:10187778-10188604	Chr11:11304936-11305712	Chr11:10938854-10939680	Chr11:10300956-10301731	Chr11:10702593-10703368	Chr11:10674803-10675578	Chr11:10051153-10051928	Chr11:10370399-10371174	Chr11:10337944-10338719	Chr11:10269222-10270049	Chr11:10061994-10062750	Chr11:10156927-10161918	Chr11:10161982-10166975	Chr11:10228203-10233195	Chr11:9884871-9889869	Chr11:9966823-9967649	0	0	0	0
ONG1100290	Chr11:10680884-10680971	Chr11:11803082-11803169,Chr11:6798973-6799060	Chr11:11345195-11345282	Chr11:10798743-10798830	Chr11:11243003-11243090	Chr11:11214408-11214495	Chr11:10545709-10545796	Chr11:10868406-10868493	Chr11:10847354-10847441	Chr11:10713161-10713248	Chr11:10474230-10474317	Chr11:10664805-10664892	Chr11:10670220-10670307	Chr11:10735841-10735928	Chr11:10392443-10392530	Chr11:10271545-10271632	Chr11:10262734-10262822	Chr11:10507288-10507376	Chr11:11605851-11605938	0
ONG1100300	Chr11:10819728-10821133	Chr11:11945665-11947070	Chr11:11480085-11481491	Chr11:10929970-10931375	Chr11:11381591-11382994	Chr11:11352779-11354182	Chr11:10656124-10657530	Chr11:10999725-11001131	Chr11:10979986-10981392	Chr11:10850458-10851861	Chr11:10601739-10603144	Chr11:10787441-10788829	Chr11:10798477-10799864	Chr11:10857746-10859134	Chr11:10514894-10516282	Chr11:10394228-10395616	Chr11:10374012-10375412	Chr11:10614577-10615977	Chr11:11732204-11733471	0
ONG1100310	Chr11:11285855-11285921	Chr11:12375015-12375081	Chr11:11902189-11902255	Chr11:11342055-11342121	0	0	Chr11:11090978-11091044	Chr11:11422002-11422068	Chr11:11377200-11377266	0	0	Chr11:11160242-11160308	Chr11:11171029-11171095	Chr11:11229442-11229508	Chr11:10887503-10887569	Chr11:10767139-10767205	0	0	Chr11:12238686-12238752	0
ONG1100320	Chr11:12155415-12161484	Chr11:13245802-13251871	Chr11:12813097-12819170	Chr11:12141409-12147477	Chr11:12691699-12697773	Chr11:12660850-12666924	Chr11:11936494-11942568	Chr11:12276727-12282796	Chr11:12246411-12252481	0	Chr11:11128543-11134748	Chr11:11821912-11827963	Chr11:11833090-11839141	Chr11:11895286-11901338	Chr11:11549483-11555533	Chr11:11428984-11435034	Chr11:11404406-11410483	Chr11:11645748-11651827	Chr11:13010026-13019311	0
ONG1100330	0	0	Chr11:12924731-12924805	Chr11:12251094-12251168	0	0	Chr11:12037748-12037822	Chr11:12394474-12394548	0	0	0	Chr11:11887316-11887385	Chr11:11898606-11898675	Chr11:11960779-11960848	Chr11:11614985-11615054	Chr11:11491995-11492064	Chr11:11469366-11469440	Chr11:11710696-11710770	Chr11:13056991-13057068	0
ONG1100340	Chr11:12258040-12258250	Chr11:13348422-13348632	Chr11:12957187-12957395	Chr11:12283647-12283857	Chr11:12782702-12782912	Chr11:12751841-12752051	Chr11:12070282-12070492	Chr11:12427029-12427239	Chr11:12348902-12349112	0	Chr11:11044023-11044233	Chr11:11919841-11920051	Chr11:11931146-11931356	Chr11:11993729-11993939	Chr11:11647503-11647713	Chr11:11524535-11524745	Chr11:11501471-11501681	Chr11:11742805-11743015	Chr11:13093730-13093940	Chr11:12116878-12117087
ONG1100350	Chr11:13303170-13303817	0	Chr11:14090396-14091043	0	Chr11:14517439-14518086	Chr11:14184210-14184857	0	0	Chr11:13475462-13476109	Chr11:13259052-13259699	Chr11:13404288-13404935	Chr11:12960778-12961402	Chr11:12986409-12987033	Chr11:12915919-12916543	Chr11:12446908-12447532	Chr11:12362450-12363074	Chr11:12185598-12186249	Chr11:12846519-12847170	Chr11:14060908-14061527	0
ONG1100360	Chr11:13137922-13138079	0	Chr11:13995247-13995404	Chr11:13734091-13734248	Chr11:14422306-14422463	Chr11:14089128-14089285	Chr11:13202454-13202611	Chr11:14276642-14276799	Chr11:13266738-13266895	Chr11:13151812-13151969	0	Chr11:13066944-13067101	Chr11:13092610-13092767	Chr11:13022095-13022252	Chr11:12553146-12553303	Chr11:12468763-12468920	0	0	0	0
ONG1100370	Chr11:14061655-14061792	Chr11:14786955-14787092	Chr11:14899018-14899155	Chr11:14279729-14279866	Chr11:15331355-15331492	Chr11:14987984-14988121	Chr11:13828446-13828583	Chr11:14869130-14869267	Chr11:14409016-14409153	Chr11:14048928-14049065	Chr11:14186940-14187077	Chr11:13381649-13381786	Chr11:13407346-13407483	Chr11:13336570-13336707	Chr11:12867717-12867854	Chr11:12783370-12783507	Chr11:12593430-12593567	Chr11:13254371-13254508	Chr11:14834733-14834870	Chr11:13090992-13091129
ONG1100380	Chr11:14482066-14482254	Chr11:15243866-15244054	Chr11:15502467-15502655	Chr11:14758421-14758609	Chr11:15686784-15686972	Chr11:15343378-15343566	Chr11:14367948-14368136	Chr11:15419322-15419510	Chr11:14820654-14820842	Chr11:14404365-14404553	Chr11:14558963-14559151	Chr11:13678197-13678385	Chr11:13705177-13705365	Chr11:13572817-13573005	Chr11:13165682-13165870	Chr11:13081033-13081221	Chr11:12860768-12860955	Chr11:13523114-13523301	Chr11:15215932-15216120	0
ONG1100390	Chr11:15023995-15024360	Chr11:15786008-15786373	Chr11:16075440-16075782	Chr11:15384550-15384916	0	0	Chr11:15065075-15065417	Chr11:16093957-16094299	Chr11:15362633-15362998	0	Chr11:15105554-15105896	Chr11:14198940-14199305	Chr11:14219236-14219601	Chr11:14088936-14089301	Chr11:13691010-13691375	Chr11:13597497-13597862	Chr11:13309823-13310187	Chr11:13972107-13972471	0	0
ONG1100400	Chr11:15327300-15327970	Chr11:16089421-16090091	Chr11:16339069-16339738	Chr11:15706515-15707185	Chr11:16470775-16471445	Chr11:16127236-16127906	Chr11:15329312-15329981	Chr11:16358130-16358799	Chr11:15666007-15666677	Chr11:15223627-15224297	Chr11:15446205-15446875	Chr11:14659457-14664642	Chr11:14446636-14447305	Chr11:14548712-14553893	Chr11:14115131-14120316	Chr11:14021794-14026977	Chr11:13562019-13562699	Chr11:14224361-14225041	0	0
ONG1100410	Chr11:15972401-15972534	Chr11:16746749-16746882	Chr11:16928900-16929032	Chr11:16394397-16394530	Chr11:17227875-17228008	Chr11:16883931-16884064	Chr11:16008321-16008454	Chr11:17050555-17050848	Chr11:16311046-16311179	Chr11:15930116-15930249	Chr11:16181491-16181624	Chr11:14864288-14864417	Chr11:15146415-15146548	Chr11:14754011-14754140	Chr11:14320312-14320441	Chr11:14227118-14227247	Chr11:13968149-13968282	Chr11:14630216-14630349	Chr11:16579558-16579691	Chr11:15138225-15138504
ONG1100420	Chr11:16562072-16562178	Chr11:17348700-17348806	Chr11:17766821-17766931	Chr11:16987546-16987652	Chr11:17955965-17956071	Chr11:17611722-17611828	Chr11:16852921-16853031	Chr11:17905998-17906108	Chr11:16900796-16900902	Chr11:16526666-16526772	Chr11:16815065-16815171	Chr11:15420479-15420590	Chr11:16010919-16011029	Chr11:15309971-15310082	Chr11:14763069-14763180	Chr11:14795089-14795200	Chr11:14458037-14458148	Chr11:15129423-15129534	0	0
ONG1100430	0	0	Chr11:17924530-17924582	Chr11:17148178-17148230	0	Chr11:17788186-17788238	Chr11:17041429-17041481	Chr11:18096251-18096303	0	Chr11:16687969-16688021	0	Chr11:15542971-15543023	Chr11:16201131-16201183	Chr11:15432509-15432561	Chr11:14885557-14885609	Chr11:14917631-14917683	Chr11:14579914-14579966	Chr11:15253025-15253077	Chr11:17569686-17569738	0
ONG1100440	Chr11:17069022-17069109	Chr11:17855706-17855793	Chr11:18327928-18328015	Chr11:17569616-17569703	Chr11:18475130-18475217	Chr11:18162525-18162612	Chr11:17425541-17425628	Chr11:18480370-18480457	Chr11:17407759-17407846	Chr11:17035759-17035846	Chr11:17347135-17347222	Chr11:15900878-15900965	Chr11:16591574-16591661	Chr11:15786237-15786324	Chr11:15254589-15254676	Chr11:15275551-15275638	Chr11:14917818-14917905	Chr11:15563478-15563565	Chr11:17970761-17970848	Chr11:16194685-16194772
ONG1100450	0	0	0	0	0	0	0	0	0	0	0	Chr11:16328105-16328201	0	Chr11:16202526-16202622	Chr11:15675293-15675389	Chr11:15705900-15705996	0	0	0	Chr11:16626934-16627030
ONG1100460	Chr11:17598301-17598418	Chr11:18373321-18373438	Chr11:18892047-18892164	Chr11:18123969-18124086	Chr11:18992689-18992806	Chr11:18680638-18680757	Chr11:17940176-17940293	Chr11:18990938-18991055	Chr11:17927435-17927552	Chr11:17580507-17580624	Chr11:17866992-17867109	Chr11:16413335-16413452	Chr11:17107243-17107360	Chr11:16287732-16287849	Chr11:15760513-15760630	Chr11:15791128-15791246	Chr11:15353965-15354082	Chr11:15998569-15998686	Chr11:18503948-18504059	Chr11:16712090-16712201	Chr11:19269164-19269280
ONG1100470	Chr11:17784860-17785124,Chr11:17032792-17033056,Chr11:17830070-17830334	Chr11:17819473-17819737,Chr4:22273033-22273284,Chr11:18621180-18621444	Chr11:19139905-19140169	Chr11:18364406-18364670	Chr11:18438898-18439162,Chr11:19240482-19240746	Chr11:18126287-18126551,Chr11:18902908-18903172	Chr11:17389192-17389456,Chr11:18166510-18166774	Chr11:18444042-18444306,Chr11:19217201-19217465	Chr11:17371525-17371789,Chr11:18175386-18175650	Chr11:16999215-16999479,Chr11:17856864-17857128	Chr11:18130972-18131236	Chr11:16644814-16649828	Chr11:16555248-16555512,Chr11:17294053-17294317,Chr11:17339280-17339544	Chr11:16530620-16530878	Chr11:15991848-15996863	Chr11:15995118-15995376	0	0	0	Chr11:14580605-14580869,Chr11:16964472-16969580,Chr11:21221326-21221586,Chr12:2528726-2528986
ONG1100480	0	Chr11:18877378-18877500	0	0	0	Chr11:19159117-19159239	Chr11:18431053-18431175	Chr11:19473406-19473528	0	0	0	Chr11:16974713-16974835	0	Chr11:16782121-16782243	Chr11:16321745-16321867	Chr11:16280339-16280461	Chr11:15779680-15779802	0	Chr11:18953279-18953401	0
ONG1100490	0	0	WGGU01000521.1:314017-314362	0	Chr11:19674864-19675209	0	0	0	0	0	Chr11:18524175-18524521	Chr11:17126248-17126593	0	Chr11:16927728-16928073	Chr11:16473193-16473538	Chr11:16427397-16427742	Chr11:15921209-15921554	Chr11:16503311-16503656	0	0
ONG1100500	0	0	0	0	0	0	0	0	0	0	Chr11:19455806-19456212	0	0	Chr11:17630040-17630446	0	Chr11:17145566-17145972	0	0	0	0
ONG1100510	Chr11:19468942-19469036	Chr11:20070368-20070462	Chr11:20492258-20492351	Chr11:19649407-19649502	Chr11:20605116-20605210	Chr11:20079210-20079303	Chr11:19655625-19655719	Chr11:20627062-20627156	Chr11:19734368-19734462	Chr11:19226857-19226951	Chr11:19469764-19469857	Chr11:18056578-18056673	Chr11:18833147-18833241	Chr11:17643892-17643985	Chr11:17203664-17203757	Chr11:17159421-17159514	0	0	0	0
ONG1100520	Chr11:19588188-19588262	Chr11:20189770-20189844	Chr11:20606805-20606879	Chr11:19767280-19767354	Chr11:20718851-20718925	Chr11:20239695-20239769	Chr11:19770259-19770333	Chr11:20740806-20740880	Chr11:19848146-19848220	Chr11:19349347-19349421	Chr11:19608937-19609011	Chr11:18176150-18176224	Chr11:18947186-18947260	Chr11:17783384-17783458	Chr11:17343310-17343384	Chr11:17299070-17299144	0	0	Chr11:20120291-20120365	Chr11:18219053-18219127
ONG1100530	Chr11:20022142-20022303	Chr11:20708988-20709149	Chr11:21203003-21203158	Chr11:20285493-20285654	Chr11:21397102-21397263	Chr11:20812688-20812849	Chr11:20219845-20220006	Chr11:21378338-21378499	Chr11:20458983-20459144	Chr11:19792292-19792453	Chr11:20083695-20083856	Chr11:18733329-18733490	Chr11:19530717-19530878	Chr11:18299536-18299697	Chr11:17930354-17930515	Chr11:17660114-17660275	Chr11:17273608-17273769	Chr11:17848945-17849106	Chr11:20608873-20609034	Chr11:18724050-18724209	Chr11:22018294-22018455
ONG1100540	Chr11:20360945-20361185	Chr11:20973954-20974194	Chr11:21463634-21463874	Chr11:20541761-20542001	Chr11:21667193-21667433	Chr11:21088260-21088500	Chr11:20480973-20481213	Chr11:21643274-21643514	Chr11:20815268-20815508	Chr11:20057179-20057419	Chr11:20340813-20341053	Chr11:18999094-18999334	Chr11:19790632-19790872	Chr11:18550952-18551192	Chr11:18200409-18200649	Chr11:18002881-18003121	Chr11:17530174-17530414	Chr11:18106321-18106561	Chr11:20867658-20867898	Chr11:18980913-18981153
ONG1100550	Chr11:20480044-20480433	Chr11:21117674-21118063	Chr11:21609674-21610063	Chr11:20679554-20679943	Chr11:21804713-21805103	Chr11:21228266-21228657	Chr11:20637165-20637554	Chr11:21787815-21788204	Chr11:20943207-20943594	Chr11:20200927-20201316	Chr11:20482389-20482778	Chr11:19129638-19130027	Chr11:19928059-19928448	Chr11:18688431-18688820	Chr11:18337936-18338325	Chr11:18130407-18130796	Chr11:17646844-17647232	Chr11:18217858-18218245	Chr11:20880963-20881351	Chr11:19088467-19088857
ONG1100560	Chr11:21190837-21192409	Chr11:21868813-21870388	Chr11:22369459-22371031	Chr11:21458340-21459920	Chr11:22566235-22585570	Chr11:21895225-21896800	Chr11:21383668-21385460	Chr11:22563475-22565050	Chr11:21714377-21715952	Chr11:20891467-20893042	Chr11:21222582-21224157	Chr11:19761741-19806604	Chr11:20610885-20655690	Chr11:19358387-19403200	Chr11:18969508-19014456	Chr11:18760123-18804899	Chr11:18297123-18305163	Chr11:18884232-18892309	Chr11:21628956-21672842	Chr11:19976723-19982152
ONG1100570	0	0	0	Chr11:21591520-21591706	0	0	0	0	0	0	0	Chr11:19956460-19956646	Chr11:20805425-20805611	Chr11:19552824-19553010	0	Chr11:18945796-18945982	0	0	0	0
ONG1100580	Chr11:21504923-21505091	Chr11:22246545-22246713	Chr11:22664429-22664597	Chr11:21766903-21767072	Chr11:22888413-22888581	Chr11:22259709-22259877	Chr11:21696696-21696864	Chr11:22858797-22858965	Chr11:22010777-22010945	Chr11:21214795-21214963	Chr11:21537802-21537970	0	0	Chr11:19729303-19729471	0	0	0	Chr11:19220226-19220394	0	0
ONG1100590	Chr11:22385696-22385749	Chr11:22945211-22945264	Chr11:23398194-23398247	Chr11:22342544-22342597	Chr11:23629118-23629171	Chr11:23000109-23000162	Chr11:22495586-22495639	Chr11:23648486-23648539	Chr11:22796901-22796954	Chr11:21933696-21933749	Chr11:22132002-22132055	Chr11:20880191-20880243	Chr11:21674425-21674478	Chr11:20361488-20361541	Chr11:20093862-20093915	Chr11:19822755-19822808	Chr11:19210453-19210506	Chr11:19778473-19778526	Chr11:22552455-22552508	0
ONG1100600	0	Chr11:22985975-22986739	0	0	0	0	0	0	0	0	0	0	Chr11:21708577-21709345	Chr11:20395597-20396365	0	Chr11:19856907-19857675	0	0	0	Chr11:20990246-20991010
ONG1100610	Chr11:23970325-23970591	Chr11:24794821-24795019	Chr11:25008988-25009186	Chr11:23894203-23894406	Chr11:25394380-25394578	Chr11:24438154-24438351	Chr11:24206258-24206456	Chr11:25135859-25136061	Chr11:24706520-24706717	Chr11:23714112-23714378	Chr11:23855822-23856019	Chr11:22290592-22290858	Chr11:23284943-23285141	Chr11:21904032-21904230	Chr11:21555784-21556050	Chr11:21207750-21207948	Chr11:20578179-20578445	Chr11:21134068-21134334	0	Chr11:22515927-22516193
ONG1100620	Chr11:24304156-24304342	Chr11:25097746-25097931	Chr11:25411238-25411424	Chr11:24269537-24269723	Chr11:25697405-25697590	Chr11:24761411-24761597	Chr11:24509259-24509444	Chr11:25459134-25459320	Chr11:24960920-24961106	Chr11:24092117-24092303	Chr11:24230632-24230818	Chr11:22715176-22715362	Chr11:23592993-23593179	Chr11:22253999-22254185	Chr11:21980215-21980401	Chr11:21551450-21551636	Chr11:20853850-20854036	Chr11:21432755-21432941	Chr11:24526808-24526994	0
ONG1100630	0	0	0	0	0	0	0	0	0	0	0	Chr11:23018200-23018595	0	Chr11:22518805-22519200	0	0	0	0	0	0
ONG1100640	0	0	0	0	0	0	0	0	0	0	0	0	Chr11:24283251-24283380	Chr11:22938295-22938424	0	0	0	0	0	0
ONG1100650	Chr11:25128034-25128250	Chr11:26026070-26026286	Chr11:26240426-26240642	Chr11:25075712-25075928	Chr11:26531532-26531748	Chr11:25606147-25606363	Chr11:25310587-25310712	Chr11:26299110-26299326	Chr11:25853058-25853274	Chr11:24754894-24755110	Chr11:25120571-25120785	Chr11:23520744-23520960	Chr11:24446854-24447070	Chr11:23112159-23112375	Chr11:22787765-22787981	Chr11:22583994-22584210	Chr11:21560502-21560718	Chr11:22163537-22163753	0	0
ONG1100660	0	0	Chr11:26572830-26573143	Chr11:25409604-25409904	0	0	0	Chr11:26655888-26656187	0	0	0	Chr11:23868720-23869018	0	Chr11:23379505-23379803	0	0	0	0	Chr11:25561624-25561920	Chr11:23815405-23815717
ONG1100670	Chr11:25524468-25524601	0	Chr11:26707456-26707589	Chr11:25545290-25545423	Chr11:26896212-26896345	0	0	0	0	0	0	0	0	Chr11:23472693-23472826	0	0	Chr11:21834549-21834681	0	Chr11:25653001-25653132	0
ONG1100680	Chr11:25683542-25683688	Chr11:26534749-26534904	0	0	0	Chr11:26146225-26146360	0	0	0	Chr11:25234770-25234916	Chr11:25598341-25598487	0	0	Chr11:23632834-23632980	Chr11:23339348-23339494	Chr11:23231846-23231992	0	0	0	0
ONG1100690	Chr11:25714479-25714737	Chr11:26571082-26571338	Chr11:26882328-26882585	Chr11:25720166-25720423	0	0	Chr11:25884582-25884839	Chr11:26873901-26874157	Chr11:26418640-26418896	Chr11:25270970-25271225	Chr11:25634464-25634720	Chr11:24120653-24120909	Chr11:24974883-24975139	Chr11:23672236-23672490	Chr11:23375547-23375803	Chr11:23271243-23271496	0	0	0	0
ONG1100700	Chr11:26117695-26117779	Chr11:26978825-26978909	Chr11:27276175-27276259	Chr11:26114145-26114229	0	Chr11:26645042-26645126	Chr11:26286942-26287026	Chr11:27246348-27246432	Chr11:26887721-26887804	Chr11:25704071-25704150	Chr11:26066224-26066308	Chr11:24539647-24539731	Chr11:25356100-25356184	Chr11:24104518-24104602	Chr11:23759876-23759960	Chr11:23678703-23678787	Chr11:22374083-22374162	0	0	Chr11:24492115-24492194
ONG1100710	Chr11:26369530-26369734	Chr11:27194476-27194680	Chr11:27528176-27528380	Chr11:26365746-26365950	Chr11:27578899-27579103	Chr11:26896962-26897166	Chr11:26538868-26539072	Chr11:27473059-27473263	Chr11:27173885-27174089	Chr11:25985387-25985591	0	Chr11:24795995-24796199	Chr11:25590142-25590346	Chr11:24333318-24333522	Chr11:23990125-23990329	Chr11:23930868-23931072	Chr11:22517189-22517393	Chr11:23414612-23414816	0	Chr11:24699209-24699413
ONG1100720	Chr11:27514802-27514964	Chr11:28263595-28263757	Chr11:28454040-28454202	Chr11:27331631-27331794	Chr11:28832377-28832539	0	Chr11:27479753-27479915	Chr11:28617276-28617438	Chr11:28014625-28014787	0	0	Chr11:25840273-25840435	0	Chr11:25268452-25268614	0	Chr11:24875136-24875298	0	0	0	Chr11:25576099-25576261
ONG1100730	0	0	0	0	0	0	Chr11:27562477-27562621	0	0	0	0	Chr11:25919942-25920086	0	Chr11:25348532-25348676	0	Chr11:24955240-24955385	0	0	0	Chr11:25659661-25659805
ONG1100740	0	0	0	0	0	Chr11:28179226-28179378	0	0	0	Chr11:27783179-27783331	0	0	0	Chr11:25643709-25643861	0	0	0	0	0	0
ONG1100750	0	0	0	0	0	Chr11:28307173-28307282	0	0	0	Chr11:27896208-27896317	0	0	0	Chr11:25757460-25757569	0	0	0	0	0	0
ONG1100760	Chr11:28776547-28776676	Chr11:30055272-30055401	Chr11:29831830-29831959	0	Chr11:30213434-30213563	Chr11:29197411-29197540	0	Chr11:29912462-29912591	0	Chr11:28868062-28868191	Chr11:28935302-28935431	Chr11:27181437-27181566	Chr11:27863812-27863941	Chr11:26844029-26844158	0	Chr11:26422645-26422774	0	0	Chr11:29099977-29100106	0
ONG1100770	0	0	0	0	0	0	0	0	0	0	0	0	0	Chr11:27499356-27499445	0	0	0	0	0	0
ONG1100780	0	0	0	0	0	Chr11:30777640-30777864	0	0	0	0	0	0	0	Chr11:27767769-27767993	0	0	0	0	0	0
ONG1200010	Chr12:72424-72970	Chr12:232348-232895	Chr12:220417-220964	Chr12:220317-220864	Chr12:222122-222669	Chr12:226649-227196	Chr12:187633-188180	Chr12:224628-225175	Chr12:227149-227696	Chr12:102467-102792	Chr12:217632-217957	Chr12:69370-69916	Chr12:199308-199854	Chr12:164261-164807	Chr12:201402-201948	Chr12:71509-72055	0	0	0	0
ONG1200020	Chr12:101696-101925	0	0	0	0	0	0	0	0	Chr12:112000-112229	Chr12:246740-246969	Chr12:98643-98872	Chr12:228581-228810	Chr12:193534-193763	Chr12:230675-230904	Chr12:100782-101011	0	0	0	0
ONG1200030	Chr12:568286-568376	Chr12:712058-712148	Chr12:723035-723125	Chr12:686501-686591	Chr12:704919-705009	Chr12:709403-709493	Chr12:670415-670505	Chr12:727219-727309	Chr12:709930-710020	Chr12:619214-619305	Chr12:724816-724907	Chr12:608468-608559	Chr12:738690-738781	Chr12:657711-657802	Chr12:694946-695037	Chr12:609871-609962	0	0	Chr11:614437-614595	0
ONG1200040	0	0	0	0	0	0	0	0	0	0	0	Chr12:845390-845514	Chr12:975612-975736	Chr12:894146-894270	Chr12:931727-931851	Chr12:847095-847219	0	0	Chr12:889044-889168	0
ONG1200050	Chr12:2709457-2709676	Chr12:2850239-2850458	Chr12:2880703-2880922	Chr12:2891608-2891827	Chr12:2831823-2832042	Chr12:2835662-2835881	Chr12:2796671-2796890	Chr12:2870557-2870776	Chr12:2838103-2838322	Chr12:2791919-2792138	Chr12:2914268-2914487	Chr12:2760952-2761171	Chr12:2888884-2889103	Chr12:2801601-2801820	Chr12:2840137-2840356	Chr12:2755712-2755931	Chr12:2808109-2808328	Chr12:2795013-2795232	Chr12:2749615-2749835	0
ONG1200060	Chr12:2840221-2840350	Chr12:2964438-2964567	Chr12:2995360-2995489	Chr12:3004670-3004799	Chr12:2946070-2946199	Chr12:2966648-2966777	Chr12:2927648-2927777	Chr12:2984851-2984980	Chr12:2952350-2952479	Chr12:2904907-2905036	Chr12:3026420-3026549	Chr12:2876668-2876797	Chr12:3004808-3004937	Chr12:2916664-2916793	Chr12:2970687-2970816	Chr12:2871428-2871557	0	0	Chr12:2860839-2860968	0
ONG1200070	0	Chr12:3139935-3140092	Chr12:3170753-3170910	0	Chr12:3121534-3121691	Chr12:3147443-3147861	Chr12:3108447-3108865	Chr12:3172583-3173001	Chr12:3127712-3127869	0	0	0	Chr12:3181028-3181185	Chr12:3092206-3092363	Chr12:3146341-3146498	Chr12:3056260-3056417	Chr12:3078882-3079040	0	Chr12:3036533-3036690	0
ONG1200080	0	Chr12:3163906-3164328	Chr12:3194700-3195122	0	Chr12:3145485-3145907	0	0	0	Chr12:3151660-3152082	0	0	Chr12:3076172-3076594	Chr12:3204978-3205400	Chr12:3116354-3116776	Chr12:3170458-3170874	Chr12:3080214-3080636	0	0	0	0
ONG1200090	Chr12:4450373-4453309	Chr12:4515069-4518001	Chr12:4384632-4387564	Chr12:4475409-4478340	Chr12:4363515-4366447	Chr12:4414156-4417090	Chr12:4375268-4378203	Chr12:4382122-4385055	Chr12:4376940-4379875	Chr12:4323618-4326627	Chr12:4445473-4445722	Chr12:4456256-4459268	Chr12:4425003-4428010	Chr12:4510049-4513057	Chr12:4381749-4384681	Chr12:4301121-4304130	Chr12:4354577-4357586	Chr12:4238393-4241390	Chr12:4525810-4528743	Chr12:4555583-4558603
ONG1200100	0	0	0	0	0	0	0	0	0	Chr12:4381184-4381721	Chr12:4511063-4511599	Chr12:4513818-4514355	Chr12:4482580-4483117	Chr12:4567462-4567999	0	Chr12:4358537-4359074	0	0	0	0
ONG1200110	Chr12:4593080-4593154	Chr12:4657757-4657831	Chr12:4527312-4527386	Chr12:4629753-4629827	Chr12:4506070-4506144	Chr12:4556767-4556841	Chr12:4517889-4517963	Chr12:4524827-4524901	Chr12:4519695-4519769	Chr12:4479076-4479150	Chr12:4611514-4611588	Chr12:4609422-4609496	Chr12:4580684-4580758	Chr12:4663387-4663461	Chr12:4534065-4534139	Chr12:4446671-4446745	Chr12:4482614-4482688	Chr12:4368816-4368890	Chr12:4706335-4706409	0
ONG1200120	Chr12:4606642-4610475	Chr12:4671319-4675152	Chr12:4540874-4544707	Chr12:4643332-4647164	Chr12:4519632-4523464	Chr12:4570329-4574162	Chr12:4531451-4535284	Chr12:4538389-4542223	Chr12:4533257-4537090	Chr12:4492640-4496188	Chr12:4625093-4628926	Chr12:4622986-4626534	Chr12:4594244-4597792	Chr12:4676950-4680498	Chr12:4547632-4551466	Chr12:4460232-4463780	0	0	0	0
ONG1200130	Chr12:4690694-4691852	Chr12:4755450-4756608	Chr12:4625087-4626245	Chr12:4739256-4740415	Chr12:4603854-4605013	Chr12:4654392-4655550	Chr12:4615516-4616674	Chr12:4622444-4623603	Chr12:4617354-4618512	Chr12:4565786-4566947	Chr12:4721637-4722795	Chr12:4697685-4698846	Chr12:4668802-4669963	Chr12:4751514-4752675	Chr12:4622756-4623917	Chr12:4534740-4535901	Chr12:4558356-4559507	Chr12:4449622-4450714	Chr12:4784275-4785436	Chr12:4871462-4872623	Chr12:4974058-4975612
ONG1200140	Chr12:4760727-4760987	Chr12:4825477-4825737	Chr12:4695120-4695380	Chr12:4811222-4811482	Chr12:4673888-4674148	Chr12:4724424-4724684	Chr12:4685556-4685816	Chr12:4692475-4692735	Chr12:4687373-4687633	Chr12:4630806-4631034	Chr12:4793622-4793882	Chr12:4762674-4762902	Chr12:4733862-4734090	Chr12:4816563-4816791	0	Chr12:4599779-4600007	Chr12:4621716-4621975	Chr12:4512838-4513097	0	Chr12:4949167-4949395
ONG1200150	Chr12:5064046-5064391	Chr12:5123649-5123994	Chr12:4992915-4993260	Chr12:5107157-5107617	Chr12:4972049-4972393	Chr12:5022562-5022907	Chr12:4983697-4984042	Chr12:4990701-4991046	Chr12:4985551-4985896	Chr12:4950285-4950630	Chr12:5089811-5090268	Chr12:5070593-5070938	Chr12:5047345-5047690	Chr12:5124430-5124775	Chr12:4992278-4992623	Chr12:4908736-4909081	Chr12:4968849-4969200	Chr12:4858564-4858915	Chr12:5164609-5164954	Chr12:5290547-5290892
ONG1200160	0	0	0	0	0	0	0	0	0	Chr12:5444652-5494073	0	Chr12:5565442-5614888	Chr12:5535629-5585054	Chr12:5608911-5658338	Chr12:5477387-5526808	Chr12:5403733-5453129	0	0	0	0
ONG1200170	0	0	0	Chr12:5627378-5627487	0	0	0	0	0	0	Chr12:5644319-5644428	0	0	Chr12:5866197-5866397	0	Chr12:5697510-5697619	Chr12:5446383-5446582	0	0	Chr12:5717253-5717316
ONG1200180	Chr12:5761864-5761990	Chr12:5937851-5937977	Chr12:5798915-5799041	Chr12:6030508-6030632	Chr12:5574617-5574743	Chr12:5831062-5831188	Chr12:5792265-5792391	Chr12:5593284-5593410	Chr12:5793966-5794092	0	Chr12:5902012-5902136	0	0	Chr12:6210930-6211056	0	Chr12:6027849-6027973	Chr12:5620739-5620865	Chr12:5401073-5401199	Chr12:6091242-6091368	Chr12:5847566-5847692
ONG1200190	0	0	0	0	0	0	0	0	0	0	0	0	0	Chr12:6472518-6472728	0	0	0	0	0	0
ONG1200200	0	0	0	0	0	0	0	0	0	0	0	0	0	Chr12:6488674-6493676	0	0	0	0	0	0
ONG1200210	0	0	0	0	0	0	0	0	0	Chr12:5937881-5942914	Chr12:5982195-5982296	Chr12:6059271-6064304	Chr12:6029161-6034194	Chr12:6571882-6571964	Chr12:5970463-5975496	0	Chr12:5695169-5695251	Chr12:5476048-5476130	0	0
ONG1200220	0	0	0	0	0	0	0	0	0	Chr12:6007273-6007369	0	Chr12:6128662-6128758	Chr12:6098545-6098641	Chr12:6641006-6641102	Chr12:6039845-6039941	0	0	0	0	Chr7:15540858-15540954
ONG1200230	0	0	Chr12:6222563-6222869	0	0	0	0	0	0	0	0	0	0	Chr12:6964339-6964455	Chr12:6363380-6363496	0	0	0	0	0
ONG1200240	0	0	0	0	0	0	0	0	0	0	0	Chr12:6947661-6947975	Chr12:6918854-6919168	Chr12:7596164-7596478	Chr12:6996127-6996441	0	0	0	0	0
ONG1200250	Chr12:7399754-7399816	Chr12:7581816-7581878	Chr12:7432524-7432586	0	Chr12:7255038-7255100	Chr12:7499567-7499630	Chr12:7465098-7465161	Chr12:7329726-7329789	Chr12:7438128-7438190	Chr12:7282473-7282535	Chr12:7483952-7484014	0	Chr12:7364137-7364199	Chr12:8041352-8041414	0	Chr12:7634380-7634442	Chr12:7152001-7152063	Chr12:6918304-6918366	0	0
ONG1200260	Chr12:7711670-7711743	Chr12:7893892-7893965	Chr12:7755180-7755253	Chr12:8314746-8314819	Chr12:7567113-7567186	0	0	0	Chr12:7750209-7750282	0	0	Chr12:7962494-7962567	Chr12:7696623-7696696	Chr12:8355138-8355211	Chr12:8007731-8007804	0	0	0	0	0
ONG1200270	0	0	0	Chr12:8690598-8690740	0	0	0	0	0	0	0	Chr12:8364379-8364521	Chr12:8033098-8033240	Chr12:8691645-8691787	Chr12:8424641-8424783	0	0	0	0	0
ONG1200280	0	0	0	Chr12:8747736-8748030	0	0	0	0	0	0	0	Chr12:8407005-8407299,Chr12:8429415-8429709	Chr12:8080941-8081235	Chr12:8739615-8739909	Chr12:8467295-8467589,Chr12:8489696-8489990	0	0	0	0	0
ONG1200290	Chr12:8385564-8385776	Chr12:8591888-8592096	Chr12:8426694-8426903	Chr12:9274674-9274878	Chr12:8264276-8264480	0	Chr12:8342348-8342560	0	Chr12:8424200-8424410	0	Chr12:8408539-8408750	Chr12:8958944-8959150	Chr12:8606540-8606746	Chr12:9253419-9253625	Chr12:9022021-9022227	Chr12:8507117-8507327	Chr12:8167127-8167338	Chr12:7809877-7810089	Chr12:9119314-9119525	Chr12:8655254-8655468
ONG1200300	Chr12:8513234-8516939	Chr12:8698208-8698514	Chr12:8563680-8563986	Chr12:9387324-9387630	Chr12:8373397-8377100	Chr12:8567352-8571062	Chr12:8470017-8473722	Chr12:8390822-8391128	Chr12:8551841-8555546	Chr12:9111660-9115368	Chr12:8512664-8516277	Chr12:9068072-9071775	Chr12:8715640-8719343	Chr12:9362396-9366099	Chr12:9133811-9134117	Chr12:8667003-8667309	0	0	Chr12:9276160-9277382	Chr12:8910144-8910451
ONG1200310	0	0	0	Chr12:10118062-10118134	Chr12:8970410-8970482	0	0	0	0	0	0	0	Chr12:9309163-9309235	Chr12:9955022-9955094	0	0	0	Chr12:8348239-8348310	0	0
ONG1200320	0	0	0	0	0	0	0	0	0	0	0	0	0	Chr12:11087194-11090155	0	0	0	0	0	0
ONG1200330	Chr12:10388786-10388965	Chr12:10820595-10820774	Chr12:10453151-10453330	Chr12:11540418-11540597	Chr12:10117974-10118138	Chr12:10607762-10607941	Chr12:10362725-10362904	Chr12:10459806-10459985	Chr12:10427549-10427728	Chr12:10983383-10983562	Chr12:10302735-10302899	Chr12:10967228-10967392	Chr12:10614223-10614387	Chr12:11140804-11140983	Chr12:11143231-11143395	Chr12:10656087-10656266	Chr12:9750268-9750447	Chr12:9407083-9407262	Chr12:11135943-11136122	Chr12:10626431-10626610
ONG1200340	Chr12:10515903-10522253	Chr12:10973563-10980420	Chr12:10580501-10586850	Chr12:11679544-11686420	Chr12:10258238-10276922	0	Chr12:10489845-10496194	Chr12:10602728-10609580	Chr12:10554678-10561026	Chr12:11123816-11130685	Chr12:10443019-10461701	Chr12:11107495-11126183	Chr12:10754505-10773192	Chr12:11282791-11289656	Chr12:11289187-11307873	Chr12:10796586-10803457	0	0	0	0
ONG1200350	Chr12:10642652-10648110	Chr12:11122495-11140630	Chr12:10707466-10712927	Chr12:11816027-11821403	Chr12:10403794-10409266	Chr12:10868876-10874396	Chr12:10616520-10621993	Chr12:10757172-10765830	Chr12:10681387-10686843	Chr12:11260645-11266116	Chr12:10588324-10593746	Chr12:11253067-11258538	Chr12:10900058-10905529	Chr12:11409052-11414526	Chr12:11434739-11440210	Chr12:10933423-10938894	Chr12:10117786-10123277	Chr12:9672464-9677957	Chr12:11413846-11422491	Chr12:10886702-10892199
ONG1200360	Chr12:10940560-10940745	Chr12:11369142-11369327	Chr12:11004782-11004967	Chr12:12027720-12027905	Chr12:10562867-10563052	Chr12:11287977-11288204	Chr12:10914488-10914673	Chr12:11004760-11004945	Chr12:10979350-10979535	Chr12:11491558-11491743	Chr12:10738884-10739069	Chr12:11425731-11425916	Chr12:11059133-11059318	Chr12:11727525-11727710	Chr12:11598242-11598427	Chr12:11155403-11155588	Chr12:10307096-10307281,Chr12:10697466-10697693	Chr12:9815236-9815421	Chr12:11616090-11616275	Chr12:11093743-11093928
ONG1200370	Chr12:11734061-11734229	Chr12:12149188-12149356	Chr12:11757768-11757936	Chr12:12839601-12839769	Chr12:11365172-11365340	0	Chr12:11706435-11706603	Chr12:11893355-11893523	Chr12:11772060-11772228	Chr12:12305507-12305675	Chr12:11562175-11562343	Chr12:12255045-12255213	Chr12:11851579-11851747	Chr12:12351307-12351475	Chr12:12468906-12469074	Chr12:11952347-11952515	Chr12:11232266-11232434	Chr12:10535668-10535836	Chr12:12295106-12295274	Chr12:11592751-11592919
ONG1200380	Chr12:11757738-11757946	Chr12:12187117-12187325	Chr12:11781444-11781652	Chr12:12863286-12863494	Chr12:11388680-11388888	0	Chr12:11730111-11730319	Chr12:11923522-11923730	Chr12:11795725-11795933	Chr12:12329193-12329401	Chr12:11585683-11585891	Chr12:12278495-12278703	Chr12:11875029-11875237	Chr12:12374928-12375136	Chr12:12492415-12492623	Chr12:11975996-11976204	0	0	0	0
ONG1200390	Chr12:12306066-12306172	Chr12:12679740-12679846	Chr12:12329453-12329559	Chr12:13396911-13397017	Chr12:11893787-11893893	Chr12:12422651-12422757	Chr12:12256729-12256835	Chr12:12380313-12380419	Chr12:12344108-12344214	Chr12:12838615-12838721	Chr12:12126125-12126231	Chr12:12807057-12807163	Chr12:12384389-12384495	Chr12:12773733-12773839	Chr12:13001813-13001919	Chr12:12501211-12501317	Chr12:11624380-11624486	Chr12:10927754-10927860	Chr12:12737741-12737847	Chr12:11987567-11987673
ONG1200400	0	0	0	0	0	0	0	0	0	0	0	0	0	Chr12:13051238-13053522	0	0	0	0	0	0
ONG1200410	0	0	0	0	0	0	0	0	0	0	0	0	0	Chr12:13322553-13322790	0	0	0	0	0	0
ONG1200420	0	0	0	0	0	0	0	0	0	0	0	0	0	Chr12:14771506-14773732	Chr12:15243833-15246059	0	0	0	0	0
ONG1200430	0	0	0	0	0	0	0	0	0	0	0	0	0	Chr12:14982441-14982606	Chr12:15454732-15454897	0	0	0	0	0
ONG1200440	0	0	0	0	0	0	0	0	0	Chr12:16279104-16279176	0	0	0	Chr12:16062701-16062773	Chr12:16536108-16536180	0	0	0	0	0
ONG1200450	Chr12:16532168-16532760	Chr12:17068434-17069026	Chr12:16595413-16596007	0	Chr12:16197486-16198095	Chr12:16207764-16208376	Chr12:16079951-16080561	Chr12:16991542-16992147	Chr12:16469406-16469998	Chr12:16763210-16763819	0	Chr12:17446149-17446758	0	Chr12:16612301-16612911,12:16636270-16636880	Chr12:17345284-17345894	0	Chr12:15240592-15241201	0	0	0
ONG1200460	0	0	0	0	0	0	0	0	0	0	0	0	0	Chr12:16861828-16861961	0	0	0	0	0	0
ONG1200470	Chr12:16940776-16941612	Chr12:17477041-17477877	Chr12:17002021-17002857	Chr12:17841509-17842367	Chr12:16713376-16714155	Chr12:16650092-16650950	Chr12:16522301-16523159	Chr12:17517778-17518636	Chr12:16878091-16878927	Chr12:17104885-17105721	Chr12:16517332-16518189	Chr12:17965801-17966568	Chr12:17287833-17288687	Chr12:17346813-17347649	Chr12:17800223-17801077	Chr12:17062966-17063823	Chr12:15533038-15533894	Chr12:14984279-14985136	Chr12:17150605-17151464	Chr12:16307239-16308097
ONG1200480	Chr12:17010238-17010364,Chr12:16955097-16955225,Chr12:16973101-16973229,Chr12:16991087-16991215	Chr12:17546453-17546579,Chr12:17491340-17491468,Chr12:17509325-17509453,Chr12:17527306-17527434	Chr12:17053510-17053636,Chr12:17016333-17016461,Chr12:17034353-17034481	Chr12:17862149-17862280	Chr12:16728487-16728618	Chr12:16663247-16663378	Chr12:16535454-16535585	Chr12:17530941-17531072	Chr12:16911555-16911681,Chr12:16892400-16892528	Chr12:17120857-17120988	Chr12:16502001-16502132	Chr12:17980899-17981030	Chr12:17300974-17301105	Chr12:17362280-17362411	Chr12:17813373-17813504	Chr12:17076200-17076331	Chr12:15546211-15546342	Chr12:14997462-14997593	Chr12:17163788-17163919	Chr12:16320401-16320532
ONG1200490	Chr12:17607007-17607135	Chr12:18143203-18143331	Chr12:17764009-17764137	Chr12:18592651-18592779	Chr12:17236843-17236971	Chr12:17184011-17184139	Chr12:17056202-17056330	Chr12:18221497-18221625	Chr12:17647315-17647443	Chr12:17822985-17823113	Chr12:17145762-17145890	Chr12:18483903-18484031	Chr12:17824205-17824333	Chr12:17986303-17986431	Chr12:18350564-18350692	Chr12:17726968-17727096	Chr12:16034102-16034238	Chr12:15654088-15654216	Chr12:17751080-17751208	Chr12:16884999-16885127
ONG1200500	Chr12:17877062-17877536	Chr12:18335970-18336444	Chr12:17982799-17983276	Chr12:18880806-18881277	Chr12:17488123-17488597	Chr12:17376761-17377235	Chr12:17248952-17249426	Chr12:18511140-18511614	Chr12:17949494-17949968	Chr12:18031708-18032182	Chr12:17355827-17356301	Chr12:18704459-18704936	Chr12:18044746-18045223	Chr12:18287170-18287644	Chr12:18571123-18571600	Chr12:17947569-17948043	Chr12:16703142-16703613	Chr12:16486072-16486546	Chr12:17977592-17978066	Chr12:17092274-17092748
ONG1200510	0	0	0	0	0	0	0	0	0	0	0	0	0	Chr12:18612641-18613010	0	0	Chr12:17003161-17003333	Chr12:16785227-16785753	Chr12:18593054-18593580	Chr12:17409506-17409865
ONG1200520	0	0	Chr12:18796063-18796655	0	0	0	0	0	0	0	0	Chr12:19522410-19523002	Chr12:18868333-18868925	Chr12:19193193-19193785	Chr12:19389658-19390250	Chr12:18765929-18766521	0	Chr12:17368115-17368706	Chr12:19306693-19307286	0
ONG1200530	Chr12:18860221-18862674	Chr12:19085801-19088254	Chr12:18893184-18895639	Chr12:19703063-19705534	0	0	0	Chr12:19329191-19331639	Chr12:18902875-18905328	Chr12:19041139-19043590	Chr12:18361120-18363585	Chr12:19618937-19621392	Chr12:18964891-18967346	Chr12:19290459-19292914	Chr12:19486196-19488651	Chr12:18862613-18865068	0	0	Chr12:19442767-19445214	0
ONG1200540	Chr12:19340457-19340634	Chr12:19566260-19566437	Chr12:19345333-19345515	Chr12:20147135-20147278	0	0	0	0	Chr12:19378807-19378984	Chr12:19533433-19533610	Chr12:18851326-18851503	Chr12:20068869-20069052	Chr12:19414640-19414824	Chr12:19743621-19743803	Chr12:19935970-19936153	Chr12:19316984-19317166	0	0	0	Chr12:18700506-18700682
ONG1200550	0	0	0	0	0	0	0	0	0	0	0	0	0	Chr12:20372436-20372567	Chr12:20565760-20565891	0	Chr12:18633471-18633602	Chr12:18185389-18185520	0	Chr12:19321457-19321590
ONG1200560	0	0	0	0	0	0	0	0	0	0	0	0	0	Chr12:20925176-20929627	Chr12:21335726-21340177	0	0	0	0	0
ONG1200570	Chr12:20012940-20013039	0	Chr12:20002942-20003041	Chr12:20826216-20826315	Chr12:19262440-19262539	0	Chr12:19049621-19049720	Chr12:20504124-20504223	Chr12:20128381-20128480	Chr12:20278932-20279031	Chr12:19570405-19570504	Chr12:20720275-20720374	0	Chr12:20942459-20942559	Chr12:21352412-21352512	0	0	0	0	0
ONG1200580	0	0	Chr12:20109914-20109976	Chr12:20933934-20933996	Chr12:19370162-19370224	0	Chr12:19157311-19157373	Chr12:20611859-20611921	0	0	0	Chr12:20827916-20827978	Chr12:20067912-20067974	Chr12:21046661-21046723	Chr12:21454787-21454849	Chr12:19951521-19951583	0	0	Chr12:20740829-20740891	0
ONG1200590	Chr12:20271052-20271566	Chr12:20523033-20523547	Chr12:20450720-20451234	Chr12:21282690-21283204	Chr12:19712974-19713488	Chr12:19428898-19429412	Chr12:19458121-19458635	Chr12:20952774-20953288	Chr12:20386546-20387060	Chr12:20559868-20560382	Chr12:19853044-19853558	Chr12:21169450-21169964	Chr12:20376430-20376944	Chr12:21349126-21349640	Chr12:21770615-21771129	Chr12:20292646-20293160	Chr12:19183374-19183888	Chr12:18725413-18725927	Chr12:21127382-21127920	0
ONG1200600	Chr12:20407163-20413530	Chr12:20647345-20653807	Chr12:20714723-20721197	Chr12:21503452-21509901	Chr12:19977150-19983625	Chr12:19693093-19699567	Chr12:19622284-19628731	Chr12:21216936-21223411	Chr12:20510721-20517183	Chr12:20684130-20690595	Chr12:19990200-19996663	Chr12:21396587-21403061	Chr12:20657565-20664039	Chr12:21599999-21606498	Chr12:22044659-22051133	Chr12:20546108-20552582	Chr12:19390191-19396660	Chr12:18933933-18940243	Chr12:21238878-21282378	Chr12:19921104-19927605
ONG1200610	Chr12:20737299-20738030	Chr12:20977139-20977870	0	0	Chr12:20379491-20380106	Chr12:20089735-20090350	0	0	0	Chr12:21052966-21053581	0	Chr12:21756918-21757533	Chr12:21019204-21019819	Chr12:21960021-21960636	Chr12:22408855-22409470	Chr12:20910574-20911189	Chr12:19740422-19741153	Chr12:19256207-19256938	Chr12:21649143-21649874	0
ONG1200620	0	0	0	0	0	0	0	0	0	0	0	Chr12:22120369-22120519	0	Chr12:22342654-22342804	0	0	0	0	0	0
ONG1200630	0	0	0	0	Chr12:20957251-20958610	0	0	0	0	0	0	Chr12:22271338-22272696	Chr12:21556606-21557964	Chr12:22493545-22494903	Chr12:22945927-22947285	Chr12:21454644-21456002	0	0	0	0
ONG1200640	0	0	0	0	0	0	0	0	0	Chr12:21688775-21688870	Chr12:20920285-20920380	Chr12:22481039-22481134	Chr12:21765316-21765411	Chr12:22701789-22701884	Chr12:23154610-23154705	Chr12:21669863-21669958	0	0	0	0
ONG1200650	0	0	0	0	0	0	Chr12:21237207-21237383	Chr12:22928344-22928520	0	Chr12:22413555-22413731	Chr12:21596927-21597103	Chr12:23203146-23203322	Chr12:22486629-22486805	Chr12:23433449-23433625	Chr12:23871730-23871906	Chr12:22405508-22405684	Chr12:21143668-21143844	Chr12:20721929-20722105	Chr12:22874991-22875153	Chr12:21481588-21481764
ONG1200660	Chr12:22273796-22273956	Chr12:22707656-22707816	Chr12:22635599-22635759	Chr12:23273725-23273885	Chr12:22087671-22087831	Chr12:21874793-21874953	Chr12:21384352-21384804	Chr12:23060280-23060440	Chr12:22360608-22360768	Chr12:22547214-22547374	Chr12:21729500-21729660	Chr12:23339058-23339505	Chr12:22622639-22623090	Chr12:23569404-23569851	Chr12:24008928-24009379	Chr12:22560144-22560543	Chr12:21275765-21276218	Chr12:20853542-20853995	Chr12:23198481-23198934	Chr12:21624775-21625235
ONG1200670	Chr12:22597039-22597977	Chr12:23030871-23031809	Chr12:22912431-22913352	Chr12:23551575-23552523	Chr12:22415466-22416405	Chr12:22153399-22154336	Chr12:21704322-21705262	Chr12:23338332-23339271	Chr12:22683742-22684680	Chr12:22821171-22822110	Chr12:22002848-22003784	Chr12:23685375-23686313	Chr12:22905883-22906821	Chr12:23870129-23871067	Chr12:24269686-24270624	Chr12:22874878-22875816	Chr12:21525670-21526586	Chr12:21101057-21101995	Chr12:23476786-23477725	Chr12:21875153-21876084
ONG1200680	Chr12:22732363-22732746	Chr12:23166167-23166550	Chr12:23046905-23047289	Chr12:23699770-23700153	Chr12:22575584-22575967	Chr12:22346308-22346691	Chr12:21852935-21853319	Chr12:23469827-23470210	Chr12:22819060-22819443	Chr12:22952043-22952426	Chr12:22133416-22133799	Chr12:23845288-23845671	Chr12:23066021-23066404	Chr12:24029598-24029981	Chr12:24430466-24430849	Chr12:23034508-23034891	Chr12:21664633-21665016	Chr12:21239907-21240290	Chr12:23620379-23635139	0
ONG1200690	Chr12:23199360-23199457	Chr12:23653327-23653424	Chr12:23545638-23545735	Chr12:24150352-24150449	Chr12:23062746-23062843	Chr12:22814440-22814537	Chr12:22362177-22362274	0	Chr12:23304056-23304153	0	0	Chr12:24333845-24333942	Chr12:23548798-23548895	Chr12:24503280-24503377	Chr12:24913284-24913381	Chr12:23517379-23517476	Chr12:22092138-22092235	Chr12:21661120-21661217	0	0
ONG1200700	Chr12:23271106-23271473	Chr12:23725019-23725386	Chr12:23616811-23617178	Chr12:24222114-24222481	Chr12:23134515-23134882	Chr12:22885755-22886122	Chr12:22433987-22434351	Chr12:24014999-24015366	Chr12:23375334-23375701	Chr12:23427305-23427672	Chr12:22609013-22609380	Chr12:24425419-24425786	Chr12:23631488-23631855	Chr12:24600455-24600822	Chr12:25005117-25005484	Chr12:23599991-23600358	Chr12:22166757-22167125	Chr12:21785555-21785923	Chr12:24390635-24391003	0
ONG1200710	Chr12:23359022-23361610	Chr12:23812879-23815467	Chr12:23704686-23707274	Chr12:24309900-24312491	Chr12:23222640-23225231	Chr12:22986846-22989432	Chr12:22535072-22537658	Chr12:24102954-24105545	Chr12:23463236-23465825	Chr12:23516993-23519579	Chr12:22698513-22701100	Chr12:24514305-24516894	Chr12:23720446-23723034	Chr12:24681414-24684003	Chr12:25086060-25088652	Chr12:23680780-23683369	Chr12:22243725-22246235	Chr12:21706240-21708830	0	Chr12:23002622-23005210
ONG1200720	Chr12:24872166-24872231	Chr12:25358754-25358819	Chr12:25185348-25185413	Chr12:25815984-25816049	Chr12:24748591-24748656	Chr12:24511652-24511717	Chr12:24048875-24048940	Chr12:25541242-25541307	Chr12:25039335-25039400	Chr12:24898692-24898757	Chr12:24136179-24136244	Chr12:25971245-25971310	Chr12:25180066-25180131	Chr12:26030222-26030287	Chr12:26514563-26514628	Chr12:25102344-25102409	0	0	0	0
ONG1200730	Chr12:25258554-25258849	Chr12:25745055-25745350	Chr12:25573584-25573879	Chr12:26201121-26201416	0	Chr12:24898009-24898304	Chr12:24441787-24442082	Chr12:25966851-25967159	Chr12:25428230-25428536	Chr12:25287002-25287308	Chr12:24523223-24523529	Chr12:26355087-26355382	Chr12:25563461-25563756	Chr12:26412437-26412732	Chr12:26897377-26897672	Chr12:25485121-25485416	Chr12:23858471-23858700	Chr12:23553645-23553952	Chr12:26322925-26323232	Chr12:25030015-25030323
ONG1002280	0	0	0	0	0	Chr10:4807611-4808805	0	Chr10:4898473-4899667	0	Chr10:4580615-4581809	Chr10:4664752-4665946	0	0	ChrAC160949:55605-56799	0	0	0	0	0	0
ONG0600750	Chr6:6031882-6032066	Chr6:5667962-5668146	WGGU01000216.1:45305-45489,Chr6:5874880-5875064	Chr6:5835046-5835230	Chr6:5674261-5674445	Chr6:5689319-5689503	Chr6:6407880-6408064	Chr6:5731570-5731754	Chr6:5739657-5739841	Chr6:5827901-5828085	Chr6:5979789-5979973	Chr6:6103062-6103246	Chr6:5870106-5870290	Chr6:5894180-5894364	Chr6:5932477-5932661	Chr6:5892822-5893006	0	0	0	Chr6:5900135-5900319
ONG0600760	0	Chr6:9129663-9129802	WGGU01000223.1:413075-413214	Chr6:9390264-9390403	Chr6:9108497-9108636	Chr6:9170676-9170815	0	Chr6:9002904-9003043	0	0	0	0	0	Chr6:9281967-9282106	0	0	0	0	0	0
ONG0800680	Chr8:19409942-19409992	Chr8:19432931-19432981	WGGU01000332.1:302302-302352	Chr8:19923760-19923810	Chr8:20585182-20585232	Chr8:20176919-20176969	Chr8:20367780-20367830	Chr8:20397994-20398044	Chr8:19887631-19887681	Chr8:19941562-19941612	Chr8:20316725-20316775	0	Chr8:19905391-19905441	Chr8:18816654-18816704	0	Chr8:19783720-19783770	0	0	0	0
ONG1100790	Chr11:6461757-6461862	Chr11:6171824-6171929	WGGU01000474.1:202284-202389	Chr11:6327250-6327355	Chr11:6230174-6230279	Chr11:6202654-6202759	Chr11:6185807-6185912	Chr11:6648017-6648122	Chr11:6229871-6229976	Chr11:6539462-6539554	Chr11:6267052-6267157	Chr11:6189580-6189685	Chr11:6318360-6318465	Chr11:6090030-6090135	Chr11:5987231-5987336	Chr11:6032796-6032901	Chr11:6046242-6046347	Chr11:6277906-6278011	Chr11:6632218-6632323	Chr11:6365431-6365524
ONG0500630	Chr5:29364263-29364320	Chr5:29362815-29362872	Chr5:29179880-29179937	Chr5:28997378-28997435	Chr5:29382844-29382901	Chr5:29154741-29154798	Chr5:29291623-29291680	Chr5:28965932-28965989	Chr5:29110867-29110924	Chr5:29210854-29210911	Chr5:29207831-29207888	Chr5:29298095-29298152	Chr5:28754890-28754947	0	Chr5:28728287-28728344	Chr5:28880577-28880634	0	0	Chr5:28705150-28705207	0
ONG0600780	Chr6:4576458-4576666	Chr6:4242663-4242871	Chr6:4360606-4360814,WGGU01000210.1:45826-46034	Chr6:4344853-4345061	Chr6:4265108-4265316	Chr6:4281426-4281634	Chr6:5053039-5053247	Chr6:4266029-4266237	Chr6:4301735-4301943	Chr6:4331072-4331280	Chr6:4500459-4500667	Chr6:4584651-4584859	Chr6:4436481-4436689	0	Chr6:4416841-4417049	Chr6:4486448-4486656	0	0	0	0
ONG1200780	Chr12:18190525-18191109	Chr12:18555666-18556250	Chr12:18268343-18268817	Chr12:19178409-19178993	Chr12:17708077-17708661	Chr12:17596827-17597411	Chr12:17469028-17469612	Chr12:18775080-18775664	Chr12:18262960-18263544	Chr12:18340824-18341408	Chr12:17663112-17663696	Chr12:18988359-18988833	Chr12:18328562-18329036	0	Chr12:18854891-18855365	Chr12:18231558-18232032	Chr12:17020397-17020982	Chr12:16802688-16803273	Chr12:18577325-18577800	0
ONG0500640	Chr5:29456696-29457081	Chr5:29455284-29455670	Chr5:29274400-29274785	Chr5:29089823-29090208	Chr5:29475298-29475683	Chr5:29249095-29249480	Chr5:29386871-29387257	Chr5:29060435-29060820	Chr5:29206100-29206486	Chr5:29329206-29329592	Chr5:29307033-29307418	Chr5:29392599-29392984	Chr5:28860667-28861052	0	Chr5:28823461-28823847	0	0	0	0	0
ONG1000580	Chr10:4759471-4760070	Chr10:4887905-4888508	Chr10:20708843-20709442	Chr10:4856033-4856632	Chr10:4905786-4906383	Chr10:4881554-4882153	Chr10:4776494-4777093	Chr10:4972424-4973023	Chr10:4908606-4909205	Chr10:4654564-4655163	0	Chr10:4545752-4546351	Chr10:4500099-4500698	0	Chr10:4081537-4082136	Chr10:4567994-4568593	0	0	0	0
ONG0800700	0	Chr8:16279467-16279568	Chr8:18175887-18175988,WGGU01000324.1:18963-19064	0	Chr8:17322136-17322237	Chr8:16914717-16914818	Chr8:17149277-17149378	Chr8:17617395-17617496	Chr8:16836470-16836571	Chr8:17054702-17054803	0	0	Chr8:17117592-17117693	0	Chr8:15855658-15855759	0	Chr8:13856168-13856269	Chr8:13706352-13706453	Chr8:15434809-15434910	0
ONG0301010	Chr3:1528965-1529065	Chr3:1548475-1548575	Chr3:1533913-1534013	Chr3:1510271-1510371	Chr3:1529947-1530047	Chr3:1536842-1536942	Chr3:1493393-1493493	Chr3:1472932-1473032	Chr3:1525879-1525979	Chr3:1531233-1531333	Chr3:1474813-1474913	Chr3:1532562-1532662	0	0	Chr3:1536794-1536894	Chr3:1511638-1511738	Chr3:1390466-1390566	Chr3:1323536-1323636	0	0
ONG0800710	Chr8:11289182-11291988	Chr8:11384251-11387075	Chr8:13085760-13088582	Chr8:11967930-11970756	Chr8:12254753-12257549	Chr8:11853854-11856679	Chr8:12093543-12096366	Chr8:11865887-11868683	Chr8:11757034-11759852	Chr8:12072339-12075162	Chr8:12326707-12329503	Chr8:11937863-11940668	0	0	Chr8:11987004-11989805	Chr8:12562733-12565538	0	0	0	0
ONG0101240	Chr1:24026632-24026735	Chr1:24218707-24218810	Chr1:24274689-24274792	Chr1:24161850-24161953	Chr1:24567490-24567593	Chr1:23869524-23869627	Chr1:24204030-24204133	Chr1:24262430-24262533	Chr1:23836379-23836482	Chr1:22473315-22473418	Chr1:23315467-23315570	0	0	0	Chr1:23919313-23919416	Chr1:23088121-23088224	Chr1:20658524-20658627	Chr1:21501272-21501375	0	Chr1:22739474-22739576
ONG0800720	Chr8:7770279-7770440	Chr8:7816281-7816442	Chr8:9457345-9457506	Chr8:8264755-8264916	Chr8:8783196-8783355	Chr8:8473482-8473643	Chr8:8653089-8653248	Chr8:8322366-8322527	Chr8:8076699-8076860	Chr8:8675287-8675448	Chr8:8731785-8731946	Chr8:8184525-8184686	0	0	Chr8:8210614-8210775	0	Chr8:6657947-6658108	Chr8:6698083-6698244	Chr8:7231080-7231241	0
ONG0800730	0	Chr8:11484397-11484477	Chr8:13185919-13185999	Chr8:12052155-12052227	Chr8:12354889-12354969	Chr8:11954021-11954101	Chr8:12193703-12193783	Chr8:11966053-11966133	Chr8:11854082-11854162	Chr8:12172485-12172565	Chr8:12411368-12411443	Chr8:12661178-12661258	0	0	Chr8:12714550-12714630	Chr8:13286333-13286413	0	0	Chr8:10878906-10878992	0
ONG1100810	Chr11:26180035-26180131	Chr11:27041174-27041270	Chr11:27338510-27338606	Chr11:26176487-26176583	Chr11:27435905-27436001	Chr11:26707370-26707466	Chr11:26349286-26349382	Chr11:27308677-27308773	Chr11:26979293-26979389	0	0	0	0	0	Chr11:23822219-23822315	Chr11:23741032-23741128	0	0	0	0
ONG0900560	Chr9:9981507-9981596	Chr9:9852331-9852420	Chr9:9973595-9973684	Chr9:9950513-9950602	Chr9:10543124-10543213	Chr9:10370362-10370451	Chr9:10811913-10812002	Chr9:8890866-8890955	Chr9:9970103-9970192	0	0	0	0	0	Chr9:9546594-9546683	0	Chr9:8347401-8347490	Chr9:8166320-8166409	Chr9:9582054-9582143	0
ONG0600790	Chr6:13490772-13491409	Chr6:13137119-13137757	Chr6:13112214-13112852,WGGU01000232.1:79930-80568	Chr6:13757901-13758540	Chr6:13040253-13040892	Chr6:13098743-13099381	Chr6:13270405-13271043	Chr6:12959996-12960635	Chr6:13267314-13267952	Chr6:13017857-13018495	Chr6:13117757-13118396	0	Chr6:12724644-12725283	0	0	Chr6:13073826-13074464	0	0	0	0
ONG0600800	Chr6:17123374-17123454	Chr6:16750667-16750747	Chr6:16775660-16775740,WGGU01000243.1:474808-474888,WGGU01000244.1:27783-27863	Chr6:17412950-17413030	Chr6:16647348-16647428	Chr6:16657003-16657083	Chr6:16828230-16828310	Chr6:16515188-16515268	Chr6:16901820-16901900	Chr6:16258151-16258231	Chr6:16691230-16691310	0	Chr6:16274032-16274112	0	0	Chr6:16604476-16604556	0	0	0	0
ONG0600810	Chr6:17953217-17953273	Chr6:17559706-17559762	Chr6:17632276-17632332	Chr6:18226921-18226977	Chr6:17452337-17452393	Chr6:17655260-17655316	Chr6:17825469-17825525	Chr6:17513659-17513715	Chr6:17748507-17748563	Chr6:17119162-17119218	Chr6:17494434-17494490	0	Chr6:16940399-16940455	0	0	Chr6:17598148-17598204	0	0	0	0
ONG0700690	Chr7:20353531-20353724	Chr7:20001457-20001650	Chr7:19511040-19511233	Chr7:20317240-20317433	Chr7:20679738-20679931	Chr7:20522581-20522774	Chr7:20894301-20894494	Chr7:21106192-21106385	Chr7:20218980-20219173	Chr7:19507804-19507997	Chr7:19003381-19003574	Chr7:19244278-19244471	Chr7:20189445-20189636	0	0	Chr7:19408983-19409176	Chr7:17466686-17466879	Chr7:18123451-18123643	Chr7:19192973-19193166	0
ONG1100820	Chr11:9214806-9215041	Chr11:9513116-9513351	Chr11:9234749-9234983,WGGU01000487.1:22978-23213,WGGU01000507.1:125401-125636	Chr11:9326648-9326842	Chr11:9435421-9435657	Chr11:9408053-9408288	Chr11:9079064-9079299	Chr11:9388575-9388810	Chr11:9218071-9218306	Chr11:9397517-9397752	Chr11:9190714-9190949	Chr11:9091947-9092182	Chr11:9102418-9102653	0	0	Chr11:8824457-8824692	Chr11:8597694-8597929	Chr11:8730549-8730784	Chr11:9820642-9820876	Chr11:9510664-9510901
ONG1200790	Chr12:14485448-14485527	Chr12:14743373-14743452	Chr12:14596449-14596528	Chr12:15586098-15586177	Chr12:14255782-14255861	Chr12:14394942-14395021	Chr12:14339767-14339846	Chr12:14698281-14698360	Chr12:14523445-14523524	Chr12:15103426-15103505	Chr12:14485800-14485879	Chr12:15163823-15163902	Chr12:14750580-14750659	0	0	Chr12:14714632-14714711	0	0	Chr12:14822595-14822674	0
ONG0600820	Chr6:15627835-15627956	Chr6:15275054-15275175	Chr6:15195841-15195962,WGGU01000239.1:307173-307294	Chr6:15893250-15893371	Chr6:15177167-15177288	Chr6:15160003-15160124	Chr6:15331032-15331153	Chr6:15021540-15021661	Chr6:15411697-15411818	Chr6:14730344-14730465	Chr6:15212208-15212329	0	Chr6:14793798-14793919	0	0	Chr6:15134837-15134958	Chr6:14699363-14699484	Chr6:14085734-14085853	Chr6:15370652-15370773	0
ONG0200910	Chr2:19239862-19239979	Chr2:19334665-19334782	Chr2:19100739-19100856	Chr2:18817456-18817573	Chr2:19316903-19317020	Chr2:19479543-19479660	Chr2:18850231-18850348	Chr2:19003490-19003607	Chr2:18912876-18912993	Chr2:18692312-18692429	Chr2:19437602-19437719	Chr2:18331935-18332052	Chr2:18120555-18120672	0	0	0	0	0	0	0
ONG1100830	Chr11:6231070-6231125	Chr11:5906640-5906695	Chr11:6291071-6291126	Chr11:6061831-6061886	Chr11:5964725-5964780	Chr11:5937229-5937284	Chr11:5920372-5920427	Chr11:6382493-6382548	Chr11:6021267-6021322	Chr11:6299935-6299995	Chr11:6021475-6021535	0	Chr11:6072815-6072870	0	0	0	0	0	Chr11:6369522-6369582	0
ONG1100840	Chr11:15430196-15430255	Chr11:16192297-16192356	WGGU01000518.1:140351-140410	Chr11:15816347-15816406	Chr11:16593272-16593331	Chr11:16249642-16249701	Chr11:15438857-15438916	Chr11:16467624-16467683	Chr11:15768998-15769057	Chr11:15334729-15334788	Chr11:15542250-15542309	0	Chr11:14556169-14556228	0	0	0	0	0	0	0
ONG1200800	Chr12:13547326-13547525	0	Chr12:13563529-13563728	0	Chr12:13021176-13021368	Chr12:13413173-13413372	Chr12:13263556-13263755	Chr12:13633541-13633740	Chr12:13585463-13585662	0	Chr12:13257115-13257307	Chr12:13928723-13928915	Chr12:13511910-13512102	0	0	0	0	0	0	0
ONG0500650	Chr5:21035891-21036122	Chr5:21106720-21106951	Chr5:20900619-20900850	Chr5:20775170-20775401	Chr5:21086691-21086922	Chr5:20923158-20923389	Chr5:21178485-21178716	Chr5:20759641-20759872	Chr5:20831440-20831671	Chr5:20989848-20990079	Chr5:20924706-20924937	Chr5:20991012-20991243	Chr5:20499359-20499590	0	0	0	Chr5:17415447-17415678	Chr5:17206171-17206402	Chr5:19708781-19709008	0
ONG0800740	0	Chr8:16650857-16651074	Chr8:18478828-18479062,WGGU01000317.1:109304-109519	Chr8:17512666-17512900	Chr8:17684503-17684720	Chr8:17276928-17277145	Chr8:17520538-17520755	Chr8:17988999-17989216	Chr8:17207757-17207974	Chr8:17426140-17426357	Chr8:17828536-17828770	0	Chr8:17468409-17468626	0	0	0	0	0	Chr8:15768785-15769019	Chr8:14067639-14067872
ONG1200810	Chr12:3855777-3860242	Chr12:3979649-3981098	Chr12:3977121-3978570	Chr12:4014118-4015567	Chr12:3941381-3955567	Chr12:4006613-4008062	Chr12:3967678-3969127	Chr12:3977473-3978926	Chr12:3963419-3964868	Chr12:3933141-3934590	Chr12:4036477-4037926	0	Chr12:4036388-4037837	0	0	0	0	0	0	0
ONG0600830	Chr6:16338028-16338216	Chr6:15965096-15965284	Chr6:15985338-15985526,WGGU01000242.1:49230-49418	Chr6:16618656-16618844	Chr6:15888682-15888870	Chr6:15889950-15890138,Chr6:15909276-15909464	Chr6:16061095-16061283,Chr6:16080424-16080612	Chr6:15748087-15748275	Chr6:16105492-16105680	Chr6:15512478-15512666	Chr6:15900876-15901064	0	Chr6:15563658-15563846	0	0	Chr6:15858810-15858998	Chr6:15696584-15696767	Chr6:15117115-15117303	Chr6:16358087-16358275	0
ONG0500660	Chr5:21357826-21357977	Chr5:21428719-21428870	Chr5:21222223-21222374	Chr5:21097166-21097317	Chr5:21408727-21408878	Chr5:21245343-21245494	Chr5:21500323-21500474	Chr5:21081503-21081654	Chr5:21153405-21153556	0	0	Chr5:21363273-21363424	Chr5:20871610-20871761	0	0	0	0	0	Chr5:20005094-20005245	0
ONG0101250	Chr1:20116646-20116775	Chr1:20296789-20296918	Chr1:19913795-19913924	Chr1:20311169-20311298	Chr1:20263502-20263631	Chr1:19662260-19662389	Chr1:20321211-20321340	Chr1:20252508-20252637	Chr1:20141676-20141805	0	0	0	Chr1:18845903-18846032	0	0	0	Chr1:17429973-17430102	0	0	0
ONG1100850	Chr11:3097676-3097754	Chr11:3186064-3186142	0	Chr11:3243217-3243295	Chr11:3154778-3154856	Chr11:3127934-3128012	Chr11:3111690-3111768	0	Chr11:3187923-3188001	0	0	0	Chr11:3210866-3210944	0	0	0	Chr11:2945943-2946021	0	Chr11:3236863-3236941	Chr11:3139985-3140063
ONG0101260	Chr1:3182338-3182779	0	Chr1:3235228-3235669	Chr1:3241168-3241616	Chr1:3252660-3253108	Chr1:3268487-3268928	Chr1:3150422-3150863	Chr1:3173850-3174298	Chr1:3206933-3207374	0	0	0	Chr1:3190366-3190807	0	0	Chr1:3138298-3138739	0	0	0	0
ONG0301020	Chr3:5929953-5930020	Chr3:5903587-5903654	Chr3:5865919-5865986	Chr3:5869215-5869282	Chr3:5906768-5906835	Chr3:5929170-5929237	Chr3:5896048-5896115	Chr3:5856632-5856699	Chr3:5998456-5998523	Chr3:5937122-5937189	Chr3:5901315-5901382	0	0	0	0	Chr3:5979633-5979700	0	0	Chr3:6133538-6133605	0
ONG1000590	Chr10:17589817-17589945	Chr10:17607973-17608101	Chr10:7847135-7847263	Chr10:17530617-17530745	Chr10:17679677-17679805	Chr10:17492356-17492484	Chr10:17647524-17647652	Chr10:18066166-18066294	Chr10:17709493-17709621	Chr10:17262598-17262725	Chr10:17459201-17459328	0	0	0	0	Chr10:17059523-17059650	0	0	0	0
ONG1100860	Chr11:9934560-9935126	Chr11:11052173-11052739	WGGU01000490.1:34622-35188	Chr11:10039231-10039797	Chr11:10449214-10449780	Chr11:10421450-10422016	Chr11:9797644-9798210	Chr11:10108672-10109238	Chr11:10076317-10076883	Chr11:10020537-10021103	Chr11:9810143-9810709	0	0	0	0	Chr11:9608634-9609200	Chr11:9317666-9318231	0	0	Chr11:10340433-10352291
ONG0900570	Chr9:4472978-4473224	Chr9:4513586-4513832	Chr9:4453845-4454091	Chr9:4552346-4552610	Chr9:4470415-4470680	Chr9:4467798-4468044	Chr9:4443945-4444210	0	Chr9:4447282-4447528	Chr9:4055911-4056157	Chr9:4181392-4181638	0	0	0	0	Chr9:4709824-4710070	Chr9:3286497-3286743	Chr9:3451603-3451849	0	0
ONG1200820	Chr12:6585763-6585883	Chr12:6770133-6770253	Chr12:6580421-6580541	Chr12:6928169-6928289	Chr12:6451931-6452051	Chr12:6640288-6640408	Chr12:6601494-6601614	Chr12:6470686-6470806	Chr12:6626256-6626376	0	Chr12:6676267-6676387	0	0	0	0	Chr12:6861458-6861578	0	0	Chr12:6884310-6884427	0
ONG0800750	Chr8:16470243-16471319	Chr8:16332359-16333436	Chr8:18218140-18219216,WGGU01000324.1:71857-72934	Chr8:17271158-17272234	Chr8:17375032-17376109	Chr8:16967600-16968677	Chr8:17202170-17203247	0	Chr8:16889358-16890436	0	Chr8:17588103-17589179	0	Chr8:17149611-17150847	0	Chr8:15887356-15888592	Chr8:17077150-17078244	0	0	0	0
ONG0101270	Chr1:24690911-24691014	Chr1:24799485-24799588	Chr1:24819284-24819387	Chr1:24756908-24757011	Chr1:25188625-25188728	Chr1:24425481-24425584	Chr1:24759182-24759285	Chr1:24818431-24818534	Chr1:24436454-24436557	Chr1:23039525-23039628	Chr1:23886496-23886599	Chr1:24096643-24096746	0	0	0	0	Chr1:21153928-21154031	Chr1:21952954-21953057	0	0
ONG0101280	Chr1:12869302-12869576	Chr1:12949699-12949973	Chr1:12743034-12743308	Chr1:12570757-12571031	Chr1:12930907-12931181	Chr1:12809688-12809962	Chr1:12615805-12616079	Chr1:12667171-12667445	Chr1:12803153-12803427	Chr1:12665142-12665416	Chr1:12564879-12565153	0	0	0	0	0	0	0	0	Chr1:11187755-11188031
ONG0200920	Chr2:13199925-13200110	Chr2:12728618-12728803	Chr2:13001814-13001999	Chr2:12943911-12944096	Chr2:12784105-12784290	Chr2:12852650-12852835	Chr2:12902486-12902671	Chr2:12990588-12990773	Chr2:12950405-12950590	Chr2:12807618-12807803	Chr2:12966251-12966436	0	0	0	0	0	0	0	0	0
ONG0200930	Chr2:16162498-16162627	Chr2:15626906-15627035	Chr2:16084035-16084164	Chr2:15849410-15849539	Chr2:16182572-16182701	Chr2:15900014-15900143	Chr2:15860118-15860247	Chr2:15970100-15970229	Chr2:15923084-15923213	Chr2:15749716-15749845	Chr2:16411415-16411544	0	0	0	0	0	Chr2:14505961-14506090	Chr2:15258026-15258155	Chr2:15900846-15900976	Chr2:16934653-16934787
ONG0200940	Chr2:29299032-29299220	Chr2:29046623-29046811	Chr2:29122886-29123074	Chr2:28376163-28376351	Chr2:28827161-28827349	Chr2:29576532-29576720	Chr2:28665989-28666177	Chr2:28795463-28795651	Chr2:28649445-28649633	Chr2:28838781-28838969	Chr2:29453914-29454095	0	0	0	0	0	Chr2:26597091-26597280	Chr2:27215648-27215837	Chr2:28223211-28223393	0
ONG0400920	Chr4:8918750-8920407	Chr4:9609031-9610691	Chr4:8871702-8873354,WGGU01000134.1:136989-138647	Chr4:8981659-8983318	Chr4:8674257-8675921	Chr4:9011052-9012713	Chr4:7913529-7915187	Chr4:9198430-9200089	Chr4:9549665-9551324	Chr4:8240598-8242256	Chr4:8207738-8209398	0	0	0	0	0	0	0	0	0
ONG0400930	Chr4:12400496-12400698	Chr4:12809350-12809552	Chr4:12735168-12735370	Chr4:12694086-12694288	Chr4:12444966-12445168	Chr4:12776384-12776586	Chr4:11400788-11400990	Chr4:12938208-12938410	Chr4:13477642-13477844	Chr4:11335158-11335360	Chr4:11760856-11761058	0	0	0	0	0	0	0	0	0
ONG0500670	Chr5:20091168-20091239	Chr5:20132183-20132254	Chr5:19961157-19961228	Chr5:19732708-19732779	Chr5:20086239-20086310	Chr5:19880734-19880805	Chr5:20151116-20151187	Chr5:19809786-19809857	Chr5:19869246-19869317	Chr5:19938656-19938727	Chr5:19866526-19866597	0	0	0	0	0	0	0	0	0
ONG0500680	Chr5:24153222-24153513	Chr5:24172396-24172687	Chr5:23957247-23957538	Chr5:23821106-23821397	Chr5:24124478-24124769	Chr5:23974072-23974363	Chr5:24266670-24266961	Chr5:23804678-23804969	Chr5:23886543-23886834	Chr5:24061529-24061820	Chr5:23894958-23895250	0	0	0	0	0	Chr5:20128263-20128556	Chr5:19939395-19939688	Chr5:22821159-22821451	0
ONG0900580	Chr9:8816860-8816965	Chr9:8653822-8653927	Chr9:8786744-8786849	Chr9:8649882-8649987	Chr9:8797593-8797698	Chr9:8622657-8622762	Chr9:9064217-9064322	Chr9:7736746-7736851	Chr9:8786161-8786266	Chr9:8687921-8688026	Chr9:8112820-8112925	0	0	0	0	0	Chr9:7084739-7084845	Chr9:6754865-6754971	0	0
ONG0900590	Chr9:16936831-16936900	Chr9:17606164-17606233	Chr9:16976043-16976112	Chr9:17223492-17223561	Chr9:17822115-17822184	Chr9:17811377-17811446	Chr9:17402570-17402639	Chr9:16037025-16037094	Chr9:17277259-17277328	Chr9:17541787-17541856	Chr9:16788247-16788316	0	0	0	0	0	0	0	0	0
ONG1000600	Chr10:15996490-15996956	Chr10:15976138-15976602	Chr10:9537276-9537740,WGGU01000450.1:100531-100995	Chr10:15941689-15942153	Chr10:16080615-16081079	Chr10:15908592-15909056	Chr10:16056822-16057286	Chr10:16453751-16454215	Chr10:16124549-16125013	Chr10:15608821-15609285	Chr10:15793108-15793572	0	0	0	0	0	0	0	0	0
ONG1100870	Chr11:6325716-6326236	Chr11:5991768-6025629	Chr11:6376238-6410001	Chr11:6147216-6181023	Chr11:6050043-6083891	Chr11:6022515-6056348	Chr11:6005650-6039489	Chr11:6467811-6501614	Chr11:6118847-6123563	Chr11:6385010-6418757	Chr11:6106463-6140167	0	0	0	0	0	0	0	0	0
ONG1100880	Chr11:14206144-14209345	Chr11:14955676-14958877	Chr11:15030717-15030846,WGGU01000511.1:173004-176204	Chr11:14399977-14406869	Chr11:15449643-15452844	Chr11:15106266-15109467	Chr11:13949570-13956466	Chr11:14990276-14990405	Chr11:14553588-14556789	Chr11:14167211-14170412	Chr11:14304499-14307700	0	0	0	0	0	0	0	0	0
ONG1200830	Chr12:20921257-20921481	Chr12:21161167-21161391	Chr12:21218057-21218281	Chr12:21947622-21947846	Chr12:20536738-20536962	Chr12:20247006-20247230	Chr12:20065959-20066183	Chr12:21676311-21676535	Chr12:20954838-20955062	Chr12:21207004-21207228	Chr12:20465857-20466081	0	0	0	0	0	0	0	Chr12:21841704-21841928	0
ONG1200840	Chr12:26284131-26284517	Chr12:26742120-26742506	Chr12:26618737-26619123	Chr12:27181886-27186487	Chr12:26133289-26137890	Chr12:25872271-25872657	Chr12:25342631-25347232	Chr12:27011347-27015948	Chr12:26394050-26394436	Chr12:26325522-26325908	Chr12:25562966-25567498	0	0	0	0	0	Chr12:24875511-24875723	Chr12:24522087-24524426	Chr12:27229422-27231780	Chr12:26073264-26073652
ONG0101290	Chr1:35100366-35104710	Chr1:35132136-35136480	Chr1:35175416-35179760	Chr1:35158920-35163260	Chr1:35407432-35411778	Chr1:34723164-34727510	Chr1:34833318-34837664	0	Chr1:34790652-34794996	Chr1:33291598-33295938	Chr1:34039489-34043836	0	0	0	0	0	0	0	0	0
ONG0301030	Chr3:18861948-18862012	Chr3:19125861-19125925	Chr3:18867866-18867930	Chr3:18733177-18733242	Chr3:18703907-18703971	Chr3:18775276-18775340	Chr3:18680516-18680580	0	Chr3:19047437-19047501	Chr3:18688106-18688170	Chr3:18399218-18399282	Chr3:18460413-18460477	0	0	0	0	0	0	Chr3:18799740-18799804	0
ONG0900600	Chr9:3551435-3551675	Chr9:3591857-3592097	Chr9:3525907-3526147	Chr9:3607644-3607884	Chr9:3548329-3548569	Chr9:3545683-3545923	Chr9:3545153-3545393	0	Chr9:3480395-3480635	Chr9:3248374-3248613	Chr9:3270592-3270831	0	0	0	0	0	0	0	0	0
ONG1000610	Chr10:25189727-25189802	Chr10:25137762-25137837	Chr10:235252-235327	Chr10:25029083-25029158	Chr10:25138229-25138304	Chr10:25120027-25120102	Chr10:25192344-25192419	0	Chr10:25120259-25120334	Chr10:24501272-24501347	Chr10:24880240-24880315	0	0	0	0	0	0	0	0	0
ONG0101300	Chr1:40526063-40526210	Chr1:40568152-40568299	Chr1:40562657-40562804	Chr1:40639977-40640124	Chr1:40751667-40751814	Chr1:40066945-40067092	Chr1:40113376-40113523	Chr1:40575447-40575594	Chr1:40189038-40189185	0	Chr1:39385510-39385662	Chr1:39634926-39635073	0	0	0	0	0	0	0	0
ONG1000620	Chr10:22081565-22090559	Chr10:21978504-21987482	Chr10:3292691-3301689	Chr10:21940025-21949018	Chr10:22017774-22026774	Chr10:22003486-22012403	Chr10:22068671-22077668	Chr10:22424475-22433475	Chr10:22027112-22036094	0	Chr10:21793062-21802062	Chr10:21676258-21685243	0	0	0	0	0	0	0	0
ONG0101310	Chr1:19209681-19210397	Chr1:19406564-19407280	Chr1:19011582-19012298	Chr1:19416713-19417429	Chr1:19384429-19385145	Chr1:18776940-18777656	Chr1:19314374-19315090	Chr1:19355597-19356313	Chr1:19251444-19252160	0	Chr1:19071859-19072576	0	0	0	0	0	0	0	0	0
ONG1200850	Chr12:26375929-26376158	Chr12:26833980-26834209	Chr12:26710540-26710769	Chr12:27277871-27278100	Chr12:26229289-26229518	Chr12:25964117-25964346	Chr12:25438651-25438880	Chr12:27107332-27107561	Chr12:26485818-26486047	0	Chr12:25658936-25659165	0	0	0	0	0	0	0	0	0
ONG0900610	Chr9:18538990-18539186	Chr9:19201914-19202110	Chr9:18564996-18565192	Chr9:18815755-18815951	Chr9:19414741-19414937	Chr9:19403001-19403197	Chr9:18995225-18995421	0	Chr9:18870446-18870642	Chr9:19134733-19134929	Chr9:18368207-18368403	0	0	0	0	0	Chr9:16794397-16794591	Chr9:16265959-16266127	Chr9:18325839-18326033	0
ONG0700700	Chr7:28314740-28315122	Chr7:27676205-27676587	WGGU01000287.1:157274-157656	Chr7:27779726-27780107	Chr7:28461265-28461647	Chr7:28241078-28241460	Chr7:28571736-28572118	Chr7:28433699-28434081	Chr7:27877009-27877391	0	Chr7:26714757-26715139	0	0	0	0	0	0	0	0	0
ONG0600840	VXJH01000029.1:167082-167328	Chr6:24830138-24830384	Chr6:24884606-24884852	0	Chr6:24510389-24510635	Chr6:24726612-24726858	Chr6:24799923-24800169	0	Chr6:24937935-24938181	Chr6:24286974-24287220	Chr6:24427275-24427521	0	0	0	0	Chr6:24542479-24542725	Chr6:22573519-22573749	Chr6:22200927-22201157	0	0
ONG0200950	Chr2:22591310-22591547	Chr2:22697741-22697978	Chr2:22535155-22535385	0	Chr2:22440831-22441055	Chr2:22782202-22782439	Chr2:22205731-22205961	Chr2:22408973-22409197	Chr2:22320972-22321202	Chr2:21990427-21990664	Chr2:22729737-22729967	0	0	0	0	0	Chr2:20817779-20818009	Chr2:21361763-21361993	Chr2:21883754-21883984	Chr2:23262985-23263214
ONG0400940	Chr4:14531519-14531613	Chr4:14786976-14787070	0	Chr4:14831514-14831608	Chr4:14606294-14606388	Chr4:14921010-14921104	Chr4:13664170-13664264	Chr4:15163838-15163932	Chr4:15645509-15645603	Chr4:13598514-13598608	Chr4:14008361-14008455	0	0	0	0	0	0	0	0	0
ONG1200860	Chr12:18752693-18752927	Chr12:18997068-18997302	0	Chr12:19618691-19618926	Chr12:18146178-18146396	Chr12:18038275-18038493	Chr12:17910499-17910717	Chr12:19240701-19240935	Chr12:18814503-18814737	Chr12:18944966-18945200	Chr12:18265639-18265873	0	0	0	0	0	0	0	0	0
ONG0101320	Chr1:11996052-11996126	0	Chr1:11861612-11861686	Chr1:11690071-11690145	Chr1:12057588-12057662	Chr1:11936501-11936575	Chr1:11725956-11726030	Chr1:11786926-11787000	Chr1:11992668-11992742	Chr1:11783467-11783541	Chr1:11629103-11629177	0	0	0	0	Chr1:11717856-11717930	0	0	0	0
ONG0200960	Chr2:24011076-24011375	0	Chr2:23957468-23957767	Chr2:23544046-23544343	Chr2:23883985-23884282	Chr2:24216664-24216961	Chr2:23662217-23662516	Chr2:23852117-23852414	Chr2:23789296-23789593	Chr2:23438142-23438436	Chr2:24153199-24153493	0	0	0	0	0	Chr2:22134018-22134318,Chr2:22169154-22169454	0	Chr2:23174141-23174348	0
ONG0301040	Chr3:27394316-27394967	0	WGGU01000088.1:15502-16153	Chr3:27177372-27178024	Chr3:27757383-27758034	Chr3:26996447-26997098	Chr3:26896360-26897011	0	Chr3:27692130-27692781	Chr3:27291666-27292318	Chr3:27079681-27080333	0	0	0	0	0	0	0	0	0
ONG0101330	0	Chr1:41961852-41962236	Chr1:41935576-41935960	Chr1:42041117-42041501	Chr1:42125642-42126026	Chr1:41480443-41480827	Chr1:41526956-41527340	Chr1:41936749-41937125	Chr1:41551315-41551699	Chr1:40009648-40010032	Chr1:40721149-40721533	0	0	0	0	Chr1:40721858-40722242	0	0	0	0
ONG0301050	0	Chr3:30659430-30659603	Chr3:29925432-29925605	Chr3:29598777-29598950	Chr3:30279190-30279363	Chr3:29381763-29381936	Chr3:29319045-29319218	Chr3:29915939-29916112	Chr3:30123665-30123838	Chr3:29745868-29746041	Chr3:29612989-29613162	0	0	0	0	Chr3:29009430-29009602	0	0	0	0
ONG0400950	0	Chr4:13890519-13890800	Chr4:13813480-13813761	Chr4:13786013-13786294	Chr4:13508056-13508337	Chr4:13873050-13873331	Chr4:12482963-12483244	Chr4:14061363-14061644	Chr4:14588409-14588690	Chr4:12475975-12476256	Chr4:12894902-12895183	0	0	0	0	0	0	0	Chr4:11474908-11475189	Chr4:12249647-12249928
ONG0200970	0	Chr2:24886012-24886064	Chr2:24563812-24563864	0	Chr2:24499163-24499215	Chr2:24797507-24797559	Chr2:24223839-24223891	Chr2:24467289-24467341	Chr2:24396239-24396291	Chr2:24070946-24070998	Chr2:24728765-24728817	0	0	0	0	0	Chr2:22683167-22683218	Chr2:23328465-23328516	0	0
ONG0200980	Chr2:22558490-22559436	Chr2:22664921-22665867	Chr2:22465943-22466844	Chr2:22022297-22023196	Chr2:22371616-22372517	Chr2:22749431-22750087	Chr2:22136509-22137410	Chr2:22339757-22340658	Chr2:22251750-22252651	Chr2:21957657-21958313	Chr2:22660530-22661431	0	0	0	0	0	Chr2:20771293-20771852	Chr2:21315289-21315848	Chr2:21825957-21826883	0
ONG0301060	0	0	0	Chr3:34080338-34080479	Chr3:34615965-34616106	Chr3:33885634-33885775	Chr3:33916052-33916193	Chr3:34315912-34316053	Chr3:34567625-34567770	Chr3:34012899-34013040	Chr3:33888383-33888524	0	0	0	0	0	0	0	0	0
ONG0600850	Chr6:21453108-21454224	Chr6:21146121-21147237	Chr6:21249262-21250378	Chr6:21746999-21748114	Chr6:20932242-20933307	Chr6:21139980-21141096	Chr6:21309410-21310526	Chr6:21007901-21009017	Chr6:21329615-21330731	0	0	0	0	0	0	0	0	0	0	0
ONG0101340	Chr1:37437464-37438805	Chr1:37388392-37389731	Chr1:37414817-37416157	Chr1:37485860-37487203	Chr1:37676666-37678005	Chr1:36992402-36993741	Chr1:37039038-37040377	Chr1:37407783-37409122	Chr1:37100427-37101768	Chr1:35563243-35564582	0	0	0	0	0	0	0	0	0	0
ONG0101350	Chr1:43332332-43332539	Chr1:43183801-43184008,Chr1:43164314-43164521	Chr1:43142944-43143153,Chr1:43123458-43123665	Chr1:43274509-43274716,Chr1:43255022-43255229	Chr1:43330294-43330501	Chr1:42704465-42704672,Chr1:42684978-42685185	Chr1:42659347-42659554,Chr1:42639858-42640065	Chr1:43151075-43151282	Chr1:42771062-42771269,Chr1:42751575-42751782	Chr1:41166758-41166965	0	0	0	0	0	0	0	0	Chr1:43973213-43973389	0
ONG0200990	Chr2:12843853-12843943	Chr2:12372535-12372625	Chr2:12645887-12645977	Chr2:12587914-12588004	Chr2:12428065-12428155	Chr2:12496623-12496713	Chr2:12546204-12546294	Chr2:12634560-12634650	Chr2:12594060-12594152	Chr2:12451595-12451685	0	0	0	0	0	0	0	0	0	0
ONG0301070	Chr3:14185675-14190309	Chr3:14198458-14203098	Chr3:14137952-14142630	Chr3:14089744-14094426	Chr3:14094199-14098881	Chr3:14041133-14045796	Chr3:14004836-14009518	Chr3:14087055-14091737	Chr3:14412974-14417643	Chr3:14044733-14049415	0	0	0	0	0	0	0	0	0	0
ONG0400960	Chr4:14009218-14020931	Chr4:14314646-14326341	Chr4:14357877-14369562,WGGU01000147.1:59478-71182	Chr4:14253897-14265526	Chr4:13988792-14000434	Chr4:14342683-14354336	Chr4:13080224-13091873	Chr4:14638401-14650106	Chr4:15165397-15177106	Chr4:13045633-13057334	Chr4:13467329-13479300	0	0	0	0	0	0	0	0	0
ONG0900620	Chr9:15703414-15703894	Chr9:16329016-16329496	Chr9:15750459-15750939	Chr9:15988370-15988847	Chr9:16581316-16581796	Chr9:16549267-16549747	Chr9:16162297-16162777	Chr9:14759759-14760239	Chr9:16055806-16056286	Chr9:16284005-16284485	0	0	0	0	0	0	0	0	0	0
ONG1100890	Chr11:4450603-4450661	Chr11:4461877-4461935	Chr11:4520470-4520528,WGGU01000469.1:15524-15582	Chr11:4589830-4589888	Chr11:4530852-4530910	Chr11:4503479-4503537	Chr11:4487212-4487270	Chr11:4567660-4567718	Chr11:4536193-4536251	Chr11:4514403-4514461	0	0	0	0	0	0	Chr11:4296265-4296318	Chr11:4558584-4558642	Chr11:4594051-4594109	Chr11:4514265-4514323
ONG0900630	Chr9:5133585-5133639	Chr9:5174312-5174366	Chr9:5325172-5325226,WGGU01000370.1:31070-31124	Chr9:5212377-5212431	Chr9:5131295-5131349	Chr9:5128572-5128626	Chr9:5336088-5336142	0	Chr9:5314061-5314115	Chr9:4866311-4866365	0	0	0	0	0	0	0	0	0	0
ONG0900640	Chr9:19564443-19564537	Chr9:20227786-20227880	Chr9:19583633-19583727	Chr9:19854993-19855087	Chr9:20426853-20426947	Chr9:20434217-20434311	Chr9:20026595-20026689	0	Chr9:19902050-19902144	Chr9:20104474-20104568	0	0	0	0	0	0	Chr9:17719675-17719769	Chr9:17196903-17196997	0	0
ONG0101360	Chr1:3896074-3896126	Chr1:3980801-3980853	Chr1:3945117-3945169,WGGU01000031.1:30360-30412	Chr1:3966490-3966542	Chr1:3966528-3966580	Chr1:3982320-3982372	Chr1:3863947-3863999	Chr1:3894704-3894756	Chr1:3915555-3915607	0	0	0	0	0	0	0	0	0	0	0
ONG0200890	Chr2:37753314-37753755	Chr2:37380036-37380477	Chr2:37525526-37525970	Chr2:36708962-36709404	Chr2:37179156-37179598	Chr2:38020245-38020687	Chr2:36989086-36989528	Chr2:37138925-37139376	Chr2:36940873-36941315	Chr2:37201453-37201902	Chr2:37686573-37687022	Chr2:36371562-36372011	Chr2:36262830-36263279	Chr2:35839512-35839961	Chr2:36447576-36448025	Chr2:35817652-35818101	Chr2:34361262-34361714	Chr2:34976356-34976809	Chr2:36842881-36843350	Chr2:37205308-37205751
ONG0301080	Chr3:36415655-36416801	Chr3:37205531-37206677	Chr3:36198311-36199457	Chr3:35928696-35929842	Chr3:36445168-36446314	Chr3:35709319-35710465	Chr3:35740010-35741156	Chr3:36165740-36166886	Chr3:36388679-36389825	0	0	0	0	0	0	0	0	0	0	0
ONG0400970	Chr4:12746090-12746228	Chr4:13124708-13124846	Chr4:13051313-13051451,WGGU01000142.1:73003-73141	Chr4:13009209-13009348	Chr4:12753256-12753395	Chr4:13091630-13091768	Chr4:11729241-11729380	Chr4:13253575-13253714	Chr4:13783772-13783910	0	0	0	0	0	0	0	0	0	0	0
ONG0500690	Chr5:25061617-25061837	Chr5:25050911-25051131	Chr5:24832892-24833112	Chr5:24700057-24700276	Chr5:24989969-24990189	Chr5:24857330-24857550	Chr5:25138365-25138585	Chr5:24678469-24678689	Chr5:24791171-24791391	0	0	0	0	0	0	0	0	0	0	0
ONG0800760	Chr8:2040808-2040858	Chr8:2017162-2017212	Chr8:2113952-2114002	Chr8:2076018-2076068	Chr8:2129577-2129627	Chr8:2093571-2093621	Chr8:2025714-2025764	Chr8:2178513-2178563	Chr8:1919985-1920035	0	0	0	0	0	0	0	0	0	0	Chr8:2270145-2270195
ONG0900650	Chr9:18420832-18420910	Chr9:19083764-19083842	Chr9:18446854-18446932	Chr9:18697693-18697771	Chr9:19296589-19296667	Chr9:19284920-19284998	Chr9:18877211-18877289	Chr9:17546424-17546502	Chr9:18752330-18752408	0	0	0	0	0	0	0	0	0	0	0
ONG1000630	Chr10:10156804-10156905	Chr10:10293373-10293474	Chr10:15300284-15300385,WGGU01000437.1:249790-249891	Chr10:9849928-9850029	Chr10:10371953-10372054	Chr10:9807815-9807916	Chr10:10521671-10521772	Chr10:10859453-10859554	Chr10:9951597-9951698	0	0	0	0	0	0	0	0	0	0	0
ONG1000640	Chr10:15675274-15675916	Chr10:15663374-15664018	Chr10:9839672-9840316	Chr10:15619859-15620495	Chr10:15745221-15745857	Chr10:15586927-15587571	Chr10:15735349-15735992	Chr10:16151023-16151669	Chr10:15803059-15803702	0	0	0	0	0	0	0	0	0	0	0
ONG0900660	Chr9:5351848-5390780	Chr9:5392625-5431570	Chr9:5543463-5582403	Chr9:5430600-5469540	Chr9:5349477-5388419	Chr9:5346946-5385888	Chr9:5554395-5592615	0	Chr9:5532314-5571253	Chr9:5327711-5364206	0	Chr9:5325564-5355266	Chr9:5461509-5491211	0	0	Chr9:5672600-5706169	Chr9:4289676-4316548	Chr9:4403780-4430667	0	0
ONG0301090	Chr3:14092252-14092316	Chr3:14117084-14117148	Chr3:14007626-14007690	Chr3:13959861-13959925	Chr3:13963780-13963844	Chr3:13955667-13955731	Chr3:13918667-13918731	Chr3:13956636-13956700	Chr3:14282664-14282728	Chr3:13958531-13958595	0	0	0	0	0	0	0	0	0	0
ONG0800770	Chr8:23516474-23519827	Chr8:23416991-23420332	Chr8:24980047-24983399	Chr8:23968676-23971842	Chr8:24576791-24580142	Chr8:24155502-24158857	Chr8:24294518-24297872	Chr8:24384364-24387715	Chr8:23877113-23880465	Chr8:23814578-23817930	Chr8:24243030-24246274	0	0	0	0	Chr8:23697819-23701170	0	0	0	0
ONG1200870	Chr12:1680156-1680381	Chr12:1820127-1820352	Chr12:1851765-1851990	0	Chr12:1801985-1802210	Chr12:1805995-1806220	Chr12:1767109-1767334	Chr12:1841371-1841596	Chr12:1814152-1814377	Chr12:1771523-1771748	0	0	0	0	0	0	0	0	0	0
ONG0700710	Chr7:7028953-7029201	Chr7:6635412-6635660	Chr7:6661853-6662101	0	Chr7:6690875-6691123	Chr7:6727195-6727443	Chr7:7125382-7125630	Chr7:6960012-6960260	Chr7:6660756-6661004	0	0	0	0	0	0	0	0	0	0	0
ONG0700720	Chr7:7052295-7052373	Chr7:6658753-6658831	Chr7:6685218-6685296	0	Chr7:6714216-6714294	Chr7:6750537-6750615	Chr7:7148724-7148802	Chr7:6983354-6983432	Chr7:6684100-6684178	0	0	0	0	0	0	0	0	0	0	0
ONG0500700	Chr5:14763510-14802554	Chr5:14655507-14694615	Chr5:14610932-14650040	Chr5:14479670-14518368	Chr5:14757330-14796432	Chr5:14640936-14680041	Chr5:14862541-14901650	Chr5:14557910-14597011	Chr5:14573226-14612247	Chr5:14781280-14813230	0	0	0	0	0	0	0	0	0	0
ONG0700730	Chr7:10400375-10400611	Chr7:10173861-10174097	0	Chr7:10352083-10352315	Chr7:10007588-10007824	Chr7:10260008-10260244	Chr7:10655312-10655548	Chr7:10314287-10314523	Chr7:10193365-10193601	0	0	0	0	0	0	0	0	0	0	0
ONG0700740	Chr7:25628494-25628743	Chr7:25089664-25089913	0	Chr7:25177019-25177268	Chr7:25833523-25833772	Chr7:25675359-25675608	Chr7:26035836-26036085	Chr7:25869698-25869947	Chr7:25317628-25317877	0	0	0	0	0	0	0	0	0	0	0
ONG0700750	Chr7:9829588-9829685	Chr7:9603130-9603227	0	0	Chr7:9437420-9437517	Chr7:9688832-9688929	Chr7:10084105-10084202	Chr7:9743419-9743516	Chr7:9622136-9622233	0	0	0	0	0	0	0	0	0	0	0
ONG1200880	Chr12:6819733-6820224	Chr12:6998031-6998522	0	0	Chr12:6679846-6680337	Chr12:6872998-6873489	Chr12:6834215-6834706	Chr12:6698703-6699194	Chr12:6854126-6854617	0	0	0	0	0	0	0	0	0	0	0
ONG0101370	Chr1:26840954-26841106	0	Chr1:26999857-27000009	Chr1:26861439-26861591	Chr1:27272616-27272768	Chr1:26511553-26511705	Chr1:26683403-26683555	Chr1:26904756-26904908	Chr1:26537641-26537793	0	0	0	0	0	0	0	0	0	0	0
ONG0600860	Chr6:7500084-7500711	0	Chr6:7247180-7247807	Chr6:7247681-7248308	Chr6:7029997-7030624	Chr6:7354857-7355484	Chr6:7789447-7790074	Chr6:7120256-7120883	Chr6:7120446-7121075	0	0	0	0	0	0	0	0	0	0	0
ONG0301100	Chr3:27449790-27450245	0	WGGU01000088.1:70982-71437	Chr3:27232863-27233318	Chr3:27813007-27813462	Chr3:27051887-27052342	Chr3:26951806-26952261	0	Chr3:27747605-27748060	0	0	0	0	0	0	0	0	0	0	0
ONG0101380	Chr1:32226278-32226392	0	0	Chr1:32248903-32249017	Chr1:32609220-32609334	Chr1:31925574-31925688	Chr1:32050165-32050279	0	Chr1:31966619-31966733	0	0	0	0	0	0	0	0	0	0	0
ONG0800780	0	Chr8:12472096-12484382	Chr8:14330959-14343234	0	Chr8:13524576-13536851	Chr8:13123295-13135574	Chr8:13346244-13358519	Chr8:13139242-13151517	Chr8:13028592-13040869	Chr8:13249515-13261791	0	0	0	0	0	0	0	0	0	0
ONG0900670	Chr9:8796992-8803376	Chr9:8634471-8640277	Chr9:8766824-8773204	Chr9:8630702-8636319	Chr9:8778245-8784052	Chr9:8603309-8609116	Chr9:9044869-9050676	Chr9:7717326-7723133	Chr9:8766764-8772569	Chr9:8668554-8674359	0	0	0	0	0	0	0	0	0	Chr9:8175316-8181167
ONG0700760	0	Chr7:17051196-17051249	0	0	Chr7:17860485-17860538	Chr7:17704059-17704112	Chr7:18075392-18075445	0	Chr7:17229310-17229363	0	0	0	0	0	0	0	0	0	0	0
ONG0700770	0	Chr7:17128332-17128801	0	0	Chr7:17937744-17938215	Chr7:17781206-17781675	Chr7:18152572-18153041	0	Chr7:17306450-17306919	0	0	0	0	0	0	0	0	0	0	0
ONG1200890	0	0	Chr12:1531409-1534232	0	Chr12:1487044-1489867	Chr12:1491444-1494267	Chr12:1452551-1455374	Chr12:1526590-1529413	Chr12:1493872-1496695	0	0	0	0	0	0	0	0	0	0	0
ONG0500710	Chr5:18690475-18690832	Chr5:18657241-18657597	Chr5:18534935-18535291	Chr5:18284295-18284651	Chr5:18611310-18611666	0	Chr5:18758705-18759061	Chr5:18409391-18409747	Chr5:18448562-18448918	Chr5:18636726-18637082	Chr5:18566402-18566765	0	0	0	0	0	0	0	0	0
ONG1000650	Chr10:3365077-3365172	Chr10:3431479-3431574	Chr10:21956444-21956539	0	Chr10:3481896-3481991	0	Chr10:3353076-3353171	Chr10:3431309-3431404	Chr10:3442681-3442776	0	Chr10:3427660-3427755	0	0	0	0	Chr10:3206907-3207002	0	0	0	0
ONG0400980	Chr4:18831745-18832297	Chr4:18114904-18115395	Chr4:18675828-18676319	0	Chr4:18512038-18512529	0	Chr4:16594655-16595146	0	Chr4:18872343-18872834	0	Chr4:16916951-16917507	0	0	0	0	0	0	0	0	0
ONG0400990	Chr4:18693353-18693522,Chr4:19047332-19047501	Chr4:19630509-19630674	Chr4:20298112-20298277	0	Chr4:20170049-20170214	0	Chr4:18195926-18196091	0	Chr4:20520634-20520799	0	Chr4:17127199-17127368	0	0	0	0	0	Chr4:14837205-14837373	Chr4:14875401-14875569	0	Chr4:16518985-16519153
ONG1000660	0	0	0	Chr10:20355643-20355696	Chr10:20413402-20413455	0	Chr10:20466449-20466502	Chr10:20829551-20829604	Chr10:20399395-20399448	0	Chr10:20127713-20127766	Chr10:20122649-20122702	0	0	0	0	0	0	0	0
ONG1000670	Chr10:21020735-21020792	Chr10:20919228-20919285	WGGU01000458.1:88263-88320	Chr10:20884457-20884514	Chr10:20967754-20967811	0	Chr10:20999451-20999508	Chr10:21362658-21362715	Chr10:20953568-20953625	Chr10:20402077-20402134	0	Chr10:20653010-20653067	0	0	0	0	0	0	0	0
ONG0401000	Chr4:20302486-20303126	Chr4:19905248-19905883	Chr4:20566548-20567188	Chr4:19588574-19589208	Chr4:20438512-20439152	0	Chr4:18438181-18438821	0	Chr4:20789053-20789693	0	0	0	0	0	0	0	Chr4:16052021-16052661	Chr4:16103530-16104170	0	0
ONG1000570	Chr10:3109545-3144723	Chr10:3176083-3211190	Chr10:22167487-22202633,WGGU01000418.1:21177-24786	Chr10:3217589-3221277	Chr10:3226361-3261541	Chr10:3217851-3221459	Chr10:3097647-3132825	Chr10:3175788-3210967	Chr10:3181989-3217152	Chr10:3078502-3082111	0	Chr10:3092041-3095650	Chr10:3077870-3081479	Chr10:2755953-2759476	Chr10:2661288-2664899	0	0	0	0	0
ONG0201000	Chr2:9526821-9527149	Chr2:8972335-8972663	0	Chr2:9160821-9161149	Chr2:9263115-9263443	Chr2:9234928-9235256	Chr2:9321024-9321352	0	Chr2:9231371-9231699	0	0	0	0	0	0	0	0	0	0	0
ONG0600870	Chr6:7258413-7258651	0	0	0	Chr6:6846535-6846773	0	Chr6:7557923-7558161	0	Chr6:6889682-6889925	0	0	0	0	0	0	Chr6:7094981-7095214	0	0	0	0
ONG0900680	Chr9:6251673-6251723	Chr9:6292398-6292448	Chr9:6443489-6443539	Chr9:6351174-6351224	Chr9:6249711-6249761	Chr9:6247268-6247318	Chr9:6449556-6449606	Chr9:5510455-5510505	0	Chr9:6158763-6158813	0	0	Chr9:6182714-6182764	0	Chr9:5616740-5616790	0	0	0	0	0
ONG1000680	Chr10:18371493-18371738	Chr10:18304427-18304672	Chr10:7073062-7073307,WGGU01000454.1:258091-258326	Chr10:18296795-18297041	Chr10:18369155-18369400	Chr10:18279420-18279665	Chr10:18434616-18434861	Chr10:18738025-18738270	0	0	0	Chr10:18109873-18110118	Chr10:19065283-19065528	0	Chr10:16921982-16922227	0	0	0	0	0
ONG0300990	Chr3:30538635-30538799	Chr3:31287561-31287725	WGGU01000094.1:37394-37558	Chr3:30222735-30222899	Chr3:30911477-30911618	0	Chr3:30022295-30022459	Chr3:30566259-30566423	0	Chr3:30378329-30378470	Chr3:30244831-30244972	Chr3:29830580-29830744	Chr3:28893359-28893523	Chr3:27848767-27848931	Chr3:29269946-29270110	Chr3:29700106-29700270	Chr3:27335170-27335473	Chr3:27090969-27091272	0	0
ONG0700780	0	Chr7:21213696-21214083	0	0	Chr7:21840568-21840955	Chr7:21683283-21683670	Chr7:22055116-22055503	Chr7:22237907-22238294	0	0	Chr7:20072040-20072427	0	Chr7:21386670-21387057	0	0	0	0	Chr7:19241832-19242219	0	0
ONG0800790	Chr8:18104711-18104828	0	0	Chr8:18624658-18624775	Chr8:19292873-19292990	Chr8:18885016-18885133	Chr8:19076970-19077087	0	0	0	0	0	Chr8:18624035-18624153	0	0	0	0	0	Chr8:17059853-17059970	Chr8:17458044-17458161
ONG1200900	Chr12:3321265-3326968	0	Chr12:3476701-3477810	0	Chr12:3416216-3421914	Chr12:3471039-3476746	Chr12:3432063-3437772	Chr12:3464913-3470612	0	0	0	0	Chr12:3503361-3509061	0	Chr12:3440807-3441553	0	0	0	0	0
ONG1100900	Chr11:19056851-19060176	Chr11:19647821-19651146	Chr11:20226976-20227047	Chr11:19220450-19223780	Chr11:20213179-20213250	0	Chr11:19413164-19413235	Chr11:20243664-20246990	Chr11:19338686-19342011	Chr11:18729148-18732478	Chr11:18976188-18979521	Chr11:17631044-17631115	Chr11:18422122-18422193	0	0	0	0	0	0	0
ONG0301110	Chr3:20611123-20611247	Chr3:21060260-21060382	Chr3:20581484-20581608	Chr3:20440244-20440366	Chr3:20638396-20638519	Chr3:20437262-20437386	Chr3:20341677-20341801	Chr3:20587078-20587202	0	Chr3:20450356-20450480	Chr3:20172884-20173008	Chr3:20365245-20365367	0	0	0	0	Chr3:18652900-18653023	Chr3:18601020-18601143	0	0
ONG0301120	Chr3:20622193-20622426	Chr3:21071637-21071869	Chr3:20592553-20592785	Chr3:20451304-20451537	Chr3:20649774-20650006	Chr3:20448324-20448557	Chr3:20352739-20352971	Chr3:20598147-20598379	0	Chr3:20487015-20487247	Chr3:20204083-20204315	Chr3:20376373-20376605	0	0	0	0	0	0	0	0
ONG0600880	Chr6:26242368-26242493	Chr6:25988591-25988716	Chr6:26073639-26073764	Chr6:26612867-26612992	Chr6:25714258-25714383	Chr6:25931642-25931767	Chr6:25972362-25972487	0	0	0	Chr6:25676064-25676189	0	0	0	0	0	0	0	0	0
ONG0600890	Chr6:26319120-26319404	Chr6:26065524-26065808	Chr6:26150444-26150728	Chr6:26689315-26689599	Chr6:25791192-25791476	Chr6:26008500-26008784	Chr6:26049095-26049379	0	0	0	Chr6:25752822-25753106	0	0	0	0	0	0	0	0	0
ONG0700790	Chr7:21975865-21976072	Chr7:21557277-21557484	0	0	Chr7:22171483-22171688	Chr7:22014157-22014364	Chr7:22385754-22385959	0	0	0	Chr7:20412573-20412777	0	0	0	0	0	0	0	0	0
ONG0700800	0	Chr7:23479249-23479386	Chr7:22888913-22889050	Chr7:23629541-23629682	Chr7:24279718-24279855	Chr7:24121941-24122078	Chr7:24487908-24488048	Chr7:24318122-24318259	0	Chr7:22707373-22707510	Chr7:22556108-22556245	Chr7:22574375-22574515	0	0	0	0	Chr7:20559600-20559740	Chr7:21203443-21203583	Chr7:23066256-23066396	0
ONG0301130	0	0	Chr3:34108759-34109084,WGGU01000086.1:599550-599880	Chr3:33813704-33814034	Chr3:34353240-34353570	Chr3:33622902-33623232	Chr3:33653323-33653653	Chr3:34053188-34053518	0	Chr3:33757416-33757746	Chr3:33634986-33635316	0	0	0	0	0	Chr3:30590538-30590868	Chr3:30346909-30347239	Chr3:34153945-34154275	0
ONG0700810	0	Chr7:22163525-22163922	Chr7:21536487-21536884	Chr7:22338013-22338410	Chr7:22957827-22958222	Chr7:22800303-22800700	Chr7:23172130-23172527	Chr7:23016259-23016654	0	0	Chr7:21222834-21223207	0	0	0	0	0	Chr7:19340678-19341074	Chr7:20010412-20010808	Chr7:21570204-21570600	Chr7:22599461-22599856
ONG0301140	0	Chr3:38666381-38666845	0	0	Chr3:37902833-37903297	Chr3:37166894-37167356	Chr3:37197720-37198184	Chr3:37623332-37623796	0	Chr3:37248277-37248751	Chr3:37130185-37130659	0	0	0	0	0	0	0	0	0
ONG0201010	Chr2:36840122-36840327	Chr2:36448238-36448443	Chr2:36600876-36601081	Chr2:35761963-35762168	Chr2:36214981-36215186	Chr2:37068139-37068344	Chr2:36041099-36041304	Chr2:36183891-36184096	0	Chr2:36225664-36225869	0	0	0	0	0	0	0	0	0	0
ONG0900690	Chr9:8731962-8732649	Chr9:8554765-8555452	Chr9:8724795-8725482,WGGU01000372.1:105905-106592	Chr9:8591878-8592565	Chr9:8698496-8699183	Chr9:8523561-8524248	Chr9:8965114-8965801	0	0	Chr9:8629728-8630415	0	0	0	0	0	0	0	0	0	0
ONG0600900	Chr6:25903537-25903850	Chr6:25649210-25649523	Chr6:25734514-25734827	Chr6:26274272-26274585	Chr6:25374838-25375151	Chr6:25587382-25587695	Chr6:25637461-25637774	Chr6:25521720-25522033	Chr6:25775045-25775358	Chr6:25141733-25142046	Chr6:25278243-25278556	0	0	0	0	Chr6:25354577-25354890	0	0	0	0
ONG1000690	Chr10:17183746-17183866	Chr10:17201860-17201980	Chr10:8253122-8253242	Chr10:17124723-17124843	Chr10:17273439-17273559	Chr10:17086340-17086460	Chr10:17241638-17241758	Chr10:17660073-17660193	0	0	0	0	0	0	0	0	0	0	0	0
ONG1200910	Chr12:5333739-5333808	Chr12:5393412-5393481	Chr12:5261638-5261707	0	Chr12:5201245-5201314	Chr12:5292310-5292379	Chr12:5253463-5253532	Chr12:5219900-5219969	0	0	0	0	0	0	0	0	Chr12:5156327-5156396	0	Chr12:5503733-5503802	0
ONG1100910	Chr11:9100522-9100881	Chr11:9398414-9398778	0	0	Chr11:9320732-9321096	Chr11:9293367-9293731	Chr11:8964555-8964918	Chr11:9271170-9271534	Chr11:9106326-9106690	0	0	0	0	0	0	0	0	0	0	0
ONG1100920	Chr11:21584652-21584836	Chr11:22322950-22323134	0	0	Chr11:22964820-22965004	Chr11:22336105-22336289	Chr11:21776436-21776620	Chr11:22938548-22938732	0	Chr11:21316423-21316607	0	0	0	0	0	0	0	0	0	0
ONG0101390	0	Chr1:695464-695664	Chr1:688143-688343,WGGU01000544.1:66322-66522	Chr1:720741-720941	Chr1:741116-741316	Chr1:757059-757259	Chr1:715257-715457	0	0	Chr1:719797-719997	0	Chr1:719550-719750	0	0	0	Chr1:747797-747997	0	0	0	0
ONG0201020	Chr2:30263841-30264143	Chr2:29938016-29938309	Chr2:30013301-30013594	Chr2:29263994-29264287	Chr2:29718453-29718746	Chr2:30468053-30468346	Chr2:29557919-29558212	Chr2:29686825-29687118	Chr2:29540958-29541251	0	Chr2:30342797-30343085	0	0	0	0	0	0	0	0	0
ONG0201030	0	Chr2:34740610-34742004	Chr2:34884105-34885499	Chr2:34044163-34045557	Chr2:34505316-34506710	Chr2:35337368-35338762	Chr2:34354026-34355420	Chr2:34487761-34489155	0	0	0	0	0	0	0	0	0	0	0	0
ONG0800800	0	Chr8:10200619-10202082	Chr8:11902493-11903954,WGGU01000315.1:72712-74173	0	Chr8:11071237-11072700	Chr8:10670597-10672060	Chr8:10940983-10942446	Chr8:10682427-10683889	0	0	0	0	0	0	0	0	0	0	0	0
ONG0301150	0	Chr3:38754728-38754887	0	Chr3:37514290-37514449	Chr3:37990725-37990884	Chr3:37255255-37255414	Chr3:37286086-37286245	Chr3:37711706-37711865	0	0	0	0	0	0	0	0	0	0	0	0
ONG1100930	Chr11:5784909-5785730	Chr11:5806075-5806154	0	Chr11:5961030-5961109	Chr11:5864168-5864247	Chr11:5836678-5836757	Chr11:5819817-5819896	0	0	0	0	0	0	0	0	0	0	0	0	0
ONG0101400	0	0	Chr1:19769027-19769359	0	Chr1:20113003-20113335	Chr1:19517722-19518054	Chr1:20176672-20177004	Chr1:20107961-20108293	0	0	0	Chr1:19230963-19231295	0	0	0	0	Chr1:17245211-17245547	Chr1:17976524-17976849	0	0
ONG0301160	0	0	0	Chr3:34012576-34012676	Chr3:34551171-34551271	Chr3:33820840-33820940	Chr3:33851255-33851355	Chr3:34251118-34251218	0	Chr3:33953992-33954092	0	0	0	0	0	0	Chr3:30768316-30768416	Chr3:30524529-30524629	Chr3:34354531-34354629	0
ONG0401010	0	0	0	Chr4:14955458-14977175	Chr4:14730223-14751945	Chr4:15044830-15066468	Chr4:13788098-13809813	Chr4:15287789-15309507	0	0	0	0	0	0	0	0	0	0	0	0
ONG0401020	0	0	0	Chr4:33493959-33494858	Chr4:34067962-34068861	Chr4:33715752-33716650	Chr4:32084086-32084985	0	0	0	0	0	0	0	0	0	0	0	0	0
ONG1100940	0	0	0	Chr11:6823166-6823563	Chr11:6725965-6726362	Chr11:6698710-6699107	Chr11:6681874-6682271	0	0	0	0	0	0	0	0	0	0	0	0	0
ONG0600910	0	0	0	0	Chr6:24503885-24504373	Chr6:24720108-24720596	Chr6:24793419-24793907	0	0	0	0	0	0	0	0	0	0	0	0	0
ONG0201040	Chr2:10666034-10666256	0	Chr2:10359362-10359584	0	Chr2:10169604-10169826	0	Chr2:10334746-10334968	0	0	0	0	0	0	0	0	0	Chr2:10141958-10142166	Chr2:10143815-10144025	Chr2:10505731-10505941	Chr2:10773851-10774073
ONG1100950	0	Chr11:25039578-25039943	0	0	Chr11:25639242-25639607	0	Chr11:24451091-24451456	0	0	0	0	0	0	0	0	0	0	0	0	0
ONG0201050	0	0	0	0	Chr2:8939009-8940099	0	Chr2:9004941-9006031	0	0	0	0	0	0	0	0	0	0	0	0	0
ONG0800810	0	0	0	0	Chr8:5514538-5514754	0	Chr8:5422925-5423141	0	0	0	0	0	0	0	0	0	0	0	0	0
ONG1100960	Chr11:22224478-22224532	0	0	0	Chr11:23467838-23467892	Chr11:22838866-22838920	0	0	Chr11:22635807-22635861	0	0	Chr11:20730326-20730380	0	0	Chr11:19944000-19944054	0	0	0	0	0
ONG0600920	Chr6:9410394-9412647	Chr6:8945326-8950914	Chr6:8889459-8891713	Chr6:9207079-9209331	Chr6:8925320-8927573	Chr6:8986323-8991915	0	Chr6:8818525-8824118	Chr6:9108288-9110544	Chr6:9111621-9113876	Chr6:9213957-9216236	Chr6:9222128-9227823	Chr6:8947117-8952811	0	Chr6:9046645-9048702	Chr6:9064658-9066655	Chr6:8949412-8956185	Chr6:8763554-8765739	Chr6:9278891-9281144	0
ONG1100970	Chr11:19573603-19573889,VXJH01000074.1:94309-94538	Chr11:20175151-20175437	Chr11:20592236-20592522,WGGU01000489.1:116624-116910	Chr11:19752704-19752990	Chr11:20704290-20704573	0	Chr11:19755257-19755543	Chr11:20726245-20726528	Chr11:19833585-19833868	0	0	0	Chr11:18932607-18932893	0	0	0	0	0	0	0
ONG1200920	Chr12:22243519-22243765	Chr12:22677380-22677626	Chr12:22605417-22605578	Chr12:23243455-23243700	Chr12:22057393-22057639	Chr12:21844520-21844766	0	Chr12:23030011-23030257	Chr12:22330337-22330583	Chr12:22514143-22514385	Chr12:21696417-21696659	0	0	0	0	0	0	0	0	0
ONG0101410	Chr1:16894017-16894221	Chr1:17095970-17096176	Chr1:16518225-16518429	Chr1:16917362-16917566	Chr1:17088263-17088469	Chr1:16907678-16907884	0	Chr1:17055705-17055909	Chr1:16945477-16945683	0	Chr1:16731815-16732019	0	0	0	0	0	0	0	0	0
ONG0101420	Chr1:18803261-18814669	Chr1:18988022-18999414	Chr1:18477031-18488398	Chr1:18868378-18879708	Chr1:18965766-18977180	Chr1:18358331-18369742	Chr1:18961135-18965770	Chr1:18948874-18960287	Chr1:18832920-18844329	0	Chr1:18699673-18710979	0	0	0	0	0	0	0	0	0
ONG1100980	Chr11:13572511-13572588	Chr11:13970831-13970908	Chr11:14309153-14309230	0	Chr11:14758092-14758169	Chr11:14414790-14414867	0	0	Chr11:13744842-13744919	Chr11:13474504-13474581	Chr11:13630556-13630633	0	0	0	0	0	0	0	0	0
ONG0401030	0	Chr4:9120023-9120075	WGGU01000120.1:410933-410985	Chr4:8493073-8493125	Chr4:8178544-8178596	Chr4:8522141-8522193	0	Chr4:8709511-8709563	Chr4:8990825-8990877	0	0	0	0	0	0	0	0	0	0	0
ONG0101430	0	Chr1:13977343-13977454	Chr1:13796136-13796247	Chr1:13763578-13763691	Chr1:13969441-13969552	Chr1:13848168-13848279	Chr1:13714278-13714370	0	Chr1:13828433-13828544	0	0	0	0	0	0	0	0	0	0	0
ONG0401040	0	Chr4:282542-282707	0	Chr4:270227-270392	Chr4:284016-284181	Chr4:271624-271789	0	Chr4:315106-315271	Chr4:275605-275770	0	0	0	0	0	0	0	Chr4:373181-373350	0	Chr4:315907-316072	0
ONG0101440	Chr1:17902033-17903367	Chr1:18077040-18078241	Chr1:17512447-17513781	Chr1:17918400-17919735	Chr1:18060969-18062170	Chr1:17450986-17452187	Chr1:17976784-17978119	Chr1:18027521-18028856	Chr1:17923980-17925180	0	Chr1:17796666-17798001	0	0	0	0	0	0	0	0	0
ONG0101450	0	Chr1:13617155-13617657	0	0	Chr1:13609124-13609627	Chr1:13487870-13488373	0	0	Chr1:13468176-13468679	0	0	0	0	0	0	0	0	0	0	0
ONG0101460	0	Chr1:14087836-14088663	0	0	Chr1:14079988-14080811	Chr1:13958710-13959537	0	0	Chr1:13938969-13939796	0	0	0	0	0	0	0	0	0	0	0
ONG1200930	Chr12:16616803-16617235	Chr12:17153080-17153511	Chr12:16679044-16679477	0	Chr12:16314560-16314990	0	0	Chr12:17093154-17093586	Chr12:16554056-16554488	0	Chr12:16291750-16292181	Chr12:17566992-17567422	0	0	0	0	0	0	0	0
ONG0301170	0	0	0	0	Chr3:31508949-31509017	0	0	0	Chr3:31359594-31359662	Chr3:30975677-30975745	Chr3:30842275-30842343	0	0	0	0	Chr3:30267310-30267378	0	0	0	0
ONG0500720	Chr5:19369569-19369886	Chr5:19335783-19336041	Chr5:19211930-19212247,WGGU01000188.1:237419-237736	Chr5:18962883-18963200	Chr5:19290051-19290368	0	0	Chr5:19088183-19088500	Chr5:19126973-19127290	0	0	0	0	0	0	0	0	0	0	0
ONG1200940	Chr12:7859455-7859554	Chr12:8041663-8041762	Chr12:7901919-7902018	0	Chr12:7714882-7714981	0	0	0	Chr12:7897989-7898088	0	0	0	0	0	0	0	0	0	0	0
ONG1200950	Chr12:22432763-22437274	Chr12:22866542-22871047	0	0	Chr12:22246493-22251003	0	0	0	Chr12:22519426-22523936	0	0	0	0	0	0	0	0	0	0	0
ONG0600930	Chr6:20917449-20917516	0	0	Chr6:21210968-21211035	Chr6:20389498-20389565	0	0	0	Chr6:20812427-20812494	0	0	0	0	0	0	0	0	0	0	0
ONG0500730	0	Chr5:7619236-7619633	Chr5:7525567-7525963	0	Chr5:7703487-7703883	0	0	Chr5:7547104-7547500	Chr5:7550100-7550496	0	0	0	0	0	0	0	0	0	0	0
ONG0301180	0	Chr3:21943521-21943946	0	0	Chr3:21557277-21557702	0	0	0	Chr3:21683607-21684033	0	0	Chr3:21407666-21408091	0	0	0	0	0	0	0	0
ONG0301190	0	Chr3:1968515-1970855	0	0	Chr3:1950044-1952378	0	0	0	Chr3:1945777-1948115	0	0	0	0	0	0	0	0	0	0	0
ONG0401050	0	0	Chr4:21505385-21505498	0	Chr4:21435131-21435244	0	0	0	Chr4:21742746-21742859	0	0	0	0	0	0	0	0	0	0	0
ONG0500740	Chr5:17080903-17081508	Chr5:17037728-17038333	Chr5:16934151-16934756	Chr5:16720465-16721070	Chr5:17015916-17016425	Chr5:17021531-17022136	Chr5:17125236-17125841	Chr5:16835907-16836512	Chr5:16831363-16831872	Chr5:17039500-17040105	Chr5:16840617-16841227	Chr5:17004488-17005093	Chr5:16617924-16618529	0	Chr5:16639148-16639753	Chr5:16748633-16749243	0	0	0	0
ONG1100990	0	0	0	0	Chr11:21025589-21046467	0	0	Chr11:21047515-21068391	Chr11:20154737-20175606	0	0	0	0	0	0	0	0	0	0	0
ONG1200960	0	Chr12:11768354-11770579	0	Chr12:12488864-12491086	Chr12:10977027-10979249	0	0	Chr12:11446133-11448359	0	Chr12:11947175-11949399	Chr12:11143047-11145271	Chr12:11827968-11830192	Chr12:11454640-11456864	0	Chr12:12018476-12020698	Chr12:11593679-11595900	0	0	0	0
ONG0401060	0	0	Chr4:17382728-17382950,WGGU01000135.1:277727-277951	0	Chr4:17186850-17187074	0	0	Chr4:17649674-17649898	0	0	Chr4:15582177-15582401	0	Chr4:15055544-15055768	0	Chr4:16064712-16064936	Chr4:15121575-15121799	0	0	Chr4:15050652-15050880	Chr4:15269533-15269757
ONG1101000	Chr11:29016970-29017501	Chr11:30198033-30198564	0	0	Chr11:30522895-30523426	Chr11:29351620-29352151	0	Chr11:30122328-30122859	0	Chr11:29164822-29165353	0	0	Chr11:28101193-28101724	0	Chr11:26228486-26228997	0	0	0	0	0
ONG0700820	0	Chr7:23401670-23402482	Chr7:22811369-22812181	Chr7:23566133-23566935	Chr7:24202162-24202974	Chr7:24044394-24045206	0	Chr7:24240569-24241381	0	0	0	Chr7:22510899-22511701	0	0	Chr7:22488506-22488821	0	Chr7:20498454-20498775	Chr7:21142279-21142600	Chr7:23006270-23007082	0
ONG0201060	0	0	0	Chr2:26203678-26203747	Chr2:26645620-26645691	Chr2:27417981-27418050	0	Chr2:26613801-26613872	0	Chr2:26680039-26680108	0	0	0	0	Chr2:25836248-25836319	Chr2:25127881-25127952	0	0	0	0
ONG1101010	0	Chr11:19308783-19311752	0	0	Chr11:19979893-19982862	Chr11:19568849-19571818	0	Chr11:19904623-19907592	0	0	0	0	Chr11:18194750-18197718	0	0	0	0	0	0	0
ONG1200970	Chr12:15856536-15856643	0	Chr12:15919469-15919576	Chr12:16788461-16788568	Chr12:15462575-15462682	0	0	0	0	0	0	Chr12:16551514-16551621	Chr12:15982302-15982409	0	0	0	0	0	0	0
ONG0600940	VXJH01000021.1:114322-114732	0	Chr6:23526177-23526587	0	Chr6:23170664-23171074	0	0	0	0	0	0	Chr6:22725944-22726354	Chr6:23085499-23085909	0	0	0	0	0	Chr6:24488412-24488822	0
ONG0600950	VXJH01000021.1:144499-146984	0	Chr6:23556363-23558843	0	Chr6:23200854-23203335	0	0	0	0	0	0	Chr6:22757865-22760361	Chr6:23117420-23119915	0	0	0	0	0	Chr6:24528990-24531448	0
ONG0600960	VXJH01000021.1:170186-170359	0	Chr6:23575807-23575980	0	Chr6:23220379-23220552	0	0	0	0	0	0	Chr6:22771586-22771745	Chr6:23131139-23131298	0	0	0	0	0	Chr6:24542627-24542785	0
ONG1101020	Chr11:30614546-30615229	0	0	0	Chr11:33216589-33217272	0	0	0	0	0	0	0	Chr11:29889579-29890262	0	0	0	0	0	0	Chr11:28019650-28020130
ONG0301200	0	0	Chr3:11710909-11711641	0	Chr3:11671509-11672242	0	0	Chr3:11660198-11660931	0	0	0	Chr3:11543876-11544608	Chr3:11632853-11633585	0	0	0	0	0	0	0
ONG0301210	0	0	Chr3:11848452-11848546	0	Chr3:11809075-11809169	0	0	Chr3:11797775-11797869	0	0	0	Chr3:11681431-11681525	Chr3:11770227-11770321	0	0	0	0	0	0	0
ONG0900700	Chr9:4571868-4571946	Chr9:4612458-4612536	WGGU01000369.1:17664-17742	Chr9:4645221-4645299	Chr9:4569364-4569442	Chr9:4566742-4566820	0	0	0	Chr9:4151421-4151499	Chr9:4276914-4276992	0	0	0	0	0	0	0	0	0
ONG0700830	0	Chr7:22962322-22962410	Chr7:22358006-22358094	0	Chr7:23760114-23760202	Chr7:23602415-23602503	0	Chr7:23800982-23801070	0	Chr7:22212560-22212648	Chr7:22061364-22061452	0	0	0	0	0	0	0	0	0
ONG1101030	0	0	Chr11:14213065-14213296	0	Chr11:14640095-14640326	Chr11:14306835-14307066	0	0	0	Chr11:13378426-13378657	Chr11:13525897-13526128	0	0	0	0	0	0	0	0	0
[truncated: 2,264 more rows]
