# Supplementary material for: Continuous infiltration and evolutionary trajectory of nuclear organelle DNA inOryza
Source: HighWire-hosted journal article supplement (doi:10.1101/gr.279609.124), 2025-04-25
Supplement: Supplemental_Table_S2.xlsx [file Supplemental_Table_S2.xlsx]

## Sheet: Supplementary Table 2
Supplemental Table 2. The organelle source of the ONGs in each accession.
Accession	ONG ID	Chromosome	Start	End	Source	Source Acc	Source Position	Source Strand	%Idendtity
AzucenaRS1	ONG0100010	Chr1	232379	232514	mtDNA	NC_011033.1	306488..306623	+	92.65
AzucenaRS1	ONG0100020	Chr1	513699	513912	ptDNA	NC_001320.1	118691..118909	-	95.43
AzucenaRS1	ONG0100030	Chr1	1913974	1914474	mtDNA	NC_011033.1	188383..188908	-	86.34
AzucenaRS1	ONG0100040	Chr1	2935716	2935985	mtDNA	NC_011033.1	248666..248939	+	95.26
AzucenaRS1	ONG0100060	Chr1	3517088	3517243	mtDNA	NC_011033.1	64258..64413	+	96.79
AzucenaRS1	ONG0100070	Chr1	3529087	3529242	mtDNA	NC_011033.1	286412..286568	+	96.82
AzucenaRS1	ONG0100070	Chr1	3529241	3529321	mtDNA	NC_011033.1	209013..209091	+	95.06
AzucenaRS1	ONG0100080	Chr1	3699402	3699546	ptDNA	NC_001320.1	21846..21983	-	92.41
AzucenaRS1	ONG0100090	Chr1	3838945	3839249	mtDNA	NC_011033.1	261768..262074	+	90.65
AzucenaRS1	ONG0100100	Chr1	4014358	4014428	mtDNA	NC_011033.1	431576..431649	-	93.24
AzucenaRS1	ONG0100110	Chr1	4242543	4242832	mtDNA	NC_011033.1	433625..433914	+	100
AzucenaRS1	ONG0100110	Chr1	4242860	4242936	mtDNA	NC_011033.1	62865..62941	+	98.7
AzucenaRS1	ONG0100110	Chr1	4242935	4243151	mtDNA	NC_011033.1	286277..286492	-	98.17
AzucenaRS1	ONG0100120	Chr1	4416248	4416408	ptDNA	NC_001320.1	112166..112332	+	85.03
AzucenaRS1	ONG0100130	Chr1	4914229	4914326	mtDNA	NC_011033.1	220514..220611	+	100
AzucenaRS1	ONG0100130	Chr1	4914327	4914444	mtDNA	NC_011033.1	307654..307771	+	99.15
AzucenaRS1	ONG0100140	Chr1	5199481	5199879	ptDNA	NC_001320.1	6536..6934	+	99
AzucenaRS1	ONG0100140	Chr1	5199880	5200308	ptDNA	NC_001320.1	42532..42965	+	97.47
AzucenaRS1	ONG0100140	Chr1	5200308	5200543	ptDNA	NC_001320.1	45519..45754	+	98.73
AzucenaRS1	ONG0100150	Chr1	5366713	5366962	ptDNA	NC_001320.1	57755..58004	-	98
AzucenaRS1	ONG0100160	Chr1	5735343	5735718	mtDNA	NC_011033.1	188219..188593	-	85.79
AzucenaRS1	ONG0100170	Chr1	5916108	5916260	ptDNA	NC_001320.1	91191..91343	-	98.69
AzucenaRS1	ONG0100180	Chr1	5922096	5922181	ptDNA	NC_001320.1	132085..132170	-	95.35
AzucenaRS1	ONG0100190	Chr1	7062785	7062868	mtDNA	NC_011033.1	325389..325472	+	95.24
AzucenaRS1	ONG0100190	Chr1	7062870	7063077	mtDNA	NC_011033.1	16637..16844	-	95.67
AzucenaRS1	ONG0100190	Chr1	7063077	7063437	mtDNA	NC_011033.1	422565..422921	-	95.29
AzucenaRS1	ONG0100200	Chr1	7493711	7494026	mtDNA	NC_011033.1	381127..381442	-	97.15
AzucenaRS1	ONG0100200	Chr1	7494025	7494134	mtDNA	NC_011033.1	195131..195240	-	96.36
AzucenaRS1	ONG0100200	Chr1	7494350	7494424	mtDNA	NC_011033.1	92563..92637	-	94.67
AzucenaRS1	ONG0100200	Chr1	7494481	7494610	mtDNA	NC_011033.1	159131..159260	+	96.92
AzucenaRS1	ONG0100200	Chr1	7494609	7494682	ptDNA	NC_001320.1	94324..94397	-	97.3
AzucenaRS1	ONG0100200	Chr1	7494682	7494797	mtDNA	NC_011033.1	408029..408144	-	96.55
AzucenaRS1	ONG0100210	Chr1	7569353	7569797	mtDNA	NC_011033.1	170664..171122	-	92.39
AzucenaRS1	ONG0100230	Chr1	8185161	8185636	mtDNA	NC_011033.1	374316..374791	-	98.32
AzucenaRS1	ONG0100240	Chr1	8429993	8430162	mtDNA	NC_011033.1	209664..209833	+	91.23
AzucenaRS1	ONG0100250	Chr1	8582155	8582303	ptDNA	NC_001320.1	59474..59624	-	86.75
AzucenaRS1	ONG0100260	Chr1	9147200	9147383	mtDNA	NC_011033.1	202495..202678	-	95.11
AzucenaRS1	ONG0100270	Chr1	9787964	9788302	ptDNA	NC_001320.1	43490..43829	+	96.21
AzucenaRS1	ONG0100280	Chr1	10149158	10149298	mtDNA	NC_011033.1	364528..364668	+	98.58
AzucenaRS1	ONG0100290	Chr1	11468285	11468488	mtDNA	NC_011033.1	246239..246443	+	97.07
AzucenaRS1	ONG0100300	Chr1	11695039	11695273	ptDNA	NC_001320.1	5683..5937	+	85.49
AzucenaRS1	ONG0100310	Chr1	12646161	12646585	ptDNA	NC_001320.1	89198..89623	-	94.13
AzucenaRS1	ONG0100310	Chr1	12646161	12646585	ptDNA	NC_001320.1	125495..125920	+	94.13
AzucenaRS1	ONG0100320	Chr1	12703014	12703112	mtDNA	NC_011033.1	399850..399948	-	95.96
AzucenaRS1	ONG0100330	Chr1	12868306	12868438	mtDNA	NC_011033.1	57803..57935	-	99.25
AzucenaRS1	ONG0100340	Chr1	13114811	13114874	ptDNA	NC_001320.1	11817..11882	+	95.45
AzucenaRS1	ONG0100350	Chr1	13204964	13205021	ptDNA	NC_001320.1	133350..133407	-	98.28
AzucenaRS1	ONG0100350	Chr1	13206222	13206617	mtDNA	NC_011033.1	125693..126094	-	94.28
AzucenaRS1	ONG0100360	Chr1	14261738	14262039	ptDNA	NC_001320.1	103022..103315	+	86.14
AzucenaRS1	ONG0100370	Chr1	14591106	14593664	ptDNA	NC_001320.1	51626..54167	+	97.23
AzucenaRS1	ONG0100370	Chr1	14593662	14593999	ptDNA	NC_001320.1	67854..68193	-	96.18
AzucenaRS1	ONG0100380	Chr1	15252531	15252620	mtDNA	NC_011033.1	235502..235591	+	98.89
AzucenaRS1	ONG0100390	Chr1	15537061	15537347	mtDNA	NC_011033.1	290807..291093	+	98.61
AzucenaRS1	ONG0100400	Chr1	16210789	16210919	mtDNA	NC_011033.1	349773..349903	+	94.66
AzucenaRS1	ONG0100410	Chr1	16323187	16323274	mtDNA	NC_011033.1	252083..252170	-	98.86
AzucenaRS1	ONG0100410	Chr1	16323364	16323454	mtDNA	NC_011033.1	309434..309524	-	95.6
AzucenaRS1	ONG0100420	Chr1	17091671	17091846	ptDNA	NC_001320.1	119257..119432	+	98.86
AzucenaRS1	ONG0100420	Chr1	17091847	17091919	ptDNA	NC_001320.1	35827..35899	-	98.63
AzucenaRS1	ONG0100430	Chr1	17657573	17657976	ptDNA	NC_001320.1	60690..61088	+	98.27
AzucenaRS1	ONG0100440	Chr1	18065935	18066159	mtDNA	NC_011033.1	163568..163849	+	74.2
AzucenaRS1	ONG0100450	Chr1	18072441	18072943	ptDNA	NC_001320.1	79195..79697	+	96.83
AzucenaRS1	ONG0100460	Chr1	18652369	18652564	ptDNA	NC_001320.1	69141..69336	-	90.36
AzucenaRS1	ONG0100470	Chr1	19061527	19061584	mtDNA	NC_011033.1	395412..395468	-	96.55
AzucenaRS1	ONG0100480	Chr1	19129392	19129669	ptDNA	NC_001320.1	4135..4435	+	84.49
AzucenaRS1	ONG0100490	Chr1	19271117	19271176	mtDNA	NC_011033.1	234875..234934	+	98.33
AzucenaRS1	ONG0100490	Chr1	19271173	19271276	mtDNA	NC_011033.1	198859..198962	-	97.12
AzucenaRS1	ONG0100490	Chr1	19271275	19271347	mtDNA	NC_011033.1	220007..220079	-	100
AzucenaRS1	ONG0100500	Chr1	19323476	19323561	mtDNA	NC_011033.1	313221..313306	+	98.84
AzucenaRS1	ONG0100500	Chr1	19323560	19325112	ptDNA	NC_001320.1	127785..129338	-	99.03
AzucenaRS1	ONG0100500	Chr1	19328534	19328884	ptDNA	NC_001320.1	127438..127790	-	98.3
AzucenaRS1	ONG0100500	Chr1	19328886	19329127	mtDNA	NC_011033.1	355841..356082	-	99.59
AzucenaRS1	ONG0100500	Chr1	19329126	19329263	mtDNA	NC_011033.1	211015..211151	+	97.83
AzucenaRS1	ONG0100500	Chr1	19329260	19329479	mtDNA	NC_011033.1	384867..385086	-	98.64
AzucenaRS1	ONG0100500	Chr1	19329479	19329845	mtDNA	NC_011033.1	373972..374338	+	99.46
AzucenaRS1	ONG0100500	Chr1	19329845	19329920	mtDNA	NC_011033.1	240603..240678	+	96.05
AzucenaRS1	ONG0100500	Chr1	19329920	19330324	mtDNA	NC_011033.1	241431..241835	+	99.51
AzucenaRS1	ONG0100500	Chr1	19330337	19330813	mtDNA	NC_011033.1	288390..288866	+	100
AzucenaRS1	ONG0100500	Chr1	19330814	19331082	mtDNA	NC_011033.1	382205..382473	+	99.63
AzucenaRS1	ONG0100500	Chr1	19331083	19331328	mtDNA	NC_011033.1	257892..258137	-	99.19
AzucenaRS1	ONG0100500	Chr1	19331329	19331848	mtDNA	NC_011033.1	269110..269629	+	99.04
AzucenaRS1	ONG0100500	Chr1	19331849	19332669	mtDNA	NC_011033.1	300809..301629	+	99.88
AzucenaRS1	ONG0100500	Chr1	19332668	19332830	mtDNA	NC_011033.1	396643..396805	+	99.39
AzucenaRS1	ONG0100500	Chr1	19332831	19333026	mtDNA	NC_011033.1	180946..181141	+	99.49
AzucenaRS1	ONG0100500	Chr1	19333199	19333349	mtDNA	NC_011033.1	227447..227597	-	100
AzucenaRS1	ONG0100500	Chr1	19333346	19333477	mtDNA	NC_011033.1	174790..174921	-	99.24
AzucenaRS1	ONG0100500	Chr1	19333479	19333753	mtDNA	NC_011033.1	134742..135016	-	99.27
AzucenaRS1	ONG0100500	Chr1	19333753	19334133	ptDNA	NC_001320.1	65772..66152	+	99.21
AzucenaRS1	ONG0100500	Chr1	19334133	19334422	mtDNA	NC_011033.1	332891..333180	+	98.62
AzucenaRS1	ONG0100500	Chr1	19334425	19334507	mtDNA	NC_011033.1	198162..198244	+	100
AzucenaRS1	ONG0100500	Chr1	19334509	19334639	mtDNA	NC_011033.1	400202..400332	+	97.71
AzucenaRS1	ONG0100500	Chr1	19334639	19334849	mtDNA	NC_011033.1	195079..195290	-	97.64
AzucenaRS1	ONG0100500	Chr1	19334850	19334983	mtDNA	NC_011033.1	350508..350641	+	99.25
AzucenaRS1	ONG0100500	Chr1	19334985	19335117	mtDNA	NC_011033.1	155579..155711	+	98.5
AzucenaRS1	ONG0100500	Chr1	19335118	19335490	mtDNA	NC_011033.1	65498..65870	-	98.93
AzucenaRS1	ONG0100500	Chr1	19335487	19335705	mtDNA	NC_011033.1	205600..205819	-	98.64
AzucenaRS1	ONG0100500	Chr1	19335705	19335868	mtDNA	NC_011033.1	170777..170940	+	98.78
AzucenaRS1	ONG0100500	Chr1	19333028	19333198	mtDNA	NC_011033.1	183672..183842	-	99.42
AzucenaRS1	ONG0100510	Chr1	19472651	19472868	mtDNA	NC_011033.1	105603..105820	+	98.62
AzucenaRS1	ONG0100510	Chr1	19472867	19472936	ptDNA	NC_001320.1	19839..19908	-	98.57
AzucenaRS1	ONG0100520	Chr1	19578672	19578753	mtDNA	NC_011033.1	178516..178600	+	89.41
AzucenaRS1	ONG0100530	Chr1	19641223	19641313	ptDNA	NC_001320.1	63342..63433	+	97.83
AzucenaRS1	ONG0100530	Chr1	19642418	19643431	ptDNA	NC_001320.1	63433..64447	+	97.06
AzucenaRS1	ONG0100540	Chr1	20114765	20114871	mtDNA	NC_011033.1	228777..228883	+	95.33
AzucenaRS1	ONG0100550	Chr1	21074780	21079317	ptDNA	NC_001320.1	56717..61317	+	96.81
AzucenaRS1	ONG0100550	Chr1	21080389	21081059	ptDNA	NC_001320.1	61311..61982	+	98.51
AzucenaRS1	ONG0100560	Chr1	22339198	22339385	mtDNA	NC_011033.1	71172..71359	+	93.62
AzucenaRS1	ONG0100570	Chr1	23217320	23217643	mtDNA	NC_011033.1	79249..79569	+	94.79
AzucenaRS1	ONG0100570	Chr1	23217652	23218008	mtDNA	NC_011033.1	162362..162709	+	91.6
AzucenaRS1	ONG0100570	Chr1	23218039	23218282	mtDNA	NC_011033.1	71240..71483	-	97.13
AzucenaRS1	ONG0100570	Chr1	23220057	23220375	mtDNA	NC_011033.1	79249..79567	+	96.24
AzucenaRS1	ONG0100570	Chr1	23220371	23220754	mtDNA	NC_011033.1	162325..162709	+	97.4
AzucenaRS1	ONG0100570	Chr1	23220785	23221027	mtDNA	NC_011033.1	71241..71483	-	94.65
AzucenaRS1	ONG0100580	Chr1	23447659	23447849	mtDNA	NC_011033.1	104152..104343	+	96.88
AzucenaRS1	ONG0100590	Chr1	23575685	23575762	mtDNA	NC_011033.1	239460..239537	-	97.44
AzucenaRS1	ONG0100600	Chr1	23778583	23778947	mtDNA	NC_011033.1	137959..138323	-	97.26
AzucenaRS1	ONG0100610	Chr1	24301400	24301701	ptDNA	NC_001320.1	3517..3829	-	90.45
AzucenaRS1	ONG0100620	Chr1	24445763	24446099	ptDNA	NC_001320.1	88486..88843	-	83.38
AzucenaRS1	ONG0100620	Chr1	24445763	24446099	ptDNA	NC_001320.1	126275..126632	+	83.38
AzucenaRS1	ONG0100630	Chr1	24858247	24858331	mtDNA	NC_011033.1	378671..378755	-	92.94
AzucenaRS1	ONG0100640	Chr1	24911958	24912043	ptDNA	NC_001320.1	53590..53674	-	95.35
AzucenaRS1	ONG0100650	Chr1	25096135	25096219	mtDNA	NC_011033.1	163956..164040	-	92.94
AzucenaRS1	ONG0100660	Chr1	25423439	25423841	mtDNA	NC_011033.1	271556..271958	+	98.01
AzucenaRS1	ONG0100660	Chr1	25423842	25424181	mtDNA	NC_011033.1	203419..203757	+	96.48
AzucenaRS1	ONG0100670	Chr1	25523339	25523570	ptDNA	NC_001320.1	23130..23366	-	90.3
AzucenaRS1	ONG0100680	Chr1	25595889	25595962	mtDNA	NC_011033.1	135026..135099	-	100
AzucenaRS1	ONG0100690	Chr1	25602775	25603083	ptDNA	NC_001320.1	131189..131494	+	92.28
AzucenaRS1	ONG0100700	Chr1	27020606	27020796	ptDNA	NC_001320.1	109427..109617	-	92.67
AzucenaRS1	ONG0100710	Chr1	27334171	27334295	mtDNA	NC_011033.1	175947..176071	+	99.2
AzucenaRS1	ONG0100720	Chr1	27902097	27902232	ptDNA	NC_001320.1	65221..65356	+	94.85
AzucenaRS1	ONG0100730	Chr1	28390717	28390796	mtDNA	NC_011033.1	216217..216298	-	96.34
AzucenaRS1	ONG0100740	Chr1	28531059	28531672	mtDNA	NC_011033.1	96084..96697	+	93.03
AzucenaRS1	ONG0100750	Chr1	28800537	28800690	mtDNA	NC_011033.1	319490..319643	+	99.35
AzucenaRS1	ONG0100760	Chr1	29065251	29065824	mtDNA	NC_011033.1	381780..382353	+	99.3
AzucenaRS1	ONG0100770	Chr1	29098397	29098735	ptDNA	NC_001320.1	132162..132499	-	97.64
AzucenaRS1	ONG0100790	Chr1	29374326	29374378	mtDNA	NC_011033.1	368797..368849	-	100
AzucenaRS1	ONG0100790	Chr1	29374379	29374441	mtDNA	NC_011033.1	261848..261910	+	100
AzucenaRS1	ONG0100800	Chr1	29506557	29506672	mtDNA	NC_011033.1	278897..279014	+	88.33
AzucenaRS1	ONG0100810	Chr1	30404455	30404666	mtDNA	NC_011033.1	342832..343043	+	94.34
AzucenaRS1	ONG0100820	Chr1	30761344	30761700	ptDNA	NC_001320.1	54069..54426	-	85.48
AzucenaRS1	ONG0100830	Chr1	30822002	30822083	mtDNA	NC_011033.1	167966..168047	-	98.78
AzucenaRS1	ONG0100840	Chr1	31460230	31460500	ptDNA	NC_001320.1	43757..44046	+	86.94
AzucenaRS1	ONG0100840	Chr1	31460696	31460932	ptDNA	NC_001320.1	44048..44289	+	92.56
AzucenaRS1	ONG0100850	Chr1	32657794	32657898	mtDNA	NC_011033.1	206294..206398	+	100
AzucenaRS1	ONG0100850	Chr1	32657960	32658036	mtDNA	NC_011033.1	283653..283729	+	98.7
AzucenaRS1	ONG0100850	Chr1	32658071	32658188	mtDNA	NC_011033.1	278349..278466	+	99.15
AzucenaRS1	ONG0100860	Chr1	33465821	33465883	ptDNA	NC_001320.1	98917..98979	+	98.41
AzucenaRS1	ONG0100860	Chr1	33465883	33465982	ptDNA	NC_001320.1	67008..67107	+	95
AzucenaRS1	ONG0100860	Chr1	33465981	33466068	ptDNA	NC_001320.1	38396..38482	-	98.86
AzucenaRS1	ONG0100860	Chr1	33466066	33466183	ptDNA	NC_001320.1	92039..92156	+	95.76
AzucenaRS1	ONG0100860	Chr1	33466185	33466293	ptDNA	NC_001320.1	95700..95808	-	97.25
AzucenaRS1	ONG0100860	Chr1	33466293	33466410	ptDNA	NC_001320.1	90683..90800	-	97.46
AzucenaRS1	ONG0100860	Chr1	33466410	33466491	mtDNA	NC_011033.1	213263..213345	-	96.39
AzucenaRS1	ONG0100860	Chr1	33466488	33466584	mtDNA	NC_011033.1	214741..214837	+	100
AzucenaRS1	ONG0100860	Chr1	33466584	33466662	mtDNA	NC_011033.1	74908..74986	+	96.2
AzucenaRS1	ONG0100860	Chr1	33466747	33466885	ptDNA	NC_001320.1	92695..92834	+	97.86
AzucenaRS1	ONG0100870	Chr1	33740702	33740777	mtDNA	NC_011033.1	67276..67351	+	100
AzucenaRS1	ONG0100870	Chr1	33740948	33741048	mtDNA	NC_011033.1	350936..351036	+	99.01
AzucenaRS1	ONG0100870	Chr1	33741048	33741132	ptDNA	NC_001320.1	116490..116574	-	98.82
AzucenaRS1	ONG0100880	Chr1	33828094	33828205	mtDNA	NC_011033.1	298275..298386	-	99.11
AzucenaRS1	ONG0100890	Chr1	34223474	34223647	ptDNA	NC_001320.1	94592..94765	-	98.85
AzucenaRS1	ONG0100890	Chr1	34230583	34230923	ptDNA	NC_001320.1	13082..13422	+	100
AzucenaRS1	ONG0100890	Chr1	34230961	34231840	ptDNA	NC_001320.1	15422..16301	-	100
AzucenaRS1	ONG0100890	Chr1	34231845	34232689	mtDNA	NC_011033.1	380197..381041	+	99.76
AzucenaRS1	ONG0100890	Chr1	34234992	34236741	ptDNA	NC_001320.1	13668..15418	-	99.49
AzucenaRS1	ONG0100890	Chr1	34236778	34237518	ptDNA	NC_001320.1	120908..121648	-	99.87
AzucenaRS1	ONG0100890	Chr1	34237514	34238333	ptDNA	NC_001320.1	121633..122446	+	98.9
AzucenaRS1	ONG0100890	Chr1	34238327	34241898	ptDNA	NC_001320.1	21960..25531	+	99.83
AzucenaRS1	ONG0100890	Chr1	34248200	34255742	ptDNA	NC_001320.1	36762..44314	+	99.52
AzucenaRS1	ONG0100890	Chr1	34259403	34259480	ptDNA	NC_001320.1	55890..55967	-	100
AzucenaRS1	ONG0100890	Chr1	34259476	34260331	ptDNA	NC_001320.1	54737..55592	-	99.88
AzucenaRS1	ONG0100890	Chr1	34260328	34265314	mtDNA	NC_011033.1	364374..369361	-	99.96
AzucenaRS1	ONG0100890	Chr1	34265315	34266838	ptDNA	NC_001320.1	51114..52637	+	99.93
AzucenaRS1	ONG0100890	Chr1	34266884	34269182	ptDNA	NC_001320.1	84793..87091	-	99.87
AzucenaRS1	ONG0100890	Chr1	34269275	34269469	ptDNA	NC_001320.1	107036..107230	+	100
AzucenaRS1	ONG0100890	Chr1	34269470	34270294	mtDNA	NC_011033.1	379188..380012	+	99.88
AzucenaRS1	ONG0100890	Chr1	34270295	34275028	ptDNA	NC_001320.1	52356..57075	+	99.22
AzucenaRS1	ONG0100890	Chr1	34286743	34289159	ptDNA	NC_001320.1	85927..88347	-	99.5
AzucenaRS1	ONG0100890	Chr1	34289233	34289568	ptDNA	NC_001320.1	52772..53107	+	100
AzucenaRS1	ONG0100890	Chr1	34295807	34297621	ptDNA	NC_001320.1	55827..57651	+	98.31
AzucenaRS1	ONG0100890	Chr1	34300796	34302231	ptDNA	NC_001320.1	57647..59079	+	99.65
AzucenaRS1	ONG0100890	Chr1	34302231	34303750	ptDNA	NC_001320.1	124985..126504	-	99.54
AzucenaRS1	ONG0100890	Chr1	34303768	34305136	ptDNA	NC_001320.1	127143..128516	-	99.42
AzucenaRS1	ONG0100890	Chr1	34310352	34312493	ptDNA	NC_001320.1	115528..117666	-	99.63
AzucenaRS1	ONG0100890	Chr1	34223640	34230551	ptDNA	NC_001320.1	71460..78370	+	99.6
AzucenaRS1	ONG0100890	Chr1	34241897	34248152	mtDNA	NC_011033.1	358087..364342	+	99.94
AzucenaRS1	ONG0100890	Chr1	34257594	34259365	ptDNA	NC_001320.1	94773..96544	+	99.94
AzucenaRS1	ONG0100890	Chr1	34274964	34286741	ptDNA	NC_001320.1	45314..57075	-	99.57
AzucenaRS1	ONG0100890	Chr1	34289566	34295807	ptDNA	NC_001320.1	8101..14346	+	99.65
AzucenaRS1	ONG0100890	Chr1	34305134	34310262	mtDNA	NC_011033.1	382638..387766	-	99.92
AzucenaRS1	ONG0100900	Chr1	34434185	34434430	ptDNA	NC_001320.1	52749..52995	-	97.98
AzucenaRS1	ONG0100910	Chr1	34850845	34851005	ptDNA	NC_001320.1	2133..2293	-	95.03
AzucenaRS1	ONG0100920	Chr1	35080452	35080520	mtDNA	NC_011033.1	238463..238531	+	100
AzucenaRS1	ONG0100920	Chr1	35080513	35080661	mtDNA	NC_011033.1	184325..184471	+	98.66
AzucenaRS1	ONG0100920	Chr1	35080662	35080761	mtDNA	NC_011033.1	115268..115367	+	100
AzucenaRS1	ONG0100920	Chr1	35080759	35080848	mtDNA	NC_011033.1	49279..49368	-	98.89
AzucenaRS1	ONG0100920	Chr1	35080875	35081080	mtDNA	NC_011033.1	94931..95136	-	99.51
AzucenaRS1	ONG0100920	Chr1	35081080	35081217	mtDNA	NC_011033.1	116846..116984	+	99.28
AzucenaRS1	ONG0100920	Chr1	35081447	35081499	mtDNA	NC_011033.1	182614..182666	-	100
AzucenaRS1	ONG0100920	Chr1	35081535	35081598	mtDNA	NC_011033.1	202429..202492	-	100
AzucenaRS1	ONG0100920	Chr1	35081597	35081672	mtDNA	NC_011033.1	273871..273946	+	100
AzucenaRS1	ONG0100920	Chr1	35081668	35081717	mtDNA	NC_011033.1	342208..342257	-	100
AzucenaRS1	ONG0100920	Chr1	35081718	35081780	mtDNA	NC_011033.1	327233..327295	+	98.41
AzucenaRS1	ONG0100920	Chr1	35081779	35081903	mtDNA	NC_011033.1	185227..185351	-	100
AzucenaRS1	ONG0100920	Chr1	35081944	35082006	mtDNA	NC_011033.1	210064..210125	+	96.83
AzucenaRS1	ONG0100920	Chr1	35082007	35082144	mtDNA	NC_011033.1	121747..121884	-	100
AzucenaRS1	ONG0100920	Chr1	35082241	35082336	ptDNA	NC_001320.1	80652..80747	+	97.92
AzucenaRS1	ONG0100920	Chr1	35082334	35082434	mtDNA	NC_011033.1	73168..73268	-	100
AzucenaRS1	ONG0100920	Chr1	35082479	35082559	ptDNA	NC_001320.1	40558..40638	-	100
AzucenaRS1	ONG0100920	Chr1	35082588	35082667	mtDNA	NC_011033.1	75655..75734	+	98.75
AzucenaRS1	ONG0100920	Chr1	35082701	35082751	mtDNA	NC_011033.1	324045..324095	-	98.04
AzucenaRS1	ONG0100920	Chr1	35082752	35082818	ptDNA	NC_001320.1	123541..123607	+	98.51
AzucenaRS1	ONG0100920	Chr1	35082818	35082900	mtDNA	NC_011033.1	230311..230393	-	100
AzucenaRS1	ONG0100920	Chr1	35082901	35082998	mtDNA	NC_011033.1	274241..274341	-	95.05
AzucenaRS1	ONG0100920	Chr1	35083131	35083237	mtDNA	NC_011033.1	465504..465610	+	99.07
AzucenaRS1	ONG0100920	Chr1	35083338	35083423	mtDNA	NC_011033.1	50668..50753	+	100
AzucenaRS1	ONG0100920	Chr1	35083473	35083540	mtDNA	NC_011033.1	313145..313212	-	100
AzucenaRS1	ONG0100920	Chr1	35083539	35083613	mtDNA	NC_011033.1	266448..266522	-	98.67
AzucenaRS1	ONG0100920	Chr1	35083664	35083752	mtDNA	NC_011033.1	248558..248646	+	100
AzucenaRS1	ONG0100920	Chr1	35083751	35083856	mtDNA	NC_011033.1	406833..406938	+	99.06
AzucenaRS1	ONG0100920	Chr1	35083886	35083965	mtDNA	NC_011033.1	262391..262470	-	97.5
AzucenaRS1	ONG0100920	Chr1	35083966	35084037	mtDNA	NC_011033.1	282346..282417	+	100
AzucenaRS1	ONG0100920	Chr1	35084075	35084124	mtDNA	NC_011033.1	349203..349252	+	100
AzucenaRS1	ONG0100920	Chr1	35084125	35084179	mtDNA	NC_011033.1	295101..295155	-	100
AzucenaRS1	ONG0100920	Chr1	35084314	35084404	mtDNA	NC_011033.1	316431..316521	-	97.8
AzucenaRS1	ONG0100920	Chr1	35084400	35084478	mtDNA	NC_011033.1	132499..132577	-	100
AzucenaRS1	ONG0100920	Chr1	35084474	35084549	mtDNA	NC_011033.1	130235..130310	+	97.4
AzucenaRS1	ONG0100920	Chr1	35084537	35084654	mtDNA	NC_011033.1	155115..155232	-	100
AzucenaRS1	ONG0100920	Chr1	35084650	35084708	mtDNA	NC_011033.1	222588..222646	+	100
AzucenaRS1	ONG0100920	Chr1	35084710	35084844	mtDNA	NC_011033.1	182682..182816	-	99.26
AzucenaRS1	ONG0100920	Chr1	35084844	35084924	mtDNA	NC_011033.1	160738..160817	-	96.3
AzucenaRS1	ONG0100920	Chr1	35085026	35085077	mtDNA	NC_011033.1	353560..353611	-	100
AzucenaRS1	ONG0100920	Chr1	35085076	35085127	mtDNA	NC_011033.1	273515..273566	+	100
AzucenaRS1	ONG0100920	Chr1	35085128	35085214	mtDNA	NC_011033.1	193970..194056	-	98.85
AzucenaRS1	ONG0100920	Chr1	35085283	35085349	mtDNA	NC_011033.1	78737..78803	-	98.51
AzucenaRS1	ONG0100920	Chr1	35085453	35085503	mtDNA	NC_011033.1	186745..186795	+	100
AzucenaRS1	ONG0100920	Chr1	35085565	35085658	mtDNA	NC_011033.1	349607..349700	+	98.94
AzucenaRS1	ONG0100920	Chr1	35085659	35085765	mtDNA	NC_011033.1	277784..277890	-	100
AzucenaRS1	ONG0100920	Chr1	35085800	35085855	mtDNA	NC_011033.1	354219..354274	+	100
AzucenaRS1	ONG0100920	Chr1	35085857	35085939	mtDNA	NC_011033.1	393532..393614	-	98.8
AzucenaRS1	ONG0100920	Chr1	35085938	35086179	mtDNA	NC_011033.1	158..399	+	99.59
AzucenaRS1	ONG0100920	Chr1	35086178	35086242	mtDNA	NC_011033.1	307538..307602	+	100
AzucenaRS1	ONG0100920	Chr1	35086242	35086340	mtDNA	NC_011033.1	329709..329807	+	96.97
AzucenaRS1	ONG0100920	Chr1	35086340	35086444	mtDNA	NC_011033.1	167786..167889	-	99.05
AzucenaRS1	ONG0100920	Chr1	35086439	35086634	mtDNA	NC_011033.1	195950..196145	+	96.94
AzucenaRS1	ONG0100930	Chr1	35215914	35215998	mtDNA	NC_011033.1	169933..170017	+	98.82
AzucenaRS1	ONG0100940	Chr1	35320355	35320439	mtDNA	NC_011033.1	364689..364773	-	97.65
AzucenaRS1	ONG0100950	Chr1	36129759	36130130	ptDNA	NC_001320.1	100539..100910	+	99.19
AzucenaRS1	ONG0100960	Chr1	36243750	36243932	ptDNA	NC_001320.1	57555..57811	+	69.65
AzucenaRS1	ONG0100960	Chr1	36243934	36243998	ptDNA	NC_001320.1	57781..57845	+	100
AzucenaRS1	ONG0100960	Chr1	36244030	36244146	ptDNA	NC_001320.1	57730..57846	+	99.15
AzucenaRS1	ONG0100970	Chr1	36381467	36381575	mtDNA	NC_011033.1	287618..287726	+	100
AzucenaRS1	ONG0100980	Chr1	37421480	37421717	ptDNA	NC_001320.1	7183..7420	-	99.58
AzucenaRS1	ONG0100990	Chr1	37685199	37685483	ptDNA	NC_001320.1	126917..127197	-	89.55
AzucenaRS1	ONG0100990	Chr1	37685484	37685566	ptDNA	NC_001320.1	126908..126992	-	94.12
AzucenaRS1	ONG0101000	Chr1	38365050	38365093	mtDNA	NC_011033.1	165782..165824	+	97.73
AzucenaRS1	ONG0101010	Chr1	38938199	38941759	ptDNA	NC_001320.1	58937..62500	-	99.89
AzucenaRS1	ONG0101020	Chr1	39050496	39050824	mtDNA	NC_011033.1	179577..179905	-	97.57
AzucenaRS1	ONG0101030	Chr1	39703870	39704047	mtDNA	NC_011033.1	54330..54506	-	98.88
AzucenaRS1	ONG0101040	Chr1	39779387	39779490	mtDNA	NC_011033.1	161781..161884	-	100
AzucenaRS1	ONG0101040	Chr1	39779492	39779669	mtDNA	NC_011033.1	267618..267794	-	99.44
AzucenaRS1	ONG0101040	Chr1	39779668	39779803	mtDNA	NC_011033.1	330051..330186	+	100
AzucenaRS1	ONG0101040	Chr1	39779841	39779960	mtDNA	NC_011033.1	263177..263296	-	98.33
AzucenaRS1	ONG0101040	Chr1	39779961	39780296	mtDNA	NC_011033.1	385796..386131	-	100
AzucenaRS1	ONG0101040	Chr1	39780761	39780939	mtDNA	NC_011033.1	221484..221662	-	100
AzucenaRS1	ONG0101040	Chr1	39780940	39781062	mtDNA	NC_011033.1	134822..134944	-	100
AzucenaRS1	ONG0101040	Chr1	39781062	39781213	ptDNA	NC_001320.1	90548..90700	+	98.69
AzucenaRS1	ONG0101040	Chr1	39781213	39781926	mtDNA	NC_011033.1	220755..221467	+	98.88
AzucenaRS1	ONG0101040	Chr1	39781927	39782052	mtDNA	NC_011033.1	192700..192825	+	99.21
AzucenaRS1	ONG0101040	Chr1	39782054	39782385	mtDNA	NC_011033.1	103426..103757	-	99.7
AzucenaRS1	ONG0101040	Chr1	39782416	39782513	mtDNA	NC_011033.1	388337..388434	+	97.96
AzucenaRS1	ONG0101040	Chr1	39782513	39782611	mtDNA	NC_011033.1	76527..76625	+	100
AzucenaRS1	ONG0101040	Chr1	39782610	39782673	mtDNA	NC_011033.1	337855..337918	-	100
AzucenaRS1	ONG0101040	Chr1	39782673	39782870	mtDNA	NC_011033.1	324516..324713	-	99.49
AzucenaRS1	ONG0101040	Chr1	39782870	39783006	mtDNA	NC_011033.1	257789..257925	-	100
AzucenaRS1	ONG0101040	Chr1	39783002	39783208	mtDNA	NC_011033.1	285397..285603	-	99.03
AzucenaRS1	ONG0101040	Chr1	39783210	39783559	mtDNA	NC_011033.1	188616..188965	+	98.86
AzucenaRS1	ONG0101040	Chr1	39783561	39783642	mtDNA	NC_011033.1	419383..419464	-	98.78
AzucenaRS1	ONG0101040	Chr1	39783641	39783730	mtDNA	NC_011033.1	320339..320428	+	100
AzucenaRS1	ONG0101040	Chr1	39783730	39784169	mtDNA	NC_011033.1	179116..179555	+	99.32
AzucenaRS1	ONG0101040	Chr1	39784168	39784286	mtDNA	NC_011033.1	399276..399394	-	100
AzucenaRS1	ONG0101040	Chr1	39784418	39784670	mtDNA	NC_011033.1	292128..292380	-	99.21
AzucenaRS1	ONG0101040	Chr1	39784670	39785161	mtDNA	NC_011033.1	9872..10363	+	98.78
AzucenaRS1	ONG0101040	Chr1	39785165	39785306	mtDNA	NC_011033.1	330045..330186	+	98.59
AzucenaRS1	ONG0101040	Chr1	39785344	39785463	mtDNA	NC_011033.1	263177..263296	-	99.17
AzucenaRS1	ONG0101040	Chr1	39785470	39785871	mtDNA	NC_011033.1	300743..301144	-	99.25
AzucenaRS1	ONG0101040	Chr1	39785874	39786296	mtDNA	NC_011033.1	212192..212615	+	98.82
AzucenaRS1	ONG0101040	Chr1	39786296	39786478	ptDNA	NC_001320.1	35055..35237	-	99.45
AzucenaRS1	ONG0101040	Chr1	39786476	39786689	mtDNA	NC_011033.1	162345..162558	-	99.53
AzucenaRS1	ONG0101040	Chr1	39786689	39786820	mtDNA	NC_011033.1	406722..406853	+	100
AzucenaRS1	ONG0101040	Chr1	39786906	39787317	mtDNA	NC_011033.1	486392..486803	-	99.76
AzucenaRS1	ONG0101040	Chr1	39787322	39787652	mtDNA	NC_011033.1	4248..4578	-	98.49
AzucenaRS1	ONG0101040	Chr1	39787653	39787850	mtDNA	NC_011033.1	26977..27174	-	100
AzucenaRS1	ONG0101040	Chr1	39787846	39787924	mtDNA	NC_011033.1	57560..57638	-	100
AzucenaRS1	ONG0101040	Chr1	39787927	39787995	mtDNA	NC_011033.1	17193..17261	-	98.55
AzucenaRS1	ONG0101040	Chr1	39787990	39788126	mtDNA	NC_011033.1	417301..417437	-	99.27
AzucenaRS1	ONG0101040	Chr1	39788126	39788208	mtDNA	NC_011033.1	476304..476386	+	100
AzucenaRS1	ONG0101040	Chr1	39788264	39788511	mtDNA	NC_011033.1	435392..435639	-	99.19
AzucenaRS1	ONG0101040	Chr1	39788497	39788670	mtDNA	NC_011033.1	328604..328778	-	97.71
AzucenaRS1	ONG0101040	Chr1	39788670	39789056	mtDNA	NC_011033.1	313788..314174	+	98.71
AzucenaRS1	ONG0101040	Chr1	39789056	39789290	mtDNA	NC_011033.1	205814..206048	+	98.3
AzucenaRS1	ONG0101040	Chr1	39789374	39789466	mtDNA	NC_011033.1	221574..221666	+	100
AzucenaRS1	ONG0101040	Chr1	39789464	39789778	mtDNA	NC_011033.1	168950..169264	-	99.37
AzucenaRS1	ONG0101040	Chr1	39789779	39789867	ptDNA	NC_001320.1	55814..55902	-	98.88
AzucenaRS1	ONG0101040	Chr1	39789862	39790035	mtDNA	NC_011033.1	68275..68448	+	98.85
AzucenaRS1	ONG0101040	Chr1	39790036	39790405	mtDNA	NC_011033.1	370910..371278	+	99.46
AzucenaRS1	ONG0101040	Chr1	39790405	39790503	ptDNA	NC_001320.1	59756..59854	+	100
AzucenaRS1	ONG0101040	Chr1	39790504	39790593	mtDNA	NC_011033.1	199805..199894	+	96.67
AzucenaRS1	ONG0101040	Chr1	39790593	39790669	ptDNA	NC_001320.1	37254..37330	-	98.7
AzucenaRS1	ONG0101040	Chr1	39790670	39790968	mtDNA	NC_011033.1	123897..124195	+	99
AzucenaRS1	ONG0101040	Chr1	39791003	39791338	mtDNA	NC_011033.1	211908..212243	+	97.92
AzucenaRS1	ONG0101040	Chr1	39791340	39791468	mtDNA	NC_011033.1	220254..220382	+	100
AzucenaRS1	ONG0101040	Chr1	39791469	39791586	ptDNA	NC_001320.1	34411..34528	-	99.15
AzucenaRS1	ONG0101040	Chr1	39791590	39791862	mtDNA	NC_011033.1	202985..203257	-	99.63
AzucenaRS1	ONG0101040	Chr1	39791863	39791979	mtDNA	NC_011033.1	68319..68435	+	100
AzucenaRS1	ONG0101040	Chr1	39791980	39792030	mtDNA	NC_011033.1	43216..43266	+	98.04
AzucenaRS1	ONG0101040	Chr1	39792049	39792108	ptDNA	NC_001320.1	91596..91655	+	98.33
AzucenaRS1	ONG0101040	Chr1	39792107	39792394	mtDNA	NC_011033.1	77940..78227	-	99.31
AzucenaRS1	ONG0101040	Chr1	39792438	39792592	mtDNA	NC_011033.1	391513..391667	+	98.71
AzucenaRS1	ONG0101040	Chr1	39792593	39792894	mtDNA	NC_011033.1	184463..184764	-	100
AzucenaRS1	ONG0101040	Chr1	39792894	39793033	mtDNA	NC_011033.1	172685..172823	+	99.29
AzucenaRS1	ONG0101040	Chr1	39793121	39793431	mtDNA	NC_011033.1	74761..75071	-	99.36
AzucenaRS1	ONG0101040	Chr1	39793432	39793668	mtDNA	NC_011033.1	235431..235667	-	99.16
AzucenaRS1	ONG0101040	Chr1	39793668	39793719	mtDNA	NC_011033.1	53237..53288	-	100
AzucenaRS1	ONG0101040	Chr1	39793720	39794236	ptDNA	NC_001320.1	103471..103986	-	99.61
AzucenaRS1	ONG0101040	Chr1	39794237	39794462	mtDNA	NC_011033.1	251477..251702	+	100
AzucenaRS1	ONG0101040	Chr1	39794461	39794734	mtDNA	NC_011033.1	134793..135066	+	99.27
AzucenaRS1	ONG0101040	Chr1	39794732	39794867	mtDNA	NC_011033.1	287277..287412	+	99.26
AzucenaRS1	ONG0101040	Chr1	39794912	39795114	mtDNA	NC_011033.1	158448..158650	-	99.01
AzucenaRS1	ONG0101040	Chr1	39795114	39795500	mtDNA	NC_011033.1	220801..221187	+	98.97
AzucenaRS1	ONG0101040	Chr1	39795495	39795703	mtDNA	NC_011033.1	191265..191476	-	97.17
AzucenaRS1	ONG0101040	Chr1	39795710	39796130	mtDNA	NC_011033.1	163387..163808	-	99.76
AzucenaRS1	ONG0101040	Chr1	39796131	39796195	mtDNA	NC_011033.1	185195..185259	-	100
AzucenaRS1	ONG0101040	Chr1	39796862	39797095	mtDNA	NC_011033.1	214985..215218	+	99.57
AzucenaRS1	ONG0101040	Chr1	39797097	39797216	mtDNA	NC_011033.1	159870..159989	+	98.33
AzucenaRS1	ONG0101040	Chr1	39797217	39797338	mtDNA	NC_011033.1	93327..93448	+	100
AzucenaRS1	ONG0101040	Chr1	39797337	39797451	mtDNA	NC_011033.1	249606..249720	+	100
AzucenaRS1	ONG0101040	Chr1	39797452	39797534	mtDNA	NC_011033.1	347234..347316	+	97.59
AzucenaRS1	ONG0101040	Chr1	39780297	39780763	mtDNA	NC_011033.1	280394..280860	+	98.93
AzucenaRS1	ONG0101040	Chr1	39796196	39796861	mtDNA	NC_011033.1	229776..230440	-	99.55
AzucenaRS1	ONG0101050	Chr1	39868537	39868933	mtDNA	NC_011033.1	239652..240047	+	95.98
AzucenaRS1	ONG0101060	Chr1	40022304	40022786	mtDNA	NC_011033.1	244741..245223	+	95.45
AzucenaRS1	ONG0101070	Chr1	40257492	40257624	mtDNA	NC_011033.1	354165..354297	-	99.25
AzucenaRS1	ONG0101070	Chr1	40257626	40257800	ptDNA	NC_001320.1	129212..129386	+	94.29
AzucenaRS1	ONG0101080	Chr1	40698199	40698275	mtDNA	NC_011033.1	317546..317622	+	96.1
AzucenaRS1	ONG0101090	Chr1	41025030	41025209	ptDNA	NC_001320.1	36592..36773	+	86.26
AzucenaRS1	ONG0101100	Chr1	41644761	41644980	ptDNA	NC_001320.1	34945..35165	+	84.68
AzucenaRS1	ONG0101110	Chr1	42002250	42002378	mtDNA	NC_011033.1	164323..164452	+	94.62
AzucenaRS1	ONG0101120	Chr1	42219229	42219460	mtDNA	NC_011033.1	310452..310683	-	99.14
AzucenaRS1	ONG0101120	Chr1	42219460	42219565	mtDNA	NC_011033.1	266336..266445	-	96.36
AzucenaRS1	ONG0101120	Chr1	42219566	42219741	mtDNA	NC_011033.1	370468..370643	-	98.3
AzucenaRS1	ONG0101120	Chr1	42219742	42220569	mtDNA	NC_011033.1	303325..304154	-	98.92
AzucenaRS1	ONG0101130	Chr1	42227999	42228461	mtDNA	NC_011033.1	316628..317090	+	95.91
AzucenaRS1	ONG0101140	Chr1	42240566	42240676	mtDNA	NC_011033.1	336986..337096	-	97.3
AzucenaRS1	ONG0101150	Chr1	42455088	42455438	ptDNA	NC_001320.1	52239..52589	-	100
AzucenaRS1	ONG0101160	Chr1	42604601	42604661	ptDNA	NC_001320.1	26309..26369	-	98.36
AzucenaRS1	ONG0101180	Chr1	42886063	42886149	ptDNA	NC_001320.1	20352..20438	+	95.4
AzucenaRS1	ONG0101190	Chr1	43368783	43369211	ptDNA	NC_001320.1	39187..39615	+	97.9
AzucenaRS1	ONG0101200	Chr1	43800719	43800817	mtDNA	NC_011033.1	201502..201602	-	90.2
AzucenaRS1	ONG0101210	Chr1	43911061	43911640	ptDNA	NC_001320.1	1900..2482	-	94.21
AzucenaRS1	ONG0200010	Chr2	815354	815938	ptDNA	NC_001320.1	122420..123004	+	98.12
AzucenaRS1	ONG0200010	Chr2	822083	826250	ptDNA	NC_001320.1	114119..118289	-	98.23
AzucenaRS1	ONG0200010	Chr2	819093	822072	ptDNA	NC_001320.1	123000..125977	+	97.62
AzucenaRS1	ONG0200020	Chr2	1033057	1033304	ptDNA	NC_001320.1	15647..15896	+	90.4
AzucenaRS1	ONG0200030	Chr2	2373308	2373946	mtDNA	NC_011033.1	299906..300553	+	93.52
AzucenaRS1	ONG0200040	Chr2	2410605	2410668	mtDNA	NC_011033.1	155291..155354	-	100
AzucenaRS1	ONG0200040	Chr2	2410765	2410857	mtDNA	NC_011033.1	212843..212935	-	100
AzucenaRS1	ONG0200040	Chr2	2411021	2411079	mtDNA	NC_011033.1	384790..384848	+	100
AzucenaRS1	ONG0200040	Chr2	2411297	2411374	mtDNA	NC_011033.1	243448..243525	-	100
AzucenaRS1	ONG0200040	Chr2	2411372	2411448	ptDNA	NC_001320.1	88923..88999	-	98.7
AzucenaRS1	ONG0200040	Chr2	2411489	2411546	mtDNA	NC_011033.1	211448..211505	-	98.28
AzucenaRS1	ONG0200040	Chr2	2411547	2411619	mtDNA	NC_011033.1	131369..131441	+	100
AzucenaRS1	ONG0200050	Chr2	2554545	2554616	ptDNA	NC_001320.1	13888..13958	+	97.22
AzucenaRS1	ONG0200050	Chr2	2554611	2554846	ptDNA	NC_001320.1	125979..126205	-	91.18
AzucenaRS1	ONG0200070	Chr2	3392262	3392338	mtDNA	NC_011033.1	218211..218287	+	98.7
AzucenaRS1	ONG0200080	Chr2	4746583	4746635	ptDNA	NC_001320.1	51851..51903	+	100
AzucenaRS1	ONG0200080	Chr2	4746635	4746690	mtDNA	NC_011033.1	344158..344213	-	96.43
AzucenaRS1	ONG0200080	Chr2	4746691	4746769	mtDNA	NC_011033.1	410881..410959	-	98.73
AzucenaRS1	ONG0200080	Chr2	4746770	4746866	mtDNA	NC_011033.1	370779..370875	+	100
AzucenaRS1	ONG0200080	Chr2	4746866	4746960	mtDNA	NC_011033.1	139963..140057	+	95.79
AzucenaRS1	ONG0200090	Chr2	4967184	4967392	mtDNA	NC_011033.1	177993..178200	+	97.13
AzucenaRS1	ONG0200100	Chr2	5489631	5489796	mtDNA	NC_011033.1	152104..152261	-	87.43
AzucenaRS1	ONG0200110	Chr2	5551162	5551279	mtDNA	NC_011033.1	353490..353607	-	94.07
AzucenaRS1	ONG0200110	Chr2	5551295	5551382	mtDNA	NC_011033.1	285002..285089	-	96.59
AzucenaRS1	ONG0200120	Chr2	5902366	5902465	ptDNA	NC_001320.1	24373..24469	-	92
AzucenaRS1	ONG0200130	Chr2	6270310	6270447	mtDNA	NC_011033.1	164357..164494	+	97.1
AzucenaRS1	ONG0200130	Chr2	6270708	6270849	ptDNA	NC_001320.1	30936..31077	-	98.6
AzucenaRS1	ONG0200130	Chr2	6270848	6271062	mtDNA	NC_011033.1	229649..229868	-	95.45
AzucenaRS1	ONG0200140	Chr2	6745761	6746034	ptDNA	NC_001320.1	32792..33065	+	97.45
AzucenaRS1	ONG0200150	Chr2	6794097	6794278	mtDNA	NC_011033.1	381992..382173	+	95.6
AzucenaRS1	ONG0200160	Chr2	7134313	7134490	mtDNA	NC_011033.1	308243..308424	+	90.71
AzucenaRS1	ONG0200160	Chr2	7134526	7134598	mtDNA	NC_011033.1	189372..189444	+	98.63
AzucenaRS1	ONG0200170	Chr2	8003609	8003882	ptDNA	NC_001320.1	12555..12831	+	96.75
AzucenaRS1	ONG0200180	Chr2	9143591	9143664	ptDNA	NC_001320.1	52726..52799	-	94.59
AzucenaRS1	ONG0200190	Chr2	9511123	9511418	ptDNA	NC_001320.1	79219..79513	+	93.6
AzucenaRS1	ONG0200200	Chr2	9557111	9557532	ptDNA	NC_001320.1	34219..34637	+	93.6
AzucenaRS1	ONG0200210	Chr2	9753071	9753159	mtDNA	NC_011033.1	398286..398367	+	91.01
AzucenaRS1	ONG0200210	Chr2	9753160	9753238	mtDNA	NC_011033.1	171424..171502	-	97.47
AzucenaRS1	ONG0200220	Chr2	9821552	9821646	ptDNA	NC_001320.1	96560..96654	+	96.84
AzucenaRS1	ONG0200230	Chr2	10406653	10407881	ptDNA	NC_001320.1	64153..65378	+	86.41
AzucenaRS1	ONG0200240	Chr2	11290252	11290931	mtDNA	NC_011033.1	266482..267163	+	94.58
AzucenaRS1	ONG0200240	Chr2	11291298	11291362	mtDNA	NC_011033.1	106061..106125	+	96.92
AzucenaRS1	ONG0200240	Chr2	11291362	11291470	ptDNA	NC_001320.1	9703..9811	+	96.33
AzucenaRS1	ONG0200240	Chr2	11291543	11291660	mtDNA	NC_011033.1	290755..290872	-	94.92
AzucenaRS1	ONG0200240	Chr2	11291663	11291807	ptDNA	NC_001320.1	92293..92437	+	94.48
AzucenaRS1	ONG0200250	Chr2	11460171	11460248	mtDNA	NC_011033.1	203611..203688	-	100
AzucenaRS1	ONG0200250	Chr2	11460264	11460342	mtDNA	NC_011033.1	400747..400825	+	100
AzucenaRS1	ONG0200260	Chr2	12271357	12271436	mtDNA	NC_011033.1	50249..50328	-	100
AzucenaRS1	ONG0200260	Chr2	12271437	12271511	mtDNA	NC_011033.1	80326..80400	-	98.67
AzucenaRS1	ONG0200260	Chr2	12271633	12271820	mtDNA	NC_011033.1	241098..241285	+	95.21
AzucenaRS1	ONG0200260	Chr2	12271820	12271896	mtDNA	NC_011033.1	365958..366034	-	96.1
AzucenaRS1	ONG0200260	Chr2	12271896	12272141	mtDNA	NC_011033.1	261090..261334	+	97.97
AzucenaRS1	ONG0200260	Chr2	12272258	12272370	mtDNA	NC_011033.1	347594..347706	+	100
AzucenaRS1	ONG0200260	Chr2	12272568	12272675	mtDNA	NC_011033.1	387663..387770	-	100
AzucenaRS1	ONG0200260	Chr2	12272667	12272773	mtDNA	NC_011033.1	137314..137419	+	95.33
AzucenaRS1	ONG0200260	Chr2	12272818	12272956	ptDNA	NC_001320.1	13452..13589	+	92.81
AzucenaRS1	ONG0200260	Chr2	12272956	12273030	mtDNA	NC_011033.1	215520..215594	+	97.33
AzucenaRS1	ONG0200260	Chr2	12271511	12271633	mtDNA	NC_011033.1	359583..359705	+	98.37
AzucenaRS1	ONG0200270	Chr2	12487366	12487433	mtDNA	NC_011033.1	208270..208337	+	98.53
AzucenaRS1	ONG0200280	Chr2	13387926	13390694	ptDNA	NC_001320.1	110120..112891	-	98.38
AzucenaRS1	ONG0200280	Chr2	13391069	13391173	ptDNA	NC_001320.1	21554..21658	+	92.38
AzucenaRS1	ONG0200290	Chr2	13493255	13493358	mtDNA	NC_011033.1	210656..210759	-	95.19
AzucenaRS1	ONG0200290	Chr2	13493358	13493422	ptDNA	NC_001320.1	28038..28102	+	98.46
AzucenaRS1	ONG0200300	Chr2	13632607	13633002	ptDNA	NC_001320.1	58945..59342	+	97.99
AzucenaRS1	ONG0200310	Chr2	13945059	13945156	mtDNA	NC_011033.1	155136..155233	+	100
AzucenaRS1	ONG0200320	Chr2	14415138	14416516	ptDNA	NC_001320.1	108752..110127	-	99.49
AzucenaRS1	ONG0200320	Chr2	14425070	14425744	ptDNA	NC_001320.1	127825..128499	+	100
AzucenaRS1	ONG0200320	Chr2	14425739	14430753	ptDNA	NC_001320.1	108752..113760	+	99.54
AzucenaRS1	ONG0200320	Chr2	14430752	14432774	ptDNA	NC_001320.1	128879..130902	-	99.56
AzucenaRS1	ONG0200320	Chr2	14432777	14433096	ptDNA	NC_001320.1	123297..123616	-	99.69
AzucenaRS1	ONG0200320	Chr2	14433123	14433231	ptDNA	NC_001320.1	131747..131855	-	100
AzucenaRS1	ONG0200320	Chr2	14433229	14434072	ptDNA	NC_001320.1	48096..48939	+	99.76
AzucenaRS1	ONG0200320	Chr2	14436213	14440737	ptDNA	NC_001320.1	57611..62135	-	99.58
AzucenaRS1	ONG0200320	Chr2	14440748	14441026	ptDNA	NC_001320.1	22488..22766	+	98.92
AzucenaRS1	ONG0200320	Chr2	14441026	14442528	ptDNA	NC_001320.1	19789..21291	+	99.8
AzucenaRS1	ONG0200320	Chr2	14442538	14446663	ptDNA	NC_001320.1	26501..30629	+	99.64
AzucenaRS1	ONG0200320	Chr2	14434084	14436104	ptDNA	NC_001320.1	26602..28622	-	99.9
AzucenaRS1	ONG0200320	Chr2	14446655	14465127	ptDNA	NC_001320.1	6890..25383	-	99.7
AzucenaRS1	ONG0200320	Chr2	14416511	14425072	ptDNA	NC_001320.1	119936..128499	-	99.39
AzucenaRS1	ONG0200330	Chr2	14921277	14921367	mtDNA	NC_011033.1	382192..382282	-	96.7
AzucenaRS1	ONG0200330	Chr2	14921368	14921716	mtDNA	NC_011033.1	274236..274588	-	94.05
AzucenaRS1	ONG0200340	Chr2	15118168	15118266	mtDNA	NC_011033.1	302155..302253	+	100
AzucenaRS1	ONG0200340	Chr2	15121017	15121398	mtDNA	NC_011033.1	26187..26577	-	87.22
AzucenaRS1	ONG0200350	Chr2	15656196	15656495	mtDNA	NC_011033.1	453008..453307	+	92.33
AzucenaRS1	ONG0200360	Chr2	15675335	15675522	ptDNA	NC_001320.1	37331..37518	-	92.63
AzucenaRS1	ONG0200370	Chr2	15938860	15938951	ptDNA	NC_001320.1	124201..124292	+	97.83
AzucenaRS1	ONG0200380	Chr2	16132947	16133116	ptDNA	NC_001320.1	133..303	+	95.32
AzucenaRS1	ONG0200380	Chr2	16133114	16133261	ptDNA	NC_001320.1	131466..131614	-	95.3
AzucenaRS1	ONG0200390	Chr2	16233307	16233436	mtDNA	NC_011033.1	351417..351546	+	100
AzucenaRS1	ONG0200390	Chr2	16233435	16233610	mtDNA	NC_011033.1	328034..328209	+	97.16
AzucenaRS1	ONG0200400	Chr2	17792167	17792288	mtDNA	NC_011033.1	281456..281577	+	99.18
AzucenaRS1	ONG0200410	Chr2	17909439	17909569	mtDNA	NC_011033.1	256126..256256	-	98.47
AzucenaRS1	ONG0200420	Chr2	18342389	18342518	mtDNA	NC_011033.1	191397..191525	+	95.38
AzucenaRS1	ONG0200420	Chr2	18342518	18342604	mtDNA	NC_011033.1	115187..115273	-	97.7
AzucenaRS1	ONG0200430	Chr2	18369152	18369251	mtDNA	NC_011033.1	155775..155874	+	100
AzucenaRS1	ONG0200430	Chr2	18369375	18369486	mtDNA	NC_011033.1	106004..106115	+	99.11
AzucenaRS1	ONG0200430	Chr2	18369488	18369537	mtDNA	NC_011033.1	183294..183343	+	100
AzucenaRS1	ONG0200450	Chr2	19137041	19137111	mtDNA	NC_011033.1	208871..208941	+	91.55
AzucenaRS1	ONG0200460	Chr2	19695842	19695963	mtDNA	NC_011033.1	317807..317928	+	99.18
AzucenaRS1	ONG0200470	Chr2	19791036	19791177	ptDNA	NC_001320.1	119720..119861	+	100
AzucenaRS1	ONG0200470	Chr2	19791179	19791273	mtDNA	NC_011033.1	358535..358629	+	98.95
AzucenaRS1	ONG0200470	Chr2	19791273	19791583	ptDNA	NC_001320.1	36481..36749	-	85.85
AzucenaRS1	ONG0200470	Chr2	19791583	19791669	mtDNA	NC_011033.1	244911..244997	-	98.85
AzucenaRS1	ONG0200470	Chr2	19791661	19791780	ptDNA	NC_001320.1	10161..10280	+	97.5
AzucenaRS1	ONG0200470	Chr2	19791876	19791948	mtDNA	NC_011033.1	357726..357798	+	98.63
AzucenaRS1	ONG0200470	Chr2	19791947	19792143	mtDNA	NC_011033.1	381854..382050	-	97.97
AzucenaRS1	ONG0200470	Chr2	19792144	19792259	mtDNA	NC_011033.1	163197..163312	-	97.41
AzucenaRS1	ONG0200470	Chr2	19792257	19792323	ptDNA	NC_001320.1	54730..54796	+	100
AzucenaRS1	ONG0200470	Chr2	19792320	19792476	mtDNA	NC_011033.1	216961..217117	-	98.73
AzucenaRS1	ONG0200470	Chr2	19792477	19792618	ptDNA	NC_001320.1	26003..26144	-	97.89
AzucenaRS1	ONG0200470	Chr2	19792618	19792714	ptDNA	NC_001320.1	116936..117032	-	97.94
AzucenaRS1	ONG0200470	Chr2	19792713	19792965	mtDNA	NC_011033.1	80978..81230	-	99.21
AzucenaRS1	ONG0200470	Chr2	19792965	19793074	mtDNA	NC_011033.1	396526..396635	+	98.18
AzucenaRS1	ONG0200470	Chr2	19791781	19791877	ptDNA	NC_001320.1	74476..74572	-	100
AzucenaRS1	ONG0200480	Chr2	19984476	19984722	mtDNA	NC_011033.1	387660..387906	+	99.19
AzucenaRS1	ONG0200490	Chr2	20401749	20402085	ptDNA	NC_001320.1	121229..121565	-	92.92
AzucenaRS1	ONG0200500	Chr2	21219860	21219962	mtDNA	NC_011033.1	288719..288821	+	97.09
AzucenaRS1	ONG0200500	Chr2	21220036	21220296	mtDNA	NC_011033.1	278635..278895	-	94.64
AzucenaRS1	ONG0200500	Chr2	21220383	21220453	mtDNA	NC_011033.1	167239..167309	-	98.59
AzucenaRS1	ONG0200510	Chr2	21605247	21605346	mtDNA	NC_011033.1	232336..232435	-	87
AzucenaRS1	ONG0200520	Chr2	22172034	22172640	ptDNA	NC_001320.1	34816..35422	+	93.75
AzucenaRS1	ONG0200530	Chr2	22499525	22499721	mtDNA	NC_011033.1	353575..353772	+	96.46
AzucenaRS1	ONG0200540	Chr2	22667823	22668033	mtDNA	NC_011033.1	256712..256922	-	98.58
AzucenaRS1	ONG0200540	Chr2	22668034	22668359	ptDNA	NC_001320.1	110800..111125	-	99.69
AzucenaRS1	ONG0200540	Chr2	22668360	22669072	mtDNA	NC_011033.1	403054..403766	+	99.16
AzucenaRS1	ONG0200550	Chr2	23158513	23158565	mtDNA	NC_011033.1	52238..52290	-	98.11
AzucenaRS1	ONG0200560	Chr2	23209162	23209294	ptDNA	NC_001320.1	131238..131370	-	88.72
AzucenaRS1	ONG0200560	Chr2	23209358	23209486	ptDNA	NC_001320.1	33372..33503	+	91.67
AzucenaRS1	ONG0200590	Chr2	23634285	23634449	mtDNA	NC_011033.1	375293..375457	-	90.91
AzucenaRS1	ONG0200590	Chr2	23638358	23638522	mtDNA	NC_011033.1	375293..375457	-	92.73
AzucenaRS1	ONG0200600	Chr2	25222938	25223588	ptDNA	NC_001320.1	33215..33861	+	98
AzucenaRS1	ONG0200610	Chr2	25281694	25282668	ptDNA	NC_001320.1	77499..78487	-	95.65
AzucenaRS1	ONG0200620	Chr2	25277504	25277557	mtDNA	NC_011033.1	380898..380951	+	98.15
AzucenaRS1	ONG0200620	Chr2	25277555	25277632	mtDNA	NC_011033.1	418945..419022	-	98.72
AzucenaRS1	ONG0200620	Chr2	25277628	25277743	mtDNA	NC_011033.1	302594..302709	+	98.28
AzucenaRS1	ONG0200620	Chr2	25277744	25277859	mtDNA	NC_011033.1	197418..197536	+	96.64
AzucenaRS1	ONG0200620	Chr2	25277861	25277970	mtDNA	NC_011033.1	200809..200918	-	98.18
AzucenaRS1	ONG0200620	Chr2	25278020	25278119	mtDNA	NC_011033.1	285129..285228	+	100
AzucenaRS1	ONG0200630	Chr2	26123040	26123162	mtDNA	NC_011033.1	210568..210690	-	96.75
AzucenaRS1	ONG0200640	Chr2	26640032	26640261	ptDNA	NC_001320.1	75920..76186	+	82.16
AzucenaRS1	ONG0200650	Chr2	26821122	26821187	mtDNA	NC_011033.1	235367..235432	-	98.48
AzucenaRS1	ONG0200660	Chr2	26920281	26920388	mtDNA	NC_011033.1	200622..200728	+	97.22
AzucenaRS1	ONG0200670	Chr2	27058850	27058971	mtDNA	NC_011033.1	405747..405868	-	98.36
AzucenaRS1	ONG0200680	Chr2	27425212	27425394	ptDNA	NC_001320.1	6846..7028	+	98.91
AzucenaRS1	ONG0200690	Chr2	27970573	27970657	mtDNA	NC_011033.1	418644..418728	+	97.65
AzucenaRS1	ONG0200700	Chr2	28084705	28085184	ptDNA	NC_001320.1	102372..102851	-	99.38
AzucenaRS1	ONG0200710	Chr2	28147419	28147696	mtDNA	NC_011033.1	127063..127341	-	97.85
AzucenaRS1	ONG0200720	Chr2	28646296	28646443	mtDNA	NC_011033.1	204944..205085	-	91.89
AzucenaRS1	ONG0200730	Chr2	28957382	28957759	ptDNA	NC_001320.1	34080..34449	+	86.84
AzucenaRS1	ONG0200740	Chr2	29146558	29146645	mtDNA	NC_011033.1	175731..175820	+	93.33
AzucenaRS1	ONG0200750	Chr2	29535517	29535767	ptDNA	NC_001320.1	7766..8017	-	98.02
AzucenaRS1	ONG0200760	Chr2	29858310	29858435	ptDNA	NC_001320.1	43120..43245	+	93.7
AzucenaRS1	ONG0200770	Chr2	30146723	30146947	mtDNA	NC_011033.1	225835..226058	-	96.46
AzucenaRS1	ONG0200780	Chr2	31386504	31386583	mtDNA	NC_011033.1	471394..471473	+	97.5
AzucenaRS1	ONG0200790	Chr2	32518459	32518587	mtDNA	NC_011033.1	21132..21260	-	94.62
AzucenaRS1	ONG0200800	Chr2	32658447	32658571	mtDNA	NC_011033.1	365171..365295	-	100
AzucenaRS1	ONG0200810	Chr2	33051243	33051416	ptDNA	NC_001320.1	1808..1980	+	96.55
AzucenaRS1	ONG0200820	Chr2	33188858	33189010	ptDNA	NC_001320.1	7825..7977	-	100
AzucenaRS1	ONG0200830	Chr2	33730300	33730412	mtDNA	NC_011033.1	356683..356796	+	99.12
AzucenaRS1	ONG0200840	Chr2	33880634	33880869	ptDNA	NC_001320.1	15814..16049	+	99.15
AzucenaRS1	ONG0200850	Chr2	34331868	34331982	mtDNA	NC_011033.1	221635..221749	-	100
AzucenaRS1	ONG0200860	Chr2	35679880	35679974	ptDNA	NC_001320.1	102658..102752	-	98.95
AzucenaRS1	ONG0200870	Chr2	35713497	35714045	ptDNA	NC_001320.1	14443..15004	+	90.85
AzucenaRS1	ONG0200880	Chr2	35990943	35991214	mtDNA	NC_011033.1	118515..118786	+	99.26
AzucenaRS1	ONG0300010	Chr3	701788	701977	ptDNA	NC_001320.1	94737..94926	+	97.37
AzucenaRS1	ONG0300020	Chr3	1035251	1035374	ptDNA	NC_001320.1	101478..101601	-	93.55
AzucenaRS1	ONG0300030	Chr3	2338905	2339147	mtDNA	NC_011033.1	352970..353212	-	100
AzucenaRS1	ONG0300040	Chr3	2629728	2629895	ptDNA	NC_001320.1	18563..18728	+	90.53
AzucenaRS1	ONG0300050	Chr3	3080603	3080667	mtDNA	NC_011033.1	62340..62404	+	98.46
AzucenaRS1	ONG0300060	Chr3	3197513	3197616	mtDNA	NC_011033.1	101077..101180	-	94.23
AzucenaRS1	ONG0300070	Chr3	3478126	3478208	mtDNA	NC_011033.1	288136..288219	+	96.43
AzucenaRS1	ONG0300080	Chr3	5055213	5055450	mtDNA	NC_011033.1	404939..405173	-	97.06
AzucenaRS1	ONG0300080	Chr3	5055543	5055792	mtDNA	NC_011033.1	335244..335495	+	96.83
AzucenaRS1	ONG0300080	Chr3	5055796	5055932	mtDNA	NC_011033.1	342335..342471	+	84.67
AzucenaRS1	ONG0300080	Chr3	5056001	5056248	mtDNA	NC_011033.1	373998..374245	+	99.19
AzucenaRS1	ONG0300080	Chr3	5057700	5057982	ptDNA	NC_001320.1	54920..55202	-	97.88
AzucenaRS1	ONG0300080	Chr3	5057985	5058092	mtDNA	NC_011033.1	340433..340541	+	96.33
AzucenaRS1	ONG0300090	Chr3	5417996	5418276	mtDNA	NC_011033.1	55214..55483	+	95.73
AzucenaRS1	ONG0300090	Chr3	5418277	5418381	mtDNA	NC_011033.1	60973..61077	+	99.05
AzucenaRS1	ONG0300090	Chr3	5418382	5419364	mtDNA	NC_011033.1	218051..219029	-	98.07
AzucenaRS1	ONG0300100	Chr3	5799548	5799919	ptDNA	NC_001320.1	67007..67375	-	93.03
AzucenaRS1	ONG0300110	Chr3	6197173	6197349	ptDNA	NC_001320.1	66258..66429	+	94.94
AzucenaRS1	ONG0300120	Chr3	6735106	6735241	ptDNA	NC_001320.1	18552..18686	-	94.93
AzucenaRS1	ONG0300130	Chr3	6759439	6759593	mtDNA	NC_011033.1	339718..339873	-	94.23
AzucenaRS1	ONG0300140	Chr3	7663795	7664183	ptDNA	NC_001320.1	132927..133315	-	98.97
AzucenaRS1	ONG0300150	Chr3	8136956	8137453	ptDNA	NC_001320.1	116200..116698	-	98.8
AzucenaRS1	ONG0300170	Chr3	11028036	11028187	mtDNA	NC_011033.1	322785..322936	+	98.68
AzucenaRS1	ONG0300170	Chr3	11028189	11028284	mtDNA	NC_011033.1	13798..13893	+	98.96
AzucenaRS1	ONG0300170	Chr3	11028285	11028778	mtDNA	NC_011033.1	314254..314747	-	97.98
AzucenaRS1	ONG0300170	Chr3	11028779	11029070	mtDNA	NC_011033.1	83749..84040	+	99.32
AzucenaRS1	ONG0300170	Chr3	11029072	11029297	mtDNA	NC_011033.1	55331..55545	-	94.25
AzucenaRS1	ONG0300170	Chr3	11029297	11030229	mtDNA	NC_011033.1	62723..63655	-	98.61
AzucenaRS1	ONG0300170	Chr3	11030228	11030325	mtDNA	NC_011033.1	62708..62805	-	100
AzucenaRS1	ONG0300170	Chr3	11031216	11032457	mtDNA	NC_011033.1	61473..62714	-	98.63
AzucenaRS1	ONG0300170	Chr3	11032454	11032729	ptDNA	NC_001320.1	59932..60207	+	98.19
AzucenaRS1	ONG0300200	Chr3	11872310	11872456	mtDNA	NC_011033.1	332113..332259	+	99.32
AzucenaRS1	ONG0300200	Chr3	11872456	11872536	mtDNA	NC_011033.1	197586..197666	+	100
AzucenaRS1	ONG0300210	Chr3	13252758	13252835	mtDNA	NC_011033.1	248161..248238	+	97.44
AzucenaRS1	ONG0300220	Chr3	13530387	13530627	ptDNA	NC_001320.1	113065..113310	+	88.21
AzucenaRS1	ONG0300230	Chr3	14093359	14093571	mtDNA	NC_011033.1	344868..345095	-	92.54
AzucenaRS1	ONG0300230	Chr3	14093572	14094010	mtDNA	NC_011033.1	367267..367705	-	99.09
AzucenaRS1	ONG0300230	Chr3	14094007	14094309	mtDNA	NC_011033.1	415236..415538	-	99.01
AzucenaRS1	ONG0300230	Chr3	14094406	14094549	mtDNA	NC_011033.1	404224..404367	+	99.31
AzucenaRS1	ONG0300230	Chr3	14094550	14094717	mtDNA	NC_011033.1	35109..35276	+	98.81
AzucenaRS1	ONG0300230	Chr3	14094715	14095043	mtDNA	NC_011033.1	48148..48476	-	98.48
AzucenaRS1	ONG0300230	Chr3	14095041	14095099	mtDNA	NC_011033.1	205331..205389	+	100
AzucenaRS1	ONG0300230	Chr3	14095095	14095178	mtDNA	NC_011033.1	101244..101327	-	100
AzucenaRS1	ONG0300230	Chr3	14095178	14095473	mtDNA	NC_011033.1	70642..70937	+	98.31
AzucenaRS1	ONG0300230	Chr3	14095474	14095948	mtDNA	NC_011033.1	16693..17167	+	99.58
AzucenaRS1	ONG0300230	Chr3	14095949	14096042	mtDNA	NC_011033.1	230191..230284	+	100
AzucenaRS1	ONG0300230	Chr3	14096043	14096173	mtDNA	NC_011033.1	209856..209986	+	99.24
AzucenaRS1	ONG0300230	Chr3	14096173	14096569	mtDNA	NC_011033.1	99884..100280	+	98.74
AzucenaRS1	ONG0300230	Chr3	14096567	14096881	mtDNA	NC_011033.1	247610..247924	+	99.37
AzucenaRS1	ONG0300230	Chr3	14097042	14097114	mtDNA	NC_011033.1	329144..329216	-	100
AzucenaRS1	ONG0300230	Chr3	14097114	14097207	mtDNA	NC_011033.1	232943..233036	-	97.87
AzucenaRS1	ONG0300230	Chr3	14097201	14097714	mtDNA	NC_011033.1	378364..378871	+	98.44
AzucenaRS1	ONG0300230	Chr3	14097705	14097812	ptDNA	NC_001320.1	118198..118304	-	99.07
AzucenaRS1	ONG0300230	Chr3	14097813	14098218	mtDNA	NC_011033.1	431676..432090	+	97.35
AzucenaRS1	ONG0300230	Chr3	14098219	14098422	mtDNA	NC_011033.1	32190..32393	-	99.51
AzucenaRS1	ONG0300230	Chr3	14098420	14098615	mtDNA	NC_011033.1	352846..353041	-	97.45
AzucenaRS1	ONG0300230	Chr3	14098615	14099031	mtDNA	NC_011033.1	257992..258395	+	96.88
AzucenaRS1	ONG0300230	Chr3	14099031	14099122	mtDNA	NC_011033.1	354602..354693	+	98.91
AzucenaRS1	ONG0300230	Chr3	14099120	14099193	mtDNA	NC_011033.1	90221..90294	-	100
AzucenaRS1	ONG0300230	Chr3	14099216	14099265	mtDNA	NC_011033.1	227187..227236	+	100
AzucenaRS1	ONG0300230	Chr3	14099621	14099907	mtDNA	NC_011033.1	122549..122836	+	97.22
AzucenaRS1	ONG0300230	Chr3	14099911	14100037	mtDNA	NC_011033.1	331726..331852	-	98.43
AzucenaRS1	ONG0300230	Chr3	14100246	14100353	mtDNA	NC_011033.1	2869..2976	+	98.15
AzucenaRS1	ONG0300230	Chr3	14100406	14100561	mtDNA	NC_011033.1	273492..273647	-	98.08
AzucenaRS1	ONG0300230	Chr3	14100842	14101049	mtDNA	NC_011033.1	404814..405021	+	98.56
AzucenaRS1	ONG0300230	Chr3	14101049	14101121	mtDNA	NC_011033.1	334567..334639	+	100
AzucenaRS1	ONG0300230	Chr3	14101541	14101715	mtDNA	NC_011033.1	34157..34331	-	99.43
AzucenaRS1	ONG0300230	Chr3	14101714	14101853	mtDNA	NC_011033.1	82804..82943	-	100
AzucenaRS1	ONG0300230	Chr3	14101852	14101947	mtDNA	NC_011033.1	377574..377669	+	100
AzucenaRS1	ONG0300230	Chr3	14101948	14102149	mtDNA	NC_011033.1	258697..258898	+	99.5
AzucenaRS1	ONG0300230	Chr3	14102196	14102329	mtDNA	NC_011033.1	205569..205702	-	100
AzucenaRS1	ONG0300230	Chr3	14102438	14102636	mtDNA	NC_011033.1	293137..293335	-	99.5
AzucenaRS1	ONG0300240	Chr3	14171660	14171783	mtDNA	NC_011033.1	208611..208734	-	96.77
AzucenaRS1	ONG0300250	Chr3	14433109	14433300	ptDNA	NC_001320.1	8797..8975	-	87.5
AzucenaRS1	ONG0300260	Chr3	14530648	14532886	ptDNA	NC_001320.1	114730..116978	+	98.62
AzucenaRS1	ONG0300270	Chr3	14605002	14605082	mtDNA	NC_011033.1	192788..192868	+	100
AzucenaRS1	ONG0300280	Chr3	14797405	14797488	mtDNA	NC_011033.1	59606..59689	+	96.43
AzucenaRS1	ONG0300290	Chr3	15368135	15368361	ptDNA	NC_001320.1	46986..47214	+	96.52
AzucenaRS1	ONG0300300	Chr3	15910628	15910679	mtDNA	NC_011033.1	364193..364244	-	100
AzucenaRS1	ONG0300310	Chr3	16718249	16718636	ptDNA	NC_001320.1	71111..71496	+	94.36
AzucenaRS1	ONG0300320	Chr3	17045998	17046184	mtDNA	NC_011033.1	170740..170926	-	97.86
AzucenaRS1	ONG0300320	Chr3	17046425	17046566	ptDNA	NC_001320.1	113479..113619	+	93.66
AzucenaRS1	ONG0300320	Chr3	17046566	17046652	ptDNA	NC_001320.1	58240..58326	+	98.85
AzucenaRS1	ONG0300320	Chr3	17046659	17046848	mtDNA	NC_011033.1	179591..179780	+	93.75
AzucenaRS1	ONG0300320	Chr3	17046854	17047025	ptDNA	NC_001320.1	56535..56710	-	92.05
AzucenaRS1	ONG0300320	Chr3	17047284	17047509	mtDNA	NC_011033.1	311960..312190	-	93.07
AzucenaRS1	ONG0300330	Chr3	18306950	18307534	ptDNA	NC_001320.1	33072..33672	-	89.05
AzucenaRS1	ONG0300340	Chr3	18509848	18510173	mtDNA	NC_011033.1	373851..374177	+	93.31
AzucenaRS1	ONG0300350	Chr3	18873763	18873913	mtDNA	NC_011033.1	316457..316607	-	97.35
AzucenaRS1	ONG0300350	Chr3	18873904	18874065	mtDNA	NC_011033.1	291953..292114	+	98.77
AzucenaRS1	ONG0300390	Chr3	22205232	22205288	mtDNA	NC_011033.1	233906..233962	-	100
AzucenaRS1	ONG0300400	Chr3	22215321	22215703	ptDNA	NC_001320.1	58076..58452	+	97.65
AzucenaRS1	ONG0300410	Chr3	23159184	23159284	mtDNA	NC_011033.1	280260..280359	-	95.05
AzucenaRS1	ONG0300420	Chr3	23289357	23289412	mtDNA	NC_011033.1	3821..3876	-	100
AzucenaRS1	ONG0300430	Chr3	23370982	23371178	mtDNA	NC_011033.1	62304..62501	+	95.96
AzucenaRS1	ONG0300440	Chr3	24030937	24031054	mtDNA	NC_011033.1	400794..400911	+	96.61
AzucenaRS1	ONG0300450	Chr3	24412125	24412284	mtDNA	NC_011033.1	88891..89051	-	94.41
AzucenaRS1	ONG0300460	Chr3	24868360	24868443	mtDNA	NC_011033.1	461992..462075	-	97.62
AzucenaRS1	ONG0300470	Chr3	25600674	25601177	mtDNA	NC_011033.1	414647..415148	-	96.63
AzucenaRS1	ONG0300470	Chr3	25601177	25604877	mtDNA	NC_011033.1	411073..414761	-	95.97
AzucenaRS1	ONG0300480	Chr3	25627850	25627931	mtDNA	NC_011033.1	304240..304321	+	95.12
AzucenaRS1	ONG0300490	Chr3	26140884	26141033	mtDNA	NC_011033.1	229054..229203	-	100
AzucenaRS1	ONG0300500	Chr3	26482867	26483262	ptDNA	NC_001320.1	48526..48928	-	93.3
AzucenaRS1	ONG0300510	Chr3	26551381	26551615	ptDNA	NC_001320.1	4979..5212	+	99.57
AzucenaRS1	ONG0300520	Chr3	26706189	26706370	ptDNA	NC_001320.1	78276..78467	-	93.75
AzucenaRS1	ONG0300520	Chr3	26706369	26707257	ptDNA	NC_001320.1	77381..78269	+	97.98
AzucenaRS1	ONG0300520	Chr3	26704736	26706190	ptDNA	NC_001320.1	75925..77382	+	98.15
AzucenaRS1	ONG0300530	Chr3	27202028	27205785	ptDNA	NC_001320.1	102747..106500	-	97.83
AzucenaRS1	ONG0300530	Chr3	27205798	27205934	ptDNA	NC_001320.1	102747..102883	-	98.54
AzucenaRS1	ONG0300540	Chr3	27693966	27694112	mtDNA	NC_011033.1	384781..384927	-	95.24
AzucenaRS1	ONG0300540	Chr3	27696317	27696528	mtDNA	NC_011033.1	206227..206438	-	99.53
AzucenaRS1	ONG0300540	Chr3	27696534	27696836	mtDNA	NC_011033.1	278695..278997	+	99.01
AzucenaRS1	ONG0300550	Chr3	27761608	27761701	mtDNA	NC_011033.1	261726..261819	-	93.62
AzucenaRS1	ONG0300550	Chr3	27761841	27761946	mtDNA	NC_011033.1	118365..118470	-	89.62
AzucenaRS1	ONG0300550	Chr3	27762547	27762728	mtDNA	NC_011033.1	73711..73890	+	91.21
AzucenaRS1	ONG0300560	Chr3	27764309	27764727	ptDNA	NC_001320.1	61943..62361	-	100
AzucenaRS1	ONG0300570	Chr3	27970806	27970951	ptDNA	NC_001320.1	47749..47894	+	98.63
AzucenaRS1	ONG0300570	Chr3	27971002	27971058	ptDNA	NC_001320.1	25614..25670	+	100
AzucenaRS1	ONG0300570	Chr3	27971158	27971218	ptDNA	NC_001320.1	73541..73601	+	100
AzucenaRS1	ONG0300570	Chr3	27971301	27971384	ptDNA	NC_001320.1	82424..82507	+	98.81
AzucenaRS1	ONG0300570	Chr3	27971443	27971552	ptDNA	NC_001320.1	93015..93124	+	93.64
AzucenaRS1	ONG0300570	Chr3	27971598	27971716	ptDNA	NC_001320.1	47019..47137	-	96.64
AzucenaRS1	ONG0300570	Chr3	27971786	27971836	ptDNA	NC_001320.1	40318..40368	+	100
AzucenaRS1	ONG0300570	Chr3	27971880	27972031	ptDNA	NC_001320.1	70505..70656	-	98.03
AzucenaRS1	ONG0300570	Chr3	27972031	27972169	ptDNA	NC_001320.1	104749..104887	+	99.28
AzucenaRS1	ONG0300570	Chr3	27972168	27972242	ptDNA	NC_001320.1	118828..118902	+	97.33
AzucenaRS1	ONG0300570	Chr3	27972242	27972294	ptDNA	NC_001320.1	19477..19529	-	100
AzucenaRS1	ONG0300570	Chr3	27972295	27972389	ptDNA	NC_001320.1	63870..63964	+	97.89
AzucenaRS1	ONG0300570	Chr3	27972389	27972433	ptDNA	NC_001320.1	93551..93594	-	97.78
AzucenaRS1	ONG0300570	Chr3	27972496	27972565	ptDNA	NC_001320.1	109938..110007	+	97.14
AzucenaRS1	ONG0300570	Chr3	27972564	27972709	ptDNA	NC_001320.1	109477..109622	-	99.32
AzucenaRS1	ONG0300570	Chr3	27972705	27972762	ptDNA	NC_001320.1	91930..91987	+	98.28
AzucenaRS1	ONG0300570	Chr3	27972762	27972852	ptDNA	NC_001320.1	92500..92590	+	98.9
AzucenaRS1	ONG0300580	Chr3	28232031	28232388	ptDNA	NC_001320.1	61640..61997	-	98.04
AzucenaRS1	ONG0300590	Chr3	28251791	28251868	ptDNA	NC_001320.1	27226..27303	+	98.72
AzucenaRS1	ONG0300600	Chr3	28490492	28491355	mtDNA	NC_011033.1	366796..367671	+	92.81
AzucenaRS1	ONG0300610	Chr3	28577355	28577718	mtDNA	NC_011033.1	324601..324968	-	94.31
AzucenaRS1	ONG0300620	Chr3	28721716	28721928	mtDNA	NC_011033.1	366053..366271	-	90.91
AzucenaRS1	ONG0300630	Chr3	28872118	28872320	ptDNA	NC_001320.1	42013..42215	+	100
AzucenaRS1	ONG0300630	Chr3	28872321	28872492	mtDNA	NC_011033.1	115587..115759	+	99.42
AzucenaRS1	ONG0300640	Chr3	29068680	29068915	mtDNA	NC_011033.1	108954..109189	-	98.73
AzucenaRS1	ONG0300650	Chr3	29285424	29285615	mtDNA	NC_011033.1	70951..71142	+	94.79
AzucenaRS1	ONG0300660	Chr3	29591692	29593135	ptDNA	NC_001320.1	32860..34297	+	98.27
AzucenaRS1	ONG0300660	Chr3	29593132	29594123	ptDNA	NC_001320.1	96298..97287	-	98.69
AzucenaRS1	ONG0300660	Chr3	29594156	29595267	ptDNA	NC_001320.1	35033..36143	+	98.74
AzucenaRS1	ONG0300670	Chr3	30380549	30381051	ptDNA	NC_001320.1	82356..82864	-	85.85
AzucenaRS1	ONG0300680	Chr3	30605837	30606002	mtDNA	NC_011033.1	194089..194254	+	97.59
AzucenaRS1	ONG0300680	Chr3	30606003	30606263	mtDNA	NC_011033.1	215815..216076	+	98.09
AzucenaRS1	ONG0300690	Chr3	30686425	30686491	mtDNA	NC_011033.1	82577..82642	+	98.51
AzucenaRS1	ONG0300690	Chr3	30686737	30686893	mtDNA	NC_011033.1	69084..69240	-	100
AzucenaRS1	ONG0300690	Chr3	30686893	30686990	mtDNA	NC_011033.1	269004..269101	-	94.9
AzucenaRS1	ONG0300690	Chr3	30686990	30687086	mtDNA	NC_011033.1	343263..343359	+	94.85
AzucenaRS1	ONG0300690	Chr3	30687293	30687413	mtDNA	NC_011033.1	314885..315005	+	97.52
AzucenaRS1	ONG0300690	Chr3	30687414	30687521	mtDNA	NC_011033.1	130662..130769	+	99.07
AzucenaRS1	ONG0300690	Chr3	30687087	30687297	mtDNA	NC_011033.1	407509..407716	-	96.68
AzucenaRS1	ONG0300700	Chr3	30698061	30698276	mtDNA	NC_011033.1	66596..66811	-	89.35
AzucenaRS1	ONG0300700	Chr3	30698281	30698462	ptDNA	NC_001320.1	69397..69580	+	97.28
AzucenaRS1	ONG0300700	Chr3	30698463	30698593	mtDNA	NC_011033.1	230079..230209	+	100
AzucenaRS1	ONG0300700	Chr3	30698594	30698799	mtDNA	NC_011033.1	401114..401319	-	99.51
AzucenaRS1	ONG0300700	Chr3	30698798	30698957	mtDNA	NC_011033.1	107196..107356	-	96.89
AzucenaRS1	ONG0300700	Chr3	30698958	30699060	ptDNA	NC_001320.1	7364..7467	-	98.08
AzucenaRS1	ONG0300710	Chr3	30860973	30861038	mtDNA	NC_011033.1	130329..130394	+	100
AzucenaRS1	ONG0300710	Chr3	30861123	30861277	ptDNA	NC_001320.1	73960..74114	+	100
AzucenaRS1	ONG0300710	Chr3	30861353	30861467	mtDNA	NC_011033.1	407161..407275	-	100
AzucenaRS1	ONG0300710	Chr3	30861608	30861703	mtDNA	NC_011033.1	448762..448857	+	97.92
AzucenaRS1	ONG0300710	Chr3	30861781	30861855	mtDNA	NC_011033.1	91050..91124	+	100
AzucenaRS1	ONG0300710	Chr3	30861856	30861917	mtDNA	NC_011033.1	298476..298537	-	98.39
AzucenaRS1	ONG0300710	Chr3	30861917	30861995	mtDNA	NC_011033.1	408028..408106	+	100
AzucenaRS1	ONG0300710	Chr3	30862201	30862253	mtDNA	NC_011033.1	54223..54275	+	100
AzucenaRS1	ONG0300710	Chr3	30862292	30862433	mtDNA	NC_011033.1	277421..277562	+	99.3
AzucenaRS1	ONG0300710	Chr3	30862475	30862542	mtDNA	NC_011033.1	308713..308780	-	98.53
AzucenaRS1	ONG0300720	Chr3	30868740	30869163	ptDNA	NC_001320.1	60001..60431	+	96.29
AzucenaRS1	ONG0300730	Chr3	31207442	31207637	ptDNA	NC_001320.1	102879..103081	+	85.85
AzucenaRS1	ONG0300740	Chr3	31624826	31624991	mtDNA	NC_011033.1	208298..208463	-	99.4
AzucenaRS1	ONG0300750	Chr3	32014513	32014658	mtDNA	NC_011033.1	129296..129440	+	99.32
AzucenaRS1	ONG0300760	Chr3	32352964	32353061	mtDNA	NC_011033.1	80587..80684	+	98.98
AzucenaRS1	ONG0300770	Chr3	32532974	32533069	mtDNA	NC_011033.1	77289..77384	-	100
AzucenaRS1	ONG0300780	Chr3	32643835	32644155	mtDNA	NC_011033.1	271110..271430	+	98.13
AzucenaRS1	ONG0300790	Chr3	33213432	33213896	ptDNA	NC_001320.1	130924..131403	-	84.06
AzucenaRS1	ONG0300800	Chr3	33436303	33436423	mtDNA	NC_011033.1	163100..163220	-	95.04
AzucenaRS1	ONG0300800	Chr3	33436423	33436500	mtDNA	NC_011033.1	129038..129113	-	96.15
AzucenaRS1	ONG0300800	Chr3	33436490	33436593	mtDNA	NC_011033.1	380352..380455	+	98.08
AzucenaRS1	ONG0300810	Chr3	33890864	33891329	mtDNA	NC_011033.1	248001..248477	-	91.06
AzucenaRS1	ONG0300830	Chr3	34377967	34378247	ptDNA	NC_001320.1	77371..77651	+	97.51
AzucenaRS1	ONG0300830	Chr3	34378404	34378498	mtDNA	NC_011033.1	230295..230389	-	98.95
AzucenaRS1	ONG0300840	Chr3	34722782	34722916	mtDNA	NC_011033.1	63740..63871	-	93.33
AzucenaRS1	ONG0300850	Chr3	35137538	35137731	ptDNA	NC_001320.1	106599..106792	+	100
AzucenaRS1	ONG0300860	Chr3	35183338	35183518	mtDNA	NC_011033.1	178377..178551	-	93.41
AzucenaRS1	ONG0300870	Chr3	35322537	35322716	mtDNA	NC_011033.1	331834..332014	+	98.9
AzucenaRS1	ONG0300880	Chr3	35614780	35614851	mtDNA	NC_011033.1	52450..52521	+	95.83
AzucenaRS1	ONG0300880	Chr3	35614892	35615060	mtDNA	NC_011033.1	438652..438832	-	89.56
AzucenaRS1	ONG0300890	Chr3	35684749	35684869	mtDNA	NC_011033.1	29645..29765	-	90.08
AzucenaRS1	ONG0300900	Chr3	35878925	35879032	mtDNA	NC_011033.1	377866..377973	+	99.07
AzucenaRS1	ONG0300910	Chr3	36416669	36417105	ptDNA	NC_001320.1	93087..93526	-	96.36
AzucenaRS1	ONG0300910	Chr3	36416669	36417105	ptDNA	NC_001320.1	121592..122031	+	96.36
AzucenaRS1	ONG0300920	Chr3	36555887	36556843	ptDNA	NC_001320.1	11350..12304	+	99.06
AzucenaRS1	ONG0300930	Chr3	36564726	36564889	mtDNA	NC_011033.1	299985..300154	+	91.23
AzucenaRS1	ONG0300940	Chr3	37496026	37496254	mtDNA	NC_011033.1	100150..100378	+	96.07
AzucenaRS1	ONG0300940	Chr3	37496416	37496596	mtDNA	NC_011033.1	100378..100557	+	96.69
AzucenaRS1	ONG0300950	Chr3	37673869	37673942	ptDNA	NC_001320.1	100557..100630	-	100
AzucenaRS1	ONG0300950	Chr3	37674180	37674292	ptDNA	NC_001320.1	114560..114672	+	100
AzucenaRS1	ONG0300950	Chr3	37674292	37674353	ptDNA	NC_001320.1	49513..49574	-	100
AzucenaRS1	ONG0300950	Chr3	37674349	37674477	mtDNA	NC_011033.1	217367..217495	+	97.67
AzucenaRS1	ONG0300950	Chr3	37674478	37674696	ptDNA	NC_001320.1	103983..104200	+	99.09
AzucenaRS1	ONG0300950	Chr3	37674695	37675014	ptDNA	NC_001320.1	17145..17456	+	95.62
AzucenaRS1	ONG0300950	Chr3	37675014	37675087	ptDNA	NC_001320.1	45666..45739	-	98.65
AzucenaRS1	ONG0300950	Chr3	37675087	37675181	ptDNA	NC_001320.1	11643..11737	+	97.89
AzucenaRS1	ONG0300950	Chr3	37675180	37675261	mtDNA	NC_011033.1	114451..114532	-	98.78
AzucenaRS1	ONG0300950	Chr3	37675260	37675542	ptDNA	NC_001320.1	113740..114023	+	98.94
AzucenaRS1	ONG0300950	Chr3	37675541	37675662	ptDNA	NC_001320.1	15414..15535	+	100
AzucenaRS1	ONG0300950	Chr3	37675661	37675764	ptDNA	NC_001320.1	124023..124126	+	99.04
AzucenaRS1	ONG0300950	Chr3	37675762	37675851	ptDNA	NC_001320.1	36092..36181	-	97.78
AzucenaRS1	ONG0300950	Chr3	37675851	37675979	ptDNA	NC_001320.1	109885..110013	-	100
AzucenaRS1	ONG0300950	Chr3	37675976	37676115	ptDNA	NC_001320.1	107145..107284	+	99.29
AzucenaRS1	ONG0300950	Chr3	37676206	37676307	ptDNA	NC_001320.1	68036..68137	+	97.06
AzucenaRS1	ONG0300960	Chr3	38005326	38006875	ptDNA	NC_001320.1	84080..85634	+	98.59
AzucenaRS1	ONG0300970	Chr3	38287531	38287612	mtDNA	NC_011033.1	86821..86902	+	100
AzucenaRS1	ONG0300980	Chr3	38349021	38349150	ptDNA	NC_001320.1	71559..71689	-	97.71
AzucenaRS1	ONG0300980	Chr3	38349188	38349272	ptDNA	NC_001320.1	56275..56359	+	98.82
AzucenaRS1	ONG0300980	Chr3	38349372	38349523	ptDNA	NC_001320.1	29864..30015	-	96.71
AzucenaRS1	ONG0400070	Chr4	4101305	4101442	ptDNA	NC_001320.1	18768..18912	+	90.34
AzucenaRS1	ONG0400080	Chr4	4368262	4368373	mtDNA	NC_011033.1	311855..311966	+	97.32
AzucenaRS1	ONG0400090	Chr4	4456260	4456449	mtDNA	NC_011033.1	265275..265464	-	96.32
AzucenaRS1	ONG0400100	Chr4	4611429	4611620	mtDNA	NC_011033.1	265275..265464	-	96.35
AzucenaRS1	ONG0400110	Chr4	4782413	4782713	ptDNA	NC_001320.1	34987..35286	+	87.83
AzucenaRS1	ONG0400110	Chr4	4783012	4783283	ptDNA	NC_001320.1	11320..11593	-	89.93
AzucenaRS1	ONG0400120	Chr4	4866476	4866593	mtDNA	NC_011033.1	282911..283028	+	94.07
AzucenaRS1	ONG0400130	Chr4	5272435	5272662	mtDNA	NC_011033.1	54788..55015	-	95.18
AzucenaRS1	ONG0400140	Chr4	5283004	5283265	mtDNA	NC_011033.1	54751..55012	-	93.89
AzucenaRS1	ONG0400150	Chr4	6976329	6976701	mtDNA	NC_011033.1	126189..126563	-	88.06
AzucenaRS1	ONG0400180	Chr4	8676830	8677363	ptDNA	NC_001320.1	49268..49801	-	98.14
AzucenaRS1	ONG0400180	Chr4	8677364	8677662	ptDNA	NC_001320.1	87266..87570	-	97.7
AzucenaRS1	ONG0400180	Chr4	8677364	8677662	ptDNA	NC_001320.1	127548..127852	+	97.7
AzucenaRS1	ONG0400180	Chr4	8678071	8678139	mtDNA	NC_011033.1	314908..314976	+	100
AzucenaRS1	ONG0400180	Chr4	8678139	8678251	mtDNA	NC_011033.1	49295..49407	+	99.12
AzucenaRS1	ONG0400180	Chr4	8678301	8678471	mtDNA	NC_011033.1	434481..434651	+	99.42
AzucenaRS1	ONG0400180	Chr4	8678471	8678547	mtDNA	NC_011033.1	428039..428115	+	100
AzucenaRS1	ONG0400180	Chr4	8678549	8678634	mtDNA	NC_011033.1	348528..348613	-	98.84
AzucenaRS1	ONG0400180	Chr4	8678635	8678748	mtDNA	NC_011033.1	346101..346214	-	100
AzucenaRS1	ONG0400180	Chr4	8678746	8678804	mtDNA	NC_011033.1	55501..55559	+	100
AzucenaRS1	ONG0400180	Chr4	12422514	12423050	ptDNA	NC_001320.1	49268..49801	-	98.33
AzucenaRS1	ONG0400180	Chr4	12423051	12423349	ptDNA	NC_001320.1	87266..87570	-	97.38
AzucenaRS1	ONG0400180	Chr4	12423051	12423349	ptDNA	NC_001320.1	127548..127852	+	97.38
AzucenaRS1	ONG0400180	Chr4	12423758	12423826	mtDNA	NC_011033.1	314908..314976	+	100
AzucenaRS1	ONG0400180	Chr4	12423826	12423938	mtDNA	NC_011033.1	49295..49407	+	100
AzucenaRS1	ONG0400180	Chr4	12423988	12424158	mtDNA	NC_011033.1	434481..434651	+	98.83
AzucenaRS1	ONG0400180	Chr4	12424158	12424234	mtDNA	NC_011033.1	428039..428115	+	98.7
AzucenaRS1	ONG0400180	Chr4	12424236	12424321	mtDNA	NC_011033.1	429615..429700	-	98.84
AzucenaRS1	ONG0400180	Chr4	12424322	12424439	mtDNA	NC_011033.1	427188..427301	-	96.61
AzucenaRS1	ONG0400180	Chr4	12424437	12424495	mtDNA	NC_011033.1	55501..55559	+	100
AzucenaRS1	ONG0400210	Chr4	9637757	9638374	mtDNA	NC_011033.1	77906..78525	+	91.63
AzucenaRS1	ONG0400210	Chr4	9638440	9638723	mtDNA	NC_011033.1	296655..296936	+	90.49
AzucenaRS1	ONG0400220	Chr4	9700884	9701704	ptDNA	NC_001320.1	17684..18506	-	97.82
AzucenaRS1	ONG0400220	Chr4	9701704	9702066	ptDNA	NC_001320.1	14968..15330	-	96.98
AzucenaRS1	ONG0400230	Chr4	9728273	9728371	mtDNA	NC_011033.1	351212..351310	-	98.99
AzucenaRS1	ONG0400240	Chr4	9785114	9785256	mtDNA	NC_011033.1	177207..177349	-	95.1
AzucenaRS1	ONG0400250	Chr4	9796201	9796332	mtDNA	NC_011033.1	177056..177190	-	91.11
AzucenaRS1	ONG0400260	Chr4	9907622	9908003	ptDNA	NC_001320.1	20988..21385	-	88.03
AzucenaRS1	ONG0400280	Chr4	10268514	10268618	ptDNA	NC_001320.1	80296..80400	-	96.19
AzucenaRS1	ONG0400290	Chr4	10495608	10495955	ptDNA	NC_001320.1	113198..113545	+	96.56
AzucenaRS1	ONG0400300	Chr4	10991630	10992187	mtDNA	NC_011033.1	371769..372326	-	100
AzucenaRS1	ONG0400310	Chr4	12048499	12048832	ptDNA	NC_001320.1	48153..48485	+	96.41
AzucenaRS1	ONG0400320	Chr4	12274404	12274734	mtDNA	NC_011033.1	79846..80180	+	91.45
AzucenaRS1	ONG0400330	Chr4	12640240	12640549	mtDNA	NC_011033.1	31194..31503	-	91.67
AzucenaRS1	ONG0400350	Chr4	13199457	13199539	ptDNA	NC_001320.1	65718..65795	+	92.77
AzucenaRS1	ONG0400370	Chr4	14685797	14686244	mtDNA	NC_011033.1	212337..212779	-	95.77
AzucenaRS1	ONG0400380	Chr4	14897519	14897736	mtDNA	NC_011033.1	114495..114711	-	91.28
AzucenaRS1	ONG0400380	Chr4	14897998	14898110	mtDNA	NC_011033.1	109755..109867	+	92.92
AzucenaRS1	ONG0400380	Chr4	14898105	14898264	mtDNA	NC_011033.1	88496..88655	+	91.88
AzucenaRS1	ONG0400390	Chr4	15416183	15416338	ptDNA	NC_001320.1	94167..94328	-	88.96
AzucenaRS1	ONG0400400	Chr4	15645971	15646073	mtDNA	NC_011033.1	49362..49458	-	93.2
AzucenaRS1	ONG0400410	Chr4	16101825	16102090	ptDNA	NC_001320.1	57873..58164	+	84.59
AzucenaRS1	ONG0400430	Chr4	16605258	16605390	mtDNA	NC_011033.1	358643..358775	+	99.25
AzucenaRS1	ONG0400440	Chr4	16631533	16631850	mtDNA	NC_011033.1	395715..396032	+	96.86
AzucenaRS1	ONG0400450	Chr4	17084968	17085054	mtDNA	NC_011033.1	269868..269955	+	97.73
AzucenaRS1	ONG0400460	Chr4	17137133	17137465	mtDNA	NC_011033.1	321781..322083	+	85.03
AzucenaRS1	ONG0400470	Chr4	17155040	17155164	mtDNA	NC_011033.1	265281..265406	+	98.41
AzucenaRS1	ONG0400480	Chr4	17404259	17404475	mtDNA	NC_011033.1	269185..269401	-	91.36
AzucenaRS1	ONG0400480	Chr4	17404485	17404581	mtDNA	NC_011033.1	89582..89678	+	96.91
AzucenaRS1	ONG0400490	Chr4	17518169	17523305	ptDNA	NC_001320.1	124501..129647	-	98.74
AzucenaRS1	ONG0400500	Chr4	17580946	17581370	ptDNA	NC_001320.1	26315..26757	-	91.22
AzucenaRS1	ONG0400510	Chr4	18358109	18358331	mtDNA	NC_011033.1	221466..221688	+	92.83
AzucenaRS1	ONG0400520	Chr4	18402949	18403252	ptDNA	NC_001320.1	72723..73040	-	88.24
AzucenaRS1	ONG0400530	Chr4	18919121	18919186	mtDNA	NC_011033.1	77431..77496	+	98.48
AzucenaRS1	ONG0400530	Chr4	18919187	18919290	mtDNA	NC_011033.1	196824..196927	+	100
AzucenaRS1	ONG0400530	Chr4	18919292	18919376	mtDNA	NC_011033.1	63041..63125	+	98.82
AzucenaRS1	ONG0400530	Chr4	18919377	18919464	mtDNA	NC_011033.1	162830..162917	-	100
AzucenaRS1	ONG0400530	Chr4	18919463	18919518	mtDNA	NC_011033.1	388347..388402	-	100
AzucenaRS1	ONG0400540	Chr4	19011417	19011486	mtDNA	NC_011033.1	85703..85772	-	100
AzucenaRS1	ONG0400540	Chr4	19011486	19011633	mtDNA	NC_011033.1	376726..376873	-	99.32
AzucenaRS1	ONG0400560	Chr4	19689161	19689225	ptDNA	NC_001320.1	134479..134525,1..17	-	96.92
AzucenaRS1	ONG0400570	Chr4	20230875	20231057	ptDNA	NC_001320.1	5674..5857	-	91.85
AzucenaRS1	ONG0400580	Chr4	20278333	20278458	mtDNA	NC_011033.1	229792..229917	-	96.83
AzucenaRS1	ONG0400590	Chr4	20296416	20296628	ptDNA	NC_001320.1	111028..111238	-	90.14
AzucenaRS1	ONG0400600	Chr4	20727082	20727206	mtDNA	NC_011033.1	463099..463223	-	96.8
AzucenaRS1	ONG0400600	Chr4	20727206	20727389	mtDNA	NC_011033.1	486159..486342	-	97.28
AzucenaRS1	ONG0400610	Chr4	20765042	20765238	mtDNA	NC_011033.1	340502..340699	+	98.99
AzucenaRS1	ONG0400610	Chr4	20765042	20765238	mtDNA	NC_011033.1	421589..421786	+	98.99
AzucenaRS1	ONG0400620	Chr4	21113226	21113371	ptDNA	NC_001320.1	54169..54314	-	87.67
AzucenaRS1	ONG0400630	Chr4	21405361	21405661	ptDNA	NC_001320.1	19380..19680	+	93.69
AzucenaRS1	ONG0400630	Chr4	21409788	21409958	ptDNA	NC_001320.1	100481..100651	+	98.83
AzucenaRS1	ONG0400640	Chr4	21783571	21783686	mtDNA	NC_011033.1	335321..335436	-	99.14
AzucenaRS1	ONG0400650	Chr4	22218501	22222237	ptDNA	NC_001320.1	112322..116059	+	99.12
AzucenaRS1	ONG0400650	Chr4	22222233	22222315	ptDNA	NC_001320.1	6808..6890	+	100
AzucenaRS1	ONG0400650	Chr4	22225486	22226218	ptDNA	NC_001320.1	122565..123297	+	99.05
AzucenaRS1	ONG0400650	Chr4	22226223	22226963	ptDNA	NC_001320.1	20297..21036	-	98.92
AzucenaRS1	ONG0400650	Chr4	22226960	22229185	ptDNA	NC_001320.1	3148..5422	+	97.28
AzucenaRS1	ONG0400650	Chr4	22229222	22229792	ptDNA	NC_001320.1	130530..131101	-	98.95
AzucenaRS1	ONG0400650	Chr4	22229792	22232131	ptDNA	NC_001320.1	127885..130225	-	99.02
AzucenaRS1	ONG0400650	Chr4	22235277	22235442	ptDNA	NC_001320.1	87229..87394	+	100
AzucenaRS1	ONG0400650	Chr4	22235440	22235914	ptDNA	NC_001320.1	16..490	-	98.95
AzucenaRS1	ONG0400650	Chr4	22235917	22239186	ptDNA	NC_001320.1	80593..83863	+	99.21
AzucenaRS1	ONG0400650	Chr4	22239192	22239710	ptDNA	NC_001320.1	97036..97552	-	98.65
AzucenaRS1	ONG0400650	Chr4	22239708	22240032	ptDNA	NC_001320.1	109029..109353	-	98.77
AzucenaRS1	ONG0400650	Chr4	22240103	22241000	ptDNA	NC_001320.1	8623..9521	-	99
AzucenaRS1	ONG0400650	Chr4	22241003	22241430	ptDNA	NC_001320.1	26207..26634	-	99.77
AzucenaRS1	ONG0400650	Chr4	22241428	22242095	ptDNA	NC_001320.1	49365..50031	+	98.65
AzucenaRS1	ONG0400650	Chr4	22242096	22242217	ptDNA	NC_001320.1	50185..50306	+	98.36
AzucenaRS1	ONG0400660	Chr4	22726276	22726686	ptDNA	NC_001320.1	2976..3387	+	87.74
AzucenaRS1	ONG0400670	Chr4	23257186	23257332	mtDNA	NC_011033.1	377638..377784	+	98.64
AzucenaRS1	ONG0400680	Chr4	23552587	23552790	mtDNA	NC_011033.1	388757..388960	-	99.51
AzucenaRS1	ONG0400690	Chr4	23786737	23786843	ptDNA	NC_001320.1	119348..119454	+	94.39
AzucenaRS1	ONG0400700	Chr4	23903961	23904070	mtDNA	NC_011033.1	290815..290924	-	96.36
AzucenaRS1	ONG0400700	Chr4	23904064	23904162	mtDNA	NC_011033.1	404352..404450	+	95
AzucenaRS1	ONG0400710	Chr4	24257102	24257268	ptDNA	NC_001320.1	127561..127722	+	92.81
AzucenaRS1	ONG0400720	Chr4	24445957	24446044	mtDNA	NC_011033.1	373009..373096	+	97.73
AzucenaRS1	ONG0400730	Chr4	24630887	24631189	ptDNA	NC_001320.1	64395..64696	-	86.45
AzucenaRS1	ONG0400740	Chr4	24678534	24678589	ptDNA	NC_001320.1	86760..86816	-	98.25
AzucenaRS1	ONG0400740	Chr4	24678534	24678589	ptDNA	NC_001320.1	128302..128358	+	98.25
AzucenaRS1	ONG0400750	Chr4	24935779	24935898	ptDNA	NC_001320.1	48345..48461	+	88.43
AzucenaRS1	ONG0400760	Chr4	26021387	26021659	ptDNA	NC_001320.1	57194..57468	-	87.1
AzucenaRS1	ONG0400770	Chr4	26063115	26063347	mtDNA	NC_011033.1	56357..56589	+	98.28
AzucenaRS1	ONG0400780	Chr4	26100589	26100976	ptDNA	NC_001320.1	23945..24332	+	100
AzucenaRS1	ONG0400790	Chr4	26215336	26215730	mtDNA	NC_011033.1	407948..408340	-	98.23
AzucenaRS1	ONG0400800	Chr4	26564880	26564945	mtDNA	NC_011033.1	80590..80659	-	94.29
AzucenaRS1	ONG0400810	Chr4	27341739	27341801	mtDNA	NC_011033.1	415733..415795	+	96.83
AzucenaRS1	ONG0400820	Chr4	28962502	28962560	ptDNA	NC_001320.1	99561..99619	+	98.31
AzucenaRS1	ONG0400830	Chr4	29083916	29084395	mtDNA	NC_011033.1	87610..88089	-	99.38
AzucenaRS1	ONG0400840	Chr4	29237907	29237957	ptDNA	NC_001320.1	50699..50749	+	98.04
AzucenaRS1	ONG0400850	Chr4	29745647	29745882	mtDNA	NC_011033.1	156968..157203	-	99.58
AzucenaRS1	ONG0400860	Chr4	31164136	31164216	mtDNA	NC_011033.1	344059..344139	-	96.3
AzucenaRS1	ONG0400870	Chr4	31534084	31535369	mtDNA	NC_011033.1	272361..273647	+	99.07
AzucenaRS1	ONG0400870	Chr4	31541100	31544949	mtDNA	NC_011033.1	307353..311211	+	97.52
AzucenaRS1	ONG0400870	Chr4	31547751	31548129	mtDNA	NC_011033.1	311206..311584	+	98.95
AzucenaRS1	ONG0400870	Chr4	31548122	31548973	mtDNA	NC_011033.1	311613..312464	+	99.41
AzucenaRS1	ONG0400870	Chr4	31549219	31550006	mtDNA	NC_011033.1	486804..487595	-	98.61
AzucenaRS1	ONG0400870	Chr4	31553400	31555055	mtDNA	NC_011033.1	485157..486812	-	99.09
AzucenaRS1	ONG0400870	Chr4	31556607	31558858	mtDNA	NC_011033.1	410371..412626	+	98.72
AzucenaRS1	ONG0400870	Chr4	31558855	31560447	mtDNA	NC_011033.1	412734..414364	+	95.49
AzucenaRS1	ONG0400870	Chr4	31563437	31566168	mtDNA	NC_011033.1	414364..417090	+	98.57
AzucenaRS1	ONG0400870	Chr4	31520942	31524676	mtDNA	NC_011033.1	268620..272365	+	98.64
AzucenaRS1	ONG0400870	Chr4	31536301	31541096	mtDNA	NC_011033.1	257824..262601	-	98.42
AzucenaRS1	ONG0400870	Chr4	31555056	31556616	mtDNA	NC_011033.1	483465..485042	-	98.1
AzucenaRS1	ONG0400880	Chr4	32065888	32066133	mtDNA	NC_011033.1	254844..255094	+	89.06
AzucenaRS1	ONG0400890	Chr4	32404337	32404495	mtDNA	NC_011033.1	179166..179324	-	97.48
AzucenaRS1	ONG0400890	Chr4	32404493	32404717	mtDNA	NC_011033.1	336101..336325	-	96.44
AzucenaRS1	ONG0400900	Chr4	32966031	32966224	ptDNA	NC_001320.1	26727..26921	-	97.95
AzucenaRS1	ONG0400910	Chr4	33536620	33536702	ptDNA	NC_001320.1	90625..90705	+	92.77
AzucenaRS1	ONG0500020	Chr5	710928	711062	mtDNA	NC_011033.1	288144..288277	-	94.07
AzucenaRS1	ONG0500020	Chr5	711063	711165	mtDNA	NC_011033.1	348412..348514	+	96.12
AzucenaRS1	ONG0500020	Chr5	711191	711411	mtDNA	NC_011033.1	229657..229878	+	96.85
AzucenaRS1	ONG0500020	Chr5	711412	711556	mtDNA	NC_011033.1	295354..295498	-	95.86
AzucenaRS1	ONG0500030	Chr5	904139	906728	ptDNA	NC_001320.1	90009..92599	-	99.31
AzucenaRS1	ONG0500040	Chr5	1232600	1232853	ptDNA	NC_001320.1	87912..88169	-	85.66
AzucenaRS1	ONG0500050	Chr5	2466276	2466332	ptDNA	NC_001320.1	3575..3631	-	98.25
AzucenaRS1	ONG0500060	Chr5	2613297	2613374	mtDNA	NC_011033.1	314850..314927	+	100
AzucenaRS1	ONG0500070	Chr5	2869656	2869947	ptDNA	NC_001320.1	83504..83794	+	89.42
AzucenaRS1	ONG0500080	Chr5	3023404	3023604	ptDNA	NC_001320.1	77362..77562	-	99.5
AzucenaRS1	ONG0500090	Chr5	3096598	3096970	ptDNA	NC_001320.1	77267..77650	+	86.3
AzucenaRS1	ONG0500100	Chr5	3496160	3496331	mtDNA	NC_011033.1	266031..266203	-	95.38
AzucenaRS1	ONG0500110	Chr5	3801209	3801623	mtDNA	NC_011033.1	371665..372093	-	85.12
AzucenaRS1	ONG0500120	Chr5	3809793	3810152	mtDNA	NC_011033.1	376888..377269	-	83.72
AzucenaRS1	ONG0500130	Chr5	4924404	4924767	mtDNA	NC_011033.1	212571..212933	+	94.79
AzucenaRS1	ONG0500150	Chr5	5304876	5305029	ptDNA	NC_001320.1	29363..29518	+	92.95
AzucenaRS1	ONG0500160	Chr5	5793109	5793160	mtDNA	NC_011033.1	190919..190970	+	100
AzucenaRS1	ONG0500160	Chr5	5793198	5793286	mtDNA	NC_011033.1	399673..399761	-	98.88
AzucenaRS1	ONG0500160	Chr5	5793328	5793442	mtDNA	NC_011033.1	15330..15444	+	98.26
AzucenaRS1	ONG0500160	Chr5	5793479	5793545	mtDNA	NC_011033.1	270056..270122	-	98.51
AzucenaRS1	ONG0500170	Chr5	5865554	5865698	mtDNA	NC_011033.1	159387..159531	-	95.86
AzucenaRS1	ONG0500180	Chr5	6792427	6792601	mtDNA	NC_011033.1	187809..187983	-	96.57
AzucenaRS1	ONG0500200	Chr5	8324154	8324218	mtDNA	NC_011033.1	241257..241321	-	98.46
AzucenaRS1	ONG0500200	Chr5	8324219	8324322	mtDNA	NC_011033.1	283913..284016	-	99.04
AzucenaRS1	ONG0500210	Chr5	8418099	8418308	ptDNA	NC_001320.1	125438..125644	-	95.24
AzucenaRS1	ONG0500210	Chr5	8419233	8419489	ptDNA	NC_001320.1	107017..107291	+	82.62
AzucenaRS1	ONG0500210	Chr5	8419233	8419489	ptDNA	NC_001320.1	107017..107291	+	82.62
AzucenaRS1	ONG0500220	Chr5	9330397	9330695	mtDNA	NC_011033.1	100701..100992	+	90.97
AzucenaRS1	ONG0500230	Chr5	9546251	9546321	ptDNA	NC_001320.1	130001..130071	-	100
AzucenaRS1	ONG0500230	Chr5	9546322	9546416	mtDNA	NC_011033.1	171621..171715	+	98.95
AzucenaRS1	ONG0500240	Chr5	9673716	9673771	mtDNA	NC_011033.1	66309..66364	-	100
AzucenaRS1	ONG0500250	Chr5	9754005	9754126	mtDNA	NC_011033.1	49219..49340	+	99.18
AzucenaRS1	ONG0500260	Chr5	11227740	11228226	ptDNA	NC_001320.1	23937..24425	+	91.5
AzucenaRS1	ONG0500270	Chr5	12970075	12970164	ptDNA	NC_001320.1	18219..18310	-	97.83
AzucenaRS1	ONG0500280	Chr5	13075974	13076119	mtDNA	NC_011033.1	402832..402976	+	95.89
AzucenaRS1	ONG0500300	Chr5	14119836	14120372	mtDNA	NC_011033.1	189307..189812	-	87.57
AzucenaRS1	ONG0500310	Chr5	14422571	14422643	ptDNA	NC_001320.1	16294..16368	-	97.33
AzucenaRS1	ONG0500320	Chr5	14996038	14996471	ptDNA	NC_001320.1	121794..122240	+	93.1
AzucenaRS1	ONG0500330	Chr5	15080953	15081037	mtDNA	NC_011033.1	110857..110941	-	98.82
AzucenaRS1	ONG0500330	Chr5	15081038	15081093	mtDNA	NC_011033.1	133253..133308	+	100
AzucenaRS1	ONG0500340	Chr5	16498674	16498929	mtDNA	NC_011033.1	359095..359350	+	99.22
AzucenaRS1	ONG0500350	Chr5	16498674	16498929	mtDNA	NC_011033.1	359095..359350	+	99.22
AzucenaRS1	ONG0500350	Chr5	16553781	16554036	mtDNA	NC_011033.1	359095..359350	-	99.22
AzucenaRS1	ONG0500360	Chr5	17067385	17067487	ptDNA	NC_001320.1	99934..100036	-	95.15
AzucenaRS1	ONG0500370	Chr5	17548223	17548370	mtDNA	NC_011033.1	212024..212172	-	95.3
AzucenaRS1	ONG0500380	Chr5	18366654	18366973	ptDNA	NC_001320.1	103089..103421	-	89.05
AzucenaRS1	ONG0500390	Chr5	18865773	18866015	mtDNA	NC_011033.1	319857..320098	+	95.88
AzucenaRS1	ONG0500390	Chr5	18866142	18866251	mtDNA	NC_011033.1	166021..166129	+	97.27
AzucenaRS1	ONG0500400	Chr5	18908046	18908351	mtDNA	NC_011033.1	316249..316554	-	97.39
AzucenaRS1	ONG0500410	Chr5	19463126	19463230	mtDNA	NC_011033.1	292371..292475	+	100
AzucenaRS1	ONG0500420	Chr5	20123539	20123690	mtDNA	NC_011033.1	108041..108190	-	94.08
AzucenaRS1	ONG0500440	Chr5	20653056	20656446	ptDNA	NC_001320.1	76133..79557	+	97.58
AzucenaRS1	ONG0500450	Chr5	20868145	20868205	ptDNA	NC_001320.1	66889..66949	+	100
AzucenaRS1	ONG0500460	Chr5	20928866	20929006	mtDNA	NC_011033.1	283147..283280	-	92.91
AzucenaRS1	ONG0500470	Chr5	21975016	21978099	ptDNA	NC_001320.1	51953..55045	+	97.62
AzucenaRS1	ONG0500470	Chr5	21978099	21978456	ptDNA	NC_001320.1	101411..101768	+	97.21
AzucenaRS1	ONG0500480	Chr5	22005705	22005758	mtDNA	NC_011033.1	348076..348128	-	98.15
AzucenaRS1	ONG0500490	Chr5	22229408	22229487	mtDNA	NC_011033.1	348769..348848	+	100
AzucenaRS1	ONG0500500	Chr5	25041413	25041744	mtDNA	NC_011033.1	170772..171103	+	99.7
AzucenaRS1	ONG0500510	Chr5	25196817	25197051	mtDNA	NC_011033.1	139437..139672	-	97.88
AzucenaRS1	ONG0500520	Chr5	25497529	25497642	ptDNA	NC_001320.1	4291..4402	-	94.74
AzucenaRS1	ONG0500530	Chr5	25529427	25529702	ptDNA	NC_001320.1	46888..47167	-	84.1
AzucenaRS1	ONG0500540	Chr5	26290934	26291178	mtDNA	NC_011033.1	353514..353750	+	88.16
AzucenaRS1	ONG0500550	Chr5	26412858	26412994	ptDNA	NC_001320.1	128418..128560	-	89.51
AzucenaRS1	ONG0500560	Chr5	26953546	26953708	mtDNA	NC_011033.1	101459..101621	+	97.55
AzucenaRS1	ONG0500580	Chr5	29686863	29687026	ptDNA	NC_001320.1	107785..107947	-	92.17
AzucenaRS1	ONG0500590	Chr5	30443485	30443567	mtDNA	NC_011033.1	117873..117955	+	97.59
AzucenaRS1	ONG0500600	Chr5	30450799	30451109	ptDNA	NC_001320.1	74235..74545	-	98.39
AzucenaRS1	ONG0500600	Chr5	30454345	30454425	ptDNA	NC_001320.1	20732..20812	+	98.77
AzucenaRS1	ONG0500610	Chr5	30522567	30522662	ptDNA	NC_001320.1	76590..76686	+	96.91
AzucenaRS1	ONG0600010	Chr6	504270	504500	ptDNA	NC_001320.1	8591..8820	+	97.84
AzucenaRS1	ONG0600020	Chr6	1365757	1367052	ptDNA	NC_001320.1	50976..52271	+	99.15
AzucenaRS1	ONG0600020	Chr6	1370204	1370765	ptDNA	NC_001320.1	52267..52747	+	85.23
AzucenaRS1	ONG0600030	Chr6	2693209	2693301	mtDNA	NC_011033.1	178270..178362	-	98.92
AzucenaRS1	ONG0600040	Chr6	3956753	3956805	ptDNA	NC_001320.1	36756..36808	+	100
AzucenaRS1	ONG0600050	Chr6	4141305	4141966	ptDNA	NC_001320.1	7126..7780	-	96.54
AzucenaRS1	ONG0600060	Chr6	4204810	4205504	mtDNA	NC_011033.1	299828..300513	+	87.63
AzucenaRS1	ONG0600060	Chr6	4205885	4206039	mtDNA	NC_011033.1	300919..301074	+	90.38
AzucenaRS1	ONG0600060	Chr6	4206735	4207093	mtDNA	NC_011033.1	301804..302158	+	83.98
AzucenaRS1	ONG0600060	Chr6	4207331	4207751	mtDNA	NC_011033.1	302344..302763	+	85.71
AzucenaRS1	ONG0600070	Chr6	4836206	4836320	mtDNA	NC_011033.1	13413..13528	-	93.97
AzucenaRS1	ONG0600080	Chr6	5078635	5078702	mtDNA	NC_011033.1	445316..445383	+	100
AzucenaRS1	ONG0600090	Chr6	5658923	5659017	mtDNA	NC_011033.1	317411..317505	-	97.89
AzucenaRS1	ONG0600100	Chr6	6067654	6067712	ptDNA	NC_001320.1	15469..15528	+	93.33
AzucenaRS1	ONG0600100	Chr6	6067712	6068024	ptDNA	NC_001320.1	32255..32557	-	85.49
AzucenaRS1	ONG0600110	Chr6	6878419	6878509	mtDNA	NC_011033.1	125798..125888	-	97.8
AzucenaRS1	ONG0600120	Chr6	6939128	6939323	ptDNA	NC_001320.1	7306..7501	-	97.96
AzucenaRS1	ONG0600130	Chr6	7252136	7252549	ptDNA	NC_001320.1	129967..130426	-	86.67
AzucenaRS1	ONG0600140	Chr6	7684850	7685110	mtDNA	NC_011033.1	293891..294152	-	91.25
AzucenaRS1	ONG0600140	Chr6	7684850	7685110	ptDNA	NC_001320.1	19419..19680	+	91.63
AzucenaRS1	ONG0600140	Chr11	16644815	16644993	ptDNA	NC_001320.1	19419..19595	+	88.4
AzucenaRS1	ONG0600140	Chr11	16649583	16649847	ptDNA	NC_001320.1	19419..19680	+	89.14
AzucenaRS1	ONG0600150	Chr6	7730209	7730305	mtDNA	NC_011033.1	403795..403891	-	95.88
AzucenaRS1	ONG0600160	Chr6	8607943	8608059	mtDNA	NC_011033.1	75005..75121	-	93.16
AzucenaRS1	ONG0600170	Chr6	9418466	9418523	mtDNA	NC_011033.1	454199..454256	-	100
AzucenaRS1	ONG0600170	Chr6	9418521	9418640	mtDNA	NC_011033.1	58749..58868	-	98.33
AzucenaRS1	ONG0600170	Chr6	9418642	9418765	mtDNA	NC_011033.1	360870..360993	-	99.19
AzucenaRS1	ONG0600170	Chr6	9418765	9418920	mtDNA	NC_011033.1	344542..344697	+	99.36
AzucenaRS1	ONG0600170	Chr6	9418916	9419095	mtDNA	NC_011033.1	271330..271509	-	97.78
AzucenaRS1	ONG0600170	Chr6	9419095	9419179	mtDNA	NC_011033.1	172522..172606	-	100
AzucenaRS1	ONG0600170	Chr6	9419178	9419307	mtDNA	NC_011033.1	303434..303563	+	98.46
AzucenaRS1	ONG0600170	Chr6	9419396	9419487	mtDNA	NC_011033.1	289701..289792	+	97.83
AzucenaRS1	ONG0600170	Chr6	9419486	9419594	mtDNA	NC_011033.1	350618..350726	-	100
AzucenaRS1	ONG0600170	Chr6	9419705	9419914	mtDNA	NC_011033.1	410695..410904	-	99.52
AzucenaRS1	ONG0600170	Chr6	9420001	9420097	mtDNA	NC_011033.1	413316..413412	+	100
AzucenaRS1	ONG0600170	Chr6	9420143	9420275	mtDNA	NC_011033.1	397977..398109	-	100
AzucenaRS1	ONG0600170	Chr6	9420275	9420364	mtDNA	NC_011033.1	263441..263530	-	97.78
AzucenaRS1	ONG0600170	Chr6	9420559	9420760	mtDNA	NC_011033.1	127400..127601	+	99.01
AzucenaRS1	ONG0600170	Chr6	9420831	9420942	mtDNA	NC_011033.1	382857..382968	+	99.11
AzucenaRS1	ONG0600170	Chr6	9420941	9420999	mtDNA	NC_011033.1	260844..260902	-	100
AzucenaRS1	ONG0600170	Chr6	9420999	9421059	mtDNA	NC_011033.1	330596..330656	+	100
AzucenaRS1	ONG0600170	Chr6	9421149	9421246	mtDNA	NC_011033.1	270767..270864	+	100
AzucenaRS1	ONG0600170	Chr6	9421245	9421334	ptDNA	NC_001320.1	126760..126849	+	100
AzucenaRS1	ONG0600170	Chr6	9421332	9421440	mtDNA	NC_011033.1	293508..293616	-	97.25
AzucenaRS1	ONG0600170	Chr6	9421545	9421680	mtDNA	NC_011033.1	347167..347302	+	99.26
AzucenaRS1	ONG0600170	Chr6	9421681	9421770	mtDNA	NC_011033.1	386170..386259	+	95.56
AzucenaRS1	ONG0600170	Chr6	9421901	9421995	mtDNA	NC_011033.1	354978..355072	+	100
AzucenaRS1	ONG0600170	Chr6	9421996	9422058	mtDNA	NC_011033.1	331410..331472	+	100
AzucenaRS1	ONG0600170	Chr6	9422057	9422264	mtDNA	NC_011033.1	352071..352278	-	99.52
AzucenaRS1	ONG0600170	Chr6	9422264	9422354	mtDNA	NC_011033.1	337957..338047	+	98.9
AzucenaRS1	ONG0600170	Chr6	9422355	9422530	mtDNA	NC_011033.1	270005..270180	+	100
AzucenaRS1	ONG0600170	Chr6	9422528	9422626	ptDNA	NC_001320.1	20595..20692	-	98.99
AzucenaRS1	ONG0600170	Chr6	9422625	9422762	ptDNA	NC_001320.1	251..388	+	99.28
AzucenaRS1	ONG0600170	Chr6	9422763	9422890	mtDNA	NC_011033.1	391747..391875	-	99.22
AzucenaRS1	ONG0600170	Chr6	9422891	9422985	mtDNA	NC_011033.1	366584..366678	-	98.95
AzucenaRS1	ONG0600170	Chr6	9420757	9420830	mtDNA	NC_011033.1	278880..278953	-	100
AzucenaRS1	ONG0600200	Chr6	10909521	10909855	mtDNA	NC_011033.1	282878..283211	-	92.24
AzucenaRS1	ONG0600210	Chr6	11105110	11105212	ptDNA	NC_001320.1	45987..46089	+	99.03
AzucenaRS1	ONG0600210	Chr6	11105210	11105400	mtDNA	NC_011033.1	233817..234007	-	99.48
AzucenaRS1	ONG0600210	Chr6	11105437	11105523	mtDNA	NC_011033.1	167365..167451	-	100
AzucenaRS1	ONG0600220	Chr6	11496987	11497060	mtDNA	NC_011033.1	244946..245019	-	97.3
AzucenaRS1	ONG0600230	Chr6	11539552	11539936	ptDNA	NC_001320.1	47455..47839	-	97.16
AzucenaRS1	ONG0600230	Chr4	19453659	19454043	ptDNA	NC_001320.1	47455..47839	+	97.42
AzucenaRS1	ONG0600240	Chr6	11975330	11975632	mtDNA	NC_011033.1	248241..248538	-	91.75
AzucenaRS1	ONG0600250	Chr6	12277939	12278650	mtDNA	NC_011033.1	62524..63235	-	99.3
AzucenaRS1	ONG0600250	Chr6	12278646	12280015	mtDNA	NC_011033.1	191258..192626	+	98.32
AzucenaRS1	ONG0600250	Chr6	12289482	12295495	mtDNA	NC_011033.1	196006..202010	+	97.06
AzucenaRS1	ONG0600250	Chr6	12295492	12298933	mtDNA	NC_011033.1	202615..206048	+	98.46
AzucenaRS1	ONG0600250	Chr6	12298993	12299228	mtDNA	NC_011033.1	206274..206509	+	97.46
AzucenaRS1	ONG0600250	Chr6	12267921	12277939	mtDNA	NC_011033.1	41292..51268	+	97.71
AzucenaRS1	ONG0600250	Chr6	12285859	12289250	mtDNA	NC_011033.1	192621..196013	+	98.82
AzucenaRS1	ONG0600260	Chr6	12506511	12509730	ptDNA	NC_001320.1	48055..51270	-	98.23
AzucenaRS1	ONG0600270	Chr6	17282196	17282314	mtDNA	NC_011033.1	326028..326147	+	87.5
AzucenaRS1	ONG0600280	Chr6	17164043	17164176	ptDNA	NC_001320.1	43199..43342	+	88.89
AzucenaRS1	ONG0600290	Chr6	17118954	17119143	ptDNA	NC_001320.1	94003..94193	+	94.24
AzucenaRS1	ONG0600300	Chr6	17054780	17055213	mtDNA	NC_011033.1	289443..289876	-	91.95
AzucenaRS1	ONG0600310	Chr6	16814286	16814372	mtDNA	NC_011033.1	373604..373691	+	95.51
AzucenaRS1	ONG0600310	Chr6	16815189	16815371	mtDNA	NC_011033.1	302573..302782	-	82.38
AzucenaRS1	ONG0600310	Chr6	16815381	16815994	mtDNA	NC_011033.1	299828..300457	-	87.21
AzucenaRS1	ONG0600320	Chr6	16795672	16795821	mtDNA	NC_011033.1	301695..301844	+	96
AzucenaRS1	ONG0600330	Chr6	16730320	16730560	mtDNA	NC_011033.1	280960..281212	-	90.16
AzucenaRS1	ONG0600340	Chr6	16339804	16339880	mtDNA	NC_011033.1	364827..364903	+	98.7
AzucenaRS1	ONG0600340	Chr6	16339881	16340099	mtDNA	NC_011033.1	350892..351110	+	98.63
AzucenaRS1	ONG0600340	Chr6	16340100	16340158	mtDNA	NC_011033.1	54187..54245	+	100
AzucenaRS1	ONG0600340	Chr6	16340159	16340224	mtDNA	NC_011033.1	188583..188648	+	98.48
AzucenaRS1	ONG0600340	Chr6	16340225	16340457	mtDNA	NC_011033.1	95824..96056	-	99.14
AzucenaRS1	ONG0600340	Chr6	16340458	16340536	mtDNA	NC_011033.1	205329..205407	-	97.47
AzucenaRS1	ONG0600350	Chr6	15980428	15980571	ptDNA	NC_001320.1	127536..127679	-	96.53
AzucenaRS1	ONG0600350	Chr6	15980574	15980669	ptDNA	NC_001320.1	112124..112219	+	98.96
AzucenaRS1	ONG0600350	Chr6	15980668	15980869	ptDNA	NC_001320.1	3163..3357	-	92.08
AzucenaRS1	ONG0600350	Chr6	15980871	15981042	mtDNA	NC_011033.1	159616..159787	+	94.77
AzucenaRS1	ONG0600350	Chr6	15983697	15983874	ptDNA	NC_001320.1	107452..107631	+	94.44
AzucenaRS1	ONG0600350	Chr6	15983872	15983988	ptDNA	NC_001320.1	130362..130478	+	95.73
AzucenaRS1	ONG0600350	Chr6	15983989	15984133	mtDNA	NC_011033.1	374674..374818	+	95.86
AzucenaRS1	ONG0600350	Chr6	15984131	15984224	ptDNA	NC_001320.1	69111..69204	+	96.81
AzucenaRS1	ONG0600360	Chr6	14720776	14720985	ptDNA	NC_001320.1	114969..115177	-	98.57
AzucenaRS1	ONG0600370	Chr6	14485833	14485920	mtDNA	NC_011033.1	372328..372415	+	95.45
AzucenaRS1	ONG0600380	Chr6	14460160	14460760	mtDNA	NC_011033.1	201402..201992	-	94.37
AzucenaRS1	ONG0600380	Chr6	14460758	14461043	mtDNA	NC_011033.1	368731..369016	+	99.65
AzucenaRS1	ONG0600380	Chr6	14461634	14461761	mtDNA	NC_011033.1	237383..237510	-	100
AzucenaRS1	ONG0600390	Chr6	14142922	14143006	mtDNA	NC_011033.1	118722..118807	-	97.67
AzucenaRS1	ONG0600400	Chr6	14134208	14134317	ptDNA	NC_001320.1	76405..76514	-	100
AzucenaRS1	ONG0600410	Chr6	13767614	13767805	mtDNA	NC_011033.1	383120..383311	+	99.48
AzucenaRS1	ONG0600420	Chr6	13687043	13687131	mtDNA	NC_011033.1	48032..48120	+	96.63
AzucenaRS1	ONG0600420	Chr6	13687131	13687188	mtDNA	NC_011033.1	386855..386912	-	98.28
AzucenaRS1	ONG0600420	Chr6	13687186	13687349	mtDNA	NC_011033.1	295160..295323	+	100
AzucenaRS1	ONG0600430	Chr6	13359251	13359310	mtDNA	NC_011033.1	373526..373585	-	98.33
AzucenaRS1	ONG0600430	Chr6	13359253	13359432	mtDNA	NC_011033.1	307204..307383	+	97.78
AzucenaRS1	ONG0600430	Chr6	13359477	13359583	mtDNA	NC_011033.1	5623..5729	-	98.13
AzucenaRS1	ONG0600440	Chr6	13213079	13213173	mtDNA	NC_011033.1	402101..402195	-	98.95
AzucenaRS1	ONG0600450	Chr6	12954882	12954967	mtDNA	NC_011033.1	89999..90084	-	100
AzucenaRS1	ONG0600460	Chr6	17854702	17854769	mtDNA	NC_011033.1	390361..390429	+	98.55
AzucenaRS1	ONG0600470	Chr6	17957479	17957580	mtDNA	NC_011033.1	190067..190167	+	96.08
AzucenaRS1	ONG0600470	Chr6	17957579	17957694	ptDNA	NC_001320.1	94015..94130	+	96.55
AzucenaRS1	ONG0600480	Chr6	18896678	18897810	ptDNA	NC_001320.1	92409..93528	-	96.48
AzucenaRS1	ONG0600490	Chr6	19816307	19816389	ptDNA	NC_001320.1	70465..70547	-	95.18
AzucenaRS1	ONG0600490	Chr6	19818180	19818384	ptDNA	NC_001320.1	70261..70465	-	95.15
AzucenaRS1	ONG0600500	Chr6	20471476	20471566	ptDNA	NC_001320.1	131694..131784	+	94.51
AzucenaRS1	ONG0600510	Chr6	20978108	20978260	ptDNA	NC_001320.1	116352..116504	+	91.61
AzucenaRS1	ONG0600520	Chr6	21333977	21334351	ptDNA	NC_001320.1	4062..4435	+	97.61
AzucenaRS1	ONG0600530	Chr6	21685452	21685718	ptDNA	NC_001320.1	126768..127035	+	91.04
AzucenaRS1	ONG0600540	Chr6	22197920	22198116	ptDNA	NC_001320.1	8220..8415	-	97.97
AzucenaRS1	ONG0600560	Chr6	23013860	23013971	mtDNA	NC_011033.1	244881..244995	+	94.78
AzucenaRS1	ONG0600560	Chr6	23013970	23014052	mtDNA	NC_011033.1	80493..80575	-	100
AzucenaRS1	ONG0600580	Chr6	23715340	23715478	mtDNA	NC_011033.1	136457..136595	-	100
AzucenaRS1	ONG0600590	Chr6	23808148	23808271	ptDNA	NC_001320.1	124455..124577	+	94.4
AzucenaRS1	ONG0600600	Chr6	23830680	23830773	ptDNA	NC_001320.1	113936..114029	+	95.74
AzucenaRS1	ONG0600600	Chr6	23834563	23834933	mtDNA	NC_011033.1	126672..127058	+	86.73
AzucenaRS1	ONG0600610	Chr6	24656062	24656392	mtDNA	NC_011033.1	121108..121439	-	98.19
AzucenaRS1	ONG0600620	Chr6	24823908	24823988	mtDNA	NC_011033.1	106831..106911	+	97.53
AzucenaRS1	ONG0600630	Chr6	25846942	25847025	mtDNA	NC_011033.1	337164..337247	-	98.81
AzucenaRS1	ONG0600630	Chr6	25847024	25847088	ptDNA	NC_001320.1	118731..118795	+	100
AzucenaRS1	ONG0600630	Chr6	25847086	25847183	mtDNA	NC_011033.1	92075..92172	+	100
AzucenaRS1	ONG0600630	Chr6	25847175	25847264	ptDNA	NC_001320.1	100603..100692	+	97.78
AzucenaRS1	ONG0600630	Chr6	25847427	25847479	mtDNA	NC_011033.1	82065..82117	-	98.11
AzucenaRS1	ONG0600640	Chr6	25956139	25956266	mtDNA	NC_011033.1	285353..285480	+	100
AzucenaRS1	ONG0600650	Chr6	26172799	26172953	mtDNA	NC_011033.1	360186..360340	-	94.19
AzucenaRS1	ONG0600650	Chr6	26176336	26176484	ptDNA	NC_001320.1	8160..8308	+	98.67
AzucenaRS1	ONG0600650	Chr6	26176481	26176662	ptDNA	NC_001320.1	21689..21872	-	98.37
AzucenaRS1	ONG0600660	Chr6	26283329	26283515	mtDNA	NC_011033.1	267535..267716	+	90.91
AzucenaRS1	ONG0600670	Chr6	26610648	26610718	ptDNA	NC_001320.1	88608..88678	+	97.18
AzucenaRS1	ONG0600680	Chr6	27155874	27155957	ptDNA	NC_001320.1	130570..130653	+	98.81
AzucenaRS1	ONG0600690	Chr6	27280144	27280210	mtDNA	NC_011033.1	124638..124704	+	100
AzucenaRS1	ONG0600690	Chr6	27280252	27280318	mtDNA	NC_011033.1	124638..124704	+	100
AzucenaRS1	ONG0600700	Chr6	27293313	27293403	ptDNA	NC_001320.1	90684..90777	+	89.36
AzucenaRS1	ONG0600710	Chr6	28366094	28370300	ptDNA	NC_001320.1	104816..109022	+	99.76
AzucenaRS1	ONG0600720	Chr6	28447144	28447306	mtDNA	NC_011033.1	312288..312449	-	98.77
AzucenaRS1	ONG0600720	Chr6	28447306	28447416	ptDNA	NC_001320.1	128985..129095	-	99.1
AzucenaRS1	ONG0600720	Chr6	28447416	28447604	ptDNA	NC_001320.1	12530..12722	+	95.85
AzucenaRS1	ONG0600720	Chr6	28447607	28447725	ptDNA	NC_001320.1	24863..24981	-	98.32
AzucenaRS1	ONG0600720	Chr6	28447727	28447835	mtDNA	NC_011033.1	302534..302642	+	100
AzucenaRS1	ONG0600720	Chr6	28447836	28447941	mtDNA	NC_011033.1	232467..232572	-	99.06
AzucenaRS1	ONG0600720	Chr6	28447943	28448099	ptDNA	NC_001320.1	15847..16003	-	98.09
AzucenaRS1	ONG0600720	Chr6	28448099	28448239	ptDNA	NC_001320.1	54687..54827	-	97.87
AzucenaRS1	ONG0600730	Chr6	28517871	28518119	ptDNA	NC_001320.1	81714..81965	-	88.1
AzucenaRS1	ONG0700010	Chr7	805495	805576	mtDNA	NC_011033.1	120396..120475	-	95.12
AzucenaRS1	ONG0700040	Chr7	1910056	1910218	ptDNA	NC_001320.1	20400..20562	+	96.93
AzucenaRS1	ONG0700050	Chr7	2119261	2119363	mtDNA	NC_011033.1	173271..173372	-	99.03
AzucenaRS1	ONG0700050	Chr7	2119363	2119451	mtDNA	NC_011033.1	350228..350316	-	98.88
AzucenaRS1	ONG0700050	Chr7	2119453	2119515	mtDNA	NC_011033.1	303623..303685	-	100
AzucenaRS1	ONG0700060	Chr7	3075893	3075966	ptDNA	NC_001320.1	12865..12938	+	100
AzucenaRS1	ONG0700070	Chr7	3960947	3961195	ptDNA	NC_001320.1	112734..112983	+	98
AzucenaRS1	ONG0700080	Chr7	4428772	4428878	ptDNA	NC_001320.1	82016..82124	+	94.5
AzucenaRS1	ONG0700080	Chr7	4428877	4429038	ptDNA	NC_001320.1	77251..77415	-	91.52
AzucenaRS1	ONG0700090	Chr7	4532901	4533004	ptDNA	NC_001320.1	64417..64521	+	99.05
AzucenaRS1	ONG0700100	Chr7	4757509	4757652	ptDNA	NC_001320.1	85541..85684	-	93.75
AzucenaRS1	ONG0700110	Chr7	5004433	5004577	mtDNA	NC_011033.1	78923..79067	+	97.93
AzucenaRS1	ONG0700120	Chr7	5392093	5392224	mtDNA	NC_011033.1	69644..69775	-	97.73
AzucenaRS1	ONG0700130	Chr7	5800520	5800762	mtDNA	NC_011033.1	227901..228155	-	93.73
AzucenaRS1	ONG0700140	Chr7	6577572	6577668	mtDNA	NC_011033.1	210846..210942	-	95.88
AzucenaRS1	ONG0700140	Chr7	6577714	6577798	mtDNA	NC_011033.1	85413..85497	+	95.29
AzucenaRS1	ONG0700150	Chr7	6679969	6680051	mtDNA	NC_011033.1	120600..120682	+	98.8
AzucenaRS1	ONG0700150	Chr7	6679969	6680051	ptDNA	NC_001320.1	51101..51185	+	96.47
AzucenaRS1	ONG0700160	Chr7	6767075	6767409	mtDNA	NC_011033.1	273309..273647	+	88.92
AzucenaRS1	ONG0700170	Chr7	6773729	6773900	ptDNA	NC_001320.1	113589..113760	+	98.84
AzucenaRS1	ONG0700180	Chr7	7486161	7487036	ptDNA	NC_001320.1	65509..66460	+	87.87
AzucenaRS1	ONG0700190	Chr7	7954376	7954641	mtDNA	NC_011033.1	300199..300469	+	91.51
AzucenaRS1	ONG0700200	Chr7	8316498	8316762	ptDNA	NC_001320.1	130125..130410	+	81.82
AzucenaRS1	ONG0700210	Chr7	8353560	8353894	mtDNA	NC_011033.1	278521..278855	-	97.61
AzucenaRS1	ONG0700220	Chr7	8916940	8917058	ptDNA	NC_001320.1	60827..60945	-	99.16
AzucenaRS1	ONG0700230	Chr7	9001477	9001529	mtDNA	NC_011033.1	401640..401692	+	100
AzucenaRS1	ONG0700240	Chr7	9070360	9070452	ptDNA	NC_001320.1	3825..3918	-	97.87
AzucenaRS1	ONG0700240	Chr7	9070449	9070623	ptDNA	NC_001320.1	18111..18284	-	96.57
AzucenaRS1	ONG0700250	Chr7	9777317	9777465	mtDNA	NC_011033.1	225185..225333	-	100
AzucenaRS1	ONG0700250	Chr7	9777466	9777548	mtDNA	NC_011033.1	85325..85407	-	97.59
AzucenaRS1	ONG0700260	Chr7	11536913	11537044	mtDNA	NC_011033.1	271264..271395	-	95.45
AzucenaRS1	ONG0700270	Chr7	12273001	12273349	mtDNA	NC_011033.1	296535..296903	-	85.22
AzucenaRS1	ONG0700270	Chr7	12275570	12275651	mtDNA	NC_011033.1	296452..296533	-	96.34
AzucenaRS1	ONG0700280	Chr7	12509936	12514019	ptDNA	NC_001320.1	105819..109910	-	99.32
AzucenaRS1	ONG0700290	Chr7	12609792	12609911	mtDNA	NC_011033.1	113741..113858	-	93.33
AzucenaRS1	ONG0700300	Chr7	13352330	13352400	mtDNA	NC_011033.1	241267..241337	+	97.18
AzucenaRS1	ONG0700300	Chr7	13352489	13352737	mtDNA	NC_011033.1	283892..284140	+	95.18
AzucenaRS1	ONG0700320	Chr7	14009194	14009520	ptDNA	NC_001320.1	26315..26640	+	95.72
AzucenaRS1	ONG0700330	Chr7	14234452	14234567	mtDNA	NC_011033.1	61186..61301	+	100
AzucenaRS1	ONG0700340	Chr7	14426334	14426520	ptDNA	NC_001320.1	4146..4332	-	84.02
AzucenaRS1	ONG0700350	Chr7	14797533	14797724	mtDNA	NC_011033.1	330836..331027	-	97.92
AzucenaRS1	ONG0700370	Chr7	15299528	15299586	ptDNA	NC_001320.1	28178..28236	+	100
AzucenaRS1	ONG0700370	Chr7	15299641	15299762	ptDNA	NC_001320.1	9014..9135	+	96.72
AzucenaRS1	ONG0700380	Chr7	16190894	16191042	mtDNA	NC_011033.1	131734..131882	-	97.32
AzucenaRS1	ONG0700380	Chr7	16191043	16191309	mtDNA	NC_011033.1	192799..193065	-	98.5
AzucenaRS1	ONG0700390	Chr7	16413603	16413693	mtDNA	NC_011033.1	84096..84186	+	98.9
AzucenaRS1	ONG0700410	Chr7	17210023	17210195	ptDNA	NC_001320.1	103639..103812	-	94.86
AzucenaRS1	ONG0700420	Chr7	17277073	17277303	mtDNA	NC_011033.1	252698..252928	-	97.4
AzucenaRS1	ONG0700430	Chr7	17377538	17377819	ptDNA	NC_001320.1	30468..30754	+	91.64
AzucenaRS1	ONG0700430	Chr7	17378182	17378366	mtDNA	NC_011033.1	75658..75840	-	97.84
AzucenaRS1	ONG0700430	Chr7	17378368	17378450	mtDNA	NC_011033.1	229527..229609	-	97.59
AzucenaRS1	ONG0700440	Chr7	14009194	14009520	ptDNA	NC_001320.1	26315..26640	+	95.72
AzucenaRS1	ONG0700440	Chr7	17518194	17518519	ptDNA	NC_001320.1	26315..26640	-	95.71
AzucenaRS1	ONG0700450	Chr7	18555503	18555714	ptDNA	NC_001320.1	125874..126080	+	89.15
AzucenaRS1	ONG0700460	Chr7	18852472	18852619	ptDNA	NC_001320.1	3562..3709	-	95.95
AzucenaRS1	ONG0700460	Chr7	18852611	18852827	ptDNA	NC_001320.1	62264..62480	+	95.39
AzucenaRS1	ONG0700460	Chr7	18852827	18853027	ptDNA	NC_001320.1	96153..96353	+	97.01
AzucenaRS1	ONG0700470	Chr7	18916436	18916552	ptDNA	NC_001320.1	116136..116249	-	93.16
AzucenaRS1	ONG0700480	Chr7	19231206	19231400	ptDNA	NC_001320.1	13601..13801	-	86.7
AzucenaRS1	ONG0700490	Chr7	20295666	20295787	mtDNA	NC_011033.1	406768..406889	+	98.36
AzucenaRS1	ONG0700490	Chr7	20295788	20295989	mtDNA	NC_011033.1	366582..366783	+	97.03
AzucenaRS1	ONG0700500	Chr7	21316095	21316183	ptDNA	NC_001320.1	12164..12252	-	100
AzucenaRS1	ONG0700510	Chr7	21398344	21398568	ptDNA	NC_001320.1	20290..20514	-	99.11
AzucenaRS1	ONG0700520	Chr7	21433445	21433808	ptDNA	NC_001320.1	91352..91707	+	94.78
AzucenaRS1	ONG0700530	Chr7	21694352	21694543	mtDNA	NC_011033.1	282834..283021	-	93.75
AzucenaRS1	ONG0700540	Chr7	21723902	21724013	mtDNA	NC_011033.1	363305..363416	+	97.32
AzucenaRS1	ONG0700540	Chr7	21724013	21724107	mtDNA	NC_011033.1	276477..276571	+	100
AzucenaRS1	ONG0700540	Chr7	21724114	21724327	mtDNA	NC_011033.1	205614..205825	-	95.79
AzucenaRS1	ONG0700550	Chr7	21946234	21948190	ptDNA	NC_001320.1	61825..63759	-	97.35
AzucenaRS1	ONG0700580	Chr7	22837914	22838136	mtDNA	NC_011033.1	110693..110915	+	99.1
AzucenaRS1	ONG0700590	Chr7	22985956	22986022	mtDNA	NC_011033.1	327520..327586	-	95.52
AzucenaRS1	ONG0700610	Chr7	23347295	23347384	mtDNA	NC_011033.1	137501..137592	+	97.83
AzucenaRS1	ONG0700620	Chr7	23371891	23372003	mtDNA	NC_011033.1	98994..99106	+	100
AzucenaRS1	ONG0700640	Chr7	24446869	24446959	mtDNA	NC_011033.1	406755..406845	+	98.9
AzucenaRS1	ONG0700650	Chr7	24774121	24774466	mtDNA	NC_011033.1	211021..211360	-	93.93
AzucenaRS1	ONG0700660	Chr7	25882905	25883209	mtDNA	NC_011033.1	321366..321676	-	84.71
AzucenaRS1	ONG0700670	Chr7	27434203	27438832	ptDNA	NC_001320.1	76165..80807	+	99.16
AzucenaRS1	ONG0700670	Chr7	27438619	27438832	ptDNA	NC_001320.1	134311..134525	-	98.6
AzucenaRS1	ONG0700680	Chr7	28455923	28456024	mtDNA	NC_011033.1	440718..440819	+	99.02
AzucenaRS1	ONG0800010	Chr8	12183	12823	mtDNA	NC_011033.1	224270..224906	+	97.5
AzucenaRS1	ONG0800010	Chr8	15230	15351	mtDNA	NC_011033.1	405096..405217	-	98.36
AzucenaRS1	ONG0800020	Chr8	76384	76788	ptDNA	NC_001320.1	74234..74633	+	95.1
AzucenaRS1	ONG0800030	Chr8	472996	473238	mtDNA	NC_011033.1	263363..263604	-	93.47
AzucenaRS1	ONG0800040	Chr8	598560	598757	mtDNA	NC_011033.1	108431..108647	-	85.25
AzucenaRS1	ONG0800050	Chr8	625545	625766	mtDNA	NC_011033.1	108431..108645	-	90.13
AzucenaRS1	ONG0800060	Chr8	909553	909712	ptDNA	NC_001320.1	120244..120406	-	94.48
AzucenaRS1	ONG0800070	Chr8	974790	974842	mtDNA	NC_011033.1	119052..119105	-	98.15
AzucenaRS1	ONG0800080	Chr8	2007313	2007898	mtDNA	NC_011033.1	91793..92361	-	92.49
AzucenaRS1	ONG0800090	Chr8	2295553	2295649	mtDNA	NC_011033.1	359112..359208	-	94.85
AzucenaRS1	ONG0800100	Chr8	2442310	2442405	mtDNA	NC_011033.1	366578..366673	+	93.75
AzucenaRS1	ONG0800100	Chr8	2442423	2442473	mtDNA	NC_011033.1	286524..286574	-	100
AzucenaRS1	ONG0800120	Chr8	2762398	2762493	mtDNA	NC_011033.1	2048..2143	+	94.79
AzucenaRS1	ONG0800120	Chr8	2762495	2762561	mtDNA	NC_011033.1	315212..315278	-	100
AzucenaRS1	ONG0800130	Chr8	3043476	3043713	ptDNA	NC_001320.1	28867..29120	+	86.27
AzucenaRS1	ONG0800140	Chr8	3745332	3745578	ptDNA	NC_001320.1	96705..96956	-	87.35
AzucenaRS1	ONG0800140	Chr8	3745986	3746257	ptDNA	NC_001320.1	96081..96339	-	86.86
AzucenaRS1	ONG0800150	Chr8	3952438	3953027	ptDNA	NC_001320.1	70346..70936	-	98.14
AzucenaRS1	ONG0800160	Chr8	4120998	4121298	ptDNA	NC_001320.1	122878..123174	-	87.38
AzucenaRS1	ONG0800170	Chr8	4182422	4182578	mtDNA	NC_011033.1	371523..371678	+	94.27
AzucenaRS1	ONG0800180	Chr8	5019959	5020051	mtDNA	NC_011033.1	398278..398375	-	93.88
AzucenaRS1	ONG0800190	Chr8	5944333	5944610	mtDNA	NC_011033.1	396341..396618	+	100
AzucenaRS1	ONG0800190	Chr8	5944610	5944754	mtDNA	NC_011033.1	308853..308997	-	99.31
AzucenaRS1	ONG0800200	Chr8	5971159	5971610	mtDNA	NC_011033.1	290824..291268	+	94.47
AzucenaRS1	ONG0800210	Chr8	6346668	6346848	ptDNA	NC_001320.1	61452..61634	+	96.17
AzucenaRS1	ONG0800210	Chr8	6346852	6346964	ptDNA	NC_001320.1	108824..108936	-	96.46
AzucenaRS1	ONG0800220	Chr8	7620763	7620926	mtDNA	NC_011033.1	91166..91329	+	98.17
AzucenaRS1	ONG0800230	Chr8	7631976	7632124	ptDNA	NC_001320.1	130485..130636	+	96.05
AzucenaRS1	ONG0800230	Chr8	7631976	7632124	ptDNA	NC_001320.1	84482..84633	-	96.05
AzucenaRS1	ONG0800240	Chr8	7691383	7691460	mtDNA	NC_011033.1	237316..237393	+	100
AzucenaRS1	ONG0800270	Chr8	9147596	9147686	mtDNA	NC_011033.1	348411..348501	+	98.9
AzucenaRS1	ONG0800280	Chr8	9480978	9481277	ptDNA	NC_001320.1	20060..20359	+	93.33
AzucenaRS1	ONG0800300	Chr8	10083264	10083334	ptDNA	NC_001320.1	32663..32734	+	97.22
AzucenaRS1	ONG0800310	Chr8	10618884	10619065	ptDNA	NC_001320.1	77336..77516	-	96.15
AzucenaRS1	ONG0800330	Chr8	10989578	10990128	ptDNA	NC_001320.1	68750..69301	-	96.01
AzucenaRS1	ONG0800340	Chr8	11365191	11365566	mtDNA	NC_011033.1	271008..271389	-	90.08
AzucenaRS1	ONG0800350	Chr8	11530091	11530260	mtDNA	NC_011033.1	110579..110748	+	98.82
AzucenaRS1	ONG0800360	Chr8	11634043	11634257	ptDNA	NC_001320.1	107801..108015	-	98.14
AzucenaRS1	ONG0800380	Chr8	12653377	12653444	ptDNA	NC_001320.1	106440..106507	+	97.06
AzucenaRS1	ONG0800390	Chr8	12573386	12573586	mtDNA	NC_011033.1	291795..291995	-	98.51
AzucenaRS1	ONG0800400	Chr8	12374539	12374802	ptDNA	NC_001320.1	111035..111297	+	98.48
AzucenaRS1	ONG0800400	Chr8	12374803	12375093	ptDNA	NC_001320.1	111200..111490	+	98.97
AzucenaRS1	ONG0800410	Chr8	12159332	12159614	mtDNA	NC_011033.1	221387..221669	-	98.94
AzucenaRS1	ONG0800410	Chr8	12159614	12160059	mtDNA	NC_011033.1	239863..240308	+	99.33
AzucenaRS1	ONG0800430	Chr8	12964219	12964580	mtDNA	NC_011033.1	59941..60302	-	98.07
AzucenaRS1	ONG0800440	Chr8	14467848	14467913	mtDNA	NC_011033.1	207846..207911	+	96.97
AzucenaRS1	ONG0800450	Chr8	14517473	14517680	ptDNA	NC_001320.1	50176..50383	-	94.71
AzucenaRS1	ONG0800460	Chr8	14757209	14757425	ptDNA	NC_001320.1	23609..23822	-	96.35
AzucenaRS1	ONG0800470	Chr8	14906672	14906762	mtDNA	NC_011033.1	262075..262167	+	97.85
AzucenaRS1	ONG0800480	Chr8	14915695	14915882	mtDNA	NC_011033.1	241050..241237	+	89.89
AzucenaRS1	ONG0800490	Chr8	16836788	16837452	ptDNA	NC_001320.1	51394..52054	-	92.88
AzucenaRS1	ONG0800500	Chr8	17777453	17777716	mtDNA	NC_011033.1	270133..270391	-	87.17
AzucenaRS1	ONG0800510	Chr8	17810990	17811153	ptDNA	NC_001320.1	77251..77415	+	93.33
AzucenaRS1	ONG0800510	Chr8	17811152	17811292	ptDNA	NC_001320.1	81979..82124	-	90.41
AzucenaRS1	ONG0800520	Chr8	18117648	18117937	mtDNA	NC_011033.1	245685..245975	+	96.22
AzucenaRS1	ONG0800520	Chr8	18117975	18118131	mtDNA	NC_011033.1	245819..245975	+	96.82
AzucenaRS1	ONG0800530	Chr8	18374547	18375017	mtDNA	NC_011033.1	337912..338379	+	91.72
AzucenaRS1	ONG0800540	Chr8	19649287	19649435	ptDNA	NC_001320.1	103680..103835	-	92.99
AzucenaRS1	ONG0800550	Chr8	19709683	19709882	mtDNA	NC_011033.1	407569..407768	-	99.5
AzucenaRS1	ONG0800550	Chr8	19709884	19710048	mtDNA	NC_011033.1	283010..283174	+	97.58
AzucenaRS1	ONG0800560	Chr8	19813552	19813639	ptDNA	NC_001320.1	38696..38783	-	92.05
AzucenaRS1	ONG0800560	Chr8	19815013	19815300	mtDNA	NC_011033.1	298326..298613	+	96.18
AzucenaRS1	ONG0800570	Chr8	21058298	21058371	mtDNA	NC_011033.1	385939..386014	+	93.42
AzucenaRS1	ONG0800570	Chr8	21058373	21058490	mtDNA	NC_011033.1	369853..369970	+	98.31
AzucenaRS1	ONG0800580	Chr8	21588451	21588517	ptDNA	NC_001320.1	74968..75034	-	100
AzucenaRS1	ONG0800590	Chr8	21708292	21708541	ptDNA	NC_001320.1	7454..7703	+	99.2
AzucenaRS1	ONG0800600	Chr8	22017222	22017325	ptDNA	NC_001320.1	6517..6615	-	94.23
AzucenaRS1	ONG0800610	Chr8	22247778	22247882	ptDNA	NC_001320.1	134321..134419	+	89.52
AzucenaRS1	ONG0800620	Chr8	22863699	22863800	ptDNA	NC_001320.1	40729..40830	+	94.12
AzucenaRS1	ONG0800630	Chr8	24332884	24333442	ptDNA	NC_001320.1	23476..24034	-	99.82
AzucenaRS1	ONG0800640	Chr8	24996808	24996943	mtDNA	NC_011033.1	353515..353650	+	93.38
AzucenaRS1	ONG0800650	Chr8	26096049	26096367	mtDNA	NC_011033.1	395284..395601	+	96.87
AzucenaRS1	ONG0800660	Chr8	26161754	26161910	mtDNA	NC_011033.1	185600..185758	-	96.23
AzucenaRS1	ONG0800670	Chr8	26173548	26173712	ptDNA	NC_001320.1	52761..52926	-	93.37
AzucenaRS1	ONG0800670	Chr8	26173707	26173871	mtDNA	NC_011033.1	286936..287099	+	93.98
AzucenaRS1	ONG0800670	Chr8	26173871	26173929	ptDNA	NC_001320.1	59646..59704	+	100
AzucenaRS1	ONG0800670	Chr8	26173927	26174129	ptDNA	NC_001320.1	37236..37438	+	97.04
AzucenaRS1	ONG0800670	Chr8	26174167	26174265	mtDNA	NC_011033.1	85392..85490	-	94.95
AzucenaRS1	ONG0800670	Chr8	26174266	26174376	mtDNA	NC_011033.1	270896..271006	-	94.59
AzucenaRS1	ONG0800670	Chr8	26174379	26174558	mtDNA	NC_011033.1	327014..327193	+	93.33
AzucenaRS1	ONG0900010	Chr9	582775	583078	mtDNA	NC_011033.1	295961..296282	+	88.51
AzucenaRS1	ONG0900020	Chr9	651065	651213	mtDNA	NC_011033.1	322269..322418	+	91.33
AzucenaRS1	ONG0900020	Chr9	651910	652108	ptDNA	NC_001320.1	84356..84556	-	90.55
AzucenaRS1	ONG0900020	Chr9	651910	652108	ptDNA	NC_001320.1	130562..130762	+	90.55
AzucenaRS1	ONG0900020	Chr9	652127	652222	mtDNA	NC_011033.1	75913..76008	-	94.79
AzucenaRS1	ONG0900030	Chr9	959665	959989	ptDNA	NC_001320.1	88209..88533	-	93.54
AzucenaRS1	ONG0900030	Chr9	959989	960144	ptDNA	NC_001320.1	87811..87966	+	96.79
AzucenaRS1	ONG0900040	Chr9	1387559	1388009	mtDNA	NC_011033.1	40369..40816	-	97.12
AzucenaRS1	ONG0900070	Chr9	2783492	2784590	ptDNA	NC_001320.1	68703..69801	+	99.55
AzucenaRS1	ONG0900070	Chr9	2796394	2796914	ptDNA	NC_001320.1	70685..71205	+	99.23
AzucenaRS1	ONG0900080	Chr9	4345607	4345696	ptDNA	NC_001320.1	38801..38890	+	93.33
AzucenaRS1	ONG0900090	Chr9	4378687	4378912	ptDNA	NC_001320.1	5673..5916	+	88.11
AzucenaRS1	ONG0900100	Chr9	4630946	4632359	ptDNA	NC_001320.1	74470..75849	+	95.62
AzucenaRS1	ONG0900100	Chr9	4635798	4635850	ptDNA	NC_001320.1	8040..8091	-	98.11
AzucenaRS1	ONG0900110	Chr9	5042546	5042602	ptDNA	NC_001320.1	56652..56708	+	98.25
AzucenaRS1	ONG0900120	Chr9	5061300	5063171	ptDNA	NC_001320.1	33259..35155	+	94.03
AzucenaRS1	ONG0900130	Chr9	5589309	5589526	ptDNA	NC_001320.1	19380..19597	+	95.87
AzucenaRS1	ONG0900130	Chr9	5589767	5589848	ptDNA	NC_001320.1	19599..19680	+	97.56
AzucenaRS1	ONG0900140	Chr9	6141362	6141526	ptDNA	NC_001320.1	6148..6311	+	91.52
AzucenaRS1	ONG0900150	Chr9	6502080	6502238	mtDNA	NC_011033.1	249737..249895	+	95.6
AzucenaRS1	ONG0900160	Chr9	6573404	6573758	ptDNA	NC_001320.1	104912..105253	-	82.58
AzucenaRS1	ONG0900170	Chr9	7107883	7108254	ptDNA	NC_001320.1	84593..84964	+	95.97
AzucenaRS1	ONG0900180	Chr9	7367048	7367355	ptDNA	NC_001320.1	19380..19680	+	91.56
AzucenaRS1	ONG0900190	Chr9	7753697	7754400	mtDNA	NC_011033.1	234236..234925	-	92.33
AzucenaRS1	ONG0900190	Chr9	7749456	7749980	mtDNA	NC_011033.1	234920..235445	-	91.3
AzucenaRS1	ONG0900200	Chr9	7966783	7967086	ptDNA	NC_001320.1	19380..19680	+	93.42
AzucenaRS1	ONG0900200	Chr9	11734095	11734381	ptDNA	NC_001320.1	19380..19665	-	91.99
AzucenaRS1	ONG0900210	Chr9	8368071	8368280	ptDNA	NC_001320.1	28273..28478	+	92.89
AzucenaRS1	ONG0900220	Chr9	8400261	8400348	ptDNA	NC_001320.1	60676..60763	+	98.86
AzucenaRS1	ONG0900230	Chr9	9244265	9244347	mtDNA	NC_011033.1	128300..128380	-	93.98
AzucenaRS1	ONG0900230	Chr9	9244350	9244490	mtDNA	NC_011033.1	178787..178927	+	92.2
AzucenaRS1	ONG0900240	Chr9	9299215	9299332	mtDNA	NC_011033.1	178787..178904	+	96.61
AzucenaRS1	ONG0900270	Chr9	10956149	10956355	ptDNA	NC_001320.1	127570..127777	-	97.6
AzucenaRS1	ONG0900280	Chr9	11061335	11061560	ptDNA	NC_001320.1	57469..57695	+	93.42
AzucenaRS1	ONG0900290	Chr9	11168979	11169598	mtDNA	NC_011033.1	310298..310913	-	93.12
AzucenaRS1	ONG0900310	Chr9	12096890	12102247	ptDNA	NC_001320.1	76564..81950	-	98.18
AzucenaRS1	ONG0900320	Chr9	12501925	12502225	ptDNA	NC_001320.1	19380..19680	+	94.35
AzucenaRS1	ONG0900320	Chr9	12856684	12856984	ptDNA	NC_001320.1	19380..19680	+	94.35
AzucenaRS1	ONG0900320	Chr9	13114618	13114918	ptDNA	NC_001320.1	19380..19680	+	94.35
AzucenaRS1	ONG0900330	Chr9	12787420	12787590	mtDNA	NC_011033.1	110991..111165	-	94.29
AzucenaRS1	ONG0900330	Chr9	12787597	12787785	mtDNA	NC_011033.1	162520..162708	+	94.71
AzucenaRS1	ONG0900340	Chr9	12888423	12888582	ptDNA	NC_001320.1	98405..98564	-	91.93
AzucenaRS1	ONG0900350	Chr9	14078491	14078845	mtDNA	NC_011033.1	253540..253894	-	94.68
AzucenaRS1	ONG0900350	Chr9	14079115	14079184	mtDNA	NC_011033.1	219219..219288	+	97.14
AzucenaRS1	ONG0900380	Chr9	15980224	15980311	ptDNA	NC_001320.1	39590..39677	-	96.59
AzucenaRS1	ONG0900390	Chr9	16447809	16447967	mtDNA	NC_011033.1	151480..151638	+	98.11
AzucenaRS1	ONG0900390	Chr9	16447971	16448282	mtDNA	NC_011033.1	122470..122784	-	96.83
AzucenaRS1	ONG0900390	Chr9	16448282	16448576	mtDNA	NC_011033.1	56595..56889	+	100
AzucenaRS1	ONG0900390	Chr9	16448577	16448746	ptDNA	NC_001320.1	7858..8027	+	98.24
AzucenaRS1	ONG0900390	Chr9	16448747	16448997	mtDNA	NC_011033.1	149781..150018	-	89.24
AzucenaRS1	ONG0900390	Chr9	16449067	16449525	mtDNA	NC_011033.1	346424..346882	+	98.91
AzucenaRS1	ONG0900390	Chr9	16449658	16449806	mtDNA	NC_011033.1	484184..484332	+	97.99
AzucenaRS1	ONG0900390	Chr9	16449808	16450114	mtDNA	NC_011033.1	391365..391672	-	98.05
AzucenaRS1	ONG0900390	Chr9	16450114	16450274	mtDNA	NC_011033.1	346313..346473	-	99.38
AzucenaRS1	ONG0900390	Chr9	16450275	16450404	mtDNA	NC_011033.1	235534..235663	-	100
AzucenaRS1	ONG0900390	Chr9	16449526	16449658	mtDNA	NC_011033.1	257156..257288	-	99.25
AzucenaRS1	ONG0900400	Chr9	16643430	16644405	mtDNA	NC_011033.1	70607..71562	+	92.21
AzucenaRS1	ONG0900420	Chr9	17308136	17308521	ptDNA	NC_001320.1	40243..40628	-	99.22
AzucenaRS1	ONG0900430	Chr9	18489625	18489831	ptDNA	NC_001320.1	46624..46834	+	91
AzucenaRS1	ONG0900440	Chr9	18607977	18608051	ptDNA	NC_001320.1	43192..43266	-	97.33
AzucenaRS1	ONG0900450	Chr9	18661271	18661411	mtDNA	NC_011033.1	303418..303558	+	95.04
AzucenaRS1	ONG0900460	Chr9	18737082	18737204	mtDNA	NC_011033.1	265873..265996	-	95.16
AzucenaRS1	ONG0900460	Chr9	18737206	18737417	mtDNA	NC_011033.1	307001..307213	+	93.9
AzucenaRS1	ONG0900470	Chr9	18815186	18815583	ptDNA	NC_001320.1	107930..108326	-	95.23
AzucenaRS1	ONG0900480	Chr9	18846657	18846713	ptDNA	NC_001320.1	22896..22952	+	98.25
AzucenaRS1	ONG0900480	Chr9	18848817	18849029	mtDNA	NC_011033.1	70583..70795	+	99.53
AzucenaRS1	ONG0900480	Chr9	18849030	18849228	mtDNA	NC_011033.1	266013..266212	-	97.5
AzucenaRS1	ONG0900480	Chr9	18849229	18849503	mtDNA	NC_011033.1	308836..309111	-	97.1
AzucenaRS1	ONG0900490	Chr9	20320266	20320366	ptDNA	NC_001320.1	76850..76950	-	100
AzucenaRS1	ONG0900500	Chr9	20424026	20424286	mtDNA	NC_011033.1	394088..394348	-	94.64
AzucenaRS1	ONG0900500	Chr9	20424288	20424580	mtDNA	NC_011033.1	46758..47050	-	96.59
AzucenaRS1	ONG0900500	Chr9	20424580	20424812	ptDNA	NC_001320.1	74768..75000	-	92.31
AzucenaRS1	ONG0900500	Chr9	20424939	20425161	mtDNA	NC_011033.1	297335..297557	+	94.62
AzucenaRS1	ONG0900510	Chr9	21262977	21263140	ptDNA	NC_001320.1	77251..77415	+	93.94
AzucenaRS1	ONG0900520	Chr9	22036177	22036777	ptDNA	NC_001320.1	61558..62158	+	100
AzucenaRS1	ONG0900530	Chr9	22883383	22883779	mtDNA	NC_011033.1	286235..286632	+	99.25
AzucenaRS1	ONG1000010	Chr10	2137946	2138001	mtDNA	NC_011033.1	486661..486716	-	100
AzucenaRS1	ONG1000010	Chr10	2138000	2138064	mtDNA	NC_011033.1	401681..401745	+	100
AzucenaRS1	ONG1000020	Chr10	2466892	2467008	mtDNA	NC_011033.1	221890..222006	+	96.58
AzucenaRS1	ONG1000020	Chr10	2467238	2467315	ptDNA	NC_001320.1	69492..69566	-	94.87
AzucenaRS1	ONG1000030	Chr10	3332763	3332919	mtDNA	NC_011033.1	230973..231126	+	87.26
AzucenaRS1	ONG1000040	Chr10	5099254	5099336	mtDNA	NC_011033.1	340388..340471	-	98.81
AzucenaRS1	ONG1000040	Chr10	5099341	5099421	mtDNA	NC_011033.1	475447..475527	-	92.59
AzucenaRS1	ONG1000040	Chr10	5099418	5099527	mtDNA	NC_011033.1	452492..452601	-	97.27
AzucenaRS1	ONG1000040	Chr10	5099678	5100081	ptDNA	NC_001320.1	125718..126122	+	94.09
AzucenaRS1	ONG1000040	Chr10	5100082	5100278	mtDNA	NC_011033.1	297010..297203	-	94.95
AzucenaRS1	ONG1000050	Chr10	5843595	5843815	ptDNA	NC_001320.1	4113..4346	-	82.57
AzucenaRS1	ONG1000060	Chr10	6223740	6223841	mtDNA	NC_011033.1	243158..243259	+	96.08
AzucenaRS1	ONG1000070	Chr10	6724232	6725108	ptDNA	NC_001320.1	1832..2714	-	96.95
AzucenaRS1	ONG1000080	Chr10	6644882	6645069	ptDNA	NC_001320.1	100187..100372	-	88.3
AzucenaRS1	ONG1000080	Chr10	6645169	6645264	ptDNA	NC_001320.1	100135..100230	-	92.71
AzucenaRS1	ONG1000090	Chr10	8160959	8161129	ptDNA	NC_001320.1	127928..128098	-	97.66
AzucenaRS1	ONG1000110	Chr10	8929815	8929901	mtDNA	NC_011033.1	100716..100802	-	100
AzucenaRS1	ONG1000110	Chr10	8929901	8929996	mtDNA	NC_011033.1	115975..116070	-	100
AzucenaRS1	ONG1000110	Chr10	8929997	8930131	mtDNA	NC_011033.1	136927..137061	+	97.04
AzucenaRS1	ONG1000110	Chr10	8930131	8930211	ptDNA	NC_001320.1	45530..45610	+	100
AzucenaRS1	ONG1000110	Chr10	8930365	8930473	mtDNA	NC_011033.1	356535..356643	-	96.33
AzucenaRS1	ONG1000110	Chr10	8930474	8930611	mtDNA	NC_011033.1	207284..207421	-	97.1
AzucenaRS1	ONG1000110	Chr10	8930611	8930709	mtDNA	NC_011033.1	317620..317718	+	97.98
AzucenaRS1	ONG1000110	Chr10	8930709	8930849	ptDNA	NC_001320.1	46570..46710	-	97.87
AzucenaRS1	ONG1000110	Chr10	8930851	8931125	ptDNA	NC_001320.1	110012..110286	+	99.27
AzucenaRS1	ONG1000110	Chr10	8931128	8931205	mtDNA	NC_011033.1	245440..245517	+	97.44
AzucenaRS1	ONG1000110	Chr10	8931199	8931357	mtDNA	NC_011033.1	177777..177935	+	94.97
AzucenaRS1	ONG1000110	Chr10	8931356	8931448	ptDNA	NC_001320.1	10098..10190	+	97.85
AzucenaRS1	ONG1000110	Chr10	8931447	8931528	mtDNA	NC_011033.1	89980..90061	-	96.34
AzucenaRS1	ONG1000110	Chr10	8931529	8931641	mtDNA	NC_011033.1	357017..357130	-	99.12
AzucenaRS1	ONG1000110	Chr10	8931637	8931764	mtDNA	NC_011033.1	8876..9002	+	97.66
AzucenaRS1	ONG1000110	Chr10	8931851	8931959	mtDNA	NC_011033.1	192289..192397	-	98.17
AzucenaRS1	ONG1000110	Chr10	8931959	8932075	mtDNA	NC_011033.1	66972..67088	-	93.16
AzucenaRS1	ONG1000110	Chr10	8932075	8932247	mtDNA	NC_011033.1	443246..443418	+	98.27
AzucenaRS1	ONG1000110	Chr10	8932380	8932613	mtDNA	NC_011033.1	171974..172207	-	95.73
AzucenaRS1	ONG1000110	Chr10	8932613	8932698	mtDNA	NC_011033.1	421290..421375	-	96.51
AzucenaRS1	ONG1000110	Chr10	8932698	8932805	mtDNA	NC_011033.1	384704..384811	-	99.07
AzucenaRS1	ONG1000110	Chr10	8932804	8932926	mtDNA	NC_011033.1	342328..342450	+	98.37
AzucenaRS1	ONG1000120	Chr10	9913739	9913794	mtDNA	NC_011033.1	260982..261037	-	100
AzucenaRS1	ONG1000120	Chr10	9913794	9913885	ptDNA	NC_001320.1	81711..81802	-	96.74
AzucenaRS1	ONG1000130	Chr10	10952433	10952608	ptDNA	NC_001320.1	73068..73239	+	92.05
AzucenaRS1	ONG1000140	Chr10	11142746	11143516	mtDNA	NC_011033.1	365345..366098	+	92.89
AzucenaRS1	ONG1000140	Chr10	11143506	11143670	mtDNA	NC_011033.1	366216..366380	-	95.15
AzucenaRS1	ONG1000140	Chr10	11141087	11141467	mtDNA	NC_011033.1	364984..365351	+	93.72
AzucenaRS1	ONG1000150	Chr10	11365550	11365885	ptDNA	NC_001320.1	90026..90370	-	91.35
AzucenaRS1	ONG1000150	Chr10	11365550	11365885	ptDNA	NC_001320.1	124748..125092	+	91.35
AzucenaRS1	ONG1000200	Chr10	12913373	12913443	mtDNA	NC_011033.1	120942..121013	+	93.06
AzucenaRS1	ONG1000210	Chr10	13104899	13105064	ptDNA	NC_001320.1	121869..122034	-	95.18
AzucenaRS1	ONG1000220	Chr10	13200590	13200707	ptDNA	NC_001320.1	28486..28603	-	95.76
AzucenaRS1	ONG1000230	Chr10	14240713	14240995	mtDNA	NC_011033.1	99764..100046	-	99.29
AzucenaRS1	ONG1000240	Chr10	14485842	14485929	ptDNA	NC_001320.1	106139..106223	+	93.18
AzucenaRS1	ONG1000250	Chr10	14805272	14805344	mtDNA	NC_011033.1	60792..60864	+	95.89
AzucenaRS1	ONG1000260	Chr10	15345787	15345911	ptDNA	NC_001320.1	24126..24251	+	96.83
AzucenaRS1	ONG1000260	Chr7	23968176	23968300	mtDNA	NC_011033.1	289382..289507	-	96.83
AzucenaRS1	ONG1000260	Chr10	15593039	15593163	mtDNA	NC_011033.1	289382..289507	-	95.24
AzucenaRS1	ONG1000260	Chr10	16588529	16588653	ptDNA	NC_001320.1	24126..24251	-	95.24
AzucenaRS1	ONG1000270	Chr10	15407169	15407236	ptDNA	NC_001320.1	85605..85672	+	100
AzucenaRS1	ONG1000280	Chr10	15593039	15593163	mtDNA	NC_011033.1	289382..289507	-	95.24
AzucenaRS1	ONG1000290	Chr10	15922714	15922847	mtDNA	NC_011033.1	386453..386586	+	100
AzucenaRS1	ONG1000290	Chr10	15922846	15922949	mtDNA	NC_011033.1	25586..25689	+	100
AzucenaRS1	ONG1000290	Chr10	15922949	15923105	mtDNA	NC_011033.1	298570..298727	-	98.73
AzucenaRS1	ONG1000290	Chr10	15923106	15923206	ptDNA	NC_001320.1	66643..66743	-	98.02
AzucenaRS1	ONG1000290	Chr10	15923352	15923583	mtDNA	NC_011033.1	250723..250954	+	98.71
AzucenaRS1	ONG1000290	Chr10	15923582	15923697	mtDNA	NC_011033.1	190681..190796	-	99.14
AzucenaRS1	ONG1000290	Chr10	15923898	15924104	mtDNA	NC_011033.1	318206..318412	-	100
AzucenaRS1	ONG1000290	Chr10	15924105	15924305	mtDNA	NC_011033.1	236636..236836	+	99
AzucenaRS1	ONG1000290	Chr10	15924307	15924405	ptDNA	NC_001320.1	3347..3445	-	100
AzucenaRS1	ONG1000290	Chr10	15924405	15925024	mtDNA	NC_011033.1	329444..330063	+	99.52
AzucenaRS1	ONG1000290	Chr10	15925068	15925167	mtDNA	NC_011033.1	180234..180333	+	100
AzucenaRS1	ONG1000290	Chr10	15925168	15925270	mtDNA	NC_011033.1	89870..89972	+	97.09
AzucenaRS1	ONG1000300	Chr10	16588529	16588653	ptDNA	NC_001320.1	24126..24251	-	95.24
AzucenaRS1	ONG1000310	Chr10	16597139	16597395	ptDNA	NC_001320.1	76340..76599	-	97.31
AzucenaRS1	ONG1000350	Chr10	18154389	18154439	mtDNA	NC_011033.1	346626..346676	-	100
AzucenaRS1	ONG1000350	Chr10	18154440	18154489	mtDNA	NC_011033.1	343352..343401	+	100
AzucenaRS1	ONG1000350	Chr10	18154694	18154797	mtDNA	NC_011033.1	114732..114835	+	98.08
AzucenaRS1	ONG1000350	Chr10	18154792	18154859	ptDNA	NC_001320.1	70421..70488	+	100
AzucenaRS1	ONG1000360	Chr10	18830079	18830151	ptDNA	NC_001320.1	33263..33335	+	94.59
AzucenaRS1	ONG1000370	Chr10	18871663	18871862	mtDNA	NC_011033.1	339159..339357	+	93.5
AzucenaRS1	ONG1000400	Chr10	20000572	20000773	mtDNA	NC_011033.1	395979..396197	+	84.47
AzucenaRS1	ONG1000410	Chr10	20402270	20402417	mtDNA	NC_011033.1	238458..238595	-	87.84
AzucenaRS1	ONG1000420	Chr10	20741872	20742008	mtDNA	NC_011033.1	123903..124041	-	95.68
AzucenaRS1	ONG1000430	Chr10	21009955	21010225	ptDNA	NC_001320.1	10505..10777	-	93.07
AzucenaRS1	ONG1000440	Chr10	21138440	21138574	mtDNA	NC_011033.1	162369..162503	+	98.52
AzucenaRS1	ONG1000450	Chr10	21495620	21495752	mtDNA	NC_011033.1	341283..341411	-	91.24
AzucenaRS1	ONG1000450	Chr10	21495753	21495945	mtDNA	NC_011033.1	69832..70024	-	100
AzucenaRS1	ONG1000460	Chr10	21835631	21836011	mtDNA	NC_011033.1	325463..325847	-	96.36
AzucenaRS1	ONG1000470	Chr10	21911995	21912270	ptDNA	NC_001320.1	114449..114724	-	91.01
AzucenaRS1	ONG1000490	Chr10	22800496	22800584	mtDNA	NC_011033.1	372029..372117	-	94.38
AzucenaRS1	ONG1000500	Chr10	23065013	23067714	ptDNA	NC_001320.1	132926..134525,1..1129	-	97.4
AzucenaRS1	ONG1000500	Chr10	23066248	23067714	mtDNA	NC_011033.1	125662..127129	-	97.68
AzucenaRS1	ONG1000510	Chr10	23454171	23454402	ptDNA	NC_001320.1	117869..118099	-	98.28
AzucenaRS1	ONG1000520	Chr10	23717670	23717844	ptDNA	NC_001320.1	105647..105822	-	92.61
AzucenaRS1	ONG1000530	Chr10	24174362	24178674	ptDNA	NC_001320.1	6854..11168	-	99.49
AzucenaRS1	ONG1000540	Chr10	24389824	24390101	ptDNA	NC_001320.1	6529..6807	+	96.42
AzucenaRS1	ONG1000550	Chr10	24450990	24451178	mtDNA	NC_011033.1	317357..317545	-	94.21
AzucenaRS1	ONG1000550	Chr10	24451181	24451390	mtDNA	NC_011033.1	203140..203357	+	87.16
AzucenaRS1	ONG1000560	Chr10	24490250	24492355	ptDNA	NC_001320.1	81559..83664	+	99.48
AzucenaRS1	ONG1000560	Chr10	24492355	24493255	ptDNA	NC_001320.1	22410..23309	-	99
AzucenaRS1	ONG1100010	Chr11	56141	56207	ptDNA	NC_001320.1	94043..94110	+	95.59
AzucenaRS1	ONG1100010	Chr11	56300	56464	mtDNA	NC_011033.1	164324..164488	+	96.97
AzucenaRS1	ONG1100010	Chr11	56486	56589	mtDNA	NC_011033.1	405593..405696	-	95.19
AzucenaRS1	ONG1100020	Chr11	654561	654651	mtDNA	NC_011033.1	233038..233128	-	96.7
AzucenaRS1	ONG1100020	Chr11	654652	654718	ptDNA	NC_001320.1	21472..21538	+	98.51
AzucenaRS1	ONG1100030	Chr11	2102037	2102270	ptDNA	NC_001320.1	37311..37544	+	99.15
AzucenaRS1	ONG1100040	Chr11	3113195	3113244	mtDNA	NC_011033.1	225964..226013	+	100
AzucenaRS1	ONG1100050	Chr11	3274574	3274688	mtDNA	NC_011033.1	297741..297855	+	100
AzucenaRS1	ONG1100060	Chr11	3555599	3555707	ptDNA	NC_001320.1	133985..134093	-	97.25
AzucenaRS1	ONG1100070	Chr11	3760943	3761213	mtDNA	NC_011033.1	234684..234929	-	86.35
AzucenaRS1	ONG1100080	Chr11	3817493	3817756	mtDNA	NC_011033.1	222704..222956	-	85.24
AzucenaRS1	ONG1100090	Chr11	3896530	3896742	mtDNA	NC_011033.1	195909..196121	+	97.18
AzucenaRS1	ONG1100100	Chr11	4414823	4415053	ptDNA	NC_001320.1	22265..22495	-	96.54
AzucenaRS1	ONG1100110	Chr11	4526492	4526746	ptDNA	NC_001320.1	59399..59655	-	95.72
AzucenaRS1	ONG1100110	Chr11	4530487	4530664	ptDNA	NC_001320.1	59226..59403	-	91.67
AzucenaRS1	ONG1100120	Chr11	4704597	4704747	ptDNA	NC_001320.1	36376..36526	-	93.38
AzucenaRS1	ONG1100120	Chr11	4705871	4706247	ptDNA	NC_001320.1	36153..36526	-	92.08
AzucenaRS1	ONG1100130	Chr11	4843890	4844029	ptDNA	NC_001320.1	66892..67037	-	92.47
AzucenaRS1	ONG1100140	Chr11	4955742	4955849	ptDNA	NC_001320.1	130144..130251	-	99.07
AzucenaRS1	ONG1100140	Chr11	4955852	4955999	mtDNA	NC_011033.1	289640..289786	-	97.97
AzucenaRS1	ONG1100150	Chr11	5259429	5259518	mtDNA	NC_011033.1	105710..105799	-	95.56
AzucenaRS1	ONG1100160	Chr11	5849707	5849832	ptDNA	NC_001320.1	41131..41256	-	96.03
AzucenaRS1	ONG1100170	Chr11	5908892	5908981	mtDNA	NC_011033.1	195824..195913	-	100
AzucenaRS1	ONG1100180	Chr11	6213576	6213937	mtDNA	NC_011033.1	129593..129953	-	96.41
AzucenaRS1	ONG1100190	Chr11	6235036	6235101	mtDNA	NC_011033.1	389226..389291	+	100
AzucenaRS1	ONG1100200	Chr11	6684152	6684317	ptDNA	NC_001320.1	129914..130079	-	100
AzucenaRS1	ONG1100210	Chr11	7082538	7082629	mtDNA	NC_011033.1	90379..90470	+	92.39
AzucenaRS1	ONG1100210	Chr11	7082629	7082708	mtDNA	NC_011033.1	387303..387383	+	95.06
AzucenaRS1	ONG1100800	Chr11	7078014	7078075	ptDNA	NC_001320.1	16238..16299	+	100
AzucenaRS1	ONG1100800	Chr11	7078075	7078130	mtDNA	NC_011033.1	242380..242435	-	100
AzucenaRS1	ONG1100220	Chr11	8164310	8164463	mtDNA	NC_011033.1	49681..49834	+	99.35
AzucenaRS1	ONG1100230	Chr11	8300483	8300698	mtDNA	NC_011033.1	235071..235287	+	89.91
AzucenaRS1	ONG1100230	Chr11	8301448	8301606	mtDNA	NC_011033.1	50364..50522	-	88.05
AzucenaRS1	ONG1100240	Chr11	8411394	8411776	ptDNA	NC_001320.1	4279..4662	-	97.66
AzucenaRS1	ONG1100250	Chr11	9233369	9233789	ptDNA	NC_001320.1	77757..78177	+	94.77
AzucenaRS1	ONG1100260	Chr11	9399872	9399989	mtDNA	NC_011033.1	312925..313042	+	100
AzucenaRS1	ONG1100260	Chr11	9400030	9400203	ptDNA	NC_001320.1	7063..7236	-	97.7
AzucenaRS1	ONG1100270	Chr11	9425220	9425576	ptDNA	NC_001320.1	75282..75638	+	97.48
AzucenaRS1	ONG1100280	Chr11	10156928	10157078	mtDNA	NC_011033.1	90605..90755	-	99.34
AzucenaRS1	ONG1100280	Chr11	10157079	10157323	ptDNA	NC_001320.1	48545..48789	+	97.55
AzucenaRS1	ONG1100280	Chr11	10157371	10157468	mtDNA	NC_011033.1	225176..225273	+	100
AzucenaRS1	ONG1100280	Chr11	10157515	10157584	mtDNA	NC_011033.1	235739..235808	-	100
AzucenaRS1	ONG1100280	Chr11	10157586	10157701	ptDNA	NC_001320.1	89583..89703	-	93.39
AzucenaRS1	ONG1100280	Chr11	10161826	10161918	mtDNA	NC_011033.1	239979..240071	-	98.92
AzucenaRS1	ONG1100290	Chr11	10664806	10664892	mtDNA	NC_011033.1	74744..74830	-	96.55
AzucenaRS1	ONG1100300	Chr11	10787442	10787605	mtDNA	NC_011033.1	244863..245026	+	98.78
AzucenaRS1	ONG1100300	Chr11	10787605	10787721	ptDNA	NC_001320.1	51181..51297	+	99.15
AzucenaRS1	ONG1100300	Chr11	10787724	10787815	mtDNA	NC_011033.1	133758..133849	-	100
AzucenaRS1	ONG1100300	Chr11	10787814	10787937	mtDNA	NC_011033.1	242806..242929	-	100
AzucenaRS1	ONG1100300	Chr11	10787938	10788016	mtDNA	NC_011033.1	246147..246225	+	100
AzucenaRS1	ONG1100300	Chr11	10788007	10788171	mtDNA	NC_011033.1	122563..122727	-	98.18
AzucenaRS1	ONG1100300	Chr11	10788171	10788329	mtDNA	NC_011033.1	292407..292565	-	99.37
AzucenaRS1	ONG1100300	Chr11	10788325	10788457	mtDNA	NC_011033.1	36718..36850	+	96.99
AzucenaRS1	ONG1100300	Chr11	10788455	10788604	mtDNA	NC_011033.1	408458..408607	+	98
AzucenaRS1	ONG1100300	Chr11	10788602	10788712	mtDNA	NC_011033.1	249058..249168	+	99.1
AzucenaRS1	ONG1100300	Chr11	10788751	10788829	mtDNA	NC_011033.1	60917..60995	+	98.73
AzucenaRS1	ONG1100310	Chr11	11160243	11160308	mtDNA	NC_011033.1	5369..5434	+	98.48
AzucenaRS1	ONG1100320	Chr11	11821913	11822002	mtDNA	NC_011033.1	366164..366253	+	100
AzucenaRS1	ONG1100320	Chr11	11822037	11822115	mtDNA	NC_011033.1	364891..364969	-	98.73
AzucenaRS1	ONG1100320	Chr11	11822116	11822218	mtDNA	NC_011033.1	249365..249467	-	100
AzucenaRS1	ONG1100320	Chr11	11822260	11822359	mtDNA	NC_011033.1	452804..452903	+	99
AzucenaRS1	ONG1100320	Chr11	11822354	11822399	mtDNA	NC_011033.1	89055..89097	-	93.48
AzucenaRS1	ONG1100320	Chr11	11822399	11822500	mtDNA	NC_011033.1	396856..396957	+	100
AzucenaRS1	ONG1100320	Chr11	11822499	11822551	mtDNA	NC_011033.1	329913..329965	+	100
AzucenaRS1	ONG1100320	Chr11	11822550	11822637	mtDNA	NC_011033.1	113802..113889	-	97.73
AzucenaRS1	ONG1100320	Chr11	11822881	11822944	mtDNA	NC_011033.1	243431..243494	+	98.44
AzucenaRS1	ONG1100320	Chr11	11822943	11823007	mtDNA	NC_011033.1	176036..176100	+	100
AzucenaRS1	ONG1100320	Chr11	11823055	11823137	mtDNA	NC_011033.1	393701..393783	-	100
AzucenaRS1	ONG1100320	Chr11	11823138	11823188	mtDNA	NC_011033.1	395726..395776	+	100
AzucenaRS1	ONG1100320	Chr11	11823280	11823364	mtDNA	NC_011033.1	295457..295541	+	97.65
AzucenaRS1	ONG1100320	Chr11	11823407	11823488	mtDNA	NC_011033.1	483520..483601	+	98.78
AzucenaRS1	ONG1100320	Chr11	11823489	11823569	mtDNA	NC_011033.1	430921..431001	-	98.77
AzucenaRS1	ONG1100320	Chr11	11823569	11823619	mtDNA	NC_011033.1	207910..207960	-	100
AzucenaRS1	ONG1100320	Chr11	11823618	11823708	mtDNA	NC_011033.1	172680..172770	+	97.8
AzucenaRS1	ONG1100320	Chr11	11823706	11823772	mtDNA	NC_011033.1	198987..199053	-	98.51
AzucenaRS1	ONG1100320	Chr11	11823774	11823853	mtDNA	NC_011033.1	322495..322574	-	98.75
AzucenaRS1	ONG1100320	Chr11	11823884	11823936	mtDNA	NC_011033.1	210148..210200	+	100
AzucenaRS1	ONG1100320	Chr11	11823933	11824010	mtDNA	NC_011033.1	162405..162483	+	97.47
AzucenaRS1	ONG1100320	Chr11	11824003	11824056	ptDNA	NC_001320.1	20910..20963	+	100
AzucenaRS1	ONG1100320	Chr11	11824053	11824119	mtDNA	NC_011033.1	374158..374224	+	100
AzucenaRS1	ONG1100320	Chr11	11824119	11824178	mtDNA	NC_011033.1	431315..431374	-	100
AzucenaRS1	ONG1100320	Chr11	11824226	11824317	mtDNA	NC_011033.1	447258..447350	+	97.85
AzucenaRS1	ONG1100320	Chr11	11824311	11824450	mtDNA	NC_011033.1	8406..8545	+	99.29
AzucenaRS1	ONG1100320	Chr11	11824450	11824506	mtDNA	NC_011033.1	317465..317521	+	100
AzucenaRS1	ONG1100320	Chr11	11824507	11824563	mtDNA	NC_011033.1	343899..343955	+	98.25
AzucenaRS1	ONG1100320	Chr11	11824573	11824678	mtDNA	NC_011033.1	375067..375172	-	99.06
AzucenaRS1	ONG1100320	Chr11	11824678	11824759	mtDNA	NC_011033.1	387116..387197	+	98.78
AzucenaRS1	ONG1100320	Chr11	11824809	11824872	mtDNA	NC_011033.1	205186..205249	-	100
AzucenaRS1	ONG1100320	Chr11	11824873	11824976	mtDNA	NC_011033.1	220848..220951	+	98.08
AzucenaRS1	ONG1100320	Chr11	11824975	11825036	mtDNA	NC_011033.1	171041..171102	-	98.39
AzucenaRS1	ONG1100320	Chr11	11825072	11825124	mtDNA	NC_011033.1	202343..202395	+	100
AzucenaRS1	ONG1100320	Chr11	11825123	11825184	mtDNA	NC_011033.1	181635..181696	-	98.39
AzucenaRS1	ONG1100320	Chr11	11825287	11825345	mtDNA	NC_011033.1	122455..122513	+	100
AzucenaRS1	ONG1100320	Chr11	11825341	11825431	mtDNA	NC_011033.1	108825..108915	-	98.9
AzucenaRS1	ONG1100320	Chr11	11825431	11825521	mtDNA	NC_011033.1	284439..284529	+	98.9
AzucenaRS1	ONG1100320	Chr11	11825562	11825620	mtDNA	NC_011033.1	349167..349225	-	100
AzucenaRS1	ONG1100320	Chr11	11825620	11825699	mtDNA	NC_011033.1	167420..167499	+	98.75
AzucenaRS1	ONG1100320	Chr11	11825700	11825756	mtDNA	NC_011033.1	203265..203321	+	100
AzucenaRS1	ONG1100320	Chr11	11825900	11825961	mtDNA	NC_011033.1	184387..184448	-	100
AzucenaRS1	ONG1100320	Chr11	11825953	11826007	mtDNA	NC_011033.1	372817..372870	+	96.36
AzucenaRS1	ONG1100320	Chr11	11826006	11826081	mtDNA	NC_011033.1	335955..336029	+	98.68
AzucenaRS1	ONG1100320	Chr11	11826143	11826291	mtDNA	NC_011033.1	346904..347052	-	100
AzucenaRS1	ONG1100320	Chr11	11826288	11826390	mtDNA	NC_011033.1	312170..312277	+	95.37
AzucenaRS1	ONG1100320	Chr11	11826390	11826460	mtDNA	NC_011033.1	332187..332257	+	98.59
AzucenaRS1	ONG1100320	Chr11	11826503	11826562	mtDNA	NC_011033.1	465408..465467	+	100
AzucenaRS1	ONG1100320	Chr11	11826562	11826611	mtDNA	NC_011033.1	477824..477873	-	100
AzucenaRS1	ONG1100320	Chr11	11826612	11826683	mtDNA	NC_011033.1	318996..319067	-	100
AzucenaRS1	ONG1100320	Chr11	11826725	11826816	mtDNA	NC_011033.1	237440..237531	+	100
AzucenaRS1	ONG1100320	Chr11	11826815	11826879	mtDNA	NC_011033.1	204068..204132	-	98.46
AzucenaRS1	ONG1100320	Chr11	11826874	11826942	mtDNA	NC_011033.1	378617..378685	-	98.55
AzucenaRS1	ONG1100320	Chr11	11826943	11827031	mtDNA	NC_011033.1	370710..370798	+	100
AzucenaRS1	ONG1100320	Chr11	11827028	11827096	mtDNA	NC_011033.1	250378..250446	+	100
AzucenaRS1	ONG1100320	Chr11	11827091	11827227	mtDNA	NC_011033.1	106068..106204	+	100
AzucenaRS1	ONG1100320	Chr11	11827273	11827340	mtDNA	NC_011033.1	255877..255944	+	100
AzucenaRS1	ONG1100320	Chr11	11827438	11827512	mtDNA	NC_011033.1	52691..52765	-	100
AzucenaRS1	ONG1100320	Chr11	11827512	11827623	mtDNA	NC_011033.1	433761..433872	+	98.21
AzucenaRS1	ONG1100320	Chr11	11827620	11827746	mtDNA	NC_011033.1	308414..308540	+	100
AzucenaRS1	ONG1100320	Chr11	11827748	11827856	mtDNA	NC_011033.1	486469..486577	-	98.17
AzucenaRS1	ONG1100320	Chr11	11827856	11827963	mtDNA	NC_011033.1	458802..458909	+	97.22
AzucenaRS1	ONG1100330	Chr11	11887317	11887385	mtDNA	NC_011033.1	251511..251579	-	98.55
AzucenaRS1	ONG1100340	Chr11	11919842	11920051	ptDNA	NC_001320.1	119365..119573	-	93.33
AzucenaRS1	ONG1100350	Chr11	12960779	12960874	mtDNA	NC_011033.1	369144..369239	+	100
AzucenaRS1	ONG1100350	Chr11	12960873	12960967	mtDNA	NC_011033.1	117843..117937	+	96.84
AzucenaRS1	ONG1100350	Chr11	12960982	12961168	ptDNA	NC_001320.1	17685..17872	-	98.4
AzucenaRS1	ONG1100350	Chr11	12961169	12961275	mtDNA	NC_011033.1	310415..310521	-	98.13
AzucenaRS1	ONG1100350	Chr11	12961276	12961402	ptDNA	NC_001320.1	35693..35819	+	96.06
AzucenaRS1	ONG1100360	Chr11	13066945	13067101	mtDNA	NC_011033.1	104504..104660	-	97.45
AzucenaRS1	ONG1100370	Chr11	13381650	13381786	mtDNA	NC_011033.1	90911..91047	+	91.97
AzucenaRS1	ONG1100380	Chr11	13678198	13678280	mtDNA	NC_011033.1	176270..176352	+	96.39
AzucenaRS1	ONG1100380	Chr11	13678276	13678385	mtDNA	NC_011033.1	383205..383314	-	98.18
AzucenaRS1	ONG1100390	Chr11	14198941	14199305	ptDNA	NC_001320.1	73672..74037	+	97.27
AzucenaRS1	ONG1100400	Chr11	14659458	14659775	ptDNA	NC_001320.1	16133..16450	-	99.69
AzucenaRS1	ONG1100400	Chr11	14659774	14660263	ptDNA	NC_001320.1	70526..71015	+	99.59
AzucenaRS1	ONG1100400	Chr11	14663973	14664192	mtDNA	NC_011033.1	232365..232584	-	99.09
AzucenaRS1	ONG1100400	Chr11	14664193	14664386	mtDNA	NC_011033.1	386980..387173	+	98.97
AzucenaRS1	ONG1100400	Chr11	14664429	14664536	mtDNA	NC_011033.1	239943..240050	+	97.22
AzucenaRS1	ONG1100400	Chr11	14664532	14664642	mtDNA	NC_011033.1	329401..329512	-	97.32
AzucenaRS1	ONG1100410	Chr11	14864289	14864417	mtDNA	NC_011033.1	46463..46595	+	90.23
AzucenaRS1	ONG1100420	Chr11	15420480	15420590	mtDNA	NC_011033.1	459284..459394	-	96.4
AzucenaRS1	ONG1100430	Chr11	15542972	15543023	mtDNA	NC_011033.1	236418..236470	-	98.11
AzucenaRS1	ONG1100440	Chr11	15900879	15900965	ptDNA	NC_001320.1	36030..36116	-	98.85
AzucenaRS1	ONG1100450	Chr11	16328106	16328201	mtDNA	NC_011033.1	350065..350161	+	92.78
AzucenaRS1	ONG1100460	Chr11	16413336	16413452	ptDNA	NC_001320.1	90483..90600	+	90.76
AzucenaRS1	ONG1100470	Chr11	16644815	16644993	ptDNA	NC_001320.1	19419..19595	+	88.4
AzucenaRS1	ONG1100470	Chr11	16649583	16649847	ptDNA	NC_001320.1	19419..19680	+	89.14
AzucenaRS1	ONG1100480	Chr11	16974714	16974835	mtDNA	NC_011033.1	231322..231444	+	91.87
AzucenaRS1	ONG1100490	Chr11	17126249	17126593	mtDNA	NC_011033.1	261995..262339	+	98.84
AzucenaRS1	ONG1100510	Chr11	18056579	18056673	mtDNA	NC_011033.1	359926..360021	-	96.88
AzucenaRS1	ONG1100520	Chr11	18176151	18176224	mtDNA	NC_011033.1	131074..131147	-	97.3
AzucenaRS1	ONG1100530	Chr11	18733330	18733490	mtDNA	NC_011033.1	282435..282590	+	90.68
AzucenaRS1	ONG1100540	Chr11	18999095	18999334	ptDNA	NC_001320.1	2045..2284	+	95.83
AzucenaRS1	ONG1100550	Chr11	19129639	19129812	ptDNA	NC_001320.1	8083..8256	-	96.57
AzucenaRS1	ONG1100550	Chr11	19129829	19130027	ptDNA	NC_001320.1	70639..70838	+	95.5
AzucenaRS1	ONG1100560	Chr11	19761742	19762979	ptDNA	NC_001320.1	54507..55737	-	94.03
AzucenaRS1	ONG1100560	Chr11	19798468	19799905	ptDNA	NC_001320.1	53146..54610	+	92.65
AzucenaRS1	ONG1100560	Chr11	19805038	19806604	ptDNA	NC_001320.1	54610..56185	+	93.99
AzucenaRS1	ONG1100570	Chr11	19956461	19956646	mtDNA	NC_011033.1	322716..322901	-	97.85
AzucenaRS1	ONG1100610	Chr11	22290593	22290858	mtDNA	NC_011033.1	330158..330455	+	79.6
AzucenaRS1	ONG1100620	Chr11	22715177	22715362	mtDNA	NC_011033.1	231937..232136	+	86
AzucenaRS1	ONG1100630	Chr11	23018201	23018595	ptDNA	NC_001320.1	6919..7313	-	99.49
AzucenaRS1	ONG1100650	Chr11	23520745	23520960	ptDNA	NC_001320.1	56352..56566	-	95.37
AzucenaRS1	ONG1100660	Chr11	23868721	23868882	mtDNA	NC_011033.1	128626..128788	-	93.87
AzucenaRS1	ONG1100660	Chr11	23868883	23869018	mtDNA	NC_011033.1	335847..335983	+	98.54
AzucenaRS1	ONG1100690	Chr11	24120654	24120909	ptDNA	NC_001320.1	7810..8062	+	96.09
AzucenaRS1	ONG1100700	Chr11	24539648	24539731	mtDNA	NC_011033.1	417535..417617	-	96.43
AzucenaRS1	ONG1100710	Chr11	24795996	24796199	ptDNA	NC_001320.1	106076..106273	-	91.67
AzucenaRS1	ONG1100720	Chr11	25840274	25840435	mtDNA	NC_011033.1	358190..358351	+	98.15
AzucenaRS1	ONG1100730	Chr11	25919943	25920086	ptDNA	NC_001320.1	66741..66885	-	95.86
AzucenaRS1	ONG1100730	Chr11	25919943	25920086	ptDNA	NC_001320.1	66741..66885	-	95.86
AzucenaRS1	ONG1100760	Chr11	27181438	27181566	mtDNA	NC_011033.1	48896..49024	-	93.8
AzucenaRS1	ONG1200010	Chr12	69371	69592	mtDNA	NC_011033.1	420872..421093	-	98.2
AzucenaRS1	ONG1200010	Chr12	69810	69916	mtDNA	NC_011033.1	420769..420875	-	95.33
AzucenaRS1	ONG1200020	Chr12	98644	98872	mtDNA	NC_011033.1	60964..61181	-	92.61
AzucenaRS1	ONG1200030	Chr12	608469	608559	mtDNA	NC_011033.1	233038..233128	-	95.6
AzucenaRS1	ONG1200040	Chr12	845391	845442	mtDNA	NC_011033.1	71239..71290	+	100
AzucenaRS1	ONG1200040	Chr12	845443	845514	mtDNA	NC_011033.1	260486..260557	-	97.22
AzucenaRS1	ONG1200050	Chr12	2760953	2761171	mtDNA	NC_011033.1	241244..241474	+	86.27
AzucenaRS1	ONG1200060	Chr12	2876669	2876797	ptDNA	NC_001320.1	107203..107331	+	96.9
AzucenaRS1	ONG1200080	Chr12	3076173	3076247	mtDNA	NC_011033.1	268172..268246	+	98.67
AzucenaRS1	ONG1200080	Chr12	3076247	3076364	ptDNA	NC_001320.1	74284..74391	-	90.68
AzucenaRS1	ONG1200080	Chr12	3076398	3076456	mtDNA	NC_011033.1	195606..195664	+	100
AzucenaRS1	ONG1200080	Chr12	3076454	3076520	mtDNA	NC_011033.1	235224..235290	+	100
AzucenaRS1	ONG1200080	Chr12	3076519	3076594	ptDNA	NC_001320.1	22732..22807	-	100
AzucenaRS1	ONG1200090	Chr12	4458941	4459268	ptDNA	NC_001320.1	61174..61511	+	87.5
AzucenaRS1	ONG1200090	Chr12	4456257	4456504	ptDNA	NC_001320.1	63441..63688	-	91.6
AzucenaRS1	ONG1200100	Chr12	4513819	4513949	mtDNA	NC_011033.1	106943..107073	-	97.71
AzucenaRS1	ONG1200100	Chr12	4513950	4514073	mtDNA	NC_011033.1	362827..362949	+	97.58
AzucenaRS1	ONG1200100	Chr12	4514074	4514235	mtDNA	NC_011033.1	395804..395965	+	98.77
AzucenaRS1	ONG1200100	Chr12	4514235	4514355	mtDNA	NC_011033.1	50022..50142	+	97.52
AzucenaRS1	ONG1200110	Chr12	4609423	4609496	mtDNA	NC_011033.1	328207..328280	-	98.65
AzucenaRS1	ONG1200120	Chr12	4622987	4623066	mtDNA	NC_011033.1	341385..341464	-	98.75
AzucenaRS1	ONG1200120	Chr12	4623067	4623177	mtDNA	NC_011033.1	176842..176952	-	100
AzucenaRS1	ONG1200120	Chr12	4623172	4623240	mtDNA	NC_011033.1	207585..207653	-	98.55
AzucenaRS1	ONG1200120	Chr12	4623239	4623395	mtDNA	NC_011033.1	302308..302464	+	98.73
AzucenaRS1	ONG1200120	Chr12	4623392	4623486	mtDNA	NC_011033.1	303900..303994	+	100
AzucenaRS1	ONG1200120	Chr12	4623489	4623538	ptDNA	NC_001320.1	33409..33458	+	100
AzucenaRS1	ONG1200120	Chr12	4623539	4623603	mtDNA	NC_011033.1	385479..385543	+	96.92
AzucenaRS1	ONG1200120	Chr12	4623594	4623797	mtDNA	NC_011033.1	342609..342812	-	100
AzucenaRS1	ONG1200120	Chr12	4623798	4623918	mtDNA	NC_011033.1	267819..267939	-	99.17
AzucenaRS1	ONG1200120	Chr12	4623919	4624038	mtDNA	NC_011033.1	249528..249647	+	100
AzucenaRS1	ONG1200120	Chr12	4624039	4624107	mtDNA	NC_011033.1	103889..103957	+	100
AzucenaRS1	ONG1200120	Chr12	4624105	4624211	mtDNA	NC_011033.1	309054..309160	-	92.52
AzucenaRS1	ONG1200120	Chr12	4624242	4624317	mtDNA	NC_011033.1	305074..305149	-	100
AzucenaRS1	ONG1200120	Chr12	4624316	4624403	mtDNA	NC_011033.1	384649..384736	-	100
AzucenaRS1	ONG1200120	Chr12	4624402	4624740	mtDNA	NC_011033.1	921..1259	-	99.71
AzucenaRS1	ONG1200120	Chr12	4624739	4624826	mtDNA	NC_011033.1	444830..444917	-	100
AzucenaRS1	ONG1200120	Chr12	4624826	4624894	mtDNA	NC_011033.1	74974..75042	-	98.55
AzucenaRS1	ONG1200120	Chr12	4624894	4625151	mtDNA	NC_011033.1	182742..183001	-	98.85
AzucenaRS1	ONG1200120	Chr12	4625220	4625457	mtDNA	NC_011033.1	426086..426323	+	100
AzucenaRS1	ONG1200120	Chr12	4625458	4625635	mtDNA	NC_011033.1	289206..289383	+	98.88
AzucenaRS1	ONG1200120	Chr12	4625636	4625718	mtDNA	NC_011033.1	383573..383655	-	97.59
AzucenaRS1	ONG1200120	Chr12	4625753	4625897	mtDNA	NC_011033.1	318229..318373	+	97.93
AzucenaRS1	ONG1200120	Chr12	4625896	4626004	mtDNA	NC_011033.1	270710..270818	-	99.08
AzucenaRS1	ONG1200120	Chr12	4626027	4626114	mtDNA	NC_011033.1	278016..278103	+	100
AzucenaRS1	ONG1200120	Chr12	4626113	4626183	mtDNA	NC_011033.1	309539..309609	-	98.59
AzucenaRS1	ONG1200120	Chr12	4626182	4626244	ptDNA	NC_001320.1	34310..34372	+	100
AzucenaRS1	ONG1200120	Chr12	4626242	4626343	mtDNA	NC_011033.1	47348..47449	-	100
AzucenaRS1	ONG1200120	Chr12	4626343	4626478	mtDNA	NC_011033.1	47393..47528	-	97.06
AzucenaRS1	ONG1200120	Chr12	4626479	4626534	mtDNA	NC_011033.1	364154..364209	-	100
AzucenaRS1	ONG1200130	Chr12	4697686	4697903	ptDNA	NC_001320.1	84446..84668	+	86.61
AzucenaRS1	ONG1200130	Chr12	4697686	4697903	ptDNA	NC_001320.1	130450..130672	-	86.61
AzucenaRS1	ONG1200130	Chr12	4698582	4698846	mtDNA	NC_011033.1	57781..58047	-	88.81
AzucenaRS1	ONG1200140	Chr12	4762675	4762902	ptDNA	NC_001320.1	15420..15647	+	98.68
AzucenaRS1	ONG1200150	Chr12	5070594	5070938	ptDNA	NC_001320.1	56014..56357	+	96.81
AzucenaRS1	ONG1200160	Chr12	5608574	5613065	ptDNA	NC_001320.1	71620..76109	+	99.69
AzucenaRS1	ONG1200160	Chr12	5613061	5614888	ptDNA	NC_001320.1	76044..77873	+	99.56
AzucenaRS1	ONG1200160	Chr12	5565443	5572414	ptDNA	NC_001320.1	48881..55839	+	98.85
AzucenaRS1	ONG1200160	Chr12	5572416	5592104	ptDNA	NC_001320.1	98923..118635	+	99.2
AzucenaRS1	ONG1200160	Chr12	5592102	5605443	ptDNA	NC_001320.1	58232..71624	+	98.93
AzucenaRS1	ONG1200210	Chr12	6059272	6059353	mtDNA	NC_011033.1	405550..405632	+	95.18
AzucenaRS1	ONG1200210	Chr12	6063776	6064304	ptDNA	NC_001320.1	95313..95841	-	100
AzucenaRS1	ONG1200220	Chr12	6128663	6128758	ptDNA	NC_001320.1	91977..92073	-	98.97
AzucenaRS1	ONG1200240	Chr12	6947662	6947831	mtDNA	NC_011033.1	149802..149971	-	98.82
AzucenaRS1	ONG1200240	Chr12	6947831	6947975	mtDNA	NC_011033.1	241905..242049	-	100
AzucenaRS1	ONG1200260	Chr12	7962495	7962567	mtDNA	NC_011033.1	87115..87187	-	98.63
AzucenaRS1	ONG1200270	Chr12	8364380	8364521	mtDNA	NC_011033.1	369101..369243	-	93.01
AzucenaRS1	ONG1200280	Chr12	8407006	8407299	mtDNA	NC_011033.1	257089..257382	-	96.26
AzucenaRS1	ONG1200280	Chr12	8429416	8429709	mtDNA	NC_011033.1	257089..257382	-	96.26
AzucenaRS1	ONG1200290	Chr12	8958945	8959150	ptDNA	NC_001320.1	70873..71076	+	91.75
AzucenaRS1	ONG1200300	Chr12	9068073	9068276	mtDNA	NC_011033.1	203140..203353	-	87.85
AzucenaRS1	ONG1200300	Chr12	9068278	9068378	mtDNA	NC_011033.1	317356..317456	+	96.04
AzucenaRS1	ONG1200300	Chr12	9071572	9071775	ptDNA	NC_001320.1	90495..90698	+	97.07
AzucenaRS1	ONG1200330	Chr12	10967229	10967392	ptDNA	NC_001320.1	87825..87989	+	95.15
AzucenaRS1	ONG1200340	Chr12	11107496	11108066	ptDNA	NC_001320.1	45647..46224	+	98.62
AzucenaRS1	ONG1200340	Chr12	11125784	11126183	ptDNA	NC_001320.1	73100..73500	-	99.5
AzucenaRS1	ONG1200340	Chr12	11119879	11125784	ptDNA	NC_001320.1	46218..52118	+	99.42
AzucenaRS1	ONG1200350	Chr12	11257113	11258538	ptDNA	NC_001320.1	80603..82049	+	96.75
AzucenaRS1	ONG1200350	Chr12	11253068	11257108	ptDNA	NC_001320.1	16..4059	-	98.62
AzucenaRS1	ONG1200360	Chr12	11425732	11425916	ptDNA	NC_001320.1	34039..34226	+	91.05
AzucenaRS1	ONG1200370	Chr12	12255046	12255137	mtDNA	NC_011033.1	107888..107979	-	100
AzucenaRS1	ONG1200370	Chr12	12255134	12255213	mtDNA	NC_011033.1	314699..314778	-	100
AzucenaRS1	ONG1200380	Chr12	12278496	12278703	mtDNA	NC_011033.1	185219..185426	-	99.52
AzucenaRS1	ONG1200390	Chr12	12807058	12807163	ptDNA	NC_001320.1	86704..86809	+	97.17
AzucenaRS1	ONG1200450	Chr12	17446150	17446758	ptDNA	NC_001320.1	81431..82038	-	98.19
AzucenaRS1	ONG1200470	Chr12	17965802	17966568	mtDNA	NC_011033.1	1628..2413	-	91.23
AzucenaRS1	ONG1200480	Chr12	17980900	17981030	mtDNA	NC_011033.1	381632..381763	-	93.94
AzucenaRS1	ONG1200480	Chr12	17980900	17981030	mtDNA	NC_011033.1	462719..462850	-	93.94
AzucenaRS1	ONG1200490	Chr12	18483904	18484031	ptDNA	NC_001320.1	64964..65091	+	92.19
AzucenaRS1	ONG1200500	Chr12	18704460	18704936	ptDNA	NC_001320.1	80133..80606	-	94.36
AzucenaRS1	ONG1200520	Chr12	19522411	19522655	ptDNA	NC_001320.1	35248..35491	-	97.14
AzucenaRS1	ONG1200520	Chr12	19522654	19523002	ptDNA	NC_001320.1	123084..123432	-	98.85
AzucenaRS1	ONG1200530	Chr12	19618938	19619186	ptDNA	NC_001320.1	13883..14139	-	91.86
AzucenaRS1	ONG1200530	Chr12	19619412	19621392	ptDNA	NC_001320.1	11831..13896	-	92.01
AzucenaRS1	ONG1200540	Chr12	20068870	20069052	mtDNA	NC_011033.1	359776..359955	-	95.63
AzucenaRS1	ONG1200570	Chr12	20720276	20720374	ptDNA	NC_001320.1	55876..55974	+	97.98
AzucenaRS1	ONG1200580	Chr12	20827917	20827978	ptDNA	NC_001320.1	50865..50926	-	98.39
AzucenaRS1	ONG1200590	Chr12	21169451	21169964	mtDNA	NC_011033.1	289712..290226	+	96.7
AzucenaRS1	ONG1200600	Chr12	21396588	21396985	mtDNA	NC_011033.1	373632..374030	+	98.75
AzucenaRS1	ONG1200600	Chr12	21402331	21402622	mtDNA	NC_011033.1	419772..420063	-	96.58
AzucenaRS1	ONG1200600	Chr12	21402624	21402963	mtDNA	NC_011033.1	76806..77143	+	95.88
AzucenaRS1	ONG1200600	Chr12	21402961	21403061	mtDNA	NC_011033.1	294965..295064	+	93.07
AzucenaRS1	ONG1200600	Chr12	21396985	21397627	mtDNA	NC_011033.1	260905..261575	-	94.49
AzucenaRS1	ONG1200610	Chr12	21756919	21757131	mtDNA	NC_011033.1	6079..6291	+	94.37
AzucenaRS1	ONG1200610	Chr12	21757131	21757533	mtDNA	NC_011033.1	378615..379017	-	95.53
AzucenaRS1	ONG1200620	Chr12	22120370	22120519	mtDNA	NC_011033.1	215620..215769	+	100
AzucenaRS1	ONG1200630	Chr12	22271339	22271688	ptDNA	NC_001320.1	45494..45845	+	98.01
AzucenaRS1	ONG1200630	Chr12	22271842	22272192	ptDNA	NC_001320.1	45494..45845	+	97.73
AzucenaRS1	ONG1200630	Chr12	22272346	22272696	ptDNA	NC_001320.1	45494..45845	+	98.58
AzucenaRS1	ONG1200640	Chr12	22481040	22481134	ptDNA	NC_001320.1	36938..37032	-	100
AzucenaRS1	ONG1200650	Chr12	23203147	23203322	mtDNA	NC_011033.1	293378..293553	-	90.91
AzucenaRS1	ONG1200660	Chr12	23339059	23339505	mtDNA	NC_011033.1	361093..361549	+	91.68
AzucenaRS1	ONG1200670	Chr12	23685376	23686313	mtDNA	NC_011033.1	79717..80663	-	93.68
AzucenaRS1	ONG1200680	Chr12	23845289	23845369	mtDNA	NC_011033.1	99953..100033	+	98.77
AzucenaRS1	ONG1200680	Chr12	23845426	23845559	ptDNA	NC_001320.1	95219..95352	-	96.27
AzucenaRS1	ONG1200680	Chr12	23845551	23845671	mtDNA	NC_011033.1	52696..52816	-	96.69
AzucenaRS1	ONG1200690	Chr12	24333846	24333942	mtDNA	NC_011033.1	407723..407819	+	96.91
AzucenaRS1	ONG1200700	Chr12	24425420	24425786	ptDNA	NC_001320.1	39293..39656	-	91.33
AzucenaRS1	ONG1200710	Chr12	24514306	24514611	ptDNA	NC_001320.1	117041..117358	+	91.85
AzucenaRS1	ONG1200710	Chr12	24514678	24514807	mtDNA	NC_011033.1	111908..112037	+	96.92
AzucenaRS1	ONG1200710	Chr12	24514880	24515084	mtDNA	NC_011033.1	252199..252403	-	97.56
AzucenaRS1	ONG1200710	Chr12	24515081	24515225	mtDNA	NC_011033.1	90504..90650	+	94.56
AzucenaRS1	ONG1200710	Chr12	24515232	24515449	mtDNA	NC_011033.1	331616..331834	-	98.17
AzucenaRS1	ONG1200710	Chr12	24515611	24515717	mtDNA	NC_011033.1	211425..211535	+	95.5
AzucenaRS1	ONG1200710	Chr12	24515718	24515793	mtDNA	NC_011033.1	394418..394493	-	98.68
AzucenaRS1	ONG1200710	Chr12	24515792	24515942	mtDNA	NC_011033.1	51448..51598	-	98.68
AzucenaRS1	ONG1200710	Chr12	24515941	24516007	mtDNA	NC_011033.1	126663..126729	-	97.01
AzucenaRS1	ONG1200710	Chr12	24516056	24516216	mtDNA	NC_011033.1	180544..180706	-	95.71
AzucenaRS1	ONG1200710	Chr12	24516205	24516300	mtDNA	NC_011033.1	45560..45654	+	96.88
AzucenaRS1	ONG1200710	Chr12	24516361	24516450	mtDNA	NC_011033.1	471776..471865	-	100
AzucenaRS1	ONG1200710	Chr12	24516451	24516555	mtDNA	NC_011033.1	458494..458598	-	98.1
AzucenaRS1	ONG1200710	Chr12	24516555	24516709	mtDNA	NC_011033.1	280692..280846	+	98.71
AzucenaRS1	ONG1200710	Chr12	24516710	24516811	ptDNA	NC_001320.1	66205..66306	+	97.06
AzucenaRS1	ONG1200710	Chr12	24516808	24516894	mtDNA	NC_011033.1	373440..373526	-	96.55
AzucenaRS1	ONG1200720	Chr12	25971246	25971310	ptDNA	NC_001320.1	84338..84402	+	96.92
AzucenaRS1	ONG1200730	Chr12	26355088	26355211	ptDNA	NC_001320.1	82629..82763	+	86.67
AzucenaRS1	ONG1200730	Chr12	26355122	26355382	mtDNA	NC_011033.1	124927..125189	-	93.16
AzucenaRS1	ONG0600750	Chr6	6103063	6103246	mtDNA	NC_011033.1	106540..106723	-	99.46
AzucenaRS1	ONG1100790	Chr11	6189581	6189685	ptDNA	NC_001320.1	110814..110917	+	92.38
AzucenaRS1	ONG0500630	Chr5	29298096	29298152	mtDNA	NC_011033.1	61875..61931	+	100
AzucenaRS1	ONG0600780	Chr6	4584652	4584859	mtDNA	NC_011033.1	319739..319947	-	89.95
AzucenaRS1	ONG1200780	Chr12	18988360	18988616	mtDNA	NC_011033.1	230029..230286	+	94.96
AzucenaRS1	ONG1200780	Chr12	18988618	18988833	mtDNA	NC_011033.1	112972..113187	-	98.15
AzucenaRS1	ONG0500640	Chr5	29392600	29392984	ptDNA	NC_001320.1	106378..106762	+	98.96
AzucenaRS1	ONG1000580	Chr10	4545753	4545886	ptDNA	NC_001320.1	129328..129461	-	98.51
AzucenaRS1	ONG1000580	Chr10	4546072	4546168	ptDNA	NC_001320.1	73717..73804	+	90.72
AzucenaRS1	ONG1000580	Chr10	4546167	4546238	ptDNA	NC_001320.1	78069..78140	-	97.22
AzucenaRS1	ONG1000580	Chr10	4546267	4546351	ptDNA	NC_001320.1	66090..66174	-	98.82
AzucenaRS1	ONG0301010	Chr3	1532563	1532662	ptDNA	NC_001320.1	133074..133173	+	95
AzucenaRS1	ONG0800710	Chr8	11937864	11940668	ptDNA	NC_001320.1	65143..67941	-	99.11
AzucenaRS1	ONG0800720	Chr8	8184526	8184686	ptDNA	NC_001320.1	117002..117161	-	96.27
AzucenaRS1	ONG0800730	Chr8	12661179	12661258	ptDNA	NC_001320.1	45123..45202	+	96.25
AzucenaRS1	ONG0700690	Chr7	19244279	19244471	mtDNA	NC_011033.1	95159..95351	-	90.67
AzucenaRS1	ONG1100820	Chr11	9091948	9092182	mtDNA	NC_011033.1	358568..358822	+	85.99
AzucenaRS1	ONG1200790	Chr12	15163824	15163902	mtDNA	NC_011033.1	85643..85721	-	96.2
AzucenaRS1	ONG0200910	Chr2	18331936	18332052	ptDNA	NC_001320.1	10178..10294	-	100
AzucenaRS1	ONG1200800	Chr12	13928724	13928915	ptDNA	NC_001320.1	59826..60024	-	91.96
AzucenaRS1	ONG0500650	Chr5	20991013	20991243	mtDNA	NC_011033.1	72452..72682	+	96.54
AzucenaRS1	ONG0500660	Chr5	21363274	21363424	ptDNA	NC_001320.1	32369..32521	-	89.54
AzucenaRS1	ONG0101270	Chr1	24096644	24096746	mtDNA	NC_011033.1	380391..380493	-	97.09
AzucenaRS1	ONG0301030	Chr3	18460414	18460477	mtDNA	NC_011033.1	228277..228340	-	98.44
AzucenaRS1	ONG0101300	Chr1	39634927	39635073	ptDNA	NC_001320.1	91306..91453	-	88.51
AzucenaRS1	ONG0101300	Chr1	39634927	39635073	ptDNA	NC_001320.1	123665..123812	+	88.51
AzucenaRS1	ONG1000620	Chr10	21676259	21680177	ptDNA	NC_001320.1	60719..64632	-	99.41
AzucenaRS1	ONG1000620	Chr10	21680177	21685243	ptDNA	NC_001320.1	21317..26399	-	99.49
AzucenaRS1	ONG0200890	Chr2	36371563	36372011	ptDNA	NC_001320.1	47509..47957	-	91.17
AzucenaRS1	ONG0900660	Chr9	5325565	5325700	mtDNA	NC_011033.1	365426..365561	+	98.53
AzucenaRS1	ONG0900660	Chr9	5325970	5326236	mtDNA	NC_011033.1	202288..202554	+	100
AzucenaRS1	ONG0900660	Chr9	5326238	5326362	mtDNA	NC_011033.1	94520..94644	+	98.4
AzucenaRS1	ONG0900660	Chr9	5326364	5326439	mtDNA	NC_011033.1	376355..376430	+	98.68
AzucenaRS1	ONG0900660	Chr9	5326439	5326570	mtDNA	NC_011033.1	238130..238261	-	100
AzucenaRS1	ONG0900660	Chr9	5326571	5326675	mtDNA	NC_011033.1	335482..335586	-	100
AzucenaRS1	ONG0900660	Chr9	5329861	5330071	mtDNA	NC_011033.1	263697..263915	-	95.89
AzucenaRS1	ONG0900660	Chr9	5330071	5330167	ptDNA	NC_001320.1	126458..126554	+	100
AzucenaRS1	ONG0900660	Chr9	5330166	5330318	mtDNA	NC_011033.1	102502..102654	-	98.04
AzucenaRS1	ONG0900660	Chr9	5330319	5330382	mtDNA	NC_011033.1	175553..175616	+	98.44
AzucenaRS1	ONG0900660	Chr9	5330384	5330489	mtDNA	NC_011033.1	386506..386611	+	99.06
AzucenaRS1	ONG0900660	Chr9	5330489	5330539	mtDNA	NC_011033.1	54512..54562	+	100
AzucenaRS1	ONG0900660	Chr9	5330598	5330720	mtDNA	NC_011033.1	202677..202799	-	100
AzucenaRS1	ONG0900660	Chr9	5330721	5330825	ptDNA	NC_001320.1	19164..19268	-	100
AzucenaRS1	ONG0900660	Chr9	5331029	5331143	mtDNA	NC_011033.1	126381..126495	-	100
AzucenaRS1	ONG0900660	Chr9	5331144	5331256	ptDNA	NC_001320.1	37699..37811	+	100
AzucenaRS1	ONG0900660	Chr9	5331258	5331392	mtDNA	NC_011033.1	192714..192848	+	100
AzucenaRS1	ONG0900660	Chr9	5331439	5331645	mtDNA	NC_011033.1	152456..152662	+	99.52
AzucenaRS1	ONG0900660	Chr9	5331723	5331849	mtDNA	NC_011033.1	246506..246632	-	100
AzucenaRS1	ONG0900660	Chr9	5331849	5331924	mtDNA	NC_011033.1	406072..406147	-	98.68
AzucenaRS1	ONG0900660	Chr9	5332080	5332257	mtDNA	NC_011033.1	422693..422870	+	99.44
AzucenaRS1	ONG0900660	Chr9	5332258	5332420	mtDNA	NC_011033.1	51325..51487	-	100
AzucenaRS1	ONG0900660	Chr9	5332420	5332792	mtDNA	NC_011033.1	13060..13432	+	99.46
AzucenaRS1	ONG0900660	Chr9	5332862	5333020	mtDNA	NC_011033.1	304929..305087	-	98.11
AzucenaRS1	ONG0900660	Chr9	5333021	5333155	mtDNA	NC_011033.1	284013..284147	-	98.52
AzucenaRS1	ONG0900660	Chr9	5333152	5333275	mtDNA	NC_011033.1	314862..314986	+	99.2
AzucenaRS1	ONG0900660	Chr9	5336390	5336486	mtDNA	NC_011033.1	281445..281541	+	98.97
AzucenaRS1	ONG0900660	Chr9	5336487	5336585	mtDNA	NC_011033.1	293781..293879	+	100
AzucenaRS1	ONG0900660	Chr9	5336585	5336732	mtDNA	NC_011033.1	103613..103760	+	100
AzucenaRS1	ONG0900660	Chr9	5336733	5336904	mtDNA	NC_011033.1	204934..205105	-	98.84
AzucenaRS1	ONG0900660	Chr9	5336905	5337207	mtDNA	NC_011033.1	213144..213446	+	99.01
AzucenaRS1	ONG0900660	Chr9	5337246	5337322	ptDNA	NC_001320.1	82471..82547	+	100
AzucenaRS1	ONG0900660	Chr9	5337324	5337406	mtDNA	NC_011033.1	242073..242155	-	100
AzucenaRS1	ONG0900660	Chr9	5337549	5337703	mtDNA	NC_011033.1	347427..347581	+	100
AzucenaRS1	ONG0900660	Chr9	5337757	5338020	mtDNA	NC_011033.1	203441..203704	-	99.24
AzucenaRS1	ONG0900660	Chr9	5338019	5338190	mtDNA	NC_011033.1	202746..202917	-	98.84
AzucenaRS1	ONG0900660	Chr9	5338190	5338517	mtDNA	NC_011033.1	54410..54737	-	98.48
AzucenaRS1	ONG0900660	Chr9	5338569	5339004	mtDNA	NC_011033.1	47208..47644	+	98.4
AzucenaRS1	ONG0900660	Chr9	5339006	5339112	mtDNA	NC_011033.1	245673..245779	+	100
AzucenaRS1	ONG0900660	Chr9	5339112	5339171	mtDNA	NC_011033.1	303237..303296	+	100
AzucenaRS1	ONG0900660	Chr9	5339172	5339235	mtDNA	NC_011033.1	337831..337894	+	100
AzucenaRS1	ONG0900660	Chr9	5339235	5339312	mtDNA	NC_011033.1	299588..299665	-	98.72
AzucenaRS1	ONG0900660	Chr9	5339312	5339463	mtDNA	NC_011033.1	305631..305781	-	97.37
AzucenaRS1	ONG0900660	Chr9	5339467	5339580	mtDNA	NC_011033.1	167267..167380	+	100
AzucenaRS1	ONG0900660	Chr9	5339582	5339783	mtDNA	NC_011033.1	81999..82200	-	98.51
AzucenaRS1	ONG0900660	Chr9	5339784	5340113	mtDNA	NC_011033.1	162359..162688	-	98.48
AzucenaRS1	ONG0900660	Chr9	5340114	5340172	mtDNA	NC_011033.1	249894..249952	+	100
AzucenaRS1	ONG0900660	Chr9	5340174	5340245	mtDNA	NC_011033.1	392254..392325	+	100
AzucenaRS1	ONG0900660	Chr9	5340246	5340583	mtDNA	NC_011033.1	28856..29193	-	99.41
AzucenaRS1	ONG0900660	Chr9	5340621	5340763	mtDNA	NC_011033.1	382035..382177	-	97.9
AzucenaRS1	ONG0900660	Chr9	5340760	5341136	mtDNA	NC_011033.1	325721..326097	-	98.94
AzucenaRS1	ONG0900660	Chr9	5341240	5341330	mtDNA	NC_011033.1	37207..37297	-	100
AzucenaRS1	ONG0900660	Chr9	5341359	5341442	mtDNA	NC_011033.1	57221..57304	-	100
AzucenaRS1	ONG0900660	Chr9	5341443	5341567	mtDNA	NC_011033.1	68498..68622	-	99.2
AzucenaRS1	ONG0900660	Chr9	5341567	5341694	mtDNA	NC_011033.1	296488..296615	+	97.66
AzucenaRS1	ONG0900660	Chr9	5341695	5341864	mtDNA	NC_011033.1	72976..73145	-	98.82
AzucenaRS1	ONG0900660	Chr9	5341864	5342180	mtDNA	NC_011033.1	287905..288221	+	99.05
AzucenaRS1	ONG0900660	Chr9	5342341	5342443	mtDNA	NC_011033.1	51835..51937	+	99.03
AzucenaRS1	ONG0900660	Chr9	5342445	5342569	mtDNA	NC_011033.1	486299..486423	+	100
AzucenaRS1	ONG0900660	Chr9	5342569	5342728	mtDNA	NC_011033.1	453266..453425	+	99.38
AzucenaRS1	ONG0900660	Chr9	5342725	5342820	mtDNA	NC_011033.1	8304..8399	+	100
AzucenaRS1	ONG0900660	Chr9	5342822	5342921	mtDNA	NC_011033.1	335112..335211	-	99
AzucenaRS1	ONG0900660	Chr9	5342922	5343061	mtDNA	NC_011033.1	140682..140821	+	99.29
AzucenaRS1	ONG0900660	Chr9	5343062	5343281	mtDNA	NC_011033.1	333585..333804	-	99.55
AzucenaRS1	ONG0900660	Chr9	5343282	5343414	mtDNA	NC_011033.1	132260..132392	-	100
AzucenaRS1	ONG0900660	Chr9	5343417	5343472	ptDNA	NC_001320.1	97810..97865	+	100
AzucenaRS1	ONG0900660	Chr9	5343518	5343575	mtDNA	NC_011033.1	258157..258214	-	100
AzucenaRS1	ONG0900660	Chr9	5343576	5343657	mtDNA	NC_011033.1	258133..258214	+	100
AzucenaRS1	ONG0900660	Chr9	5343768	5343893	mtDNA	NC_011033.1	399250..399375	-	99.21
AzucenaRS1	ONG0900660	Chr9	5343938	5344059	mtDNA	NC_011033.1	353195..353316	+	98.36
AzucenaRS1	ONG0900660	Chr9	5344056	5344184	mtDNA	NC_011033.1	252446..252574	+	100
AzucenaRS1	ONG0900660	Chr9	5344183	5344292	ptDNA	NC_001320.1	117253..117362	-	100
AzucenaRS1	ONG0900660	Chr9	5344338	5344440	mtDNA	NC_011033.1	258112..258214	-	98.06
AzucenaRS1	ONG0900660	Chr9	5344442	5344543	mtDNA	NC_011033.1	7259..7360	-	100
AzucenaRS1	ONG0900660	Chr9	5344542	5344695	mtDNA	NC_011033.1	34171..34324	-	99.35
AzucenaRS1	ONG0900660	Chr9	5344698	5344806	mtDNA	NC_011033.1	464713..464821	+	99.08
AzucenaRS1	ONG0900660	Chr9	5344854	5344956	mtDNA	NC_011033.1	465805..465907	+	100
AzucenaRS1	ONG0900660	Chr9	5344957	5345322	mtDNA	NC_011033.1	61205..61570	+	99.18
AzucenaRS1	ONG0900660	Chr9	5345322	5345391	mtDNA	NC_011033.1	281956..282025	+	100
AzucenaRS1	ONG0900660	Chr9	5345391	5345604	mtDNA	NC_011033.1	90959..91172	+	98.6
AzucenaRS1	ONG0900660	Chr9	5345605	5345964	mtDNA	NC_011033.1	190540..190899	-	99.44
AzucenaRS1	ONG0900660	Chr9	5345964	5346413	ptDNA	NC_001320.1	50056..50506	-	98.89
AzucenaRS1	ONG0900660	Chr9	5346414	5346523	mtDNA	NC_011033.1	183114..183223	-	100
AzucenaRS1	ONG0900660	Chr9	5346524	5346611	mtDNA	NC_011033.1	311747..311834	-	100
AzucenaRS1	ONG0900660	Chr9	5346612	5346788	mtDNA	NC_011033.1	86275..86451	-	100
AzucenaRS1	ONG0900660	Chr9	5346789	5346919	mtDNA	NC_011033.1	194482..194611	-	98.47
AzucenaRS1	ONG0900660	Chr9	5346919	5347061	mtDNA	NC_011033.1	119086..119228	-	100
AzucenaRS1	ONG0900660	Chr9	5347060	5347133	mtDNA	NC_011033.1	222475..222548	+	100
AzucenaRS1	ONG0900660	Chr9	5347138	5347330	mtDNA	NC_011033.1	340983..341175	+	99.48
AzucenaRS1	ONG0900660	Chr9	5347323	5347726	mtDNA	NC_011033.1	224412..224814	-	99.01
AzucenaRS1	ONG0900660	Chr9	5347726	5347821	mtDNA	NC_011033.1	135492..135587	+	98.96
AzucenaRS1	ONG0900660	Chr9	5347821	5348012	mtDNA	NC_011033.1	226062..226253	-	100
AzucenaRS1	ONG0900660	Chr9	5348012	5348095	mtDNA	NC_011033.1	252699..252782	-	100
AzucenaRS1	ONG0900660	Chr9	5348148	5348391	mtDNA	NC_011033.1	257140..257383	-	98.77
AzucenaRS1	ONG0900660	Chr9	5348387	5348503	ptDNA	NC_001320.1	92221..92337	-	100
AzucenaRS1	ONG0900660	Chr9	5348503	5348606	mtDNA	NC_011033.1	188819..188922	-	99.04
AzucenaRS1	ONG0900660	Chr9	5348607	5348693	mtDNA	NC_011033.1	136956..137042	-	100
AzucenaRS1	ONG0900660	Chr9	5348751	5349011	mtDNA	NC_011033.1	190505..190765	+	100
AzucenaRS1	ONG0900660	Chr9	5349013	5349090	mtDNA	NC_011033.1	284289..284366	-	98.72
AzucenaRS1	ONG0900660	Chr9	5349229	5349327	mtDNA	NC_011033.1	106951..107049	-	100
AzucenaRS1	ONG0900660	Chr9	5349490	5349565	mtDNA	NC_011033.1	46675..46750	+	100
AzucenaRS1	ONG0900660	Chr9	5349566	5349700	mtDNA	NC_011033.1	76256..76390	-	100
AzucenaRS1	ONG0900660	Chr9	5349701	5349760	mtDNA	NC_011033.1	285070..285129	+	98.33
AzucenaRS1	ONG0900660	Chr9	5349873	5350015	mtDNA	NC_011033.1	326722..326864	+	99.3
AzucenaRS1	ONG0900660	Chr9	5350016	5350297	mtDNA	NC_011033.1	337360..337641	-	98.94
AzucenaRS1	ONG0900660	Chr9	5350297	5350385	mtDNA	NC_011033.1	372059..372147	+	98.88
AzucenaRS1	ONG0900660	Chr9	5350450	5350778	mtDNA	NC_011033.1	278980..279308	+	99.09
AzucenaRS1	ONG0900660	Chr9	5350781	5350833	mtDNA	NC_011033.1	77027..77079	+	98.11
AzucenaRS1	ONG0900660	Chr9	5350832	5350903	mtDNA	NC_011033.1	117727..117798	-	100
AzucenaRS1	ONG0900660	Chr9	5350904	5351165	mtDNA	NC_011033.1	265853..266114	-	98.47
AzucenaRS1	ONG0900660	Chr9	5351167	5351265	mtDNA	NC_011033.1	317051..317149	+	98.99
AzucenaRS1	ONG0900660	Chr9	5351266	5351416	mtDNA	NC_011033.1	340541..340691	-	99.34
AzucenaRS1	ONG0900660	Chr9	5351417	5351480	mtDNA	NC_011033.1	331151..331214	-	98.44
AzucenaRS1	ONG0900660	Chr9	5351523	5351581	mtDNA	NC_011033.1	301264..301322	-	100
AzucenaRS1	ONG0900660	Chr9	5351582	5351691	mtDNA	NC_011033.1	399119..399228	+	98.18
AzucenaRS1	ONG0900660	Chr9	5351691	5351828	mtDNA	NC_011033.1	283311..283448	+	99.28
AzucenaRS1	ONG0900660	Chr9	5351824	5352040	ptDNA	NC_001320.1	1088..1305	+	99.54
AzucenaRS1	ONG0900660	Chr9	5352041	5352158	mtDNA	NC_011033.1	220515..220632	-	100
AzucenaRS1	ONG0900660	Chr9	5352157	5352311	mtDNA	NC_011033.1	283762..283912	-	96.77
AzucenaRS1	ONG0900660	Chr9	5352310	5352624	mtDNA	NC_011033.1	397444..397758	+	98.73
AzucenaRS1	ONG0900660	Chr9	5352622	5352744	mtDNA	NC_011033.1	366783..366905	+	100
AzucenaRS1	ONG0900660	Chr9	5352743	5352870	ptDNA	NC_001320.1	26629..26756	-	99.22
AzucenaRS1	ONG0900660	Chr9	5352872	5353111	mtDNA	NC_011033.1	52118..52357	-	97.5
AzucenaRS1	ONG0900660	Chr9	5353110	5353182	mtDNA	NC_011033.1	153160..153232	+	98.63
AzucenaRS1	ONG0900660	Chr9	5353195	5353491	mtDNA	NC_011033.1	123393..123689	+	99.33
AzucenaRS1	ONG0900660	Chr9	5353492	5353675	mtDNA	NC_011033.1	337567..337751	-	97.84
AzucenaRS1	ONG0900660	Chr9	5353674	5354067	mtDNA	NC_011033.1	4689..5082	-	99.49
AzucenaRS1	ONG0900660	Chr9	5354068	5354117	mtDNA	NC_011033.1	417285..417334	+	100
AzucenaRS1	ONG0900660	Chr9	5354118	5354336	mtDNA	NC_011033.1	316506..316724	+	98.63
AzucenaRS1	ONG0900660	Chr9	5354336	5354439	mtDNA	NC_011033.1	475482..475585	+	100
AzucenaRS1	ONG0900660	Chr9	5354440	5354582	mtDNA	NC_011033.1	407038..407180	-	98.6
AzucenaRS1	ONG0900660	Chr9	5354582	5354854	mtDNA	NC_011033.1	70005..70277	+	99.27
AzucenaRS1	ONG0900660	Chr9	5354856	5354920	mtDNA	NC_011033.1	127590..127654	-	100
AzucenaRS1	ONG0900660	Chr9	5354919	5354993	mtDNA	NC_011033.1	139289..139363	-	100
AzucenaRS1	ONG0900660	Chr9	5354993	5355181	ptDNA	NC_001320.1	99180..99368	-	100
AzucenaRS1	ONG0900660	Chr9	5355178	5355266	mtDNA	NC_011033.1	242799..242887	-	100
AzucenaRS1	ONG0900660	Chr9	5341137	5341240	mtDNA	NC_011033.1	411375..411478	+	100
AzucenaRS1	ONG1000660	Chr10	20122650	20122702	mtDNA	NC_011033.1	251458..251510	+	100
AzucenaRS1	ONG1000670	Chr10	20653011	20653067	ptDNA	NC_001320.1	134302..134358	-	100
AzucenaRS1	ONG1000570	Chr10	3092042	3095650	mtDNA	NC_011033.1	378887..382495	-	97.92
AzucenaRS1	ONG1000680	Chr10	18109874	18109994	ptDNA	NC_001320.1	116885..117005	-	91.74
AzucenaRS1	ONG1000680	Chr10	18109994	18110118	mtDNA	NC_011033.1	384390..384514	-	96
AzucenaRS1	ONG0300990	Chr3	29830581	29830744	ptDNA	NC_001320.1	77251..77415	+	92.73
AzucenaRS1	ONG1100900	Chr11	17631045	17631115	mtDNA	NC_011033.1	173262..173331	-	95.77
AzucenaRS1	ONG0301110	Chr3	20365246	20365367	mtDNA	NC_011033.1	349124..349246	-	99.19
AzucenaRS1	ONG0301120	Chr3	20376374	20376605	ptDNA	NC_001320.1	100640..100871	-	100
AzucenaRS1	ONG0700800	Chr7	22574376	22574515	ptDNA	NC_001320.1	32064..32203	+	98.57
AzucenaRS1	ONG0101390	Chr1	719551	719750	mtDNA	NC_011033.1	418720..418919	+	99
AzucenaRS1	ONG0101400	Chr1	19230964	19231295	ptDNA	NC_001320.1	90949..91280	-	94.29
AzucenaRS1	ONG1100960	Chr11	20730327	20730380	mtDNA	NC_011033.1	398805..398858	+	98.15
AzucenaRS1	ONG0600920	Chr6	9222129	9222205	ptDNA	NC_001320.1	21339..21415	+	100
AzucenaRS1	ONG0600920	Chr6	9222252	9222339	ptDNA	NC_001320.1	6346..6433	+	100
AzucenaRS1	ONG0600920	Chr6	9222339	9222731	ptDNA	NC_001320.1	16063..16455	-	98.73
AzucenaRS1	ONG0600920	Chr6	9222733	9222943	ptDNA	NC_001320.1	62810..63020	-	99.53
AzucenaRS1	ONG0600920	Chr6	9222970	9223021	ptDNA	NC_001320.1	38221..38272	+	100
AzucenaRS1	ONG0600920	Chr6	9223022	9223092	ptDNA	NC_001320.1	36516..36585	+	97.18
AzucenaRS1	ONG0600920	Chr6	9223171	9223222	ptDNA	NC_001320.1	99143..99194	+	100
AzucenaRS1	ONG0600920	Chr6	9223255	9223322	ptDNA	NC_001320.1	54719..54786	-	98.53
AzucenaRS1	ONG0600920	Chr6	9223319	9223858	ptDNA	NC_001320.1	57608..58147	+	98.33
AzucenaRS1	ONG0600920	Chr6	9227398	9227823	ptDNA	NC_001320.1	58149..58573	+	98.83
AzucenaRS1	ONG1200930	Chr12	17566993	17567272	ptDNA	NC_001320.1	53267..53544	+	92.58
AzucenaRS1	ONG1200930	Chr12	17567328	17567422	mtDNA	NC_011033.1	467335..467429	+	93.68
AzucenaRS1	ONG0301180	Chr3	21407667	21408091	ptDNA	NC_001320.1	63655..64079	+	99.76
AzucenaRS1	ONG0500740	Chr5	17004489	17004865	mtDNA	NC_011033.1	254135..254511	+	99.47
AzucenaRS1	ONG0500740	Chr5	17004866	17005093	mtDNA	NC_011033.1	349874..350101	+	99.56
AzucenaRS1	ONG1200960	Chr12	11827969	11830192	ptDNA	NC_001320.1	91747..93966	+	99.51
AzucenaRS1	ONG0700820	Chr7	22510900	22511158	ptDNA	NC_001320.1	92487..92755	+	85.5
AzucenaRS1	ONG0700820	Chr7	22511395	22511701	ptDNA	NC_001320.1	92757..93072	+	84.47
AzucenaRS1	ONG1200970	Chr12	16551515	16551621	mtDNA	NC_011033.1	57484..57590	+	98.13
AzucenaRS1	ONG0600940	Chr6	22725945	22726014	ptDNA	NC_001320.1	102841..102910	-	95.71
AzucenaRS1	ONG0600940	Chr6	22726229	22726354	mtDNA	NC_011033.1	289460..289585	-	93.65
AzucenaRS1	ONG0600950	Chr6	22757866	22757975	ptDNA	NC_001320.1	131741..131850	+	98.18
AzucenaRS1	ONG0600950	Chr6	22757975	22758071	ptDNA	NC_001320.1	115401..115497	+	97.94
AzucenaRS1	ONG0600950	Chr6	22760272	22760361	mtDNA	NC_011033.1	311796..311884	+	98.89
AzucenaRS1	ONG0600960	Chr6	22771587	22771745	mtDNA	NC_011033.1	261166..261323	-	98.74
AzucenaRS1	ONG0301200	Chr3	11543877	11543931	mtDNA	NC_011033.1	360484..360538	-	100
AzucenaRS1	ONG0301200	Chr3	11543929	11543983	mtDNA	NC_011033.1	370015..370069	-	100
AzucenaRS1	ONG0301200	Chr3	11543985	11544608	mtDNA	NC_011033.1	202279..202903	-	99.68
AzucenaRS1	ONG0301210	Chr3	11681432	11681525	mtDNA	NC_011033.1	398479..398572	-	100
AzucenaRS1	ONG0800830	Chr8	21659197	21662586	ptDNA	NC_001320.1	108173..111556	-	97.14
AzucenaRS1	ONG0301000	Chr3	28591150	28591201	mtDNA	NC_011033.1	238395..238446	-	100
AzucenaRS1	ONG0900760	Chr9	15252425	15252503	ptDNA	NC_001320.1	124269..124347	+	94.94
AzucenaRS1	ONG1200990	Chr12	10584637	10584897	ptDNA	NC_001320.1	19420..19680	-	93.51
AzucenaRS1	ONG0301220	Chr3	16296508	16296679	mtDNA	NC_011033.1	337038..337209	-	99.42
AzucenaRS1	ONG0301220	Chr3	16296680	16297038	mtDNA	NC_011033.1	381693..382051	-	98.61
AzucenaRS1	ONG0301220	Chr3	16297040	16297313	ptDNA	NC_001320.1	58634..58907	-	100
AzucenaRS1	ONG0301220	Chr3	16297315	16297665	ptDNA	NC_001320.1	51853..52242	-	89.23
AzucenaRS1	ONG0301220	Chr3	16297665	16297840	ptDNA	NC_001320.1	87083..87258	+	99.43
AzucenaRS1	ONG1000740	Chr10	12213909	12213993	mtDNA	NC_011033.1	183310..183394	-	100
AzucenaRS1	ONG0101490	Chr1	5088003	5102336	ptDNA	NC_001320.1	109746..124064	-	99.69
AzucenaRS1	ONG1000750	Chr10	9060364	9061300	ptDNA	NC_001320.1	108462..109395	+	97.65
AzucenaRS1	ONG0401150	Chr4	15085234	15085402	ptDNA	NC_001320.1	11983..12151	-	100
AzucenaRS1	ONG0401150	Chr4	15085402	15085511	ptDNA	NC_001320.1	106526..106635	-	100
AzucenaRS1	ONG0401150	Chr4	15085511	15085700	ptDNA	NC_001320.1	20171..20360	+	100
AzucenaRS1	ONG0401150	Chr4	15085701	15085833	mtDNA	NC_011033.1	124177..124309	+	99.25
AzucenaRS1	ONG0401150	Chr4	15085832	15086010	ptDNA	NC_001320.1	128641..128819	-	100
AzucenaRS1	ONG1000800	Chr10	4567748	4571121	ptDNA	NC_001320.1	105783..109156	+	99.76
AzucenaRS1	ONG1000800	Chr10	4571155	4574316	ptDNA	NC_001320.1	123637..126797	-	99.59
AzucenaRS1	ONG1000800	Chr10	4574312	4581668	ptDNA	NC_001320.1	109615..116961	+	99.73
AzucenaRS1	ONG1000800	Chr10	4584988	4590186	ptDNA	NC_001320.1	116954..122167	+	99
AzucenaRS1	ONG0800880	Chr8	18537826	18538108	ptDNA	NC_001320.1	102156..102438	-	100
AzucenaRS1	ONG0700880	Chr7	23843377	23843486	mtDNA	NC_011033.1	299471..299580	-	99.09
AzucenaRS1	ONG1101280	Chr11	17417696	17417771	mtDNA	NC_011033.1	379457..379532	-	100
AzucenaRS1	ONG0101540	Chr1	1596426	1596476	ptDNA	NC_001320.1	9091..9141	+	100
AzucenaRS1	ONG0800900	Chr8	16298049	16298184	mtDNA	NC_011033.1	296829..296964	-	98.53
AzucenaRS1	ONG0101570	Chr1	1463452	1463817	ptDNA	NC_001320.1	34306..34671	+	100
AzucenaRS1	ONG0101230	Chr1	2603433	2604029	mtDNA	NC_011033.1	361130..361728	+	97.5
AzucenaRS1	ONG0101580	Chr1	26400322	26402202	ptDNA	NC_001320.1	110945..112824	-	99.95
AzucenaRS1	ONG0101580	Chr1	26402195	26402642	ptDNA	NC_001320.1	28672..29119	-	100
AzucenaRS1	ONG0101580	Chr1	26402642	26404371	ptDNA	NC_001320.1	86723..88457	-	99.54
AzucenaRS1	ONG0101580	Chr1	26404503	26404595	ptDNA	NC_001320.1	90913..91005	-	97.85
AzucenaRS1	ONG0101580	Chr1	26404638	26406971	ptDNA	NC_001320.1	78392..80731	+	99.62
AzucenaRS1	ONG0101580	Chr1	26406977	26407303	ptDNA	NC_001320.1	60474..60800	-	100
AzucenaRS1	ONG0101580	Chr1	26407315	26408199	ptDNA	NC_001320.1	58975..59860	+	99.55
AzucenaRS1	ONG0101580	Chr1	26408197	26410258	ptDNA	NC_001320.1	47084..49143	+	99.61
AzucenaRS1	ONG0101580	Chr1	26417970	26426408	ptDNA	NC_001320.1	76947..85395	-	99.76
AzucenaRS1	ONG0101580	Chr1	26430316	26434163	ptDNA	NC_001320.1	40002..43857	+	99.27
AzucenaRS1	ONG0101580	Chr1	26434213	26435187	ptDNA	NC_001320.1	121700..122668	+	99.28
AzucenaRS1	ONG0101580	Chr1	26393645	26400230	ptDNA	NC_001320.1	114251..120828	-	99.79
AzucenaRS1	ONG0101580	Chr1	26410315	26417970	ptDNA	NC_001320.1	90913..98568	+	99.75
AzucenaRS1	ONG0101580	Chr1	26426416	26430277	ptDNA	NC_001320.1	83371..87232	-	99.87
AzucenaRS1	ONG0101590	Chr1	3207553	3208551	ptDNA	NC_001320.1	51202..52200	-	99.1
AzucenaRS1	ONG0101600	Chr1	3404882	3404982	ptDNA	NC_001320.1	122564..122664	+	99.01
AzucenaRS1	ONG1000830	Chr10	17982685	17982794	mtDNA	NC_011033.1	321913..322023	+	98.2
[truncated: 47,220 more rows]
