# Supplementary material for: Continuous infiltration and evolutionary trajectory of nuclear organelle DNA inOryza
Source: HighWire-hosted journal article supplement (doi:10.1101/gr.279609.124), 2025-04-25
Supplement: Supplemental_Table_S3.xlsx [file Supplemental_Table_S3.xlsx]

## Sheet: Supplementary Table 3
Supplemental Table 3. Chi-square test for ONGs overlapped with genes and exons.
Accession	Variaty	Chi-square p-value
		Gene	Exon
OsN22RS2	N 22	4.00244e-07	2.46974e-25
Os127652RS1	NATEL BORO	1.15018e-07	5.97897e-31
Os117425RS1	ARC 10497	3.00158e-07	2.47929e-21
Os132278RS1	CHAO MEO	1.31681e-07	8.04456e-24
IRGSP1.0	Nipponbare	1.4924e-08	1.19592e-16
AzucenaRS1	Azucena	3.92564e-08	5.3353e-22
Os128077RS1	KETAN NANGKA	6.71409e-06	6.49213e-19
ZS97RS3	Zhenshan 97	9.10436e-14	1.72504e-30
OsIR64RS1	IR 64	1.58504e-05	4.89952e-22
Os127742RS1	PR 106	5.67553e-06	2.666e-23
Os132424RS1	GOBOL SAIL	1.13181e-06	7.42311e-22
Os125619RS1	LARHA MUGAD	0.000166195	4.99707e-17
Os127564RS1	LIMA	5.68435e-05	1.78131e-19
Os127518RS1	KHAO YAI GUANG	1.48768e-05	2.16557e-18
Os125827RS1	LIU XU	0.00985529	1.67192e-14
MH63RS3	Minghui 63	1.0076e-13	2.50219e-32
