# Supplementary material for: Continuous infiltration and evolutionary trajectory of nuclear organelle DNA inOryza
Source: HighWire-hosted journal article supplement (doi:10.1101/gr.279609.124), 2025-04-25
Supplement: Supplemental_Table_S4.xlsx [file Supplemental_Table_S4.xlsx]

## Sheet: Supplementary Table 4
Supplemental Table 4. Presence/absene variations of 754 ONGs in 3,458 accessions.
"1" means present in the accession, "0" means not present in the accession, "nocov" means no reads support the presence/absence information.
Species	Accession	K9 Group	K15 Group	ONG1000590	ONG0101270	ONG0101280	ONG0101010	ONG0900590	ONG1200830	ONG0101290	ONG0900600	ONG1000610	ONG1000620	ONG0101310	ONG1200850	ONG0101040	ONG0101320	ONG0101330	ONG0200980	ONG0301060	ONG0600850	ONG0101340	ONG0200990	ONG0900630	ONG0900640	ONG0301080	ONG0800760	ONG0900650	ONG1000630	ONG1000640	ONG0900660	ONG0301090	ONG0700740	ONG0700750	ONG0101370	ONG0101380	ONG0900670	ONG1200890	ONG0100110	ONG0400990	ONG1000660	ONG0900680	ONG1200900	ONG0301120	ONG0301140	ONG0201010	ONG0600900	ONG1000690	ONG0201020
O. sativa	B001	GJ-tmp	GJ-temp	1	0	1	1	0	1	1	1	0	0	1	1	1	0	1	1	0	1	nocov	1	0	0	0	1	1	1	1	1	1	1	0	0	0	nocov	0	1	0	0	0	1	1	0	0	1	1	1
O. sativa	B002	GJ-tmp	GJ-temp	0	0	0	1	0	1	0	1	0	0	1	0	1	nocov	0	1	1	0	nocov	1	0	0	0	1	0	0	nocov	0	1	nocov	0	0	0	nocov	0	1	0	0	0	nocov	0	0	0	1	0	0
O. sativa	B003	GJ-adm	GJ-adm	0	0	0	1	0	0	0	0	0	0	0	0	1	0	0	1	0	0	nocov	0	0	0	0	0	0	1	nocov	nocov	1	nocov	0	0	0	0	0	1	0	0	0	0	0	0	0	0	0	0
O. sativa	B004	GJ-tmp	GJ-temp	0	0	0	1	0	nocov	0	0	0	0	0	0	1	nocov	0	0	0	0	nocov	0	0	0	0	0	0	0	nocov	nocov	0	nocov	0	0	0	nocov	0	1	0	0	0	nocov	0	0	0	0	0	0
O. sativa	B005	GJ-tmp	GJ-temp	0	0	0	1	0	nocov	0	0	0	0	0	0	1	nocov	0	0	0	0	nocov	0	0	0	0	0	0	0	nocov	0	1	0	nocov	0	0	nocov	0	1	0	0	0	0	0	0	0	0	0	0
O. sativa	B006	XI-adm	XI-3B2	1	1	1	0	1	1	1	1	1	1	1	1	1	nocov	1	1	0	1	1	1	1	1	1	1	1	1	1	1	1	1	0	1	1	1	1	0	1	0	1	nocov	1	1	1	1	1	1
O. sativa	B007	XI-adm	XI-3B2	1	1	1	0	1	1	1	1	1	1	1	1	1	1	1	1	1	1	1	1	1	1	1	1	1	1	1	1	1	1	1	1	0	1	1	0	1	1	1	nocov	1	1	1	1	1	1
O. sativa	B008	GJ-tmp	GJ-temp	0	0	0	1	0	nocov	0	0	0	0	0	0	1	0	0	0	0	0	nocov	0	0	0	0	0	0	0	nocov	nocov	0	nocov	0	0	0	nocov	0	1	0	nocov	0	nocov	0	0	0	0	0	0
O. sativa	B009	XI-1A	XI-1A	1	1	1	0	1	1	1	1	1	1	1	1	1	1	1	1	1	1	1	1	1	0	1	1	1	1	nocov	1	1	1	1	1	1	1	1	0	0	1	1	0	1	1	1	1	1	1
O. sativa	B010	XI-1A	XI-1A	1	1	1	0	1	1	1	1	1	1	1	1	1	1	1	1	1	1	1	1	1	1	1	1	1	1	1	1	1	1	1	1	1	1	1	0	0	1	1	nocov	1	1	1	1	0	1
O. sativa	B011	XI-adm	XI-adm	1	1	1	0	1	1	1	1	1	1	1	1	1	1	1	1	1	1	1	0	1	1	1	1	1	1	1	1	1	1	1	0	0	1	0	0	0	0	1	1	1	1	1	1	1	1
O. sativa	B012	XI-2	XI-2B	1	1	1	0	1	1	1	1	0	1	1	1	1	1	1	1	1	1	1	1	1	1	1	1	1	1	1	1	1	1	1	nocov	1	1	1	1	1	1	0	nocov	1	1	1	1	1	1
O. sativa	B013	XI-adm	XI-adm	1	1	1	0	1	1	1	1	1	0	1	1	1	nocov	1	1	1	1	1	1	1	1	0	1	1	1	1	1	1	1	0	1	1	1	1	1	1	0	1	1	1	nocov	1	1	1	1
O. sativa	B014	GJ-tmp	GJ-temp	0	0	0	1	1	nocov	1	0	1	1	0	0	1	0	1	1	0	0	1	0	1	0	0	1	0	1	nocov	1	1	1	0	0	0	nocov	1	1	1	0	0	1	0	nocov	1	0	0	1
O. sativa	B015	XI-1A	XI-1A	1	1	1	0	1	1	1	1	1	1	1	1	1	1	1	1	1	1	1	1	1	1	1	1	1	1	1	1	1	1	1	1	1	1	1	0	0	1	1	1	1	1	1	1	0	1
O. sativa	B016	GJ-tmp	GJ-temp	0	0	0	1	0	nocov	0	0	0	0	0	0	1	nocov	0	0	0	0	nocov	0	0	0	0	0	0	0	nocov	nocov	1	nocov	0	0	0	nocov	0	1	0	0	0	nocov	0	0	0	0	0	0
O. sativa	B017	GJ-tmp	GJ-temp	0	0	0	1	0	nocov	0	0	0	0	0	0	1	0	0	1	0	0	nocov	0	0	0	0	0	0	0	nocov	nocov	1	nocov	0	0	0	nocov	0	1	0	0	0	0	0	0	0	0	0	0
O. sativa	B018	GJ-trp	GJ-trop1	0	0	0	1	0	nocov	0	0	0	1	0	0	1	0	0	0	0	0	nocov	0	0	0	0	0	0	1	nocov	1	1	nocov	0	0	0	nocov	0	1	0	0	0	nocov	1	0	1	0	0	0
O. sativa	B019	XI-adm	XI-adm	1	1	1	1	1	1	1	1	1	1	1	1	1	1	1	1	1	1	1	1	1	1	1	1	1	1	1	1	1	1	1	1	1	1	1	0	1	0	1	1	1	1	1	1	1	1
O. sativa	B020	admix	admix	1	0	1	1	1	1	0	0	1	1	1	0	1	nocov	0	1	0	1	nocov	1	0	1	0	1	1	1	1	1	1	nocov	1	0	1	nocov	0	1	0	0	0	nocov	nocov	0	1	1	1	1
O. sativa	B021	XI-adm	XI-3B2	1	0	1	0	1	1	1	1	1	1	1	1	1	1	1	1	0	1	1	1	1	1	1	1	1	1	1	1	1	1	1	1	1	1	1	0	1	0	1	1	0	1	1	1	1	0
O. sativa	B023	GJ-tmp	GJ-temp	0	0	1	1	1	1	1	0	1	0	1	0	1	0	1	1	0	1	1	0	0	1	nocov	1	0	1	nocov	1	1	1	0	0	1	1	1	1	0	1	1	nocov	nocov	0	1	1	0	1
O. sativa	B024	XI-1A	XI-1A	1	1	1	0	1	1	1	1	0	1	1	1	1	nocov	1	1	1	1	1	1	1	1	1	1	1	1	1	1	1	1	1	0	1	1	1	0	0	1	1	1	1	1	1	1	1	1
O. sativa	B025	GJ-trp	GJ-trop1	nocov	1	0	1	0	nocov	0	0	0	1	0	0	1	0	0	0	0	0	nocov	0	0	0	nocov	0	0	1	nocov	1	0	nocov	0	0	0	nocov	0	1	0	0	0	nocov	0	0	0	0	0	0
O. sativa	B026	XI-adm	XI-adm	1	1	1	0	1	1	1	1	1	1	1	1	1	1	1	1	1	1	1	0	1	1	1	1	1	1	1	1	1	1	1	0	0	1	0	0	0	0	1	1	1	1	1	1	1	1
O. sativa	B027	XI-3	XI-3A	1	1	1	1	1	1	0	1	1	1	1	0	1	1	1	1	0	1	nocov	1	1	1	1	1	0	1	1	1	1	1	1	1	1	nocov	1	0	0	0	1	1	1	0	1	1	1	1
O. sativa	B028	XI-adm	XI-1	1	1	1	1	1	1	1	1	1	1	1	1	1	nocov	1	1	1	1	1	1	1	1	1	1	1	1	1	1	1	1	1	1	1	1	1	0	1	1	1	1	0	1	1	1	1	1
O. sativa	B029	XI-1B	XI-1B1	1	1	1	1	1	1	1	1	1	0	1	1	1	nocov	1	1	1	1	1	1	1	1	1	0	1	1	nocov	1	1	1	1	1	1	1	1	1	1	nocov	1	1	1	1	1	1	1	1
O. sativa	B030	XI-adm	XI-2A	1	1	1	0	1	1	1	1	1	1	1	1	1	1	1	1	1	1	1	1	1	1	1	1	1	1	1	1	1	1	1	1	1	1	1	0	1	1	1	1	1	1	1	1	1	1
O. sativa	B031	XI-2	XI-2	1	0	1	0	1	1	1	1	1	1	1	1	1	nocov	1	1	1	1	1	1	1	1	1	1	1	1	nocov	1	1	1	1	1	1	1	1	0	1	1	1	1	1	1	1	1	1	1
O. sativa	B032	XI-1B	XI-1B	1	1	1	0	1	1	1	1	1	0	1	1	1	nocov	1	1	1	1	1	1	1	1	1	1	1	1	1	1	1	1	1	1	1	1	0	0	1	0	1	1	1	1	1	1	1	1
O. sativa	B033	XI-1B	XI-1B	1	1	1	0	1	1	1	1	1	1	1	1	1	nocov	1	1	1	1	1	1	1	1	1	1	1	1	1	1	1	1	1	1	1	nocov	1	0	1	0	1	nocov	0	1	1	1	1	1
O. sativa	B034	GJ-tmp	GJ-temp	0	0	0	1	0	0	0	0	0	0	0	0	1	nocov	0	0	0	0	nocov	0	0	0	0	0	0	0	nocov	0	0	nocov	0	0	0	nocov	0	1	0	0	0	0	0	0	0	0	0	0
O. sativa	B035	XI-adm	XI-1B	1	1	1	0	1	1	1	1	1	0	1	1	1	1	1	1	1	1	1	1	1	1	1	1	1	1	1	1	1	1	1	1	1	1	1	0	1	0	0	1	1	1	1	1	0	0
O. sativa	B036	GJ-adm	GJ-trop	0	0	0	1	0	0	0	0	0	0	0	0	1	nocov	0	0	0	0	nocov	0	0	0	0	0	0	1	nocov	nocov	0	nocov	0	0	0	0	0	1	0	0	0	nocov	0	0	0	0	0	0
O. sativa	B037	GJ-trp	GJ-trop1	0	0	0	1	0	nocov	0	0	1	1	0	1	1	nocov	1	0	0	0	nocov	1	1	1	nocov	0	0	1	nocov	1	0	nocov	nocov	0	0	nocov	0	1	0	0	0	nocov	1	0	0	nocov	0	1
O. sativa	B038	GJ-tmp	GJ-temp	0	0	1	1	0	nocov	1	1	0	0	0	0	1	0	0	0	0	0	nocov	0	0	0	0	0	0	0	nocov	0	0	nocov	0	0	0	nocov	0	1	0	0	0	1	0	0	1	0	0	0
O. sativa	B039	XI-adm	XI-1	1	1	1	1	1	1	1	1	1	1	1	1	1	1	1	1	1	1	1	1	1	1	1	1	1	1	1	1	1	1	1	1	1	1	1	1	1	0	1	1	1	1	1	1	1	1
O. sativa	B040	XI-adm	XI-1	1	1	1	0	1	1	1	1	1	1	1	1	1	1	1	1	1	1	1	1	1	1	1	1	1	1	1	1	1	1	1	1	1	1	1	0	0	1	0	1	1	nocov	1	1	0	1
O. sativa	B043	GJ-trp	GJ-trop1	0	0	1	1	0	1	0	0	0	1	0	0	1	0	0	0	0	0	nocov	0	0	0	0	1	0	0	nocov	1	1	nocov	0	0	0	nocov	0	1	0	nocov	0	0	0	0	0	0	0	0
O. sativa	B044	XI-adm	XI-3B2	nocov	1	0	0	1	1	1	nocov	1	1	1	1	1	nocov	1	1	1	1	1	1	0	1	1	1	1	1	nocov	1	1	nocov	1	nocov	1	nocov	0	0	1	nocov	0	1	1	1	1	1	0	1
O. sativa	B045	GJ-tmp	GJ-temp	0	0	0	1	0	nocov	0	0	0	0	0	0	1	nocov	0	0	0	0	nocov	0	0	0	0	0	0	0	nocov	nocov	1	nocov	0	0	0	nocov	0	1	0	0	0	nocov	0	0	0	0	0	0
O. sativa	B046	GJ-tmp	GJ-temp	0	0	0	1	0	nocov	0	0	0	0	0	0	1	nocov	0	0	0	0	nocov	1	0	0	0	0	0	0	nocov	nocov	1	nocov	0	0	0	nocov	0	1	0	0	0	0	0	0	0	0	1	0
O. sativa	B047	GJ-tmp	GJ-temp	0	0	0	1	1	1	1	1	1	1	1	0	1	nocov	1	1	1	1	1	1	1	1	0	1	1	1	nocov	1	1	nocov	1	1	1	1	1	1	0	0	0	1	1	1	1	1	1	1
O. sativa	B048	XI-1B	XI-1B	1	1	1	nocov	1	1	1	1	1	1	1	1	1	nocov	0	1	1	1	1	1	1	1	1	1	1	1	1	1	1	1	1	1	1	1	1	0	1	0	1	1	0	1	1	1	1	1
O. sativa	B049	cA(Aus)	cA1	1	1	1	0	1	1	1	1	1	0	0	nocov	1	1	1	1	1	1	1	1	1	0	nocov	1	1	0	1	1	0	nocov	0	0	0	1	0	0	nocov	0	1	nocov	1	1	1	1	1	0
O. sativa	B051	XI-adm	XI-1	1	1	0	0	1	1	1	1	1	1	0	1	1	nocov	1	1	0	1	1	1	1	1	1	1	1	1	1	1	1	1	1	1	1	1	1	0	1	0	1	1	1	nocov	1	1	1	1
O. sativa	B052	XI-2	XI-2B	1	1	1	0	1	1	1	1	1	1	1	1	1	1	1	1	1	1	1	1	1	1	1	1	1	1	1	1	1	0	1	0	0	nocov	0	0	nocov	1	1	nocov	0	1	1	1	1	1
O. sativa	B053	GJ-trp	GJ-trop1	0	0	0	1	0	1	0	0	1	1	0	0	1	0	1	1	0	1	1	1	0	0	0	0	0	1	nocov	1	1	1	0	1	0	nocov	1	1	0	0	0	nocov	1	0	0	1	0	1
O. sativa	B054	GJ-trp	GJ-trop1	0	0	0	1	0	nocov	0	0	0	1	0	0	1	nocov	0	0	0	0	nocov	0	0	0	0	0	0	1	nocov	1	0	nocov	0	0	0	nocov	0	1	0	0	0	nocov	1	0	0	0	0	0
O. sativa	B055	GJ-tmp	GJ-temp	0	0	1	1	0	nocov	1	0	0	1	0	0	1	nocov	1	1	0	1	nocov	0	1	0	0	1	0	1	nocov	1	0	nocov	0	0	0	nocov	0	1	0	1	0	nocov	0	0	0	0	0	0
O. sativa	B056	GJ-tmp	GJ-temp	0	0	0	1	0	nocov	0	0	0	0	1	0	1	nocov	0	0	0	0	nocov	0	0	0	0	0	0	0	nocov	nocov	1	nocov	0	0	0	0	0	1	0	0	0	nocov	0	0	0	0	0	0
O. sativa	B057	GJ-tmp	GJ-temp	0	0	0	1	0	nocov	nocov	0	0	0	0	0	1	nocov	0	0	0	0	nocov	0	0	0	0	0	0	0	nocov	nocov	0	nocov	0	0	0	nocov	1	1	0	0	1	nocov	0	0	0	0	0	0
O. sativa	B058	XI-1B	XI-1B	1	1	1	0	1	1	1	1	1	1	1	1	1	nocov	1	1	1	1	1	1	1	1	1	1	1	1	1	1	1	1	1	1	1	1	1	0	1	0	1	nocov	0	1	1	1	1	1
O. sativa	B059	XI-1A	XI-1A	1	1	1	0	1	1	1	1	1	1	1	1	1	1	1	1	1	1	1	1	1	1	1	1	1	1	1	1	1	1	0	1	1	1	1	0	0	1	1	1	1	1	1	1	0	1
O. sativa	B060	XI-1A	XI-1A	1	1	1	0	1	1	1	1	1	1	1	1	1	nocov	1	1	1	1	1	1	1	1	1	1	1	1	1	1	1	1	1	1	1	1	1	0	0	1	1	1	1	1	1	1	1	1
O. sativa	B061	XI-1A	XI-1A	1	1	1	0	1	1	1	1	1	1	1	1	1	nocov	1	1	1	1	1	1	1	1	1	1	1	1	1	1	1	1	1	1	1	1	1	0	0	1	1	1	1	1	1	1	0	1
O. sativa	B062	XI-1A	XI-1A	1	1	1	0	1	1	1	1	1	1	1	1	1	nocov	1	1	1	1	1	1	1	1	1	1	1	1	1	1	1	1	1	0	1	1	1	0	0	1	1	1	1	1	1	1	1	1
O. sativa	B063	XI-1A	XI-1	1	1	1	0	1	1	1	1	1	1	1	1	1	nocov	1	1	1	1	1	1	1	1	nocov	1	1	1	1	1	1	1	0	1	1	1	1	0	0	1	1	1	1	1	1	1	1	1
O. sativa	B064	XI-adm	XI-1	1	1	1	0	1	1	1	1	1	0	1	1	1	nocov	1	1	1	1	1	1	1	1	1	1	1	1	1	1	1	1	1	1	1	1	1	0	0	0	1	nocov	1	1	1	1	1	1
O. sativa	B065	XI-adm	XI-1	1	1	1	0	1	1	1	1	1	1	1	1	1	nocov	1	1	1	1	1	1	1	1	1	1	1	1	1	1	1	1	1	1	1	1	1	0	0	0	1	1	1	1	1	1	1	1
O. sativa	B066	GJ-tmp	GJ-temp	0	0	0	1	0	nocov	0	0	0	0	0	0	nocov	nocov	0	1	1	0	nocov	0	0	0	0	0	0	0	nocov	nocov	1	nocov	0	0	0	nocov	0	1	0	0	1	nocov	0	0	0	0	0	0
O. sativa	B067	XI-1A	XI-1A	1	1	1	0	1	1	1	1	1	1	1	1	1	nocov	1	1	1	1	1	1	1	1	1	1	1	1	1	1	1	1	1	1	1	1	1	0	0	1	1	1	1	1	1	1	0	1
O. sativa	B068	GJ-tmp	GJ-temp	0	0	0	1	0	nocov	0	0	0	0	0	0	1	nocov	0	1	0	0	nocov	0	0	0	nocov	0	0	0	nocov	nocov	1	0	0	0	0	nocov	0	1	0	0	0	nocov	0	0	0	0	0	0
O. sativa	B069	GJ-adm	GJ-adm	0	0	0	1	0	nocov	0	0	0	0	0	0	1	0	1	1	0	0	nocov	0	0	0	0	0	0	1	nocov	nocov	1	1	0	0	0	0	0	1	0	0	0	nocov	0	nocov	0	0	0	0
O. sativa	B070	GJ-adm	GJ-adm	0	0	0	1	0	nocov	0	0	0	0	0	0	1	0	0	0	0	0	nocov	0	0	0	0	0	0	1	nocov	nocov	1	nocov	0	0	0	0	0	1	0	0	0	nocov	0	0	0	0	0	0
O. sativa	B071	GJ-tmp	GJ-temp	0	0	0	1	0	nocov	0	0	0	0	0	0	1	nocov	0	0	0	0	nocov	0	0	0	0	0	1	1	nocov	nocov	1	nocov	0	0	0	nocov	0	1	0	0	0	nocov	nocov	0	0	0	0	0
O. sativa	B072	XI-1A	XI-1A	1	0	1	0	1	1	1	1	1	1	1	1	1	nocov	1	1	1	1	1	1	1	1	1	1	1	1	1	1	1	1	1	0	1	1	1	1	0	1	1	1	1	1	1	1	1	1
O. sativa	B073	XI-adm	XI-3B2	1	1	1	0	1	1	1	1	1	1	1	1	1	1	1	1	0	1	1	1	1	1	1	1	1	1	1	1	1	1	0	1	0	1	1	0	1	1	1	1	1	1	1	1	1	1
O. sativa	B074	XI-1A	XI-1A	1	1	1	0	1	1	1	1	1	0	1	1	1	1	1	1	1	1	1	1	1	1	1	1	1	1	1	1	1	1	1	1	1	1	1	0	0	0	1	1	1	1	1	1	0	1
O. sativa	B075	XI-adm	XI-3B2	1	1	1	0	1	1	1	1	1	1	1	1	1	nocov	1	1	1	1	1	1	1	1	1	1	1	1	1	1	1	1	1	1	1	1	1	0	1	1	1	1	1	1	1	1	1	1
O. sativa	B076	XI-adm	XI-3B2	1	1	1	0	1	1	1	1	1	1	1	1	1	1	1	1	1	1	1	1	1	1	1	1	1	1	1	1	1	1	1	1	1	1	1	0	1	0	1	1	1	nocov	1	1	1	1
O. sativa	B077	GJ-tmp	GJ-temp	nocov	0	0	1	0	nocov	0	0	0	0	0	0	1	0	0	1	0	0	nocov	0	0	0	0	1	0	1	nocov	1	1	nocov	1	0	0	nocov	0	1	0	0	0	nocov	0	0	0	0	0	0
O. sativa	B079	XI-1A	XI-1A	1	0	1	0	1	1	1	1	1	1	1	1	1	1	1	1	1	1	1	1	1	1	1	1	1	1	1	1	1	1	1	1	1	1	0	0	0	0	1	1	1	1	1	1	1	1
O. sativa	B081	XI-1A	XI-1	1	1	1	0	1	1	1	1	1	1	1	1	1	1	1	1	1	1	1	1	1	1	1	1	1	1	1	1	1	1	1	0	1	1	1	0	1	1	1	nocov	1	1	1	1	1	1
O. sativa	B082	XI-adm	XI-3B2	1	1	1	0	1	1	1	1	1	1	1	1	1	nocov	1	1	1	1	1	1	1	1	1	1	1	1	1	1	1	1	0	1	1	1	1	0	1	1	1	1	1	nocov	1	0	1	1
O. sativa	B083	XI-1A	XI-1A	1	1	1	0	1	1	1	1	1	1	1	1	1	nocov	1	1	1	1	1	1	1	1	1	1	1	1	1	1	1	1	1	1	1	1	1	0	1	1	1	1	1	1	1	1	1	1
O. sativa	B084	admix	admix	0	0	0	1	0	nocov	0	1	0	0	0	1	1	1	0	0	0	1	nocov	0	1	1	0	0	1	0	nocov	1	0	nocov	1	0	0	1	0	0	0	0	1	nocov	0	0	0	1	0	0
O. sativa	B085	XI-1A	XI-1A	1	1	1	0	1	1	1	1	1	1	1	1	1	nocov	1	1	1	1	1	1	1	1	0	1	1	1	1	1	1	1	0	1	1	1	1	0	0	1	1	1	1	1	1	1	1	1
O. sativa	B086	admix	admix	0	0	1	1	1	1	0	1	0	0	0	1	nocov	0	0	0	0	1	nocov	0	1	0	0	1	0	0	nocov	1	0	nocov	0	0	0	1	0	1	0	0	1	nocov	1	0	1	1	0	1
O. sativa	B087	XI-2	XI-2A	1	1	1	0	1	1	1	1	1	1	1	1	1	1	1	1	1	1	1	1	1	1	1	1	1	1	nocov	1	1	1	1	1	1	1	1	1	1	1	1	1	0	nocov	1	1	1	1
O. sativa	B088	XI-adm	XI-1B	1	1	1	0	1	1	1	1	1	0	1	1	1	nocov	1	1	1	1	1	1	1	1	1	1	1	1	1	1	1	1	1	1	1	1	1	0	1	0	0	1	1	1	1	1	0	0
O. sativa	B089	XI-adm	XI-adm	1	1	1	0	1	1	1	1	1	1	1	1	1	1	1	1	1	1	1	1	1	1	1	1	1	1	1	1	1	1	1	1	1	nocov	1	0	0	1	1	nocov	1	1	1	1	1	1
O. sativa	B090	XI-adm	XI-adm	1	0	1	0	1	1	1	1	1	1	1	1	1	1	1	1	0	1	1	1	1	1	1	1	0	1	1	1	1	1	1	1	0	1	1	0	0	1	1	1	0	1	1	1	1	1
O. sativa	B091	XI-adm	XI-adm	1	1	1	0	1	1	1	1	0	1	1	1	1	nocov	1	1	1	1	1	1	1	1	1	1	1	0	1	1	1	1	0	0	0	1	0	0	0	1	1	nocov	1	1	1	1	1	1
O. sativa	B092	XI-1A	XI-1A	1	1	1	0	1	1	1	1	1	1	1	1	1	1	1	1	1	1	1	1	1	1	1	1	1	1	1	1	1	1	0	1	1	1	1	0	0	1	1	1	1	1	1	1	1	1
O. sativa	B093	XI-1A	XI-1	1	1	1	0	1	1	1	1	0	1	1	1	1	nocov	1	1	0	1	1	1	1	1	0	1	1	1	1	1	1	1	0	1	0	1	0	0	0	1	1	nocov	1	nocov	0	1	1	1
O. sativa	B094	XI-1A	XI-1A	1	1	1	0	1	1	1	1	1	1	1	1	1	nocov	1	1	1	1	1	1	1	1	1	1	1	1	1	1	1	1	1	1	1	1	1	0	1	1	1	1	1	1	1	1	1	1
O. sativa	B095	XI-adm	XI-3B2	1	1	1	0	1	1	1	1	1	1	1	1	1	nocov	1	1	1	1	1	1	1	1	1	1	1	1	1	1	1	1	1	1	1	1	1	0	1	1	1	nocov	1	1	1	0	1	1
O. sativa	B096	XI-adm	XI-adm	1	1	1	0	1	1	1	1	1	1	1	1	1	1	1	1	1	1	1	1	1	1	1	1	1	1	1	1	1	1	1	1	1	1	1	0	0	1	1	nocov	1	1	1	1	1	1
O. sativa	B097	XI-adm	XI-adm	1	1	1	0	1	1	1	1	1	1	1	1	1	1	1	1	1	1	1	1	1	1	0	1	1	1	1	1	1	1	1	1	1	1	1	0	1	1	1	1	1	1	1	1	1	1
O. sativa	B100	GJ-tmp	GJ-temp	0	0	0	1	0	nocov	0	0	0	0	0	0	nocov	0	0	0	0	0	nocov	0	0	0	0	0	0	0	nocov	nocov	0	nocov	0	0	0	0	0	1	0	0	0	nocov	0	0	0	0	0	0
O. sativa	B101	GJ-tmp	GJ-temp	0	0	0	1	1	nocov	0	1	0	0	0	1	nocov	nocov	1	1	1	1	1	1	1	0	0	1	0	0	nocov	nocov	1	nocov	0	1	0	1	1	1	0	0	1	nocov	0	0	0	1	1	1
O. sativa	B102	GJ-tmp	GJ-temp	0	0	0	1	0	nocov	1	1	0	0	0	0	1	nocov	0	0	0	0	nocov	0	0	0	nocov	0	0	0	nocov	nocov	0	nocov	0	0	0	1	0	1	0	0	0	0	0	nocov	0	0	0	0
O. sativa	B103	GJ-tmp	GJ-temp	0	0	1	1	0	nocov	1	1	0	1	0	0	nocov	0	0	0	0	0	nocov	0	0	1	0	0	0	1	1	1	1	nocov	0	0	0	0	0	1	0	1	0	nocov	0	0	0	0	0	1
O. sativa	B104	XI-1A	XI-1A	1	1	1	0	1	1	1	1	1	1	1	1	1	1	1	1	1	1	1	1	1	1	1	1	1	1	1	1	1	1	1	1	1	1	1	0	0	0	1	1	1	1	1	1	1	1
O. sativa	B105	XI-adm	XI-3B2	1	1	1	0	1	1	1	1	1	1	1	1	1	1	0	1	0	1	1	0	1	1	0	1	1	1	1	1	1	nocov	1	1	1	nocov	1	0	1	1	1	1	1	0	1	1	1	1
O. sativa	B106	XI-adm	XI-adm	1	1	1	0	1	1	1	1	1	1	1	1	1	1	1	1	1	1	1	1	1	1	1	1	1	1	1	1	1	1	1	1	0	nocov	1	0	1	1	1	nocov	1	nocov	1	1	1	1
O. sativa	B107	XI-adm	XI-3B	1	1	1	0	1	1	1	1	1	1	1	1	1	1	1	1	1	1	1	1	1	1	1	1	1	1	1	1	1	1	1	1	1	nocov	1	0	1	1	1	nocov	1	1	1	1	1	1
O. sativa	B108	XI-adm	XI-adm	1	1	1	0	1	1	1	1	1	1	1	1	1	1	1	1	0	1	1	1	1	1	1	1	1	0	1	1	1	1	0	0	0	1	0	0	1	1	1	nocov	1	1	0	1	1	1
O. sativa	B109	GJ-adm	GJ-adm	0	0	0	1	0	nocov	0	0	0	0	0	0	1	0	0	0	0	0	nocov	0	0	0	0	0	0	0	nocov	0	0	nocov	0	0	0	nocov	0	1	0	0	0	nocov	0	0	0	0	0	0
O. sativa	B110	GJ-tmp	GJ-temp	0	0	0	1	0	nocov	0	0	0	0	0	0	nocov	nocov	0	0	0	0	1	1	0	0	0	1	0	0	nocov	1	0	nocov	0	0	0	nocov	1	1	0	0	0	nocov	0	0	0	0	0	0
O. sativa	B111	GJ-tmp	GJ-temp	0	0	0	1	0	nocov	0	0	1	0	0	0	nocov	nocov	0	0	0	0	nocov	0	0	1	0	0	0	0	0	nocov	0	nocov	0	0	1	1	1	1	0	0	0	nocov	0	0	0	0	0	0
O. sativa	B112	XI-1A	XI-1A	1	1	1	0	1	1	1	1	1	1	1	1	1	nocov	1	1	1	1	1	1	1	1	1	1	1	1	1	1	1	1	0	1	1	1	1	0	0	1	1	1	1	1	1	1	1	1
O. sativa	B113	XI-adm	XI-3B2	1	1	1	0	1	1	1	1	1	1	1	1	1	nocov	1	1	1	1	1	1	1	1	1	1	1	1	1	1	1	1	0	1	1	1	1	0	1	1	1	1	1	1	1	1	1	1
O. sativa	B114	XI-1A	XI-1A	1	1	1	0	1	1	1	1	1	1	1	1	1	nocov	1	1	1	1	1	1	1	1	1	1	1	1	1	1	1	1	0	1	1	1	1	0	0	1	1	1	1	1	1	1	1	1
O. sativa	B115	XI-1A	XI-1A	1	1	1	0	1	1	1	1	1	1	1	1	1	1	1	1	1	1	1	1	1	1	1	1	1	1	1	1	1	1	0	1	1	nocov	1	0	0	1	1	1	0	1	1	1	1	1
O. sativa	B116	XI-adm	XI-adm	1	1	1	0	1	nocov	1	1	1	1	1	1	1	nocov	1	1	1	1	1	1	1	1	1	1	1	1	1	1	1	1	1	1	1	1	1	0	0	1	1	nocov	1	1	1	1	0	1
O. sativa	B117	GJ-tmp	GJ-temp	nocov	0	0	1	0	nocov	1	0	0	0	0	nocov	1	nocov	0	0	0	0	nocov	0	0	0	nocov	0	0	0	nocov	nocov	0	nocov	0	0	1	nocov	0	1	0	nocov	1	nocov	0	nocov	nocov	0	0	0
O. sativa	B118	XI-adm	XI-3B2	1	1	1	0	1	1	1	1	1	1	1	1	1	nocov	1	1	0	1	1	0	1	1	1	1	1	1	1	1	1	nocov	1	1	1	nocov	1	0	1	0	1	1	1	1	1	1	1	1
O. sativa	B119	XI-1A	XI-1A	1	1	1	0	1	1	1	1	1	1	1	1	1	nocov	1	1	1	1	1	1	1	1	1	1	1	1	1	1	1	1	1	1	1	1	1	0	0	1	1	1	1	1	1	1	1	1
O. sativa	B120	XI-adm	XI-3B2	1	nocov	1	0	1	1	1	1	1	1	1	1	1	nocov	1	1	1	1	1	1	1	1	1	1	1	1	1	1	1	1	1	1	1	1	1	0	1	0	1	1	1	1	1	1	1	1
O. sativa	B121	XI-1A	XI-1A	1	1	1	0	1	1	1	1	1	1	1	1	1	1	1	1	1	1	1	1	1	1	1	1	1	1	1	1	1	1	0	1	1	1	1	0	0	1	1	1	1	1	1	1	1	1
O. sativa	B122	GJ-tmp	GJ-temp	0	0	0	1	0	nocov	0	0	0	0	0	0	1	nocov	0	0	0	0	nocov	0	0	0	0	0	0	0	nocov	nocov	1	nocov	0	0	0	0	0	1	0	0	0	nocov	0	nocov	1	0	0	0
O. sativa	B123	XI-adm	XI-adm	1	1	1	0	1	1	1	1	1	1	1	1	1	nocov	1	1	0	1	1	1	1	1	1	1	1	1	1	1	1	1	1	1	1	1	1	0	1	1	1	1	0	nocov	1	1	1	1
O. sativa	B124	GJ-tmp	GJ-temp	0	nocov	1	1	1	1	0	1	1	1	0	1	1	nocov	1	1	1	1	1	1	1	0	0	1	1	1	nocov	1	1	1	1	1	1	nocov	1	1	0	1	0	1	1	0	1	1	1	1
O. sativa	B125	XI-adm	XI-1	1	1	1	0	1	1	1	1	1	1	1	1	1	nocov	1	1	1	1	1	1	1	1	1	1	1	1	1	1	1	1	1	1	1	1	1	1	1	1	1	1	1	nocov	1	1	1	1
O. sativa	B126	XI-1A	XI-1A	1	1	1	0	1	1	1	1	1	0	1	1	1	nocov	1	1	1	1	1	1	1	1	1	1	1	1	1	1	1	1	1	1	1	nocov	1	0	0	0	1	1	1	1	1	1	0	1
O. sativa	B127	XI-1A	XI-1A	1	1	1	0	1	1	1	1	1	0	1	1	1	nocov	1	1	1	1	1	1	1	1	1	1	1	1	1	1	1	1	1	1	1	1	1	0	0	nocov	1	1	1	1	1	1	0	1
O. sativa	B128	XI-adm	XI-1	1	1	1	0	1	1	1	1	1	1	1	1	1	nocov	1	1	1	1	1	0	1	1	1	0	1	1	1	1	1	1	0	1	1	nocov	1	0	1	1	1	0	1	1	1	1	1	1
O. sativa	B129	XI-adm	XI-3B	1	1	1	0	1	1	1	1	1	1	1	1	1	nocov	1	1	1	1	1	1	1	1	1	1	1	1	1	1	1	1	0	1	0	1	1	0	1	0	1	1	1	1	1	1	1	1
O. sativa	B130	XI-1A	XI-1A	1	1	1	0	1	1	1	1	1	1	1	1	1	1	1	1	1	1	1	1	1	1	1	1	1	1	1	1	1	1	1	1	0	1	1	1	1	1	1	1	1	1	1	1	1	1
O. sativa	B131	XI-adm	XI-3B2	1	0	1	0	1	1	1	1	1	1	1	1	1	nocov	1	1	1	0	1	1	1	1	1	1	1	1	1	1	1	1	0	0	1	1	0	0	1	1	1	1	0	nocov	1	1	1	1
O. sativa	B132	XI-adm	XI-3B2	1	0	1	0	1	1	1	1	1	1	1	1	1	nocov	1	1	1	0	1	1	1	1	1	1	1	1	1	1	1	1	0	0	1	1	0	1	1	1	1	1	nocov	nocov	1	1	1	1
O. sativa	B133	XI-adm	XI-3B2	1	1	1	0	1	1	1	1	1	1	1	1	1	1	0	1	0	1	1	1	1	1	nocov	1	1	1	1	1	1	1	1	1	1	nocov	nocov	0	0	1	1	1	1	nocov	1	1	1	1
O. sativa	B134	GJ-sbtrp	GJ-subtrp	0	nocov	0	1	0	nocov	0	0	0	0	0	0	1	nocov	0	0	0	0	nocov	0	0	0	0	0	0	0	nocov	1	0	nocov	0	0	1	nocov	0	1	0	0	1	0	0	nocov	0	0	0	0
O. sativa	B135	XI-adm	XI-3B2	1	1	1	0	1	1	1	1	1	1	1	1	1	nocov	1	1	0	1	1	1	1	1	1	1	1	1	1	1	1	1	0	1	1	nocov	1	0	1	0	1	1	1	1	1	1	1	1
O. sativa	B136	GJ-adm	GJ-adm	0	0	0	1	0	nocov	0	0	0	0	0	0	nocov	0	0	1	0	0	nocov	0	0	0	0	0	0	0	nocov	nocov	0	nocov	0	0	0	nocov	0	1	0	0	0	nocov	0	0	0	0	0	0
O. sativa	B137	XI-adm	XI-1	1	1	1	0	1	1	1	0	1	1	1	1	1	nocov	1	1	1	1	1	1	1	1	nocov	1	1	1	1	1	1	1	1	1	1	1	1	0	0	0	nocov	1	1	1	1	1	1	1
O. sativa	B138	XI-adm	XI-adm	nocov	1	1	0	1	1	1	1	1	1	1	1	1	nocov	1	1	1	1	1	1	1	1	1	1	1	1	nocov	1	1	1	1	1	1	1	1	0	0	1	1	1	1	1	1	1	0	1
O. sativa	B139	XI-adm	XI-1	1	1	1	0	1	1	1	1	1	1	1	1	1	nocov	1	1	1	1	1	1	1	1	1	1	1	1	1	1	1	1	1	1	1	1	1	0	0	1	1	1	1	1	1	1	1	1
O. sativa	B140	XI-1A	XI-1A	1	1	1	0	1	1	1	1	1	1	1	1	1	nocov	1	1	1	1	1	1	1	1	1	1	1	1	1	1	1	1	1	0	1	1	1	0	0	1	1	nocov	1	1	1	1	1	1
O. sativa	B141	admix	admix	1	1	1	0	0	1	1	1	1	1	1	0	1	nocov	1	1	0	1	1	1	1	0	0	1	0	1	1	1	0	nocov	1	1	0	1	1	1	0	0	1	nocov	0	0	0	1	1	0
O. sativa	B142	admix	admix	0	0	nocov	1	0	nocov	nocov	1	0	0	nocov	1	1	1	0	0	0	1	nocov	0	1	1	0	0	1	0	nocov	1	1	nocov	1	0	0	1	0	0	0	0	1	nocov	0	nocov	0	1	0	0
O. sativa	B143	GJ-tmp	GJ-temp	nocov	0	0	0	0	nocov	0	1	0	0	0	0	1	nocov	0	1	1	1	nocov	1	0	1	0	1	1	0	nocov	1	1	nocov	1	0	0	nocov	0	0	0	0	0	nocov	nocov	0	0	0	0	0
O. sativa	B144	GJ-adm	GJ-adm	nocov	0	0	0	0	nocov	0	0	0	nocov	0	0	1	nocov	0	1	0	0	nocov	nocov	0	0	0	1	0	1	nocov	1	0	nocov	0	nocov	0	nocov	nocov	1	0	0	nocov	nocov	0	nocov	0	0	0	0
O. sativa	B145	XI-adm	XI-1	1	1	1	0	1	1	1	1	1	1	1	1	1	nocov	1	1	1	1	1	1	1	1	nocov	1	1	1	1	1	1	1	0	1	1	1	1	0	1	1	1	nocov	1	1	1	1	1	1
O. sativa	B146	XI-1B	XI-1B2	1	1	1	0	1	1	1	1	1	1	1	1	1	nocov	1	1	0	1	1	1	1	1	1	1	1	1	1	1	1	1	1	1	1	1	1	0	1	1	1	1	1	1	1	1	1	1
O. sativa	B147	XI-1A	XI-1A	1	1	1	1	1	1	1	1	0	1	1	1	1	nocov	1	1	1	1	1	1	1	1	1	1	1	1	1	1	1	1	1	1	1	nocov	0	1	0	1	1	1	1	1	1	1	1	1
O. sativa	B148	GJ-adm	GJ-adm	0	0	0	1	0	1	0	0	0	0	0	0	nocov	nocov	0	0	0	0	nocov	0	0	0	0	0	0	0	nocov	nocov	1	nocov	0	0	0	nocov	0	1	0	0	0	nocov	nocov	0	0	0	0	0
O. sativa	B149	XI-1A	XI-1A	1	1	1	0	1	1	1	1	1	1	1	1	1	1	1	1	1	1	1	1	1	1	1	1	1	1	1	1	1	1	0	1	0	1	1	0	0	1	1	1	1	1	1	1	1	1
O. sativa	B150	XI-1A	XI-1A	nocov	1	1	0	1	1	1	0	0	1	1	1	1	nocov	1	1	1	1	1	1	1	1	1	1	1	1	1	1	1	1	1	1	1	1	1	0	0	1	1	1	1	1	1	1	0	1
O. sativa	B151	XI-1A	XI-1A	1	1	1	0	1	1	1	1	0	1	1	1	1	nocov	1	1	1	1	1	1	1	1	1	1	1	1	1	1	1	1	1	1	1	1	1	0	0	1	1	1	1	1	1	1	1	1
O. sativa	B152	GJ-tmp	GJ-temp	1	0	1	1	1	1	1	1	1	1	0	1	1	nocov	1	1	1	1	1	1	1	1	1	1	1	1	nocov	0	1	1	1	0	1	nocov	0	1	0	1	1	nocov	0	0	0	1	1	1
O. sativa	B153	XI-adm	XI-1	1	1	1	0	1	1	1	1	1	1	1	1	1	nocov	1	1	1	0	1	1	1	1	1	1	1	1	1	1	1	1	1	1	1	nocov	1	0	0	1	1	1	1	nocov	1	1	1	1
O. sativa	B154	GJ-tmp	GJ-temp	0	0	0	1	1	nocov	0	1	0	0	0	0	1	0	1	1	0	0	nocov	0	0	0	0	1	0	0	nocov	0	1	nocov	0	0	0	0	1	1	0	0	0	nocov	0	1	0	0	0	0
O. sativa	B155	XI-adm	XI-1	1	1	0	0	1	1	1	1	0	1	0	1	1	nocov	1	1	1	1	1	1	1	1	1	1	1	1	1	1	1	1	1	1	1	nocov	1	1	0	0	1	nocov	1	1	1	1	1	1
O. sativa	B156	XI-1A	XI-1A	1	1	1	0	1	1	1	1	1	1	1	1	1	1	1	1	1	1	1	1	1	1	1	1	1	1	1	1	1	1	1	1	1	1	1	0	0	1	1	1	1	1	1	1	1	1
O. sativa	B157	XI-1A	XI-1A	1	1	1	0	1	1	1	1	1	1	1	1	1	nocov	1	1	0	1	1	1	1	1	1	1	1	1	1	1	1	1	0	1	1	1	1	0	1	1	1	1	1	1	1	1	1	1
O. sativa	B158	admix	admix	1	1	1	1	1	1	1	1	1	1	1	1	1	nocov	1	1	0	1	1	1	1	1	1	1	1	1	1	1	1	1	0	0	1	nocov	1	1	0	1	1	1	1	1	1	1	1	1
O. sativa	B159	XI-adm	XI-1	1	1	1	0	1	1	1	1	1	1	1	1	1	nocov	1	1	1	0	1	1	1	1	1	1	1	1	1	1	1	1	1	1	1	nocov	1	0	0	1	1	1	1	1	1	1	1	1
O. sativa	B160	GJ-tmp	GJ-temp	0	0	0	1	0	nocov	0	0	0	0	0	0	1	nocov	0	0	0	0	nocov	0	0	0	0	0	0	0	nocov	0	1	nocov	0	0	0	nocov	0	1	0	0	0	nocov	0	0	0	0	0	0
O. sativa	B161	GJ-tmp	GJ-temp	0	0	0	1	0	0	1	0	0	0	0	0	1	nocov	0	0	0	0	nocov	0	0	0	0	0	0	0	nocov	nocov	0	nocov	0	0	0	nocov	0	1	0	0	0	nocov	0	0	0	0	0	0
O. sativa	B162	GJ-tmp	GJ-temp	0	0	0	1	0	nocov	0	0	0	0	0	0	1	nocov	0	0	0	0	nocov	0	0	0	0	0	0	0	nocov	nocov	0	nocov	0	0	0	0	0	0	0	0	1	nocov	0	0	0	0	0	0
O. sativa	B163	XI-1A	XI-1A	1	1	1	0	1	1	1	1	1	1	1	1	1	1	1	1	1	1	1	1	1	1	1	1	1	1	1	1	1	1	1	0	1	nocov	1	0	0	0	1	1	1	1	1	1	0	1
O. sativa	B164	cA(Aus)	cA1	1	1	1	0	1	1	1	1	1	nocov	0	nocov	1	nocov	1	1	1	0	1	1	1	1	0	0	0	0	nocov	1	1	1	0	0	0	nocov	1	0	1	0	1	nocov	1	1	1	1	0	0
O. sativa	B165	XI-adm	XI-adm	1	1	1	1	1	1	1	1	1	1	1	1	1	nocov	1	1	1	1	1	1	1	1	1	1	1	1	nocov	1	1	1	1	0	0	nocov	1	0	1	0	1	nocov	1	1	1	1	1	1
O. sativa	B166	GJ-tmp	GJ-temp	0	0	0	1	0	nocov	0	0	0	0	0	0	1	nocov	0	0	0	0	nocov	0	0	0	nocov	nocov	0	0	nocov	nocov	0	nocov	0	0	0	nocov	0	1	0	0	nocov	nocov	nocov	nocov	0	0	0	0
O. sativa	B167	GJ-tmp	GJ-temp	0	0	0	1	0	nocov	0	0	0	0	0	0	1	0	0	0	0	0	nocov	0	0	0	0	0	0	0	nocov	0	1	nocov	0	0	0	nocov	0	1	0	0	0	nocov	0	nocov	0	0	0	0
O. sativa	B168	GJ-tmp	GJ-temp	0	nocov	0	1	0	0	0	0	0	0	nocov	0	1	nocov	0	1	0	0	nocov	0	0	0	nocov	0	0	1	nocov	0	1	nocov	0	0	0	nocov	0	1	0	0	0	nocov	0	nocov	0	0	0	0
O. sativa	B169	GJ-tmp	GJ-temp	0	0	nocov	1	0	nocov	0	0	0	0	0	0	1	nocov	0	0	0	0	nocov	0	0	0	0	0	0	0	nocov	0	1	nocov	0	0	0	nocov	0	1	0	nocov	0	nocov	0	nocov	0	0	0	0
O. sativa	B170	GJ-tmp	GJ-temp	0	0	0	1	0	nocov	0	0	0	0	0	0	1	nocov	0	0	0	0	nocov	0	0	0	0	0	0	1	nocov	nocov	0	nocov	0	0	0	nocov	0	1	0	0	0	nocov	nocov	nocov	0	0	0	0
O. sativa	B171	GJ-tmp	GJ-temp	0	0	nocov	1	0	nocov	0	0	0	0	0	0	1	nocov	0	0	0	0	nocov	0	0	0	0	0	0	0	nocov	0	0	nocov	0	0	0	nocov	0	1	0	0	0	nocov	0	nocov	0	0	0	0
O. sativa	B173	admix	admix	1	1	0	0	1	nocov	1	1	1	1	1	0	1	nocov	1	1	1	1	1	1	1	1	1	1	1	0	nocov	1	1	1	0	1	1	nocov	0	1	1	0	1	nocov	1	nocov	1	0	0	0
O. sativa	B176	XI-adm	XI-adm	1	1	0	0	0	nocov	1	1	1	1	1	1	1	nocov	1	1	0	0	1	1	1	0	1	1	0	1	1	1	1	1	1	1	1	1	1	0	1	1	1	1	1	1	1	0	1	1
O. sativa	B179	GJ-tmp	GJ-temp	0	0	0	1	0	nocov	0	0	0	0	0	0	1	nocov	0	0	0	0	nocov	1	0	0	0	0	0	0	nocov	nocov	0	nocov	0	0	0	nocov	0	1	0	0	0	nocov	0	0	0	0	0	0
O. sativa	B180	XI-adm	XI-adm	1	1	1	0	1	1	1	1	1	0	1	1	1	nocov	1	1	0	1	1	1	1	1	1	1	1	1	1	1	1	1	1	1	1	1	1	0	1	0	1	1	1	nocov	1	1	1	1
O. sativa	B181	XI-1A	XI-1A	1	1	1	0	1	1	1	1	1	1	1	1	1	nocov	1	1	1	1	1	1	1	1	1	1	1	1	1	1	1	1	0	1	1	1	1	0	0	1	1	1	1	nocov	nocov	1	1	1
O. sativa	B182	GJ-tmp	GJ-temp	0	0	0	1	0	0	0	0	0	0	0	0	1	nocov	0	0	0	0	nocov	0	0	0	0	0	0	0	nocov	nocov	1	nocov	0	0	0	nocov	0	1	0	0	0	nocov	0	0	0	0	0	0
O. sativa	B183	GJ-tmp	GJ-temp	0	0	0	1	0	nocov	0	0	0	0	0	0	1	nocov	0	0	0	0	nocov	1	0	0	0	0	0	0	nocov	1	1	0	0	0	0	nocov	0	1	0	0	0	nocov	1	0	0	0	0	0
O. sativa	B184	XI-adm	XI-3B	1	1	1	0	1	1	1	1	1	1	1	1	1	1	1	1	0	0	1	1	1	1	0	1	1	1	1	1	1	1	1	1	1	nocov	1	0	0	1	1	1	1	1	0	1	1	1
O. sativa	B185	XI-adm	XI-1	1	1	1	0	1	1	1	1	1	1	1	1	1	nocov	1	1	1	1	1	1	1	1	1	1	1	1	1	1	1	1	1	1	1	1	1	0	0	nocov	1	1	1	1	1	1	1	1
O. sativa	B187	XI-adm	XI-adm	1	1	1	0	1	1	1	1	1	1	nocov	1	1	1	1	1	1	1	1	1	1	1	1	1	1	1	1	1	1	1	1	1	1	1	nocov	0	0	1	1	nocov	1	1	1	1	1	1
O. sativa	B188	GJ-trp	GJ-trop1	0	0	0	1	0	nocov	nocov	0	0	0	0	0	1	nocov	0	0	0	0	nocov	0	0	0	0	0	0	0	nocov	1	0	nocov	1	0	0	nocov	0	1	0	0	0	nocov	1	0	0	0	0	0
O. sativa	B189	GJ-trp	GJ-trop1	0	1	0	1	0	1	0	0	0	0	0	0	1	nocov	0	0	0	0	nocov	nocov	0	0	0	0	0	0	nocov	1	0	nocov	0	0	0	nocov	0	1	0	0	0	nocov	0	0	0	0	0	0
O. sativa	B190	GJ-trp	GJ-trop1	0	0	0	1	0	1	0	0	0	1	0	0	1	nocov	0	0	0	0	nocov	0	0	0	0	0	0	0	nocov	1	1	nocov	0	0	0	nocov	0	1	0	1	0	nocov	0	0	1	0	0	0
O. sativa	B191	GJ-trp	GJ-trop1	nocov	0	0	1	0	nocov	0	0	1	1	0	0	1	nocov	0	0	0	0	nocov	0	0	0	0	0	0	1	nocov	0	1	nocov	0	0	0	nocov	0	1	0	1	0	nocov	1	nocov	0	0	0	0
O. sativa	B192	admix	admix	0	0	0	0	0	1	1	0	0	1	0	1	1	nocov	1	0	1	1	1	0	0	0	0	1	0	1	nocov	1	1	nocov	0	1	1	nocov	1	0	0	1	0	nocov	1	1	1	1	0	0
O. sativa	B193	XI-adm	XI-adm	1	1	1	0	1	1	1	1	1	1	1	1	1	nocov	1	1	0	1	1	nocov	1	1	1	1	1	1	nocov	1	1	1	1	1	1	1	1	0	1	0	1	1	1	1	1	1	1	1
O. sativa	B194	XI-1B	XI-1B2	1	1	1	0	1	1	1	1	1	1	1	1	1	nocov	1	1	1	1	1	1	1	1	1	1	1	1	1	1	1	1	1	1	1	1	1	1	1	0	1	1	1	1	1	1	1	1
O. sativa	B195	XI-adm	XI-1	1	0	1	0	1	1	1	1	1	1	1	1	1	nocov	1	1	1	1	1	1	1	1	1	1	1	1	1	1	1	1	1	1	1	1	1	1	0	0	1	1	1	1	1	1	1	1
O. sativa	B196	GJ-trp	GJ-trop1	0	1	1	1	0	nocov	0	0	0	0	1	0	1	nocov	0	0	0	0	nocov	0	0	0	0	0	0	1	nocov	nocov	1	nocov	0	0	0	nocov	0	1	0	nocov	0	nocov	0	nocov	0	0	0	0
O. sativa	B197	XI-1A	XI-adm	1	1	1	0	1	nocov	1	1	1	1	1	1	1	nocov	1	1	1	1	1	1	1	1	1	1	1	1	1	1	1	1	1	1	1	1	1	0	0	1	1	0	1	1	1	1	0	1
O. sativa	B198	XI-1A	XI-1A	1	1	1	0	1	1	1	1	0	1	1	1	1	nocov	1	1	1	1	1	1	1	1	1	1	1	1	1	1	1	1	1	0	0	nocov	1	0	0	1	1	nocov	1	1	1	1	1	1
O. sativa	B199	GJ-tmp	GJ-temp	0	0	1	1	0	nocov	0	0	0	0	0	0	nocov	nocov	0	0	0	0	nocov	0	0	0	0	0	0	0	nocov	nocov	1	nocov	0	0	0	nocov	0	1	0	0	0	nocov	0	0	0	nocov	0	0
O. sativa	B200	XI-1B	XI-1B	1	1	1	0	1	1	1	1	1	1	1	1	1	nocov	1	1	1	1	1	1	1	1	1	1	1	1	1	1	1	1	1	1	1	1	1	0	1	0	0	1	0	1	1	1	1	1
O. sativa	B201	XI-1B	XI-1B2	1	1	1	0	1	1	1	1	1	1	1	1	1	nocov	1	1	0	1	1	1	1	1	1	1	1	1	1	1	1	1	1	1	1	1	1	0	0	1	1	1	1	1	1	1	1	1
O. sativa	B202	XI-adm	XI-1	1	1	1	0	1	1	1	0	0	1	1	1	1	nocov	1	1	1	1	1	0	0	1	1	1	1	1	1	nocov	1	1	1	1	1	1	1	0	0	nocov	nocov	1	1	1	1	1	1	1
O. sativa	B203	XI-adm	XI-adm	1	1	1	0	1	1	1	1	0	1	1	1	1	nocov	1	1	nocov	1	1	1	1	1	nocov	1	nocov	1	nocov	1	1	1	1	0	0	1	1	0	1	nocov	1	nocov	1	1	1	1	1	1
O. sativa	B204	GJ-tmp	GJ-temp	0	0	0	1	0	nocov	0	0	0	0	0	0	1	0	0	0	0	0	nocov	0	0	0	0	0	0	0	nocov	nocov	0	nocov	0	0	0	nocov	1	1	0	0	0	nocov	0	0	0	0	0	0
O. sativa	B205	GJ-adm	GJ-adm	0	nocov	1	1	0	0	0	1	0	0	0	0	1	nocov	0	0	0	0	nocov	0	0	0	nocov	0	0	0	nocov	nocov	0	nocov	0	0	0	nocov	0	1	0	nocov	0	nocov	nocov	0	0	0	0	0
O. sativa	B207	XI-adm	XI-3B2	nocov	1	1	0	1	1	1	1	1	1	1	1	1	nocov	1	1	1	1	1	1	1	1	nocov	1	1	1	1	1	1	1	0	0	1	1	1	0	1	0	1	1	1	nocov	1	1	1	1
O. sativa	B208	XI-1A	XI-1A	1	1	1	0	1	1	1	1	1	1	1	1	1	1	1	1	1	1	1	1	1	1	1	1	1	1	1	1	1	1	1	1	1	1	1	0	0	1	1	1	1	1	1	1	0	1
O. sativa	B210	XI-1A	XI-1A	1	1	1	0	1	1	1	1	0	1	1	1	1	nocov	1	1	0	1	1	1	1	1	1	1	1	1	1	1	1	1	0	0	0	1	0	0	0	1	1	1	1	1	0	1	1	1
O. sativa	B212	GJ-tmp	GJ-temp	0	0	1	1	0	nocov	0	0	0	1	0	1	1	0	1	0	0	0	1	0	0	0	0	1	0	0	nocov	nocov	1	nocov	0	0	0	nocov	0	1	0	0	0	nocov	0	0	0	0	0	0
O. sativa	B213	XI-1A	XI-1A	1	1	1	0	1	1	1	1	0	1	1	1	1	nocov	1	1	1	1	1	1	1	1	1	1	1	1	nocov	1	1	1	1	nocov	0	1	1	0	0	1	1	nocov	1	1	1	1	1	1
O. sativa	B214	XI-1B	XI-1B2	1	1	1	0	1	1	1	1	1	1	1	1	1	nocov	1	1	0	1	1	1	1	1	1	1	1	1	1	1	1	1	1	1	1	1	1	0	1	1	1	1	1	1	1	1	1	1
O. sativa	B215	GJ-tmp	GJ-temp	0	0	0	1	0	nocov	0	0	0	0	0	0	nocov	nocov	0	0	0	0	nocov	0	0	0	0	0	0	0	nocov	nocov	0	nocov	0	0	0	0	0	1	0	0	0	nocov	0	0	0	0	0	0
O. sativa	B216	XI-1A	XI-1A	1	1	1	0	1	1	0	1	0	1	1	1	1	nocov	1	1	1	1	1	1	1	1	0	1	1	1	1	1	1	1	1	0	1	1	0	0	0	1	1	1	1	1	1	1	1	1
O. sativa	B217	XI-1B	XI-1B2	1	1	1	0	1	1	1	1	1	1	1	1	1	1	1	1	1	1	1	1	1	1	1	1	1	1	1	1	1	1	1	1	1	1	1	0	0	0	1	1	1	1	1	1	1	1
O. sativa	B218	GJ-tmp	GJ-temp	0	0	0	1	0	nocov	0	0	0	0	0	0	nocov	0	0	0	0	0	nocov	0	0	0	0	0	0	0	nocov	nocov	0	nocov	0	0	0	nocov	0	1	0	0	0	nocov	0	0	0	0	0	0
O. sativa	B219	XI-adm	XI-adm	1	1	1	0	1	1	1	1	1	1	1	1	1	1	1	1	1	1	1	1	1	1	1	1	1	1	1	1	1	1	1	1	0	nocov	1	0	1	1	1	1	1	1	1	1	1	1
O. sativa	B221	XI-1A	XI-1	1	1	1	0	1	1	1	1	1	1	1	1	1	1	1	1	1	1	1	1	1	1	1	1	1	1	1	1	1	1	0	0	0	1	1	0	1	1	1	1	1	1	1	1	1	1
O. sativa	B222	XI-1A	XI-1A	1	1	1	0	1	1	1	1	0	1	1	1	1	nocov	1	1	0	1	1	1	1	1	1	1	1	1	1	1	1	1	0	0	0	1	0	0	0	1	1	1	1	1	1	1	1	1
O. sativa	B223	GJ-tmp	GJ-temp	0	0	0	1	0	nocov	0	0	0	0	0	0	1	nocov	0	0	0	0	nocov	0	0	0	nocov	0	0	0	nocov	nocov	1	nocov	0	0	0	nocov	0	1	0	nocov	0	nocov	0	nocov	0	0	1	1
O. sativa	B224	XI-1A	XI-1A	1	1	1	0	1	1	1	1	1	1	1	1	1	nocov	1	1	1	1	1	1	1	1	1	1	1	1	1	1	1	1	1	1	1	nocov	1	0	0	1	1	nocov	1	nocov	1	1	1	1
O. sativa	B225	GJ-tmp	GJ-temp	0	0	0	1	0	nocov	0	0	0	0	0	0	nocov	nocov	0	0	0	0	nocov	0	0	0	0	0	0	0	nocov	nocov	0	nocov	0	0	0	0	0	1	0	0	1	nocov	0	0	0	0	0	0
O. sativa	B226	GJ-tmp	GJ-temp	0	0	0	1	0	0	0	0	0	0	0	0	1	0	0	0	0	0	nocov	0	0	0	0	0	0	0	nocov	nocov	1	nocov	0	0	0	nocov	0	1	0	0	0	nocov	0	0	0	0	0	0
O. sativa	B227	XI-adm	XI-3B2	1	1	1	0	1	1	1	1	1	1	1	1	1	nocov	1	1	0	1	1	1	1	1	nocov	1	1	1	1	1	1	nocov	1	1	1	1	1	0	0	1	1	1	0	1	1	1	1	1
O. sativa	B228	GJ-adm	GJ-adm	0	0	0	1	0	nocov	0	0	0	0	0	0	1	nocov	0	0	0	0	nocov	0	0	0	0	0	0	0	nocov	1	1	nocov	0	0	0	nocov	0	1	0	1	1	nocov	0	0	0	0	0	0
O. sativa	B229	XI-adm	XI-adm	1	1	1	0	1	1	1	1	1	1	1	1	1	1	1	1	1	1	1	1	1	1	1	1	1	1	1	1	1	nocov	1	1	0	nocov	1	0	0	1	1	nocov	1	1	1	1	1	1
O. sativa	B230	GJ-adm	GJ-temp	0	0	0	1	0	nocov	1	0	0	0	0	0	1	nocov	0	0	0	0	nocov	0	0	0	0	0	0	0	nocov	nocov	1	0	0	0	0	nocov	0	1	0	0	0	nocov	0	0	0	0	0	0
O. sativa	B231	XI-adm	XI-3B2	1	1	1	0	1	1	1	1	1	1	1	1	1	nocov	1	1	1	1	1	1	1	1	1	1	1	1	1	1	1	1	1	0	1	nocov	1	0	1	nocov	nocov	1	1	1	1	1	1	1
O. sativa	B232	XI-1B	XI-1B2	1	1	1	0	1	1	1	1	1	1	1	1	1	nocov	1	1	0	1	1	1	1	1	1	1	1	1	1	1	1	1	1	1	1	1	0	0	0	0	1	nocov	1	1	1	1	1	1
O. sativa	B233	XI-adm	XI-1	1	1	1	0	1	1	1	1	1	1	1	1	1	1	1	1	1	1	1	1	1	1	1	1	1	1	1	1	1	1	0	1	1	1	1	0	0	0	1	1	1	1	1	1	1	1
O. sativa	B234	XI-1A	XI-1A	1	1	1	0	1	1	1	1	1	1	1	1	1	nocov	1	1	1	1	1	1	1	1	1	1	1	1	1	1	1	1	0	1	1	1	1	0	0	1	1	1	1	1	1	1	1	1
O. sativa	B235	GJ-tmp	GJ-temp	0	0	0	1	0	nocov	0	0	0	0	0	0	1	0	0	0	0	1	nocov	0	0	1	0	0	0	0	nocov	0	1	nocov	0	0	0	nocov	0	1	0	nocov	0	nocov	0	0	0	0	0	0
O. sativa	B236	GJ-tmp	GJ-temp	0	0	0	1	0	nocov	0	0	0	0	0	0	1	nocov	0	0	0	0	nocov	0	0	0	0	0	0	0	nocov	0	1	nocov	0	0	0	nocov	0	1	0	0	0	nocov	0	0	0	0	0	0
O. sativa	B238	XI-adm	XI-3B	1	1	1	0	1	1	1	1	1	1	1	1	1	nocov	1	1	0	1	1	1	1	1	1	1	1	1	1	1	1	1	1	1	1	nocov	1	0	0	0	1	nocov	0	0	1	1	1	1
O. sativa	B239	XI-1A	XI-1A	1	0	1	0	1	1	1	1	1	1	1	1	1	nocov	1	1	1	1	1	1	1	1	1	1	1	1	nocov	1	1	1	1	1	0	1	1	0	1	1	1	nocov	1	1	1	1	1	1
O. sativa	B240	GJ-tmp	GJ-temp	0	0	0	1	0	nocov	0	0	0	0	0	0	1	nocov	0	0	0	0	nocov	0	0	0	0	0	0	0	nocov	0	1	nocov	0	0	0	nocov	0	1	0	nocov	0	nocov	0	0	0	nocov	0	0
O. sativa	B241	GJ-sbtrp	GJ-subtrp	nocov	0	0	1	0	nocov	nocov	0	0	0	0	0	1	0	0	0	0	0	nocov	0	0	0	0	0	0	0	nocov	1	0	nocov	0	0	0	nocov	0	1	0	0	1	nocov	0	0	0	0	0	0
O. sativa	B242	XI-adm	XI-adm	0	1	1	0	1	1	1	1	1	1	1	1	1	nocov	1	1	1	1	1	1	1	1	1	1	1	1	nocov	1	1	1	1	1	1	1	1	0	0	1	1	1	1	1	1	1	0	1
O. sativa	B243	cA(Aus)	cA1	1	1	1	0	1	1	1	1	1	nocov	0	nocov	1	nocov	1	1	1	0	1	1	1	1	nocov	0	0	0	nocov	1	1	1	0	0	0	1	nocov	0	1	0	1	nocov	1	1	1	1	0	0
O. sativa	B244	XI-1A	XI-1A	1	1	1	0	1	nocov	1	1	1	1	1	1	1	1	1	1	1	1	1	1	1	1	1	1	1	1	1	1	1	1	1	0	1	1	1	0	nocov	nocov	nocov	1	1	1	1	1	0	1
O. sativa	B245	GJ-sbtrp	GJ-subtrp	0	0	1	1	0	0	0	0	0	0	nocov	0	1	nocov	0	0	0	0	nocov	0	0	0	nocov	0	0	0	nocov	nocov	0	nocov	0	0	0	nocov	0	1	0	nocov	1	0	0	0	0	0	0	0
O. sativa	B246	XI-adm	XI-3B2	1	1	1	0	1	1	1	1	1	1	1	1	1	nocov	1	1	1	1	1	1	1	1	1	1	1	1	1	1	1	1	1	1	1	nocov	1	0	1	0	1	nocov	1	1	1	1	1	1
O. sativa	B247	XI-adm	XI-3B	1	1	1	0	1	1	1	1	1	1	1	1	1	1	1	1	1	1	1	1	1	1	1	1	1	1	1	1	1	1	1	1	1	1	1	0	1	1	1	nocov	1	1	1	1	1	1
O. sativa	B248	XI-1A	XI-1A	1	1	1	0	1	1	1	1	1	1	1	1	1	nocov	1	1	1	1	1	1	1	1	1	1	1	1	1	1	1	1	1	1	1	1	1	0	0	1	1	1	1	1	1	1	1	1
O. sativa	B249	XI-1A	XI-1A	1	1	1	0	1	1	1	1	1	1	1	1	1	nocov	1	1	1	1	1	1	1	1	1	1	1	1	1	1	1	1	1	1	1	1	1	0	0	1	1	1	1	1	1	1	0	1
O. sativa	B250	GJ-tmp	GJ-temp	0	0	0	1	0	0	0	0	0	0	0	0	1	nocov	0	0	0	0	nocov	0	0	0	0	0	0	0	nocov	nocov	0	nocov	0	0	0	0	0	1	0	0	0	nocov	0	0	0	0	0	0
O. sativa	B252	XI-adm	XI-1	1	1	1	0	1	1	0	1	1	1	1	1	1	nocov	1	1	1	0	1	1	1	1	1	1	1	1	1	1	1	1	1	1	1	1	1	0	0	1	1	1	1	nocov	1	1	1	1
O. sativa	B253	XI-adm	XI-1	1	1	1	0	1	1	0	0	1	1	1	1	1	1	1	1	0	1	1	1	0	1	1	1	1	1	1	nocov	1	1	1	1	0	1	1	1	0	1	1	1	1	1	1	1	1	1
O. sativa	B254	XI-adm	XI-1	1	1	1	0	1	1	1	0	1	1	1	1	1	1	1	1	0	1	1	1	1	1	1	1	1	1	1	nocov	1	1	1	1	0	1	1	0	0	1	1	1	1	1	1	1	1	1
O. sativa	B255	XI-adm	XI-1	1	1	1	0	1	1	1	1	0	1	1	1	1	1	1	1	1	1	1	1	1	1	1	1	1	1	1	1	1	1	1	1	1	1	1	1	0	1	1	nocov	1	1	1	1	1	1
O. sativa	B258	GJ-tmp	GJ-temp	0	0	0	1	0	nocov	0	0	0	0	0	0	1	0	0	0	0	0	nocov	0	0	0	0	0	0	0	nocov	nocov	0	nocov	0	0	0	nocov	0	1	0	0	0	nocov	0	0	0	0	0	0
O. sativa	B259	XI-1A	XI-1A	1	1	1	0	1	1	1	1	0	1	1	1	1	1	1	1	1	1	1	1	1	1	1	1	1	1	1	1	1	1	1	1	0	1	1	0	0	1	1	nocov	1	1	1	1	1	1
O. sativa	B260	XI-1A	XI-1A	1	1	1	0	1	1	1	1	1	1	1	1	1	nocov	1	1	1	1	1	1	1	1	1	1	1	1	1	1	1	1	0	0	0	1	1	0	0	1	1	1	1	1	1	1	0	1
O. sativa	B261	XI-1A	XI-1A	1	1	1	0	1	1	1	1	1	1	1	1	1	1	1	1	1	1	1	1	1	1	1	1	1	1	1	1	1	1	1	1	1	1	1	0	0	1	1	1	1	1	1	1	1	1
O. sativa	B263	GJ-tmp	GJ-temp	0	0	0	1	0	nocov	0	0	0	0	0	0	1	nocov	0	0	0	0	nocov	0	0	0	nocov	0	0	0	nocov	nocov	0	nocov	0	0	0	0	0	1	0	0	0	0	0	0	0	0	0	0
O. sativa	B264	XI-1A	XI-1A	1	1	1	0	1	1	1	1	1	1	1	1	1	1	1	1	1	1	1	1	1	1	1	1	1	1	1	1	1	1	1	0	1	1	1	0	0	1	1	nocov	1	1	1	1	1	1
O. sativa	B265	XI-adm	XI-3B2	1	1	1	1	1	1	1	1	1	1	1	1	1	1	1	1	0	1	1	1	1	1	1	1	1	1	1	1	1	1	0	0	1	1	1	0	1	0	1	1	1	nocov	1	1	1	1
O. sativa	B266	GJ-sbtrp	GJ-subtrp	1	1	0	1	0	nocov	0	0	0	0	0	0	1	0	0	0	0	0	nocov	0	0	0	0	0	0	0	nocov	1	0	nocov	0	0	0	nocov	0	1	0	0	1	nocov	0	0	0	nocov	1	0
O. sativa	B267	XI-adm	XI-1	1	1	1	0	1	1	1	1	1	0	1	1	1	nocov	1	1	1	1	1	1	1	1	1	1	1	1	1	1	1	1	1	1	1	1	1	0	1	1	1	1	1	1	1	1	1	1
O. sativa	B268	XI-adm	XI-adm	1	1	1	0	1	1	1	1	0	1	1	1	1	nocov	1	1	0	1	1	1	1	1	1	1	1	1	1	1	1	1	1	1	0	1	nocov	0	0	1	1	nocov	1	1	0	1	1	1
O. sativa	B269	GJ-tmp	GJ-temp	0	0	0	1	0	nocov	0	0	0	0	0	0	1	0	0	0	0	0	nocov	0	0	0	0	0	0	0	nocov	0	1	nocov	0	0	0	nocov	0	1	0	0	0	0	0	0	0	0	0	0
O. sativa	CX100	XI-1B	XI-1B2	1	1	1	0	1	1	1	1	1	1	1	1	1	nocov	1	1	1	0	1	1	1	0	1	1	0	1	1	1	1	nocov	1	1	1	1	0	0	0	1	1	1	1	1	1	0	1	1
O. sativa	CX101	XI-1A	XI-1A	1	1	1	0	1	1	1	1	1	1	1	1	1	1	1	1	0	1	1	1	1	1	1	1	1	1	1	1	1	1	1	1	0	1	1	0	0	1	1	1	1	nocov	1	1	1	1
O. sativa	CX102	XI-1A	XI-1A	1	0	1	0	1	1	1	1	0	1	1	1	1	1	1	1	1	1	1	1	1	1	1	1	1	1	1	1	1	1	1	1	1	1	1	0	0	1	1	nocov	1	1	1	1	1	1
O. sativa	CX103	admix	XI-adm	0	0	0	0	1	1	1	1	0	0	0	1	1	0	1	0	1	1	1	1	1	0	1	0	0	1	nocov	1	1	1	1	1	0	1	0	0	1	0	1	nocov	0	1	1	1	0	0
O. sativa	CX104	cB(Bas)	cB	1	1	1	1	0	nocov	0	0	0	0	0	0	1	1	1	0	0	0	nocov	0	0	0	0	0	0	1	nocov	1	1	0	0	0	0	nocov	0	1	0	0	0	nocov	1	0	0	0	0	0
O. sativa	CX106	GJ-trp	GJ-trop1	0	1	1	1	0	1	0	0	0	1	0	0	1	0	0	0	0	0	nocov	0	0	0	0	0	0	1	nocov	1	1	nocov	0	0	0	nocov	0	1	0	1	0	nocov	0	0	0	0	0	0
O. sativa	CX107	XI-3	XI-3B1	1	1	1	0	1	1	1	1	1	1	1	1	1	1	1	1	1	1	1	1	1	1	1	1	1	1	1	1	1	1	1	0	0	1	1	0	1	0	1	nocov	1	1	1	1	1	1
O. sativa	CX108	admix	admix	1	1	1	0	1	1	1	1	1	1	1	1	1	0	1	1	1	0	1	1	1	1	1	1	1	1	1	1	1	1	0	1	1	1	1	0	0	0	1	1	1	1	1	1	1	1
O. sativa	CX109	GJ-adm	GJ-adm	0	0	0	1	0	0	0	0	0	0	0	0	1	0	0	1	0	0	nocov	0	0	0	0	0	0	0	nocov	1	1	nocov	0	0	0	nocov	0	1	0	0	0	nocov	0	0	0	0	0	0
O. sativa	CX10	XI-1A	XI-1A	1	1	1	0	1	1	1	0	0	1	1	1	1	1	1	1	1	1	1	1	0	1	1	1	1	1	1	nocov	1	1	1	1	0	1	1	0	0	1	1	1	1	1	1	1	1	1
O. sativa	CX110	cB(Bas)	cB	1	1	0	1	0	nocov	0	nocov	0	nocov	0	0	1	nocov	1	0	0	0	nocov	0	0	0	0	0	0	1	nocov	1	1	0	0	0	0	nocov	0	1	0	0	0	0	nocov	0	0	0	0	0
O. sativa	CX111	GJ-trp	GJ-trop1	0	0	0	1	0	nocov	0	0	0	0	0	0	1	0	0	0	0	0	nocov	0	0	0	0	0	0	0	nocov	1	1	nocov	0	0	0	nocov	0	1	0	0	0	0	0	0	1	0	0	0
O. sativa	CX112	admix	admix	nocov	0	1	1	1	nocov	0	0	1	0	0	0	nocov	1	1	0	0	0	1	0	0	1	0	0	0	0	nocov	1	1	0	0	0	1	nocov	0	1	0	0	0	nocov	0	0	0	0	0	0
O. sativa	CX113	GJ-trp	GJ-trop1	0	1	0	1	0	1	0	0	0	0	0	0	1	0	0	0	0	0	nocov	0	0	0	0	0	0	0	nocov	1	0	nocov	0	0	0	nocov	0	1	0	nocov	0	nocov	0	0	0	0	0	0
O. sativa	CX114	XI-1A	XI-1A	1	1	1	0	1	1	1	1	1	1	1	1	1	nocov	1	1	1	1	1	1	1	1	1	1	1	1	1	1	1	1	1	1	1	1	1	0	0	1	1	1	1	1	1	1	0	1
O. sativa	CX115	XI-adm	XI-adm	0	1	1	0	1	1	1	1	1	1	1	1	1	nocov	0	0	0	1	1	1	1	1	0	1	0	0	nocov	1	1	1	1	1	0	nocov	1	0	1	nocov	1	nocov	1	0	1	1	0	1
O. sativa	CX116	GJ-tmp	GJ-temp	0	0	0	1	0	nocov	0	0	0	0	0	0	1	nocov	1	0	0	0	nocov	0	0	0	0	0	0	0	nocov	nocov	0	0	0	0	0	nocov	1	1	0	nocov	0	nocov	0	0	0	0	0	0
O. sativa	CX117	XI-adm	XI-1	1	1	1	0	1	1	1	1	0	1	1	1	1	1	1	1	1	1	1	1	1	1	1	1	1	1	1	1	1	1	1	1	1	1	1	0	0	1	1	1	1	1	1	1	1	1
O. sativa	CX118	XI-adm	XI-1	1	1	1	0	1	1	1	1	1	0	1	1	1	1	1	1	1	1	1	1	1	1	1	1	1	1	1	1	1	1	1	1	1	1	1	0	0	0	1	nocov	1	1	1	1	1	1
O. sativa	CX119	XI-adm	XI-1	1	1	1	0	1	1	1	1	1	1	1	1	1	1	1	1	0	1	1	1	1	1	1	1	1	1	1	1	1	1	1	1	1	1	1	0	0	1	1	1	1	1	1	1	1	1
O. sativa	CX11	GJ-adm	GJ-adm	0	0	1	1	1	1	1	0	0	1	1	1	1	0	1	1	1	1	1	1	0	1	1	1	1	1	nocov	0	1	nocov	1	1	1	1	1	1	0	0	1	1	1	1	1	1	1	1
O. sativa	CX120	XI-adm	XI-adm	1	1	1	0	1	1	1	0	1	1	1	1	1	1	1	1	1	1	1	1	0	1	0	1	1	1	1	1	1	1	1	1	1	nocov	1	1	0	0	0	1	1	0	1	0	1	1
O. sativa	CX121	XI-1B	XI-1B	1	1	1	0	1	1	1	1	1	1	0	1	1	1	1	1	1	0	1	1	1	1	1	1	1	1	1	1	1	1	1	1	1	1	1	0	0	1	1	nocov	nocov	nocov	1	1	1	1
O. sativa	CX122	XI-adm	XI-1B	1	1	1	0	1	1	1	1	1	1	1	1	1	1	1	1	1	1	1	1	1	1	1	1	1	1	1	1	1	1	0	1	1	1	1	1	0	1	1	nocov	1	1	1	1	1	1
O. sativa	CX123	XI-1A	XI-1A	1	1	1	0	1	1	1	1	0	1	1	1	1	1	1	1	1	1	1	1	1	1	1	1	1	1	1	1	1	1	1	0	0	nocov	1	0	0	1	1	1	1	1	1	1	1	1
O. sativa	CX124	XI-adm	XI-adm	0	1	1	1	1	1	1	1	1	1	1	0	1	1	1	1	0	1	1	1	1	1	0	1	1	1	nocov	1	1	1	1	1	0	nocov	0	0	1	1	1	1	0	nocov	1	1	0	1
O. sativa	CX125	XI-1B	XI-1B2	1	1	1	0	1	1	1	1	1	1	1	1	1	1	1	1	1	1	1	1	1	1	1	1	1	1	1	1	1	1	1	1	1	1	1	0	1	0	1	1	1	1	1	1	1	1
O. sativa	CX126	XI-1B	XI-1B2	1	1	1	0	1	1	1	1	1	1	1	1	1	nocov	1	1	1	1	1	1	1	1	1	1	1	1	1	1	1	1	1	1	1	1	1	0	0	0	1	1	1	1	1	1	1	1
O. sativa	CX128	XI-adm	XI-adm	1	1	nocov	0	1	1	1	1	1	1	1	1	1	1	1	1	1	0	1	1	1	1	nocov	1	1	1	nocov	1	1	1	1	1	1	1	1	0	0	1	1	1	1	nocov	1	1	1	1
O. sativa	CX129	GJ-trp	GJ-trop2	nocov	0	0	1	0	nocov	nocov	0	0	0	0	0	1	nocov	0	0	0	1	nocov	0	0	0	0	0	0	0	1	nocov	1	nocov	0	0	0	nocov	0	1	0	nocov	1	1	nocov	nocov	0	0	0	0
O. sativa	CX12	XI-adm	XI-1	1	1	0	0	1	1	1	1	1	1	0	1	1	nocov	1	1	1	1	1	1	1	1	1	1	1	1	1	1	1	1	1	1	1	1	1	0	0	1	1	1	1	1	1	1	1	1
O. sativa	CX130	XI-2	XI-2B	1	1	1	0	1	1	1	1	1	1	1	1	1	nocov	1	1	1	1	1	1	1	1	1	1	1	1	1	1	1	1	1	0	1	nocov	0	0	0	1	1	nocov	1	1	1	1	1	1
O. sativa	CX131	XI-1A	XI-1A	1	1	1	0	1	1	1	1	0	1	1	1	1	nocov	1	1	1	1	1	1	1	1	1	1	1	1	1	1	1	1	1	1	0	1	1	0	0	1	1	1	1	1	1	1	1	1
O. sativa	CX132	GJ-trp	GJ-trop1	nocov	0	0	1	0	nocov	0	0	0	0	nocov	0	1	nocov	0	0	0	0	nocov	0	0	0	0	0	0	0	nocov	1	1	nocov	0	0	0	nocov	0	1	0	0	0	nocov	1	0	1	0	0	0
O. sativa	CX133	XI-1A	XI-1A	1	1	1	0	1	1	0	0	0	1	1	1	1	1	1	1	1	1	1	1	0	0	1	1	1	1	1	nocov	1	1	1	1	0	1	1	0	0	1	1	1	1	1	1	1	1	1
O. sativa	CX134	XI-1B	XI-1B2	1	1	1	0	1	1	1	1	1	1	1	1	1	1	1	1	1	0	1	1	1	1	1	1	1	1	1	1	1	1	1	1	1	1	1	0	0	0	1	1	1	1	1	1	1	1
O. sativa	CX138	GJ-adm	GJ-adm	0	0	0	0	0	nocov	0	0	0	0	0	0	1	0	1	0	0	0	nocov	1	0	0	0	0	0	0	nocov	0	0	nocov	0	0	0	nocov	0	1	0	0	0	nocov	0	0	0	0	0	0
O. sativa	CX139	GJ-adm	GJ-adm	0	0	0	1	0	0	0	0	0	0	0	0	1	0	0	1	0	0	nocov	0	0	0	0	0	0	0	nocov	1	0	nocov	0	0	0	nocov	0	1	0	0	0	nocov	0	0	0	0	0	0
O. sativa	CX13	XI-adm	XI-1B	1	1	1	1	1	1	1	1	1	1	1	1	1	nocov	1	1	1	1	1	1	1	1	1	1	1	1	1	1	1	1	1	1	1	1	1	1	0	1	1	1	1	0	1	1	1	1
O. sativa	CX140	GJ-tmp	GJ-temp	0	0	0	1	0	nocov	0	0	0	0	0	0	1	0	0	0	0	0	nocov	0	0	0	0	0	0	0	nocov	0	0	nocov	0	0	0	nocov	0	1	0	0	0	nocov	0	0	0	nocov	0	0
O. sativa	CX141	XI-3	XI-3A	1	1	1	0	1	1	1	1	1	1	1	1	1	nocov	1	1	0	1	1	1	1	1	1	1	1	1	1	1	1	1	1	0	1	1	1	0	1	0	1	1	1	1	1	1	1	1
O. sativa	CX142	GJ-adm	GJ-adm	0	0	0	1	0	nocov	0	0	0	0	0	0	1	0	0	0	0	0	0	0	0	0	0	0	0	1	nocov	nocov	0	nocov	0	0	0	nocov	0	1	0	0	0	0	0	0	0	0	0	0
O. sativa	CX143	cB(Bas)	cB	1	0	1	1	0	nocov	0	0	0	0	1	0	1	1	1	0	0	0	nocov	0	0	0	0	0	0	0	nocov	1	0	0	0	0	0	nocov	0	0	0	0	0	nocov	1	0	nocov	0	0	0
O. sativa	CX144	XI-adm	XI-adm	1	1	1	0	1	1	1	1	1	1	1	1	1	nocov	1	1	1	1	1	1	1	1	1	1	1	1	1	1	1	1	1	0	1	1	1	0	0	0	1	1	1	1	1	1	0	1
O. sativa	CX145	XI-adm	XI-adm	1	1	1	0	1	1	1	1	1	1	1	1	1	nocov	1	1	1	1	1	1	1	1	1	1	1	1	1	1	1	1	1	1	1	1	1	0	1	1	1	1	1	1	1	1	1	1
O. sativa	CX146	XI-adm	XI-1B	1	1	1	0	1	1	1	1	1	1	1	1	1	1	1	1	1	1	1	1	1	1	1	1	1	1	1	1	1	1	1	1	1	1	1	0	0	0	0	1	0	1	1	1	0	1
O. sativa	CX147	XI-adm	XI-adm	1	1	1	0	1	1	1	1	1	1	1	1	1	1	1	1	0	1	1	1	1	1	1	1	1	1	1	1	1	1	1	1	1	1	1	0	1	1	1	nocov	1	1	1	1	1	1
O. sativa	CX148	XI-3	XI-3A	1	nocov	1	0	1	1	1	1	1	1	1	1	1	1	0	1	0	1	1	1	1	1	1	1	1	1	1	1	1	1	1	1	1	1	nocov	0	1	1	1	nocov	1	1	1	1	1	1
O. sativa	CX149	cB(Bas)	cB	1	1	0	1	0	nocov	1	nocov	0	0	0	1	1	1	1	0	1	0	nocov	0	0	0	0	0	0	0	nocov	1	1	0	0	0	0	nocov	0	1	0	0	0	nocov	nocov	0	1	0	0	0
O. sativa	CX14	GJ-tmp	GJ-temp	0	nocov	0	1	0	nocov	0	0	0	0	0	0	1	0	0	0	0	0	nocov	0	0	0	0	0	0	0	nocov	0	0	nocov	0	0	0	nocov	0	1	0	0	0	nocov	0	0	0	0	0	0
O. sativa	CX150	XI-1B	XI-1B	1	1	1	0	1	1	1	1	1	1	0	1	1	1	1	1	1	1	1	1	1	1	1	1	1	1	1	1	1	1	1	1	1	1	1	0	1	0	1	1	0	1	1	0	1	1
O. sativa	CX151	GJ-trp	GJ-trop1	nocov	1	0	1	0	nocov	0	0	0	1	0	0	1	0	0	0	0	0	nocov	0	0	0	0	0	0	0	nocov	1	0	nocov	0	0	0	nocov	0	1	0	1	0	nocov	1	0	0	0	0	0
O. sativa	CX152	XI-1B	XI-1B	1	1	1	0	1	1	1	1	1	1	1	1	1	1	0	1	1	1	1	1	1	1	1	1	1	1	1	1	1	1	1	1	1	1	1	0	1	0	1	1	1	1	1	1	1	1
O. sativa	CX153	XI-2	XI-2A	1	1	1	0	1	1	1	1	1	1	1	1	1	1	1	1	1	1	1	1	1	1	1	1	1	1	1	1	1	1	1	1	0	1	1	0	0	1	1	1	1	nocov	0	1	0	1
O. sativa	CX154	XI-3	XI-3B1	1	0	1	0	1	1	1	1	1	1	1	1	1	1	1	1	0	1	1	1	1	1	1	1	1	1	1	1	1	1	1	0	0	1	1	0	1	0	1	1	1	1	1	1	1	1
O. sativa	CX155	XI-2	XI-2	1	0	1	0	1	1	1	1	1	1	1	1	1	1	1	1	1	1	1	1	1	1	1	1	1	1	1	1	1	1	1	1	0	1	0	0	0	1	1	nocov	1	0	1	1	1	1
O. sativa	CX156	XI-adm	XI-adm	1	1	1	0	1	1	1	1	1	1	1	1	1	1	1	1	1	1	1	1	1	1	1	1	1	1	1	1	1	1	1	1	1	1	1	0	0	1	1	1	1	1	1	1	1	1
O. sativa	CX157	XI-adm	XI-adm	1	1	1	0	1	1	1	1	1	1	nocov	1	1	1	1	1	1	1	1	0	1	1	1	1	1	1	1	1	1	1	1	1	0	nocov	1	0	1	0	1	nocov	1	0	1	1	1	1
O. sativa	CX158	XI-3	XI-3	1	0	1	0	1	1	1	1	1	1	1	1	1	1	0	1	0	1	1	1	1	1	1	1	1	1	1	1	1	1	1	1	0	1	1	0	1	0	1	0	1	0	1	1	1	1
O. sativa	CX15	XI-1B	XI-1B	1	1	1	0	1	nocov	1	1	0	1	1	1	1	nocov	1	1	1	1	1	1	1	1	1	1	1	1	1	1	1	1	1	1	1	1	1	0	0	0	1	1	0	1	1	1	1	1
O. sativa	CX160	XI-2	XI-2B	1	1	1	0	1	1	1	1	1	1	0	1	1	1	1	1	1	1	nocov	0	1	1	1	1	1	1	1	1	1	1	1	0	0	0	0	1	0	0	1	1	1	1	1	1	1	1
O. sativa	CX161	XI-1B	XI-1B1	1	1	1	0	1	1	1	1	1	1	1	1	1	1	1	1	1	1	1	1	1	1	1	1	1	1	1	1	1	1	1	1	1	1	1	0	1	1	1	nocov	0	1	1	1	1	1
O. sativa	CX162	XI-1A	XI-1A	1	1	1	0	1	1	1	1	1	1	1	1	1	nocov	1	1	1	1	1	1	1	1	1	1	1	1	1	1	1	1	1	1	1	1	1	0	0	0	1	1	1	1	1	1	1	1
O. sativa	CX165	GJ-tmp	GJ-temp	0	0	0	1	0	nocov	0	0	0	0	0	0	1	nocov	0	0	0	0	nocov	0	0	0	0	0	0	0	nocov	0	1	nocov	0	0	0	nocov	1	1	0	nocov	0	nocov	0	nocov	0	0	0	0
O. sativa	CX16	GJ-tmp	GJ-temp	0	0	0	1	0	nocov	0	0	0	0	0	0	1	nocov	0	0	0	1	nocov	0	0	0	nocov	0	0	0	nocov	nocov	1	nocov	0	0	0	nocov	1	1	0	0	1	nocov	0	0	0	0	0	0
O. sativa	CX17	XI-adm	XI-1	1	1	1	0	1	1	1	1	1	1	1	1	1	nocov	1	1	1	0	1	1	1	1	1	1	1	1	1	1	1	1	0	1	1	nocov	1	0	0	1	1	1	1	1	1	1	1	1
O. sativa	CX182	XI-adm	XI-adm	1	1	1	0	1	1	1	1	0	1	1	1	1	nocov	1	1	1	1	1	1	1	1	nocov	1	1	1	1	1	1	1	1	1	1	1	1	0	0	0	1	1	1	1	0	1	0	1
O. sativa	CX18	XI-1A	XI-1A	1	1	1	0	1	1	nocov	1	1	1	1	1	1	1	1	1	1	1	1	1	1	1	1	1	1	1	1	1	1	1	1	1	1	1	1	0	0	1	1	1	1	1	1	1	1	1
O. sativa	CX19	XI-adm	XI-1	1	1	1	0	1	1	1	1	1	1	1	1	1	nocov	1	1	0	0	1	1	1	1	1	1	1	1	1	1	1	1	0	1	1	1	1	0	0	1	1	1	1	nocov	1	1	1	1
O. sativa	CX205	GJ-adm	GJ-trop	0	0	1	0	0	nocov	0	0	0	0	0	0	1	nocov	1	0	0	0	1	0	0	0	0	0	0	0	1	1	0	nocov	0	0	0	nocov	0	1	0	0	1	nocov	0	0	1	0	0	0
O. sativa	CX206	XI-1B	XI-1B	1	1	1	0	1	1	1	1	1	1	1	1	1	nocov	1	1	0	1	1	1	1	1	1	1	1	1	1	1	1	1	1	1	1	1	1	0	1	1	1	1	1	1	1	1	1	1
O. sativa	CX207	XI-adm	XI-1	1	1	1	0	1	1	1	1	1	1	1	1	1	nocov	1	1	1	1	1	1	1	1	1	1	1	1	1	1	1	1	0	1	1	nocov	1	0	0	0	1	1	1	1	1	1	1	0
O. sativa	CX20	XI-adm	XI-1	1	1	1	0	1	1	1	1	1	1	1	1	1	nocov	1	1	0	1	1	1	1	1	1	1	1	1	1	1	1	1	0	1	1	1	1	0	1	0	1	1	0	1	1	1	1	0
O. sativa	CX210	admix	admix	1	1	1	0	1	1	1	1	1	1	0	1	1	1	1	1	1	1	1	1	1	1	1	1	1	1	nocov	1	1	1	1	1	1	1	1	1	1	0	1	1	1	1	1	1	1	1
O. sativa	CX211	GJ-tmp	GJ-temp	0	0	0	1	0	nocov	0	0	0	0	0	0	1	nocov	0	0	0	0	nocov	0	0	0	0	0	0	0	nocov	0	1	nocov	0	0	0	nocov	0	1	0	0	0	nocov	nocov	0	0	0	0	0
O. sativa	CX212	GJ-tmp	GJ-temp	0	0	0	1	0	nocov	0	0	0	0	0	0	1	nocov	0	1	0	0	nocov	0	0	0	0	0	0	0	nocov	0	1	nocov	0	0	0	nocov	0	1	0	0	0	nocov	0	nocov	0	0	0	0
O. sativa	CX213	GJ-tmp	GJ-temp	1	nocov	0	1	1	nocov	0	0	0	0	0	0	1	0	1	1	0	0	1	0	0	0	0	1	0	0	nocov	1	1	nocov	0	0	0	nocov	0	1	0	0	1	nocov	0	0	1	0	0	0
O. sativa	CX214	GJ-trp	GJ-trop1	nocov	0	0	1	0	nocov	nocov	0	0	0	0	0	1	nocov	0	0	0	0	nocov	0	0	0	nocov	0	0	0	nocov	1	0	nocov	0	0	0	nocov	0	1	0	0	0	nocov	1	0	1	0	0	0
O. sativa	CX218	XI-1B	XI-1B2	1	1	1	0	1	1	1	1	1	1	1	1	1	1	1	1	0	1	1	1	1	1	1	1	1	1	1	1	1	nocov	1	1	1	1	1	0	0	0	1	1	1	1	1	1	1	1
O. sativa	CX219	XI-adm	XI-1	1	1	1	0	1	1	1	1	1	1	1	1	1	1	1	1	1	1	1	1	1	1	1	1	1	1	nocov	1	1	1	1	1	1	1	1	0	0	1	1	nocov	1	1	1	1	1	1
O. sativa	CX21	XI-1B	XI-1B	1	1	1	0	1	1	1	1	1	1	1	1	1	1	1	1	0	1	1	1	1	1	1	1	1	1	nocov	1	1	1	1	1	1	1	1	0	1	0	1	1	1	1	1	1	1	1
O. sativa	CX220	GJ-trp	GJ-trop1	0	0	1	1	0	1	0	0	0	0	0	0	1	1	0	0	0	0	nocov	0	0	0	0	0	0	0	nocov	1	0	nocov	0	0	0	nocov	0	1	0	1	0	0	0	1	1	0	0	0
O. sativa	CX221	XI-adm	XI-1	1	1	1	0	1	1	1	1	1	0	1	1	1	1	1	1	1	1	1	1	1	1	1	1	1	1	1	1	1	1	1	1	1	1	1	0	0	1	1	1	1	1	1	1	1	1
O. sativa	CX225	XI-1B	XI-1B1	1	1	1	0	1	1	1	1	1	1	1	1	1	1	1	1	0	1	1	0	1	1	1	1	1	1	1	1	1	1	1	1	1	1	1	0	1	0	1	1	1	1	1	1	1	1
O. sativa	CX226	XI-1B	XI-1B1	1	1	1	0	1	1	1	1	1	nocov	1	1	1	nocov	1	1	0	0	1	1	1	1	1	1	1	1	nocov	1	1	nocov	1	1	1	nocov	1	0	1	0	1	1	1	1	1	1	1	1
O. sativa	CX227	cA(Aus)	cA-adm	1	1	1	0	1	1	1	1	1	0	0	1	1	1	1	1	1	1	1	1	1	1	0	1	1	1	nocov	1	1	1	1	1	1	1	1	0	1	0	1	1	1	1	0	1	0	1
O. sativa	CX228	XI-adm	admix	1	1	1	0	1	1	1	1	1	0	1	1	1	nocov	1	1	1	0	1	1	1	1	1	1	1	0	nocov	1	1	nocov	0	1	1	nocov	0	0	0	0	1	nocov	1	1	1	1	0	1
O. sativa	CX22	XI-1B	XI-1B2	1	1	1	0	1	1	1	1	1	1	1	1	1	nocov	1	1	1	1	1	1	1	1	1	1	1	1	1	1	1	1	1	1	1	nocov	1	0	0	0	1	1	1	1	1	1	1	1
O. sativa	CX230	XI-1B	XI-1B1	1	1	1	0	1	1	1	1	1	1	1	1	1	1	1	1	1	1	1	1	1	1	1	1	1	1	1	1	1	1	1	1	1	1	1	0	1	1	1	1	1	1	1	1	1	1
O. sativa	CX231	XI-adm	XI-adm	1	1	1	0	1	1	1	1	1	0	1	1	1	1	1	1	0	1	1	1	1	1	0	1	1	1	1	1	1	1	1	1	1	nocov	1	0	1	0	1	1	1	1	1	1	1	1
O. sativa	CX232	XI-adm	XI-3A	1	1	1	1	1	1	1	1	1	1	1	1	1	nocov	1	1	1	0	1	1	1	1	1	1	1	1	1	1	1	1	1	1	1	nocov	1	0	0	0	1	1	1	1	1	0	1	1
O. sativa	CX233	XI-adm	XI-adm	1	1	1	0	1	1	1	1	1	1	1	1	1	1	1	1	0	1	1	1	1	1	1	1	1	1	1	1	1	1	1	1	1	nocov	1	0	1	0	1	nocov	0	1	1	1	1	1
O. sativa	CX234	XI-adm	XI-adm	1	1	1	1	1	1	1	1	1	0	1	1	1	1	1	1	1	1	1	1	1	1	1	1	1	1	nocov	1	1	1	1	1	1	1	1	0	1	1	1	1	1	1	1	1	1	1
O. sativa	CX235	XI-adm	XI-3A	1	1	1	1	1	1	0	1	1	1	1	1	1	1	1	1	1	1	0	1	1	1	1	1	1	1	1	1	1	1	1	1	1	1	1	0	0	0	1	1	1	1	1	1	1	1
O. sativa	CX236	XI-adm	XI-adm	1	1	1	0	1	1	1	1	1	1	1	1	1	nocov	1	1	0	0	1	1	1	1	1	1	1	1	1	1	1	1	1	1	1	1	1	0	1	0	1	1	1	0	1	0	1	1
O. sativa	CX237	XI-1B	XI-1B	1	1	nocov	0	1	1	1	1	1	1	0	1	1	nocov	1	nocov	0	1	1	1	1	1	1	1	1	1	1	1	1	1	1	1	1	1	1	0	1	0	1	nocov	1	1	1	1	1	1
O. sativa	CX238	XI-1B	XI-1B	1	1	0	0	1	1	1	1	1	1	0	1	1	nocov	1	1	0	1	1	1	1	1	1	1	1	1	1	1	1	1	1	1	1	1	1	0	1	0	1	nocov	1	1	1	1	1	1
O. sativa	CX23	XI-3	XI-3A	1	1	1	0	1	1	1	1	1	1	1	1	1	nocov	1	1	0	1	1	1	1	1	1	1	1	1	1	1	1	1	1	0	1	1	1	0	1	0	1	nocov	1	0	1	1	1	1
O. sativa	CX240	XI-adm	XI-3A	1	1	1	0	1	1	1	1	1	1	1	1	1	1	1	1	0	1	1	1	1	1	1	1	1	1	1	1	1	1	1	1	1	1	1	0	1	0	1	1	1	0	1	1	1	1
O. sativa	CX241	GJ-trp	GJ-trop1	nocov	0	0	1	0	nocov	0	0	0	0	0	0	1	nocov	0	0	0	0	nocov	0	0	0	nocov	0	0	0	nocov	1	1	nocov	0	0	0	nocov	0	1	0	0	0	nocov	0	0	1	0	0	0
O. sativa	CX242	admix	admix	1	1	0	1	1	1	1	1	1	1	0	1	1	nocov	1	1	0	0	1	1	1	1	1	1	1	1	1	1	0	1	1	1	1	1	1	1	1	0	1	1	1	0	1	0	1	1
O. sativa	CX243	GJ-trp	GJ-trop1	0	1	1	1	1	1	0	0	1	1	0	1	1	0	1	1	0	0	nocov	1	1	1	0	1	1	1	nocov	1	1	1	0	0	1	nocov	1	1	0	0	0	nocov	1	0	0	0	1	1
O. sativa	CX247	XI-adm	XI-1	1	1	1	0	1	1	1	1	1	1	1	1	1	nocov	1	1	1	1	1	1	1	1	1	1	1	1	1	1	1	1	1	1	1	1	1	0	0	0	1	1	1	1	1	1	1	1
O. sativa	CX248	GJ-trp	GJ-trop1	0	0	0	1	0	nocov	0	0	0	1	0	0	1	nocov	0	0	0	0	nocov	0	0	0	0	0	0	1	nocov	1	0	nocov	0	0	0	nocov	0	1	0	nocov	0	nocov	1	0	0	0	0	0
O. sativa	CX249	XI-1B	XI-1B	1	1	1	0	1	1	1	1	1	1	1	1	1	nocov	1	1	0	1	1	1	1	1	1	1	1	1	1	1	1	1	1	1	1	nocov	1	0	0	1	1	nocov	1	1	1	1	1	1
O. sativa	CX24	XI-adm	XI-1B	1	0	1	0	1	1	1	1	1	1	nocov	1	1	nocov	1	1	1	1	1	0	1	1	1	1	1	1	1	1	1	1	1	0	1	1	0	0	0	1	1	nocov	1	1	1	1	1	1
O. sativa	CX250	XI-1B	XI-1B	1	1	1	0	1	1	1	1	1	1	1	1	1	1	1	1	1	1	1	1	1	1	1	1	1	1	1	1	1	1	1	1	1	1	1	0	0	0	1	1	1	1	1	1	1	1
O. sativa	CX251	GJ-tmp	GJ-temp	0	0	0	1	0	nocov	0	0	0	0	0	0	1	0	0	0	0	0	nocov	0	0	0	0	0	0	0	nocov	nocov	1	nocov	0	0	0	nocov	0	1	0	0	0	0	0	0	0	0	0	0
O. sativa	CX25	XI-1B	XI-1B	1	1	1	0	1	1	1	1	1	1	1	1	1	1	0	1	1	1	1	1	1	1	1	1	1	1	1	1	1	1	1	1	1	1	1	0	1	0	1	1	1	1	1	1	1	1
O. sativa	CX262	GJ-trp	GJ-trop1	0	0	0	1	0	nocov	0	0	0	1	0	0	1	0	0	0	0	0	nocov	0	0	0	0	0	0	1	nocov	1	1	nocov	0	0	0	nocov	0	1	0	0	0	nocov	1	0	1	0	0	1
O. sativa	CX263	XI-adm	XI-1	1	1	1	0	1	1	1	1	1	1	1	1	1	1	1	1	1	1	1	1	1	1	1	1	1	1	1	1	1	1	1	1	1	1	1	0	1	1	1	1	1	1	1	1	1	1
O. sativa	CX265	XI-adm	XI-1	1	1	1	0	1	1	1	1	1	1	1	1	1	nocov	1	1	1	1	1	1	0	1	1	1	1	1	1	1	1	1	1	1	1	1	1	0	0	1	1	1	1	1	1	1	1	1
O. sativa	CX266	GJ-trp	GJ-trop1	nocov	0	0	1	0	nocov	nocov	0	0	1	0	0	1	nocov	0	0	0	0	nocov	0	1	0	0	0	0	1	nocov	1	0	nocov	0	0	0	nocov	0	1	0	1	0	0	1	0	0	0	0	0
O. sativa	CX267	XI-adm	XI-1	1	1	1	0	1	1	1	1	1	1	nocov	1	1	1	1	1	1	1	1	0	1	1	1	1	1	1	1	1	1	1	1	1	1	1	0	0	0	1	1	nocov	1	1	1	1	1	1
O. sativa	CX268	XI-adm	XI-1	1	1	1	0	1	1	1	1	1	1	1	1	1	1	1	1	1	1	1	1	1	1	1	1	1	1	1	1	1	1	1	1	1	1	1	0	1	1	1	1	1	1	1	1	1	1
O. sativa	CX269	GJ-trp	GJ-trop1	0	0	0	1	0	nocov	0	1	0	0	0	0	1	0	0	0	0	0	nocov	0	0	0	0	0	0	0	nocov	1	1	nocov	0	0	0	nocov	0	1	0	0	0	0	0	0	1	0	0	0
O. sativa	CX26	XI-1B	XI-1B1	1	1	1	0	1	1	1	0	1	1	nocov	1	1	nocov	1	1	0	1	1	1	0	1	1	1	1	1	1	nocov	1	1	1	1	1	nocov	1	0	1	0	0	nocov	0	1	1	1	1	1
O. sativa	CX270	XI-1A	XI-1A	1	1	1	0	1	1	1	1	1	1	1	1	1	nocov	1	1	1	1	1	1	1	1	1	1	1	1	1	1	1	1	1	1	1	1	1	0	0	1	1	1	1	1	1	1	1	1
O. sativa	CX273	XI-adm	XI-adm	1	1	1	0	1	1	1	1	1	0	1	1	1	1	1	1	0	1	1	1	1	1	0	1	1	1	1	1	1	1	1	1	1	nocov	1	0	1	0	1	1	1	1	1	1	1	1
O. sativa	CX274	XI-adm	XI-adm	1	1	1	0	1	1	1	1	1	0	1	1	1	1	1	1	0	1	1	1	1	1	0	1	1	1	1	1	1	1	1	1	1	nocov	1	0	1	0	1	1	1	1	1	1	1	1
O. sativa	CX275	XI-adm	XI-adm	1	1	1	0	1	1	1	1	1	nocov	1	1	1	nocov	1	1	0	1	1	1	1	1	0	1	1	1	1	1	1	1	1	1	1	nocov	1	0	1	nocov	1	1	1	1	1	1	1	1
O. sativa	CX276	XI-1B	XI-1B1	1	1	1	0	1	1	1	1	1	1	1	1	1	nocov	1	1	0	1	1	1	1	1	0	1	1	1	1	1	1	1	1	1	1	1	1	0	1	1	1	1	1	nocov	1	1	1	1
O. sativa	CX277	GJ-adm	GJ-temp	0	0	0	0	0	nocov	0	0	0	0	0	0	1	nocov	1	1	0	0	0	0	0	0	0	0	0	0	nocov	0	0	nocov	0	0	0	nocov	0	1	0	0	0	nocov	0	0	0	0	0	0
O. sativa	CX278	XI-adm	XI-1	1	1	1	0	1	1	1	1	1	0	1	1	1	1	1	1	1	1	1	1	1	1	1	1	1	1	nocov	1	1	1	1	1	1	nocov	1	0	1	1	1	1	1	1	1	1	1	1
O. sativa	CX27	XI-adm	XI-adm	1	1	1	0	1	1	1	1	1	1	1	1	1	nocov	1	1	0	1	1	1	1	1	1	1	1	1	1	1	1	1	1	1	0	1	1	0	0	1	1	nocov	1	nocov	1	1	1	1
O. sativa	CX280	admix	admix	1	1	1	1	1	1	1	1	0	1	1	1	1	nocov	1	1	1	1	1	1	1	1	1	1	1	1	1	1	1	nocov	1	1	1	1	1	1	0	1	1	1	1	1	1	1	1	1
O. sativa	CX281	XI-1B	XI-1B	1	1	0	0	1	nocov	1	1	1	1	1	1	1	0	1	1	0	1	1	1	1	1	1	1	1	1	1	1	1	nocov	1	1	1	1	1	0	0	0	1	1	1	1	1	1	1	1
O. sativa	CX282	GJ-adm	GJ-adm	0	0	1	1	1	1	1	1	1	1	1	1	1	0	1	1	1	1	1	1	1	1	1	1	1	1	0	1	1	1	1	0	1	1	1	1	0	1	0	nocov	1	1	1	1	1	1
O. sativa	CX284	GJ-adm	GJ-adm	1	1	0	1	1	1	1	1	1	0	1	1	1	nocov	1	1	1	1	1	1	1	1	0	1	1	1	nocov	1	1	1	0	1	1	nocov	1	1	0	1	1	nocov	1	1	1	1	1	1
O. sativa	CX285	GJ-trp	GJ-trop	0	1	1	1	0	nocov	0	0	0	0	1	0	1	0	0	0	0	0	nocov	0	0	0	0	0	0	1	nocov	nocov	1	nocov	0	0	0	nocov	0	1	0	0	0	nocov	0	nocov	0	0	0	0
O. sativa	CX286	admix	admix	0	0	0	0	0	nocov	1	0	0	0	0	1	1	0	0	1	0	0	0	0	0	0	0	1	0	0	nocov	nocov	1	nocov	1	0	1	nocov	0	0	0	0	0	nocov	1	0	1	0	0	0
O. sativa	CX287	GJ-tmp	GJ-temp	0	0	0	1	0	nocov	1	0	0	nocov	0	0	1	nocov	0	0	0	0	1	0	0	0	0	0	0	0	0	nocov	0	nocov	0	0	0	nocov	0	1	0	0	0	nocov	nocov	0	0	0	0	0
O. sativa	CX288	XI-adm	XI-1	0	1	1	0	1	1	1	1	1	1	1	1	1	1	1	1	0	1	1	1	1	1	1	1	1	1	1	1	1	1	1	1	1	1	1	0	0	1	1	1	1	0	1	1	0	0
O. sativa	CX28	XI-1B	XI-1B2	1	1	1	0	1	0	1	1	1	1	1	1	1	nocov	1	1	0	1	1	1	1	1	1	1	1	1	1	1	1	1	1	1	1	1	1	0	0	0	1	1	nocov	1	1	1	1	1
O. sativa	CX290	XI-1B	XI-1B	1	1	1	0	1	1	1	1	1	1	1	1	1	1	1	1	1	1	1	1	1	1	1	1	1	1	1	1	1	1	1	1	1	1	1	0	1	1	1	1	1	1	1	1	1	1
O. sativa	CX291	XI-adm	XI-1	1	1	1	0	1	1	1	1	1	1	1	1	1	1	1	1	1	1	1	0	1	1	1	1	1	1	1	1	1	1	1	1	1	1	1	0	1	1	1	1	1	1	1	1	1	1
O. sativa	CX296	XI-adm	XI-1B	1	1	1	0	1	1	1	1	1	1	0	1	1	1	1	1	1	1	1	1	1	1	1	1	1	1	1	1	1	1	1	1	1	1	1	0	1	1	1	1	0	1	1	1	1	1
O. sativa	CX29	admix	admix	0	1	1	1	0	1	0	0	1	1	1	1	1	1	0	0	0	1	nocov	0	0	0	1	1	0	0	nocov	0	1	nocov	1	1	1	0	1	0	0	0	0	1	0	1	1	1	0	0
O. sativa	CX2	XI-adm	XI-1	1	1	1	0	1	nocov	1	1	1	1	1	1	1	1	1	1	0	1	1	1	1	1	1	1	1	1	1	1	1	1	0	1	1	1	1	0	1	1	1	1	1	1	1	1	1	1
O. sativa	CX303	XI-adm	XI-1	1	1	1	0	1	1	1	1	1	1	1	1	1	1	1	1	0	1	1	1	1	1	1	1	1	1	1	1	1	1	1	1	1	1	1	0	1	1	1	1	1	1	1	1	1	1
O. sativa	CX304	XI-adm	XI-3	1	0	1	1	1	1	1	1	1	1	1	1	1	nocov	1	1	1	1	1	1	1	1	1	1	1	1	1	1	1	1	1	1	1	1	0	0	0	0	1	1	1	1	1	0	1	1
O. sativa	CX305	XI-1B	XI-1B2	1	1	1	0	1	1	1	1	1	1	1	1	1	1	1	1	1	0	1	1	1	1	1	1	1	1	1	1	1	nocov	1	1	0	1	1	0	0	0	1	1	1	1	1	1	1	1
O. sativa	CX306	GJ-tmp	GJ-temp	0	0	0	1	0	nocov	0	0	0	0	0	0	1	nocov	0	0	0	0	nocov	0	0	0	0	0	0	0	nocov	0	0	nocov	0	0	0	nocov	0	1	0	0	0	nocov	0	nocov	0	nocov	0	0
O. sativa	CX307	GJ-adm	GJ-adm	1	0	1	1	0	0	0	0	1	1	0	0	1	0	1	1	0	1	nocov	0	0	0	0	0	0	1	nocov	0	1	nocov	0	0	0	nocov	0	1	0	1	0	nocov	0	0	1	0	1	1
O. sativa	CX30	XI-1B	XI-1B	1	1	1	0	1	1	1	1	1	1	1	1	1	nocov	1	1	1	1	1	1	1	1	1	1	1	1	1	1	1	1	1	1	1	1	1	0	1	0	1	1	1	1	1	1	1	1
O. sativa	CX313	XI-adm	XI-1	1	1	1	0	1	1	1	1	1	1	1	1	1	nocov	1	1	1	1	1	0	1	1	1	1	1	1	1	1	1	1	1	1	1	1	1	0	0	1	1	1	1	1	1	1	1	1
O. sativa	CX314	XI-1B	XI-1B	1	1	1	0	1	1	1	1	1	1	1	1	1	1	1	1	0	1	1	1	1	1	1	1	1	1	1	1	1	1	0	1	1	1	1	0	1	1	1	1	1	1	1	1	1	1
O. sativa	CX315	GJ-tmp	GJ-temp	0	0	0	0	0	nocov	0	0	0	0	0	0	1	nocov	1	0	0	0	nocov	0	0	0	0	0	0	0	nocov	0	1	0	0	0	0	nocov	0	1	0	0	0	0	0	0	0	0	0	0
O. sativa	CX316	admix	admix	1	0	0	0	0	nocov	0	0	1	1	0	0	1	nocov	0	1	0	0	nocov	1	0	0	1	1	0	0	nocov	nocov	1	1	1	0	0	nocov	0	0	0	0	0	nocov	0	1	1	1	1	0
O. sativa	CX317	GJ-tmp	GJ-temp	1	0	0	1	0	nocov	0	0	0	0	0	0	1	0	0	1	0	0	nocov	1	0	0	1	1	0	0	nocov	nocov	1	1	0	0	0	nocov	0	0	0	0	0	nocov	0	1	0	1	1	0
O. sativa	CX318	XI-adm	XI-1	1	1	1	0	1	1	1	1	1	1	1	1	1	nocov	1	1	0	0	1	0	1	1	1	1	1	1	1	1	1	1	1	1	1	1	1	0	0	0	1	1	1	1	1	1	1	1
O. sativa	CX319	XI-adm	XI-adm	1	1	1	0	1	1	1	1	0	1	1	1	1	nocov	1	1	1	1	1	1	1	1	0	1	1	1	1	1	1	1	1	1	1	1	1	0	0	0	1	1	1	1	0	1	0	1
O. sativa	CX31	XI-1B	XI-1B1	1	1	1	0	1	1	1	1	1	1	1	1	1	nocov	1	1	1	1	1	1	1	1	1	1	1	1	1	1	1	1	1	1	1	1	1	0	1	1	1	1	1	1	1	1	1	1
O. sativa	CX328	XI-1A	XI-1A	1	1	1	0	1	1	1	1	1	1	1	1	1	1	1	1	1	1	1	1	1	1	1	1	1	1	1	1	1	1	1	1	1	1	1	0	0	0	1	1	1	1	1	1	1	1
O. sativa	CX329	GJ-tmp	GJ-temp	0	0	0	0	0	nocov	0	0	0	0	0	0	1	nocov	0	0	0	0	nocov	0	0	0	nocov	0	0	0	nocov	nocov	0	nocov	0	0	0	nocov	0	1	0	0	0	nocov	0	0	0	0	0	0
O. sativa	CX32	GJ-adm	GJ-adm	1	1	0	1	0	nocov	1	0	0	0	0	0	1	nocov	0	1	0	0	nocov	0	0	0	0	1	0	1	nocov	1	0	nocov	0	1	1	1	0	1	0	0	0	nocov	1	0	1	0	0	1
O. sativa	CX330	GJ-tmp	GJ-temp	0	0	0	0	0	nocov	nocov	0	0	0	0	0	1	0	0	0	0	0	nocov	0	0	0	0	0	0	0	nocov	nocov	0	0	0	0	0	nocov	0	1	0	0	0	nocov	0	0	0	0	0	0
O. sativa	CX33	XI-1B	XI-1B2	1	1	1	0	1	1	1	1	1	1	1	1	1	nocov	1	1	1	1	1	1	1	1	1	1	1	1	1	1	1	1	1	1	1	1	1	0	0	nocov	1	1	1	1	1	1	1	1
O. sativa	CX340	XI-1B	XI-1B2	1	1	1	0	1	1	1	1	1	1	1	1	1	nocov	1	1	0	1	1	1	1	1	1	1	1	1	nocov	1	1	1	1	1	1	1	1	0	0	1	1	1	1	1	1	1	0	1
O. sativa	CX341	XI-adm	XI-1	1	1	1	0	1	1	1	1	1	1	1	1	1	nocov	1	1	1	1	1	1	1	1	1	1	1	1	1	1	1	1	0	1	1	1	1	0	1	1	1	nocov	1	nocov	1	1	1	1
O. sativa	CX342	XI-adm	XI-1	1	1	1	0	1	1	1	1	1	1	1	1	1	nocov	1	1	1	1	1	1	1	1	1	1	1	1	1	1	1	1	1	1	1	1	1	0	1	1	1	1	1	1	1	1	1	1
O. sativa	CX343	XI-adm	XI-1	1	1	1	0	1	1	1	1	1	1	1	1	1	1	1	1	0	1	1	1	1	1	nocov	0	1	1	1	1	1	1	1	1	1	1	1	1	1	1	1	1	1	0	1	1	1	0
O. sativa	CX344	GJ-tmp	GJ-temp	0	0	0	1	0	nocov	0	0	0	0	0	0	1	0	0	0	0	0	nocov	0	0	0	0	0	0	0	nocov	nocov	1	nocov	0	0	0	nocov	0	1	0	0	0	nocov	0	0	1	0	0	0
O. sativa	CX345	GJ-tmp	GJ-temp	0	0	0	1	0	nocov	0	0	0	0	0	0	1	0	0	0	0	0	nocov	0	0	0	0	0	0	0	nocov	0	1	nocov	0	0	0	nocov	0	1	0	nocov	0	nocov	0	0	1	nocov	0	0
O. sativa	CX346	XI-adm	XI-1	1	1	1	0	1	1	1	1	1	1	1	1	1	nocov	1	1	0	0	1	1	1	1	1	1	1	1	1	1	1	1	0	1	1	1	1	0	0	1	1	1	1	nocov	1	1	1	1
O. sativa	CX347	XI-adm	XI-1	1	1	1	0	1	1	1	1	1	1	1	1	1	nocov	1	1	1	1	1	1	1	0	1	1	1	1	1	1	1	1	0	1	1	1	1	0	0	1	1	1	1	1	1	0	1	1
O. sativa	CX348	XI-1B	XI-1B	1	1	1	0	1	1	1	1	1	1	1	1	1	1	1	1	1	0	1	1	1	1	1	1	1	1	1	1	1	1	1	1	1	1	1	0	0	1	1	1	1	nocov	1	1	1	1
O. sativa	CX349	XI-adm	XI-1	1	1	1	0	1	1	1	1	1	1	1	1	1	nocov	1	1	0	1	1	1	1	1	1	1	1	1	1	1	1	1	0	1	1	1	1	0	0	0	1	1	1	nocov	1	1	1	1
O. sativa	CX34	XI-adm	XI-adm	1	1	1	0	1	1	1	1	1	1	1	1	1	nocov	1	1	1	1	1	1	1	1	1	1	1	1	1	1	1	1	1	1	1	nocov	1	0	1	0	1	1	1	1	1	1	1	1
O. sativa	CX350	GJ-tmp	GJ-temp	0	0	0	1	0	nocov	0	0	0	0	0	0	1	1	0	0	0	0	nocov	0	0	0	nocov	1	0	0	nocov	nocov	0	1	0	0	1	nocov	1	1	0	0	1	nocov	0	0	1	0	0	0
O. sativa	CX351	GJ-tmp	GJ-temp	0	0	0	1	0	nocov	0	0	0	0	0	0	1	nocov	0	0	0	1	nocov	0	0	0	0	0	0	0	nocov	0	0	nocov	0	0	0	nocov	1	1	0	0	0	0	0	0	0	0	0	0
O. sativa	CX352	GJ-trp	GJ-trop1	0	0	0	0	0	nocov	1	0	0	0	0	0	1	nocov	1	0	0	1	1	0	0	0	0	0	0	0	nocov	1	0	nocov	0	0	0	nocov	0	1	0	0	0	nocov	1	nocov	1	0	0	0
O. sativa	CX353	GJ-adm	GJ-adm	0	0	0	1	0	nocov	0	0	0	0	1	0	1	nocov	0	0	0	1	nocov	1	0	0	0	1	0	0	nocov	nocov	1	nocov	0	nocov	0	nocov	0	1	0	0	0	nocov	1	0	0	0	0	0
O. sativa	CX354	GJ-adm	GJ-adm	0	0	nocov	1	0	nocov	0	0	0	0	0	0	1	nocov	0	0	0	0	nocov	0	0	0	0	0	0	1	nocov	1	1	nocov	0	0	0	nocov	0	1	0	0	1	nocov	0	0	0	0	0	0
O. sativa	CX355	GJ-trp	GJ-trop1	0	0	1	1	0	nocov	0	0	0	1	0	0	1	nocov	0	0	0	0	nocov	0	0	0	0	0	0	1	nocov	1	1	nocov	0	0	0	nocov	0	1	0	1	0	nocov	0	1	0	0	0	0
O. sativa	CX356	GJ-tmp	GJ-temp	0	0	0	1	0	nocov	0	0	0	0	0	0	1	0	0	0	0	0	nocov	0	0	0	0	0	0	0	nocov	nocov	0	nocov	0	0	0	nocov	0	1	0	0	0	nocov	0	0	0	0	0	0
O. sativa	CX357	XI-1B	XI-1B1	1	1	1	0	1	1	1	1	1	1	1	1	1	nocov	1	1	1	1	1	1	1	1	1	1	1	1	1	1	1	1	1	1	1	nocov	1	1	1	0	1	nocov	1	1	1	1	1	1
O. sativa	CX358	XI-1B	XI-1B1	1	1	1	0	1	1	1	1	1	1	1	1	1	nocov	1	1	1	1	1	1	1	1	1	1	1	1	1	1	1	1	1	1	1	nocov	1	0	1	1	1	1	1	1	1	1	1	1
O. sativa	CX359	GJ-trp	GJ-trop1	nocov	0	1	1	0	nocov	0	0	0	0	0	0	1	0	0	0	0	0	nocov	0	0	0	0	0	0	1	nocov	1	0	nocov	0	0	0	nocov	0	1	0	nocov	0	nocov	0	1	1	0	0	0
O. sativa	CX35	XI-adm	XI-1	1	1	1	0	1	1	1	1	1	1	1	1	1	nocov	1	1	0	1	1	1	1	1	1	1	1	1	1	1	1	1	1	1	1	1	1	0	1	1	1	1	1	1	1	1	1	1
O. sativa	CX360	XI-1B	XI-1B	1	1	1	0	1	1	1	1	1	1	1	1	1	nocov	1	1	0	1	1	1	1	1	1	1	1	1	1	1	1	1	1	1	1	nocov	1	0	1	1	1	nocov	1	1	1	1	1	1
O. sativa	CX361	XI-1B	XI-1B	1	1	1	0	1	1	1	1	1	1	1	1	1	nocov	1	1	0	1	1	1	1	1	1	1	1	1	1	1	1	1	0	1	1	nocov	1	0	0	0	1	1	1	nocov	1	1	1	1
O. sativa	CX362	XI-1B	XI-1B	1	1	1	0	1	1	1	1	1	1	1	1	1	nocov	1	1	0	1	1	0	1	1	0	1	1	1	1	1	1	nocov	1	1	1	1	1	0	1	1	1	1	1	nocov	1	1	1	1
O. sativa	CX363	XI-adm	XI-1B	1	1	1	1	1	1	1	1	1	1	1	1	1	1	1	1	0	0	1	1	1	1	1	1	1	1	1	1	1	1	1	1	1	1	1	0	1	1	1	1	1	1	1	1	1	1
O. sativa	CX364	XI-1B	XI-1B1	1	1	1	0	1	1	1	0	1	1	1	1	1	nocov	1	1	1	1	1	1	0	1	1	1	1	1	1	nocov	1	1	1	1	1	nocov	1	0	1	0	0	nocov	1	1	1	1	1	1
O. sativa	CX365	admix	admix	1	1	1	0	1	1	1	0	1	1	1	1	1	1	1	1	1	1	1	1	0	1	1	1	1	1	1	1	1	1	1	1	1	nocov	1	1	1	nocov	0	1	1	1	1	0	1	1
O. sativa	CX366	XI-adm	XI-1B	1	1	1	0	1	1	1	1	1	1	1	1	1	nocov	1	1	1	1	1	1	1	1	1	1	1	1	1	1	1	1	1	1	1	1	1	0	1	0	1	1	1	1	1	1	1	1
O. sativa	CX367	GJ-trp	GJ-trop1	nocov	1	1	1	1	1	1	1	1	0	0	nocov	1	nocov	1	1	1	0	1	1	1	1	0	0	0	0	nocov	1	1	nocov	0	0	0	nocov	0	1	0	0	1	nocov	1	1	0	0	0	0
O. sativa	CX368	cA(Aus)	cA1	1	1	1	0	1	1	1	1	1	0	nocov	nocov	1	nocov	1	1	1	0	1	1	1	1	0	0	0	0	nocov	1	1	nocov	0	0	0	nocov	nocov	0	0	0	1	nocov	1	1	1	1	0	1
O. sativa	CX369	XI-1B	XI-1B2	1	1	1	0	1	1	1	1	1	1	1	1	1	nocov	1	1	1	0	1	1	1	1	1	1	1	1	1	1	1	1	1	1	1	nocov	1	0	0	0	1	1	1	1	1	1	1	1
O. sativa	CX370	XI-1B	XI-1	1	1	1	0	1	1	1	1	1	1	1	1	1	nocov	1	1	1	1	1	1	1	1	1	1	1	1	1	1	1	1	1	0	1	nocov	1	0	0	1	1	1	1	1	1	1	1	1
O. sativa	CX371	GJ-trp	GJ-trop1	nocov	1	1	1	0	nocov	0	0	0	1	nocov	0	1	nocov	0	0	0	0	nocov	0	0	0	0	0	0	1	nocov	1	0	nocov	0	0	0	nocov	0	1	0	1	0	nocov	0	nocov	1	0	0	0
O. sativa	CX372	GJ-trp	GJ-trop1	nocov	1	nocov	1	0	nocov	nocov	0	0	1	0	0	1	nocov	0	0	0	0	nocov	0	0	0	0	0	0	1	nocov	1	1	nocov	0	1	0	nocov	0	1	1	1	0	nocov	0	1	1	0	0	0
O. sativa	CX373	GJ-trp	GJ-trop1	0	nocov	1	1	0	nocov	0	0	0	nocov	0	0	1	nocov	0	0	0	0	nocov	0	0	0	0	0	0	0	nocov	1	0	nocov	0	0	0	nocov	0	1	0	nocov	0	nocov	0	1	nocov	nocov	0	0
O. sativa	CX374	GJ-trp	GJ-trop1	0	1	1	1	0	nocov	nocov	0	0	nocov	0	0	1	nocov	0	0	0	0	nocov	0	0	0	0	0	0	0	nocov	1	1	nocov	0	0	0	nocov	0	1	0	nocov	0	nocov	0	1	0	0	0	0
O. sativa	CX375	XI-1B	XI-1B1	1	1	1	0	1	1	1	1	1	1	1	1	1	nocov	1	1	1	1	1	1	1	1	1	1	1	1	1	1	1	1	1	1	1	nocov	1	0	1	1	1	1	1	1	1	1	1	1
O. sativa	CX376	XI-1B	XI-1	1	1	1	0	1	1	1	1	1	1	1	1	1	nocov	1	1	0	1	1	1	1	1	1	1	1	1	nocov	1	1	1	1	1	1	1	1	0	1	0	1	1	1	1	1	1	1	1
O. sativa	CX377	XI-1B	XI-1B1	1	1	1	0	1	1	1	1	1	1	1	1	1	nocov	1	1	1	1	1	1	1	1	1	1	1	1	1	1	1	1	1	1	1	nocov	1	0	1	1	1	1	1	1	1	1	1	1
O. sativa	CX378	XI-1B	XI-1	1	1	1	0	1	1	1	1	1	1	1	1	1	1	1	1	1	0	1	1	1	1	1	1	1	1	1	1	1	1	1	1	1	nocov	1	0	0	0	1	1	1	1	1	1	1	1
O. sativa	CX379	XI-1B	XI-1B1	1	1	1	0	1	1	1	1	1	nocov	1	1	1	nocov	1	1	1	1	1	1	1	1	1	1	1	1	1	1	1	1	1	1	1	nocov	1	0	1	0	1	nocov	1	1	1	1	1	1
O. sativa	CX37	XI-1B	XI-1B1	1	1	1	0	1	1	1	1	1	1	1	1	1	nocov	1	1	1	1	1	1	1	1	1	1	1	1	1	1	1	1	1	1	1	1	1	0	1	1	1	1	1	1	1	1	1	1
O. sativa	CX380	GJ-tmp	GJ-temp	0	0	0	1	0	nocov	0	0	0	0	0	0	1	nocov	0	0	0	0	nocov	0	0	0	0	0	0	0	nocov	nocov	1	nocov	0	0	0	nocov	1	1	0	0	1	nocov	0	nocov	1	0	0	0
O. sativa	CX381	XI-1B	XI-1B1	1	1	1	0	1	1	1	1	1	nocov	1	1	1	nocov	1	1	1	1	1	1	1	1	1	1	1	1	1	1	1	1	1	1	1	nocov	1	0	1	0	0	nocov	1	1	1	1	1	1
O. sativa	CX382	XI-1B	XI-adm	1	1	1	0	1	1	1	1	1	1	1	1	1	nocov	1	1	0	1	1	1	1	1	1	1	1	1	1	1	1	1	1	1	1	nocov	1	0	0	0	1	1	1	1	1	1	1	1
O. sativa	CX383	GJ-tmp	GJ-temp	0	0	0	1	0	nocov	0	0	0	0	0	0	1	0	0	0	0	0	nocov	0	0	0	0	0	0	0	nocov	0	1	nocov	0	0	0	0	0	1	0	0	0	0	0	0	0	nocov	0	0
O. sativa	CX384	GJ-tmp	GJ-temp	0	nocov	nocov	1	0	nocov	nocov	0	0	0	0	0	1	nocov	0	0	0	0	nocov	0	0	0	0	0	0	0	nocov	0	1	nocov	0	0	0	nocov	0	1	0	0	0	nocov	nocov	0	0	nocov	0	0
O. sativa	CX385	XI-1B	XI-1B	1	1	1	0	1	1	1	1	1	1	1	1	1	nocov	1	1	1	1	1	1	1	1	1	1	1	1	1	1	1	1	1	1	1	1	1	0	1	1	1	1	1	1	1	1	1	1
O. sativa	CX386	XI-adm	XI-1	1	1	1	0	1	1	1	1	1	1	1	1	1	nocov	1	1	0	0	1	1	1	1	1	1	1	1	1	1	1	1	0	1	1	1	1	0	0	1	1	1	1	1	1	1	1	0
O. sativa	CX387	XI-1B	XI-1	1	1	1	0	1	1	1	1	1	1	1	1	1	nocov	1	1	1	1	1	1	1	1	1	1	1	1	1	1	1	1	1	1	1	1	1	0	0	0	1	1	1	1	1	1	1	1
O. sativa	CX388	XI-1B	XI-1B	1	1	1	0	1	1	1	1	1	1	1	1	1	nocov	1	1	1	0	1	1	1	1	1	1	1	1	1	1	1	1	1	1	1	1	1	0	0	1	1	nocov	1	1	1	1	1	1
O. sativa	CX389	GJ-tmp	GJ-temp	0	0	0	1	0	nocov	0	0	0	0	0	0	1	nocov	1	1	0	0	nocov	0	0	0	1	0	0	0	nocov	1	1	0	1	0	0	nocov	0	1	0	0	0	nocov	0	0	0	0	0	1
O. sativa	CX390	XI-adm	XI-adm	1	1	1	0	1	1	1	1	1	1	1	1	1	1	1	1	0	1	1	1	1	1	1	1	1	1	1	1	1	1	0	1	0	1	0	0	0	1	1	1	1	nocov	1	1	1	1
O. sativa	CX391	GJ-tmp	GJ-temp	0	0	0	1	0	nocov	0	0	0	0	0	0	1	nocov	0	0	0	0	nocov	0	0	0	0	0	0	0	nocov	0	1	0	0	0	0	nocov	0	1	0	0	0	nocov	0	0	1	0	0	0
O. sativa	CX392	XI-adm	XI-adm	1	1	1	0	1	1	1	1	1	1	1	1	1	1	1	1	0	1	1	1	1	1	1	1	1	1	1	1	1	1	1	1	1	1	1	0	1	0	1	1	1	1	1	1	1	1
O. sativa	CX393	XI-1B	XI-1	1	1	1	0	1	1	1	1	1	1	1	1	1	nocov	1	1	0	0	1	1	1	1	1	1	1	1	1	1	1	1	0	1	1	1	1	0	0	0	1	1	1	nocov	1	1	1	1
O. sativa	CX394	XI-1B	XI-1B	1	1	1	0	1	1	1	1	1	1	1	1	1	1	1	1	1	1	1	1	1	1	1	1	1	1	1	1	1	1	0	1	1	1	1	0	1	0	1	nocov	0	nocov	1	1	1	1
O. sativa	CX395	admix	admix	1	0	1	1	0	1	0	1	0	1	0	1	1	nocov	1	1	1	1	nocov	1	1	0	1	1	0	1	1	1	1	nocov	1	0	0	0	1	0	0	0	1	nocov	1	1	1	0	1	0
O. sativa	CX396	GJ-tmp	GJ-temp	0	0	0	1	0	nocov	0	0	0	0	0	0	1	nocov	0	0	0	0	nocov	0	0	0	0	0	0	0	nocov	0	0	nocov	0	0	0	nocov	0	1	0	0	0	0	0	0	0	0	0	0
O. sativa	CX397	GJ-tmp	GJ-temp	0	0	0	1	0	nocov	0	0	0	0	0	0	1	0	0	0	0	0	nocov	0	0	0	0	0	0	0	nocov	nocov	0	0	0	0	0	nocov	1	1	0	0	1	nocov	0	0	1	0	0	0
O. sativa	CX399	XI-1B	XI-1B1	1	1	1	0	1	1	1	1	1	1	1	1	1	0	1	1	1	1	1	1	1	1	1	1	1	1	1	1	1	1	1	1	1	1	1	0	1	1	1	nocov	0	1	1	1	0	1
O. sativa	CX3	XI-1A	XI-1A	1	1	1	0	1	1	1	1	1	1	1	1	1	1	1	1	1	1	1	1	1	1	1	1	1	1	1	1	1	1	1	0	1	1	1	0	0	1	1	1	1	nocov	1	1	1	1
O. sativa	CX400	admix	admix	0	1	1	1	1	1	0	1	1	1	1	0	1	1	1	1	1	0	nocov	1	1	1	1	1	0	1	1	1	1	1	1	1	1	nocov	1	1	1	1	1	1	1	1	1	1	1	1
O. sativa	CX401	XI-adm	XI-adm	1	1	1	0	1	1	1	1	1	1	1	1	1	0	1	1	0	1	1	1	1	1	1	1	1	1	1	1	1	1	1	1	1	1	1	0	1	1	1	1	1	1	1	1	1	1
O. sativa	CX402	admix	admix	0	1	0	0	0	0	1	0	0	0	nocov	0	0	0	0	1	0	0	nocov	nocov	0	1	nocov	1	0	0	nocov	1	0	0	0	0	0	nocov	0	0	1	0	0	nocov	0	0	0	0	0	nocov
O. sativa	CX403	XI-1B	XI-1B1	1	1	1	0	1	1	1	1	1	1	1	1	1	1	1	1	1	1	1	1	1	1	1	1	1	1	1	1	1	1	1	1	1	1	1	0	1	1	1	nocov	1	1	1	1	1	1
O. sativa	CX408	XI-1B	XI-1B2	1	1	1	0	1	1	1	1	1	1	1	1	1	1	1	1	1	0	1	1	1	1	1	1	1	1	1	1	1	1	1	1	1	1	1	0	0	0	1	1	1	1	1	1	1	1
O. sativa	CX409	XI-1B	XI-1B2	1	1	1	0	1	1	1	1	1	1	1	0	1	1	1	1	1	1	1	1	1	1	1	1	1	1	1	1	1	1	1	1	1	1	1	0	1	0	1	1	1	1	1	1	1	1
O. sativa	CX410	XI-1B	XI-1B2	1	1	1	0	1	1	1	1	1	1	1	1	1	1	1	1	1	1	1	1	1	1	1	1	1	1	1	1	1	1	1	1	1	1	1	0	0	0	1	1	1	1	1	1	1	1
O. sativa	CX411	XI-1B	XI-1B2	1	1	1	0	1	1	1	1	1	1	1	1	1	1	1	1	1	1	1	1	1	1	1	1	1	1	1	1	1	1	1	1	1	1	1	0	0	nocov	1	1	1	1	1	1	1	1
O. sativa	CX413	XI-1B	XI-1B2	1	1	1	0	1	1	1	1	1	1	1	1	1	1	1	1	1	1	1	1	1	1	1	1	1	1	1	1	1	1	1	1	1	1	1	0	0	0	1	1	1	1	1	1	1	1
O. sativa	CX414	XI-1B	XI-1B2	1	1	1	0	1	1	1	1	1	1	1	1	1	nocov	1	1	1	1	1	1	1	1	1	1	1	1	1	1	1	1	1	1	1	1	1	0	0	0	1	1	1	1	1	1	1	1
O. sativa	CX416	XI-1B	XI-1B2	1	1	1	0	1	1	1	1	1	1	1	1	1	1	1	1	1	1	1	1	1	1	1	1	1	1	1	1	1	1	1	1	1	1	1	0	0	nocov	1	1	1	1	1	1	1	1
O. sativa	CX417	XI-1B	XI-1B2	1	1	1	0	1	1	1	1	1	1	1	1	1	1	1	1	1	1	1	1	1	1	1	1	1	1	1	1	1	1	1	1	1	1	1	0	0	0	1	1	1	1	1	1	1	1
O. sativa	CX418	XI-1B	XI-1B2	1	1	1	0	1	1	1	1	1	1	1	1	1	1	1	1	1	1	1	1	1	1	1	1	1	1	1	1	1	1	1	1	1	1	1	0	0	0	1	1	1	1	1	1	1	1
O. sativa	CX419	XI-1B	XI-1B2	1	1	1	0	1	1	1	1	1	1	1	1	1	1	1	1	1	1	1	1	1	1	1	1	1	1	1	1	1	1	1	1	1	1	1	0	0	nocov	1	1	1	1	1	1	1	1
O. sativa	CX420	XI-1B	XI-1B2	1	1	1	0	1	1	1	1	1	1	1	1	1	1	1	1	1	1	1	1	1	1	1	1	1	1	1	1	1	1	1	1	1	1	1	0	0	0	1	1	1	1	1	1	1	1
O. sativa	CX421	XI-1B	XI-1B2	1	1	1	0	1	1	1	1	1	1	1	1	1	1	1	1	1	0	1	1	1	1	1	1	1	1	1	1	1	1	1	1	1	1	1	0	0	0	1	1	1	1	1	1	1	1
O. sativa	CX422	XI-1B	XI-1B2	1	1	1	0	1	1	1	1	1	1	1	1	1	1	1	1	1	1	1	1	1	1	1	1	1	1	1	1	1	1	1	0	1	1	1	0	0	0	1	1	1	1	1	1	1	1
O. sativa	CX423	XI-1B	XI-1B2	1	1	1	0	1	1	1	1	1	1	1	1	1	1	1	1	1	0	1	1	1	1	1	1	1	1	1	1	1	1	1	1	1	1	1	0	0	0	1	1	1	1	1	1	1	1
O. sativa	CX424	XI-1B	XI-1B2	1	1	1	0	1	1	1	1	1	1	1	1	1	nocov	1	1	1	0	1	1	1	1	1	1	1	1	1	1	1	1	1	1	1	1	1	0	0	0	1	1	1	1	1	1	1	1
O. sativa	CX425	XI-1B	XI-1B2	1	1	1	0	1	1	1	1	1	1	1	1	1	1	1	1	1	1	1	1	1	1	1	1	1	1	1	1	1	1	1	1	1	1	1	0	0	0	1	1	1	1	1	1	1	1
O. sativa	CX426	XI-1B	XI-1B2	1	1	1	0	1	1	1	1	1	1	1	1	1	nocov	1	1	0	1	1	1	1	1	1	1	1	0	nocov	1	1	1	1	1	1	1	1	0	0	1	1	1	1	1	1	1	0	1
O. sativa	CX427	GJ-tmp	GJ-temp	1	0	0	1	0	nocov	1	0	0	0	0	0	1	0	0	0	0	0	nocov	0	0	0	0	0	0	0	1	0	1	nocov	0	0	0	nocov	1	1	0	1	0	nocov	0	0	0	0	1	0
O. sativa	CX428	GJ-tmp	GJ-temp	nocov	0	0	1	0	nocov	0	0	0	0	0	0	1	nocov	0	0	0	0	nocov	0	0	0	0	0	0	0	nocov	0	1	nocov	0	0	0	nocov	0	1	0	0	0	nocov	0	0	0	0	0	0
O. sativa	CX429	GJ-tmp	GJ-temp	0	0	0	1	0	nocov	0	0	0	0	0	0	1	0	0	0	0	0	nocov	0	0	0	0	0	0	0	nocov	0	1	nocov	0	0	0	nocov	0	1	0	0	0	0	0	0	0	0	0	0
O. sativa	CX42	XI-adm	XI-1	1	1	1	0	1	1	1	1	1	1	1	1	1	nocov	1	1	0	0	1	1	1	1	1	1	1	1	1	1	1	1	0	1	1	1	1	0	0	1	1	1	1	nocov	1	1	1	1
O. sativa	CX431	XI-adm	XI-adm	1	1	1	0	1	1	1	1	1	1	1	1	1	nocov	1	1	1	1	1	1	1	1	1	1	1	1	1	1	1	1	1	1	1	1	1	0	1	1	1	1	1	1	1	1	1	1
O. sativa	CX43	XI-1B	XI-1B	1	1	nocov	0	1	nocov	1	1	1	1	1	1	1	nocov	1	1	0	1	1	1	1	1	1	1	1	1	1	1	1	nocov	1	1	1	1	1	0	0	0	1	1	1	1	1	1	1	1
O. sativa	CX44	XI-1B	XI-1B1	1	1	1	0	1	1	1	1	1	1	1	1	1	nocov	1	1	0	1	1	1	1	1	1	1	1	1	1	1	1	1	1	1	1	1	1	0	1	0	1	1	0	1	1	1	1	1
O. sativa	CX45	XI-1B	XI-1B	1	1	1	0	1	1	1	1	1	1	1	1	1	nocov	1	1	0	1	1	1	1	1	1	1	1	1	1	1	1	1	1	1	1	1	1	0	1	0	1	1	1	1	1	1	1	1
O. sativa	CX46	admix	admix	1	1	1	0	0	nocov	0	1	0	0	1	1	1	1	1	0	0	0	nocov	0	1	0	1	1	0	0	nocov	1	1	nocov	1	1	0	nocov	0	1	0	0	1	nocov	1	1	1	0	1	0
O. sativa	CX47	GJ-tmp	GJ-temp	0	0	0	1	0	nocov	0	0	0	0	nocov	0	1	nocov	0	0	0	0	nocov	0	0	0	nocov	0	0	0	nocov	0	0	nocov	0	0	0	nocov	0	1	0	nocov	0	nocov	0	nocov	1	0	0	0
O. sativa	CX48	XI-adm	XI-adm	1	1	1	0	1	1	1	1	1	1	1	1	1	1	1	1	1	1	1	1	1	1	1	1	1	1	1	1	1	1	1	1	1	1	1	0	1	1	1	1	1	1	1	1	1	1
O. sativa	CX49	GJ-tmp	GJ-temp	0	0	0	0	1	nocov	1	0	1	1	0	1	1	0	0	1	0	1	1	0	1	1	1	1	1	0	nocov	1	1	0	0	nocov	1	nocov	1	0	0	nocov	0	1	nocov	nocov	1	0	0	1
O. sativa	CX4	XI-adm	admix	1	1	1	1	1	1	1	0	1	1	1	1	1	1	1	1	1	1	1	1	1	1	1	1	1	1	1	0	1	1	1	1	1	1	1	1	1	1	0	1	1	1	1	1	1	1
O. sativa	CX50	XI-1B	XI-1B2	1	1	1	0	1	1	1	1	1	1	1	1	1	nocov	1	1	1	1	1	1	1	1	1	1	1	1	1	1	1	1	1	1	1	1	1	0	0	0	1	1	1	1	1	1	1	1
O. sativa	CX51	XI-adm	XI-adm	1	1	1	0	1	1	1	1	0	1	1	1	1	nocov	1	1	1	1	1	1	1	1	1	1	1	1	1	1	1	1	0	0	0	nocov	1	0	1	1	1	nocov	1	1	1	1	1	1
O. sativa	CX52	XI-adm	XI-adm	1	1	1	0	1	1	1	1	0	1	1	1	1	nocov	1	1	1	1	1	1	1	1	0	1	1	1	1	1	1	1	1	1	1	1	1	0	0	0	1	1	1	1	0	1	0	1
O. sativa	CX534	GJ-tmp	GJ-temp	0	0	0	1	0	0	0	0	0	0	0	0	1	0	0	0	0	1	nocov	0	0	0	0	0	0	0	nocov	nocov	0	0	0	0	0	nocov	0	1	0	0	0	nocov	0	0	1	0	0	0
O. sativa	CX53	XI-adm	XI-adm	1	1	1	0	1	1	1	1	1	1	1	1	1	1	1	1	0	1	1	0	1	1	1	1	1	1	1	1	1	1	1	1	1	1	1	0	1	0	1	1	1	1	1	1	1	1
O. sativa	CX542	XI-adm	XI-1	1	1	1	0	1	1	1	1	1	1	1	1	1	1	1	1	1	1	1	1	1	1	1	1	1	1	1	1	1	1	1	1	1	1	1	0	0	1	1	1	1	1	1	1	1	1
O. sativa	CX548	XI-adm	XI-1	1	1	1	0	1	1	1	1	1	0	1	1	1	nocov	1	1	1	1	1	1	1	1	1	1	1	1	1	1	1	1	1	1	1	1	1	0	0	1	1	1	0	1	1	1	1	1
O. sativa	CX54	XI-adm	XI-3B2	1	1	1	0	1	1	1	1	1	1	1	1	1	nocov	1	1	0	1	1	1	1	1	1	1	1	1	1	1	1	1	1	1	1	nocov	0	0	1	1	1	1	1	1	1	1	1	1
O. sativa	CX55	XI-1A	XI-1A	1	1	1	0	1	1	1	1	1	1	1	1	1	nocov	1	1	1	1	1	1	1	1	1	1	1	1	1	1	1	1	1	1	1	1	1	0	0	1	1	1	1	1	1	1	1	1
O. sativa	CX561	XI-1B	XI-1B1	1	1	1	0	1	1	1	1	1	1	1	1	1	nocov	1	1	1	1	1	1	1	1	1	1	1	1	1	1	1	1	1	1	1	1	1	0	1	1	1	nocov	1	0	1	1	1	1
O. sativa	CX56	GJ-tmp	GJ-temp	0	0	nocov	1	0	nocov	0	0	0	0	0	0	1	nocov	0	0	0	0	nocov	0	0	0	0	0	0	0	nocov	nocov	0	nocov	0	0	0	nocov	0	1	0	0	0	nocov	0	nocov	0	0	0	0
O. sativa	CX578	GJ-tmp	GJ-temp	1	0	0	1	0	nocov	0	0	0	0	0	1	1	0	0	0	0	1	nocov	0	0	0	0	0	0	1	nocov	nocov	1	nocov	0	0	0	nocov	0	1	0	0	0	0	0	0	1	0	1	0
O. sativa	CX579	admix	admix	1	0	0	1	0	nocov	0	0	0	0	0	1	1	0	0	0	0	1	nocov	0	0	0	0	0	0	1	1	nocov	0	0	0	0	0	nocov	0	0	0	0	0	nocov	0	0	1	0	1	0
O. sativa	CX57	GJ-tmp	GJ-temp	0	0	nocov	0	0	1	0	0	0	0	0	0	1	nocov	0	1	0	0	nocov	1	0	0	0	0	0	0	nocov	nocov	1	nocov	0	0	0	nocov	0	1	0	0	1	nocov	0	0	0	0	0	0
O. sativa	CX58	GJ-tmp	GJ-temp	0	0	0	1	0	nocov	nocov	0	0	0	0	0	1	nocov	0	0	0	0	nocov	0	0	0	0	0	0	0	nocov	0	1	nocov	0	0	0	nocov	0	1	0	0	0	nocov	0	nocov	0	0	0	0
O. sativa	CX59	cB(Bas)	cB	1	0	1	1	0	nocov	nocov	1	0	0	0	0	1	nocov	1	0	0	0	nocov	0	1	0	0	1	0	0	nocov	1	1	0	0	0	0	nocov	0	0	0	0	1	nocov	1	nocov	0	0	0	0
O. sativa	CX5	XI-adm	XI-1	1	1	1	0	0	1	1	1	1	1	1	1	1	nocov	1	1	0	1	1	1	1	0	1	1	0	1	1	1	1	nocov	1	1	1	nocov	1	0	0	nocov	nocov	1	1	1	1	1	1	0
O. sativa	CX60	XI-1B	XI-1B1	1	1	1	0	1	1	1	1	1	1	1	1	1	1	1	1	0	1	1	1	1	1	1	1	1	1	1	1	1	1	1	1	1	nocov	1	0	1	nocov	0	1	0	1	1	1	1	1
O. sativa	CX61	XI-1A	XI-3B	1	1	1	0	1	1	1	1	1	1	1	1	1	nocov	1	1	1	1	1	1	1	1	0	1	1	1	1	1	1	nocov	1	1	0	1	nocov	0	1	1	1	1	1	nocov	1	1	1	1
O. sativa	CX63	cA(Aus)	cA1	1	1	1	0	1	1	1	1	1	nocov	0	1	1	0	1	1	1	0	1	1	1	1	0	1	0	0	nocov	1	1	nocov	0	0	0	nocov	0	0	0	0	1	nocov	1	1	1	1	0	0
O. sativa	CX64	XI-3	XI-3A	1	0	1	1	1	1	1	1	1	1	1	1	1	1	1	1	0	1	nocov	1	1	1	1	1	1	1	1	1	1	1	1	1	1	1	1	0	1	0	1	1	1	1	1	0	1	1
O. sativa	CX65	cB(Bas)	cB	1	1	0	1	0	nocov	0	0	0	0	nocov	1	1	nocov	1	0	0	0	nocov	0	0	0	0	0	0	1	nocov	1	0	nocov	0	0	0	nocov	0	1	0	nocov	0	nocov	nocov	0	0	0	0	0
O. sativa	CX66	cB(Bas)	cB	1	1	1	1	0	nocov	0	nocov	0	0	0	0	1	0	1	0	0	0	nocov	0	0	0	0	0	0	1	nocov	1	1	0	0	0	0	nocov	0	1	0	0	0	nocov	nocov	0	0	0	0	0
O. sativa	CX67	cB(Bas)	cB	1	1	1	1	0	nocov	nocov	nocov	0	nocov	nocov	0	1	nocov	1	0	0	0	nocov	0	0	0	0	0	0	1	nocov	1	0	nocov	0	0	0	nocov	0	1	0	0	0	nocov	nocov	nocov	0	0	0	0
O. sativa	CX68	XI-adm	XI-adm	1	1	1	0	1	1	1	1	1	0	1	1	1	1	1	1	1	1	1	1	1	1	1	1	1	1	1	1	1	1	1	1	1	1	nocov	0	0	0	1	1	1	nocov	1	1	1	1
O. sativa	CX69	XI-adm	XI-adm	1	1	1	1	1	1	1	1	1	1	1	1	1	nocov	1	1	1	1	1	1	1	1	1	1	1	1	1	1	1	1	1	1	1	1	1	0	1	0	1	1	1	1	1	0	1	1
O. sativa	CX6	admix	admix	1	0	0	0	0	nocov	1	0	1	1	0	0	1	1	0	1	1	0	nocov	1	0	0	1	1	0	0	nocov	1	1	1	1	0	0	nocov	0	0	0	1	0	0	0	1	1	1	1	0
O. sativa	CX70	XI-adm	XI-adm	1	1	1	0	1	1	1	1	1	1	1	1	1	1	1	1	0	0	1	1	1	1	1	1	1	1	1	1	1	1	1	1	1	1	1	0	0	0	1	nocov	1	0	1	1	1	1
O. sativa	CX71	XI-3	XI-3B1	1	0	1	0	1	1	1	1	1	1	1	1	1	1	1	1	0	1	1	1	1	1	1	1	1	1	nocov	1	1	1	1	0	0	1	1	0	1	0	1	1	1	1	1	1	0	1
O. sativa	CX72	cB(Bas)	cB	1	1	0	0	0	nocov	1	0	0	0	0	1	1	1	1	0	0	0	1	0	0	0	0	1	0	0	nocov	1	1	0	0	0	1	nocov	0	0	0	0	0	nocov	1	0	1	nocov	0	0
O. sativa	CX73	XI-1B	XI-1B2	1	1	1	0	1	1	1	1	1	0	1	1	1	1	1	1	1	1	1	1	1	1	1	1	1	1	1	1	1	nocov	1	1	1	1	0	0	1	0	1	1	1	1	1	1	1	1
O. sativa	CX74	GJ-tmp	GJ-temp	0	0	0	1	0	nocov	0	0	0	0	0	nocov	1	nocov	0	0	0	0	nocov	0	0	0	0	0	0	0	nocov	0	0	nocov	0	0	0	nocov	0	1	0	0	nocov	nocov	0	0	0	0	0	0
O. sativa	CX75	XI-adm	XI-1B	1	1	1	0	1	1	1	1	1	0	1	1	1	nocov	1	1	1	1	1	1	1	1	1	1	1	1	1	1	1	1	1	1	1	1	1	0	1	0	0	1	0	1	1	1	1	1
O. sativa	CX76	XI-1B	XI-1B1	1	1	1	0	1	1	1	1	1	1	nocov	1	1	nocov	1	1	0	1	1	1	1	1	1	1	1	1	1	1	1	1	1	1	1	nocov	1	0	1	0	1	1	0	1	1	1	1	1
O. sativa	CX77	GJ-trp	GJ-trop1	nocov	0	0	0	0	1	0	0	0	1	0	0	1	nocov	0	0	0	0	1	0	0	0	0	0	0	1	nocov	1	0	nocov	0	0	0	nocov	0	1	0	1	0	nocov	1	0	1	0	0	0
O. sativa	CX78	GJ-tmp	GJ-temp	0	0	1	1	0	1	0	0	0	1	0	0	1	nocov	0	0	0	0	nocov	0	0	0	0	0	0	0	nocov	0	0	nocov	0	0	0	nocov	0	1	0	1	0	nocov	nocov	0	0	0	0	0
O. sativa	CX79	XI-1B	XI-1B	1	1	1	0	1	1	1	1	1	1	1	1	1	1	1	1	1	1	1	1	1	1	1	1	1	1	1	1	1	1	1	1	1	0	1	0	1	1	1	1	1	1	1	1	1	1
O. sativa	CX80	XI-1B	XI-1B	1	1	1	0	1	1	1	1	1	0	1	1	1	nocov	1	1	0	1	1	1	1	1	1	1	1	1	1	1	1	1	1	1	1	1	1	0	1	0	1	1	0	1	1	1	1	1
O. sativa	CX82	XI-1B	XI-1B	1	1	1	0	1	1	1	0	1	1	1	1	1	1	1	1	1	1	1	1	0	1	1	1	1	1	1	nocov	1	1	1	1	1	nocov	1	0	1	1	0	1	1	1	1	1	1	1
O. sativa	CX83	XI-1B	XI-1B1	1	1	1	0	1	1	1	1	1	1	1	1	1	nocov	1	1	1	1	1	1	1	1	1	1	1	1	1	1	1	1	1	0	1	1	1	0	1	1	1	nocov	1	1	1	1	1	1
O. sativa	CX84	XI-adm	XI-1B	1	1	1	0	1	1	1	1	1	1	1	1	1	nocov	1	1	1	1	1	1	1	1	1	1	1	1	1	1	1	1	1	0	1	1	1	0	0	1	1	1	1	1	1	1	1	1
O. sativa	CX85	XI-adm	XI-1B	1	1	1	0	1	1	1	1	1	1	1	1	1	1	1	1	1	1	1	1	1	1	1	1	1	1	1	1	1	1	1	1	1	1	1	0	1	0	1	nocov	1	1	1	1	0	1
O. sativa	CX86	XI-adm	XI-1	1	1	1	0	1	1	1	1	1	1	1	1	1	nocov	1	1	1	1	1	1	1	1	1	1	1	1	1	1	1	1	1	1	1	1	1	0	0	nocov	nocov	1	1	nocov	1	1	1	1
O. sativa	CX87	XI-adm	XI-1	1	1	1	0	1	1	1	1	1	1	1	1	1	nocov	1	1	0	1	1	1	1	1	1	1	1	1	1	1	1	1	0	1	1	1	1	0	0	0	1	nocov	1	nocov	1	1	1	1
O. sativa	CX88	XI-1A	XI-1A	1	1	1	0	1	1	1	1	1	1	1	1	1	nocov	1	1	1	1	1	1	1	1	1	1	1	1	1	1	1	1	0	0	0	1	1	0	0	1	1	1	1	1	1	1	1	1
O. sativa	CX89	XI-adm	XI-1	nocov	nocov	nocov	nocov	nocov	nocov	nocov	nocov	nocov	nocov	nocov	nocov	nocov	nocov	nocov	nocov	nocov	nocov	nocov	nocov	nocov	nocov	nocov	nocov	nocov	nocov	nocov	nocov	nocov	nocov	nocov	nocov	nocov	nocov	nocov	nocov	nocov	nocov	nocov	nocov	nocov	nocov	nocov	nocov	nocov	nocov
O. sativa	CX8	XI-adm	XI-adm	1	1	1	0	1	1	1	1	1	1	1	1	1	nocov	1	1	1	1	1	1	1	1	1	1	1	1	nocov	1	1	1	1	0	1	1	1	0	0	1	1	1	1	1	1	1	1	1
O. sativa	CX90	XI-1B	XI-1B2	1	1	1	0	1	1	1	1	1	1	1	1	1	nocov	1	1	1	0	1	1	1	0	1	1	0	1	1	1	1	nocov	1	1	1	1	0	0	0	1	1	1	1	1	1	0	1	1
O. sativa	CX91	XI-1B	XI-1B	1	0	1	0	1	1	1	0	1	1	1	1	1	nocov	1	1	0	1	1	1	0	1	0	1	1	1	1	nocov	1	1	1	1	1	nocov	1	0	0	0	0	1	1	1	1	1	1	1
O. sativa	CX92	XI-1B	XI-1B2	1	1	1	0	1	1	1	1	1	1	1	1	1	nocov	1	1	1	1	1	1	1	1	1	1	1	1	1	1	1	1	1	1	1	1	1	0	1	0	1	1	1	1	1	1	1	1
O. sativa	CX93	XI-adm	XI-1	nocov	nocov	nocov	nocov	nocov	nocov	nocov	nocov	nocov	nocov	nocov	nocov	nocov	nocov	nocov	nocov	nocov	nocov	nocov	nocov	nocov	nocov	nocov	nocov	nocov	nocov	nocov	nocov	nocov	nocov	nocov	nocov	nocov	nocov	nocov	nocov	nocov	nocov	nocov	nocov	nocov	nocov	nocov	nocov	nocov	nocov
O. sativa	CX94	XI-adm	XI-adm	1	1	1	0	1	1	1	1	1	1	1	1	1	nocov	1	1	1	1	1	1	1	1	1	1	1	1	1	1	1	1	1	1	1	nocov	0	0	0	1	1	1	1	0	0	nocov	1	1
O. sativa	CX96	XI-1B	XI-1B	nocov	nocov	nocov	nocov	nocov	nocov	nocov	nocov	nocov	nocov	nocov	nocov	nocov	nocov	nocov	nocov	nocov	nocov	nocov	nocov	nocov	nocov	nocov	nocov	nocov	nocov	nocov	nocov	nocov	nocov	nocov	nocov	nocov	nocov	nocov	nocov	nocov	nocov	nocov	nocov	nocov	nocov	nocov	nocov	nocov	nocov
O. sativa	CX97	XI-1B	XI-1B	1	1	1	0	1	1	1	1	1	nocov	1	1	1	1	1	1	1	1	1	1	1	1	1	1	1	1	1	1	1	1	1	1	1	1	1	0	0	0	1	1	1	1	0	0	1	1
O. sativa	CX98	XI-2	XI-2B	1	0	1	0	1	1	1	1	1	1	1	0	1	1	1	1	1	1	1	1	1	1	1	0	1	1	1	1	1	1	0	0	0	0	0	0	0	0	0	nocov	1	nocov	1	1	1	1
O. sativa	CX99	XI-2	XI-2B	1	1	1	0	1	1	1	1	1	1	nocov	0	1	1	1	1	1	0	1	1	1	1	1	0	1	1	1	1	1	1	0	1	1	1	0	0	0	1	1	nocov	1	1	1	1	1	1
O. sativa	CX9	XI-1B	XI-1B2	1	1	1	0	1	1	1	1	1	1	1	1	1	nocov	1	1	0	0	1	1	1	1	1	1	1	1	1	1	1	1	0	nocov	1	nocov	1	0	0	1	1	1	1	nocov	1	1	1	1
O. sativa	IRIS_313-10000	XI-1B	XI-1B	1	1	1	0	1	1	1	1	1	1	1	1	1	1	1	1	1	1	nocov	1	1	1	1	1	1	1	1	1	1	1	1	1	1	1	1	1	0	1	1	1	1	1	1	1	1	1
O. sativa	IRIS_313-10001	XI-1B	XI-1B1	1	1	1	0	1	1	1	1	1	1	1	1	1	1	1	1	1	1	1	1	1	1	1	1	1	1	1	1	1	1	1	1	1	1	1	0	1	0	1	nocov	1	1	1	1	1	1
O. sativa	IRIS_313-10002	XI-1B	XI-1B	1	nocov	1	0	1	1	1	1	1	1	1	1	1	1	1	1	1	1	1	1	1	1	1	1	1	1	1	1	1	1	0	1	1	1	1	0	1	nocov	1	nocov	0	1	1	1	1	1
O. sativa	IRIS_313-10007	XI-adm	XI-adm	1	1	1	0	1	1	1	1	1	1	1	1	1	1	1	1	1	1	1	1	1	1	1	1	1	1	1	1	1	1	1	1	1	1	1	0	0	1	1	nocov	1	0	0	1	1	1
O. sativa	IRIS_313-10010	XI-2	XI-2	1	1	1	0	1	1	1	1	1	1	1	1	1	1	1	1	1	1	1	1	1	1	1	1	1	1	1	1	1	1	1	1	1	1	1	0	0	1	1	nocov	1	nocov	1	1	0	1
O. sativa	IRIS_313-10014	GJ-tmp	GJ-temp	0	0	0	1	0	nocov	0	0	0	0	0	0	1	0	0	0	0	0	nocov	0	0	0	0	0	0	1	nocov	0	0	nocov	0	0	0	nocov	0	1	0	0	0	0	0	0	0	0	0	0
O. sativa	IRIS_313-10016	XI-adm	XI-1	1	1	1	0	1	1	1	1	1	1	1	1	1	1	1	1	0	1	1	1	1	1	1	1	1	1	1	1	1	1	1	1	1	1	1	0	0	0	1	1	1	0	1	1	1	1
O. sativa	IRIS_313-10020	cA(Aus)	cA2	1	1	1	0	1	1	0	1	0	0	nocov	nocov	1	0	1	1	1	0	nocov	0	1	0	0	0	0	0	nocov	nocov	1	0	0	0	0	0	0	0	nocov	0	1	0	1	1	0	0	0	0
O. sativa	IRIS_313-10025	admix	GJ-adm	0	1	0	1	0	nocov	0	0	0	0	0	0	nocov	0	1	0	0	0	0	0	0	0	0	0	0	0	nocov	nocov	0	0	0	nocov	0	nocov	0	1	0	0	0	0	nocov	0	0	0	0	0
O. sativa	IRIS_313-10026	XI-2	XI-2B	1	0	1	0	1	1	1	1	1	1	1	1	1	1	1	1	1	1	1	1	1	1	1	1	1	1	1	1	1	1	1	1	1	0	0	0	0	1	1	nocov	nocov	1	1	1	1	1
O. sativa	IRIS_313-10030	XI-2	XI-2B	1	0	1	0	1	1	1	1	1	1	1	1	1	1	1	1	1	1	1	1	1	1	1	1	1	1	1	1	1	1	1	1	0	nocov	0	0	0	1	1	nocov	1	1	0	1	1	1
O. sativa	IRIS_313-10032	cB(Bas)	cB	1	1	0	1	0	nocov	0	1	0	0	0	0	1	1	1	0	0	0	nocov	0	1	0	0	0	0	0	nocov	1	0	0	0	0	0	nocov	0	0	0	0	1	nocov	nocov	0	0	0	0	0
O. sativa	IRIS_313-10034	XI-adm	XI-3B2	1	1	1	0	1	1	1	1	1	1	1	1	1	1	1	1	0	1	1	1	1	1	1	1	1	1	1	1	1	1	1	1	0	1	1	0	1	1	1	1	0	1	1	1	1	1
O. sativa	IRIS_313-10035	XI-2	XI-2	1	0	0	0	0	nocov	1	0	1	1	1	1	1	1	1	1	1	1	1	1	0	1	0	1	0	0	1	1	1	1	1	0	1	1	0	0	0	1	0	0	1	1	1	1	1	0
O. sativa	IRIS_313-10040	XI-1B	XI-1B2	1	1	1	0	1	1	1	1	1	0	1	1	1	1	1	1	1	1	1	1	1	1	1	1	1	1	1	1	1	1	1	1	1	1	1	0	0	0	1	1	1	1	1	1	1	1
O. sativa	IRIS_313-10041	GJ-trp	GJ-trop1	0	0	0	1	0	nocov	0	0	0	1	0	0	1	0	0	0	0	0	nocov	0	0	0	0	0	0	1	nocov	1	1	nocov	0	0	0	nocov	0	1	0	1	0	nocov	1	0	1	0	0	0
O. sativa	IRIS_313-10045	XI-adm	XI-2	1	1	1	0	1	1	1	1	1	1	1	1	1	1	1	1	0	1	1	1	1	1	0	1	1	1	1	1	1	1	1	1	1	nocov	0	0	0	1	1	1	1	1	1	1	1	1
O. sativa	IRIS_313-10046	XI-1B	XI-1B	1	1	1	0	1	1	1	1	1	1	1	1	1	1	1	1	1	1	1	1	1	1	1	1	1	1	1	1	1	1	1	1	1	1	1	0	1	0	0	1	0	1	1	1	1	1
O. sativa	IRIS_313-10047	XI-1A	XI-1A	1	1	1	0	1	1	1	1	1	1	1	1	1	1	1	1	1	1	1	1	1	1	1	1	1	1	1	1	1	1	1	1	1	1	1	0	0	0	1	1	1	1	1	1	1	1
O. sativa	IRIS_313-10048	XI-adm	XI-adm	1	0	1	0	1	1	1	1	1	1	1	1	1	1	1	1	1	0	1	1	1	1	0	1	1	1	1	1	1	1	1	0	0	1	0	0	1	0	1	1	1	1	0	0	1	1
O. sativa	IRIS_313-10050	XI-adm	XI-adm	1	1	0	0	1	1	1	1	1	1	1	1	1	1	1	1	1	1	1	1	1	1	0	1	1	1	nocov	1	1	1	1	0	1	0	1	0	0	0	1	1	1	1	0	1	1	1
O. sativa	IRIS_313-10051	GJ-trp	GJ-trop1	0	0	0	1	0	1	0	0	0	0	0	0	1	0	0	0	0	0	nocov	0	0	0	0	0	0	0	nocov	1	0	nocov	0	0	0	nocov	0	1	0	0	0	nocov	0	0	1	0	0	0
O. sativa	IRIS_313-10054	XI-adm	XI-1B1	1	0	1	0	1	nocov	1	1	1	1	0	1	1	1	1	1	1	1	1	1	1	1	1	1	1	1	1	1	1	1	1	0	0	1	1	1	1	0	1	0	1	nocov	1	1	0	1
O. sativa	IRIS_313-10056	GJ-sbtrp	GJ-subtrp	0	0	0	1	0	nocov	0	0	0	0	0	0	1	0	0	1	0	0	nocov	0	0	0	0	0	0	0	nocov	nocov	1	nocov	0	0	0	nocov	0	1	0	0	0	nocov	0	0	0	0	0	0
O. sativa	IRIS_313-10057	GJ-tmp	GJ-temp	nocov	0	0	1	0	nocov	0	0	0	nocov	0	0	1	0	0	0	0	0	nocov	nocov	0	0	0	0	0	0	nocov	0	1	0	0	0	0	nocov	0	1	0	nocov	0	0	0	0	0	nocov	0	0
O. sativa	IRIS_313-10059	GJ-tmp	GJ-temp	0	0	0	1	0	nocov	0	0	0	0	0	0	1	nocov	0	0	0	0	nocov	0	0	0	0	0	0	0	nocov	nocov	0	0	0	0	0	0	0	1	0	0	0	0	0	0	1	0	0	0
O. sativa	IRIS_313-10061	GJ-adm	GJ-adm	0	0	0	1	0	nocov	0	0	0	1	nocov	0	1	0	0	1	0	0	0	1	0	0	0	0	0	1	nocov	nocov	0	nocov	0	0	0	nocov	0	1	nocov	1	0	nocov	0	0	1	0	0	0
O. sativa	IRIS_313-10062	GJ-trp	GJ-trop1	0	0	0	1	0	nocov	0	0	0	0	0	0	1	0	0	0	0	0	nocov	0	0	0	0	0	0	1	nocov	nocov	0	nocov	0	0	0	nocov	0	1	0	nocov	0	nocov	1	0	0	0	0	0
O. sativa	IRIS_313-10065	GJ-trp	GJ-trop1	nocov	1	1	1	0	nocov	0	0	0	0	1	0	1	1	0	0	0	0	0	0	0	0	0	0	0	1	nocov	nocov	0	nocov	0	0	0	nocov	0	1	0	0	0	nocov	0	0	0	nocov	0	0
O. sativa	IRIS_313-10067	GJ-trp	GJ-trop	0	1	1	1	0	nocov	0	0	0	0	1	0	1	1	0	0	0	0	nocov	0	0	0	0	0	0	1	nocov	nocov	0	nocov	0	0	0	nocov	0	0	0	0	0	0	0	0	0	0	0	0
O. sativa	IRIS_313-10071	GJ-trp	GJ-trop1	0	1	1	1	0	0	0	0	0	0	1	0	1	0	0	0	0	0	nocov	0	0	0	0	0	0	1	nocov	nocov	0	nocov	0	0	0	nocov	0	1	0	0	0	0	0	0	0	0	0	0
O. sativa	IRIS_313-10073	GJ-trp	GJ-trop1	0	1	1	1	0	nocov	nocov	0	0	0	1	0	1	1	0	0	0	0	0	0	0	0	0	0	0	1	nocov	nocov	0	nocov	0	0	0	nocov	0	1	0	0	0	0	0	0	0	nocov	0	0
O. sativa	IRIS_313-10074	GJ-trp	GJ-trop1	0	0	1	1	0	nocov	0	0	0	0	1	0	1	1	0	0	0	0	0	0	0	0	0	0	0	1	nocov	nocov	0	0	0	0	0	nocov	0	0	0	0	0	nocov	nocov	0	0	0	0	0
O. sativa	IRIS_313-10075	GJ-trp	GJ-trop1	nocov	1	1	1	0	nocov	0	0	0	0	1	0	1	1	0	0	0	0	nocov	0	0	0	0	0	0	1	nocov	nocov	0	nocov	0	0	0	nocov	0	1	0	0	0	0	0	0	0	0	0	0
O. sativa	IRIS_313-10076	GJ-trp	GJ-trop	0	1	1	1	0	nocov	0	0	0	0	1	0	1	1	0	0	0	0	nocov	0	0	0	0	0	0	1	nocov	nocov	0	nocov	0	nocov	0	nocov	0	0	0	nocov	0	nocov	0	0	0	nocov	0	0
O. sativa	IRIS_313-10077	XI-adm	XI-2A	1	1	1	0	1	1	1	1	1	1	1	1	1	1	1	1	0	1	1	1	1	1	1	1	1	1	1	1	1	1	0	1	1	nocov	1	0	1	1	1	nocov	1	1	1	1	1	1
O. sativa	IRIS_313-10078	GJ-trp	GJ-trop1	nocov	1	1	1	0	nocov	0	0	0	0	1	0	1	1	0	0	0	0	nocov	0	0	0	0	0	0	1	nocov	nocov	0	nocov	0	0	0	nocov	0	0	0	0	0	0	0	0	0	0	0	0
O. sativa	IRIS_313-10079	GJ-trp	GJ-trop	0	1	1	1	0	nocov	0	0	0	0	1	0	1	1	0	0	0	0	nocov	0	0	0	0	0	0	1	nocov	nocov	0	nocov	0	0	0	nocov	0	0	0	0	0	nocov	nocov	0	0	0	0	0
O. sativa	IRIS_313-10080	GJ-trp	GJ-trop1	0	1	1	1	0	nocov	0	0	0	0	1	0	1	1	0	0	0	0	nocov	0	0	0	0	0	0	1	nocov	nocov	0	nocov	0	0	0	nocov	0	1	0	0	0	0	0	0	0	0	0	0
O. sativa	IRIS_313-10082	GJ-trp	GJ-trop	0	0	1	1	0	0	0	0	0	0	1	0	1	nocov	0	0	0	0	nocov	0	0	0	0	0	0	1	0	nocov	0	nocov	0	0	0	nocov	0	1	0	0	0	0	nocov	nocov	0	0	0	0
O. sativa	IRIS_313-10083	GJ-tmp	GJ-temp	0	0	1	1	0	nocov	0	0	0	0	0	0	1	0	0	0	0	0	nocov	0	0	0	0	0	0	0	nocov	nocov	1	nocov	0	0	nocov	nocov	0	1	0	0	0	nocov	0	0	0	0	0	0
O. sativa	IRIS_313-10084	GJ-tmp	GJ-temp	0	0	0	1	0	1	0	0	0	0	0	0	1	0	0	0	0	0	nocov	0	0	0	0	0	0	0	nocov	0	0	nocov	0	0	0	nocov	0	1	0	0	0	nocov	0	0	0	0	0	0
O. sativa	IRIS_313-10089	GJ-tmp	GJ-temp	0	0	0	1	0	0	0	0	0	0	0	0	1	0	0	0	0	0	nocov	0	0	0	0	0	0	0	nocov	nocov	1	nocov	0	0	0	0	0	1	0	0	0	0	0	0	0	0	0	0
O. sativa	IRIS_313-10092	GJ-tmp	GJ-temp	0	0	0	1	0	nocov	0	0	0	0	nocov	0	1	0	0	0	0	0	nocov	0	0	0	0	0	0	0	nocov	nocov	1	nocov	0	0	0	nocov	0	1	0	0	0	nocov	nocov	0	0	0	0	0
O. sativa	IRIS_313-10093	GJ-tmp	GJ-temp	nocov	0	0	1	0	nocov	0	0	0	0	0	0	1	0	0	0	0	0	nocov	0	0	0	0	0	0	0	nocov	nocov	0	nocov	0	0	0	0	0	1	0	0	0	0	0	0	0	nocov	0	0
O. sativa	IRIS_313-10094	GJ-trp	GJ-trop1	0	1	1	1	0	nocov	0	0	0	0	1	0	1	1	0	0	0	0	nocov	0	0	0	0	0	0	1	nocov	nocov	0	nocov	0	0	0	nocov	0	0	0	0	0	nocov	0	0	0	0	0	0
O. sativa	IRIS_313-10096	GJ-adm	GJ-adm	0	1	1	1	0	0	0	0	0	0	1	0	1	1	0	0	0	0	nocov	0	0	0	0	0	0	1	0	nocov	0	nocov	0	0	0	nocov	0	0	0	0	0	nocov	0	0	0	0	0	0
O. sativa	IRIS_313-10097	GJ-tmp	GJ-temp	0	0	0	1	0	nocov	0	0	0	0	0	0	1	0	0	0	0	0	nocov	0	0	0	0	0	0	0	nocov	0	0	0	0	0	0	0	0	1	0	0	0	0	0	0	0	0	0	0
O. sativa	IRIS_313-10099	GJ-trp	GJ-trop1	0	0	0	1	1	nocov	0	0	0	1	0	0	1	nocov	0	0	0	0	nocov	0	0	0	0	0	0	0	nocov	1	0	nocov	0	0	0	nocov	0	1	0	1	0	nocov	nocov	0	0	0	0	0
O. sativa	IRIS_313-10102	XI-2	XI-2B	1	0	1	0	1	1	1	1	1	1	1	1	1	1	1	1	1	1	1	1	1	1	1	1	1	1	1	1	1	1	1	1	0	1	0	0	0	1	1	nocov	1	1	1	1	1	1
O. sativa	IRIS_313-10103	XI-adm	XI-3B	1	0	1	0	1	1	1	1	1	1	1	1	1	1	1	1	1	0	1	1	1	0	0	1	1	1	1	1	1	1	1	0	1	1	1	0	0	1	1	1	1	nocov	0	1	1	1
O. sativa	IRIS_313-10109	XI-3	XI-3A	1	1	1	0	1	1	1	1	1	1	1	1	1	1	0	1	0	1	1	1	1	1	1	1	1	1	1	1	1	1	1	1	1	0	0	0	1	0	1	1	1	nocov	1	1	1	1
O. sativa	IRIS_313-10111	GJ-adm	GJ-adm	0	0	1	1	0	nocov	0	0	0	0	0	0	1	0	0	0	0	0	nocov	0	0	0	0	0	0	1	nocov	nocov	1	nocov	0	0	0	nocov	0	0	0	0	0	0	0	0	0	0	0	0
O. sativa	IRIS_313-10113	XI-adm	XI-adm	1	1	1	1	1	1	1	1	1	1	1	1	1	1	1	1	0	1	1	1	1	1	1	1	1	1	1	1	1	1	1	1	1	1	1	0	1	0	1	1	1	1	1	0	1	1
O. sativa	IRIS_313-10114	XI-2	XI-2B	1	1	1	0	1	nocov	1	0	1	1	0	1	1	1	1	1	1	1	1	1	0	1	0	1	1	1	1	1	1	1	1	1	0	nocov	0	0	nocov	1	0	nocov	1	1	1	0	1	1
O. sativa	IRIS_313-10119	GJ-adm	GJ-adm	0	0	0	1	0	1	0	0	0	0	0	0	1	nocov	0	0	0	0	nocov	0	0	0	0	0	0	1	nocov	nocov	0	nocov	0	0	0	nocov	0	1	0	0	0	0	0	0	0	0	0	0
O. sativa	IRIS_313-10124	GJ-tmp	GJ-temp	0	0	0	1	0	1	1	0	0	0	0	0	1	0	0	0	0	0	0	0	0	0	0	0	0	0	nocov	nocov	0	nocov	0	0	0	nocov	0	1	0	0	0	nocov	0	0	0	0	0	0
O. sativa	IRIS_313-10129	XI-1A	XI-1A	1	0	1	0	1	1	1	1	1	1	1	1	1	1	1	1	1	1	1	1	1	1	1	1	1	1	1	1	1	1	1	0	1	1	1	0	0	1	1	1	1	1	1	1	1	1
O. sativa	IRIS_313-10134	XI-3	XI-3B1	1	1	1	0	1	1	1	1	1	1	1	1	1	1	1	1	0	1	1	1	1	1	1	1	1	1	1	1	1	1	1	1	1	1	1	0	1	1	1	1	1	1	1	1	1	1
O. sativa	IRIS_313-10147	XI-3	XI-3B1	1	1	1	0	1	1	1	1	1	1	1	1	1	1	1	1	0	1	1	1	1	1	1	1	1	1	1	1	1	1	1	1	0	1	1	0	1	0	1	1	1	1	1	1	1	1
O. sativa	IRIS_313-10148	XI-adm	XI-1	1	1	1	0	1	1	1	1	1	1	1	1	1	1	1	1	1	1	1	1	1	1	1	1	1	1	1	1	1	1	1	1	1	1	1	0	1	0	1	1	0	1	1	1	1	1
O. sativa	IRIS_313-10150	cA(Aus)	cA1	1	1	1	0	1	1	1	1	1	nocov	1	1	1	1	1	1	1	0	1	1	1	1	0	0	0	0	nocov	1	1	0	0	0	nocov	1	nocov	0	1	nocov	0	nocov	1	1	1	1	0	1
O. sativa	IRIS_313-10151	XI-3	XI-3B1	1	0	1	0	1	1	1	1	1	1	1	1	1	1	1	1	0	1	1	1	1	1	1	1	1	1	1	1	1	1	1	0	0	nocov	1	0	1	nocov	1	1	1	1	1	1	1	1
O. sativa	IRIS_313-10152	GJ-trp	GJ-trop1	0	0	0	1	0	1	0	0	0	1	0	0	1	0	0	0	0	0	nocov	0	0	0	0	0	0	1	nocov	1	0	nocov	0	0	0	nocov	0	1	0	1	0	0	1	0	0	0	0	0
O. sativa	IRIS_313-10154	XI-1A	XI-1A	1	1	1	0	1	1	1	1	1	1	1	1	1	1	1	1	1	1	1	1	1	1	1	1	1	1	1	1	1	1	1	1	1	1	1	0	0	1	1	1	1	1	1	1	1	1
O. sativa	IRIS_313-10158	XI-adm	XI-adm	1	1	0	0	1	1	1	1	1	1	0	1	1	0	1	0	1	1	1	1	1	1	1	1	1	1	1	1	1	1	1	1	1	1	1	0	1	0	1	1	1	1	1	1	1	1
O. sativa	IRIS_313-10161	XI-1B	XI-1B2	1	1	1	0	1	0	1	1	1	0	1	1	1	1	1	1	1	1	1	1	1	1	1	1	1	1	1	1	1	nocov	1	1	1	1	1	0	1	0	1	1	1	1	1	1	1	1
O. sativa	IRIS_313-10164	GJ-tmp	GJ-temp	0	0	0	1	0	nocov	0	0	0	0	0	0	1	nocov	0	0	0	0	nocov	0	nocov	0	nocov	0	0	0	nocov	nocov	0	nocov	0	0	0	nocov	0	1	0	0	0	nocov	nocov	0	0	0	0	0
O. sativa	IRIS_313-10167	XI-adm	XI-1B1	1	1	1	0	1	1	1	1	1	1	0	1	1	1	1	1	0	1	1	1	1	1	1	1	1	1	1	1	1	1	1	1	1	1	1	0	1	0	1	1	0	nocov	1	1	1	1
O. sativa	IRIS_313-10168	XI-adm	XI-adm	1	1	1	0	1	1	1	1	1	1	1	1	1	1	1	1	1	1	1	1	1	1	1	1	1	1	1	1	1	1	1	1	1	1	1	0	0	1	1	1	1	1	1	1	0	1
O. sativa	IRIS_313-10170	XI-1A	XI-1A	1	1	1	0	1	1	1	1	1	1	1	1	1	1	1	1	1	1	1	1	1	1	1	1	1	1	nocov	1	1	1	1	1	1	1	1	0	0	1	1	1	1	1	1	1	1	1
O. sativa	IRIS_313-10171	XI-1A	XI-1A	1	1	1	0	1	nocov	0	1	1	1	1	1	1	1	1	1	1	1	1	1	1	1	1	1	1	1	1	1	1	1	1	1	0	1	1	0	0	1	1	1	1	1	1	1	1	1
O. sativa	IRIS_313-10176	GJ-sbtrp	GJ-subtrp	0	1	0	1	0	nocov	0	0	0	0	0	0	1	0	0	0	0	0	nocov	0	0	0	0	0	0	0	nocov	1	0	nocov	0	0	0	nocov	0	1	0	0	1	0	0	0	0	0	0	0
O. sativa	IRIS_313-10177	XI-adm	XI-3B2	1	1	1	0	1	1	1	1	1	1	1	1	1	1	1	1	1	1	1	1	1	1	1	1	1	1	1	1	1	1	1	1	1	1	1	0	1	1	1	1	1	1	1	1	1	1
O. sativa	IRIS_313-10178	XI-1A	XI-1A	1	1	1	0	1	1	1	1	1	1	1	1	1	1	1	1	1	1	1	1	1	1	1	1	1	1	nocov	1	1	1	0	0	0	1	nocov	0	0	1	1	1	1	1	1	1	1	1
O. sativa	IRIS_313-10179	XI-adm	XI-3B2	1	1	1	0	1	1	1	1	1	1	1	1	1	1	1	1	0	1	1	1	1	1	1	1	1	1	1	1	1	1	1	1	0	1	1	0	1	1	1	1	0	1	1	1	1	1
O. sativa	IRIS_313-10189	XI-1A	XI-1A	1	0	1	0	1	1	1	1	1	1	1	1	1	1	1	1	1	0	1	1	1	1	1	1	1	1	nocov	1	1	1	1	1	0	1	1	0	0	1	1	1	1	1	1	1	1	1
O. sativa	IRIS_313-10190	XI-1A	XI-1A	1	1	1	0	1	1	1	1	1	1	1	1	1	1	1	1	1	1	1	1	1	1	1	1	1	1	nocov	1	1	1	1	0	1	1	1	0	0	0	1	1	1	1	1	1	1	1
O. sativa	IRIS_313-10191	XI-1A	XI-1A	1	1	1	0	1	1	1	1	1	1	1	1	1	1	1	1	1	1	1	1	1	1	1	1	1	1	1	1	1	1	0	0	1	1	1	0	1	0	1	nocov	1	nocov	1	1	1	1
O. sativa	IRIS_313-10196	GJ-trp	GJ-trop1	1	0	0	1	0	nocov	0	0	0	1	0	0	1	nocov	0	0	0	0	nocov	0	0	0	nocov	0	0	1	nocov	1	0	nocov	0	0	0	nocov	0	1	0	0	0	0	1	0	1	0	0	0
O. sativa	IRIS_313-10211	XI-1A	XI-1A	1	1	1	0	1	1	1	1	1	1	1	1	1	1	1	1	1	1	1	1	1	1	1	1	1	1	1	1	1	1	1	1	1	1	1	0	0	1	1	1	1	1	1	1	1	1
O. sativa	IRIS_313-10220	XI-adm	XI-1	1	1	1	0	1	1	1	1	1	0	1	1	1	1	1	1	0	1	1	1	1	1	1	1	1	1	1	1	1	1	1	1	1	1	1	0	1	0	1	1	1	1	1	1	1	1
O. sativa	IRIS_313-10221	XI-adm	XI-3B2	1	1	1	0	1	1	1	1	1	1	1	1	1	1	1	1	0	1	1	1	1	1	1	1	1	1	1	1	1	1	1	1	1	nocov	1	0	1	0	1	1	1	nocov	1	1	1	1
O. sativa	IRIS_313-10224	XI-1A	XI-1A	1	1	1	0	1	nocov	1	1	1	1	1	1	1	1	1	1	1	1	1	1	1	1	1	1	1	1	1	1	1	1	0	1	1	1	nocov	0	0	0	1	1	1	1	1	1	1	1
O. sativa	IRIS_313-10226	XI-adm	XI-3B2	1	0	1	0	1	1	1	1	1	1	1	1	1	1	1	1	0	1	1	0	1	1	1	1	1	1	1	1	1	1	0	1	0	1	1	0	1	1	1	1	1	1	1	1	1	1
O. sativa	IRIS_313-10228	GJ-tmp	GJ-temp	0	0	1	1	0	nocov	0	0	0	0	nocov	0	nocov	1	0	1	0	0	0	0	0	0	0	0	0	1	0	nocov	0	nocov	0	0	0	0	0	1	0	0	0	0	nocov	0	0	nocov	0	0
O. sativa	IRIS_313-10234	XI-1B	XI-1B1	1	0	1	0	1	1	1	1	1	1	1	1	1	1	0	1	1	1	1	1	1	1	1	1	1	1	1	1	1	1	1	1	1	1	1	0	1	1	1	nocov	1	1	1	0	1	1
O. sativa	IRIS_313-10235	XI-adm	XI-adm	1	0	1	0	1	1	1	1	1	1	1	1	1	1	1	1	1	1	1	1	1	1	1	1	1	1	1	1	1	1	1	1	1	1	1	0	1	0	0	1	1	1	1	1	1	1
O. sativa	IRIS_313-10237	XI-1B	XI-1B1	1	0	1	0	1	1	1	1	1	1	1	1	1	1	0	1	1	1	1	1	1	1	1	1	1	1	1	1	1	1	1	1	1	1	1	0	1	1	1	1	1	1	1	1	1	1
O. sativa	IRIS_313-10238	XI-1B	XI-1B1	1	0	1	0	1	1	1	1	1	1	1	1	1	1	0	1	1	1	1	1	1	1	1	1	1	1	1	1	1	1	1	1	1	1	1	0	1	1	1	1	1	1	1	1	1	1
O. sativa	IRIS_313-10239	XI-adm	XI-3B2	1	1	1	0	1	1	1	1	1	1	1	1	1	1	1	1	0	1	1	1	1	1	1	1	1	1	1	1	1	nocov	0	1	0	1	1	0	1	0	1	nocov	1	nocov	1	1	1	1
O. sativa	IRIS_313-10242	GJ-tmp	GJ-temp	0	0	0	1	0	nocov	0	0	0	0	0	0	1	0	0	0	0	0	nocov	0	0	0	0	0	0	1	nocov	0	0	nocov	0	0	0	nocov	0	1	0	0	0	nocov	nocov	0	0	0	0	0
O. sativa	IRIS_313-10247	XI-1B	XI-1B2	1	1	1	0	1	1	1	1	1	1	1	1	1	1	1	1	0	1	1	1	1	1	1	1	1	1	1	1	1	1	1	1	1	1	1	0	0	nocov	1	1	1	1	1	1	1	1
O. sativa	IRIS_313-10257	XI-adm	XI-adm	1	1	1	0	1	1	1	1	1	1	1	1	1	1	1	1	0	1	1	1	1	1	1	1	1	1	1	1	1	nocov	1	1	0	1	0	0	1	0	1	0	1	nocov	1	1	1	1
O. sativa	IRIS_313-10258	GJ-tmp	GJ-temp	0	nocov	0	1	0	nocov	0	0	0	1	0	0	1	0	0	0	0	0	nocov	0	0	0	0	0	0	1	nocov	0	0	nocov	0	0	0	nocov	0	1	0	0	0	0	0	0	0	0	0	0
O. sativa	IRIS_313-10260	XI-adm	XI-1	1	1	1	0	1	1	1	1	1	0	1	1	1	1	1	1	0	1	1	1	1	1	1	1	1	1	1	1	1	1	1	1	1	1	1	0	1	0	1	1	1	1	1	1	1	1
O. sativa	IRIS_313-10263	XI-adm	XI-adm	1	0	1	0	1	nocov	1	1	1	1	nocov	1	1	1	1	1	1	1	1	1	1	1	1	1	1	1	1	1	1	nocov	1	0	1	1	1	0	1	0	1	1	1	nocov	1	1	1	0
O. sativa	IRIS_313-10268	XI-adm	XI-1B	1	0	1	0	1	nocov	1	1	1	0	0	0	1	1	1	1	1	1	1	1	1	1	1	1	1	1	1	1	1	1	1	1	0	1	1	1	0	0	1	1	0	1	1	1	0	0
O. sativa	IRIS_313-10271	XI-adm	XI-adm	1	1	1	0	1	1	1	1	1	1	1	1	1	1	1	1	0	1	1	1	1	1	1	1	1	1	nocov	1	1	1	1	1	0	1	1	0	1	0	1	1	1	0	1	1	1	1
O. sativa	IRIS_313-10272	GJ-adm	GJ-adm	nocov	0	0	1	0	nocov	0	0	0	1	0	0	1	0	0	0	0	0	nocov	0	0	0	0	0	0	1	nocov	1	0	nocov	1	0	0	nocov	0	1	0	1	0	0	1	0	1	0	0	0
O. sativa	IRIS_313-10274	XI-1B	XI-1B2	1	1	1	0	1	1	1	1	1	1	1	1	1	1	1	1	1	1	1	1	1	1	1	1	1	1	1	1	1	1	1	1	1	1	1	0	0	nocov	nocov	1	0	1	1	1	1	1
O. sativa	IRIS_313-10275	XI-adm	XI-1	1	1	1	0	1	1	1	1	1	nocov	1	1	1	1	1	1	1	1	1	1	1	1	1	1	1	1	1	1	1	nocov	1	1	0	1	1	0	1	0	1	1	1	1	1	1	1	1
O. sativa	IRIS_313-10279	XI-adm	XI-adm	1	1	1	0	1	1	1	1	1	1	1	1	1	1	1	1	0	1	1	1	1	1	1	1	1	1	1	1	1	1	1	1	1	1	1	0	1	0	1	1	1	1	1	1	1	1
O. sativa	IRIS_313-10285	XI-adm	XI-adm	1	1	1	0	1	1	1	1	1	1	1	0	1	1	1	1	0	1	1	nocov	1	1	nocov	0	1	1	1	1	1	1	0	1	1	1	1	0	1	1	1	1	1	1	1	1	1	1
O. sativa	IRIS_313-10287	XI-1B	XI-1B	1	1	1	0	0	1	0	1	1	nocov	0	1	1	1	1	1	0	1	1	1	1	1	nocov	1	1	1	1	1	1	1	1	1	1	0	0	0	0	0	1	1	1	0	1	1	1	1
O. sativa	IRIS_313-10289	XI-1B	XI-1B	1	1	1	0	1	0	1	1	1	1	1	1	1	1	1	1	1	1	1	1	1	1	1	1	1	1	1	1	1	1	1	1	1	1	1	0	0	0	1	1	1	1	1	1	1	1
O. sativa	IRIS_313-10290	XI-1B	XI-1B1	1	1	1	0	1	1	1	1	1	1	1	1	1	1	1	1	1	1	1	1	1	1	1	1	1	1	1	1	1	1	1	1	1	1	1	0	0	0	0	1	1	nocov	1	1	0	1
O. sativa	IRIS_313-10293	XI-1B	XI-1B2	1	1	1	0	1	1	1	1	1	1	1	1	1	1	1	1	0	0	1	1	1	1	1	1	1	1	1	1	1	1	1	1	1	1	1	0	1	0	1	1	1	1	1	1	1	1
O. sativa	IRIS_313-10294	XI-adm	XI-1B1	1	1	1	0	1	1	1	1	1	1	0	1	1	nocov	1	1	1	1	1	1	1	1	1	1	1	1	1	1	1	1	1	1	1	1	1	0	1	0	1	nocov	nocov	nocov	1	1	1	1
O. sativa	IRIS_313-10295	admix	GJ-adm	0	1	0	1	0	nocov	0	0	0	0	0	0	1	0	1	0	0	0	nocov	0	0	0	0	0	0	0	nocov	nocov	0	0	0	0	0	nocov	0	1	0	0	0	nocov	nocov	0	0	0	0	0
O. sativa	IRIS_313-10298	XI-1B	XI-1B	1	1	1	0	1	1	1	1	1	0	1	1	1	1	1	1	1	1	1	1	1	1	1	1	1	1	1	1	1	1	1	1	1	1	1	0	0	0	1	nocov	1	1	1	1	1	1
O. sativa	IRIS_313-10300	XI-adm	XI-adm	1	1	0	0	1	nocov	1	1	1	1	1	1	1	nocov	1	1	0	1	1	1	1	0	0	1	1	1	1	1	1	1	1	1	0	1	1	0	1	0	1	1	1	1	1	1	1	0
O. sativa	IRIS_313-10301	XI-adm	XI-1B	1	1	1	0	0	1	1	0	1	0	1	1	1	1	1	1	0	1	1	1	1	0	1	1	0	1	1	1	1	1	1	1	1	1	0	0	1	0	1	1	1	1	1	1	1	1
O. sativa	IRIS_313-10307	XI-adm	XI-1	1	1	1	0	1	1	1	1	1	0	1	1	1	1	1	1	0	1	1	1	1	1	1	1	1	1	1	1	1	1	1	1	1	1	1	0	1	0	1	1	1	1	1	1	1	1
O. sativa	IRIS_313-10314	XI-adm	XI-1	1	1	1	0	1	1	1	1	1	1	1	1	1	1	1	1	1	1	1	1	1	1	1	1	1	1	1	1	1	1	1	1	0	1	1	0	1	0	1	0	1	1	1	1	1	1
O. sativa	IRIS_313-10318	XI-adm	XI-adm	0	1	1	0	1	1	1	1	1	1	1	1	1	1	1	0	0	1	nocov	1	1	0	1	1	0	1	nocov	1	1	nocov	1	1	0	1	1	0	1	0	0	1	1	1	1	1	0	1
O. sativa	IRIS_313-10325	XI-adm	XI-adm	1	1	1	0	1	1	1	1	1	1	1	1	1	1	1	1	0	0	1	1	1	1	1	1	1	1	1	1	1	1	1	1	0	1	1	0	1	0	1	1	1	1	1	1	1	1
O. sativa	IRIS_313-10327	GJ-trp	GJ-trop1	0	0	1	1	0	1	0	0	0	1	0	0	1	0	0	0	0	0	0	0	0	0	0	0	0	0	nocov	1	1	nocov	0	0	0	nocov	0	1	0	1	0	nocov	0	0	0	0	0	0
O. sativa	IRIS_313-10332	XI-adm	XI-adm	1	1	1	0	1	1	1	1	1	0	1	1	1	1	1	1	0	1	1	1	1	1	1	1	1	1	1	1	1	1	1	1	0	1	nocov	0	1	0	0	1	1	1	1	1	1	1
O. sativa	IRIS_313-10333	XI-1B	XI-1B	1	1	0	0	1	1	1	1	1	1	0	1	1	1	1	0	0	1	1	1	1	1	1	1	1	1	1	1	1	1	1	1	1	1	1	0	1	0	1	1	1	1	1	1	1	1
O. sativa	IRIS_313-10334	XI-1B	XI-1B	1	1	0	0	1	1	1	1	1	1	nocov	1	1	1	1	0	0	1	1	1	1	1	1	1	1	1	1	1	1	1	1	1	1	1	1	0	1	nocov	1	nocov	1	1	1	1	1	1
O. sativa	IRIS_313-10336	GJ-trp	GJ-trop1	0	1	1	1	0	1	nocov	0	0	0	0	0	1	0	0	0	0	0	nocov	0	0	0	0	0	0	0	nocov	1	1	nocov	0	0	0	nocov	0	1	0	0	0	0	nocov	1	0	0	0	0
O. sativa	IRIS_313-10337	XI-adm	XI-3	1	1	1	0	1	1	1	1	1	1	1	1	1	1	1	1	1	1	1	1	1	1	1	1	1	1	1	1	1	1	1	1	1	1	0	0	0	0	1	1	1	1	1	0	1	1
O. sativa	IRIS_313-10340	XI-adm	XI-adm	1	1	1	0	1	1	1	1	1	1	1	1	1	1	1	1	1	1	1	1	1	1	1	1	1	1	1	1	1	1	1	1	1	1	1	0	1	1	0	1	1	1	1	1	1	1
O. sativa	IRIS_313-10341	XI-adm	XI-adm	1	1	1	0	1	1	1	1	1	0	1	0	1	1	1	1	1	1	1	1	1	1	0	1	0	1	1	1	1	1	1	1	nocov	1	nocov	0	1	0	0	1	1	1	1	1	1	1
O. sativa	IRIS_313-10348	XI-adm	XI-adm	1	0	1	0	1	1	1	1	1	1	1	1	1	1	1	1	0	1	1	1	1	1	1	0	1	1	1	1	1	1	1	1	1	1	1	0	1	nocov	1	0	1	1	1	1	1	1
O. sativa	IRIS_313-10349	XI-adm	XI-adm	1	0	1	0	1	1	1	1	1	1	1	1	1	1	1	1	1	1	1	1	1	1	0	1	1	1	1	1	1	1	1	1	1	1	1	0	1	1	1	1	1	1	1	1	1	1
O. sativa	IRIS_313-10352	XI-adm	XI-adm	1	0	1	0	1	1	1	1	1	nocov	0	1	1	1	1	1	0	1	1	1	1	1	1	1	1	1	1	1	1	1	1	1	1	1	1	0	1	0	1	nocov	1	nocov	1	1	1	1
O. sativa	IRIS_313-10353	XI-adm	XI-1	1	1	1	0	1	1	1	1	1	0	1	1	1	0	1	1	1	1	1	1	1	1	1	1	1	1	nocov	1	1	1	1	1	1	0	0	0	0	0	1	nocov	1	1	1	1	1	1
O. sativa	IRIS_313-10355	XI-adm	XI-1B	1	1	1	0	1	1	1	1	1	1	nocov	1	1	1	1	1	0	1	1	1	1	1	1	1	1	1	1	1	1	1	1	1	1	1	1	0	nocov	0	1	1	1	0	1	1	1	1
O. sativa	IRIS_313-10357	XI-adm	XI-1B1	1	1	0	0	1	1	1	1	1	1	1	1	1	1	1	1	0	1	1	1	1	1	0	1	1	1	1	1	1	1	1	1	1	nocov	nocov	0	1	1	1	nocov	1	1	1	1	1	1
O. sativa	IRIS_313-10359	XI-adm	XI-adm	1	1	1	0	1	1	1	1	1	1	1	nocov	1	1	1	1	0	1	1	1	1	1	1	1	1	1	1	1	1	0	0	1	1	0	1	0	1	0	0	nocov	1	1	1	1	1	1
O. sativa	IRIS_313-10360	XI-adm	XI-adm	1	0	1	0	1	1	1	1	1	1	1	1	1	1	1	1	1	1	1	1	1	1	1	1	1	1	1	1	1	1	1	1	1	1	nocov	0	1	0	0	1	1	1	1	1	1	1
O. sativa	IRIS_313-10361	XI-adm	XI-1	1	1	1	0	1	nocov	1	1	1	1	1	1	1	0	1	1	1	1	1	1	1	1	1	1	1	1	1	1	1	1	1	1	1	1	nocov	0	1	1	1	1	1	1	1	1	1	1
O. sativa	IRIS_313-10366	XI-adm	XI-1B	1	1	1	0	1	1	1	1	1	1	nocov	1	1	1	1	1	1	1	1	1	1	0	1	1	0	1	1	1	1	1	1	1	1	1	1	0	1	0	0	nocov	1	nocov	1	1	1	1
O. sativa	IRIS_313-10371	XI-adm	XI-1	1	1	1	0	1	1	1	1	1	1	nocov	1	1	1	1	1	0	1	1	1	1	1	1	1	1	0	nocov	1	1	0	0	1	1	0	1	0	0	0	0	nocov	1	0	1	1	0	1
O. sativa	IRIS_313-10373	GJ-tmp	GJ-temp	0	0	0	1	0	nocov	nocov	0	0	0	nocov	0	1	0	0	0	0	0	nocov	0	0	0	0	0	0	0	nocov	nocov	0	nocov	0	0	0	nocov	0	1	0	0	0	0	0	0	1	0	0	0
O. sativa	IRIS_313-10374	XI-adm	XI-1B	1	1	1	0	1	1	1	1	1	1	nocov	1	1	1	1	1	0	1	1	1	1	1	1	1	1	1	1	1	1	1	1	1	1	nocov	1	0	0	0	0	1	nocov	nocov	1	1	1	1
O. sativa	IRIS_313-10375	XI-adm	XI-adm	1	1	1	0	1	1	1	1	1	1	1	nocov	1	nocov	1	1	0	0	1	1	1	1	1	1	1	1	1	1	1	nocov	0	1	1	0	1	0	1	0	0	nocov	1	1	1	1	1	1
O. sativa	IRIS_313-10379	GJ-tmp	GJ-temp	0	0	0	1	0	nocov	0	0	0	0	0	0	1	0	0	0	0	0	nocov	0	0	0	0	0	0	0	nocov	0	0	0	0	0	0	nocov	0	1	0	0	0	nocov	0	0	1	0	0	0
O. sativa	IRIS_313-10380	cA(Aus)	cA1	1	1	1	0	1	nocov	1	1	1	0	0	1	1	1	1	1	1	0	1	1	1	0	0	1	0	0	0	1	1	0	1	0	0	1	nocov	1	1	0	1	nocov	1	1	1	1	1	0
O. sativa	IRIS_313-10385	XI-1B	XI-1B1	1	1	1	0	1	1	1	1	1	1	1	1	1	1	1	1	0	1	1	1	1	1	1	1	1	1	1	1	1	1	1	1	1	1	1	0	1	0	1	nocov	1	1	1	1	1	1
O. sativa	IRIS_313-10392	XI-1B	XI-1B1	1	1	1	0	1	0	1	0	1	1	1	1	1	1	1	1	0	1	1	1	0	1	1	1	1	1	1	nocov	1	1	1	1	1	1	1	0	0	1	0	0	1	1	1	1	1	1
O. sativa	IRIS_313-10394	XI-adm	XI-3A	1	1	1	1	1	1	nocov	1	1	1	1	1	1	1	1	1	1	1	nocov	1	1	1	1	1	1	1	1	1	0	1	1	1	1	1	1	0	1	0	1	1	1	1	1	1	1	1
O. sativa	IRIS_313-10396	XI-adm	XI-adm	1	1	1	0	1	1	1	1	1	1	1	1	1	1	1	1	0	1	1	1	1	1	1	1	1	1	1	1	1	1	1	1	1	1	1	0	1	0	0	nocov	0	nocov	1	1	1	1
O. sativa	IRIS_313-10397	XI-1B	XI-1B	1	1	1	0	1	0	1	1	1	1	1	1	1	1	1	1	1	1	1	1	0	1	1	1	1	1	1	nocov	1	nocov	1	1	1	nocov	1	0	1	0	0	1	1	1	1	1	1	1
O. sativa	IRIS_313-10398	XI-1B	XI-1B	1	1	1	0	1	0	1	0	1	1	1	1	1	1	1	1	1	1	1	1	0	1	1	1	1	1	1	nocov	1	nocov	1	1	1	nocov	1	0	1	0	0	1	1	1	1	1	1	1
O. sativa	IRIS_313-10399	XI-adm	XI-3A	1	1	1	0	1	1	1	1	1	nocov	1	1	1	1	1	1	0	1	1	1	1	1	1	1	1	1	1	1	1	1	1	1	0	1	nocov	0	1	0	1	1	1	0	1	1	1	1
O. sativa	IRIS_313-10400	XI-1B	XI-1B	1	1	1	0	1	nocov	1	1	1	1	1	1	1	1	1	1	1	1	1	1	1	1	1	1	1	1	1	1	1	nocov	1	1	0	1	1	0	1	0	1	1	1	nocov	1	1	0	1
O. sativa	IRIS_313-10401	XI-1B	XI-1B	1	1	1	0	1	0	1	0	1	1	1	1	1	1	1	1	1	1	1	1	0	1	1	1	1	1	1	nocov	1	nocov	1	1	1	nocov	1	0	1	0	0	1	1	1	1	1	1	1
O. sativa	IRIS_313-10402	XI-1B	XI-1	1	1	1	0	1	1	1	1	1	1	1	1	1	1	1	1	1	1	1	1	1	1	1	1	1	1	1	1	1	nocov	1	1	1	1	1	0	1	0	1	1	1	1	1	1	1	1
O. sativa	IRIS_313-10403	XI-adm	XI-adm	1	1	1	0	1	0	1	1	1	1	1	1	1	1	1	1	1	1	1	1	1	1	1	1	1	1	1	1	1	1	1	1	1	nocov	1	0	1	0	1	1	1	1	1	1	1	1
O. sativa	IRIS_313-10404	XI-adm	XI-1	1	1	1	0	1	1	1	1	1	0	1	1	1	1	1	1	1	1	1	1	1	1	1	1	1	1	1	1	1	1	1	1	1	1	nocov	0	0	0	1	1	1	1	1	1	0	1
O. sativa	IRIS_313-10412	XI-adm	XI-adm	1	1	1	0	1	1	1	1	1	1	1	1	1	1	1	1	0	1	1	1	1	1	1	1	1	1	1	1	1	1	1	1	1	1	nocov	0	1	1	1	1	1	nocov	1	1	1	1
O. sativa	IRIS_313-10417	XI-1B	XI-1B	1	1	1	0	1	1	1	1	1	1	1	1	1	1	1	1	0	1	1	1	1	1	1	1	1	1	1	1	1	1	1	1	1	1	1	0	1	1	1	1	1	1	1	1	1	1
O. sativa	IRIS_313-10421	XI-adm	XI-adm	1	1	1	0	1	1	1	1	1	1	1	1	1	1	0	1	0	1	1	1	1	1	1	1	1	1	1	1	1	1	1	1	1	1	0	0	1	nocov	1	nocov	1	1	1	1	1	1
O. sativa	IRIS_313-10422	XI-adm	XI-2A	1	nocov	1	0	1	1	1	1	1	1	1	1	1	1	1	1	1	1	1	1	1	1	1	1	1	1	1	1	1	1	1	1	1	1	1	0	1	1	1	0	1	nocov	1	1	1	1
O. sativa	IRIS_313-10423	XI-adm	XI-3	1	0	1	1	1	1	0	1	1	1	1	1	1	1	1	1	1	1	1	1	1	1	1	1	1	1	1	1	1	1	1	1	1	1	0	0	0	0	1	1	1	1	1	0	1	1
O. sativa	IRIS_313-10428	XI-3	XI-3A	1	1	1	0	1	nocov	nocov	1	1	1	1	1	1	1	1	1	0	1	1	1	1	1	1	1	1	1	1	1	1	1	1	1	1	1	0	0	1	1	1	nocov	1	0	1	1	1	1
O. sativa	IRIS_313-10429	GJ-tmp	GJ-temp	0	nocov	nocov	1	0	nocov	0	0	0	0	nocov	0	1	nocov	0	0	0	0	nocov	0	0	0	nocov	0	0	0	nocov	0	0	nocov	0	0	0	nocov	0	1	0	0	0	nocov	nocov	0	0	0	0	0
O. sativa	IRIS_313-10430	GJ-tmp	GJ-temp	nocov	nocov	0	1	0	nocov	0	0	0	0	0	0	1	0	0	0	0	0	nocov	0	0	0	0	0	0	0	nocov	nocov	0	nocov	0	0	0	nocov	0	1	0	0	0	nocov	0	0	0	0	0	0
O. sativa	IRIS_313-10433	XI-adm	XI-adm	1	1	1	0	1	1	1	1	1	1	1	1	1	nocov	1	1	0	1	1	1	1	1	1	1	0	1	1	1	1	1	1	1	1	nocov	1	0	0	0	1	1	1	1	1	1	1	1
O. sativa	IRIS_313-10437	GJ-tmp	GJ-temp	0	0	0	1	0	nocov	nocov	0	0	0	0	0	1	nocov	0	0	0	0	nocov	0	0	0	0	0	0	0	nocov	0	0	0	0	0	0	nocov	0	1	0	0	0	nocov	0	0	0	0	0	0
O. sativa	IRIS_313-10440	GJ-tmp	GJ-temp	0	0	0	1	0	nocov	0	0	0	0	0	0	nocov	0	0	1	0	0	nocov	0	0	0	0	0	0	0	nocov	nocov	0	nocov	0	0	0	nocov	0	1	0	0	0	nocov	nocov	0	0	0	0	0
O. sativa	IRIS_313-10441	XI-adm	XI-3B1	1	1	1	0	1	1	1	1	1	1	1	1	1	nocov	1	1	1	1	1	1	1	1	1	1	1	1	1	1	1	1	1	1	1	nocov	1	0	0	1	1	1	1	1	1	1	1	1
O. sativa	IRIS_313-10444	GJ-trp	GJ-trop1	1	0	1	1	1	1	1	1	1	1	nocov	1	1	0	1	1	1	1	1	1	1	1	nocov	1	1	1	nocov	1	1	1	0	1	1	1	1	1	0	1	1	1	1	0	1	1	1	1
O. sativa	IRIS_313-10448	XI-3	XI-3B2	1	0	1	0	1	1	1	1	1	1	1	1	1	1	1	1	0	1	1	1	1	1	1	1	1	1	1	1	1	1	1	1	0	1	nocov	0	1	1	1	nocov	1	0	1	0	1	1
O. sativa	IRIS_313-10449	XI-1A	XI-1A	1	1	1	0	1	nocov	1	1	1	0	1	1	nocov	1	0	1	1	1	1	1	1	1	1	1	1	1	nocov	1	1	1	1	1	0	1	0	0	0	0	1	nocov	1	1	1	1	1	1
O. sativa	IRIS_313-10450	XI-1A	XI-1A	1	nocov	1	0	1	1	1	1	1	1	1	1	1	nocov	1	1	1	1	1	1	1	1	1	1	1	1	1	1	1	1	0	0	0	1	1	0	0	1	1	1	1	1	1	1	1	1
O. sativa	IRIS_313-10452	XI-1A	XI-1A	1	1	1	0	1	1	1	1	1	1	1	1	1	nocov	1	1	1	0	1	1	1	1	1	1	1	1	1	1	1	1	0	1	1	1	1	0	0	1	1	1	1	1	1	1	1	1
O. sativa	IRIS_313-10453	GJ-adm	GJ-trop	0	0	0	1	0	nocov	0	0	0	0	nocov	0	1	0	0	0	0	0	nocov	0	0	0	0	0	0	1	nocov	nocov	1	nocov	0	0	0	0	0	1	0	0	0	nocov	0	nocov	0	0	0	0
O. sativa	IRIS_313-10458	XI-1A	XI-1A	1	1	1	0	1	nocov	1	1	1	1	1	1	1	1	1	1	1	1	1	1	1	1	1	1	1	1	1	1	1	1	1	1	0	1	1	0	0	1	1	1	1	1	1	1	1	1
O. sativa	IRIS_313-10459	GJ-adm	GJ-adm	0	0	0	1	1	0	0	1	0	1	0	1	1	0	0	1	1	0	0	1	1	1	1	1	1	1	nocov	1	0	1	0	0	0	1	0	1	0	0	1	nocov	1	1	0	0	0	0
O. sativa	IRIS_313-10469	GJ-tmp	GJ-temp	0	0	0	1	0	nocov	0	0	0	0	0	0	1	0	0	0	0	0	nocov	0	0	0	0	0	0	0	nocov	nocov	1	nocov	0	0	0	0	0	1	0	0	0	nocov	0	0	0	0	0	0
O. sativa	IRIS_313-10476	XI-2	XI-2B	1	0	1	0	1	1	1	1	1	1	1	1	1	1	1	1	1	1	1	1	1	0	0	1	1	1	1	1	1	1	1	1	1	0	nocov	0	0	1	1	nocov	1	1	1	1	1	1
O. sativa	IRIS_313-10477	XI-adm	XI-3B2	1	1	1	0	1	1	1	1	1	1	1	1	1	nocov	1	1	1	1	1	1	1	1	0	1	1	1	1	1	1	1	0	0	1	1	1	0	1	0	1	1	1	nocov	1	1	1	1
O. sativa	IRIS_313-10480	XI-adm	XI-adm	1	1	1	0	1	1	1	1	1	0	1	1	1	1	1	1	0	1	1	1	1	1	1	1	1	1	1	1	1	1	1	0	1	1	1	0	1	0	1	1	1	0	1	1	1	1
O. sativa	IRIS_313-10484	XI-1A	XI-1A	1	1	1	1	1	1	1	1	1	1	1	1	1	1	1	1	1	1	1	1	1	1	1	1	1	1	1	1	1	1	1	1	1	1	1	1	0	1	1	1	1	1	1	1	1	1
O. sativa	IRIS_313-10485	GJ-trp	GJ-trop1	0	0	nocov	1	0	nocov	0	0	0	1	0	0	1	nocov	0	0	0	0	nocov	0	0	0	0	0	0	1	nocov	1	0	nocov	0	0	0	nocov	0	1	0	0	0	nocov	1	0	1	0	0	0
O. sativa	IRIS_313-10489	GJ-trp	GJ-trop1	0	0	1	1	0	1	0	0	0	1	nocov	0	1	0	0	0	0	0	nocov	0	0	0	0	0	0	1	nocov	1	0	nocov	0	0	0	nocov	0	1	0	1	0	nocov	1	0	1	0	0	0
O. sativa	IRIS_313-10497	XI-1A	XI-1A	1	1	1	0	1	1	1	1	1	1	1	1	1	nocov	1	1	1	1	1	1	1	1	1	1	1	1	nocov	1	1	1	0	1	1	1	1	0	0	1	1	nocov	1	1	1	1	0	1
O. sativa	IRIS_313-10502	XI-1A	XI-1A	1	1	1	0	1	1	1	1	1	1	1	1	1	1	1	1	1	1	1	1	1	1	1	1	1	1	1	1	1	1	1	0	1	1	1	0	0	1	1	1	1	1	1	1	1	1
O. sativa	IRIS_313-10503	XI-1A	XI-adm	1	0	1	0	1	1	1	1	0	1	1	1	1	1	1	1	1	1	1	1	1	1	1	1	1	1	1	1	1	1	0	1	1	1	1	0	0	1	1	nocov	1	1	1	1	1	1
O. sativa	IRIS_313-10504	XI-1A	XI-1A	1	1	1	0	1	1	1	1	0	1	1	1	1	1	1	1	1	1	1	1	1	1	1	1	1	1	1	1	1	1	1	0	0	1	nocov	0	0	1	1	nocov	1	1	1	1	1	1
O. sativa	IRIS_313-10506	XI-3	XI-3B1	1	1	1	0	1	1	1	1	1	1	1	1	1	1	1	1	0	1	1	1	1	1	1	1	1	1	nocov	1	1	1	1	1	0	1	nocov	0	1	1	1	1	1	1	1	1	1	1
O. sativa	IRIS_313-10507	GJ-trp	GJ-trop1	0	1	1	1	0	nocov	0	0	0	0	1	0	1	nocov	0	0	0	0	0	0	0	0	0	0	0	1	0	nocov	0	nocov	0	0	0	nocov	0	0	0	0	0	nocov	0	0	0	0	0	0
O. sativa	IRIS_313-10509	XI-3	XI-3B1	1	1	1	0	1	1	1	1	1	1	1	1	1	1	1	1	0	1	1	1	1	1	1	1	1	1	1	1	1	1	0	1	0	nocov	1	0	1	0	1	1	1	1	1	1	0	1
O. sativa	IRIS_313-10510	XI-adm	XI-3B2	1	1	1	0	1	1	0	1	1	1	1	1	1	1	1	1	1	0	1	1	1	1	1	1	1	1	nocov	1	1	1	1	0	1	1	0	0	1	1	1	1	1	0	1	0	1	0
O. sativa	IRIS_313-10511	XI-3	XI-3B1	1	1	1	0	1	1	1	1	1	1	1	1	1	1	1	1	0	1	1	1	1	1	1	1	1	1	1	1	1	1	1	0	1	1	0	0	1	0	1	1	1	1	1	1	1	1
O. sativa	IRIS_313-10513	XI-adm	XI-3B2	1	1	1	0	1	1	1	1	1	1	1	1	1	1	1	1	0	1	1	1	1	1	1	1	1	1	1	1	1	1	1	1	0	1	1	0	1	1	1	nocov	1	1	1	1	1	1
O. sativa	IRIS_313-10514	XI-adm	XI-adm	1	1	1	0	1	1	1	1	1	1	1	1	1	1	1	1	0	1	1	1	1	1	1	1	1	1	1	1	1	1	1	1	1	1	1	0	0	0	1	1	1	1	1	1	1	1
O. sativa	IRIS_313-10515	XI-1A	XI-1A	1	0	1	0	1	1	1	1	0	1	1	1	1	1	1	1	1	1	1	1	1	1	1	1	1	1	1	1	1	1	0	1	1	1	1	0	0	1	1	1	1	1	1	1	1	1
O. sativa	IRIS_313-10516	XI-adm	XI-adm	1	1	1	0	1	1	1	1	1	1	1	1	1	1	1	1	1	1	1	1	1	1	1	1	1	1	1	1	1	1	0	1	0	1	1	0	0	0	1	1	1	1	1	1	1	1
O. sativa	IRIS_313-10517	XI-3	XI-3B1	1	1	1	0	1	1	1	1	1	1	1	1	1	1	1	1	0	1	1	1	1	1	1	1	1	1	1	1	1	1	1	1	0	1	1	0	1	1	1	1	1	1	1	1	1	1
O. sativa	IRIS_313-10518	XI-adm	XI-adm	1	1	1	0	1	nocov	1	1	1	1	1	1	1	1	1	1	1	1	1	1	1	1	1	1	1	1	1	1	1	1	1	1	1	1	1	0	0	1	1	1	1	0	1	1	1	1
O. sativa	IRIS_313-10519	XI-2	XI-2	1	0	1	0	1	1	1	1	1	1	1	1	1	1	1	1	0	1	1	1	1	1	1	1	1	0	1	1	1	1	1	1	1	1	0	0	0	0	1	1	1	1	1	1	0	1
O. sativa	IRIS_313-10520	XI-adm	XI-3B	1	1	1	0	1	1	1	1	1	1	1	1	1	1	1	1	0	1	1	1	1	1	1	1	1	1	1	1	1	1	1	1	0	1	1	0	1	0	1	nocov	1	1	0	1	1	1
O. sativa	IRIS_313-10521	cB(Bas)	cB	1	0	1	1	0	nocov	0	0	1	0	0	0	1	1	1	0	0	0	1	1	0	0	0	1	0	0	nocov	1	0	0	0	0	0	nocov	nocov	0	0	0	0	0	nocov	0	0	0	0	0
O. sativa	IRIS_313-10522	admix	GJ-trop	1	1	nocov	1	1	1	1	1	1	1	nocov	1	1	1	1	1	0	1	1	1	1	1	0	1	1	1	nocov	1	1	1	0	1	1	nocov	0	1	0	1	1	1	1	0	1	1	0	1
O. sativa	IRIS_313-10523	XI-adm	XI-adm	1	1	1	0	1	1	1	1	1	1	0	1	1	1	1	1	1	1	nocov	1	1	1	1	1	1	0	1	1	1	1	1	1	1	nocov	1	0	1	1	1	nocov	1	nocov	1	1	1	1
O. sativa	IRIS_313-10524	XI-3	XI-3B1	1	1	1	0	1	1	1	1	1	1	1	1	1	1	1	1	0	1	1	1	1	1	1	1	1	1	1	1	1	1	1	1	0	1	nocov	0	1	1	1	nocov	1	0	1	1	1	1
O. sativa	IRIS_313-10525	XI-3	XI-3A	1	1	1	0	1	1	1	1	1	1	1	1	1	1	1	1	0	1	1	1	1	1	1	1	1	1	1	1	1	1	1	0	1	1	0	0	1	0	1	nocov	1	0	1	1	1	1
O. sativa	IRIS_313-10526	XI-2	XI-2	1	1	1	0	1	1	1	1	1	1	1	1	1	1	1	1	0	1	1	1	1	1	1	1	1	1	1	1	1	1	1	0	0	1	0	1	1	0	1	1	1	0	1	1	1	1
O. sativa	IRIS_313-10527	XI-2	XI-2B	1	1	1	0	1	1	1	1	1	1	1	1	1	1	1	1	1	1	1	0	1	1	1	1	1	1	nocov	1	1	1	1	0	1	1	0	0	0	0	0	nocov	1	1	1	1	1	1
O. sativa	IRIS_313-10531	admix	admix	1	1	1	1	1	1	1	1	1	1	1	1	1	1	1	1	0	1	1	1	1	1	1	1	1	1	1	1	1	1	1	1	1	1	0	0	1	1	1	1	1	1	1	0	1	1
O. sativa	IRIS_313-10534	cA(Aus)	cA2	1	1	1	0	1	1	1	1	1	0	1	1	1	1	1	1	1	0	nocov	0	0	0	0	0	0	0	nocov	nocov	0	1	0	0	1	nocov	nocov	0	0	0	0	nocov	1	1	0	1	0	0
O. sativa	IRIS_313-10536	XI-2	XI-2B	1	1	1	0	1	1	1	1	1	1	1	1	1	1	1	1	1	0	1	1	1	1	1	1	1	1	1	1	1	1	1	1	0	1	0	0	0	0	1	nocov	1	1	1	1	1	1
O. sativa	IRIS_313-10537	admix	admix	nocov	1	0	0	1	1	nocov	nocov	0	0	1	0	nocov	1	0	0	0	0	nocov	0	0	0	nocov	0	0	0	nocov	1	0	1	0	0	0	1	0	1	1	0	1	nocov	nocov	nocov	0	0	0	0
O. sativa	IRIS_313-10539	XI-2	XI-2A	1	nocov	1	0	1	1	1	1	1	1	1	1	nocov	nocov	1	1	0	1	1	1	1	1	0	1	1	1	1	1	1	1	1	nocov	1	nocov	1	0	0	1	1	nocov	1	nocov	0	1	1	1
O. sativa	IRIS_313-10541	GJ-trp	GJ-trop1	0	0	0	1	0	nocov	0	0	0	1	0	0	1	0	0	0	0	0	nocov	0	0	0	0	0	0	0	nocov	1	0	nocov	0	0	0	nocov	0	1	0	1	0	0	0	0	1	0	0	1
O. sativa	IRIS_313-10542	XI-2	XI-2	1	0	1	0	1	1	1	1	1	1	1	0	1	nocov	1	1	1	1	1	1	1	1	1	1	1	1	1	1	1	1	1	1	0	1	1	0	0	1	0	nocov	1	nocov	1	1	1	1
O. sativa	IRIS_313-10543	cA(Aus)	cA2	1	1	1	0	1	1	1	1	1	0	1	nocov	1	nocov	1	1	1	0	0	0	1	0	0	0	0	0	0	1	1	nocov	0	nocov	0	nocov	0	0	1	0	1	nocov	nocov	1	0	1	0	0
O. sativa	IRIS_313-10544	XI-2	XI-2B	1	1	1	0	1	1	1	1	0	1	1	1	1	1	1	1	1	1	1	1	1	1	1	1	1	0	1	1	1	1	1	1	0	1	0	0	0	1	1	nocov	1	1	1	1	1	1
O. sativa	IRIS_313-10545	cA(Aus)	cA2	1	0	1	0	1	1	1	1	1	1	1	1	1	nocov	1	1	1	0	0	0	0	nocov	0	0	0	1	0	nocov	1	nocov	0	0	0	nocov	nocov	0	0	1	0	nocov	1	1	0	1	0	1
O. sativa	IRIS_313-10547	XI-adm	XI-2A	1	0	1	0	1	1	1	1	1	1	1	1	1	1	1	1	0	1	1	1	1	1	1	1	0	1	nocov	1	1	1	1	1	1	1	1	0	1	1	1	1	1	1	1	1	1	1
O. sativa	IRIS_313-10549	cA(Aus)	cA1	1	1	1	0	1	1	1	1	0	0	1	1	1	nocov	1	1	1	0	1	0	1	1	0	0	0	0	0	1	1	0	0	nocov	0	nocov	0	0	1	0	1	nocov	nocov	1	0	1	0	0
O. sativa	IRIS_313-10550	XI-adm	XI-adm	1	1	1	0	1	1	1	1	1	1	1	1	1	1	1	1	0	0	1	1	1	1	1	1	1	1	1	1	1	1	1	1	1	1	1	0	1	0	1	1	1	1	1	1	1	1
O. sativa	IRIS_313-10552	GJ-trp	GJ-trop1	0	0	nocov	1	0	1	0	0	0	1	0	0	1	0	0	0	0	0	nocov	0	0	0	0	0	0	0	nocov	1	0	nocov	0	0	0	nocov	0	1	0	1	0	nocov	0	0	1	0	0	0
O. sativa	IRIS_313-10554	XI-3	XI-3B	1	1	1	0	1	1	1	1	1	1	1	1	1	nocov	1	1	0	1	1	1	1	1	1	1	1	1	1	1	1	1	1	nocov	1	1	1	0	1	0	1	nocov	1	1	1	1	1	1
O. sativa	IRIS_313-10555	XI-3	XI-3B1	1	0	1	0	1	1	1	1	1	1	1	1	1	1	1	1	0	1	1	1	1	1	1	1	1	1	1	1	1	1	1	0	1	1	nocov	0	1	0	1	nocov	1	1	1	1	1	1
O. sativa	IRIS_313-10556	XI-3	XI-3B1	1	1	1	0	1	1	1	1	1	1	1	1	1	1	1	1	0	1	1	1	1	1	1	1	1	1	1	1	1	1	1	0	1	1	nocov	0	1	0	1	nocov	1	nocov	1	0	0	1
O. sativa	IRIS_313-10557	XI-3	XI-3B1	1	1	1	0	1	1	1	1	1	1	1	1	1	1	1	1	0	1	1	1	1	1	1	1	1	1	nocov	1	1	1	1	1	1	nocov	nocov	0	1	0	1	1	1	nocov	1	0	1	1
O. sativa	IRIS_313-10558	GJ-tmp	GJ-temp	0	0	0	1	0	nocov	0	0	0	0	nocov	0	1	0	0	1	0	0	0	0	0	0	0	0	0	0	nocov	0	0	nocov	nocov	0	0	nocov	0	1	0	nocov	0	nocov	nocov	nocov	0	0	0	0
O. sativa	IRIS_313-10559	GJ-tmp	GJ-temp	0	0	0	1	0	nocov	0	0	0	0	nocov	0	1	nocov	0	0	0	0	nocov	0	0	0	0	0	0	0	nocov	nocov	0	0	0	0	0	0	0	1	0	0	1	nocov	0	0	0	0	0	0
O. sativa	IRIS_313-10560	XI-1A	XI-1A	1	0	1	0	1	1	1	1	1	1	1	1	1	1	1	1	1	0	1	1	1	1	1	1	1	1	1	1	1	1	0	0	1	1	0	0	0	1	1	1	1	nocov	1	1	1	1
O. sativa	IRIS_313-10561	XI-1A	XI-1A	1	1	1	0	1	1	1	1	1	1	1	1	1	1	1	1	1	1	1	1	1	1	1	1	1	1	1	1	1	1	1	1	1	1	1	0	0	1	1	1	1	1	1	1	0	1
O. sativa	IRIS_313-10562	GJ-adm	GJ-adm	1	0	1	1	0	nocov	0	0	0	1	0	0	nocov	1	0	0	0	0	nocov	0	0	1	0	0	0	0	0	nocov	0	nocov	0	0	1	nocov	0	1	0	0	1	nocov	nocov	0	0	0	0	0
O. sativa	IRIS_313-10563	GJ-tmp	GJ-temp	0	nocov	0	1	0	0	0	0	0	0	0	0	1	nocov	0	0	0	0	0	0	0	0	0	0	0	0	nocov	nocov	0	nocov	0	0	0	nocov	0	1	0	0	0	nocov	0	0	0	0	0	0
O. sativa	IRIS_313-10564	GJ-tmp	GJ-temp	0	0	0	1	0	nocov	0	0	0	0	nocov	0	1	0	0	0	0	0	nocov	0	0	0	0	0	0	0	nocov	nocov	0	nocov	0	0	0	1	0	1	0	0	0	nocov	0	0	0	0	0	0
O. sativa	IRIS_313-10565	XI-adm	XI-adm	1	1	1	0	1	1	1	1	1	1	1	1	1	1	1	1	0	0	1	1	1	1	1	1	1	1	1	1	1	1	1	1	1	1	1	0	0	0	1	1	1	1	1	1	1	1
O. sativa	IRIS_313-10566	XI-adm	XI-adm	1	1	1	0	1	1	1	1	1	1	1	1	1	1	1	1	0	1	1	1	1	1	1	1	1	1	1	1	1	1	1	1	1	1	1	0	1	0	1	1	1	1	1	1	1	1
O. sativa	IRIS_313-10567	GJ-tmp	GJ-temp	0	0	0	1	0	nocov	0	0	0	0	0	0	1	0	0	0	0	0	nocov	0	0	0	0	0	0	0	nocov	0	0	nocov	0	0	0	nocov	0	1	0	0	0	nocov	0	0	0	0	0	0
O. sativa	IRIS_313-10568	GJ-tmp	GJ-temp	0	0	nocov	1	0	nocov	0	0	0	0	0	0	1	nocov	0	0	0	0	nocov	0	0	0	0	0	0	0	nocov	0	1	0	0	0	0	nocov	0	1	0	0	0	nocov	0	0	0	0	0	0
O. sativa	IRIS_313-10569	GJ-tmp	GJ-temp	0	0	0	1	0	nocov	0	0	0	0	nocov	0	1	nocov	0	0	0	0	nocov	0	0	0	0	0	0	0	nocov	0	0	nocov	0	0	0	nocov	0	1	0	0	0	0	0	0	0	nocov	0	0
O. sativa	IRIS_313-10570	GJ-tmp	GJ-temp	0	0	0	1	0	nocov	0	0	0	0	0	0	1	0	0	0	0	0	nocov	0	0	0	0	0	0	0	nocov	0	0	nocov	0	0	0	nocov	0	1	0	0	0	nocov	0	0	0	0	0	1
O. sativa	IRIS_313-10572	XI-adm	XI-adm	1	nocov	1	0	1	1	1	1	1	1	1	1	1	nocov	1	1	1	1	1	1	1	1	1	1	1	1	1	1	1	1	1	1	1	1	nocov	0	1	1	1	1	1	1	1	1	1	1
O. sativa	IRIS_313-10573	XI-2	XI-2A	1	0	1	0	1	1	1	1	1	1	1	1	1	nocov	1	1	0	1	1	1	1	1	1	1	1	1	1	1	1	1	1	1	0	nocov	0	0	0	1	1	1	1	nocov	1	1	1	1
O. sativa	IRIS_313-10574	XI-adm	XI-2	1	1	1	0	1	1	1	1	1	nocov	1	1	1	nocov	1	1	0	1	1	1	1	1	1	1	1	1	nocov	1	1	1	1	1	0	1	0	0	0	0	1	nocov	1	1	1	1	0	1
O. sativa	IRIS_313-10575	XI-adm	XI-adm	1	1	nocov	0	1	nocov	1	1	1	1	1	1	1	nocov	1	1	1	1	1	1	1	1	1	1	1	1	nocov	1	1	1	1	1	1	1	1	0	0	1	1	1	1	nocov	1	1	1	1
O. sativa	IRIS_313-10576	XI-2	XI-2A	1	0	1	0	1	1	1	1	1	1	1	1	1	1	1	1	1	1	1	1	1	1	1	1	1	1	1	1	1	1	1	1	1	1	1	0	1	1	1	nocov	1	1	1	1	1	1
O. sativa	IRIS_313-10577	GJ-trp	GJ-trop1	nocov	0	0	1	0	nocov	0	0	0	0	0	0	1	0	0	0	0	0	nocov	0	0	0	0	0	0	0	nocov	nocov	0	nocov	0	0	0	nocov	0	1	0	0	0	0	1	0	0	0	0	0
O. sativa	IRIS_313-10578	GJ-trp	GJ-trop1	0	1	0	1	0	1	0	0	0	1	0	0	1	0	0	0	0	0	nocov	0	0	0	0	0	0	1	nocov	1	1	nocov	0	0	0	nocov	0	1	0	0	0	nocov	1	0	0	0	0	0
O. sativa	IRIS_313-10580	GJ-trp	GJ-trop1	0	1	nocov	1	0	1	nocov	0	0	1	nocov	0	1	nocov	0	0	0	0	0	0	0	0	0	0	0	1	0	1	0	nocov	0	0	0	nocov	0	1	0	1	0	nocov	1	0	0	0	0	0
O. sativa	IRIS_313-10581	GJ-trp	GJ-trop1	nocov	0	0	1	0	1	nocov	0	nocov	1	nocov	0	1	0	0	0	0	0	nocov	0	0	0	0	0	0	0	nocov	1	0	nocov	0	nocov	0	nocov	0	1	0	1	0	nocov	1	nocov	1	0	0	0
O. sativa	IRIS_313-10582	GJ-trp	GJ-trop1	0	0	0	1	0	nocov	0	0	0	0	0	0	1	nocov	0	0	0	0	nocov	0	0	0	0	0	0	0	nocov	nocov	1	nocov	0	0	0	nocov	0	1	0	0	0	nocov	0	0	0	0	0	0
O. sativa	IRIS_313-10583	GJ-tmp	GJ-temp	nocov	nocov	0	1	0	nocov	0	0	0	0	0	0	1	0	0	0	0	0	nocov	0	0	0	nocov	0	0	0	nocov	0	0	nocov	0	nocov	0	nocov	0	1	0	nocov	0	nocov	0	0	0	0	0	0
O. sativa	IRIS_313-10585	admix	admix	1	0	0	0	1	1	1	1	0	0	0	1	1	0	1	1	0	1	1	0	1	1	0	0	1	0	nocov	1	1	nocov	0	1	1	nocov	0	0	1	1	1	1	1	nocov	1	1	0	1
O. sativa	IRIS_313-10587	cA(Aus)	cA1	1	1	1	0	1	1	1	1	1	0	1	1	1	nocov	1	1	1	0	1	1	1	1	0	1	0	0	0	1	1	nocov	0	0	0	1	0	0	0	0	1	nocov	1	0	0	1	0	1
O. sativa	IRIS_313-10592	cA(Aus)	cA-adm	1	1	1	0	1	1	1	1	1	1	1	1	1	1	1	1	1	0	1	1	1	0	0	0	0	0	nocov	1	1	nocov	0	0	0	nocov	0	0	0	0	1	nocov	1	nocov	0	1	0	0
O. sativa	IRIS_313-10593	cA(Aus)	cA2	nocov	1	1	0	1	1	1	1	1	nocov	1	1	1	1	1	1	1	0	nocov	0	1	1	0	0	0	0	nocov	1	0	nocov	0	0	0	nocov	0	0	1	nocov	1	nocov	1	nocov	1	1	0	0
O. sativa	IRIS_313-10594	cA(Aus)	cA1	1	1	1	0	1	1	1	1	1	nocov	1	nocov	1	nocov	1	1	1	0	1	1	1	1	0	1	0	0	nocov	1	1	nocov	0	0	0	nocov	nocov	0	1	0	1	nocov	1	1	1	1	0	0
O. sativa	IRIS_313-10595	cA(Aus)	cA-adm	1	1	1	0	1	1	1	1	1	0	1	1	1	nocov	1	1	1	0	1	1	1	1	0	0	0	0	nocov	1	1	0	0	nocov	0	1	nocov	0	0	1	1	nocov	1	0	1	1	0	0
O. sativa	IRIS_313-10598	cA(Aus)	cA-adm	1	1	1	0	1	1	1	1	1	0	1	1	1	1	1	1	1	0	1	1	1	1	0	1	0	0	0	1	1	nocov	0	nocov	0	nocov	0	0	1	0	1	nocov	1	nocov	1	1	0	1
O. sativa	IRIS_313-10600	cA(Aus)	cA1	1	1	1	0	1	1	1	1	1	0	1	1	1	nocov	1	1	1	0	1	1	1	1	0	0	0	0	nocov	1	1	0	0	0	0	1	nocov	0	1	nocov	1	nocov	1	1	1	1	0	0
O. sativa	IRIS_313-10602	cA(Aus)	cA-adm	1	1	1	0	1	1	1	1	1	0	1	1	1	nocov	1	1	1	0	1	1	1	1	0	0	0	0	nocov	1	0	0	0	0	0	1	0	0	0	0	1	nocov	1	1	1	1	0	0
O. sativa	IRIS_313-10603	cA(Aus)	cA2	1	1	1	0	1	1	1	1	1	1	1	nocov	1	1	1	1	1	0	nocov	0	1	0	0	0	0	0	nocov	1	1	1	0	0	0	1	0	0	1	0	0	nocov	1	0	0	1	0	0
O. sativa	IRIS_313-10604	cA(Aus)	cA1	1	1	1	0	1	1	1	1	1	1	1	nocov	1	nocov	1	1	1	0	1	1	1	1	0	1	0	0	nocov	1	1	0	0	0	0	nocov	nocov	0	0	0	1	nocov	1	0	0	1	0	0
O. sativa	IRIS_313-10605	cA(Aus)	cA2	1	1	1	0	1	1	1	1	1	1	1	1	1	1	1	1	1	0	nocov	1	0	1	nocov	0	0	0	nocov	nocov	1	0	0	0	0	0	0	0	1	0	0	nocov	1	1	0	1	0	1
O. sativa	IRIS_313-10606	cA(Aus)	cA1	nocov	1	1	0	1	1	1	1	1	nocov	1	1	1	nocov	1	1	1	0	1	1	1	1	nocov	1	0	0	nocov	1	1	nocov	0	0	0	nocov	nocov	0	0	0	0	nocov	1	1	1	1	0	0
O. sativa	IRIS_313-10608	cA(Aus)	cA1	1	1	1	0	1	nocov	1	1	0	nocov	nocov	1	1	nocov	1	1	1	0	1	1	1	0	0	1	0	0	nocov	1	1	nocov	0	0	0	1	0	0	0	0	0	nocov	1	1	1	1	0	0
O. sativa	IRIS_313-10609	XI-adm	XI-adm	1	1	1	0	1	1	1	1	0	1	1	1	1	1	1	1	1	0	1	1	1	0	1	1	1	1	1	1	1	1	0	1	1	1	1	0	nocov	1	1	nocov	1	1	1	0	1	1
O. sativa	IRIS_313-10610	XI-2	XI-2B	1	0	1	0	1	1	1	1	1	1	1	1	1	1	1	1	1	1	1	1	1	1	1	0	1	0	1	1	1	1	0	1	1	1	1	0	0	1	0	nocov	1	1	1	1	1	1
O. sativa	IRIS_313-10614	XI-adm	XI-3B2	1	1	1	0	1	1	1	1	1	1	1	1	1	nocov	0	1	0	1	1	1	1	1	0	1	1	1	1	1	1	1	0	0	1	nocov	1	0	1	0	1	1	1	nocov	1	1	1	1
O. sativa	IRIS_313-10617	GJ-tmp	GJ-temp	0	0	1	1	0	nocov	0	0	0	0	0	0	1	0	0	0	0	0	nocov	0	0	0	0	0	0	0	nocov	nocov	0	0	0	0	0	nocov	0	1	0	0	0	nocov	0	0	0	0	0	0
O. sativa	IRIS_313-10618	GJ-tmp	GJ-temp	0	0	0	1	0	nocov	0	0	0	0	nocov	0	1	0	0	0	0	0	nocov	0	0	0	0	0	0	0	nocov	0	0	nocov	0	0	0	nocov	0	1	0	0	0	nocov	nocov	0	0	0	0	0
O. sativa	IRIS_313-10619	GJ-trp	GJ-trop1	0	1	0	1	0	nocov	0	0	0	0	0	0	1	0	0	0	0	0	nocov	0	0	0	0	0	0	0	nocov	1	0	nocov	0	0	0	nocov	0	1	0	1	0	nocov	0	0	1	0	0	0
O. sativa	IRIS_313-10620	GJ-trp	GJ-trop1	0	0	0	1	0	nocov	0	0	0	0	0	0	1	nocov	0	0	0	0	nocov	0	0	0	0	0	0	1	nocov	1	0	nocov	0	0	0	nocov	0	1	0	0	0	nocov	1	0	0	0	0	0
O. sativa	IRIS_313-10623	cA(Aus)	cA2	1	0	1	0	1	1	1	1	1	0	1	1	1	1	1	1	1	0	1	1	1	0	0	0	0	0	nocov	1	1	0	0	0	0	1	0	0	nocov	0	0	nocov	1	1	1	1	0	1
O. sativa	IRIS_313-10628	XI-2	XI-2	1	0	1	0	1	1	1	1	1	1	1	1	1	1	1	1	1	1	1	1	1	1	1	1	1	1	1	1	1	1	1	1	1	1	1	0	0	1	0	nocov	1	1	1	1	1	1
O. sativa	IRIS_313-10631	GJ-tmp	GJ-temp	0	0	0	1	0	nocov	0	0	0	0	0	0	1	0	0	0	0	0	nocov	0	0	0	0	0	0	0	nocov	0	0	nocov	0	0	0	nocov	0	1	0	0	0	nocov	0	0	0	0	0	0
O. sativa	IRIS_313-10640	XI-2	XI-2A	1	nocov	1	0	1	1	1	1	1	1	1	1	1	1	1	1	1	1	1	1	1	1	1	1	1	1	1	1	1	1	1	1	1	1	1	0	0	1	1	nocov	1	1	1	1	1	1
O. sativa	IRIS_313-10642	GJ-tmp	GJ-temp	0	0	nocov	1	0	nocov	0	0	0	0	nocov	0	1	0	0	0	0	0	0	0	0	0	0	0	0	0	0	0	1	nocov	0	0	0	nocov	0	1	0	0	0	nocov	0	0	0	0	0	0
O. sativa	IRIS_313-10644	GJ-trp	GJ-trop1	0	0	0	1	0	nocov	0	0	0	0	0	0	1	0	0	1	0	0	0	0	0	0	0	0	0	1	0	nocov	0	nocov	0	0	0	nocov	0	1	0	0	0	0	0	0	0	0	0	0
O. sativa	IRIS_313-10645	GJ-trp	GJ-trop1	0	nocov	0	1	0	nocov	0	0	0	0	0	0	1	0	0	1	0	0	nocov	0	0	0	0	0	0	1	nocov	nocov	1	nocov	nocov	0	0	nocov	0	1	0	0	0	nocov	0	0	0	0	0	0
O. sativa	IRIS_313-10648	XI-3	XI-3B1	1	1	1	0	1	1	1	1	1	1	1	1	1	1	1	1	0	1	1	1	1	1	1	1	1	1	1	1	1	1	1	0	1	1	0	0	1	0	1	nocov	1	nocov	1	1	1	1
O. sativa	IRIS_313-10649	GJ-trp	GJ-trop2	0	0	0	1	0	nocov	nocov	0	0	1	0	0	nocov	0	0	0	0	0	nocov	0	0	0	0	0	0	1	nocov	1	0	nocov	0	0	0	nocov	0	1	0	0	0	1	0	0	1	0	0	0
O. sativa	IRIS_313-10650	XI-3	XI-3A	1	1	1	0	1	nocov	1	1	1	1	1	1	1	1	1	1	0	1	1	1	1	1	1	1	1	1	1	1	1	1	1	1	1	1	0	0	1	1	1	nocov	1	1	1	1	1	1
O. sativa	IRIS_313-10651	XI-adm	XI-3B1	1	1	1	0	1	1	1	1	1	1	1	1	1	1	1	1	1	1	1	1	1	1	1	1	1	1	nocov	1	1	1	1	1	0	1	1	0	1	0	1	nocov	1	0	1	1	1	1
O. sativa	IRIS_313-10652	XI-3	XI-3B1	1	1	1	0	1	1	1	1	1	1	1	1	1	1	1	1	0	1	1	1	1	1	1	1	1	1	1	1	1	1	1	1	1	nocov	1	0	1	1	1	nocov	1	1	1	1	1	1
O. sativa	IRIS_313-10653	GJ-sbtrp	GJ-subtrp	1	0	0	1	0	nocov	0	0	0	0	0	0	1	0	0	0	0	0	1	0	0	0	0	0	0	0	nocov	1	0	nocov	0	0	0	nocov	0	1	0	0	1	0	1	0	0	0	1	0
O. sativa	IRIS_313-10654	XI-3	XI-3B1	1	1	1	0	1	1	1	0	1	1	1	1	1	1	1	1	1	1	1	1	1	1	1	1	1	1	1	1	1	1	1	0	1	1	1	0	1	1	1	nocov	1	nocov	1	1	1	1
O. sativa	IRIS_313-10655	XI-adm	XI-3B	1	1	1	0	1	1	1	1	1	1	1	1	1	1	1	1	1	1	1	1	1	1	1	1	1	1	1	1	1	1	1	1	1	1	1	0	0	1	1	nocov	1	nocov	1	1	1	1
O. sativa	IRIS_313-10656	GJ-sbtrp	GJ-subtrp	1	1	0	1	0	nocov	0	0	0	0	0	0	1	0	0	0	0	0	nocov	0	0	0	0	0	0	0	nocov	1	0	nocov	0	0	0	nocov	0	1	0	0	1	nocov	0	0	0	0	0	0
O. sativa	IRIS_313-10657	GJ-sbtrp	GJ-subtrp	0	0	0	1	0	nocov	0	0	0	0	0	0	1	0	0	0	0	0	nocov	0	0	0	0	0	0	0	nocov	1	0	nocov	0	0	0	nocov	0	1	0	0	1	0	0	0	0	0	0	0
O. sativa	IRIS_313-10659	XI-3	XI-3B1	1	1	1	0	1	1	1	1	1	1	1	1	1	1	1	1	1	1	1	1	1	1	1	1	1	1	1	1	1	1	0	1	1	1	1	0	1	0	1	1	1	nocov	1	1	1	1
O. sativa	IRIS_313-10660	GJ-sbtrp	GJ-subtrp	1	nocov	1	1	0	nocov	nocov	0	0	0	nocov	0	1	nocov	0	0	0	0	nocov	0	0	0	nocov	0	0	0	nocov	1	0	nocov	nocov	0	0	nocov	0	1	0	0	1	nocov	nocov	0	0	0	0	0
O. sativa	IRIS_313-10661	XI-2	XI-2B	1	1	1	0	1	1	1	1	0	1	1	1	1	1	1	1	1	1	1	1	1	0	0	1	1	0	1	1	1	1	0	1	1	1	0	0	0	1	1	nocov	1	1	1	1	1	1
O. sativa	IRIS_313-10662	XI-2	XI-2B	1	0	1	0	1	1	1	1	1	1	1	1	1	1	1	1	1	1	1	1	1	0	1	0	0	0	1	1	1	1	1	1	1	0	nocov	0	0	1	1	1	1	1	1	1	1	1
O. sativa	IRIS_313-10664	XI-2	XI-2A	1	1	1	0	1	1	1	1	1	0	1	1	1	1	1	1	1	1	1	1	0	1	1	1	1	1	1	nocov	1	1	1	1	1	1	0	0	1	0	0	1	1	0	1	1	1	1
O. sativa	IRIS_313-10666	XI-adm	XI-3B1	1	1	1	0	1	1	1	1	1	1	1	1	1	1	1	1	1	1	1	1	1	1	1	1	1	1	1	1	1	1	1	1	1	nocov	1	0	1	1	1	1	1	0	1	1	1	1
O. sativa	IRIS_313-10667	XI-2	XI-2	1	1	1	0	1	1	1	1	1	1	1	1	1	1	1	1	1	1	1	1	1	1	1	1	1	1	1	1	1	1	1	1	1	nocov	1	0	0	1	1	nocov	1	1	0	1	0	1
O. sativa	IRIS_313-10668	XI-adm	XI-2A	1	0	1	0	1	1	1	1	1	1	1	1	1	1	1	1	1	1	1	1	1	1	1	1	1	1	nocov	1	1	1	1	1	1	1	1	0	1	1	1	1	1	1	1	1	0	1
O. sativa	IRIS_313-10670	cB(Bas)	cB	nocov	0	0	1	0	nocov	0	0	0	0	0	0	nocov	1	1	0	0	0	nocov	0	0	0	0	0	0	0	nocov	1	1	0	0	0	0	nocov	0	0	0	0	0	0	nocov	0	0	0	0	0
O. sativa	IRIS_313-10671	XI-adm	XI-adm	1	1	1	0	1	1	1	1	1	0	1	1	1	1	1	1	1	0	1	1	1	1	1	1	0	1	1	1	1	1	0	1	0	1	1	0	0	1	1	nocov	1	1	0	1	1	1
O. sativa	IRIS_313-10673	cA(Aus)	cA2	1	1	1	0	1	1	1	1	1	nocov	1	nocov	1	1	1	1	1	0	nocov	0	0	0	0	0	0	0	nocov	nocov	0	1	0	0	1	1	nocov	0	0	0	0	nocov	1	1	0	1	0	0
O. sativa	IRIS_313-10674	XI-adm	XI-2	1	1	1	0	1	1	1	1	1	1	1	0	1	1	1	1	1	1	1	1	1	1	nocov	1	1	1	nocov	1	1	1	1	1	1	1	1	0	1	1	1	1	1	1	1	1	1	1
O. sativa	IRIS_313-10675	XI-adm	XI-adm	1	1	1	0	1	1	1	1	0	0	1	1	1	1	1	1	1	0	1	1	1	1	0	0	1	1	1	1	1	1	0	1	1	1	0	0	0	1	1	0	1	0	0	1	1	1
O. sativa	IRIS_313-10676	admix	admix	1	1	1	0	1	1	1	1	1	1	0	1	1	1	1	1	1	1	nocov	1	1	1	0	0	1	0	1	1	1	1	0	0	1	nocov	nocov	0	0	1	1	0	1	1	0	1	0	1
O. sativa	IRIS_313-10677	GJ-tmp	GJ-temp	0	0	0	1	0	nocov	0	0	0	0	0	0	1	0	0	0	0	0	nocov	0	0	0	0	0	0	0	nocov	0	0	1	0	0	0	nocov	0	1	0	0	0	nocov	0	0	0	0	0	0
O. sativa	IRIS_313-10678	XI-2	XI-2A	1	0	0	0	1	1	1	1	1	1	1	1	1	1	1	1	1	1	1	1	1	1	1	1	1	1	1	1	1	1	1	1	1	1	1	0	0	1	1	0	1	1	1	1	1	1
O. sativa	IRIS_313-10679	GJ-sbtrp	GJ-subtrp	0	nocov	0	1	0	nocov	0	0	0	0	0	0	1	0	0	0	0	0	nocov	0	0	0	0	0	0	0	nocov	nocov	0	nocov	0	0	0	nocov	0	1	0	0	1	nocov	0	0	0	0	0	0
O. sativa	IRIS_313-10680	XI-3	XI-3B1	1	1	1	0	1	1	1	1	1	1	1	1	1	1	1	1	0	1	1	1	1	1	nocov	1	1	1	1	1	1	1	1	1	1	1	1	0	1	0	1	1	1	nocov	1	1	1	1
O. sativa	IRIS_313-10681	XI-3	XI-3B1	1	1	1	0	1	1	1	1	1	1	1	1	1	1	1	1	1	1	1	1	1	1	1	1	1	1	1	1	1	1	1	1	1	nocov	1	0	1	0	1	1	1	1	1	1	1	1
O. sativa	IRIS_313-10682	XI-3	XI-3B1	1	1	1	0	1	1	1	1	1	1	1	1	1	1	1	1	0	1	1	1	1	1	1	1	1	1	1	1	1	1	0	1	1	1	1	0	0	0	1	1	1	nocov	1	1	1	1
O. sativa	IRIS_313-10683	XI-3	XI-3B1	1	1	1	0	1	1	1	1	1	1	1	1	1	1	1	1	1	1	1	1	1	1	1	1	1	1	1	1	1	1	0	1	1	1	1	0	0	0	1	1	1	nocov	1	1	1	1
O. sativa	IRIS_313-10684	XI-3	XI-3A	1	1	1	0	1	1	1	1	1	1	1	1	1	1	1	1	0	1	1	1	1	1	1	1	1	1	1	1	1	1	1	1	1	1	nocov	0	1	0	1	1	1	nocov	1	1	1	1
O. sativa	IRIS_313-10687	XI-3	XI-3A	1	0	1	0	1	1	0	1	1	1	1	1	1	1	1	1	0	1	1	1	1	1	1	1	1	1	1	1	1	1	1	1	1	1	0	0	1	0	1	1	1	nocov	1	1	1	1
O. sativa	IRIS_313-10688	XI-3	XI-3A	1	1	1	0	1	1	0	1	1	1	1	1	1	1	1	1	0	1	1	1	1	1	1	1	1	1	1	1	1	1	1	1	1	1	nocov	0	1	0	1	1	1	1	1	1	1	1
O. sativa	IRIS_313-10689	GJ-trp	GJ-trop2	nocov	0	1	1	0	nocov	0	0	0	0	0	0	nocov	0	0	0	0	0	nocov	0	0	nocov	0	0	0	0	nocov	1	1	nocov	0	0	0	nocov	0	1	0	0	1	1	0	0	0	0	0	0
O. sativa	IRIS_313-10690	XI-3	XI-3A	1	1	1	0	1	1	1	1	1	1	1	1	1	1	1	1	0	1	1	1	1	1	0	1	1	1	1	1	1	1	1	1	1	1	1	0	1	0	1	1	1	1	1	1	1	1
O. sativa	IRIS_313-10692	XI-3	XI-3A	1	1	1	0	1	1	1	1	1	1	1	1	1	1	1	1	0	1	1	1	1	1	1	1	1	1	nocov	1	1	1	1	0	1	1	1	1	1	0	1	nocov	1	1	1	1	1	1
O. sativa	IRIS_313-10693	GJ-trp	GJ-trop2	0	0	1	1	0	nocov	0	0	0	0	0	0	nocov	0	0	0	0	0	nocov	0	0	0	0	0	0	0	nocov	1	1	nocov	0	0	0	nocov	0	1	0	0	1	1	0	0	nocov	0	0	0
O. sativa	IRIS_313-10694	XI-3	XI-3B1	1	nocov	1	0	1	1	1	1	1	1	1	1	1	nocov	1	1	0	1	1	1	1	1	1	1	1	1	1	1	1	1	1	nocov	0	nocov	nocov	0	1	0	1	1	1	1	1	1	1	1
O. sativa	IRIS_313-10695	XI-3	XI-3B1	1	1	1	0	1	1	1	1	1	1	1	1	1	1	1	1	0	1	1	1	1	1	1	1	1	1	1	1	1	1	1	nocov	0	nocov	1	0	1	1	1	1	1	1	1	0	1	1
O. sativa	IRIS_313-10697	XI-3	XI-3A	1	1	1	0	1	nocov	1	1	1	1	1	1	1	1	1	1	0	1	1	1	1	1	1	1	1	1	1	1	1	1	1	1	1	1	1	0	1	0	1	1	1	0	1	1	1	1
O. sativa	IRIS_313-10698	XI-3	XI-3A	1	1	1	0	1	1	1	1	1	1	1	1	1	1	1	1	0	1	1	1	1	1	1	1	1	1	1	1	1	1	1	1	1	1	1	0	1	0	1	1	1	0	1	1	1	1
O. sativa	IRIS_313-10699	XI-3	XI-3A	1	1	1	0	1	1	1	1	1	1	1	1	1	1	1	1	0	1	1	1	1	1	1	1	1	1	1	1	1	1	1	1	1	nocov	0	0	1	0	1	nocov	1	1	1	1	1	1
O. sativa	IRIS_313-10700	XI-3	XI-3A	1	1	1	0	1	1	1	1	1	1	1	1	1	1	1	1	0	1	1	1	1	1	1	1	1	1	1	1	1	1	1	1	1	1	0	0	1	0	1	nocov	1	nocov	1	1	1	1
O. sativa	IRIS_313-10701	XI-3	XI-3A	1	1	1	0	1	1	1	1	1	1	1	1	1	1	1	1	0	1	1	1	1	1	1	1	1	1	1	1	1	1	1	1	1	1	nocov	0	1	0	1	1	1	0	1	1	1	1
O. sativa	IRIS_313-10702	XI-3	XI-3A	1	1	1	0	1	1	1	1	1	1	1	1	1	1	0	1	0	1	1	1	1	1	1	1	1	1	1	1	1	1	1	1	1	0	nocov	0	1	0	1	nocov	1	0	1	1	1	1
O. sativa	IRIS_313-10703	GJ-trp	GJ-trop1	0	1	1	1	0	1	0	0	0	1	0	0	1	0	0	0	0	0	nocov	0	0	0	0	0	0	0	nocov	1	0	nocov	0	0	0	nocov	0	1	0	1	0	nocov	1	0	0	0	0	0
O. sativa	IRIS_313-10704	GJ-trp	GJ-trop1	0	1	0	1	0	nocov	0	0	0	1	0	0	1	0	0	0	0	0	nocov	0	0	0	0	0	0	1	nocov	1	0	nocov	0	0	1	nocov	0	1	0	1	0	0	1	0	0	0	0	0
O. sativa	IRIS_313-10705	XI-adm	XI-adm	1	1	1	1	1	1	1	1	1	1	1	1	1	1	1	1	1	1	1	1	1	1	1	1	1	1	1	1	1	1	1	1	1	1	1	1	0	1	1	1	1	nocov	1	1	1	1
O. sativa	IRIS_313-10706	XI-3	XI-3A	1	1	1	0	1	1	1	1	1	1	1	1	1	1	1	1	0	1	1	1	1	1	1	1	1	1	1	1	1	1	1	1	1	1	nocov	0	1	0	1	nocov	1	0	1	1	1	1
O. sativa	IRIS_313-10707	XI-3	XI-3A	1	1	1	0	1	1	1	1	1	1	1	1	1	1	1	1	0	1	1	1	1	1	1	1	1	1	1	1	1	1	1	1	1	1	0	0	1	0	1	1	1	0	1	1	1	1
O. sativa	IRIS_313-10708	GJ-trp	GJ-trop1	0	0	0	1	0	nocov	0	0	0	1	0	0	1	0	0	0	0	0	0	0	0	0	0	0	0	1	nocov	1	0	nocov	0	0	0	nocov	0	1	0	0	0	0	1	0	0	0	0	0
O. sativa	IRIS_313-10710	GJ-trp	GJ-trop1	0	0	0	1	0	nocov	0	0	0	1	0	0	1	0	0	0	0	0	nocov	0	0	0	0	0	0	0	nocov	1	0	nocov	0	0	0	nocov	0	1	0	1	0	0	0	0	0	0	0	0
O. sativa	IRIS_313-10711	GJ-trp	GJ-trop1	nocov	1	1	1	0	1	nocov	0	0	nocov	0	0	1	nocov	0	0	0	1	0	0	0	0	0	0	0	0	0	1	0	nocov	0	0	0	nocov	0	1	0	0	0	nocov	0	0	1	nocov	0	0
O. sativa	IRIS_313-10712	GJ-trp	GJ-trop1	nocov	1	0	1	0	1	0	0	0	0	0	0	1	nocov	0	0	0	0	0	0	0	0	0	0	0	0	0	1	0	nocov	0	nocov	0	nocov	0	1	0	0	0	nocov	0	nocov	0	0	0	0
O. sativa	IRIS_313-10715	XI-2	XI-2B	1	1	1	0	1	1	1	1	0	1	nocov	1	1	1	1	1	1	1	1	1	1	0	1	1	0	1	nocov	nocov	1	1	0	1	1	1	1	0	nocov	1	1	nocov	1	1	1	1	1	1
O. sativa	IRIS_313-10716	XI-2	XI-2B	1	0	1	0	1	1	1	1	0	1	1	1	1	1	1	1	1	1	1	1	1	0	0	1	1	1	1	1	1	1	1	1	1	1	1	0	nocov	1	1	1	1	1	1	1	1	1
O. sativa	IRIS_313-10717	XI-2	XI-2B	1	1	1	0	1	1	1	1	1	1	1	1	1	1	1	1	1	1	1	1	1	1	1	1	1	0	1	1	1	1	1	1	1	1	nocov	0	0	1	1	nocov	1	1	1	1	1	1
O. sativa	IRIS_313-10718	cA(Aus)	cA2	1	1	1	0	1	1	1	1	0	0	nocov	nocov	1	nocov	1	1	1	0	0	0	1	nocov	0	0	0	0	0	nocov	0	nocov	0	nocov	0	nocov	nocov	1	nocov	0	0	nocov	0	nocov	0	nocov	0	0
O. sativa	IRIS_313-10719	XI-2	XI-2B	1	0	1	0	1	1	1	1	1	1	1	1	1	1	1	1	1	1	1	1	1	1	nocov	1	1	0	1	1	1	1	1	1	1	0	1	0	0	1	0	1	1	1	1	1	1	1
O. sativa	IRIS_313-10720	XI-adm	XI-adm	1	1	1	nocov	1	1	1	0	1	1	1	1	1	1	1	1	1	1	1	1	0	1	1	1	1	1	1	1	1	1	1	0	1	1	1	0	1	1	nocov	nocov	0	1	1	1	1	1
O. sativa	IRIS_313-10721	XI-2	XI-2B	1	1	1	0	1	1	1	1	0	1	1	1	1	nocov	1	1	1	1	1	1	1	1	0	1	1	0	1	1	1	1	1	1	1	1	1	0	nocov	1	1	1	1	1	1	1	1	1
O. sativa	IRIS_313-10722	GJ-trp	GJ-trop1	0	0	0	1	0	nocov	0	0	0	0	0	0	1	0	0	0	0	0	nocov	0	0	0	0	0	0	0	nocov	1	0	nocov	nocov	0	0	nocov	0	1	0	0	0	nocov	1	0	0	0	0	0
O. sativa	IRIS_313-10723	XI-2	XI-2A	1	0	1	0	1	1	1	1	1	1	1	1	1	nocov	1	1	0	1	1	1	1	1	1	1	1	1	1	1	1	1	1	1	0	1	0	0	0	1	1	1	1	1	1	1	1	1
O. sativa	IRIS_313-10724	XI-3	XI-3B1	1	1	1	0	1	1	1	1	1	1	1	1	1	1	1	1	0	1	1	1	1	1	1	1	1	1	1	1	1	1	1	0	0	1	1	0	1	0	1	nocov	1	1	1	1	1	1
O. sativa	IRIS_313-10725	XI-adm	XI-adm	1	1	1	0	1	1	1	1	1	1	1	1	1	1	1	1	1	1	1	1	1	1	1	1	1	1	1	1	1	1	1	0	1	1	1	0	1	1	1	0	1	1	1	1	1	1
O. sativa	IRIS_313-10726	XI-3	XI-3	1	1	1	0	1	1	1	1	1	1	1	1	1	1	1	1	0	1	1	0	1	1	1	1	1	1	1	1	1	1	1	1	0	1	1	0	1	1	1	nocov	1	1	1	1	1	1
O. sativa	IRIS_313-10727	XI-3	XI-3B1	1	1	1	0	1	1	1	1	1	1	1	1	1	nocov	1	1	0	1	1	1	1	1	1	1	1	1	1	1	1	1	1	1	0	1	1	0	1	1	1	1	1	nocov	1	1	1	1
O. sativa	IRIS_313-10728	XI-adm	XI-adm	1	1	1	0	1	1	1	1	1	1	1	1	1	1	1	1	0	1	1	1	1	1	1	1	1	1	1	1	1	1	1	1	0	1	1	0	0	1	1	nocov	1	nocov	1	1	1	1
O. sativa	IRIS_313-10729	admix	admix	0	1	nocov	0	0	0	1	0	0	0	nocov	0	0	0	0	1	0	0	nocov	0	0	1	0	0	0	0	nocov	1	0	0	0	0	0	nocov	0	0	1	0	0	nocov	0	nocov	0	0	0	nocov
O. sativa	IRIS_313-10730	GJ-trp	GJ-trop1	0	1	0	1	0	nocov	0	0	0	0	nocov	0	1	0	0	0	0	0	nocov	0	0	0	nocov	0	0	1	nocov	nocov	0	nocov	0	0	0	nocov	0	1	0	0	0	0	nocov	0	0	0	0	0
O. sativa	IRIS_313-10731	XI-1A	XI-1A	1	1	1	0	1	1	1	1	1	1	1	1	1	nocov	1	1	1	1	1	1	1	1	1	1	1	1	1	1	1	1	1	1	0	1	1	0	0	1	1	1	1	1	1	1	1	1
O. sativa	IRIS_313-10732	cB(Bas)	cB	1	1	1	1	0	nocov	0	0	0	0	0	0	1	1	1	0	0	0	nocov	0	0	0	nocov	0	0	0	nocov	1	1	0	0	0	0	nocov	0	0	0	0	1	0	1	0	0	0	0	0
O. sativa	IRIS_313-10733	XI-adm	XI-adm	1	1	1	0	1	1	1	1	1	1	1	1	1	1	1	1	1	1	1	1	1	1	1	1	1	1	1	1	1	1	1	1	1	nocov	1	0	0	1	1	1	1	1	1	1	1	1
O. sativa	IRIS_313-10734	cA(Aus)	cA1	1	1	1	0	1	1	1	1	1	0	0	nocov	1	0	1	1	1	0	1	1	1	1	0	0	0	0	nocov	1	1	0	0	0	0	1	nocov	0	1	0	0	nocov	1	1	1	1	0	1
O. sativa	IRIS_313-10735	cA(Aus)	cA1	1	1	1	0	1	1	1	1	1	nocov	1	1	1	1	1	1	1	0	1	1	1	1	nocov	0	0	0	nocov	1	1	0	0	0	0	1	nocov	0	1	1	1	nocov	1	1	1	1	0	1
O. sativa	IRIS_313-10736	cA(Aus)	cA1	1	1	1	0	1	nocov	1	1	1	0	0	1	1	1	1	1	1	0	1	1	1	1	0	0	0	0	nocov	1	1	0	0	0	0	1	nocov	0	1	1	0	nocov	nocov	1	1	1	0	1
O. sativa	IRIS_313-10737	cA(Aus)	cA1	1	1	1	0	1	1	1	1	1	0	0	nocov	1	1	1	1	1	0	1	1	1	1	0	1	0	0	nocov	1	1	0	0	0	0	1	nocov	0	1	0	1	0	1	1	1	1	0	0
O. sativa	IRIS_313-10738	admix	GJ-trop	1	1	1	1	0	1	0	nocov	0	0	1	1	nocov	1	0	0	0	0	nocov	1	0	1	1	0	0	1	1	1	0	1	1	1	0	nocov	1	0	1	0	1	1	1	1	1	0	1	0
O. sativa	IRIS_313-10739	XI-adm	XI-adm	1	1	1	0	1	1	1	1	0	1	1	1	1	nocov	1	1	0	1	1	1	1	1	1	1	1	1	1	1	1	1	1	1	1	nocov	1	0	1	1	1	1	1	nocov	1	1	1	1
O. sativa	IRIS_313-10740	GJ-trp	GJ-trop2	0	nocov	1	1	0	nocov	0	0	0	0	0	0	nocov	0	0	0	0	0	nocov	0	0	0	0	0	0	0	nocov	1	0	nocov	0	0	0	nocov	0	1	0	0	1	1	nocov	0	0	0	0	0
O. sativa	IRIS_313-10741	GJ-trp	GJ-trop2	0	0	1	1	0	nocov	0	0	0	0	0	0	nocov	0	0	0	0	0	nocov	0	0	0	0	0	0	0	nocov	1	0	nocov	0	0	0	nocov	0	1	0	0	1	1	0	0	0	0	0	0
O. sativa	IRIS_313-10742	XI-3	XI-3A	1	1	1	0	1	1	1	1	1	1	1	1	1	1	1	1	0	1	1	1	1	1	1	1	1	1	1	1	1	1	1	1	1	1	0	0	1	0	1	1	1	nocov	1	1	1	1
O. sativa	IRIS_313-10743	GJ-trp	GJ-trop1	0	0	0	1	0	nocov	0	0	0	1	0	0	1	nocov	0	0	0	0	0	0	0	0	0	0	0	1	nocov	1	1	nocov	0	1	0	nocov	0	1	0	1	0	nocov	0	0	0	0	0	0
O. sativa	IRIS_313-10744	GJ-trp	GJ-trop2	0	0	1	1	0	1	0	0	0	0	0	0	nocov	0	0	0	0	0	nocov	0	0	0	0	0	0	0	1	1	0	nocov	0	0	0	nocov	0	1	0	0	1	1	0	0	0	0	0	0
O. sativa	IRIS_313-10745	GJ-trp	GJ-trop2	0	0	0	1	0	nocov	0	0	0	0	0	0	nocov	0	0	0	0	0	0	0	0	nocov	0	0	0	0	nocov	1	0	nocov	0	0	0	nocov	0	1	0	0	1	1	0	0	0	nocov	0	0
O. sativa	IRIS_313-10746	GJ-trp	GJ-trop2	0	0	0	1	0	nocov	0	0	0	1	0	0	nocov	0	0	0	0	0	nocov	0	0	0	0	0	0	0	0	nocov	0	nocov	0	0	0	nocov	0	1	0	0	0	1	0	0	0	0	0	0
O. sativa	IRIS_313-10747	GJ-trp	GJ-trop1	0	1	0	1	0	nocov	0	0	0	1	0	0	1	0	0	0	0	0	nocov	0	0	0	0	0	0	1	nocov	1	0	nocov	0	0	0	nocov	0	1	0	1	0	nocov	0	0	0	0	0	0
O. sativa	IRIS_313-10748	XI-adm	XI-3B2	1	1	1	0	1	1	1	1	1	1	1	1	1	1	1	1	0	1	1	1	1	1	1	1	1	1	1	1	1	1	1	1	1	1	nocov	0	1	0	1	1	1	1	1	0	1	1
O. sativa	IRIS_313-10749	XI-3	XI-3B1	1	1	1	0	1	1	1	1	1	1	1	1	1	1	1	1	0	1	1	1	1	1	1	1	1	1	1	1	1	1	1	nocov	1	1	nocov	0	1	0	1	1	1	nocov	1	1	1	1
O. sativa	IRIS_313-10750	XI-3	XI-3B1	1	1	1	0	1	1	1	1	1	1	1	1	1	1	1	1	0	1	1	1	1	1	1	1	1	1	1	1	1	1	1	nocov	0	nocov	0	0	1	0	1	nocov	1	nocov	1	1	1	1
O. sativa	IRIS_313-10751	XI-adm	XI-3B	1	1	1	0	1	1	1	1	1	1	1	1	1	1	1	1	0	1	1	1	1	1	1	1	1	1	1	1	1	1	0	1	1	nocov	nocov	0	0	1	1	1	1	nocov	0	1	1	1
O. sativa	IRIS_313-10752	GJ-trp	GJ-trop1	0	0	0	1	0	nocov	0	0	0	1	0	0	1	0	0	0	0	0	nocov	0	0	0	0	0	0	1	nocov	1	0	nocov	0	0	0	nocov	0	1	0	0	0	nocov	1	0	1	0	0	0
O. sativa	IRIS_313-10753	XI-1B	XI-1B2	0	1	1	0	1	1	1	1	1	0	1	0	1	1	1	1	1	1	1	1	1	1	1	1	1	1	nocov	1	1	1	1	1	1	1	1	1	1	0	1	1	1	1	1	1	0	1
O. sativa	IRIS_313-10754	XI-adm	XI-1	1	1	1	0	1	1	1	1	1	1	1	1	1	1	1	1	1	0	1	1	1	1	1	1	1	1	1	1	1	1	1	1	1	1	1	0	0	0	1	1	1	1	1	1	1	1
O. sativa	IRIS_313-10755	XI-3	XI-3B1	1	1	1	0	1	1	1	1	1	1	1	1	1	1	1	1	0	1	1	1	1	1	1	1	1	1	1	1	1	1	1	0	1	1	nocov	0	1	0	1	nocov	1	nocov	0	1	1	1
O. sativa	IRIS_313-10756	XI-2	XI-2A	1	0	1	0	1	1	1	1	1	1	1	1	1	1	1	1	1	1	1	1	1	1	1	1	1	1	1	1	1	1	1	1	1	1	1	0	0	0	1	nocov	1	1	0	1	0	1
O. sativa	IRIS_313-10757	XI-3	XI-3A	1	1	1	0	1	nocov	1	1	1	1	1	1	1	1	1	1	0	1	1	1	1	1	1	1	1	1	1	1	1	1	1	0	1	1	nocov	0	1	1	1	nocov	1	1	1	1	1	1
O. sativa	IRIS_313-10758	GJ-trp	GJ-trop1	0	0	0	1	0	nocov	0	0	0	1	0	0	1	0	0	0	0	0	0	0	1	0	0	0	0	1	nocov	0	0	nocov	0	0	0	nocov	0	1	0	0	1	0	0	0	0	0	0	0
O. sativa	IRIS_313-10759	GJ-trp	GJ-trop2	0	0	1	1	0	nocov	nocov	0	0	0	0	0	nocov	nocov	0	0	0	0	nocov	0	0	0	0	0	0	0	nocov	1	0	nocov	0	0	0	nocov	0	1	0	0	1	1	nocov	0	0	0	0	0
O. sativa	IRIS_313-10760	XI-3	XI-3A	1	1	1	0	1	1	1	1	1	1	1	1	1	1	1	1	0	1	1	1	1	1	1	1	1	1	1	1	1	1	1	0	1	1	1	0	1	1	1	nocov	1	nocov	1	1	1	1
O. sativa	IRIS_313-10761	GJ-trp	GJ-trop2	nocov	0	1	1	0	nocov	0	0	0	0	0	0	nocov	0	0	0	0	0	nocov	0	0	0	0	0	0	0	1	1	0	nocov	0	0	0	nocov	0	1	0	0	1	1	0	0	0	0	0	0
O. sativa	IRIS_313-10762	XI-3	XI-3A	1	1	1	0	1	1	1	1	1	1	1	1	1	1	1	1	0	1	1	1	1	1	1	1	1	1	1	1	1	1	1	1	0	nocov	nocov	0	1	0	1	1	1	nocov	1	1	1	1
O. sativa	IRIS_313-10765	GJ-trp	GJ-trop2	0	1	1	1	0	nocov	0	0	0	0	0	0	nocov	0	0	0	0	1	nocov	0	0	0	0	0	0	0	1	nocov	1	nocov	0	0	0	nocov	0	1	0	0	0	1	0	0	0	0	0	0
O. sativa	IRIS_313-10766	GJ-trp	GJ-trop2	0	0	1	1	0	nocov	0	0	0	0	0	0	nocov	0	0	0	0	0	nocov	0	0	0	0	0	0	0	nocov	1	0	nocov	0	0	0	nocov	0	1	0	0	1	1	0	0	0	0	0	0
O. sativa	IRIS_313-10767	GJ-trp	GJ-trop2	0	0	1	1	0	nocov	0	0	0	0	0	0	nocov	0	0	0	0	0	nocov	0	0	0	0	0	0	0	1	1	1	nocov	0	0	0	nocov	0	1	0	0	1	1	0	0	0	0	0	0
O. sativa	IRIS_313-10768	XI-3	XI-3A	1	0	1	0	1	1	1	1	1	1	1	1	1	nocov	0	1	0	1	1	1	1	1	1	1	1	1	1	1	1	1	1	1	1	1	1	0	1	0	1	nocov	1	1	1	1	1	1
O. sativa	IRIS_313-10769	XI-adm	XI-adm	1	1	1	0	1	1	1	1	1	1	1	1	1	1	1	1	0	1	1	1	1	1	1	1	1	1	nocov	1	1	1	1	1	1	1	1	0	1	0	1	1	1	0	1	1	1	1
O. sativa	IRIS_313-10770	GJ-trp	GJ-trop2	0	0	0	1	0	nocov	0	0	0	0	0	0	nocov	nocov	0	0	0	0	nocov	0	0	0	0	0	0	0	1	1	0	nocov	0	0	0	nocov	0	1	0	0	1	1	0	0	0	nocov	0	0
O. sativa	IRIS_313-10771	GJ-trp	GJ-trop	0	1	1	1	1	1	1	1	1	1	1	1	1	1	1	1	0	1	1	1	1	1	0	0	1	1	nocov	1	1	1	1	1	1	1	1	1	1	1	1	1	1	1	1	1	1	1
O. sativa	IRIS_313-10772	XI-3	XI-3A	1	1	1	0	1	1	1	1	1	1	1	1	1	1	1	1	0	1	1	1	1	1	1	1	1	1	1	1	1	1	1	1	1	1	1	0	1	0	1	1	1	1	1	1	1	1
O. sativa	IRIS_313-10773	GJ-trp	GJ-trop2	nocov	0	1	1	0	nocov	0	0	0	0	0	0	nocov	0	0	0	0	0	nocov	0	0	0	0	0	0	0	nocov	1	0	nocov	0	0	0	nocov	0	1	0	0	1	1	0	0	nocov	0	0	0
O. sativa	IRIS_313-10774	XI-adm	XI-adm	1	1	1	0	1	1	1	1	1	1	1	1	1	1	1	1	0	1	1	1	1	1	1	1	1	1	1	1	1	1	1	1	1	1	1	0	1	0	1	1	1	1	1	1	1	1
O. sativa	IRIS_313-10775	XI-adm	XI-adm	1	1	1	0	1	1	1	1	1	1	1	1	1	1	1	1	0	0	1	1	1	1	1	1	1	1	1	1	1	1	1	1	1	nocov	1	0	1	0	1	1	1	1	1	1	1	1
O. sativa	IRIS_313-10776	GJ-trp	GJ-trop1	0	0	nocov	1	0	nocov	0	0	0	1	0	0	1	nocov	0	0	0	0	nocov	0	0	0	0	0	0	1	nocov	1	0	nocov	0	0	nocov	nocov	0	1	0	0	0	nocov	0	0	1	nocov	0	0
O. sativa	IRIS_313-10777	XI-3	XI-3A	1	1	1	0	1	1	1	1	1	1	1	1	1	0	1	1	0	1	1	1	1	1	1	1	1	1	1	1	1	1	1	0	1	1	1	1	1	0	1	1	1	0	1	1	1	1
O. sativa	IRIS_313-10778	XI-3	XI-3A	1	1	1	0	1	1	1	1	1	1	1	1	1	1	1	1	0	1	1	1	1	1	1	1	1	1	1	1	1	1	1	1	1	1	1	1	1	0	1	nocov	1	0	1	1	1	1
O. sativa	IRIS_313-10779	XI-3	XI-3A	1	1	1	0	1	1	1	1	1	1	1	1	1	1	0	1	0	1	1	1	1	1	1	1	1	1	1	1	1	1	1	1	1	1	1	0	1	0	1	nocov	1	1	1	1	1	1
O. sativa	IRIS_313-10780	GJ-trp	GJ-trop2	nocov	0	1	1	0	nocov	nocov	0	0	0	0	0	nocov	0	0	0	0	0	nocov	0	0	0	nocov	0	0	0	nocov	nocov	0	nocov	0	0	0	nocov	0	1	0	0	0	1	0	0	0	0	0	0
O. sativa	IRIS_313-10781	GJ-trp	GJ-trop2	0	0	1	1	0	nocov	nocov	0	0	1	0	0	nocov	0	0	0	0	0	nocov	0	0	0	nocov	0	0	0	nocov	nocov	1	nocov	0	0	0	nocov	0	1	0	0	0	1	0	0	0	0	0	0
O. sativa	IRIS_313-10782	XI-3	XI-3A	1	1	1	0	1	1	1	1	1	1	1	1	1	1	1	1	0	1	1	1	1	1	1	1	1	1	1	1	1	1	1	0	1	1	nocov	0	1	0	1	1	1	1	1	1	1	1
O. sativa	IRIS_313-10783	GJ-trp	GJ-trop2	0	0	1	1	0	nocov	0	0	0	1	0	0	nocov	0	0	0	0	1	nocov	0	0	0	0	0	0	0	1	1	0	nocov	0	0	0	nocov	0	1	0	0	1	1	0	0	0	nocov	0	0
O. sativa	IRIS_313-10784	GJ-trp	GJ-trop2	0	0	1	1	0	1	0	0	0	0	0	0	nocov	0	0	0	0	0	nocov	0	0	0	0	0	0	0	nocov	1	0	nocov	0	0	0	nocov	0	1	0	0	1	1	0	0	nocov	0	0	0
O. sativa	IRIS_313-10785	GJ-trp	GJ-trop2	0	0	1	1	0	nocov	0	0	0	0	0	0	nocov	0	0	0	0	0	nocov	0	0	0	nocov	0	0	0	nocov	1	1	nocov	0	0	0	nocov	0	1	0	0	1	1	0	0	0	0	0	0
O. sativa	IRIS_313-10786	XI-3	XI-3A	1	nocov	1	1	1	1	1	1	1	1	1	1	1	nocov	0	1	0	0	1	1	1	1	1	1	1	1	1	1	1	1	1	1	0	nocov	1	1	1	0	1	1	1	1	1	0	1	1
O. sativa	IRIS_313-10787	XI-3	XI-3A	1	0	1	1	1	1	1	1	1	1	1	1	1	1	0	1	0	1	1	1	1	1	1	1	1	1	1	1	1	1	1	1	0	1	0	1	1	0	1	1	1	0	1	1	1	1
O. sativa	IRIS_313-10788	GJ-trp	GJ-trop2	0	nocov	0	1	0	nocov	0	0	0	0	0	0	nocov	0	0	0	0	0	nocov	0	0	0	0	0	0	0	1	1	0	nocov	0	0	0	nocov	0	1	0	0	1	1	0	0	0	nocov	0	0
O. sativa	IRIS_313-10789	GJ-trp	GJ-trop2	1	1	0	1	0	nocov	0	0	0	0	0	0	nocov	0	0	0	0	0	nocov	0	0	0	0	0	0	0	nocov	1	0	nocov	0	0	0	nocov	0	1	0	0	1	1	0	0	0	0	0	0
O. sativa	IRIS_313-10790	GJ-trp	GJ-trop2	0	0	0	1	0	1	0	0	0	1	0	0	nocov	0	0	0	0	1	nocov	0	0	1	0	0	0	0	nocov	1	1	1	1	0	0	nocov	0	1	0	0	1	1	nocov	0	0	0	0	0
O. sativa	IRIS_313-10791	XI-3	XI-3A	1	1	1	0	1	1	1	1	1	1	1	1	1	0	1	1	0	1	1	1	1	1	1	1	1	1	1	1	1	1	1	0	1	1	1	1	1	0	1	1	1	0	1	1	1	1
O. sativa	IRIS_313-10792	XI-3	XI-3A	1	1	1	0	1	1	1	1	1	1	1	1	1	1	1	1	0	1	1	1	1	1	1	1	1	1	1	1	1	1	1	1	1	nocov	1	0	1	0	1	1	1	0	1	1	1	1
O. sativa	IRIS_313-10793	GJ-trp	GJ-trop1	0	0	1	1	0	nocov	0	0	0	1	0	0	1	0	0	0	0	0	nocov	0	0	0	0	0	0	1	nocov	1	0	nocov	0	1	0	nocov	0	1	0	1	0	nocov	0	0	0	0	0	0
O. sativa	IRIS_313-10794	GJ-trp	GJ-trop1	0	1	0	1	0	nocov	nocov	0	0	1	nocov	0	1	0	0	0	0	0	nocov	0	0	0	0	0	0	0	nocov	1	0	nocov	0	0	0	nocov	0	1	0	1	0	nocov	0	0	1	0	0	0
O. sativa	IRIS_313-10795	GJ-trp	GJ-trop1	0	0	0	1	0	nocov	0	0	0	1	0	0	1	0	0	0	0	0	nocov	0	0	0	0	0	0	1	nocov	1	0	nocov	0	0	0	nocov	0	1	0	1	0	0	0	0	0	0	0	0
O. sativa	IRIS_313-10796	GJ-trp	GJ-trop1	0	0	0	1	0	nocov	nocov	0	0	1	nocov	0	1	0	0	0	0	0	nocov	0	0	0	0	0	0	1	nocov	1	0	nocov	0	1	0	nocov	0	1	0	1	0	nocov	0	0	0	nocov	0	0
O. sativa	IRIS_313-10797	XI-3	XI-3A	1	1	1	0	1	1	1	1	1	1	1	1	1	1	0	1	0	1	1	1	1	1	1	1	1	1	1	1	1	1	1	1	1	1	0	0	1	0	1	1	1	1	1	1	1	1
O. sativa	IRIS_313-10798	GJ-trp	GJ-trop1	0	0	0	1	0	nocov	0	0	0	0	0	0	1	0	0	0	0	0	nocov	0	0	0	0	0	0	1	nocov	1	0	nocov	0	0	0	nocov	0	1	0	0	0	nocov	0	0	1	0	0	0
O. sativa	IRIS_313-10799	GJ-trp	GJ-trop1	0	0	0	1	0	1	0	0	0	1	0	0	1	0	0	0	0	0	nocov	0	0	0	0	0	0	1	nocov	1	0	nocov	0	0	0	nocov	0	1	0	0	1	nocov	0	0	0	0	0	0
O. sativa	IRIS_313-10800	GJ-trp	GJ-trop2	0	0	1	1	0	nocov	nocov	0	0	0	0	0	nocov	0	0	0	0	0	nocov	0	0	0	0	0	0	0	nocov	1	0	nocov	0	0	0	nocov	0	1	0	0	1	1	nocov	0	nocov	0	0	0
O. sativa	IRIS_313-10801	GJ-trp	GJ-trop2	0	0	0	1	0	nocov	0	0	0	0	0	0	nocov	0	0	0	0	0	nocov	0	0	0	0	0	0	0	nocov	nocov	0	nocov	0	0	0	nocov	0	1	0	0	1	1	0	0	0	0	0	0
O. sativa	IRIS_313-10802	GJ-trp	GJ-trop2	1	0	0	1	0	nocov	0	0	0	0	nocov	0	nocov	0	0	0	0	0	nocov	0	0	0	0	0	0	0	nocov	1	1	nocov	0	0	0	nocov	0	1	0	0	1	1	0	0	0	0	0	0
O. sativa	IRIS_313-10803	GJ-trp	GJ-trop2	0	0	nocov	1	0	nocov	0	0	0	0	0	0	nocov	0	0	0	0	0	nocov	0	0	0	0	0	0	0	1	nocov	1	nocov	0	0	0	nocov	0	1	0	0	0	1	0	0	0	nocov	0	0
O. sativa	IRIS_313-10804	XI-3	XI-3A	1	0	1	0	1	1	1	1	1	1	1	1	1	1	0	1	0	1	1	1	1	1	1	1	1	1	1	1	1	1	1	1	0	0	nocov	0	1	0	1	1	1	nocov	1	1	1	1
O. sativa	IRIS_313-10805	GJ-trp	GJ-trop2	0	nocov	0	1	0	nocov	nocov	0	0	1	0	0	nocov	0	0	0	0	0	nocov	0	0	0	0	0	0	0	1	1	0	nocov	0	0	0	nocov	0	1	0	0	1	1	0	0	0	0	0	0
O. sativa	IRIS_313-10806	XI-3	XI-3A	1	0	1	0	1	1	1	1	1	1	1	1	1	1	0	1	0	1	1	1	1	1	1	1	1	1	1	1	1	1	1	1	1	1	nocov	0	1	0	1	1	1	0	1	1	1	1
O. sativa	IRIS_313-10807	XI-3	XI-3A	1	0	1	0	1	1	1	1	1	1	1	1	1	1	0	1	0	1	1	1	1	1	1	1	1	1	1	1	1	1	1	nocov	0	1	1	0	1	0	1	nocov	1	1	1	1	1	1
O. sativa	IRIS_313-10808	GJ-trp	GJ-trop2	0	1	0	1	0	1	0	0	0	0	0	0	nocov	0	0	0	0	0	nocov	0	0	0	0	0	0	0	nocov	1	0	nocov	0	0	0	nocov	0	1	0	0	1	1	0	0	0	nocov	0	0
O. sativa	IRIS_313-10809	GJ-trp	GJ-trop2	0	1	1	1	0	nocov	0	0	0	0	0	0	nocov	0	0	0	0	1	nocov	0	0	0	0	0	0	0	1	1	1	nocov	0	0	0	nocov	0	1	0	0	0	1	0	0	0	1	0	0
O. sativa	IRIS_313-10810	XI-3	XI-3A	1	1	1	0	1	1	1	1	1	1	1	1	1	1	1	1	1	1	1	1	1	1	1	1	1	1	1	1	1	1	1	1	1	1	1	0	1	0	1	1	1	0	1	1	1	1
O. sativa	IRIS_313-10811	XI-adm	XI-adm	1	1	1	0	1	1	1	1	1	1	1	1	1	1	1	1	1	1	1	1	1	1	1	1	1	1	1	1	1	1	1	1	1	1	1	0	0	0	1	1	1	0	1	1	1	1
O. sativa	IRIS_313-10812	XI-3	XI-3A	1	1	1	0	1	1	1	1	1	1	1	1	1	1	1	1	0	1	1	1	1	1	1	1	1	1	1	1	1	1	1	1	1	1	1	0	1	0	1	1	1	1	1	1	1	1
O. sativa	IRIS_313-10813	XI-3	XI-3A	1	0	1	0	1	1	1	1	1	1	1	1	1	1	1	1	0	1	1	1	1	1	1	1	1	1	1	1	1	1	1	1	1	1	nocov	1	1	0	1	nocov	1	1	1	1	1	1
O. sativa	IRIS_313-10814	XI-3	XI-3A	1	1	1	0	1	1	1	1	1	1	1	1	1	1	1	1	0	1	1	1	1	1	1	1	1	1	1	1	1	1	1	0	0	1	1	0	1	0	1	nocov	1	1	1	1	1	1
O. sativa	IRIS_313-10815	GJ-trp	GJ-trop2	0	0	1	1	0	nocov	nocov	0	0	0	0	0	nocov	0	0	0	0	0	nocov	0	0	0	0	0	0	0	1	1	0	nocov	0	0	0	nocov	0	1	0	0	1	1	nocov	0	0	1	0	0
O. sativa	IRIS_313-10816	GJ-trp	GJ-trop2	0	0	1	1	0	nocov	0	0	0	0	0	0	nocov	0	0	0	0	0	nocov	0	0	0	0	0	0	0	nocov	1	0	nocov	0	0	0	nocov	0	1	0	0	1	1	0	0	0	0	0	0
O. sativa	IRIS_313-10817	GJ-trp	GJ-trop2	0	0	1	1	0	nocov	0	0	0	0	nocov	0	nocov	0	0	0	0	1	nocov	0	0	0	0	0	0	0	nocov	nocov	1	nocov	0	0	0	nocov	0	1	0	0	0	1	0	0	0	0	0	0
O. sativa	IRIS_313-10818	XI-3	XI-3A	1	1	1	0	1	1	1	1	1	1	1	1	1	1	1	0	0	0	1	1	1	1	1	1	1	1	1	1	1	1	1	1	0	1	nocov	0	1	0	1	nocov	1	0	1	1	1	1
O. sativa	IRIS_313-10819	XI-3	XI-3A	1	1	1	0	1	1	1	1	1	1	1	1	1	1	1	1	0	0	1	1	1	1	1	1	1	1	1	1	1	1	1	1	1	1	1	0	1	0	1	1	1	nocov	1	1	1	0
O. sativa	IRIS_313-10820	XI-3	XI-3A	1	1	1	0	1	1	1	1	1	1	1	1	1	1	1	1	0	1	1	1	1	1	1	1	1	1	1	1	1	1	1	1	1	1	1	0	1	0	1	1	1	0	1	1	1	1
O. sativa	IRIS_313-10821	XI-3	XI-3A	1	1	1	0	1	1	1	1	1	1	1	1	1	1	1	1	0	1	1	1	1	1	0	1	1	1	nocov	1	1	1	1	1	1	1	nocov	0	1	0	1	nocov	1	nocov	1	1	1	1
O. sativa	IRIS_313-10822	XI-3	XI-3A	1	1	1	0	1	1	1	1	1	1	1	1	1	1	1	1	0	1	1	1	1	1	1	1	1	1	1	1	1	1	1	0	1	nocov	1	0	1	0	1	nocov	1	1	1	1	1	1
O. sativa	IRIS_313-10823	XI-3	XI-3A	1	1	1	0	1	1	1	1	1	1	1	1	1	1	1	1	0	1	1	1	1	1	1	1	1	1	1	1	1	1	1	1	0	1	1	0	1	0	1	1	1	nocov	1	1	1	1
O. sativa	IRIS_313-10824	XI-3	XI-3A	1	0	1	0	1	1	1	1	1	1	1	1	1	1	1	1	0	1	1	1	1	1	1	1	1	1	1	1	1	1	1	1	1	1	1	0	1	0	1	1	1	1	1	1	1	1
O. sativa	IRIS_313-10825	XI-adm	XI-adm	1	1	1	0	1	1	1	1	1	1	1	1	1	1	1	1	0	1	1	1	1	1	1	1	1	1	1	1	1	1	1	1	0	1	1	0	1	1	1	1	1	1	1	1	1	1
O. sativa	IRIS_313-10827	GJ-trp	GJ-trop1	0	0	0	1	0	nocov	0	0	0	1	0	0	1	0	0	0	0	0	nocov	0	0	0	0	0	0	1	nocov	1	0	nocov	0	0	0	nocov	0	1	0	1	0	0	1	0	1	0	0	0
O. sativa	IRIS_313-10828	GJ-trp	GJ-trop1	0	0	0	1	0	nocov	0	0	0	1	0	0	1	0	0	0	0	0	nocov	0	0	0	nocov	0	0	0	nocov	1	0	nocov	0	0	0	nocov	0	1	0	0	0	nocov	1	0	0	0	0	0
O. sativa	IRIS_313-10829	GJ-trp	GJ-trop1	0	0	0	1	0	nocov	0	0	0	1	0	0	1	nocov	0	0	0	0	nocov	0	0	0	nocov	0	0	0	nocov	1	0	nocov	0	0	0	nocov	0	1	0	1	1	0	1	0	1	0	0	0
O. sativa	IRIS_313-10830	GJ-trp	GJ-trop1	0	0	0	1	0	nocov	0	0	0	1	0	0	1	nocov	0	0	0	0	nocov	0	0	0	nocov	0	0	1	nocov	1	0	nocov	0	0	0	nocov	0	1	0	1	0	0	1	0	1	nocov	0	0
O. sativa	IRIS_313-10831	GJ-trp	GJ-trop1	0	0	0	1	0	nocov	0	0	0	1	nocov	0	1	0	0	0	0	0	nocov	0	0	0	0	0	0	0	nocov	1	0	nocov	0	0	0	nocov	0	1	0	1	0	0	1	0	1	0	0	0
O. sativa	IRIS_313-10832	GJ-trp	GJ-trop1	0	0	0	1	0	nocov	0	0	0	1	0	0	1	nocov	0	0	0	0	nocov	0	0	0	0	0	0	1	nocov	1	0	nocov	0	0	0	nocov	0	1	0	1	0	nocov	0	0	1	0	0	0
O. sativa	IRIS_313-10833	XI-2	XI-2B	1	1	1	0	1	1	1	1	0	1	1	1	1	1	1	1	1	1	1	1	1	1	1	1	1	1	nocov	1	1	1	1	1	1	1	0	0	0	1	1	nocov	1	1	1	1	1	1
O. sativa	IRIS_313-10834	GJ-sbtrp	GJ-subtrp	0	nocov	0	1	0	nocov	0	0	0	0	0	0	1	0	0	0	0	0	nocov	0	0	0	0	0	0	0	nocov	1	0	nocov	0	0	0	nocov	0	1	0	0	1	0	0	0	0	0	0	0
O. sativa	IRIS_313-10835	XI-2	XI-2B	1	0	1	0	1	1	1	1	0	1	1	1	1	0	1	1	1	1	1	1	1	1	1	0	1	1	1	1	1	1	1	1	0	1	1	0	0	1	0	1	1	nocov	1	1	1	1
O. sativa	IRIS_313-10836	XI-2	XI-2B	1	0	1	0	1	1	1	1	0	1	1	1	1	0	1	1	1	1	1	1	1	1	1	0	1	1	1	1	1	1	1	0	0	1	0	0	0	1	1	1	1	nocov	1	0	1	1
O. sativa	IRIS_313-10837	GJ-tmp	GJ-temp	0	0	0	1	0	nocov	0	1	0	0	0	0	1	0	0	0	0	0	0	0	0	0	0	0	0	0	nocov	0	0	0	0	0	0	nocov	0	1	0	0	0	nocov	0	0	0	0	0	0
O. sativa	IRIS_313-10838	GJ-tmp	GJ-temp	0	nocov	0	1	0	nocov	0	0	0	0	0	0	1	0	0	0	0	0	nocov	0	0	0	nocov	0	0	0	nocov	0	0	nocov	0	0	0	1	0	1	0	0	0	0	0	0	0	0	0	0
O. sativa	IRIS_313-10839	GJ-tmp	GJ-temp	0	0	0	1	0	nocov	0	0	0	0	0	0	1	0	0	0	0	0	nocov	0	0	0	0	0	0	0	nocov	0	0	0	0	0	0	nocov	0	1	0	0	0	0	0	0	0	0	0	0
O. sativa	IRIS_313-10840	GJ-tmp	GJ-temp	0	0	0	1	0	nocov	0	0	0	0	0	0	1	0	0	0	0	0	nocov	0	0	0	0	0	0	0	nocov	nocov	0	0	0	0	0	0	0	1	0	0	0	nocov	0	0	0	nocov	0	0
O. sativa	IRIS_313-10841	GJ-trp	GJ-trop2	0	1	1	1	0	nocov	0	0	0	0	0	0	nocov	0	0	0	0	0	nocov	0	0	0	0	0	0	0	nocov	1	0	nocov	0	0	0	nocov	0	1	0	0	1	1	nocov	0	0	0	0	0
O. sativa	IRIS_313-10842	XI-3	XI-3A	1	0	1	0	1	nocov	1	1	1	1	1	1	1	1	0	1	0	1	1	1	1	1	1	1	1	1	1	1	1	1	1	1	0	1	1	0	1	0	1	1	1	nocov	1	1	1	1
O. sativa	IRIS_313-10844	XI-3	XI-3A	1	0	1	0	1	1	1	1	1	1	1	1	1	1	0	1	0	1	1	1	1	1	1	1	1	1	1	1	1	1	1	1	0	1	1	0	1	0	1	1	1	nocov	1	1	1	1
O. sativa	IRIS_313-10845	cA(Aus)	cA2	1	1	1	0	1	1	1	1	1	1	1	nocov	1	1	1	1	1	0	nocov	0	0	0	0	0	0	0	nocov	nocov	0	0	1	0	0	nocov	nocov	0	0	0	0	nocov	1	1	0	1	0	0
O. sativa	IRIS_313-10847	XI-adm	XI-2A	1	1	1	0	1	1	1	1	1	1	1	0	1	1	1	1	1	1	1	1	1	1	1	1	1	1	1	1	1	1	1	1	1	1	1	0	1	0	1	1	1	1	1	0	1	1
O. sativa	IRIS_313-10848	GJ-sbtrp	GJ-subtrp	0	1	0	1	0	nocov	0	nocov	0	0	0	0	1	0	0	1	0	0	nocov	0	0	0	0	0	0	0	nocov	1	1	nocov	0	0	0	nocov	0	1	0	0	1	nocov	0	0	0	0	1	0
O. sativa	IRIS_313-10849	cA(Aus)	cA1	1	1	1	0	1	1	1	1	1	0	1	nocov	1	1	1	1	1	0	1	1	1	1	0	0	0	0	nocov	1	1	0	0	0	0	nocov	nocov	0	0	0	1	nocov	1	0	1	1	0	0
O. sativa	IRIS_313-10850	admix	admix	1	1	1	1	1	1	1	1	1	1	1	1	1	1	1	1	1	0	1	1	1	1	1	1	1	1	1	1	1	1	1	1	0	nocov	0	1	0	1	1	nocov	1	1	1	0	1	1
O. sativa	IRIS_313-10851	cB(Bas)	cB	0	0	0	1	1	1	0	0	0	1	1	0	nocov	1	1	1	0	1	1	1	0	0	0	1	1	0	nocov	1	1	1	0	1	0	nocov	1	1	0	0	1	1	1	0	1	0	0	0
O. sativa	IRIS_313-10852	cA(Aus)	cA1	1	1	1	0	1	1	1	1	1	0	0	1	1	1	1	1	1	0	1	1	1	1	0	0	0	0	nocov	1	1	0	0	0	0	0	nocov	0	nocov	1	1	nocov	1	1	1	1	0	1
O. sativa	IRIS_313-10853	GJ-adm	GJ-adm	0	1	0	1	0	nocov	nocov	0	0	nocov	0	0	1	0	0	0	0	0	nocov	0	0	0	0	0	0	0	nocov	1	1	nocov	0	0	0	nocov	0	0	0	1	1	0	0	0	0	0	0	0
O. sativa	IRIS_313-10854	cA(Aus)	cA1	1	1	1	0	1	nocov	1	1	1	0	0	nocov	1	0	1	1	1	0	1	1	1	1	0	1	0	0	nocov	1	1	0	0	0	0	1	nocov	0	0	0	1	nocov	1	1	1	1	0	0
O. sativa	IRIS_313-10855	XI-2	XI-2A	1	1	1	0	1	1	1	1	1	1	1	1	1	1	1	1	1	1	1	1	1	1	1	1	1	1	1	1	1	1	1	0	1	nocov	1	0	0	1	1	1	1	nocov	0	1	1	1
O. sativa	IRIS_313-10856	admix	admix	1	1	1	0	1	1	1	1	1	nocov	1	nocov	1	1	1	1	1	1	1	1	1	1	1	1	0	0	nocov	1	1	1	1	1	1	1	1	0	0	0	1	1	1	1	1	1	1	1
O. sativa	IRIS_313-10857	admix	XI-adm	1	1	1	0	1	nocov	1	nocov	1	1	0	1	1	1	1	1	1	0	nocov	1	1	0	0	0	0	0	1	1	1	1	0	1	1	nocov	0	0	0	0	1	nocov	1	1	0	1	1	1
O. sativa	IRIS_313-10858	XI-adm	XI-adm	1	1	1	0	1	1	1	1	1	1	1	1	1	1	1	1	0	1	1	1	1	1	1	1	1	1	1	1	1	1	0	1	1	nocov	1	0	1	1	1	1	1	1	0	1	1	0
O. sativa	IRIS_313-10859	XI-adm	XI-adm	1	1	1	0	1	1	1	1	1	1	1	1	1	1	1	1	1	1	1	1	1	1	0	0	0	0	nocov	1	1	0	0	1	1	nocov	nocov	0	0	1	1	nocov	1	1	1	1	1	1
O. sativa	IRIS_313-10861	cA(Aus)	cA1	1	1	1	0	1	1	1	1	1	0	0	nocov	1	0	1	1	1	0	1	1	1	1	0	1	0	0	nocov	1	1	0	0	0	0	1	0	0	0	0	1	nocov	1	1	1	1	0	0
O. sativa	IRIS_313-10862	GJ-adm	GJ-adm	0	1	nocov	1	0	nocov	nocov	0	0	0	nocov	0	1	0	0	0	0	0	nocov	0	0	0	0	0	0	0	nocov	1	0	nocov	0	0	0	nocov	0	0	0	0	1	nocov	nocov	0	0	0	0	0
O. sativa	IRIS_313-10863	XI-2	XI-2	1	1	1	0	1	1	1	1	1	1	1	1	1	1	1	1	1	1	1	1	1	1	1	1	1	1	1	1	1	1	1	1	1	1	0	0	0	1	0	nocov	1	1	1	1	1	1
O. sativa	IRIS_313-10864	admix	admix	nocov	0	0	1	0	nocov	0	0	0	0	0	0	1	1	0	0	0	0	nocov	0	0	0	0	0	0	0	nocov	1	0	0	0	0	0	nocov	0	0	0	0	1	nocov	nocov	1	0	0	0	0
O. sativa	IRIS_313-10865	GJ-sbtrp	GJ-subtrp	0	1	0	1	0	nocov	0	0	0	0	0	0	1	0	0	0	0	0	nocov	0	0	0	0	0	0	0	nocov	nocov	0	nocov	0	0	0	nocov	0	1	0	0	0	nocov	nocov	0	0	0	1	0
O. sativa	IRIS_313-10866	GJ-sbtrp	GJ-subtrp	0	0	0	1	0	nocov	0	0	0	0	0	0	1	0	0	0	0	0	nocov	0	0	0	0	0	0	0	nocov	nocov	0	nocov	0	0	0	nocov	0	1	0	0	0	nocov	nocov	nocov	0	0	0	0
O. sativa	IRIS_313-10867	GJ-sbtrp	GJ-subtrp	nocov	0	0	1	0	nocov	0	0	0	1	nocov	0	1	0	0	0	0	0	nocov	0	0	0	nocov	0	0	0	nocov	1	0	nocov	0	0	0	nocov	0	1	0	0	0	nocov	0	0	0	0	0	0
O. sativa	IRIS_313-10868	cB(Bas)	cB	1	0	1	1	0	nocov	nocov	0	0	0	nocov	0	1	1	1	0	0	0	nocov	0	0	0	nocov	0	0	0	nocov	1	0	0	0	0	0	nocov	0	0	0	0	1	nocov	1	0	0	0	0	0
O. sativa	IRIS_313-10869	cA(Aus)	cA1	1	1	1	0	1	1	1	1	1	nocov	0	nocov	1	1	1	1	1	0	1	1	0	1	nocov	1	0	0	nocov	nocov	1	1	0	0	0	1	nocov	0	0	nocov	0	nocov	1	1	1	1	1	0
O. sativa	IRIS_313-10870	GJ-sbtrp	GJ-subtrp	1	1	0	1	0	nocov	0	0	0	0	0	0	1	0	0	0	0	0	nocov	0	0	0	0	0	0	0	nocov	1	1	nocov	0	0	0	nocov	0	1	0	0	0	nocov	0	0	0	0	1	0
O. sativa	IRIS_313-10871	cA(Aus)	cA1	1	1	1	0	1	1	1	1	1	0	0	nocov	1	0	1	1	1	0	1	1	1	1	0	0	0	0	nocov	1	1	0	0	0	0	1	nocov	0	1	0	1	nocov	1	1	1	1	0	1
O. sativa	IRIS_313-10872	GJ-adm	GJ-adm	1	1	0	1	1	nocov	0	1	0	0	0	0	1	0	0	0	0	0	nocov	0	1	1	0	1	1	0	nocov	1	0	1	1	0	0	nocov	0	1	1	0	1	nocov	1	0	0	0	1	0
O. sativa	IRIS_313-10873	cA(Aus)	cA-adm	0	1	1	0	1	nocov	1	1	1	nocov	0	nocov	1	0	1	1	1	0	nocov	1	1	0	0	0	0	0	nocov	1	1	0	0	0	0	nocov	0	0	0	nocov	0	nocov	1	1	0	1	0	0
O. sativa	IRIS_313-10874	GJ-sbtrp	GJ-subtrp	nocov	0	nocov	1	0	nocov	0	0	0	1	0	0	1	nocov	0	0	0	0	nocov	0	0	0	0	0	0	0	nocov	nocov	0	nocov	0	0	0	nocov	0	1	0	0	0	nocov	0	0	0	0	0	0
O. sativa	IRIS_313-10875	cA(Aus)	cA1	1	1	1	0	1	1	1	1	1	0	0	1	1	1	1	1	1	0	1	1	0	1	0	0	0	0	nocov	nocov	1	0	nocov	0	0	1	nocov	0	nocov	0	0	nocov	1	1	0	1	0	0
O. sativa	IRIS_313-10876	cA(Aus)	cA1	1	1	1	0	1	1	1	1	1	nocov	0	nocov	1	0	1	1	1	1	1	1	0	1	nocov	0	0	0	nocov	nocov	1	1	0	0	0	1	nocov	0	0	0	0	nocov	1	1	1	1	0	0
O. sativa	IRIS_313-10877	cA(Aus)	cA1	1	1	1	0	1	1	1	1	1	nocov	0	nocov	1	nocov	1	1	1	0	1	1	0	1	nocov	1	0	0	nocov	nocov	1	1	0	0	0	1	nocov	0	0	0	0	nocov	1	1	1	1	0	0
O. sativa	IRIS_313-10878	cA(Aus)	cA1	1	1	1	0	1	1	1	1	1	0	0	nocov	1	1	1	1	1	0	1	1	0	1	0	1	0	0	nocov	nocov	1	1	0	0	0	1	nocov	0	0	0	0	nocov	1	1	1	1	0	0
O. sativa	IRIS_313-10879	admix	admix	1	1	1	0	1	1	1	1	1	0	1	0	1	0	1	1	1	0	1	1	1	1	1	1	1	0	nocov	1	1	0	0	0	0	1	1	0	nocov	1	1	1	1	0	1	1	0	1
O. sativa	IRIS_313-10880	XI-2	XI-2A	1	1	1	0	1	1	1	1	1	1	1	1	1	1	1	1	1	1	1	1	1	1	1	1	1	1	1	1	1	1	1	1	1	1	0	0	0	0	1	1	1	0	1	1	1	1
O. sativa	IRIS_313-10881	admix	admix	1	1	0	0	1	1	1	1	1	0	0	1	1	0	0	0	0	0	1	0	1	1	0	0	0	0	nocov	1	1	nocov	1	0	0	1	0	0	0	0	1	nocov	1	0	0	0	0	0
O. sativa	IRIS_313-10882	cA(Aus)	cA1	nocov	1	1	0	1	1	1	1	1	0	1	nocov	1	1	1	1	1	0	1	1	1	1	0	1	0	0	nocov	1	1	0	0	0	0	1	0	0	nocov	0	1	nocov	1	1	1	1	0	0
O. sativa	IRIS_313-10883	admix	admix	1	0	0	1	0	nocov	0	nocov	1	0	0	1	1	nocov	0	1	1	0	nocov	1	0	1	0	1	0	0	nocov	1	0	nocov	0	0	0	nocov	0	1	0	0	1	nocov	0	0	0	0	0	0
O. sativa	IRIS_313-10884	GJ-sbtrp	GJ-subtrp	1	1	0	1	0	nocov	0	0	0	nocov	0	0	1	0	0	0	0	0	nocov	0	0	0	0	0	0	0	nocov	1	0	nocov	0	0	0	nocov	0	1	0	0	1	nocov	nocov	0	0	0	1	0
O. sativa	IRIS_313-10885	XI-adm	XI-2A	1	1	1	0	1	1	1	1	1	1	1	1	1	0	1	1	0	1	1	1	1	1	1	1	1	1	nocov	1	1	1	0	1	1	nocov	1	0	1	nocov	1	nocov	1	1	0	1	0	1
O. sativa	IRIS_313-10886	GJ-sbtrp	GJ-subtrp	1	0	0	1	0	nocov	0	0	0	0	nocov	0	1	0	0	0	0	0	nocov	0	0	0	0	0	0	0	nocov	1	1	nocov	0	0	0	nocov	0	1	0	0	1	nocov	0	0	0	0	1	0
O. sativa	IRIS_313-10887	XI-adm	XI-3B	1	1	1	0	1	1	1	1	1	1	1	1	1	1	1	1	1	1	1	1	1	1	1	1	1	1	1	1	1	1	1	1	1	nocov	1	0	1	1	1	1	nocov	1	1	0	1	1
O. sativa	IRIS_313-10888	GJ-sbtrp	GJ-subtrp	0	1	0	1	0	nocov	0	0	0	0	0	0	1	0	0	0	0	0	nocov	0	0	0	0	0	0	0	nocov	1	0	nocov	0	1	0	nocov	0	1	0	0	1	nocov	0	nocov	0	0	0	0
O. sativa	IRIS_313-10889	GJ-sbtrp	GJ-subtrp	1	nocov	0	1	0	nocov	0	0	0	0	nocov	0	1	nocov	0	0	0	0	nocov	0	0	0	0	0	0	0	nocov	nocov	1	nocov	0	0	0	nocov	0	1	0	0	0	nocov	0	0	0	0	1	0
O. sativa	IRIS_313-10890	GJ-sbtrp	GJ-subtrp	0	1	0	1	0	nocov	0	0	0	0	0	0	1	0	0	0	0	0	nocov	0	0	0	0	0	0	0	nocov	1	0	nocov	0	0	0	nocov	0	1	0	0	1	nocov	0	0	0	0	0	0
O. sativa	IRIS_313-10891	cA(Aus)	cA1	1	0	1	0	1	1	1	1	1	0	1	nocov	1	1	1	1	1	0	1	1	1	1	0	1	0	0	nocov	1	1	1	0	0	0	1	nocov	0	nocov	0	1	nocov	1	1	1	1	0	0
O. sativa	IRIS_313-10892	cA(Aus)	cA1	1	1	1	0	1	1	1	1	0	0	0	1	1	0	1	1	1	0	1	1	1	1	0	1	0	0	nocov	1	1	0	0	0	0	1	nocov	0	nocov	0	1	nocov	1	1	1	1	0	1
O. sativa	IRIS_313-10893	GJ-sbtrp	GJ-subtrp	0	nocov	0	1	0	nocov	0	0	0	1	nocov	0	1	0	0	1	0	0	nocov	0	0	0	0	0	0	0	nocov	1	1	nocov	0	0	0	nocov	0	1	0	0	0	nocov	0	0	0	0	0	0
O. sativa	IRIS_313-10894	admix	cA1	1	0	1	0	1	1	1	1	0	0	1	1	1	1	1	1	1	0	1	1	1	1	0	1	0	0	nocov	1	1	1	0	0	0	1	1	0	0	0	1	nocov	1	0	1	1	0	0
O. sativa	IRIS_313-10895	GJ-sbtrp	GJ-subtrp	0	1	0	1	0	nocov	0	nocov	0	0	0	0	1	0	0	0	0	0	nocov	0	0	0	0	0	0	0	nocov	1	1	nocov	0	0	0	nocov	0	0	0	1	1	0	0	0	0	0	0	0
O. sativa	IRIS_313-10896	admix	admix	1	0	1	0	1	nocov	1	1	0	nocov	1	1	1	0	1	1	1	0	1	1	1	1	0	1	0	0	nocov	1	1	1	0	1	0	1	1	0	0	1	1	nocov	1	0	1	1	0	0
O. sativa	IRIS_313-10897	XI-3	XI-3B1	1	1	1	0	1	1	1	1	1	1	1	1	1	nocov	1	1	0	1	1	1	1	1	1	1	1	1	nocov	1	1	1	1	1	1	nocov	nocov	0	1	0	1	nocov	1	nocov	1	0	1	1
O. sativa	IRIS_313-10898	XI-3	XI-3B1	1	1	1	0	1	1	1	1	1	1	1	1	1	1	1	1	0	1	1	1	1	1	1	1	1	1	nocov	1	1	1	1	0	0	1	1	0	1	0	1	nocov	1	1	1	0	1	1
O. sativa	IRIS_313-10899	XI-3	XI-3B1	1	1	1	0	1	0	1	1	1	1	1	1	1	1	1	1	0	1	1	1	1	1	1	1	1	1	1	1	1	1	1	0	1	1	nocov	0	1	0	1	nocov	1	nocov	0	1	1	1
O. sativa	IRIS_313-10900	XI-3	XI-3B1	1	1	1	0	1	0	1	1	1	1	1	1	1	1	1	1	0	1	1	1	1	1	1	1	1	1	1	1	1	1	1	0	1	1	0	0	1	0	1	nocov	1	nocov	0	1	1	1
O. sativa	IRIS_313-10901	XI-3	XI-3B1	1	nocov	1	0	1	1	1	1	1	1	1	1	1	1	1	1	0	1	1	1	1	1	1	1	1	1	nocov	1	1	1	1	0	1	1	0	0	1	nocov	1	1	1	nocov	1	1	1	1
O. sativa	IRIS_313-10902	XI-3	XI-3B1	1	1	1	0	1	1	1	1	1	1	1	1	1	1	1	1	0	1	1	1	1	1	1	1	1	1	1	1	1	1	1	1	1	1	1	0	1	0	1	1	1	0	1	0	1	1
O. sativa	IRIS_313-10903	XI-3	XI-3B1	1	1	1	0	1	1	1	1	1	1	1	1	1	1	1	1	0	1	1	1	1	1	1	1	1	1	1	1	1	1	1	1	0	1	1	0	1	0	1	1	1	0	1	1	1	1
O. sativa	IRIS_313-10904	XI-3	XI-3B1	1	1	1	0	1	1	1	1	1	1	1	1	1	1	1	1	0	1	1	1	1	1	1	1	1	1	1	1	1	1	1	1	0	1	0	0	1	0	1	nocov	1	nocov	1	1	1	1
O. sativa	IRIS_313-10905	XI-3	XI-3B1	1	1	1	0	1	1	1	1	1	1	1	1	1	1	1	1	0	1	1	1	1	1	1	1	1	1	1	1	1	1	1	nocov	1	1	1	0	1	0	1	nocov	1	0	1	1	1	1
O. sativa	IRIS_313-10906	XI-3	XI-3B1	1	0	1	0	1	1	1	1	1	1	1	1	1	1	1	1	0	1	1	1	1	1	1	1	1	1	1	1	1	1	1	0	1	1	nocov	0	1	0	1	1	1	nocov	1	1	1	1
O. sativa	IRIS_313-10907	XI-3	XI-3B1	1	0	1	0	1	1	1	1	1	1	1	1	1	nocov	1	1	0	1	1	1	1	1	nocov	1	1	1	1	1	1	1	1	1	1	1	nocov	0	1	0	1	1	1	nocov	1	1	1	1
O. sativa	IRIS_313-10908	XI-3	XI-3B1	1	1	1	0	1	0	1	1	1	1	1	1	1	1	1	1	0	1	1	1	1	1	1	1	1	1	1	1	1	1	1	nocov	1	1	1	0	1	0	1	nocov	1	nocov	1	1	1	1
O. sativa	IRIS_313-10909	XI-3	XI-3B1	1	1	1	0	1	0	1	1	1	1	1	1	1	1	1	1	0	1	1	1	1	1	1	1	1	1	nocov	1	1	1	1	0	1	1	1	0	1	0	1	nocov	1	nocov	1	1	1	1
O. sativa	IRIS_313-10910	XI-3	XI-3B1	1	0	1	0	1	1	1	1	1	1	1	1	1	1	1	1	0	1	1	1	1	1	1	1	1	1	1	1	1	1	1	1	1	1	1	0	1	1	1	nocov	1	1	1	1	1	1
O. sativa	IRIS_313-10911	XI-3	XI-3B1	1	1	1	0	1	1	1	1	0	1	1	1	1	1	1	1	0	1	1	1	1	1	1	1	1	1	1	1	1	1	1	1	1	1	1	0	1	1	1	nocov	1	0	1	1	1	1
O. sativa	IRIS_313-10912	XI-3	XI-3B1	1	1	1	0	1	0	1	1	1	1	1	1	1	1	1	1	0	1	1	1	1	1	1	1	1	1	1	1	1	1	1	0	1	1	nocov	0	1	0	1	nocov	1	0	1	0	1	1
O. sativa	IRIS_313-10913	XI-3	XI-3B1	1	1	1	0	1	1	1	1	1	1	1	1	1	1	1	1	0	1	1	1	1	1	1	1	1	1	1	1	1	1	1	0	1	1	1	0	1	0	1	nocov	1	1	1	1	1	1
O. sativa	IRIS_313-10915	XI-3	XI-3B1	1	1	1	0	1	1	1	1	1	1	1	1	1	1	1	1	0	1	1	1	1	1	1	1	1	1	1	1	1	1	1	0	1	nocov	1	0	1	0	1	1	1	0	1	0	1	1
O. sativa	IRIS_313-10916	GJ-tmp	GJ-temp	0	0	0	1	0	nocov	0	0	0	0	0	0	1	0	0	0	0	0	nocov	0	0	0	0	0	0	0	nocov	nocov	0	nocov	0	0	0	nocov	0	0	0	0	0	nocov	0	0	1	0	0	0
O. sativa	IRIS_313-10917	XI-adm	XI-adm	1	1	1	0	1	1	1	1	1	1	1	0	1	1	1	1	0	1	1	1	1	1	1	1	1	1	1	1	1	1	1	1	0	nocov	0	0	0	1	1	nocov	1	1	0	1	0	1
O. sativa	IRIS_313-10918	GJ-trp	GJ-trop1	0	0	0	1	0	nocov	0	0	1	1	0	0	1	0	1	0	0	0	nocov	0	0	0	0	0	0	1	0	nocov	1	1	0	0	0	nocov	0	1	0	0	0	0	1	0	1	0	0	0
O. sativa	IRIS_313-10919	GJ-trp	GJ-trop2	nocov	0	0	1	0	nocov	0	0	0	1	0	0	nocov	0	0	0	0	0	nocov	0	0	0	0	0	0	1	nocov	1	1	nocov	0	0	0	nocov	0	1	0	0	0	1	0	nocov	1	0	0	0
O. sativa	IRIS_313-10920	GJ-trp	GJ-trop2	nocov	nocov	1	1	0	nocov	0	0	0	1	nocov	0	nocov	nocov	0	0	0	0	nocov	0	0	0	0	0	0	1	nocov	1	0	nocov	0	0	0	nocov	0	1	0	nocov	0	1	nocov	0	1	nocov	0	0
O. sativa	IRIS_313-10921	XI-adm	XI-3B	1	1	1	0	1	1	1	nocov	1	1	1	0	1	1	1	1	1	1	1	1	1	1	1	1	1	1	1	1	1	1	1	1	1	1	1	0	1	1	1	nocov	1	nocov	1	1	1	1
O. sativa	IRIS_313-10922	GJ-sbtrp	GJ-subtrp	1	1	0	1	0	nocov	0	nocov	0	0	0	0	1	0	0	0	0	0	nocov	0	0	0	0	0	0	0	nocov	1	0	nocov	0	0	0	nocov	0	1	0	0	1	0	0	0	0	0	1	0
O. sativa	IRIS_313-10923	GJ-sbtrp	GJ-subtrp	0	1	0	1	0	nocov	0	0	0	0	0	0	1	0	0	0	0	0	nocov	0	0	0	0	0	0	0	nocov	1	0	nocov	0	0	0	nocov	0	1	0	0	1	nocov	0	0	0	0	0	0
O. sativa	IRIS_313-10924	XI-adm	XI-adm	1	1	1	0	1	1	1	1	1	1	1	1	1	1	1	1	1	1	1	1	1	1	0	1	1	1	nocov	1	1	1	1	1	0	1	1	0	1	1	1	1	1	1	0	1	1	1
O. sativa	IRIS_313-10925	cA(Aus)	cA1	1	1	1	0	1	1	1	1	1	0	0	1	1	1	1	1	1	0	1	1	1	0	0	0	0	0	nocov	1	1	0	0	0	0	1	0	0	0	1	1	0	1	1	1	1	0	0
O. sativa	IRIS_313-10926	cB(Bas)	cB	0	0	0	1	0	nocov	0	0	1	0	nocov	1	nocov	1	1	0	0	0	nocov	0	0	0	nocov	0	0	0	nocov	0	0	0	0	0	0	nocov	0	0	0	0	0	nocov	1	1	0	0	0	0
O. sativa	IRIS_313-10927	cA(Aus)	cA2	1	1	1	0	1	1	1	1	1	1	1	1	1	1	1	1	1	0	nocov	0	1	1	0	0	0	0	nocov	1	0	0	1	0	0	nocov	0	0	0	0	0	nocov	1	1	1	1	0	0
O. sativa	IRIS_313-10928	XI-3	XI-3B1	1	1	1	0	1	1	1	1	1	1	1	1	1	1	1	1	1	1	1	1	1	1	1	1	1	1	1	1	1	1	1	1	1	1	1	0	0	1	1	1	1	nocov	1	1	1	1
O. sativa	IRIS_313-10929	XI-2	XI-2A	1	0	1	0	1	1	1	1	1	1	1	1	1	1	1	1	1	1	1	1	1	1	1	1	1	1	1	1	1	1	1	1	1	1	1	0	1	0	1	1	1	1	1	1	1	1
O. sativa	IRIS_313-10930	cA(Aus)	cA1	1	1	1	0	1	1	1	1	1	nocov	1	1	1	1	1	1	1	0	1	1	1	0	0	1	0	0	nocov	1	1	0	0	1	0	nocov	0	0	0	0	1	nocov	1	1	1	1	0	0
O. sativa	IRIS_313-10931	GJ-trp	GJ-trop1	0	0	0	1	0	nocov	0	0	0	0	0	0	1	nocov	0	0	0	0	nocov	0	0	0	0	0	0	0	nocov	nocov	0	nocov	0	0	0	nocov	0	1	0	0	0	nocov	0	0	0	0	0	0
O. sativa	IRIS_313-10932	XI-1A	XI-1A	1	1	1	0	1	1	1	1	1	1	1	1	1	1	1	1	1	1	1	1	1	1	1	1	1	1	1	1	1	1	1	1	1	1	1	0	0	1	1	1	1	1	1	1	0	1
O. sativa	IRIS_313-10933	cB(Bas)	cB	1	0	0	1	0	nocov	0	0	0	0	0	0	nocov	1	1	0	0	1	nocov	0	0	0	0	0	0	0	nocov	1	0	0	0	0	0	nocov	0	1	0	0	0	nocov	nocov	1	0	0	0	0
O. sativa	IRIS_313-10934	XI-3	XI-3B1	1	1	1	0	1	1	1	1	1	1	1	1	1	1	1	1	0	1	1	nocov	1	1	1	1	1	1	1	1	1	1	1	1	1	1	1	0	1	0	1	1	1	0	1	1	1	1
O. sativa	IRIS_313-10935	XI-3	XI-3A	1	0	1	0	1	1	1	1	1	1	1	1	1	1	0	1	0	1	1	1	1	1	1	1	1	1	1	1	1	1	1	1	1	1	0	0	1	0	1	nocov	1	1	1	1	1	1
O. sativa	IRIS_313-10936	GJ-trp	GJ-trop2	0	0	1	1	0	nocov	0	0	0	0	0	0	nocov	0	0	0	0	0	nocov	0	0	0	0	0	0	0	1	1	1	nocov	0	0	0	nocov	0	1	0	0	1	1	0	0	0	0	0	0
O. sativa	IRIS_313-10937	XI-3	XI-3A	1	1	1	0	1	1	0	1	1	1	1	1	1	1	1	1	0	1	1	1	1	1	1	0	1	1	1	1	1	1	1	0	1	1	nocov	0	1	0	1	nocov	1	nocov	1	1	1	1
O. sativa	IRIS_313-10938	XI-3	XI-3A	1	0	1	0	1	nocov	1	1	1	1	1	1	1	1	1	1	0	1	1	1	1	1	1	1	1	1	1	1	1	1	1	1	1	1	1	0	1	0	1	nocov	1	1	1	1	1	1
O. sativa	IRIS_313-10940	XI-3	XI-3A	1	0	1	0	1	1	1	1	1	1	1	1	1	1	0	1	0	1	1	1	1	1	1	1	1	1	1	1	1	1	1	0	1	1	1	0	1	0	1	nocov	1	1	1	1	1	1
O. sativa	IRIS_313-10941	XI-adm	XI-adm	1	1	1	0	1	1	1	1	1	1	1	1	1	1	1	1	0	0	1	1	1	1	1	1	1	1	1	1	1	1	1	1	1	1	1	0	1	0	1	1	1	1	1	1	1	1
O. sativa	IRIS_313-10942	XI-3	XI-3A	1	1	1	0	1	1	1	1	1	1	1	1	1	1	1	1	0	1	1	1	1	1	1	1	1	1	1	1	1	1	1	0	1	1	1	0	1	0	1	nocov	1	1	1	1	1	1
O. sativa	IRIS_313-10943	XI-3	XI-3A	1	nocov	1	0	1	1	1	1	1	1	1	1	1	1	1	1	0	1	1	1	1	1	1	1	1	1	1	1	1	1	1	1	1	1	0	0	1	0	1	nocov	1	0	1	1	1	1
O. sativa	IRIS_313-10944	XI-3	XI-3	1	0	1	0	1	nocov	1	1	1	1	1	1	1	0	1	1	0	1	1	1	1	1	1	1	1	1	1	1	1	1	1	0	1	nocov	nocov	0	1	1	1	nocov	1	1	1	0	1	1
O. sativa	IRIS_313-10945	GJ-trp	GJ-trop1	0	0	nocov	1	0	nocov	0	0	0	1	0	0	1	nocov	0	0	0	0	nocov	0	0	0	0	0	0	1	nocov	1	0	nocov	0	0	0	nocov	0	1	0	0	1	0	nocov	0	0	0	0	0
O. sativa	IRIS_313-10946	GJ-trp	GJ-trop1	0	0	0	1	0	nocov	0	0	0	0	0	0	1	0	0	0	0	0	nocov	0	0	0	0	0	0	1	nocov	1	1	nocov	nocov	0	0	nocov	0	1	0	0	0	nocov	nocov	0	0	0	0	0
O. sativa	IRIS_313-10947	XI-3	XI-3B	1	1	1	0	1	1	1	1	1	1	1	1	1	1	1	0	0	1	1	1	1	1	1	1	1	1	1	1	1	1	1	1	0	1	1	0	1	1	1	1	1	nocov	1	1	1	1
O. sativa	IRIS_313-10948	admix	admix	1	1	1	1	1	1	1	1	1	1	1	1	1	1	1	1	0	1	1	1	1	1	1	1	1	1	1	1	1	1	1	1	1	1	1	1	1	0	1	nocov	1	1	1	1	1	1
O. sativa	IRIS_313-10949	GJ-trp	GJ-trop1	0	0	0	1	0	nocov	0	0	0	1	0	0	1	0	0	0	0	0	nocov	0	0	0	0	0	0	1	nocov	1	0	nocov	0	0	0	nocov	0	1	0	0	1	0	1	0	0	0	0	0
O. sativa	IRIS_313-10950	GJ-trp	GJ-trop2	0	0	0	1	0	nocov	0	1	0	1	0	nocov	nocov	1	0	0	0	1	nocov	0	0	0	nocov	0	0	0	nocov	1	0	nocov	0	0	0	nocov	0	1	0	0	1	1	0	0	0	1	0	0
O. sativa	IRIS_313-10951	XI-3	XI-3A	1	1	1	0	1	1	1	1	1	1	1	1	1	1	1	1	0	1	1	1	1	1	1	1	1	1	1	1	1	1	1	1	1	1	1	0	1	0	1	nocov	1	0	1	1	1	1
O. sativa	IRIS_313-10952	GJ-trp	GJ-trop1	0	nocov	0	1	0	nocov	nocov	0	0	1	0	0	1	0	0	0	0	0	nocov	0	0	0	0	0	0	0	nocov	1	0	nocov	0	0	0	nocov	0	1	0	1	0	0	1	0	0	0	0	0
O. sativa	IRIS_313-10953	GJ-trp	GJ-trop1	0	0	1	1	0	nocov	0	0	0	1	0	0	1	nocov	0	0	0	nocov	nocov	0	0	0	0	0	0	1	nocov	1	0	1	0	0	0	nocov	0	1	0	1	0	0	1	0	1	0	0	0
O. sativa	IRIS_313-10954	XI-3	XI-3A	1	0	1	0	1	1	1	1	1	1	1	1	1	1	1	1	0	1	1	1	1	1	1	1	1	1	1	1	1	1	1	1	0	1	1	0	1	0	1	1	1	0	1	1	1	1
O. sativa	IRIS_313-10955	XI-3	XI-3A	1	1	1	0	1	1	1	1	1	1	1	1	1	1	1	1	0	1	1	1	1	1	1	1	1	1	1	1	1	1	1	0	1	1	nocov	0	1	0	1	1	1	1	1	1	1	1
O. sativa	IRIS_313-10956	GJ-trp	GJ-trop2	0	nocov	0	1	0	nocov	nocov	0	0	1	nocov	0	nocov	0	0	0	0	0	nocov	0	0	0	0	0	0	0	1	1	0	nocov	0	0	0	nocov	0	1	0	0	1	1	nocov	0	0	0	0	0
O. sativa	IRIS_313-10957	GJ-trp	GJ-trop1	0	0	0	1	0	nocov	nocov	0	0	1	0	0	1	0	0	0	0	0	nocov	0	0	0	0	0	0	1	nocov	1	1	nocov	0	0	0	nocov	0	1	0	1	0	nocov	0	0	0	0	0	0
O. sativa	IRIS_313-10958	GJ-trp	GJ-trop1	0	1	0	1	0	nocov	0	0	0	1	0	0	1	0	0	0	0	0	nocov	0	0	0	0	0	0	1	nocov	1	0	nocov	0	0	0	nocov	0	1	0	1	0	0	1	0	1	0	0	0
O. sativa	IRIS_313-10959	GJ-trp	GJ-trop1	0	1	0	1	0	nocov	0	0	0	1	0	0	1	0	0	0	0	0	nocov	0	0	0	0	0	0	1	1	1	0	nocov	0	0	0	nocov	0	1	0	1	0	0	0	0	1	nocov	0	0
O. sativa	IRIS_313-10960	GJ-trp	GJ-trop1	0	0	0	1	0	nocov	0	0	0	1	0	0	1	0	0	0	0	0	nocov	0	0	0	0	0	0	1	nocov	1	0	nocov	0	0	0	nocov	0	1	0	1	0	nocov	1	0	0	0	0	0
O. sativa	IRIS_313-10961	XI-3	XI-3A	1	1	1	0	1	1	1	1	1	1	1	1	1	1	0	1	0	1	1	1	1	1	1	1	1	1	1	1	1	1	1	0	1	1	1	0	1	0	1	nocov	1	1	1	1	1	1
O. sativa	IRIS_313-10962	XI-3	XI-3A	1	1	1	0	1	1	1	1	1	1	1	1	1	1	1	1	0	1	1	1	1	1	1	1	1	1	1	1	1	1	1	1	1	1	1	0	1	0	1	1	1	1	1	1	1	1
O. sativa	IRIS_313-10963	cA(Aus)	cA1	1	1	1	0	1	1	1	1	1	1	1	1	1	1	1	1	1	0	1	1	1	1	0	0	0	0	nocov	1	1	0	0	0	0	1	0	0	0	0	0	nocov	1	0	1	1	0	0
O. sativa	IRIS_313-10964	cA(Aus)	cA2	1	1	1	0	1	1	1	1	1	1	nocov	1	1	1	1	1	1	0	nocov	nocov	1	1	nocov	0	0	0	nocov	1	0	0	0	0	0	0	0	0	nocov	0	0	nocov	1	1	0	1	0	0
O. sativa	IRIS_313-10965	cA(Aus)	cA1	1	1	1	0	1	1	1	1	1	0	1	nocov	1	1	1	1	1	0	1	1	1	1	0	1	0	0	nocov	1	1	0	0	0	0	1	0	0	1	0	0	nocov	1	1	1	1	0	0
O. sativa	IRIS_313-10966	XI-adm	XI-3B2	1	0	1	0	1	1	1	1	1	1	1	1	1	1	1	1	1	1	1	1	1	1	1	1	1	1	1	1	1	1	1	0	1	1	1	0	0	1	1	nocov	1	1	1	1	1	1
O. sativa	IRIS_313-10967	GJ-tmp	GJ-temp	0	0	0	1	0	nocov	0	0	0	0	0	0	1	nocov	0	0	0	0	nocov	0	0	0	0	0	0	0	nocov	nocov	0	nocov	0	0	0	nocov	0	1	0	0	0	0	0	0	0	0	0	0
O. sativa	IRIS_313-10968	XI-1A	XI-1A	1	1	1	0	1	1	1	1	0	1	1	1	1	1	1	1	1	1	1	1	1	1	1	1	1	1	1	1	1	1	1	1	0	1	1	0	0	1	1	nocov	1	1	1	1	1	1
O. sativa	IRIS_313-10969	cA(Aus)	cA-adm	1	1	1	0	1	1	1	1	1	nocov	1	1	1	1	1	1	1	0	nocov	1	1	1	nocov	0	0	0	nocov	1	1	0	0	0	0	1	nocov	0	1	0	0	nocov	1	1	0	1	0	0
O. sativa	IRIS_313-10970	XI-3	XI-3B1	1	1	1	0	1	1	1	1	1	1	1	1	1	1	1	1	0	1	1	1	1	1	1	1	1	1	nocov	1	1	1	1	1	1	nocov	nocov	0	1	0	1	nocov	1	nocov	1	0	1	1
O. sativa	IRIS_313-10971	XI-2	XI-2A	1	1	1	0	1	1	1	1	1	1	1	1	1	1	1	1	1	1	1	0	1	1	1	1	1	1	1	1	1	1	1	1	1	0	1	0	0	1	1	nocov	1	nocov	1	0	1	1
O. sativa	IRIS_313-10972	XI-2	XI-2	1	1	1	0	1	1	1	1	1	1	1	1	1	1	1	1	0	1	1	1	1	1	1	1	1	1	1	1	1	1	1	1	1	1	1	1	0	1	1	1	1	nocov	1	1	1	1
O. sativa	IRIS_313-10973	XI-2	XI-2A	1	1	1	0	1	1	1	1	1	1	1	1	1	1	1	1	0	1	1	1	1	1	1	1	1	1	1	1	1	1	0	1	1	nocov	nocov	1	0	1	1	1	1	nocov	0	1	0	1
O. sativa	IRIS_313-10974	XI-2	XI-2A	1	0	1	0	1	1	1	1	1	1	1	1	1	1	1	1	0	1	1	1	1	1	1	1	1	0	1	1	1	1	1	1	0	nocov	1	0	0	1	1	1	1	nocov	1	1	1	1
O. sativa	IRIS_313-10975	XI-2	XI-2A	1	1	1	0	1	1	1	1	1	1	1	1	1	1	1	1	1	1	1	1	1	1	1	1	1	1	1	1	1	1	1	1	0	1	1	0	0	1	1	1	1	nocov	1	1	1	1
O. sativa	IRIS_313-10976	cA(Aus)	cA2	1	1	1	0	1	1	1	1	1	1	1	1	1	1	1	1	1	0	0	1	1	1	0	0	0	0	nocov	1	0	0	0	0	0	0	0	0	nocov	0	0	nocov	1	1	0	1	0	0
O. sativa	IRIS_313-10977	XI-2	XI-2A	1	1	1	0	1	1	1	1	1	1	1	1	1	1	1	1	0	1	1	1	1	1	1	1	1	1	1	1	1	1	0	1	1	1	0	0	0	1	1	nocov	1	nocov	0	1	0	1
O. sativa	IRIS_313-10978	XI-adm	XI-2	1	1	1	0	1	1	1	1	1	0	1	1	1	0	1	1	1	1	1	0	1	1	1	1	1	1	1	1	1	1	1	1	1	1	1	0	0	1	1	1	1	nocov	1	1	1	1
O. sativa	IRIS_313-10979	cA(Aus)	cA2	1	1	1	0	1	nocov	1	1	1	1	1	1	1	1	1	1	1	0	0	1	1	1	0	1	0	0	nocov	1	0	0	0	0	0	nocov	nocov	0	0	0	1	nocov	1	1	0	1	0	1
O. sativa	IRIS_313-10980	admix	admix	1	1	1	0	1	1	1	1	1	0	1	1	1	1	1	1	1	0	1	1	1	1	0	0	1	1	1	1	1	1	1	1	0	0	0	0	0	1	1	1	1	1	1	1	0	1
O. sativa	IRIS_313-10981	cA(Aus)	cA2	1	1	1	0	1	nocov	1	1	1	0	1	1	1	nocov	1	1	1	0	nocov	1	1	0	0	1	0	0	nocov	1	0	0	0	0	0	0	nocov	0	0	0	1	nocov	1	1	0	1	0	1
O. sativa	IRIS_313-10982	XI-2	XI-2A	1	0	1	0	1	1	1	1	1	1	1	1	1	1	1	1	0	1	1	1	1	1	1	1	1	1	1	1	1	1	1	1	1	nocov	1	0	0	1	1	nocov	1	nocov	1	1	1	1
O. sativa	IRIS_313-10983	XI-adm	XI-2A	1	1	1	0	1	1	1	1	1	1	1	1	1	1	1	1	0	1	1	1	1	1	1	1	1	1	1	1	1	1	0	0	1	1	nocov	0	1	1	1	nocov	1	nocov	1	1	1	1
O. sativa	IRIS_313-10984	XI-2	XI-2A	1	0	1	0	1	1	1	1	1	1	1	1	1	1	1	1	1	1	1	1	1	1	1	1	1	1	nocov	1	1	1	0	1	1	1	1	0	0	1	1	1	1	1	0	1	1	1
O. sativa	IRIS_313-10985	XI-2	XI-2A	1	1	1	0	1	1	1	1	1	nocov	1	1	1	1	1	1	1	1	1	1	1	1	1	1	1	1	1	1	1	1	1	1	1	1	1	0	1	1	0	nocov	0	0	0	1	0	1
O. sativa	IRIS_313-10986	XI-2	XI-2A	1	0	1	0	1	1	1	1	1	1	1	1	1	1	1	1	1	1	1	1	1	1	1	1	1	1	1	1	1	1	1	1	1	1	nocov	0	1	1	1	1	1	1	1	1	1	1
O. sativa	IRIS_313-10987	cA(Aus)	cA2	1	1	1	0	1	1	1	1	1	0	1	nocov	1	1	1	1	1	0	1	0	1	0	0	1	0	0	nocov	1	0	0	1	0	0	nocov	0	0	0	0	0	nocov	1	1	0	1	0	1
O. sativa	IRIS_313-10988	XI-adm	XI-adm	1	1	1	0	1	1	1	1	1	1	1	1	1	1	1	1	1	1	1	1	1	1	1	1	1	1	1	1	1	1	1	1	1	1	1	0	0	1	1	1	1	1	1	0	1	1
O. sativa	IRIS_313-10989	XI-2	XI-2A	1	1	1	0	1	1	1	1	1	1	1	1	1	1	1	1	1	1	1	1	1	1	1	1	1	1	nocov	1	1	1	1	1	0	1	nocov	0	0	0	1	1	1	1	1	0	1	1
O. sativa	IRIS_313-10990	XI-adm	XI-3B2	1	1	1	0	1	1	1	1	1	1	1	1	1	1	1	1	0	1	1	1	1	1	1	1	1	0	1	1	1	1	1	1	1	1	1	0	1	1	1	1	1	1	1	1	1	1
O. sativa	IRIS_313-10991	GJ-trp	GJ-trop1	0	0	0	1	0	nocov	nocov	0	0	1	0	0	1	0	0	0	0	0	nocov	0	0	0	0	0	0	1	nocov	1	0	nocov	0	0	0	nocov	0	1	0	0	0	nocov	1	nocov	0	0	0	0
O. sativa	IRIS_313-10992	GJ-trp	GJ-trop1	0	0	0	1	0	1	0	0	0	1	0	0	1	nocov	0	0	0	1	nocov	0	0	0	0	0	0	0	nocov	1	1	nocov	0	0	0	nocov	0	1	0	1	0	nocov	1	nocov	1	0	0	0
O. sativa	IRIS_313-10993	GJ-trp	GJ-trop1	0	0	0	1	0	nocov	0	0	0	0	0	0	1	0	0	0	0	0	nocov	0	0	0	0	0	0	0	nocov	nocov	0	nocov	0	0	0	nocov	0	1	0	0	0	nocov	0	0	0	nocov	0	0
O. sativa	IRIS_313-10994	GJ-trp	GJ-trop2	0	0	0	1	0	nocov	0	0	0	1	0	0	nocov	0	0	0	0	0	nocov	0	0	0	0	0	0	1	nocov	1	0	nocov	0	0	0	nocov	0	1	0	0	0	1	0	0	1	0	0	0
O. sativa	IRIS_313-10995	XI-3	XI-3B	1	0	1	0	1	1	1	1	1	1	1	1	1	1	1	1	0	1	1	1	1	1	1	0	1	1	1	1	1	1	1	1	0	1	1	0	1	1	1	1	1	1	1	1	1	1
O. sativa	IRIS_313-10996	XI-adm	XI-3A	1	1	1	1	1	1	1	1	1	1	1	1	1	1	1	1	0	1	1	1	1	1	1	1	1	1	1	1	1	1	1	1	1	1	1	0	1	0	1	1	1	1	1	0	1	1
O. sativa	IRIS_313-10997	XI-3	XI-3A	1	1	1	0	1	1	1	1	1	1	1	1	1	1	1	1	0	1	1	1	1	1	1	1	1	1	1	1	1	1	1	1	0	1	1	0	1	0	1	1	1	0	1	1	1	1
O. sativa	IRIS_313-10998	XI-adm	XI-3A	1	nocov	0	0	1	nocov	0	0	1	0	0	1	1	nocov	1	1	0	1	nocov	1	0	1	1	1	1	1	1	nocov	1	1	1	0	0	nocov	1	0	nocov	0	0	1	1	1	1	1	1	1
O. sativa	IRIS_313-10999	GJ-trp	GJ-trop1	0	0	0	1	0	1	0	0	0	1	0	0	1	nocov	0	0	0	0	nocov	0	0	0	0	0	0	1	nocov	1	0	nocov	0	0	0	nocov	0	1	0	1	1	nocov	1	0	1	0	0	0
O. sativa	IRIS_313-11000	XI-3	XI-3A	1	1	1	0	1	1	1	1	1	1	1	1	1	nocov	1	1	0	1	1	1	1	1	1	1	1	1	1	1	1	1	1	0	1	nocov	1	0	1	0	1	1	1	0	1	1	1	1
O. sativa	IRIS_313-11001	GJ-trp	GJ-trop1	0	0	0	1	0	nocov	0	0	0	1	0	0	1	0	0	0	0	0	nocov	0	0	0	nocov	0	0	0	nocov	nocov	0	nocov	0	0	0	nocov	0	1	0	0	0	nocov	0	0	0	0	0	0
O. sativa	IRIS_313-11003	GJ-trp	GJ-trop1	0	nocov	0	1	0	nocov	0	0	0	1	nocov	0	1	0	0	0	0	0	0	0	0	0	0	0	0	1	nocov	1	0	nocov	0	0	0	nocov	0	1	0	0	0	nocov	0	0	0	0	0	0
O. sativa	IRIS_313-11004	GJ-trp	GJ-trop1	0	0	0	1	0	nocov	0	0	0	1	0	0	1	0	0	1	0	0	nocov	0	0	0	nocov	0	0	1	0	nocov	0	nocov	0	0	0	nocov	0	1	0	nocov	0	nocov	0	0	0	0	0	0
O. sativa	IRIS_313-11005	GJ-trp	GJ-trop2	nocov	0	0	1	0	nocov	0	0	0	1	0	0	nocov	1	0	0	0	1	0	0	0	0	0	0	0	0	nocov	1	1	nocov	0	0	0	nocov	0	1	0	0	1	1	1	0	0	0	0	0
O. sativa	IRIS_313-11006	XI-3	XI-3	1	1	1	0	1	1	1	1	1	1	1	1	1	nocov	1	1	0	1	1	1	1	1	1	1	1	1	1	1	1	1	1	1	0	1	1	0	1	0	1	1	1	0	1	1	1	1
O. sativa	IRIS_313-11007	GJ-trp	GJ-trop2	nocov	0	0	1	1	nocov	0	0	0	1	nocov	0	nocov	0	0	0	0	0	nocov	0	0	0	0	0	0	0	1	1	0	nocov	0	0	0	nocov	0	1	0	0	1	1	0	0	0	0	0	0
O. sativa	IRIS_313-11008	GJ-trp	GJ-trop1	0	1	0	1	0	nocov	0	0	0	1	0	0	1	0	0	0	0	1	nocov	0	0	0	0	0	0	1	nocov	1	0	nocov	0	0	0	nocov	0	1	0	0	1	1	1	0	1	0	0	0
O. sativa	IRIS_313-11009	GJ-trp	GJ-trop1	0	1	1	1	0	nocov	0	0	0	1	0	0	1	0	0	0	0	0	nocov	0	0	0	nocov	0	0	1	0	1	1	nocov	0	0	0	nocov	0	1	0	0	0	nocov	1	0	1	0	0	0
O. sativa	IRIS_313-11010	XI-3	XI-3A	1	1	1	0	1	1	1	1	1	1	1	1	1	1	0	1	0	1	1	1	1	1	1	1	1	1	1	1	1	1	1	1	1	1	1	0	1	0	1	nocov	1	nocov	1	1	1	1
O. sativa	IRIS_313-11011	XI-adm	XI-3	1	1	1	0	1	1	1	1	1	1	1	1	1	1	0	1	1	1	1	1	1	1	nocov	1	1	1	1	1	1	nocov	1	1	0	1	1	0	1	nocov	1	1	1	0	1	1	1	1
O. sativa	IRIS_313-11012	admix	admix	1	1	1	1	0	1	nocov	1	0	1	1	1	1	nocov	1	1	0	1	1	1	1	0	1	0	0	1	nocov	1	1	nocov	1	1	0	1	1	1	1	0	1	1	1	1	1	1	1	0
O. sativa	IRIS_313-11013	cA(Aus)	cA1	1	1	1	0	1	1	1	1	1	1	1	1	1	1	1	1	1	0	1	1	1	1	0	1	0	0	nocov	1	1	0	0	0	0	nocov	nocov	0	nocov	0	1	nocov	1	0	0	1	0	0
O. sativa	IRIS_313-11014	cA(Aus)	cA2	1	1	1	0	1	1	1	1	1	0	1	nocov	1	1	1	1	1	0	1	1	0	0	0	0	0	0	nocov	1	1	1	0	0	0	1	0	0	0	0	0	nocov	1	1	0	1	0	0
O. sativa	IRIS_313-11015	cA(Aus)	cA2	1	1	1	0	1	1	1	1	1	0	1	nocov	1	1	1	1	1	0	nocov	1	1	0	0	0	0	0	nocov	1	1	1	0	0	0	nocov	0	0	0	0	0	nocov	1	1	0	1	0	1
O. sativa	IRIS_313-11016	cA(Aus)	cA1	1	1	1	0	1	1	1	1	1	0	1	nocov	1	1	1	1	1	0	1	1	1	1	0	0	0	0	nocov	1	1	0	0	0	0	1	nocov	0	1	0	1	nocov	1	1	1	1	0	0
O. sativa	IRIS_313-11017	cA(Aus)	cA1	1	1	1	0	1	1	1	1	1	nocov	1	1	1	1	1	1	1	0	1	1	1	1	0	1	0	0	nocov	1	1	0	0	0	0	nocov	nocov	0	0	0	1	nocov	1	nocov	0	1	0	0
O. sativa	IRIS_313-11018	cA(Aus)	cA-adm	1	1	1	0	1	1	1	1	1	1	1	1	1	1	1	1	1	0	nocov	1	1	1	nocov	0	0	0	nocov	1	1	0	0	0	0	1	nocov	0	0	0	1	nocov	1	1	1	1	0	0
O. sativa	IRIS_313-11019	cA(Aus)	cA2	1	1	1	0	1	1	1	1	1	0	1	1	1	1	1	1	1	0	nocov	nocov	1	1	0	0	0	0	nocov	1	1	1	0	0	1	1	0	0	0	0	0	nocov	1	1	0	1	0	0
O. sativa	IRIS_313-11020	cA(Aus)	cA-adm	1	1	1	0	1	1	1	1	1	0	0	1	1	0	1	1	1	0	nocov	1	1	0	0	1	0	0	nocov	1	1	0	1	0	0	1	nocov	0	0	0	1	nocov	1	1	1	1	0	1
O. sativa	IRIS_313-11021	cB(Bas)	cB	1	1	0	1	0	nocov	0	0	0	0	0	nocov	1	1	1	0	0	0	nocov	0	0	0	0	1	0	0	nocov	1	0	0	0	0	0	nocov	0	0	0	0	0	nocov	nocov	0	0	0	0	0
O. sativa	IRIS_313-11022	cB(Bas)	cB	1	1	0	1	0	nocov	0	nocov	0	nocov	nocov	1	1	1	1	0	1	0	nocov	0	0	0	nocov	0	0	0	nocov	1	0	0	1	0	0	nocov	0	0	0	0	0	nocov	nocov	0	1	nocov	0	0
O. sativa	IRIS_313-11023	cB(Bas)	cB	1	1	0	1	0	nocov	0	0	0	nocov	0	nocov	1	1	1	0	0	0	nocov	0	0	0	0	1	0	0	nocov	1	0	0	0	0	0	nocov	0	0	0	0	0	nocov	nocov	0	0	0	0	0
O. sativa	IRIS_313-11024	cA(Aus)	cA1	1	1	1	0	1	1	1	1	1	0	0	1	1	1	1	1	1	0	1	1	1	1	0	1	0	0	nocov	1	1	0	1	0	0	1	nocov	0	0	0	1	nocov	1	1	1	1	0	0
O. sativa	IRIS_313-11025	cA(Aus)	cA2	1	1	1	0	1	1	1	1	0	1	1	1	1	0	1	1	1	0	nocov	0	1	0	nocov	0	0	0	nocov	1	1	0	0	0	0	1	0	0	1	1	1	nocov	0	1	1	1	0	1
O. sativa	IRIS_313-11026	cB(Bas)	cB	1	1	0	1	0	nocov	0	0	1	0	0	0	1	0	1	0	0	0	nocov	0	0	0	nocov	0	0	0	1	1	1	0	nocov	0	0	nocov	0	1	nocov	0	0	nocov	nocov	0	0	1	0	0
O. sativa	IRIS_313-11027	cA(Aus)	cA1	1	1	1	0	1	1	1	1	1	0	1	1	1	0	1	1	1	0	1	1	1	1	0	1	0	0	0	1	1	0	0	0	0	1	nocov	0	nocov	1	0	nocov	1	1	1	1	0	0
O. sativa	IRIS_313-11028	cA(Aus)	cA-adm	1	1	1	0	1	1	1	1	1	1	0	nocov	1	1	1	1	1	0	1	0	1	1	0	0	0	0	nocov	1	1	0	1	0	0	1	0	0	1	0	1	nocov	0	1	0	1	0	0
O. sativa	IRIS_313-11029	cA(Aus)	cA1	1	1	1	0	1	1	1	1	1	nocov	nocov	1	1	0	1	1	1	0	1	1	1	1	0	1	0	0	nocov	1	1	0	1	0	0	1	0	0	nocov	0	1	nocov	1	1	1	1	0	0
O. sativa	IRIS_313-11030	cB(Bas)	cB	1	1	1	1	0	1	0	0	1	nocov	1	1	1	1	1	0	0	0	nocov	0	0	0	0	0	0	0	nocov	1	1	0	1	0	0	nocov	0	1	1	0	0	nocov	nocov	0	1	1	0	0
O. sativa	IRIS_313-11031	cA(Aus)	cA-adm	1	1	1	0	1	1	1	1	1	1	1	1	1	nocov	1	1	1	1	1	1	1	1	0	1	1	0	nocov	1	1	1	0	1	1	1	0	0	0	1	1	nocov	1	1	1	1	0	1
O. sativa	IRIS_313-11032	cB(Bas)	cB	1	1	0	0	0	nocov	1	0	1	0	0	1	1	1	1	0	1	0	1	1	0	0	0	0	0	0	nocov	1	0	0	1	0	1	nocov	0	1	0	0	0	nocov	0	1	1	0	0	1
O. sativa	IRIS_313-11033	admix	admix	1	1	1	1	1	1	1	1	1	1	0	0	1	1	1	1	1	0	1	1	1	0	1	1	0	0	nocov	1	1	1	1	0	1	1	0	1	0	1	1	nocov	1	1	1	1	0	0
O. sativa	IRIS_313-11034	cA(Aus)	cA-adm	1	1	1	0	1	1	1	1	1	0	1	1	1	nocov	1	1	1	0	0	1	1	0	0	1	0	0	nocov	1	1	0	1	0	0	1	nocov	0	1	0	1	nocov	0	1	0	1	0	0
O. sativa	IRIS_313-11035	admix	admix	1	1	1	0	1	1	1	1	1	1	1	1	1	1	1	1	1	0	1	1	1	1	1	1	0	0	nocov	1	1	0	1	0	0	1	0	0	1	0	1	nocov	1	1	1	1	0	0
O. sativa	IRIS_313-11036	cA(Aus)	cA-adm	1	1	0	1	0	nocov	1	0	0	0	0	1	1	1	1	0	1	0	nocov	1	0	0	0	1	0	0	nocov	1	0	0	1	0	0	nocov	0	0	0	0	0	nocov	nocov	1	1	1	0	0
O. sativa	IRIS_313-11037	cA(Aus)	cA1	1	1	1	0	1	1	1	1	1	0	1	1	1	1	1	1	1	0	1	0	1	0	0	1	0	0	nocov	1	1	0	0	0	0	1	0	0	1	0	0	nocov	1	1	1	1	0	0
O. sativa	IRIS_313-11038	XI-1A	XI-1A	1	1	1	0	1	1	1	1	1	1	1	1	1	1	1	1	1	1	1	1	1	1	1	1	1	1	1	1	1	1	1	1	1	1	1	0	0	1	1	1	1	1	1	1	0	1
O. sativa	IRIS_313-11039	XI-1A	XI-1A	1	1	1	0	1	1	1	1	1	1	1	1	1	1	1	1	1	1	1	1	1	1	1	1	1	1	1	1	1	1	1	1	1	1	1	0	0	1	1	1	1	1	1	1	0	1
O. sativa	IRIS_313-11040	XI-adm	XI-adm	1	1	1	0	1	1	1	1	1	1	nocov	1	1	1	1	1	0	1	1	0	1	1	1	1	1	1	1	1	1	1	1	1	0	1	1	1	1	1	1	nocov	1	0	1	1	1	1
O. sativa	IRIS_313-11041	XI-2	XI-2B	1	0	1	0	1	1	1	1	1	1	1	1	1	1	1	1	1	1	1	1	1	1	1	1	1	1	1	1	1	1	1	1	1	1	0	0	0	1	1	nocov	1	nocov	1	1	1	1
O. sativa	IRIS_313-11042	XI-adm	XI-adm	1	1	1	0	1	1	1	1	1	1	nocov	1	1	1	1	1	0	1	1	0	1	1	0	1	1	1	1	1	1	1	1	1	0	nocov	nocov	0	0	1	1	1	1	1	1	1	0	1
O. sativa	IRIS_313-11043	XI-3	XI-3A	1	1	1	0	1	1	1	1	1	1	1	1	1	1	0	1	0	1	1	1	1	1	1	1	1	1	1	1	1	1	1	1	1	1	0	0	1	0	1	nocov	1	nocov	1	1	1	1
O. sativa	IRIS_313-11044	GJ-trp	GJ-trop1	0	0	0	1	0	nocov	0	0	0	1	0	0	1	0	0	0	0	0	0	0	0	0	0	0	0	0	nocov	0	0	nocov	0	0	0	nocov	0	1	0	0	0	nocov	nocov	0	0	0	0	0
O. sativa	IRIS_313-11045	GJ-trp	GJ-trop1	0	0	0	1	0	1	0	0	0	1	0	0	1	0	0	0	0	0	nocov	0	1	0	0	0	0	0	nocov	1	0	nocov	0	0	0	nocov	0	1	0	1	0	nocov	1	0	0	0	0	0
O. sativa	IRIS_313-11046	GJ-trp	GJ-trop1	0	0	1	1	0	nocov	0	0	0	1	0	0	1	0	0	0	0	0	nocov	0	0	0	0	0	0	0	1	1	0	nocov	0	0	0	nocov	0	1	0	1	0	0	nocov	0	0	0	0	0
O. sativa	IRIS_313-11047	cA(Aus)	cA1	1	1	1	0	1	1	1	1	1	0	1	1	1	0	1	1	1	0	1	1	1	1	0	1	0	0	nocov	1	1	0	0	1	0	nocov	0	0	1	0	1	nocov	1	1	1	1	0	0
O. sativa	IRIS_313-11048	cA(Aus)	cA1	1	1	1	0	1	1	1	1	1	0	1	1	1	1	1	1	1	0	1	1	1	1	0	1	0	0	nocov	1	1	0	0	0	0	nocov	0	0	nocov	0	1	nocov	1	1	1	1	0	0
O. sativa	IRIS_313-11049	cA(Aus)	cA-adm	1	1	1	0	1	1	1	1	1	0	1	1	1	1	1	1	1	0	1	1	1	1	0	0	0	0	nocov	1	1	1	0	0	0	nocov	nocov	0	0	0	1	nocov	1	1	0	1	0	0
O. sativa	IRIS_313-11050	cA(Aus)	cA2	1	1	1	0	1	1	1	1	1	0	1	1	1	1	1	1	1	0	nocov	nocov	1	0	0	0	0	0	nocov	1	1	0	0	0	0	1	0	0	0	0	0	nocov	1	1	0	1	0	0
O. sativa	IRIS_313-11051	cA(Aus)	cA2	1	1	1	0	1	1	1	1	1	1	1	1	1	1	1	1	1	0	nocov	0	0	0	0	0	0	0	nocov	nocov	0	0	0	0	0	0	0	0	1	1	0	nocov	1	1	0	1	0	1
O. sativa	IRIS_313-11052	cA(Aus)	cA-adm	1	1	1	0	1	1	1	1	1	0	1	nocov	1	1	1	1	1	0	nocov	1	1	1	0	0	0	0	nocov	1	1	0	0	0	0	0	0	0	1	0	1	nocov	1	1	1	1	0	1
O. sativa	IRIS_313-11053	cA(Aus)	cA1	1	1	1	0	1	1	1	1	1	0	1	1	1	1	1	1	1	0	1	1	1	1	0	1	0	0	nocov	1	1	0	0	0	0	1	0	0	1	0	1	nocov	1	0	1	1	0	0
O. sativa	IRIS_313-11054	cA(Aus)	cA2	1	1	1	0	1	1	1	1	1	1	1	1	1	1	1	1	1	0	nocov	1	0	1	0	0	0	0	nocov	nocov	0	0	0	0	0	0	nocov	0	1	0	0	nocov	1	1	0	1	0	1
O. sativa	IRIS_313-11055	cA(Aus)	cA2	1	1	1	0	1	1	1	1	1	1	1	1	1	1	1	1	1	0	1	0	1	1	0	0	0	0	nocov	1	1	0	0	0	0	nocov	nocov	0	1	0	1	nocov	1	1	0	0	0	1
O. sativa	IRIS_313-11056	cA(Aus)	cA2	1	1	1	0	1	1	1	1	1	nocov	1	1	1	1	1	1	1	0	nocov	1	1	0	0	0	0	0	nocov	1	1	1	0	0	1	1	0	0	0	0	1	nocov	1	1	0	1	0	0
O. sativa	IRIS_313-11057	cA(Aus)	cA2	1	1	1	0	1	1	1	1	1	1	1	1	1	1	1	1	1	0	nocov	1	0	1	0	0	0	0	nocov	nocov	0	0	0	0	0	0	0	0	1	0	0	nocov	1	1	0	1	0	1
O. sativa	IRIS_313-11058	cA(Aus)	cA-adm	1	1	1	0	1	1	1	1	1	0	1	1	1	1	1	1	1	0	nocov	1	1	1	0	0	0	0	nocov	1	1	1	0	0	0	1	nocov	0	0	0	0	nocov	1	0	0	1	0	0
O. sativa	IRIS_313-11059	cA(Aus)	cA2	1	1	1	0	1	1	1	1	1	nocov	1	1	1	1	1	1	1	0	0	1	1	1	0	0	1	0	nocov	1	1	1	0	0	0	nocov	nocov	0	0	1	1	nocov	1	0	1	1	0	0
O. sativa	IRIS_313-11060	cA(Aus)	cA1	1	1	1	0	1	1	1	1	1	0	1	nocov	1	1	1	1	1	0	1	1	1	1	0	0	0	0	nocov	1	1	0	0	0	0	1	nocov	0	0	0	1	nocov	1	1	1	1	0	1
O. sativa	IRIS_313-11061	cA(Aus)	cA1	1	1	1	0	1	1	1	1	1	0	0	nocov	1	1	1	1	1	0	1	1	1	1	0	0	0	0	nocov	1	1	0	0	1	0	1	0	0	1	0	0	nocov	1	1	1	1	0	0
O. sativa	IRIS_313-11062	cB(Bas)	cB	0	0	1	1	0	nocov	0	0	1	0	0	0	nocov	1	1	0	0	0	nocov	0	0	0	0	0	0	0	nocov	1	1	0	0	0	0	nocov	0	1	0	0	0	0	0	0	0	0	0	0
O. sativa	IRIS_313-11063	cA(Aus)	cA2	1	1	1	0	1	1	1	1	1	1	nocov	1	1	1	1	1	1	0	1	nocov	1	1	0	0	0	0	nocov	1	0	0	0	0	0	0	nocov	0	1	1	0	nocov	1	0	0	1	0	1
O. sativa	IRIS_313-11064	cA(Aus)	cA2	1	1	1	0	1	1	1	1	1	1	nocov	1	1	1	1	1	1	0	1	0	1	1	0	0	0	0	nocov	1	0	0	0	0	0	0	nocov	0	1	0	0	nocov	1	0	0	0	0	1
O. sativa	IRIS_313-11065	cA(Aus)	cA2	1	1	1	0	1	1	1	1	1	1	nocov	1	1	1	1	1	1	0	1	0	1	1	nocov	0	0	0	nocov	1	0	0	nocov	0	0	0	nocov	0	1	0	0	nocov	1	0	0	0	0	1
O. sativa	IRIS_313-11066	admix	admix	nocov	0	1	1	1	nocov	0	0	1	nocov	0	0	nocov	1	1	0	0	0	1	0	0	1	0	0	0	0	nocov	1	1	0	0	0	0	nocov	0	1	0	0	0	nocov	0	0	0	0	0	0
O. sativa	IRIS_313-11067	cA(Aus)	cA2	1	1	1	0	1	1	1	1	1	1	nocov	nocov	1	1	1	1	1	0	1	nocov	1	1	0	0	0	0	nocov	1	0	0	0	0	0	0	nocov	0	nocov	1	0	nocov	1	0	0	1	0	1
O. sativa	IRIS_313-11068	cB(Bas)	cB	0	0	0	1	0	nocov	0	0	1	0	nocov	0	nocov	1	1	0	0	0	nocov	0	0	0	0	0	0	0	nocov	1	0	0	0	0	0	nocov	0	1	0	nocov	0	nocov	nocov	0	0	0	0	0
O. sativa	IRIS_313-11069	cB(Bas)	cB	nocov	0	1	1	0	nocov	0	0	1	0	0	0	nocov	1	1	0	0	0	1	0	0	0	0	0	0	0	nocov	1	0	0	0	0	0	nocov	0	1	0	0	0	nocov	0	0	0	0	0	0
O. sativa	IRIS_313-11070	admix	admix	nocov	0	1	1	0	nocov	0	0	1	0	0	0	nocov	1	1	1	0	0	1	0	0	1	0	0	0	0	nocov	1	0	0	0	0	0	nocov	0	1	0	0	0	nocov	0	0	0	0	0	0
O. sativa	IRIS_313-11071	XI-adm	XI-3B2	1	1	1	0	1	1	1	1	1	1	1	1	1	1	1	1	0	1	1	1	1	1	1	1	1	1	1	1	1	1	1	1	1	nocov	1	0	1	1	1	0	1	1	1	1	1	1
O. sativa	IRIS_313-11072	XI-3	XI-3B1	1	1	1	0	1	1	1	1	1	1	1	1	1	1	1	1	0	1	1	1	1	1	1	1	1	1	1	1	1	1	1	1	1	1	1	0	1	0	1	1	1	nocov	1	1	1	1
O. sativa	IRIS_313-11073	GJ-sbtrp	GJ-subtrp	0	1	1	1	0	0	0	0	0	0	0	0	1	0	0	0	0	0	nocov	0	0	0	0	0	0	0	nocov	nocov	0	nocov	nocov	0	0	nocov	0	1	0	nocov	1	0	0	0	0	0	0	0
O. sativa	IRIS_313-11074	XI-3	XI-3B1	1	1	1	0	1	1	1	1	1	1	1	1	1	1	1	1	0	1	1	1	1	1	1	1	1	1	1	1	1	1	1	1	1	1	1	0	1	0	1	1	1	1	0	1	1	1
O. sativa	IRIS_313-11075	GJ-adm	GJ-adm	0	0	nocov	1	0	nocov	0	0	0	0	0	0	nocov	0	0	0	0	0	nocov	0	0	0	nocov	0	0	1	nocov	1	0	nocov	0	0	0	nocov	0	1	0	0	1	0	nocov	0	0	0	0	0
O. sativa	IRIS_313-11076	XI-3	XI-3B1	1	0	1	0	1	1	1	1	1	1	1	1	1	1	1	1	0	1	1	1	1	1	1	1	1	1	1	1	1	1	1	1	1	1	1	0	1	1	1	1	1	nocov	1	1	1	1
O. sativa	IRIS_313-11077	GJ-sbtrp	GJ-subtrp	0	1	0	1	0	nocov	0	0	0	0	0	0	1	0	0	0	0	0	nocov	0	0	0	nocov	0	0	0	nocov	1	0	nocov	0	0	0	nocov	0	1	0	0	1	nocov	0	0	0	0	0	0
O. sativa	IRIS_313-11078	XI-adm	XI-adm	1	1	1	0	1	1	1	1	1	1	1	1	1	1	1	1	1	1	1	1	1	1	1	1	1	1	1	1	1	1	1	1	1	1	1	0	0	0	0	1	1	1	1	1	1	1
O. sativa	IRIS_313-11079	XI-3	XI-3B1	1	1	1	0	1	1	1	1	1	1	1	1	1	1	1	1	0	1	1	1	1	1	1	1	1	1	1	1	1	1	1	1	0	1	1	0	1	1	1	1	1	1	1	1	1	1
O. sativa	IRIS_313-11080	XI-3	XI-3B	1	1	1	0	1	1	1	nocov	1	1	1	0	1	1	1	1	1	1	1	1	1	1	1	1	1	1	1	1	1	1	1	1	1	1	1	0	1	1	1	0	1	nocov	1	1	1	1
O. sativa	IRIS_313-11081	XI-3	XI-3B1	1	1	1	0	1	1	1	1	1	1	1	1	1	1	1	1	0	1	1	1	1	1	1	1	1	1	1	1	1	1	1	1	1	1	1	0	1	1	1	1	1	1	1	1	1	1
O. sativa	IRIS_313-11082	XI-3	XI-3B1	1	1	1	0	1	1	1	1	1	1	1	1	1	1	1	1	0	1	1	1	1	1	1	1	1	1	1	1	1	1	1	1	1	nocov	1	0	1	0	1	1	1	1	0	1	1	1
O. sativa	IRIS_313-11083	XI-3	XI-3B1	1	1	1	0	1	1	1	1	1	1	1	1	1	1	1	1	0	1	1	1	1	1	1	1	1	1	1	1	1	1	0	1	1	1	1	0	0	0	1	1	1	nocov	1	1	1	1
O. sativa	IRIS_313-11084	XI-3	XI-3B1	1	nocov	1	0	1	1	1	1	1	1	1	1	1	1	1	1	0	1	1	1	1	1	1	1	1	1	1	1	1	1	1	0	0	1	1	0	1	0	1	1	1	1	1	1	1	1
O. sativa	IRIS_313-11085	XI-adm	XI-3B	1	1	1	0	1	1	1	1	0	1	1	1	1	1	0	1	1	1	1	1	1	1	1	1	1	1	1	1	1	1	0	0	1	nocov	1	0	0	1	1	0	1	nocov	1	1	1	1
O. sativa	IRIS_313-11086	XI-3	XI-3B1	1	1	1	0	1	1	1	1	1	1	1	1	1	1	1	1	0	1	1	1	1	1	1	1	1	1	1	1	1	1	0	1	0	1	1	0	1	0	1	1	1	nocov	1	1	1	1
O. sativa	IRIS_313-11087	XI-3	XI-3B1	1	1	1	0	1	1	1	1	1	1	1	1	1	1	1	1	0	1	1	1	1	1	1	1	1	1	nocov	1	1	1	1	1	0	nocov	nocov	0	1	1	1	1	1	1	1	1	1	1
O. sativa	IRIS_313-11088	XI-3	XI-3B1	1	1	1	0	1	1	1	1	1	1	1	1	1	1	1	1	0	1	1	1	1	1	1	1	1	1	1	1	1	1	1	1	1	1	1	0	1	0	1	1	1	nocov	1	1	1	1
O. sativa	IRIS_313-11089	XI-3	XI-3B	1	1	1	0	1	1	1	1	1	1	1	1	1	1	1	1	0	1	1	1	1	1	1	1	1	1	1	1	1	1	1	0	1	1	1	0	1	0	1	nocov	1	1	1	1	1	1
O. sativa	IRIS_313-11090	XI-3	XI-3B1	1	0	1	0	1	1	1	1	1	1	1	1	1	1	1	1	0	1	1	1	1	1	1	1	1	1	1	1	1	1	1	1	1	1	1	0	1	0	1	1	1	nocov	1	1	1	1
O. sativa	IRIS_313-11091	XI-adm	XI-3B	1	1	1	0	1	1	1	1	1	1	1	1	1	1	1	1	1	1	1	1	1	1	1	1	1	1	1	1	1	1	1	0	1	1	1	0	0	1	1	nocov	1	nocov	1	1	1	1
O. sativa	IRIS_313-11092	admix	admix	1	1	1	1	1	1	1	1	1	1	1	1	1	1	1	1	1	1	1	1	1	1	1	1	1	1	nocov	1	1	1	1	1	1	1	1	1	0	1	1	1	1	0	1	1	1	1
O. sativa	IRIS_313-11093	GJ-sbtrp	GJ-subtrp	1	0	0	1	0	1	0	0	0	0	0	0	1	0	0	0	0	0	nocov	0	0	0	nocov	0	0	0	nocov	1	0	nocov	0	0	0	nocov	0	1	0	0	1	nocov	nocov	0	0	0	0	0
O. sativa	IRIS_313-11094	GJ-sbtrp	GJ-subtrp	1	0	0	1	0	nocov	0	1	0	0	0	0	1	0	0	0	0	0	nocov	0	1	0	0	0	0	0	nocov	1	0	nocov	0	0	0	1	0	1	0	0	1	nocov	0	0	0	0	0	0
O. sativa	IRIS_313-11095	XI-3	XI-3B1	1	1	1	1	1	1	1	1	1	1	1	1	1	1	1	1	0	1	1	1	1	1	1	1	1	1	1	1	1	1	1	1	1	1	1	1	1	0	1	1	1	0	1	1	1	1
O. sativa	IRIS_313-11096	XI-3	XI-3B1	1	nocov	1	0	1	1	1	1	1	1	1	1	1	1	1	1	0	1	1	1	1	1	1	1	1	1	1	1	1	1	1	0	1	1	1	0	1	0	1	1	1	nocov	0	1	0	1
O. sativa	IRIS_313-11097	XI-adm	XI-3B2	1	1	1	0	1	1	1	1	1	1	1	1	1	1	0	1	1	1	1	1	1	1	1	1	1	1	1	1	1	1	1	0	1	1	0	0	1	1	1	1	1	1	1	0	1	1
O. sativa	IRIS_313-11098	XI-3	XI-3A	1	1	1	0	1	1	1	1	1	1	1	1	1	1	1	1	1	1	1	1	1	1	1	1	1	1	1	1	1	1	1	1	1	1	1	0	1	1	1	1	1	0	1	1	1	1
O. sativa	IRIS_313-11099	XI-2	XI-2A	1	1	1	0	1	1	1	1	1	1	1	1	1	1	1	1	0	1	1	1	1	1	1	1	1	1	1	1	1	1	1	1	0	1	0	0	0	0	1	1	1	1	1	1	1	1
O. sativa	IRIS_313-11100	GJ-trp	GJ-trop1	0	0	0	1	0	1	0	0	0	1	0	0	1	0	0	0	0	0	nocov	0	0	0	0	0	0	1	0	1	0	nocov	0	0	0	nocov	0	1	0	1	0	nocov	0	0	1	0	0	0
O. sativa	IRIS_313-11101	XI-adm	XI-3B	1	0	1	0	1	1	1	1	1	1	1	1	1	1	1	1	0	1	1	1	1	1	1	1	1	1	1	1	1	1	1	1	0	1	nocov	0	1	0	1	1	1	1	1	1	1	1
O. sativa	IRIS_313-11102	GJ-trp	GJ-trop1	0	1	0	1	0	nocov	0	0	0	1	0	0	1	0	0	0	0	0	0	0	0	0	0	0	0	1	nocov	1	1	nocov	0	0	0	nocov	0	1	0	0	0	0	0	0	0	0	0	0
O. sativa	IRIS_313-11103	GJ-trp	GJ-trop1	0	1	0	1	0	1	0	0	0	0	0	0	1	0	0	0	0	0	nocov	0	0	0	0	0	0	0	nocov	1	0	nocov	0	0	0	nocov	0	1	0	0	0	nocov	0	0	0	0	0	0
O. sativa	IRIS_313-11104	GJ-trp	GJ-trop1	0	1	0	1	0	1	0	0	0	0	0	0	1	0	0	0	0	0	nocov	0	0	0	0	0	0	0	nocov	1	1	nocov	0	0	0	nocov	0	1	0	0	0	nocov	0	0	0	0	0	0
O. sativa	IRIS_313-11105	GJ-trp	GJ-trop1	0	0	nocov	1	0	1	0	0	0	0	0	0	1	0	0	0	nocov	0	nocov	0	0	0	nocov	0	0	1	nocov	nocov	0	nocov	0	0	0	nocov	0	1	0	nocov	0	nocov	nocov	0	0	0	0	0
O. sativa	IRIS_313-11106	GJ-trp	GJ-trop1	nocov	0	0	1	0	nocov	0	0	0	0	0	nocov	1	0	0	0	0	nocov	nocov	0	0	0	0	0	0	0	nocov	1	0	nocov	nocov	0	0	nocov	0	1	0	0	0	0	nocov	0	0	0	0	0
O. sativa	IRIS_313-11107	GJ-trp	GJ-trop1	nocov	1	0	1	0	nocov	0	0	0	0	nocov	0	1	0	0	0	0	0	nocov	0	0	0	nocov	0	0	0	nocov	1	0	nocov	nocov	0	0	nocov	0	1	0	0	0	nocov	nocov	0	0	nocov	0	0
O. sativa	IRIS_313-11108	XI-3	XI-3A	1	1	1	0	1	1	1	1	1	1	1	1	1	1	1	1	0	1	1	1	1	1	1	1	0	1	1	1	1	1	1	1	1	1	nocov	0	1	0	1	1	1	0	1	1	1	1
O. sativa	IRIS_313-11109	GJ-trp	GJ-trop1	0	0	0	1	0	1	0	0	0	0	0	0	1	0	0	0	0	0	nocov	0	0	0	0	0	0	1	nocov	1	0	nocov	nocov	0	0	nocov	0	1	0	nocov	0	nocov	0	0	0	0	0	0
O. sativa	IRIS_313-11110	XI-2	XI-2B	1	1	1	0	1	1	1	1	0	1	nocov	1	1	1	1	1	1	1	1	1	1	0	1	1	1	1	1	nocov	1	1	0	1	1	1	nocov	0	nocov	1	1	1	1	1	1	1	1	1
O. sativa	IRIS_313-11111	cA(Aus)	cA2	1	nocov	1	0	1	1	1	1	1	1	1	1	1	1	1	1	1	0	nocov	1	1	1	nocov	0	0	0	nocov	1	1	1	nocov	0	0	1	0	0	0	0	1	nocov	1	0	0	1	0	0
O. sativa	IRIS_313-11112	cA(Aus)	cA2	1	1	1	0	1	nocov	1	1	1	0	1	1	1	0	1	1	1	0	0	1	1	1	0	0	0	0	nocov	1	0	0	0	0	0	nocov	nocov	0	0	0	1	nocov	1	1	1	1	0	1
O. sativa	IRIS_313-11113	XI-2	XI-2	1	1	1	0	1	1	1	1	1	1	1	1	1	1	1	1	1	1	1	1	1	1	1	1	1	1	1	1	1	1	1	1	1	1	1	0	1	1	1	nocov	1	nocov	0	1	1	1
O. sativa	IRIS_313-11114	XI-2	XI-2A	1	nocov	1	0	1	1	1	1	1	1	1	1	1	0	1	1	0	1	1	1	1	1	1	1	1	1	nocov	1	1	1	1	1	1	nocov	1	0	1	0	0	1	nocov	nocov	0	1	1	1
O. sativa	IRIS_313-11115	XI-2	XI-2A	1	1	1	0	1	1	1	1	1	nocov	1	1	1	1	1	1	0	1	1	nocov	1	1	1	1	1	1	1	1	1	1	1	1	1	nocov	1	0	1	1	1	nocov	1	nocov	0	1	0	1
O. sativa	IRIS_313-11116	cA(Aus)	cA2	1	0	1	0	1	1	1	1	1	1	1	1	1	1	1	1	1	0	nocov	1	1	0	0	1	0	0	nocov	1	0	0	0	0	0	nocov	nocov	0	nocov	0	0	nocov	1	1	1	1	0	nocov
O. sativa	IRIS_313-11117	GJ-trp	GJ-trop1	0	0	1	1	0	nocov	0	0	0	1	nocov	0	1	nocov	0	0	0	0	nocov	0	0	0	nocov	0	0	1	nocov	1	0	nocov	nocov	0	0	nocov	0	1	0	0	0	nocov	1	0	1	0	0	0
O. sativa	IRIS_313-11118	XI-3	XI-3B1	1	1	1	0	1	1	1	1	1	1	1	1	1	1	1	1	0	1	1	1	1	1	1	1	1	1	1	1	1	1	1	0	1	1	1	0	1	1	1	nocov	1	nocov	1	1	1	1
O. sativa	IRIS_313-11119	XI-adm	XI-3	1	1	1	0	1	1	1	1	1	1	1	1	1	1	1	1	0	1	1	1	1	1	1	1	1	1	nocov	1	0	1	1	0	1	0	1	0	0	0	1	1	1	nocov	1	1	0	1
O. sativa	IRIS_313-11120	XI-2	XI-2	1	1	1	0	1	1	1	1	1	1	1	1	1	1	1	1	1	1	1	1	1	1	1	1	1	1	1	1	1	1	1	1	1	1	nocov	0	0	0	1	nocov	1	1	1	1	1	1
O. sativa	IRIS_313-11121	GJ-trp	GJ-trop1	0	0	nocov	1	nocov	1	0	0	0	1	0	0	1	0	0	0	0	0	nocov	0	0	0	nocov	0	0	0	nocov	1	0	nocov	nocov	0	0	nocov	0	1	0	1	0	nocov	0	0	1	0	0	0
O. sativa	IRIS_313-11122	XI-1B	XI-1B	1	1	1	0	1	1	1	1	1	1	1	1	1	1	1	1	0	1	1	1	1	1	0	1	1	1	1	1	1	1	1	1	1	1	0	0	0	0	1	nocov	1	nocov	1	1	1	1
O. sativa	IRIS_313-11123	cA(Aus)	cA2	1	1	1	0	1	1	1	1	1	nocov	1	1	1	1	1	1	1	0	nocov	0	1	0	0	0	0	0	nocov	1	1	0	1	0	0	0	nocov	0	0	0	1	nocov	1	nocov	0	1	0	1
O. sativa	IRIS_313-11124	admix	cA2	1	1	1	0	1	1	1	1	1	1	1	1	1	1	1	1	1	0	1	0	1	0	nocov	0	0	0	nocov	1	1	0	1	0	0	1	nocov	0	1	0	1	nocov	1	nocov	1	1	0	1
O. sativa	IRIS_313-11125	admix	admix	nocov	1	1	0	1	1	1	0	1	1	1	0	1	1	1	0	1	0	1	nocov	0	0	nocov	0	0	0	nocov	1	1	nocov	0	1	1	1	0	0	1	0	1	nocov	1	1	1	1	0	0
O. sativa	IRIS_313-11126	XI-adm	XI-3	1	1	1	0	1	1	1	1	1	1	1	1	1	nocov	1	1	0	1	1	1	1	1	1	1	1	1	1	1	1	1	1	1	1	1	1	0	1	1	1	1	1	nocov	1	1	1	1
O. sativa	IRIS_313-11127	GJ-sbtrp	GJ-subtrp	0	0	0	1	0	nocov	0	0	0	0	0	0	1	0	0	0	0	0	nocov	0	0	0	0	0	0	0	nocov	1	0	nocov	nocov	0	0	nocov	0	1	0	0	1	nocov	nocov	0	0	0	0	0
O. sativa	IRIS_313-11128	XI-adm	XI-adm	1	1	1	0	1	1	1	1	1	1	1	1	1	1	1	1	0	1	1	1	1	1	1	1	1	1	1	1	1	1	1	1	0	1	1	0	1	0	1	1	1	1	1	1	1	1
O. sativa	IRIS_313-11129	XI-adm	XI-adm	1	0	1	0	1	1	1	1	1	1	0	1	1	1	1	0	0	1	1	1	1	1	1	1	1	0	1	1	1	1	1	nocov	1	1	1	0	1	1	1	nocov	1	nocov	1	1	1	1
O. sativa	IRIS_313-11130	XI-adm	XI-adm	nocov	1	1	1	1	1	1	1	1	1	1	1	1	nocov	1	1	0	1	1	1	1	1	1	1	1	1	nocov	1	1	1	1	1	1	1	1	0	1	0	0	1	1	1	1	1	1	1
O. sativa	IRIS_313-11131	XI-adm	XI-adm	1	1	1	0	1	1	1	1	1	1	1	1	1	1	1	1	0	0	1	1	1	1	0	1	1	1	1	1	1	1	0	1	0	nocov	1	0	1	1	1	1	1	1	1	1	1	1
O. sativa	IRIS_313-11132	XI-adm	XI-3B1	1	0	1	0	1	1	1	1	1	1	1	1	1	1	1	1	0	1	1	1	1	1	1	1	1	1	1	1	1	1	1	1	1	1	1	0	1	1	1	1	1	1	1	1	1	1
O. sativa	IRIS_313-11133	XI-3	XI-3B1	1	0	1	0	1	1	1	1	1	1	1	1	1	1	1	1	0	1	1	1	1	1	1	1	1	1	1	1	1	1	0	1	1	1	1	0	0	0	1	1	1	1	1	1	1	1
O. sativa	IRIS_313-11134	XI-adm	XI-3B	1	1	1	0	1	1	1	1	1	1	1	1	1	nocov	1	1	0	1	1	1	1	1	1	1	1	1	1	1	1	1	1	1	0	nocov	1	0	1	0	1	nocov	0	nocov	1	1	1	1
O. sativa	IRIS_313-11135	XI-3	XI-3B	1	1	1	0	1	1	1	1	1	1	1	1	1	nocov	1	1	0	1	1	1	1	1	1	1	1	1	1	1	1	1	1	1	0	1	1	0	1	0	1	1	1	1	1	1	1	1
O. sativa	IRIS_313-11136	admix	admix	1	0	1	1	0	1	0	nocov	0	1	1	1	1	1	1	0	0	1	nocov	0	0	0	0	1	0	0	1	0	1	0	0	1	0	nocov	1	0	1	1	0	1	1	nocov	1	0	1	0
O. sativa	IRIS_313-11137	XI-adm	XI-adm	1	1	1	0	1	1	1	1	1	1	1	1	1	1	1	1	1	1	1	1	1	1	0	1	1	1	1	1	1	1	1	1	0	1	1	0	0	1	1	1	1	1	0	1	1	1
O. sativa	IRIS_313-11138	XI-3	XI-3B	1	0	1	0	1	1	1	1	1	1	1	1	1	1	1	1	1	1	1	1	1	1	1	1	1	1	1	1	1	1	1	1	1	1	1	0	1	0	1	nocov	1	nocov	0	1	1	1
O. sativa	IRIS_313-11139	XI-adm	XI-adm	1	1	1	0	1	1	1	1	1	1	1	1	1	nocov	1	1	0	1	1	1	1	1	nocov	1	1	1	1	1	1	1	0	1	0	1	1	0	1	1	1	1	1	nocov	nocov	1	1	1
O. sativa	IRIS_313-11140	XI-3	XI-3	1	1	1	0	1	1	1	1	1	1	1	1	1	nocov	1	1	1	1	1	1	1	1	1	1	1	1	1	1	1	1	1	1	1	1	1	0	1	1	1	nocov	1	nocov	1	1	1	1
O. sativa	IRIS_313-11141	XI-adm	XI-adm	1	1	1	0	1	1	1	1	1	1	1	1	1	1	1	1	0	1	1	1	1	1	1	1	1	1	1	1	1	1	1	0	1	1	nocov	0	1	0	1	nocov	1	nocov	1	1	1	1
O. sativa	IRIS_313-11142	XI-3	XI-3	1	1	1	0	1	1	1	1	1	1	1	1	1	1	1	1	0	1	1	0	1	1	1	1	1	1	1	1	1	1	1	1	1	1	1	0	1	1	1	1	1	1	1	1	1	1
O. sativa	IRIS_313-11143	XI-adm	XI-adm	1	1	1	0	1	1	1	1	1	1	1	1	1	0	1	1	1	1	1	1	1	1	1	1	1	1	1	1	1	1	1	1	1	1	1	1	1	1	0	1	1	nocov	1	1	1	1
O. sativa	IRIS_313-11144	XI-adm	XI-adm	1	0	1	0	1	1	1	1	1	1	1	1	1	1	1	1	0	1	1	1	1	1	1	1	1	1	1	1	1	1	1	1	1	1	1	0	1	1	1	1	1	nocov	1	0	1	1
O. sativa	IRIS_313-11145	XI-3	XI-3B1	1	1	1	0	1	1	1	1	1	1	1	1	1	1	1	1	0	1	1	0	1	1	1	1	1	1	1	1	1	1	1	1	0	1	1	0	1	0	1	1	1	1	1	1	0	1
O. sativa	IRIS_313-11146	XI-adm	XI-adm	1	nocov	1	0	1	1	1	1	1	1	1	1	1	1	1	1	0	1	1	1	1	1	1	1	1	1	1	1	1	1	1	1	1	1	1	0	1	1	1	1	1	1	1	0	1	1
O. sativa	IRIS_313-11147	XI-adm	XI-2A	1	0	1	0	1	1	1	1	1	1	1	1	1	1	1	1	0	1	1	1	1	1	1	1	0	1	1	1	1	1	1	1	1	1	1	0	1	1	1	1	1	nocov	0	1	1	1
O. sativa	IRIS_313-11148	XI-3	XI-3B	1	0	1	0	1	1	1	1	1	1	1	1	1	1	1	1	0	1	1	1	1	1	1	1	1	1	1	1	1	1	1	1	1	nocov	1	0	1	1	1	nocov	1	nocov	0	1	1	1
O. sativa	IRIS_313-11149	XI-3	XI-3B1	1	1	1	0	1	1	1	1	1	1	1	1	1	1	1	1	0	1	1	1	1	1	1	1	1	1	nocov	1	1	1	1	0	0	nocov	0	0	1	0	1	1	1	1	1	1	1	1
O. sativa	IRIS_313-11150	XI-3	XI-3B1	1	0	1	0	1	1	1	1	1	1	1	1	1	1	1	1	0	1	1	1	1	1	1	1	1	1	1	1	1	1	1	nocov	0	1	1	0	1	1	1	1	1	1	1	1	0	1
O. sativa	IRIS_313-11151	XI-3	XI-3B1	1	1	1	0	1	1	1	1	1	1	1	1	1	1	1	1	0	1	1	1	1	1	1	1	1	1	1	1	1	1	1	0	0	1	1	0	1	1	1	nocov	1	0	1	1	1	1
O. sativa	IRIS_313-11152	XI-1A	XI-1A	1	1	1	0	1	nocov	nocov	1	1	1	1	1	1	1	1	1	1	1	1	1	1	1	1	1	1	1	nocov	1	1	1	0	1	1	1	1	0	0	1	1	1	1	1	1	1	1	1
O. sativa	IRIS_313-11153	GJ-tmp	GJ-temp	0	0	0	1	1	nocov	0	0	1	0	1	0	1	1	1	1	1	1	1	1	1	0	0	1	1	1	nocov	1	1	0	0	1	1	nocov	1	1	0	1	0	nocov	0	0	1	1	0	0
O. sativa	IRIS_313-11154	cA(Aus)	cA2	1	1	1	0	1	1	1	1	1	nocov	1	nocov	1	1	1	1	1	0	1	1	1	0	0	nocov	0	0	nocov	1	1	0	0	0	0	nocov	nocov	0	0	0	nocov	nocov	1	1	0	1	0	0
O. sativa	IRIS_313-11155	GJ-tmp	GJ-temp	1	nocov	nocov	1	0	nocov	nocov	0	0	1	nocov	0	1	0	0	0	0	0	nocov	0	0	0	0	0	0	0	nocov	nocov	0	nocov	0	0	0	nocov	0	1	0	1	0	nocov	0	0	0	0	1	0
O. sativa	IRIS_313-11156	GJ-adm	GJ-adm	nocov	nocov	0	1	0	nocov	0	0	0	1	nocov	0	1	nocov	0	0	0	0	nocov	0	0	0	0	0	0	1	nocov	0	1	nocov	0	0	0	nocov	0	1	0	0	0	nocov	1	0	0	nocov	0	0
O. sativa	IRIS_313-11157	XI-1A	XI-1A	1	1	1	0	1	nocov	0	1	1	1	1	1	1	1	1	1	1	1	1	1	1	1	1	1	1	1	1	1	1	1	0	1	1	1	1	0	0	1	1	1	1	nocov	1	1	1	1
O. sativa	IRIS_313-11158	XI-1A	XI-1A	1	1	1	0	1	1	1	1	1	1	1	1	1	1	1	1	1	1	1	1	1	1	1	1	1	1	1	1	1	1	0	1	1	1	1	0	0	1	1	1	1	1	1	1	1	1
O. sativa	IRIS_313-11159	GJ-trp	GJ-trop1	nocov	0	1	1	0	nocov	0	0	0	1	nocov	0	1	0	0	0	0	nocov	nocov	0	0	0	0	0	0	0	nocov	1	0	nocov	0	0	0	nocov	0	0	0	1	0	0	0	nocov	1	0	0	0
O. sativa	IRIS_313-11160	XI-3	XI-3A	1	1	1	0	1	1	1	1	1	1	1	1	1	nocov	1	1	1	1	1	1	1	1	0	1	0	1	1	1	1	1	1	1	1	1	nocov	0	1	0	1	nocov	1	0	1	1	1	1
O. sativa	IRIS_313-11161	GJ-trp	GJ-trop1	nocov	1	0	1	0	nocov	0	0	0	0	nocov	0	1	0	0	0	0	0	nocov	0	0	0	0	0	0	0	nocov	1	1	nocov	0	0	0	nocov	0	1	0	0	0	nocov	0	0	0	0	0	0
O. sativa	IRIS_313-11162	XI-1B	XI-1B1	1	1	1	0	1	1	1	1	1	1	1	1	1	1	1	1	1	1	1	1	1	1	1	1	1	1	1	1	1	1	1	1	1	1	nocov	0	0	1	0	nocov	1	1	1	1	0	1
O. sativa	IRIS_313-11163	cA(Aus)	cA2	1	1	1	0	1	1	1	1	1	1	1	1	1	1	1	1	1	0	nocov	nocov	0	0	0	0	0	0	nocov	nocov	0	1	0	0	0	nocov	nocov	0	1	1	0	nocov	1	1	0	1	0	1
O. sativa	IRIS_313-11164	cA(Aus)	cA1	1	1	1	0	1	1	1	1	1	0	1	1	1	1	1	1	1	0	1	1	1	1	0	0	0	0	nocov	1	1	1	0	0	0	1	0	0	0	1	1	nocov	1	1	1	1	0	0
O. sativa	IRIS_313-11165	cA(Aus)	cA-adm	1	1	1	0	1	1	1	1	1	1	1	1	1	1	1	1	1	1	1	1	1	0	1	1	0	0	nocov	1	1	1	0	0	1	1	nocov	0	0	1	1	nocov	1	1	1	1	0	1
O. sativa	IRIS_313-11166	cA(Aus)	cA2	1	1	1	0	1	1	1	1	1	nocov	1	1	1	1	1	1	1	0	nocov	0	1	1	nocov	0	0	1	nocov	1	0	0	0	0	0	nocov	nocov	0	1	1	0	nocov	1	nocov	0	nocov	0	1
O. sativa	IRIS_313-11167	XI-2	XI-2	1	1	1	0	1	1	1	1	1	1	1	1	1	1	1	1	1	1	1	1	1	1	1	1	1	1	1	1	1	1	1	1	1	nocov	0	0	nocov	0	1	nocov	1	1	1	1	1	1
O. sativa	IRIS_313-11168	cA(Aus)	cA-adm	1	1	1	0	1	1	1	1	1	1	1	1	1	1	1	1	1	0	1	1	1	1	nocov	0	0	0	nocov	1	1	0	0	0	0	1	nocov	0	nocov	1	1	nocov	1	0	0	1	0	0
O. sativa	IRIS_313-11169	cA(Aus)	cA-adm	1	1	1	0	1	1	1	1	1	0	1	1	1	1	1	1	1	0	1	1	1	1	0	0	0	0	nocov	nocov	1	0	0	0	0	0	nocov	0	0	1	0	nocov	1	1	1	1	0	0
O. sativa	IRIS_313-11170	cA(Aus)	cA-adm	1	1	1	0	1	1	1	1	1	1	1	1	1	1	1	1	1	0	1	1	1	0	nocov	0	0	0	nocov	1	1	1	0	0	0	1	nocov	0	0	1	1	nocov	1	0	0	1	0	0
O. sativa	IRIS_313-11171	cA(Aus)	cA2	1	1	1	0	1	1	1	1	1	0	1	nocov	1	1	1	1	1	0	1	0	1	0	0	0	0	0	nocov	1	1	1	0	0	0	1	nocov	0	0	0	1	nocov	1	1	1	1	0	0
O. sativa	IRIS_313-11172	cA(Aus)	cA1	1	1	1	0	1	1	1	1	1	0	nocov	1	1	0	1	1	1	0	1	1	1	0	0	0	0	0	nocov	1	1	0	0	0	0	nocov	nocov	0	0	nocov	0	nocov	1	1	1	1	0	0
O. sativa	IRIS_313-11173	cA(Aus)	cA-adm	1	1	1	0	1	1	1	1	1	nocov	1	1	1	1	1	1	1	0	1	1	1	1	0	0	0	0	nocov	1	1	0	0	0	1	1	nocov	0	nocov	1	0	nocov	1	1	1	1	0	1
O. sativa	IRIS_313-11174	cA(Aus)	cA1	1	1	1	0	1	1	1	1	1	0	1	1	1	1	1	1	1	0	1	1	1	1	0	0	0	0	nocov	1	1	0	0	0	0	1	0	0	1	nocov	1	nocov	1	1	1	1	0	0
O. sativa	IRIS_313-11175	cA(Aus)	cA1	1	1	1	0	1	1	1	1	1	0	1	nocov	1	0	1	1	1	0	1	1	1	1	0	0	0	0	nocov	1	1	0	0	0	0	1	0	0	1	0	0	nocov	1	1	1	1	0	0
O. sativa	IRIS_313-11176	XI-adm	XI-adm	1	1	1	0	1	1	1	1	1	1	1	1	1	1	1	1	1	1	1	1	1	1	1	1	1	1	nocov	1	1	1	1	1	1	1	nocov	0	1	0	1	1	1	1	1	1	1	1
O. sativa	IRIS_313-11177	XI-adm	XI-3A	1	1	1	0	1	1	1	1	1	1	1	1	1	1	1	1	0	1	1	1	1	1	1	1	1	1	nocov	1	1	1	1	1	1	1	0	0	1	0	1	1	1	0	1	1	1	1
O. sativa	IRIS_313-11178	XI-3	XI-3A	1	1	1	0	1	1	1	1	1	1	1	1	1	1	0	1	0	1	1	1	1	1	1	1	1	0	1	1	1	1	1	0	1	1	nocov	0	1	nocov	1	1	1	1	1	1	1	1
O. sativa	IRIS_313-11179	XI-3	XI-3A	1	1	1	0	1	1	1	1	1	1	1	1	1	1	1	1	0	1	1	1	1	1	1	1	1	1	1	1	1	1	1	0	1	1	nocov	0	1	0	1	nocov	1	0	1	1	1	1
O. sativa	IRIS_313-11180	XI-3	XI-3A	1	1	1	0	1	1	1	1	1	1	1	1	1	1	1	1	0	1	1	1	1	1	1	1	1	1	1	1	1	1	1	0	1	1	1	0	1	0	1	nocov	0	1	1	1	1	1
O. sativa	IRIS_313-11181	XI-3	XI-3A	1	1	1	0	1	nocov	1	1	1	1	1	1	1	1	0	1	0	1	1	1	1	1	1	1	1	1	1	1	1	1	1	0	1	1	0	0	1	0	1	nocov	1	1	1	1	1	1
O. sativa	IRIS_313-11182	XI-3	XI-3A	1	1	1	0	1	1	1	1	1	1	1	1	1	1	1	1	0	1	1	1	1	1	1	1	1	1	1	1	1	1	1	1	1	nocov	1	0	1	0	1	1	1	0	1	1	1	1
O. sativa	IRIS_313-11183	GJ-trp	GJ-trop1	0	0	0	1	0	nocov	0	0	0	1	0	0	1	0	0	0	0	0	nocov	0	0	0	nocov	0	0	1	nocov	1	0	nocov	0	0	0	nocov	0	1	0	1	0	0	0	0	0	0	0	0
O. sativa	IRIS_313-11189	admix	admix	1	1	1	1	0	nocov	0	0	0	0	nocov	1	1	0	1	0	1	0	nocov	0	0	1	0	0	0	1	nocov	1	0	0	0	0	0	nocov	0	0	0	0	0	nocov	nocov	0	0	1	0	0
O. sativa	IRIS_313-11191	cA(Aus)	cA2	1	1	1	0	1	1	0	1	0	0	nocov	0	1	1	1	1	1	0	nocov	0	1	0	0	0	0	0	nocov	nocov	1	0	0	0	0	nocov	0	0	0	0	1	nocov	1	1	0	0	0	0
O. sativa	IRIS_313-11192	XI-3	XI-3B	1	1	1	0	1	1	1	1	1	1	1	1	1	1	1	1	1	1	1	1	1	1	1	1	1	1	1	1	1	1	1	1	0	1	0	0	1	0	1	nocov	1	nocov	1	1	1	1
O. sativa	IRIS_313-11193	XI-3	XI-3B	1	0	1	0	1	1	1	1	1	1	1	1	1	1	1	1	0	1	1	1	1	1	1	1	1	1	1	1	1	1	1	1	0	1	1	0	1	1	1	1	1	nocov	1	1	1	1
O. sativa	IRIS_313-11194	XI-3	XI-3B1	1	1	1	0	1	1	1	1	1	1	1	1	1	1	1	1	0	1	1	1	1	1	1	1	1	1	1	1	1	1	1	0	0	1	nocov	0	1	0	1	nocov	1	1	1	1	1	1
O. sativa	IRIS_313-11195	GJ-sbtrp	GJ-subtrp	1	nocov	0	1	0	nocov	0	0	0	0	0	0	1	0	0	0	0	0	nocov	0	0	0	0	0	0	0	nocov	1	0	nocov	0	0	0	nocov	0	1	0	0	1	nocov	0	0	0	0	1	0
O. sativa	IRIS_313-11196	XI-3	XI-3B2	1	1	1	0	1	1	1	1	1	1	1	1	1	1	1	1	0	1	1	1	1	1	1	1	1	1	1	1	1	1	1	1	0	1	1	0	1	1	1	nocov	1	0	1	1	1	1
O. sativa	IRIS_313-11197	XI-adm	XI-1	1	1	1	0	1	1	1	1	1	1	1	1	1	1	1	1	1	1	1	1	1	1	1	1	1	1	1	1	1	1	1	1	1	1	1	0	1	1	0	1	0	1	1	1	0	1
O. sativa	IRIS_313-11198	GJ-tmp	GJ-temp	0	0	0	1	0	nocov	0	0	0	0	0	0	1	nocov	0	0	0	0	nocov	0	0	0	nocov	0	0	0	nocov	0	1	nocov	0	0	0	nocov	0	1	0	0	0	nocov	0	0	0	0	0	0
O. sativa	IRIS_313-11199	XI-adm	XI-adm	1	0	1	0	1	1	1	1	1	0	1	1	1	1	1	1	1	1	1	1	1	1	1	1	1	1	1	1	1	1	1	1	1	1	1	0	1	1	1	1	1	1	1	1	0	1
O. sativa	IRIS_313-11200	XI-1B	XI-1B	1	1	1	0	1	1	1	1	1	1	1	1	1	1	1	1	1	1	1	1	1	1	1	1	1	1	1	1	1	1	1	1	0	1	nocov	0	1	0	0	1	0	1	1	1	1	1
O. sativa	IRIS_313-11201	GJ-tmp	GJ-temp	0	0	nocov	1	0	nocov	0	0	0	0	0	nocov	1	0	0	0	0	0	nocov	0	0	nocov	0	0	0	0	nocov	nocov	0	nocov	0	0	0	0	0	1	0	0	0	nocov	nocov	0	0	0	0	0
O. sativa	IRIS_313-11202	GJ-tmp	GJ-temp	0	0	0	1	0	nocov	0	0	0	0	0	0	1	0	0	0	0	0	nocov	0	0	0	0	0	0	0	nocov	0	0	nocov	0	0	0	nocov	0	1	0	0	0	0	0	0	0	0	0	0
O. sativa	IRIS_313-11203	XI-2	XI-2A	1	1	1	0	1	1	1	1	1	1	1	1	1	1	1	1	0	1	1	1	1	1	1	1	1	1	1	1	1	1	1	0	1	1	1	0	1	nocov	1	nocov	0	nocov	0	nocov	1	1
O. sativa	IRIS_313-11204	XI-adm	XI-2A	1	1	1	0	1	1	1	1	1	0	1	1	1	1	1	1	1	1	1	1	1	1	0	1	1	1	1	1	1	0	0	1	1	1	nocov	0	0	0	1	nocov	1	nocov	1	1	0	1
O. sativa	IRIS_313-11205	XI-2	XI-2A	1	1	1	0	1	1	1	1	1	1	1	1	1	1	1	1	0	1	1	1	1	1	1	1	1	1	1	1	1	1	0	1	1	1	1	0	1	1	1	1	1	nocov	1	1	1	1
O. sativa	IRIS_313-11206	XI-adm	XI-3	1	1	1	0	1	1	1	1	1	1	1	1	1	1	1	1	0	1	1	1	1	1	1	1	1	1	1	1	1	1	1	1	1	nocov	1	0	1	1	1	nocov	1	0	0	1	1	1
O. sativa	IRIS_313-11207	XI-2	XI-2A	1	0	1	0	1	1	1	1	1	1	1	1	1	1	1	1	0	1	1	1	1	1	nocov	1	1	1	1	1	1	1	1	1	1	1	1	0	1	1	1	nocov	1	nocov	1	1	0	1
O. sativa	IRIS_313-11208	XI-adm	XI-2A	1	0	1	0	1	1	1	1	1	1	1	1	1	1	1	1	0	1	1	1	1	1	1	1	1	1	1	1	1	1	0	1	1	1	1	0	1	0	1	0	1	nocov	1	1	1	1
O. sativa	IRIS_313-11209	XI-2	XI-2	1	0	0	0	1	1	1	1	1	1	1	1	1	1	1	1	1	1	1	1	1	1	0	1	1	1	1	1	1	1	1	1	1	1	0	0	0	1	1	nocov	0	nocov	0	0	1	1
O. sativa	IRIS_313-11210	cA(Aus)	cA1	1	1	1	0	1	1	1	1	1	0	0	1	1	1	1	1	1	0	1	1	1	1	0	0	0	0	nocov	1	1	0	0	nocov	0	1	nocov	0	1	0	1	nocov	1	nocov	1	1	0	0
O. sativa	IRIS_313-11211	XI-2	XI-2A	1	1	1	0	1	1	1	1	1	1	1	1	1	1	1	1	1	1	1	1	1	1	1	1	1	1	nocov	1	1	1	0	1	1	1	1	0	0	0	1	1	1	1	0	1	1	1
O. sativa	IRIS_313-11212	XI-2	XI-2	1	1	1	0	1	1	1	1	1	nocov	1	1	1	1	1	1	1	1	1	1	1	1	1	1	1	1	1	1	1	1	1	1	1	1	0	0	0	0	1	nocov	1	1	1	1	0	1
O. sativa	IRIS_313-11213	cA(Aus)	cA1	1	1	1	0	1	1	1	1	1	nocov	1	nocov	1	1	1	1	1	0	1	1	1	1	0	0	0	0	nocov	1	1	0	0	0	0	nocov	0	0	1	0	1	nocov	1	1	0	1	0	0
O. sativa	IRIS_313-11214	cA(Aus)	cA2	1	1	1	0	1	1	1	1	1	1	1	nocov	1	1	1	1	1	0	1	0	1	0	0	1	0	0	nocov	1	0	0	0	0	1	nocov	nocov	0	0	0	1	nocov	1	1	0	1	0	1
O. sativa	IRIS_313-11216	cA(Aus)	cA2	1	1	1	0	1	1	1	1	1	0	1	0	1	1	1	1	1	0	nocov	1	1	0	0	0	0	0	nocov	1	0	0	0	0	0	nocov	0	0	0	0	1	nocov	1	1	0	1	0	1
O. sativa	IRIS_313-11217	cB(Bas)	cB	0	0	0	0	1	1	0	nocov	0	1	1	0	nocov	1	nocov	0	0	0	nocov	0	0	0	0	0	0	0	nocov	1	0	1	0	0	0	0	nocov	1	1	0	1	nocov	nocov	nocov	0	0	0	0
O. sativa	IRIS_313-11218	cB(Bas)	cB	1	0	1	1	0	nocov	0	0	1	nocov	0	0	nocov	1	1	0	0	0	nocov	0	0	0	0	0	0	0	nocov	1	1	0	0	0	0	nocov	0	1	0	0	0	nocov	nocov	0	0	0	0	0
O. sativa	IRIS_313-11219	XI-2	XI-2A	1	1	1	0	1	1	1	1	1	1	nocov	1	1	1	1	1	1	1	1	1	1	1	1	1	1	1	1	1	1	1	0	1	1	1	1	0	1	1	1	1	1	0	0	1	1	1
O. sativa	IRIS_313-11220	XI-2	XI-2A	1	0	1	0	1	1	1	1	1	1	1	1	1	1	1	1	1	1	1	1	1	1	1	1	1	1	nocov	1	1	1	1	1	1	1	nocov	0	0	1	1	1	1	nocov	0	1	1	1
O. sativa	IRIS_313-11221	XI-2	XI-2A	1	0	1	0	1	1	1	1	1	1	1	1	1	1	1	1	1	1	1	1	1	1	1	1	1	1	1	1	1	1	1	1	1	1	1	0	1	1	1	nocov	1	1	1	1	1	1
O. sativa	IRIS_313-11222	XI-2	XI-2A	1	1	1	0	1	1	1	1	1	1	1	1	1	1	1	1	0	1	1	1	1	1	1	1	1	1	1	1	1	1	0	1	1	1	1	0	1	1	1	1	1	nocov	1	0	1	1
O. sativa	IRIS_313-11223	cB(Bas)	cB	1	1	1	1	1	1	1	1	1	1	1	1	1	0	1	1	0	1	1	1	1	1	1	1	1	1	1	1	1	1	0	1	1	1	1	1	1	1	1	1	1	1	0	0	1	1
O. sativa	IRIS_313-11224	XI-2	XI-2A	1	0	1	0	1	1	1	1	1	1	1	1	1	1	1	1	1	1	1	1	1	1	1	1	1	1	1	1	1	1	1	1	1	1	1	0	0	1	1	0	1	1	1	1	1	1
O. sativa	IRIS_313-11225	XI-adm	XI-2A	1	1	1	0	1	1	1	1	1	1	1	1	1	1	1	1	0	1	1	1	1	1	1	1	1	0	1	1	1	1	0	1	1	1	1	0	1	0	1	nocov	1	nocov	1	1	1	1
O. sativa	IRIS_313-11226	XI-2	XI-2A	1	0	1	0	1	1	1	1	1	1	1	1	1	1	1	1	1	1	1	1	1	1	1	1	1	1	1	1	1	1	0	1	1	1	1	0	1	1	1	nocov	1	1	1	1	1	1
O. sativa	IRIS_313-11227	XI-2	XI-2A	1	0	1	0	1	1	1	1	1	1	1	1	1	1	nocov	1	1	1	1	1	1	1	1	1	1	1	1	1	1	1	0	1	1	1	1	0	1	1	1	0	1	1	0	1	1	1
O. sativa	IRIS_313-11228	XI-2	XI-2A	1	0	1	0	1	1	1	1	1	1	1	1	1	1	1	1	1	1	1	1	1	1	1	1	1	1	1	1	1	1	0	1	1	1	1	0	1	1	1	1	1	1	1	1	1	1
O. sativa	IRIS_313-11229	XI-2	XI-2A	1	1	1	0	1	1	1	1	1	1	1	1	1	1	1	1	0	1	1	1	1	1	1	1	1	1	1	1	1	1	0	1	1	1	1	0	1	1	1	1	1	nocov	0	0	1	1
O. sativa	IRIS_313-11230	XI-2	XI-2A	1	0	1	0	1	1	1	1	1	1	1	1	1	1	nocov	1	1	1	1	1	1	1	1	1	1	1	1	1	1	1	0	1	1	1	1	0	1	1	1	nocov	1	1	0	1	1	1
O. sativa	IRIS_313-11231	XI-2	XI-2A	1	0	1	0	1	1	1	1	1	1	1	1	1	1	1	1	0	1	1	1	1	1	1	1	1	1	1	1	1	1	1	1	1	1	1	0	1	1	1	nocov	1	1	0	1	1	1
O. sativa	IRIS_313-11232	cA(Aus)	cA1	1	1	1	0	1	1	1	1	0	1	0	1	1	0	1	1	1	0	1	1	1	1	0	0	0	0	1	1	1	0	1	0	0	1	nocov	1	1	0	1	nocov	1	1	1	1	1	0
O. sativa	IRIS_313-11233	XI-1B	XI-1B2	1	1	1	0	1	1	1	1	1	1	1	1	1	1	1	1	1	1	1	1	1	1	1	1	1	1	1	1	1	1	1	1	1	1	1	0	0	1	1	1	1	1	1	1	1	1
O. sativa	IRIS_313-11234	XI-adm	XI-adm	1	1	1	1	1	1	1	1	1	1	1	1	1	1	1	1	1	1	1	1	1	1	1	1	1	1	1	1	1	1	1	1	1	1	1	0	0	0	1	1	1	1	1	0	1	1
O. sativa	IRIS_313-11235	XI-adm	XI-2	1	0	1	0	1	1	1	1	1	1	1	1	1	1	1	1	1	1	1	1	1	1	1	1	1	1	1	1	1	1	1	1	0	1	1	0	1	1	1	nocov	1	1	1	1	1	1
O. sativa	IRIS_313-11236	XI-3	XI-3B1	1	0	1	0	1	1	1	1	1	1	1	1	1	1	1	1	0	1	1	1	1	1	1	1	1	1	1	1	1	1	1	0	1	1	nocov	0	1	0	1	1	1	0	1	0	1	1
O. sativa	IRIS_313-11237	XI-1B	XI-1B	1	1	1	0	1	1	1	1	1	1	1	1	1	1	1	1	1	1	1	0	1	1	1	1	1	1	1	1	1	1	1	1	1	1	1	0	0	1	1	1	1	1	1	1	1	1
O. sativa	IRIS_313-11238	GJ-trp	GJ-trop1	0	0	0	1	0	nocov	0	0	0	0	0	0	1	0	0	0	1	0	0	0	0	0	0	0	0	0	nocov	1	1	nocov	0	0	0	nocov	0	1	0	0	0	nocov	0	0	1	0	0	0
O. sativa	IRIS_313-11239	XI-adm	XI-adm	1	1	1	1	1	1	1	1	1	1	1	1	1	1	1	1	0	1	1	1	1	1	1	1	1	1	1	1	1	1	1	1	1	1	1	0	1	0	1	nocov	1	1	1	1	1	1
O. sativa	IRIS_313-11240	XI-adm	XI-adm	1	1	1	0	1	1	1	1	0	1	1	1	1	1	1	1	1	1	1	1	0	1	1	1	1	1	1	nocov	1	1	0	1	1	1	1	0	1	0	0	1	1	1	1	1	1	1
O. sativa	IRIS_313-11241	XI-2	XI-2	1	0	1	0	1	1	1	1	1	1	1	1	1	1	1	1	0	1	1	1	1	1	1	1	1	1	1	1	1	1	1	0	0	1	0	0	1	1	1	nocov	0	nocov	1	1	1	1
O. sativa	IRIS_313-11242	XI-2	XI-2	1	0	1	0	1	1	1	1	1	1	1	1	1	1	1	1	1	1	1	1	1	1	1	1	1	1	1	1	1	1	1	1	1	0	1	0	1	1	1	1	1	1	1	1	1	1
O. sativa	IRIS_313-11243	admix	admix	1	1	1	0	1	1	1	1	1	0	1	1	1	0	1	1	1	1	1	0	1	1	nocov	1	0	1	1	1	1	0	1	1	1	1	0	0	1	0	1	0	1	nocov	1	1	0	1
O. sativa	IRIS_313-11244	XI-adm	XI-1	1	1	1	0	1	1	1	1	1	1	1	1	1	1	1	1	1	1	1	1	1	1	1	1	1	1	1	1	1	1	0	1	1	1	1	0	1	0	1	1	0	1	1	1	0	1
O. sativa	IRIS_313-11245	XI-adm	XI-1	1	1	0	0	1	1	1	1	1	1	1	1	1	1	1	1	1	1	1	1	1	1	1	1	1	1	1	1	1	1	1	1	1	1	1	0	1	0	1	1	1	1	1	1	1	1
O. sativa	IRIS_313-11246	GJ-tmp	GJ-temp	0	0	0	1	0	1	0	0	1	1	0	0	1	0	0	0	0	0	nocov	0	0	0	0	0	0	0	nocov	0	0	nocov	0	0	0	0	0	1	0	0	0	0	1	0	0	0	0	0
O. sativa	IRIS_313-11247	XI-adm	XI-1	1	1	1	0	1	1	1	1	0	1	1	1	1	1	1	1	1	1	1	1	1	1	1	1	1	1	1	1	1	1	1	1	1	1	1	0	0	1	1	1	1	1	1	1	1	1
O. sativa	IRIS_313-11248	GJ-trp	GJ-trop1	0	0	1	1	0	nocov	0	0	0	0	0	0	1	0	0	0	0	0	nocov	0	0	0	0	0	0	0	nocov	1	0	nocov	0	0	0	nocov	0	1	0	0	0	nocov	1	0	1	0	0	0
O. sativa	IRIS_313-11249	XI-adm	XI-adm	1	1	1	0	1	1	1	1	1	0	1	1	1	1	1	1	1	1	1	1	1	1	1	1	1	1	1	1	1	1	1	1	1	1	1	0	1	1	1	1	1	nocov	1	1	1	1
O. sativa	IRIS_313-11250	XI-1B	XI-1	1	1	1	0	1	1	1	1	1	1	1	1	1	1	1	1	1	1	1	1	1	1	1	1	1	1	1	1	1	1	1	1	1	1	1	0	0	0	1	1	1	1	1	1	1	1
O. sativa	IRIS_313-11251	XI-1B	XI-1B	1	1	1	0	1	1	1	1	1	0	1	1	1	1	1	1	1	1	1	1	1	1	1	1	1	1	1	1	1	1	1	1	0	1	1	0	1	0	1	1	1	1	1	1	1	1
O. sativa	IRIS_313-11252	XI-adm	XI-adm	1	1	1	0	1	1	0	1	1	1	1	1	1	1	1	1	1	0	1	0	1	1	1	1	1	1	1	1	1	1	1	0	1	nocov	0	0	1	1	1	nocov	1	nocov	1	1	1	1
O. sativa	IRIS_313-11253	XI-adm	XI-adm	1	1	1	0	1	1	1	1	1	0	1	1	1	1	1	1	1	0	1	1	1	1	1	1	1	1	1	1	1	nocov	1	1	0	1	1	0	1	0	1	nocov	1	1	1	1	1	1
O. sativa	IRIS_313-11254	XI-3	XI-3B1	1	1	1	0	1	1	1	1	1	1	1	1	1	1	1	1	0	1	1	1	1	1	1	1	1	1	1	1	1	1	1	0	0	1	nocov	0	1	0	1	nocov	1	0	0	1	1	1
O. sativa	IRIS_313-11255	XI-adm	XI-adm	1	1	1	0	1	1	1	1	1	nocov	1	1	1	1	1	1	1	1	1	1	1	1	1	1	1	1	1	1	1	1	0	1	1	1	nocov	0	0	1	1	nocov	1	1	0	1	1	1
O. sativa	IRIS_313-11256	XI-adm	XI-2A	1	1	1	0	1	1	1	1	1	0	1	0	1	1	1	1	1	1	1	1	1	1	1	1	0	1	1	1	1	1	1	1	1	1	1	0	1	0	1	1	1	0	1	1	1	1
O. sativa	IRIS_313-11257	XI-adm	XI-adm	1	1	1	0	1	1	1	1	1	1	1	1	1	1	1	1	1	1	1	1	1	1	1	1	0	1	1	1	1	1	1	1	1	1	1	0	1	1	1	1	1	1	1	1	1	1
O. sativa	IRIS_313-11258	cB(Bas)	cB	1	0	1	1	0	1	0	0	0	0	0	1	1	1	1	0	0	0	nocov	0	0	0	0	0	0	0	nocov	1	1	0	0	0	0	nocov	nocov	0	0	0	1	1	0	0	0	0	0	0
O. sativa	IRIS_313-11259	cB(Bas)	cB	0	nocov	0	1	0	nocov	nocov	0	0	nocov	nocov	nocov	nocov	nocov	1	0	0	1	nocov	0	0	0	0	0	0	0	nocov	1	0	nocov	nocov	0	0	nocov	0	0	0	nocov	1	nocov	nocov	1	0	0	0	0
O. sativa	IRIS_313-11260	XI-adm	XI-adm	1	1	1	0	1	1	1	1	1	1	1	1	1	1	1	1	1	1	1	1	1	1	1	1	1	1	1	1	1	1	1	1	1	1	1	0	1	1	1	1	1	1	1	1	1	1
O. sativa	IRIS_313-11261	XI-adm	XI-adm	1	1	1	0	1	1	1	1	1	1	1	1	1	1	1	1	0	1	1	1	1	1	1	1	1	1	1	1	1	1	1	1	1	nocov	1	0	1	1	1	1	0	0	1	1	1	1
O. sativa	IRIS_313-11262	XI-adm	XI-2A	1	0	1	0	1	1	1	1	1	nocov	1	1	1	1	1	1	1	1	1	1	1	1	1	1	1	1	1	1	1	1	1	1	1	1	1	0	0	0	1	1	1	0	1	1	1	1
O. sativa	IRIS_313-11263	XI-adm	XI-adm	0	1	1	0	1	1	1	1	1	1	1	0	1	1	1	1	0	1	1	0	1	1	1	1	1	0	nocov	1	1	1	1	1	1	nocov	0	1	1	0	1	1	1	1	1	1	0	1
O. sativa	IRIS_313-11264	XI-adm	XI-adm	1	1	1	0	1	1	1	1	1	1	1	1	1	1	1	1	1	1	1	1	1	1	1	1	1	1	1	1	1	1	1	1	1	nocov	1	0	1	1	1	1	1	0	1	0	1	1
O. sativa	IRIS_313-11265	cA(Aus)	cA1	1	1	1	0	1	1	1	1	1	0	1	1	1	1	1	1	1	0	1	1	1	1	0	0	0	0	nocov	1	1	0	0	0	0	0	0	0	nocov	0	1	nocov	1	1	0	1	1	0
O. sativa	IRIS_313-11266	XI-adm	XI-adm	1	1	1	0	1	1	1	1	1	1	1	0	1	1	1	1	1	1	1	1	1	1	1	1	1	1	1	1	1	1	1	1	1	1	1	0	1	1	1	1	1	0	1	1	1	1
O. sativa	IRIS_313-11267	XI-2	XI-2A	1	0	1	0	1	1	1	1	1	1	1	1	1	1	1	1	1	1	1	1	1	1	1	1	1	1	1	1	1	1	1	1	0	1	1	0	1	0	0	nocov	1	0	1	1	1	1
O. sativa	IRIS_313-11268	cB(Bas)	cB	nocov	0	0	1	0	nocov	nocov	0	0	0	0	0	nocov	1	1	0	0	1	nocov	0	0	0	0	0	0	0	nocov	1	1	0	0	0	0	nocov	0	0	0	0	0	0	nocov	1	0	0	0	0
O. sativa	IRIS_313-11269	XI-adm	XI-adm	1	1	1	1	1	1	1	1	1	1	1	1	1	1	1	1	1	1	1	1	1	1	0	1	1	1	1	1	1	1	1	1	1	1	1	0	1	1	1	1	1	1	1	1	1	1
O. sativa	IRIS_313-11270	cB(Bas)	cB	1	1	1	1	1	1	1	1	1	1	1	1	1	1	1	1	1	1	1	1	1	1	0	1	0	1	nocov	1	1	1	1	1	1	1	1	0	0	0	1	1	1	1	1	1	1	1
O. sativa	IRIS_313-11271	XI-2	XI-2	1	1	1	0	1	1	1	1	1	1	1	1	1	1	1	1	0	1	1	1	1	1	1	1	1	1	1	1	1	1	1	1	1	1	1	0	1	1	0	nocov	1	nocov	1	0	1	1
O. sativa	IRIS_313-11272	cA(Aus)	cA2	1	1	1	0	1	1	1	1	1	nocov	1	1	1	1	1	1	1	0	nocov	nocov	1	1	0	0	0	0	nocov	1	0	1	0	0	1	nocov	0	0	1	0	1	nocov	1	1	0	1	0	1
O. sativa	IRIS_313-11273	XI-adm	XI-2A	1	1	1	0	1	1	1	1	1	0	1	1	1	1	1	1	1	1	1	1	1	1	1	1	0	1	1	1	1	1	1	1	1	1	1	0	0	0	1	1	1	0	1	1	1	1
O. sativa	IRIS_313-11274	cA(Aus)	cA-adm	1	1	1	0	1	1	1	1	1	0	1	1	1	1	1	1	1	1	1	1	1	1	0	0	0	0	nocov	1	1	1	0	0	1	nocov	1	1	1	0	1	1	1	1	1	1	1	1
O. sativa	IRIS_313-11275	XI-adm	XI-adm	1	1	1	0	1	1	1	1	1	1	1	nocov	1	1	1	1	0	1	1	1	1	1	nocov	1	1	1	1	1	1	1	1	0	0	nocov	0	0	0	1	1	nocov	1	1	1	1	0	1
O. sativa	IRIS_313-11276	XI-adm	XI-adm	1	1	1	1	1	1	1	1	1	1	1	1	1	1	1	1	1	1	1	1	1	1	0	1	1	1	1	1	1	1	1	1	1	nocov	1	0	1	1	1	1	1	1	0	1	1	1
O. sativa	IRIS_313-11277	cA(Aus)	cA2	1	1	1	0	1	1	1	1	1	1	1	1	1	1	1	1	1	0	nocov	0	1	0	0	0	0	0	nocov	1	0	0	0	0	0	0	nocov	0	0	0	1	nocov	1	nocov	0	1	0	1
O. sativa	IRIS_313-11278	XI-adm	XI-adm	1	1	1	0	1	1	1	1	1	1	1	1	1	1	1	1	1	1	1	1	1	1	1	1	1	1	1	1	1	1	1	1	1	nocov	1	0	1	1	1	nocov	1	1	1	1	0	1
O. sativa	IRIS_313-11279	XI-adm	XI-adm	1	1	1	0	1	1	1	1	1	1	1	1	1	1	1	1	1	1	1	1	1	1	1	1	1	1	1	1	1	0	1	0	1	nocov	1	0	1	1	1	1	1	nocov	1	1	1	1
O. sativa	IRIS_313-11280	XI-adm	XI-adm	1	1	1	0	1	1	1	1	1	1	1	1	1	1	1	1	0	1	1	1	1	1	1	1	1	1	1	1	1	1	1	1	1	1	1	0	0	0	1	1	1	1	1	1	1	1
O. sativa	IRIS_313-11281	XI-1A	XI-1A	1	1	1	0	1	1	1	1	0	1	1	1	1	1	1	1	1	1	1	1	1	1	1	1	1	1	1	1	1	1	1	1	0	1	1	0	0	1	1	nocov	1	1	1	1	1	1
O. sativa	IRIS_313-11282	XI-2	XI-2	1	1	1	0	1	1	1	1	1	1	1	1	1	1	1	1	1	1	1	1	1	1	1	1	1	1	nocov	1	1	1	0	1	1	1	0	0	1	1	1	1	1	1	1	1	1	1
O. sativa	IRIS_313-11283	XI-adm	XI-adm	1	0	1	0	0	1	1	1	1	1	1	1	1	1	1	1	0	1	1	1	1	1	1	1	1	0	nocov	1	1	1	1	1	1	1	1	0	0	1	1	nocov	1	1	1	1	1	1
O. sativa	IRIS_313-11284	XI-adm	XI-2A	1	nocov	1	0	1	1	1	1	1	1	1	1	1	1	1	1	0	1	1	1	1	1	1	1	1	1	1	1	1	1	1	1	1	1	1	0	0	1	1	nocov	1	nocov	1	1	1	1
O. sativa	IRIS_313-11285	XI-2	XI-2	1	0	1	0	1	1	1	1	1	1	1	1	1	1	1	1	1	1	1	1	1	1	1	1	1	1	1	1	1	1	1	1	1	1	0	0	0	1	1	nocov	1	1	1	0	0	1
O. sativa	IRIS_313-11286	XI-adm	XI-adm	1	1	1	1	1	1	0	1	1	1	1	nocov	1	1	0	1	1	1	nocov	1	1	1	1	1	1	1	1	1	1	1	1	0	0	nocov	1	0	1	1	1	nocov	0	0	1	1	1	1
O. sativa	IRIS_313-11287	XI-adm	XI-adm	1	1	1	0	1	1	1	1	1	1	1	1	1	1	1	1	1	1	1	1	1	1	1	1	1	1	1	1	1	1	1	1	1	nocov	1	0	1	1	1	1	1	0	1	1	1	1
O. sativa	IRIS_313-11288	XI-adm	XI-adm	1	1	1	0	1	1	1	1	1	1	1	1	1	1	1	1	0	1	1	1	1	1	1	1	1	1	1	1	1	1	1	1	1	1	1	0	nocov	1	1	1	nocov	0	1	1	1	1
O. sativa	IRIS_313-11289	cB(Bas)	cB	1	0	0	1	0	nocov	0	0	0	0	0	nocov	nocov	1	1	0	0	1	nocov	0	0	0	0	0	0	0	nocov	1	0	0	0	0	0	nocov	0	0	0	0	1	nocov	nocov	1	0	1	0	0
O. sativa	IRIS_313-11290	admix	admix	1	0	1	1	1	1	1	1	1	1	1	1	1	1	1	1	0	1	1	1	1	1	1	1	1	1	1	1	1	1	1	0	1	1	0	0	0	1	1	nocov	1	1	1	1	1	1
O. sativa	IRIS_313-11291	cA(Aus)	cA1	1	1	1	0	1	1	1	1	1	0	1	nocov	1	1	1	1	1	0	1	1	1	1	0	1	0	0	nocov	1	1	0	0	0	0	1	0	0	1	0	0	nocov	1	1	1	1	0	0
O. sativa	IRIS_313-11292	XI-adm	XI-2A	1	1	1	0	1	1	1	1	1	1	1	1	1	1	1	1	0	1	1	1	1	1	1	1	1	1	1	1	1	1	1	0	1	1	1	0	1	0	1	1	0	nocov	1	1	1	1
O. sativa	IRIS_313-11293	cB(Bas)	cB	1	0	1	1	0	nocov	nocov	0	0	0	0	0	nocov	1	1	0	0	1	nocov	0	0	0	0	0	0	0	nocov	1	0	0	0	0	0	nocov	0	0	0	nocov	1	nocov	0	1	0	1	0	0
O. sativa	IRIS_313-11294	XI-2	XI-2A	1	1	1	0	1	1	1	1	1	1	1	1	1	1	1	1	0	1	1	1	1	1	1	1	1	1	1	1	1	1	1	1	1	0	1	0	1	0	0	1	nocov	nocov	1	1	0	1
O. sativa	IRIS_313-11295	admix	admix	0	1	1	1	1	nocov	1	1	0	0	1	1	1	1	0	1	1	1	1	1	1	1	1	0	1	0	nocov	1	1	nocov	0	0	0	nocov	nocov	0	0	0	1	0	1	1	0	0	0	1
O. sativa	IRIS_313-11296	XI-adm	XI-adm	1	1	1	0	1	1	1	1	1	1	1	1	1	1	1	1	1	1	1	nocov	1	1	nocov	1	1	1	nocov	1	1	1	1	1	1	1	1	0	1	1	1	1	1	1	1	1	1	1
O. sativa	IRIS_313-11297	admix	admix	1	0	0	1	0	nocov	0	0	0	0	0	0	nocov	0	1	0	0	0	nocov	0	0	0	0	0	0	0	nocov	nocov	0	0	0	0	0	nocov	0	0	0	0	0	nocov	0	1	0	0	0	0
O. sativa	IRIS_313-11298	cA(Aus)	cA1	1	1	1	0	1	1	1	1	1	0	0	1	1	1	1	1	1	0	1	1	0	1	0	0	0	0	nocov	nocov	1	0	0	0	0	1	nocov	0	nocov	0	0	nocov	1	1	0	1	0	0
O. sativa	IRIS_313-11299	XI-adm	XI-adm	1	1	1	0	1	1	1	1	1	1	1	1	1	1	1	1	0	1	1	1	1	1	1	1	1	0	1	1	1	1	1	1	1	1	1	0	1	1	1	1	0	0	0	0	1	1
O. sativa	IRIS_313-11300	XI-2	XI-2	1	0	0	0	1	1	1	1	1	1	1	1	1	1	1	1	1	1	1	1	1	1	0	1	1	1	1	1	1	1	0	1	1	1	1	0	1	1	1	nocov	1	nocov	1	0	1	1
O. sativa	IRIS_313-11301	XI-2	XI-2A	1	1	1	0	1	1	1	1	1	1	1	1	1	1	1	1	0	1	1	1	1	1	1	1	1	1	1	1	1	1	1	1	1	0	nocov	0	1	0	0	1	0	nocov	1	1	1	1
O. sativa	IRIS_313-11302	XI-adm	admix	1	1	1	0	1	1	1	1	1	1	1	1	1	1	1	1	1	1	1	0	1	1	1	0	1	0	1	1	1	1	0	0	1	0	1	1	1	1	1	1	1	1	1	1	0	1
O. sativa	IRIS_313-11303	XI-adm	XI-adm	1	1	1	0	1	1	1	1	1	1	1	1	1	1	1	1	1	1	1	1	1	1	1	1	1	0	1	1	1	1	1	1	1	nocov	1	1	1	1	1	1	1	1	1	1	1	1
O. sativa	IRIS_313-11304	XI-adm	XI-adm	1	1	1	0	1	1	1	1	1	1	1	1	1	1	1	1	1	1	1	1	1	1	1	1	1	1	1	1	1	1	1	1	1	nocov	1	0	1	1	1	1	1	1	0	1	1	1
O. sativa	IRIS_313-11305	XI-adm	XI-2A	1	1	1	0	0	1	1	1	1	nocov	1	1	1	nocov	1	1	0	0	1	1	1	0	1	1	0	1	1	1	0	1	1	1	0	1	0	0	1	1	1	1	1	1	0	nocov	1	1
O. sativa	IRIS_313-11306	XI-adm	XI-adm	1	1	1	0	1	1	1	1	1	1	1	1	1	1	1	1	1	1	1	1	1	1	0	1	1	1	1	1	1	1	1	1	0	1	nocov	0	1	1	1	1	1	1	0	1	1	1
O. sativa	IRIS_313-11307	XI-adm	XI-2A	1	1	1	0	1	1	1	1	1	1	1	0	1	nocov	1	1	1	1	1	1	1	1	0	1	1	1	1	1	1	1	1	1	1	1	1	0	1	1	1	1	1	nocov	0	0	1	1
O. sativa	IRIS_313-11308	XI-2	XI-2A	1	1	1	0	1	1	1	1	1	1	1	1	1	nocov	1	1	1	1	1	1	1	1	1	1	1	1	1	1	1	1	1	1	1	0	1	0	1	0	1	1	1	0	1	1	1	1
O. sativa	IRIS_313-11309	XI-adm	XI-adm	1	1	1	0	1	1	1	1	1	1	1	1	1	1	1	1	1	1	1	1	1	1	1	1	1	1	1	1	1	1	1	1	0	1	1	0	1	0	1	1	1	1	0	1	1	1
O. sativa	IRIS_313-11310	XI-2	XI-2	1	1	1	0	1	1	1	1	1	1	1	0	1	1	1	1	1	1	1	1	1	1	1	1	1	1	1	1	1	1	1	0	1	1	1	0	0	1	0	nocov	1	1	1	1	1	1
O. sativa	IRIS_313-11311	GJ-trp	GJ-trop2	0	0	0	1	0	nocov	0	0	0	0	0	0	nocov	0	0	0	0	0	nocov	0	0	0	0	0	0	0	nocov	nocov	0	nocov	0	0	0	nocov	0	1	0	0	0	1	0	0	0	0	0	0
O. sativa	IRIS_313-11312	XI-3	XI-3A	1	0	1	0	1	1	1	1	1	1	1	1	1	1	0	1	0	1	1	1	1	1	1	1	1	0	1	1	1	1	1	1	0	1	1	0	1	0	1	nocov	1	1	1	1	1	1
O. sativa	IRIS_313-11313	GJ-trp	GJ-trop1	nocov	0	1	1	0	nocov	0	0	0	1	0	1	1	0	0	0	0	0	nocov	1	0	0	0	0	0	0	0	1	0	nocov	0	0	0	nocov	0	1	0	1	0	nocov	1	0	1	1	0	0
O. sativa	IRIS_313-11314	GJ-trp	GJ-trop1	0	0	1	1	0	1	0	0	0	0	0	0	1	0	0	0	0	0	nocov	0	0	0	0	0	0	0	nocov	1	0	nocov	0	nocov	nocov	nocov	0	1	0	1	0	0	0	0	1	0	0	0
O. sativa	IRIS_313-11315	XI-3	XI-3A	1	1	1	0	1	1	1	1	1	1	1	1	1	nocov	1	1	0	1	1	1	1	1	1	1	1	1	1	1	1	1	1	0	1	1	1	0	1	0	1	1	1	1	1	1	1	1
O. sativa	IRIS_313-11316	XI-3	XI-3A	1	0	1	0	1	1	1	1	1	1	1	1	1	1	0	1	0	1	1	1	1	1	1	1	1	0	1	1	1	1	1	1	0	1	1	0	1	0	1	nocov	1	1	1	1	1	1
O. sativa	IRIS_313-11317	XI-3	XI-3A	1	0	1	0	1	1	1	1	1	1	1	1	1	1	1	1	0	1	1	1	1	1	1	1	1	1	1	1	1	1	1	1	1	1	0	0	1	0	1	nocov	1	1	1	1	1	1
O. sativa	IRIS_313-11318	XI-3	XI-3A	1	1	1	0	1	1	1	1	1	1	1	1	1	1	1	1	0	1	1	1	1	1	1	1	1	1	1	1	1	1	1	0	1	1	0	0	1	0	1	nocov	1	0	1	1	1	1
O. sativa	IRIS_313-11319	XI-3	XI-3A	1	0	1	0	1	nocov	1	1	1	1	1	1	1	nocov	0	1	0	1	1	1	1	1	1	1	1	1	1	1	1	1	1	1	0	1	nocov	0	1	nocov	1	nocov	1	0	1	1	1	1
O. sativa	IRIS_313-11320	XI-3	XI-3A	1	0	1	0	1	1	1	1	1	1	1	1	1	nocov	0	1	0	1	1	1	1	1	1	1	1	1	1	1	1	1	1	1	0	1	0	0	1	0	1	1	1	0	1	1	1	1
O. sativa	IRIS_313-11321	XI-2	XI-2A	1	1	1	0	1	1	1	1	1	1	1	1	1	1	1	1	1	1	1	1	1	1	1	1	1	1	1	1	1	1	1	1	1	1	1	0	1	0	0	1	1	nocov	1	1	1	1
O. sativa	IRIS_313-11322	cA(Aus)	cA1	1	1	1	0	1	1	1	1	1	nocov	1	1	1	1	1	1	1	0	1	1	1	1	0	1	0	0	nocov	1	1	0	0	0	0	nocov	nocov	0	0	0	0	nocov	1	1	0	1	0	0
O. sativa	IRIS_313-11323	cA(Aus)	cA2	1	1	1	0	1	1	1	1	0	0	1	1	1	1	1	1	1	0	nocov	1	1	1	0	0	0	0	nocov	1	1	0	0	0	0	nocov	nocov	0	1	0	1	nocov	1	1	0	1	0	1
O. sativa	IRIS_313-11324	cA(Aus)	cA1	1	1	1	0	1	1	1	1	1	0	1	1	1	1	1	1	1	0	1	1	1	1	0	1	0	0	nocov	1	1	0	0	1	0	1	0	0	1	0	1	nocov	1	1	1	1	0	0
O. sativa	IRIS_313-11325	XI-adm	XI-1B1	1	1	1	0	1	1	1	1	1	1	1	1	1	1	1	1	1	1	1	1	1	1	1	1	1	1	1	1	1	1	1	1	1	1	1	0	0	1	1	1	nocov	1	1	1	1	1
O. sativa	IRIS_313-11326	XI-adm	XI-adm	1	1	1	0	1	1	1	1	1	0	1	1	1	1	1	1	1	1	1	1	1	1	1	1	1	1	1	1	1	1	1	1	0	1	1	0	1	nocov	0	1	0	1	1	1	1	1
O. sativa	IRIS_313-11327	XI-3	XI-3B1	1	1	1	0	1	1	1	1	1	1	1	1	1	1	1	1	0	1	1	1	1	1	1	1	1	1	1	1	1	1	1	1	0	nocov	1	0	1	1	1	nocov	1	0	1	1	1	1
O. sativa	IRIS_313-11328	GJ-trp	GJ-trop1	0	0	1	1	0	1	0	0	0	1	0	0	1	0	0	0	0	0	nocov	0	0	0	0	0	0	0	1	1	0	nocov	0	0	0	nocov	0	1	0	1	0	nocov	1	0	1	0	0	0
O. sativa	IRIS_313-11329	GJ-trp	GJ-trop1	nocov	1	1	1	0	1	0	0	0	1	0	0	1	0	0	0	0	0	nocov	0	0	0	0	0	0	1	1	1	0	nocov	0	0	0	nocov	0	1	0	1	0	nocov	1	0	0	0	0	0
O. sativa	IRIS_313-11330	XI-3	XI-3B	1	1	1	0	1	1	1	1	1	1	1	1	1	1	1	1	0	1	1	1	1	1	1	1	1	1	1	1	1	1	1	1	0	1	1	0	1	1	1	nocov	1	1	0	1	1	1
O. sativa	IRIS_313-11331	XI-3	XI-3B1	1	1	1	0	1	1	0	1	1	1	1	1	1	1	1	1	0	1	1	1	1	1	1	1	1	1	1	1	1	1	1	1	0	1	1	0	1	0	1	1	1	1	1	0	1	1
O. sativa	IRIS_313-11334	XI-3	XI-3B	1	1	1	0	1	1	1	1	1	1	1	1	1	1	1	1	0	1	1	1	1	1	1	1	1	1	1	1	1	1	1	1	0	1	nocov	0	1	0	1	1	1	1	1	0	0	1
O. sativa	IRIS_313-11335	XI-2	XI-2B	1	1	1	0	1	1	1	1	0	1	1	1	1	1	1	1	1	1	1	1	1	0	0	1	1	1	1	1	1	1	0	1	1	1	0	0	nocov	1	1	1	1	1	1	0	1	1
O. sativa	IRIS_313-11336	GJ-tmp	GJ-temp	0	0	0	1	0	nocov	0	0	0	0	nocov	0	nocov	nocov	0	1	0	0	nocov	0	0	0	0	0	0	0	0	nocov	1	nocov	0	0	0	nocov	0	1	0	0	0	nocov	nocov	0	0	0	0	0
O. sativa	IRIS_313-11337	GJ-trp	GJ-trop1	0	0	0	1	0	1	0	0	0	1	0	0	1	nocov	0	0	0	0	nocov	0	0	0	0	0	0	1	nocov	1	0	nocov	0	0	0	nocov	0	1	0	0	0	nocov	1	0	1	0	0	0
O. sativa	IRIS_313-11338	XI-adm	XI-3B2	1	1	1	0	1	1	1	1	1	1	1	1	1	1	1	1	0	1	1	1	1	1	1	1	1	1	1	1	1	1	1	1	0	1	1	0	1	1	1	nocov	1	1	1	1	1	1
O. sativa	IRIS_313-11339	XI-2	XI-2A	1	1	1	0	1	1	1	1	1	1	1	1	1	1	1	1	1	1	1	1	1	1	1	1	1	1	1	1	1	1	1	1	1	nocov	1	0	1	0	1	nocov	1	1	1	1	0	1
O. sativa	IRIS_313-11340	GJ-trp	GJ-trop1	0	1	0	1	0	nocov	0	0	0	1	0	0	1	nocov	0	0	0	0	nocov	0	0	0	0	0	0	1	nocov	1	0	nocov	0	0	0	nocov	0	1	0	0	0	0	1	0	0	0	0	0
O. sativa	IRIS_313-11341	XI-3	XI-3B1	1	0	1	0	1	1	1	1	1	1	1	1	1	1	1	1	0	1	1	1	1	1	1	1	1	1	1	1	1	1	1	1	0	nocov	1	0	1	1	1	nocov	1	nocov	1	1	1	1
O. sativa	IRIS_313-11342	XI-adm	XI-3	1	1	1	0	1	1	1	1	1	1	1	0	1	1	1	1	0	0	1	1	1	1	0	1	1	1	1	1	1	1	1	1	1	nocov	0	1	1	1	1	0	1	1	1	0	1	1
O. sativa	IRIS_313-11343	XI-3	XI-3B1	1	1	1	0	1	1	1	1	1	1	1	1	1	1	1	1	0	1	1	1	1	1	1	1	1	1	1	1	1	1	1	1	0	nocov	1	0	1	1	1	nocov	1	nocov	0	1	1	1
O. sativa	IRIS_313-11344	XI-3	XI-3	1	1	1	0	1	1	1	1	1	1	1	1	1	1	1	1	0	1	1	1	1	1	1	1	1	1	nocov	1	1	1	1	0	0	0	1	0	0	1	1	1	1	nocov	1	1	0	1
O. sativa	IRIS_313-11345	XI-adm	XI-3B2	1	1	1	0	1	1	1	1	1	1	1	1	1	1	1	1	0	1	1	1	1	1	1	1	1	0	1	1	1	1	1	1	0	1	1	0	1	1	1	nocov	1	1	1	1	1	1
O. sativa	IRIS_313-11346	XI-1B	XI-1B	1	1	1	0	1	1	1	1	1	1	1	1	1	1	1	1	1	1	1	1	1	1	1	1	1	1	1	1	1	1	1	1	1	1	1	0	1	0	0	1	nocov	1	1	1	1	1
O. sativa	IRIS_313-11347	XI-adm	XI-3B2	1	1	1	0	1	1	1	1	1	1	1	1	1	1	1	1	0	1	1	1	1	1	1	1	1	0	nocov	1	1	1	1	1	0	1	1	0	1	1	1	nocov	1	1	1	1	1	1
O. sativa	IRIS_313-11348	cA(Aus)	cA2	1	1	1	0	1	1	1	1	1	nocov	1	nocov	1	1	1	1	1	0	nocov	1	1	0	0	0	0	0	nocov	1	0	0	0	1	1	nocov	nocov	1	nocov	1	1	nocov	1	1	0	1	0	0
O. sativa	IRIS_313-11349	XI-2	XI-2A	1	1	1	0	1	1	1	1	1	1	1	1	1	1	1	1	1	1	1	1	1	1	1	1	1	1	1	1	1	1	1	1	1	1	1	0	1	1	1	1	1	1	1	1	0	1
O. sativa	IRIS_313-11350	cB(Bas)	cB	1	0	1	1	0	1	0	0	0	0	nocov	0	1	1	1	0	0	0	0	0	0	0	0	0	0	0	nocov	1	1	0	0	0	0	nocov	0	1	0	0	0	nocov	1	0	0	0	0	0
O. sativa	IRIS_313-11351	XI-2	XI-2A	1	0	1	0	1	1	1	1	1	0	1	1	1	1	1	1	1	1	1	1	1	1	1	1	1	1	1	1	1	1	0	1	1	nocov	1	0	0	1	1	nocov	1	1	1	1	1	1
O. sativa	IRIS_313-11352	cB(Bas)	cB	1	1	0	1	0	1	1	1	1	1	0	1	1	1	1	1	0	1	0	0	1	1	0	0	1	0	nocov	1	0	nocov	1	0	0	0	1	0	0	nocov	1	0	nocov	0	1	1	1	1
O. sativa	IRIS_313-11353	cA(Aus)	cA2	1	0	1	0	1	1	1	1	1	1	1	1	1	1	1	1	1	0	nocov	0	0	0	0	0	0	1	nocov	nocov	0	0	0	0	0	0	0	0	0	0	0	nocov	1	1	0	1	0	1
O. sativa	IRIS_313-11354	XI-2	XI-2A	1	0	1	0	1	1	1	1	1	1	1	1	1	1	1	1	1	1	1	1	1	1	1	1	1	1	1	1	1	1	1	1	1	1	1	0	0	0	1	nocov	1	1	0	1	0	1
O. sativa	IRIS_313-11355	XI-adm	XI-1	1	1	1	0	1	1	1	1	1	0	1	1	1	1	1	1	1	1	1	1	1	1	1	1	1	0	nocov	1	1	0	1	1	1	1	0	0	1	0	0	1	1	1	1	1	0	1
O. sativa	IRIS_313-11356	cB(Bas)	cB	1	1	1	1	0	nocov	0	0	0	0	0	0	1	1	1	0	0	0	nocov	0	0	0	0	0	0	1	nocov	1	0	0	0	0	0	nocov	0	1	0	0	1	nocov	nocov	0	0	0	0	0
O. sativa	IRIS_313-11357	XI-1B	XI-1B1	1	1	1	0	1	1	1	1	1	0	1	1	1	1	1	1	1	1	1	1	1	1	1	1	1	1	1	1	1	1	1	1	1	1	1	0	0	0	1	1	1	1	1	1	1	1
O. sativa	IRIS_313-11358	XI-2	XI-2A	1	1	1	0	1	1	1	1	1	1	1	1	1	1	1	1	1	1	1	1	1	1	1	1	1	1	1	1	1	1	1	1	1	1	1	0	1	0	1	1	1	1	1	1	0	1
O. sativa	IRIS_313-11359	XI-2	XI-2A	1	0	1	0	1	1	1	1	1	0	1	1	1	1	1	1	1	1	1	1	1	1	1	1	1	1	1	1	1	1	1	1	1	1	1	0	1	1	1	0	1	1	1	1	1	1
O. sativa	IRIS_313-11360	cB(Bas)	admix	0	1	0	0	1	1	0	nocov	0	nocov	1	0	1	1	0	0	0	0	nocov	0	0	0	0	0	0	0	nocov	1	0	0	0	1	0	nocov	0	1	nocov	0	1	nocov	nocov	nocov	0	0	0	0
O. sativa	IRIS_313-11361	XI-2	XI-2A	1	1	0	0	1	1	1	1	1	1	1	1	1	1	1	1	1	1	1	1	1	1	1	1	1	1	1	1	1	1	1	1	1	1	1	0	0	1	1	0	1	1	1	0	1	1
O. sativa	IRIS_313-11362	cB(Bas)	cB	1	1	1	1	0	nocov	0	0	0	0	0	0	1	1	1	0	0	0	nocov	0	0	0	nocov	0	0	0	nocov	1	0	0	0	0	0	nocov	0	1	0	0	0	nocov	1	0	0	0	0	0
O. sativa	IRIS_313-11363	XI-2	XI-2	1	1	1	0	1	1	1	1	1	1	1	1	1	1	1	1	1	1	1	1	1	1	1	1	1	1	1	1	1	1	1	0	1	1	0	0	1	1	1	nocov	1	0	1	1	1	1
O. sativa	IRIS_313-11364	XI-adm	XI-2	1	0	1	0	0	1	1	0	0	0	0	1	1	1	1	1	0	1	1	1	0	0	0	1	0	1	1	1	1	1	0	1	1	nocov	1	0	0	0	0	nocov	1	nocov	0	1	1	0
O. sativa	IRIS_313-11365	XI-adm	XI-2A	1	1	1	0	1	1	1	1	1	nocov	1	1	1	1	1	1	1	1	1	1	1	1	1	1	0	1	1	1	1	1	1	1	1	1	1	0	0	0	1	1	1	0	1	1	1	1
O. sativa	IRIS_313-11367	XI-2	XI-2A	1	0	1	0	1	1	1	1	1	1	1	1	1	1	1	1	1	1	1	1	1	1	1	1	1	1	1	1	1	1	1	1	1	1	1	0	0	0	1	nocov	1	1	1	1	0	1
O. sativa	IRIS_313-11368	XI-2	XI-2A	1	1	1	0	1	1	1	1	1	1	1	1	1	1	1	1	0	1	1	1	1	1	1	1	1	0	1	1	1	1	1	1	1	nocov	1	0	1	0	1	1	1	nocov	1	nocov	1	1
O. sativa	IRIS_313-11369	XI-2	XI-2A	1	0	1	0	1	1	1	1	1	1	1	1	1	1	1	1	1	1	1	1	1	1	1	1	1	1	1	1	1	1	1	1	1	1	1	0	0	1	1	nocov	1	1	1	1	1	1
O. sativa	IRIS_313-11370	XI-2	XI-2B	1	0	1	0	1	1	1	1	1	1	1	1	1	1	1	1	1	1	1	1	1	1	1	1	1	1	1	1	1	1	1	0	1	1	0	0	0	1	1	nocov	1	1	1	1	1	1
O. sativa	IRIS_313-11371	cA(Aus)	cA-adm	1	1	1	0	1	1	1	1	1	0	1	1	1	1	1	1	1	1	1	1	1	1	0	0	0	0	nocov	1	0	0	0	0	0	0	nocov	0	1	0	0	nocov	1	nocov	1	1	0	1
O. sativa	IRIS_313-11372	XI-2	XI-2	1	1	1	0	1	1	1	1	1	1	1	1	1	1	1	1	1	0	1	1	1	1	1	1	1	1	1	1	1	1	1	0	1	1	1	0	0	1	1	0	1	nocov	1	1	1	1
O. sativa	IRIS_313-11373	cB(Bas)	cB	1	1	1	1	0	nocov	1	0	0	nocov	0	0	1	1	1	0	0	0	nocov	0	0	0	0	0	0	1	0	1	0	0	0	1	0	nocov	0	0	0	0	0	0	nocov	0	nocov	nocov	0	0
O. sativa	IRIS_313-11374	cA(Aus)	cA1	1	1	1	0	1	1	1	1	1	0	0	1	1	0	1	1	1	0	1	1	1	1	0	1	0	0	nocov	1	1	0	0	0	0	1	0	0	0	0	1	nocov	1	1	1	1	0	0
O. sativa	IRIS_313-11375	cB(Bas)	cB	1	1	1	1	0	nocov	1	1	0	nocov	1	0	1	1	1	0	0	0	1	1	1	0	0	0	0	0	nocov	1	1	0	0	1	1	nocov	0	0	0	0	0	nocov	1	0	0	0	0	0
O. sativa	IRIS_313-11376	GJ-trp	GJ-trop1	0	0	0	1	0	nocov	0	0	0	nocov	0	0	1	0	0	0	0	0	nocov	0	0	0	0	0	0	0	nocov	1	0	nocov	0	0	0	nocov	0	1	0	0	0	0	0	0	1	0	0	0
O. sativa	IRIS_313-11377	XI-adm	XI-3B2	1	1	1	0	1	1	0	1	1	1	1	1	1	1	1	1	1	1	1	1	1	1	1	1	1	1	1	1	1	1	1	1	0	1	0	0	1	1	1	nocov	1	0	1	1	1	1
O. sativa	IRIS_313-11379	GJ-trp	GJ-trop1	0	0	0	1	0	1	0	0	0	1	0	0	1	0	0	0	0	0	0	0	0	0	0	0	0	0	nocov	1	0	nocov	0	0	0	nocov	0	1	0	1	0	0	1	0	1	0	0	0
O. sativa	IRIS_313-11380	GJ-trp	GJ-trop1	1	1	nocov	1	1	1	1	1	1	1	1	1	1	nocov	1	1	0	1	1	1	0	1	nocov	1	1	1	nocov	1	1	1	nocov	1	0	nocov	0	1	1	1	1	nocov	1	1	1	1	1	1
O. sativa	IRIS_313-11381	XI-3	XI-3B2	1	1	1	0	1	1	1	1	1	1	1	1	1	1	1	1	0	1	1	1	1	1	1	1	1	1	1	1	1	1	1	1	0	nocov	0	0	1	1	1	nocov	1	1	1	1	1	1
O. sativa	IRIS_313-11382	XI-adm	XI-adm	1	1	1	0	1	1	1	1	1	1	1	1	1	1	1	1	1	1	1	1	1	0	1	1	0	1	nocov	1	1	1	1	1	0	nocov	1	0	1	1	1	nocov	1	nocov	1	1	1	1
O. sativa	IRIS_313-11383	XI-adm	XI-3B	1	1	1	0	1	1	1	1	1	1	1	1	1	1	1	1	0	0	1	1	1	1	0	1	1	1	1	1	1	nocov	1	1	1	1	0	0	0	1	1	1	1	1	0	1	1	1
O. sativa	IRIS_313-11384	XI-adm	XI-3B	0	1	1	0	1	1	1	1	1	1	1	1	1	1	1	1	0	0	1	1	1	1	0	1	1	1	1	1	1	1	0	1	1	1	1	0	0	1	1	1	1	1	1	1	1	1
O. sativa	IRIS_313-11385	XI-adm	XI-1B	1	1	1	0	1	1	1	1	1	1	1	1	1	1	1	1	0	1	1	1	1	1	1	1	1	1	1	1	1	1	1	1	1	nocov	1	0	1	1	1	1	1	1	1	1	0	1
O. sativa	IRIS_313-11386	XI-3	XI-3B1	1	0	1	0	1	1	1	1	1	1	1	1	1	1	1	1	0	1	1	1	1	1	1	1	1	1	1	1	1	1	1	0	0	1	1	0	1	1	1	1	1	1	1	1	1	1
O. sativa	IRIS_313-11387	XI-3	XI-3	1	1	1	0	1	1	1	1	0	1	1	1	1	1	1	1	0	1	1	0	1	1	1	1	1	1	1	1	0	1	1	0	0	0	0	0	0	1	1	1	1	nocov	1	1	0	1
O. sativa	IRIS_313-11388	XI-3	XI-3B1	1	1	1	0	1	1	1	1	1	1	1	1	1	1	1	1	0	1	1	1	1	1	1	1	1	1	1	1	1	1	1	1	1	nocov	1	0	1	1	1	1	1	1	1	1	1	1
O. sativa	IRIS_313-11389	XI-3	XI-3B1	1	1	1	0	1	1	1	1	1	1	1	1	1	1	1	1	0	1	1	1	1	1	1	1	1	1	1	1	1	1	1	0	0	nocov	0	0	1	0	1	1	1	0	1	1	1	1
O. sativa	IRIS_313-11390	XI-3	XI-3B1	1	1	1	0	1	1	1	1	1	1	1	1	1	1	1	1	0	1	1	1	1	1	1	1	1	1	1	1	1	1	1	1	1	1	1	0	1	0	1	1	1	1	0	1	1	1
O. sativa	IRIS_313-11391	XI-3	XI-3B1	1	1	1	0	1	1	1	1	1	1	1	1	1	1	1	1	0	1	1	1	1	1	1	1	1	1	1	1	1	1	1	1	0	nocov	1	0	1	0	1	1	1	1	1	1	1	1
O. sativa	IRIS_313-11392	XI-3	XI-3B1	1	1	1	0	1	1	1	1	1	1	1	1	1	1	1	1	0	1	1	1	1	1	1	1	1	1	1	1	1	1	1	0	0	1	1	0	1	0	1	1	1	1	1	1	0	1
O. sativa	IRIS_313-11393	XI-3	XI-3B1	1	1	1	0	1	1	1	1	1	1	1	1	1	1	1	1	0	1	1	1	1	1	1	1	1	1	1	1	1	1	1	1	1	1	1	0	1	0	1	1	1	1	1	1	1	1
O. sativa	IRIS_313-11394	XI-adm	XI-adm	1	0	1	0	1	1	1	1	1	0	1	1	1	1	1	1	0	1	1	1	1	1	1	1	1	1	nocov	1	1	1	1	1	1	1	1	0	0	0	1	1	1	nocov	1	1	0	1
O. sativa	IRIS_313-11395	XI-3	XI-3A	1	0	1	0	1	1	1	1	1	1	1	1	1	1	0	1	0	1	1	1	1	1	1	1	1	1	1	1	1	1	1	1	1	1	1	0	1	1	1	nocov	1	1	1	1	1	1
O. sativa	IRIS_313-11396	GJ-trp	GJ-trop1	0	1	1	1	0	nocov	0	0	0	1	0	0	1	0	1	0	0	1	nocov	0	0	0	0	0	1	0	nocov	1	0	1	0	1	0	1	0	1	0	1	0	nocov	1	0	0	0	1	0
O. sativa	IRIS_313-11397	GJ-trp	GJ-trop1	0	1	0	1	0	1	0	0	0	1	0	0	1	0	0	0	0	0	nocov	0	0	0	0	0	0	1	nocov	1	0	nocov	0	0	0	nocov	0	1	0	0	1	0	1	0	0	0	0	0
O. sativa	IRIS_313-11398	XI-3	XI-3A	1	1	1	0	1	1	1	1	1	1	1	1	1	1	1	1	0	1	1	1	1	1	1	1	1	1	1	1	1	1	1	1	0	1	0	0	1	0	1	nocov	1	0	1	1	1	1
O. sativa	IRIS_313-11399	XI-adm	XI-2A	1	1	1	0	1	1	1	1	1	1	1	1	1	1	1	1	0	1	1	1	1	1	1	0	1	1	1	1	1	1	0	1	1	1	1	0	1	0	1	1	1	1	0	1	1	1
O. sativa	IRIS_313-11400	XI-adm	XI-2	1	0	1	0	1	1	1	1	1	1	1	1	1	1	1	1	0	1	1	1	1	1	1	1	1	0	1	1	1	1	0	1	1	1	1	0	1	0	1	nocov	1	nocov	1	1	1	1
O. sativa	IRIS_313-11401	cB(Bas)	cB	nocov	1	1	1	0	nocov	0	0	0	0	nocov	nocov	nocov	1	1	0	0	1	nocov	0	0	0	0	0	0	0	nocov	1	0	0	0	0	0	nocov	0	0	nocov	0	1	nocov	1	1	0	1	0	0
O. sativa	IRIS_313-11402	XI-adm	XI-2A	1	1	1	0	1	1	1	1	1	1	1	0	1	0	1	1	1	1	1	1	1	1	0	1	1	1	1	1	1	1	1	1	1	1	1	0	1	1	1	1	1	nocov	0	0	1	1
O. sativa	IRIS_313-11403	XI-adm	XI-adm	1	1	1	0	1	1	1	1	1	1	1	1	1	1	1	1	0	1	1	1	1	1	1	1	1	0	1	1	1	1	1	1	1	1	1	0	1	0	1	nocov	nocov	nocov	1	1	0	1
O. sativa	IRIS_313-11404	XI-2	XI-2A	1	1	1	0	1	1	1	1	1	1	1	1	1	1	1	1	0	1	1	1	1	1	1	1	1	1	1	1	1	1	0	1	1	1	1	0	1	0	1	1	nocov	1	1	1	1	1
O. sativa	IRIS_313-11405	XI-3	XI-3	1	1	1	0	1	1	1	1	1	1	1	1	1	1	1	1	0	1	1	1	1	1	1	1	1	1	1	1	1	1	1	0	1	1	0	1	1	0	1	1	1	nocov	1	1	1	1
O. sativa	IRIS_313-11406	XI-3	XI-3B1	1	0	1	0	1	1	1	1	1	1	1	1	1	1	1	1	0	1	1	1	1	1	1	1	1	1	1	1	1	1	1	0	0	1	1	0	1	1	1	1	1	1	1	1	1	1
O. sativa	IRIS_313-11407	XI-2	XI-2A	1	0	1	0	1	1	1	1	1	1	1	1	1	1	1	1	1	1	1	0	1	1	1	0	1	1	1	1	1	1	1	1	0	1	1	0	1	1	1	nocov	1	1	1	1	1	1
O. sativa	IRIS_313-11408	XI-2	XI-2B	1	1	1	0	1	1	1	1	1	1	1	1	1	1	1	1	1	1	1	1	1	1	1	1	1	1	nocov	1	1	1	1	0	1	1	nocov	0	0	1	1	1	1	nocov	1	1	1	1
O. sativa	IRIS_313-11409	XI-2	XI-2B	1	1	1	0	1	1	1	1	1	1	1	0	1	1	1	1	1	1	1	1	1	1	1	1	1	1	nocov	1	1	1	0	1	1	1	nocov	0	0	1	1	nocov	1	nocov	1	1	1	1
O. sativa	IRIS_313-11410	XI-adm	XI-adm	1	1	1	0	1	1	1	1	1	1	nocov	1	1	1	1	1	0	1	1	0	1	1	1	1	1	1	1	1	1	1	1	0	0	1	0	0	1	1	1	nocov	1	nocov	1	1	1	1
O. sativa	IRIS_313-11411	XI-2	XI-2B	1	1	1	0	1	1	1	1	1	1	nocov	1	1	1	1	1	1	0	1	1	1	1	1	1	1	1	nocov	1	1	1	1	1	1	1	0	0	0	1	1	nocov	1	1	1	1	1	1
O. sativa	IRIS_313-11413	cA(Aus)	cA-adm	1	0	1	0	1	1	1	0	0	0	nocov	nocov	1	0	1	1	1	0	nocov	0	0	1	0	0	0	0	nocov	nocov	0	0	0	0	0	0	0	1	nocov	0	0	0	nocov	0	0	0	0	0
O. sativa	IRIS_313-11414	XI-adm	XI-adm	1	1	1	0	1	1	1	1	1	1	1	1	1	1	1	1	1	1	1	0	1	1	1	1	1	1	nocov	1	1	1	1	1	1	1	0	0	0	1	1	nocov	1	1	1	1	1	1
O. sativa	IRIS_313-11415	admix	admix	1	1	1	0	1	1	1	1	0	1	nocov	1	1	1	1	1	1	1	1	nocov	1	1	nocov	1	1	1	1	1	1	1	1	0	1	1	0	0	1	1	1	nocov	1	nocov	1	1	0	1
O. sativa	IRIS_313-11416	XI-2	XI-2A	1	1	1	0	1	1	1	1	1	1	1	1	1	1	1	1	0	1	1	1	1	1	1	1	1	1	1	1	1	1	1	1	1	1	1	0	1	1	1	1	1	1	1	1	1	1
O. sativa	IRIS_313-11417	admix	admix	1	1	1	0	1	nocov	1	1	1	1	1	0	1	1	1	1	1	0	1	1	1	0	nocov	1	0	0	nocov	1	1	1	0	1	0	nocov	0	0	0	1	0	nocov	0	0	0	0	0	1
O. sativa	IRIS_313-11418	XI-2	XI-2A	1	0	1	0	1	1	1	1	1	1	1	1	1	1	1	1	1	1	1	1	1	1	1	1	1	1	1	1	1	1	1	1	1	1	1	0	1	1	1	nocov	1	1	0	1	1	1
O. sativa	IRIS_313-11419	XI-adm	XI-adm	1	1	1	0	1	1	1	1	1	1	nocov	1	1	1	1	1	0	1	1	nocov	1	1	1	1	1	1	1	1	1	1	1	1	0	1	1	1	0	1	1	1	0	0	1	1	1	1
O. sativa	IRIS_313-11420	XI-2	XI-2B	1	1	1	0	1	1	1	1	1	0	1	1	1	1	1	1	1	1	1	1	1	1	1	1	1	0	1	1	1	1	1	0	1	1	nocov	0	0	1	1	nocov	1	0	1	1	1	1
O. sativa	IRIS_313-11421	XI-2	XI-2	1	1	1	0	1	1	1	1	1	1	1	1	1	1	1	1	0	1	1	1	1	1	1	1	1	1	1	1	1	1	1	1	1	1	0	0	1	1	1	1	nocov	nocov	1	1	0	1
O. sativa	IRIS_313-11422	XI-1A	XI-1A	1	1	1	0	1	1	1	1	1	1	1	1	1	1	1	1	1	1	1	0	1	1	1	1	1	1	1	1	1	1	0	0	1	1	1	0	1	1	1	1	1	1	1	1	1	1
O. sativa	IRIS_313-11423	XI-adm	XI-adm	1	1	1	1	1	1	0	1	1	1	1	1	1	1	1	1	nocov	0	nocov	1	1	1	1	1	1	1	nocov	1	1	1	1	1	1	1	1	0	1	0	1	1	1	nocov	1	1	1	1
O. sativa	IRIS_313-11424	GJ-trp	GJ-trop1	0	0	0	1	0	nocov	nocov	0	0	1	0	0	1	0	0	0	0	0	nocov	0	0	0	0	0	0	1	nocov	1	1	nocov	0	0	0	nocov	0	1	0	0	1	nocov	1	0	0	0	0	0
O. sativa	IRIS_313-11425	admix	admix	1	1	1	1	1	1	1	0	1	0	1	1	1	1	1	1	0	1	1	1	0	1	1	1	1	1	1	1	1	1	1	1	1	nocov	1	1	1	0	0	1	nocov	1	1	1	1	1
O. sativa	IRIS_313-11426	GJ-trp	GJ-trop1	0	1	0	1	0	nocov	nocov	0	0	1	nocov	0	1	0	0	0	0	0	nocov	0	0	0	0	0	0	0	nocov	1	0	nocov	0	0	0	nocov	0	1	0	1	0	0	1	0	1	nocov	0	0
O. sativa	IRIS_313-11427	GJ-trp	GJ-trop1	0	0	0	1	0	nocov	0	0	0	0	0	0	1	0	0	0	0	0	nocov	0	0	0	0	0	0	0	nocov	1	nocov	nocov	0	nocov	0	nocov	0	1	0	0	0	nocov	0	0	1	0	0	0
O. sativa	IRIS_313-11428	GJ-trp	GJ-trop1	0	0	0	1	0	nocov	0	0	0	0	0	0	1	0	0	0	0	0	nocov	0	0	0	0	0	0	0	nocov	1	0	nocov	0	0	0	nocov	0	1	0	0	0	nocov	0	0	1	0	0	0
O. sativa	IRIS_313-11429	GJ-trp	GJ-trop1	0	nocov	0	1	0	1	0	0	0	1	0	0	1	nocov	0	0	0	0	nocov	0	0	0	0	0	0	0	nocov	1	0	nocov	0	0	0	nocov	0	1	0	nocov	0	0	1	0	0	0	0	0
O. sativa	IRIS_313-11431	XI-3	XI-3A	1	1	1	1	1	1	nocov	1	1	1	1	1	1	1	1	1	0	0	nocov	1	1	1	1	1	1	1	1	1	1	1	1	1	1	1	1	0	1	0	1	1	1	1	1	0	1	1
O. sativa	IRIS_313-11432	admix	admix	1	1	1	0	1	1	1	1	1	1	1	1	1	1	1	1	1	1	nocov	0	1	0	0	0	1	1	1	1	1	1	1	0	0	1	0	1	1	0	1	1	1	1	1	1	1	1
O. sativa	IRIS_313-11433	XI-1A	XI-1	1	1	1	0	1	1	1	1	1	1	1	1	1	1	1	1	1	1	1	1	1	1	1	1	1	1	1	1	1	1	1	1	1	1	1	0	0	0	1	1	1	1	1	1	1	1
O. sativa	IRIS_313-11434	GJ-trp	GJ-trop1	0	0	1	1	0	1	0	0	0	0	0	0	1	0	0	0	0	0	0	0	0	0	0	0	0	0	nocov	1	0	nocov	0	0	0	nocov	0	1	0	0	0	nocov	0	0	0	0	0	0
O. sativa	IRIS_313-11435	GJ-trp	GJ-trop1	0	1	0	1	0	1	0	0	0	1	0	0	1	0	0	0	0	0	0	0	0	0	0	0	0	0	nocov	1	0	nocov	0	0	0	nocov	0	1	0	1	0	nocov	0	0	0	0	0	0
O. sativa	IRIS_313-11436	GJ-trp	GJ-trop1	0	0	0	1	0	1	0	0	0	1	0	0	1	0	0	0	0	0	nocov	0	0	0	0	0	0	0	nocov	1	0	nocov	0	0	0	nocov	0	1	0	1	0	0	0	0	0	0	0	0
O. sativa	IRIS_313-11437	XI-1B	XI-1B	1	0	1	0	1	1	1	1	1	1	1	1	1	1	1	1	0	1	1	1	1	1	0	1	1	1	1	1	1	1	1	1	1	0	1	0	0	0	1	1	1	1	1	1	1	1
O. sativa	IRIS_313-11438	XI-adm	XI-adm	1	1	1	0	1	1	1	1	1	0	1	1	1	1	1	1	0	1	1	1	1	1	1	1	1	1	1	1	1	1	1	1	0	1	1	0	1	0	1	1	1	1	1	1	1	1
O. sativa	IRIS_313-11439	GJ-trp	GJ-trop1	0	0	0	1	0	nocov	0	0	0	1	0	0	1	0	0	0	0	0	nocov	0	0	0	0	0	0	1	nocov	1	0	nocov	0	0	0	nocov	0	1	0	1	0	0	1	0	0	0	0	0
O. sativa	IRIS_313-11441	GJ-trp	GJ-trop1	0	1	1	1	0	nocov	0	0	0	1	0	0	1	0	0	0	0	0	nocov	0	0	0	0	0	0	1	nocov	1	0	nocov	0	0	nocov	nocov	0	1	0	0	0	0	1	0	1	0	0	0
O. sativa	IRIS_313-11442	XI-adm	XI-adm	1	1	1	0	1	1	1	1	1	1	1	1	1	1	1	1	0	1	1	1	1	1	1	1	1	1	1	1	1	1	1	1	1	1	1	0	1	1	1	nocov	1	0	1	1	0	1
O. sativa	IRIS_313-11443	XI-adm	XI-adm	1	1	1	0	1	1	1	1	1	1	1	1	1	1	1	1	0	1	1	1	1	1	1	1	1	1	0	1	1	1	1	1	1	nocov	1	0	1	1	1	nocov	1	0	0	1	1	1
O. sativa	IRIS_313-11445	XI-2	XI-2	1	1	1	0	1	1	1	1	1	1	1	1	1	1	1	1	1	1	1	1	1	1	1	1	1	1	1	1	1	1	1	1	1	1	0	0	0	0	1	nocov	1	1	1	1	1	1
O. sativa	IRIS_313-11446	XI-2	XI-2B	1	1	1	0	1	1	1	1	1	1	1	1	1	1	1	1	1	1	1	1	1	1	1	1	1	1	1	1	1	1	1	nocov	1	0	nocov	0	0	1	1	0	1	1	1	1	1	1
O. sativa	IRIS_313-11447	XI-adm	XI-adm	1	1	1	0	1	1	1	1	1	1	1	nocov	1	1	1	1	1	1	1	1	1	1	0	1	1	1	1	1	1	1	1	1	0	nocov	1	0	1	0	1	1	1	1	0	1	1	1
O. sativa	IRIS_313-11448	XI-2	XI-2	1	0	1	0	1	1	1	1	1	1	1	1	1	1	1	1	1	1	1	1	1	1	1	0	1	1	1	1	1	1	1	1	0	1	0	0	1	1	1	1	1	nocov	0	0	1	1
O. sativa	IRIS_313-11449	XI-adm	XI-2A	1	1	1	0	1	1	1	1	1	1	1	1	1	1	1	1	0	1	1	1	1	1	1	1	0	1	1	1	1	0	0	1	0	1	nocov	0	0	0	0	0	0	nocov	1	1	0	0
O. sativa	IRIS_313-11451	cB(Bas)	cB	1	0	1	1	1	nocov	0	0	0	0	0	0	nocov	1	1	0	0	0	nocov	0	0	0	0	0	0	1	nocov	1	0	0	0	0	0	0	0	0	nocov	0	1	0	nocov	0	0	0	0	0
O. sativa	IRIS_313-11452	cA(Aus)	cA-adm	1	1	1	0	1	1	1	1	0	1	0	1	1	0	1	1	1	0	nocov	1	1	1	0	0	0	1	1	1	1	nocov	1	0	0	1	nocov	0	0	1	0	0	nocov	1	0	1	1	1
O. sativa	IRIS_313-11453	XI-2	XI-2B	1	1	1	0	1	1	1	1	1	1	1	1	1	1	1	1	1	1	1	1	1	1	1	1	0	1	1	1	1	1	1	1	1	1	0	0	0	0	1	nocov	1	1	1	0	1	1
O. sativa	IRIS_313-11454	cA(Aus)	cA1	1	1	1	0	1	nocov	1	1	0	0	nocov	nocov	1	1	1	1	1	1	1	1	1	1	0	1	0	0	nocov	1	1	1	0	0	0	1	nocov	0	nocov	0	0	nocov	1	1	0	1	0	0
O. sativa	IRIS_313-11455	cA(Aus)	cA2	1	1	1	0	1	1	1	1	0	0	0	nocov	1	0	1	1	1	0	1	1	1	1	0	0	0	0	nocov	1	1	0	0	0	0	0	0	0	1	0	1	nocov	nocov	1	0	1	0	1
O. sativa	IRIS_313-11456	cA(Aus)	cA1	1	1	1	0	1	1	1	1	1	0	1	1	1	1	1	1	1	0	1	0	1	1	0	1	0	0	nocov	1	1	0	0	0	0	1	nocov	0	1	nocov	0	nocov	1	1	1	1	0	0
O. sativa	IRIS_313-11458	cA(Aus)	cA2	1	1	1	0	1	1	1	1	1	1	1	1	1	1	1	1	1	0	nocov	0	1	0	0	0	0	0	nocov	1	1	0	1	0	0	1	nocov	0	nocov	1	1	nocov	1	1	1	1	0	0
O. sativa	IRIS_313-11460	XI-2	XI-2	1	1	1	0	1	1	1	1	1	1	1	1	1	1	1	1	1	0	nocov	1	1	1	1	1	1	1	nocov	1	1	1	1	1	1	1	0	0	0	0	0	nocov	1	1	1	1	0	1
O. sativa	IRIS_313-11461	XI-2	XI-2B	1	1	1	0	1	1	1	1	1	1	1	1	1	1	1	1	1	1	1	1	0	1	1	1	1	1	nocov	nocov	1	1	1	1	1	1	0	0	0	1	0	nocov	1	1	1	1	1	1
O. sativa	IRIS_313-11462	cA(Aus)	cA1	1	1	1	0	1	1	1	1	1	0	1	1	1	0	1	1	1	0	1	0	1	1	0	1	0	0	nocov	1	1	0	0	0	0	1	0	0	1	nocov	0	nocov	1	1	1	1	0	0
O. sativa	IRIS_313-11463	XI-adm	XI-3B2	1	1	1	0	1	1	1	1	1	1	1	1	1	1	1	1	0	1	1	1	1	1	1	1	1	0	1	1	1	1	0	1	1	1	1	0	1	1	1	nocov	1	1	1	1	1	1
O. sativa	IRIS_313-11464	GJ-trp	GJ-trop1	0	0	0	1	0	nocov	0	0	0	1	0	0	1	0	0	0	0	0	nocov	0	0	0	0	0	0	0	nocov	1	0	nocov	0	0	0	nocov	0	1	0	0	0	nocov	1	0	1	0	0	0
O. sativa	IRIS_313-11465	GJ-trp	GJ-trop1	0	0	nocov	1	0	nocov	0	0	0	1	0	0	1	nocov	0	0	0	0	0	0	0	0	1	0	0	0	0	1	0	nocov	0	0	0	nocov	0	1	0	0	0	nocov	1	0	1	0	1	0
O. sativa	IRIS_313-11467	XI-3	XI-3A	1	0	1	0	1	1	1	1	1	1	1	1	1	1	1	1	0	1	1	1	1	1	0	1	1	1	1	1	1	1	1	0	0	1	0	0	1	0	1	1	1	0	1	1	1	1
O. sativa	IRIS_313-11471	XI-adm	XI-adm	1	1	1	0	1	1	1	1	1	1	1	1	1	1	1	1	0	1	1	1	1	1	1	1	1	1	1	1	1	1	1	1	1	1	1	0	0	0	1	1	1	1	1	1	1	1
O. sativa	IRIS_313-11472	XI-3	XI-3B	1	1	1	0	1	1	1	1	1	1	1	1	1	1	1	1	0	1	1	1	1	1	1	1	1	1	1	1	1	1	1	1	0	nocov	1	0	1	1	1	nocov	1	1	1	1	1	1
O. sativa	IRIS_313-11473	GJ-trp	GJ-trop1	0	0	0	1	0	nocov	0	0	0	0	0	0	1	nocov	0	1	0	0	0	0	0	0	0	0	0	0	0	nocov	0	nocov	0	0	0	nocov	0	1	0	0	0	nocov	nocov	nocov	0	0	0	0
O. sativa	IRIS_313-11476	cA(Aus)	cA-adm	1	1	1	0	1	nocov	1	1	1	0	0	1	1	0	1	1	1	0	nocov	0	1	0	1	0	0	0	nocov	1	1	0	0	0	0	1	nocov	0	0	0	1	nocov	1	0	1	1	0	0
O. sativa	IRIS_313-11477	cA(Aus)	cA-adm	1	1	1	0	1	nocov	1	1	0	0	0	1	1	0	1	1	1	0	1	1	1	1	0	1	0	0	nocov	1	1	0	0	0	0	0	0	0	1	0	1	0	1	1	0	1	0	0
O. sativa	IRIS_313-11478	XI-2	XI-2B	1	1	1	0	1	1	1	1	1	1	1	1	1	1	1	1	1	0	1	1	1	1	1	1	0	1	1	1	1	0	1	1	0	1	0	0	nocov	1	1	nocov	1	1	0	1	1	1
O. sativa	IRIS_313-11479	GJ-trp	GJ-trop2	0	0	1	1	0	nocov	0	0	0	0	0	0	nocov	0	0	0	0	1	nocov	0	0	0	0	0	0	0	nocov	1	0	nocov	0	0	0	nocov	0	1	0	0	1	1	nocov	0	0	0	0	0
O. sativa	IRIS_313-11480	XI-1B	XI-1B2	1	1	1	0	1	1	1	1	1	1	1	1	1	nocov	1	1	1	1	1	1	1	1	1	1	1	1	1	1	1	1	1	1	1	nocov	1	0	0	0	1	1	1	1	1	1	1	1
O. sativa	IRIS_313-11481	cA(Aus)	cA1	1	1	1	0	1	1	1	1	1	0	1	1	1	1	1	1	1	0	1	1	1	1	0	0	0	0	nocov	1	1	1	0	0	0	1	nocov	0	0	1	1	nocov	1	1	1	1	0	0
O. sativa	IRIS_313-11482	cA(Aus)	cA2	1	0	1	0	1	1	1	1	1	1	1	1	1	1	1	1	1	0	0	1	1	0	nocov	0	0	0	nocov	1	0	0	0	0	0	nocov	0	0	nocov	0	0	nocov	1	1	0	1	0	1
O. sativa	IRIS_313-11483	cA(Aus)	cA1	1	1	1	0	1	1	1	1	1	0	1	1	1	1	1	1	1	0	1	1	1	1	0	1	0	0	nocov	1	1	0	0	0	0	nocov	nocov	0	0	0	1	nocov	1	0	0	1	0	0
O. sativa	IRIS_313-11484	cA(Aus)	cA2	1	1	1	0	1	nocov	1	1	1	0	1	1	1	1	1	1	1	1	nocov	1	1	0	0	1	0	0	nocov	1	0	0	0	0	0	1	0	0	0	0	1	nocov	1	1	0	1	0	1
O. sativa	IRIS_313-11485	XI-3	XI-3B1	1	0	1	0	1	1	1	1	1	1	1	1	1	1	1	1	0	1	1	1	1	1	1	1	1	1	1	1	1	1	1	0	0	nocov	1	0	1	1	1	nocov	1	1	1	1	1	1
O. sativa	IRIS_313-11486	admix	admix	1	nocov	1	0	1	1	1	1	1	1	1	1	1	1	1	1	1	1	1	1	1	0	1	1	1	1	1	1	1	1	1	1	0	1	0	0	1	0	1	1	1	1	1	1	1	1
O. sativa	IRIS_313-11487	XI-2	XI-2	1	0	0	0	1	1	1	1	1	1	1	1	1	1	1	1	1	1	1	1	0	1	0	1	1	1	1	nocov	1	1	0	1	1	1	1	1	0	1	0	nocov	1	nocov	1	0	1	1
O. sativa	IRIS_313-11489	cA(Aus)	cA1	1	1	1	0	1	1	1	1	0	0	0	1	1	1	1	1	1	0	1	1	1	1	0	0	1	1	1	1	1	0	0	0	0	0	0	0	1	0	1	nocov	1	1	1	1	1	0
O. sativa	IRIS_313-11490	XI-adm	XI-adm	1	1	1	0	1	1	1	1	1	1	1	1	1	1	1	1	1	1	1	1	1	1	1	1	1	1	1	1	1	1	0	1	1	1	1	0	1	0	1	1	1	1	1	1	1	1
O. sativa	IRIS_313-11491	XI-2	XI-2B	1	nocov	1	0	1	1	1	1	1	1	1	1	1	1	1	1	1	1	1	1	1	1	1	1	1	1	nocov	1	1	1	1	1	1	1	1	0	0	1	1	1	0	1	1	1	1	1
O. sativa	IRIS_313-11492	cA(Aus)	cA2	1	1	1	0	1	1	1	1	1	1	1	1	1	1	1	1	1	1	nocov	1	1	0	0	0	0	0	nocov	1	1	0	1	0	0	1	0	0	0	0	0	nocov	1	1	0	1	0	1
O. sativa	IRIS_313-11493	XI-adm	XI-3	1	1	1	0	1	1	1	1	1	1	1	1	1	1	1	1	0	1	1	1	1	1	1	1	1	1	1	1	1	1	1	1	0	1	1	0	1	1	1	1	1	1	1	0	0	1
O. sativa	IRIS_313-11494	GJ-sbtrp	GJ-subtrp	0	0	0	1	0	nocov	0	0	0	1	0	0	1	0	0	0	0	0	nocov	0	0	0	0	0	0	0	nocov	1	0	nocov	0	0	0	nocov	0	1	0	0	1	nocov	0	0	0	0	0	0
O. sativa	IRIS_313-11495	GJ-trp	GJ-trop1	0	0	0	1	0	nocov	0	0	0	1	0	0	1	0	0	0	0	0	nocov	0	0	0	0	0	0	1	nocov	nocov	0	nocov	0	0	0	nocov	0	1	0	0	1	0	1	0	0	0	0	0
O. sativa	IRIS_313-11496	GJ-trp	GJ-trop2	0	0	0	1	0	nocov	0	1	0	0	0	0	1	0	0	0	0	0	nocov	0	0	0	0	0	0	0	1	nocov	0	nocov	0	0	0	nocov	0	1	0	0	0	1	nocov	0	0	1	0	0
O. sativa	IRIS_313-11497	XI-2	XI-2B	1	1	1	0	1	1	1	1	1	1	1	1	1	1	1	1	1	0	1	1	1	1	1	1	1	1	1	1	1	1	1	1	1	1	0	0	0	0	1	nocov	1	1	1	1	1	1
O. sativa	IRIS_313-11498	GJ-trp	GJ-trop2	nocov	0	0	1	0	nocov	0	0	0	1	0	0	nocov	0	0	0	0	0	nocov	0	0	0	0	0	0	0	nocov	1	0	nocov	0	0	0	nocov	0	1	0	0	1	1	0	0	0	0	0	0
O. sativa	IRIS_313-11499	GJ-trp	GJ-trop1	0	0	0	1	0	nocov	0	0	0	1	0	0	1	0	0	0	0	0	nocov	0	0	0	0	0	0	1	nocov	1	0	nocov	0	0	0	nocov	0	1	0	0	1	nocov	0	0	0	0	0	0
O. sativa	IRIS_313-11500	XI-2	XI-2A	1	1	1	0	1	1	1	1	1	1	1	1	1	nocov	1	0	1	1	1	1	1	1	1	1	1	1	1	1	1	1	1	1	1	1	1	0	1	0	1	1	1	1	1	1	1	1
O. sativa	IRIS_313-11505	XI-2	XI-2B	1	0	1	0	1	nocov	1	1	1	1	1	1	1	1	1	1	1	1	1	1	0	1	1	0	1	1	1	nocov	1	1	1	1	1	1	nocov	0	1	1	0	nocov	1	1	1	1	1	1
O. sativa	IRIS_313-11506	XI-adm	XI-adm	1	0	1	0	1	1	1	1	1	1	1	1	1	1	0	1	0	1	1	1	1	1	1	1	1	1	1	1	1	1	1	1	0	1	1	0	0	0	1	nocov	1	1	1	1	1	1
O. sativa	IRIS_313-11507	XI-1B	XI-1B	1	1	1	1	1	1	1	1	1	1	1	1	1	nocov	1	1	1	1	1	1	1	1	1	1	1	1	1	1	1	1	1	1	1	1	1	0	0	0	1	1	1	nocov	1	0	1	1
O. sativa	IRIS_313-11508	XI-3	XI-3B1	1	0	1	0	1	1	1	1	1	1	1	1	1	1	1	1	0	1	1	1	1	1	1	1	1	1	nocov	1	1	1	1	1	0	1	1	0	1	0	1	1	1	nocov	1	1	1	1
O. sativa	IRIS_313-11509	XI-3	XI-3B1	1	1	1	0	1	1	1	1	1	1	1	1	1	nocov	1	1	0	1	1	1	1	1	1	1	1	1	1	1	1	1	1	0	0	nocov	1	0	1	0	1	1	1	nocov	1	1	1	1
O. sativa	IRIS_313-11510	XI-adm	XI-adm	1	1	1	0	1	1	1	1	1	1	1	1	1	0	1	1	1	1	1	1	1	1	1	1	1	1	1	1	1	1	1	1	1	1	1	0	1	1	1	0	1	1	1	1	1	1
O. sativa	IRIS_313-11511	GJ-trp	GJ-trop1	nocov	0	0	1	0	nocov	0	0	0	0	0	0	1	nocov	0	1	0	0	0	0	0	0	0	0	0	0	0	nocov	0	nocov	0	0	0	nocov	0	1	0	0	0	nocov	0	nocov	0	0	0	0
O. sativa	IRIS_313-11512	XI-adm	XI-3B2	1	1	1	0	1	1	1	1	1	1	1	1	1	1	1	1	0	1	1	1	1	1	1	1	1	1	1	1	1	1	1	1	1	nocov	1	0	0	1	1	1	1	1	1	1	1	1
O. sativa	IRIS_313-11513	XI-1B	XI-1B2	1	1	1	0	1	1	1	1	1	1	1	1	1	1	1	1	0	1	1	1	1	1	1	1	1	1	1	1	1	1	0	1	1	1	1	0	0	0	1	1	1	1	1	1	1	1
O. sativa	IRIS_313-11515	XI-adm	XI-adm	1	1	1	0	1	1	1	1	1	1	nocov	1	1	1	1	1	1	0	1	1	1	1	1	1	0	1	1	1	1	1	1	1	0	0	1	0	1	1	0	1	1	1	1	1	1	1
O. sativa	IRIS_313-11516	XI-adm	XI-adm	1	1	1	0	1	1	1	1	1	1	1	1	1	1	0	1	1	1	1	1	1	1	1	1	1	1	1	1	1	1	1	1	1	1	1	0	1	0	0	nocov	1	0	1	1	1	1
O. sativa	IRIS_313-11517	XI-1B	XI-1B1	1	1	1	0	1	1	1	1	1	1	0	1	1	1	1	1	1	1	1	1	1	1	1	1	1	1	1	1	1	1	1	1	1	1	1	0	1	1	1	1	1	1	1	1	1	1
O. sativa	IRIS_313-11521	XI-adm	XI-adm	1	1	1	0	1	1	1	1	1	1	1	1	1	1	1	1	1	1	1	1	1	1	1	1	1	1	1	1	1	1	1	1	0	nocov	1	0	0	1	1	1	1	1	1	1	1	1
O. sativa	IRIS_313-11522	GJ-adm	GJ-temp	0	0	0	1	0	nocov	1	0	0	0	0	0	1	0	0	0	0	0	nocov	0	0	0	0	0	0	0	nocov	nocov	0	nocov	0	0	0	nocov	0	1	0	0	0	0	nocov	0	0	0	0	1
O. sativa	IRIS_313-11523	XI-adm	XI-adm	1	1	1	0	1	1	1	1	1	1	1	1	1	1	1	1	0	1	1	1	1	1	1	1	1	1	nocov	1	1	1	1	1	0	1	1	0	1	1	1	1	1	nocov	1	1	1	1
O. sativa	IRIS_313-11524	GJ-trp	GJ-trop1	0	1	0	1	0	nocov	0	0	0	1	0	0	1	0	0	0	0	0	0	0	0	0	0	0	0	1	0	1	0	nocov	0	0	0	nocov	0	1	0	nocov	0	nocov	0	nocov	0	0	0	0
O. sativa	IRIS_313-11525	XI-3	XI-3B1	1	1	1	0	1	1	1	1	1	1	1	1	1	1	1	1	0	1	1	1	1	1	1	1	1	1	1	1	1	1	1	1	1	1	1	0	1	1	nocov	nocov	1	nocov	1	1	1	1
O. sativa	IRIS_313-11526	GJ-trp	GJ-trop1	0	1	0	1	0	nocov	0	0	0	1	0	0	1	0	0	0	0	0	nocov	0	0	0	0	0	1	1	nocov	1	0	nocov	0	0	0	nocov	0	1	0	0	0	0	0	0	0	0	0	0
O. sativa	IRIS_313-11527	GJ-trp	GJ-trop1	nocov	0	1	1	0	nocov	0	0	0	0	0	0	1	0	0	0	0	0	nocov	0	1	0	0	0	0	0	nocov	1	0	nocov	0	0	0	nocov	0	1	0	0	0	nocov	0	0	1	0	0	0
O. sativa	IRIS_313-11528	XI-3	XI-3B1	1	nocov	1	0	1	1	1	1	1	1	1	1	1	1	1	1	0	1	1	1	1	1	1	1	1	1	1	1	1	1	1	0	1	1	0	0	1	1	1	1	1	1	1	1	1	1
O. sativa	IRIS_313-11530	XI-3	XI-3B1	1	1	1	0	1	1	1	1	1	1	1	1	1	1	1	1	0	1	1	1	1	1	1	1	1	1	1	1	1	1	1	1	1	1	0	0	1	0	1	1	1	1	0	1	1	1
O. sativa	IRIS_313-11532	GJ-trp	GJ-trop1	0	1	1	1	0	1	0	0	0	1	0	0	1	0	0	0	0	0	nocov	0	0	0	nocov	0	0	1	nocov	1	nocov	nocov	0	0	0	nocov	0	1	0	1	0	0	1	0	1	0	0	0
O. sativa	IRIS_313-11534	XI-3	XI-3A	1	1	1	0	1	1	0	1	1	1	1	1	1	1	1	1	0	1	1	1	1	1	1	1	1	1	1	1	1	1	1	1	0	1	1	0	1	0	1	nocov	1	1	1	1	1	1
O. sativa	IRIS_313-11535	XI-3	XI-3A	1	1	1	1	1	1	1	1	1	1	1	1	1	1	1	1	0	1	1	1	1	1	1	1	1	1	1	1	1	1	1	1	1	1	1	0	1	0	1	1	1	1	1	1	1	1
O. sativa	IRIS_313-11536	GJ-tmp	GJ-temp	0	0	0	1	0	0	0	0	0	0	0	1	1	0	0	0	nocov	0	nocov	0	0	0	nocov	0	0	0	nocov	nocov	0	nocov	0	0	0	nocov	0	1	0	nocov	0	0	nocov	0	0	0	0	0
O. sativa	IRIS_313-11537	GJ-trp	GJ-trop1	0	0	1	1	1	nocov	0	0	0	1	0	0	1	0	0	0	0	0	nocov	0	0	0	nocov	0	0	0	nocov	1	0	nocov	0	0	0	nocov	0	1	0	1	0	nocov	0	0	0	0	0	0
O. sativa	IRIS_313-11538	XI-1B	XI-1B	0	1	1	0	1	nocov	1	1	1	0	1	0	1	1	1	1	0	1	1	1	1	1	0	1	1	1	nocov	1	1	0	1	1	1	1	1	0	1	nocov	1	1	1	0	1	1	0	1
O. sativa	IRIS_313-11539	GJ-trp	GJ-trop1	0	0	1	1	0	nocov	0	0	0	1	0	0	1	0	0	0	0	0	nocov	0	0	0	nocov	0	0	1	nocov	1	0	nocov	0	0	0	nocov	0	1	0	1	0	0	1	0	0	0	0	0
O. sativa	IRIS_313-11540	GJ-trp	GJ-trop1	0	1	0	1	0	1	0	0	0	0	0	0	1	0	0	0	0	0	nocov	0	0	0	0	0	0	0	nocov	1	0	nocov	0	0	0	nocov	0	1	0	0	0	nocov	0	0	nocov	0	0	0
O. sativa	IRIS_313-11541	XI-adm	XI-adm	1	1	1	0	1	1	1	1	1	1	1	1	1	1	1	1	1	1	1	1	1	1	1	1	1	1	1	1	1	1	1	1	1	1	1	0	1	1	1	1	1	1	1	0	1	1
O. sativa	IRIS_313-11542	admix	admix	0	1	1	0	1	1	0	nocov	0	0	1	0	1	1	0	0	0	0	nocov	1	0	0	nocov	0	0	0	nocov	1	0	0	0	0	0	nocov	0	1	nocov	nocov	1	nocov	nocov	nocov	0	nocov	0	0
O. sativa	IRIS_313-11543	XI-3	XI-3B1	1	0	1	0	1	1	1	1	1	1	1	1	1	1	1	1	0	1	1	1	1	1	1	1	1	1	1	1	1	1	1	0	0	1	1	0	1	1	1	1	1	1	1	1	1	1
O. sativa	IRIS_313-11544	XI-adm	XI-3B	1	0	1	0	1	1	1	1	1	1	1	1	1	1	1	1	0	1	1	1	1	1	1	1	1	1	1	1	1	1	1	1	1	nocov	1	0	1	1	1	1	1	1	0	1	1	1
O. sativa	IRIS_313-11545	XI-adm	XI-3B	1	0	1	0	1	1	1	1	1	1	1	1	1	1	1	1	nocov	1	1	1	1	1	1	1	1	1	1	1	1	1	1	1	1	nocov	1	0	1	1	1	1	1	1	0	1	1	1
O. sativa	IRIS_313-11546	XI-adm	XI-adm	1	1	1	0	1	1	1	1	1	1	1	1	1	1	1	1	1	1	1	1	1	1	1	1	1	1	1	1	1	1	1	1	1	1	1	0	1	1	1	1	1	1	1	1	1	1
O. sativa	IRIS_313-11547	XI-adm	XI-3	1	1	1	0	1	1	1	1	1	1	1	1	1	1	1	1	0	1	1	1	1	1	1	1	1	1	1	1	1	1	1	1	0	1	nocov	0	0	1	1	1	1	0	1	1	1	1
O. sativa	IRIS_313-11548	XI-adm	XI-adm	1	1	1	0	1	1	1	1	1	1	1	1	1	1	1	1	1	1	1	1	1	1	0	1	1	1	1	1	1	1	1	1	1	1	1	0	1	1	1	1	1	nocov	1	1	1	1
O. sativa	IRIS_313-11549	XI-adm	XI-adm	nocov	1	1	0	1	1	1	1	1	1	1	1	1	nocov	1	1	1	1	1	1	1	1	1	1	1	1	1	1	1	1	1	1	1	nocov	nocov	0	1	1	1	1	1	nocov	1	1	1	1
O. sativa	IRIS_313-11551	XI-3	XI-3	1	1	1	0	1	1	1	1	1	1	1	1	1	1	1	1	0	1	1	nocov	1	1	nocov	1	1	0	1	1	1	1	0	0	0	nocov	1	0	1	nocov	1	nocov	1	0	1	1	1	1
O. sativa	IRIS_313-11554	XI-3	XI-3A	1	1	1	0	1	1	1	1	1	1	1	1	1	1	1	1	0	1	1	1	1	1	1	1	1	1	1	1	1	1	1	1	1	1	0	0	1	0	1	nocov	1	0	1	1	1	1
O. sativa	IRIS_313-11555	XI-adm	XI-adm	1	1	1	0	1	1	1	1	1	1	1	1	1	1	1	1	0	1	1	1	1	1	1	1	1	1	1	1	1	1	1	0	1	1	nocov	0	1	0	1	1	1	1	1	1	1	1
O. sativa	IRIS_313-11556	XI-3	XI-3A	1	1	1	0	1	1	1	1	1	1	1	1	1	1	1	1	0	1	1	1	1	1	1	0	1	1	1	1	1	1	1	1	1	1	0	0	1	0	1	1	1	0	1	1	1	1
O. sativa	IRIS_313-11557	cA(Aus)	cA2	1	1	1	0	1	1	1	1	1	0	1	nocov	1	1	1	1	1	0	nocov	1	1	0	0	1	0	0	nocov	1	0	0	0	0	0	nocov	nocov	0	0	0	1	nocov	1	1	0	1	0	0
O. sativa	IRIS_313-11558	XI-2	XI-2A	1	0	1	0	1	1	1	1	1	1	1	1	1	1	1	1	1	1	1	1	1	1	1	1	1	1	nocov	1	1	1	0	1	1	1	1	0	0	0	1	nocov	1	1	1	1	0	1
O. sativa	IRIS_313-11561	XI-2	XI-2	1	0	1	0	1	1	1	1	1	1	1	1	1	1	1	1	1	1	1	1	1	1	1	1	1	0	1	1	1	1	1	1	1	1	1	0	0	1	1	nocov	1	1	0	1	0	1
O. sativa	IRIS_313-11563	XI-2	XI-2	1	0	1	0	1	1	1	1	1	1	1	1	1	nocov	1	1	1	1	1	1	1	1	1	1	1	1	1	1	1	1	1	1	1	nocov	1	0	0	1	0	1	1	1	1	1	0	1
O. sativa	IRIS_313-11564	cB(Bas)	cB	nocov	1	0	1	0	nocov	0	0	0	0	0	0	nocov	1	1	0	0	1	nocov	0	0	0	0	0	0	0	nocov	1	0	nocov	nocov	0	0	nocov	0	0	0	0	1	0	nocov	0	0	0	0	0
O. sativa	IRIS_313-11565	XI-2	XI-2	1	0	1	0	1	1	1	1	1	1	1	1	1	1	1	1	1	1	1	1	1	1	1	1	1	1	1	1	1	1	1	1	1	1	1	0	0	1	1	nocov	1	1	0	1	0	1
O. sativa	IRIS_313-11566	XI-2	XI-2	1	1	1	0	1	1	1	1	1	1	1	1	1	1	1	1	1	1	1	1	1	1	1	1	1	1	1	1	1	1	1	1	1	1	1	0	0	1	1	nocov	1	1	1	1	0	1
O. sativa	IRIS_313-11567	cB(Bas)	cB	1	0	1	1	0	nocov	0	0	0	0	0	0	nocov	1	1	0	0	0	nocov	0	0	0	0	0	0	0	nocov	1	0	0	0	0	0	nocov	0	1	0	0	1	nocov	nocov	0	0	0	0	0
O. sativa	IRIS_313-11568	XI-1A	XI-1A	1	1	1	0	1	1	1	1	1	1	1	1	1	1	1	1	1	1	1	1	1	1	1	1	1	1	1	1	1	1	1	1	0	1	1	0	0	1	1	nocov	1	1	1	1	1	1
O. sativa	IRIS_313-11570	XI-adm	XI-1	1	1	1	0	1	1	1	1	1	1	1	1	1	nocov	1	1	1	1	1	1	1	1	1	1	1	1	1	1	1	1	1	1	1	1	1	0	0	1	1	1	1	1	1	1	1	1
O. sativa	IRIS_313-11571	GJ-tmp	GJ-temp	0	0	0	1	0	nocov	0	0	0	0	0	1	1	0	0	0	0	0	nocov	0	0	0	0	0	0	0	nocov	nocov	0	nocov	0	0	0	nocov	1	1	0	0	1	0	nocov	0	0	0	0	0
O. sativa	IRIS_313-11572	XI-1A	XI-3B	1	1	1	0	1	1	1	1	1	1	1	1	1	1	1	1	0	1	1	0	1	1	1	1	1	1	1	1	1	1	1	0	0	1	1	0	1	1	1	1	1	nocov	1	1	1	1
O. sativa	IRIS_313-11573	XI-adm	XI-3B	1	1	1	0	1	1	1	1	1	1	1	1	1	1	1	1	1	1	1	1	1	1	1	1	1	1	1	1	1	1	1	1	1	1	1	0	0	0	1	nocov	1	nocov	1	1	1	1
O. sativa	IRIS_313-11574	GJ-tmp	GJ-temp	0	0	0	1	0	nocov	0	0	0	0	0	0	1	0	0	0	0	0	nocov	0	0	0	nocov	0	0	0	nocov	nocov	0	nocov	nocov	0	0	nocov	0	1	0	0	1	0	nocov	0	0	0	0	0
O. sativa	IRIS_313-11575	GJ-tmp	GJ-temp	0	0	1	1	0	nocov	0	0	0	0	0	0	1	0	1	0	1	0	nocov	0	0	0	0	0	0	0	nocov	0	0	nocov	0	0	0	nocov	0	1	0	0	0	nocov	0	0	0	0	0	0
O. sativa	IRIS_313-11576	XI-adm	XI-3B2	1	1	1	0	1	1	1	1	1	1	1	1	1	1	1	1	0	1	1	1	1	1	1	1	1	1	1	1	1	1	0	1	0	1	1	0	1	1	1	1	1	1	1	1	1	1
O. sativa	IRIS_313-11577	XI-1A	XI-3B	1	1	1	0	1	1	1	1	1	1	1	1	1	1	1	1	1	1	1	1	1	1	1	1	1	1	1	1	1	1	0	1	1	1	1	0	0	0	1	nocov	1	nocov	1	1	1	1
O. sativa	IRIS_313-11578	GJ-tmp	GJ-temp	0	0	nocov	1	0	nocov	0	0	0	0	0	0	1	nocov	0	0	0	0	0	0	0	0	0	0	0	0	0	nocov	0	nocov	0	nocov	0	nocov	0	1	0	0	1	nocov	0	nocov	0	nocov	0	0
O. sativa	IRIS_313-11579	XI-1A	XI-1A	1	1	1	0	1	nocov	1	1	1	1	1	1	1	1	1	1	1	1	1	1	1	1	1	1	1	1	1	1	1	1	0	1	1	1	1	0	0	1	1	nocov	1	1	1	1	1	1
O. sativa	IRIS_313-11580	XI-adm	XI-3B2	1	1	1	0	1	1	1	1	1	1	1	1	1	1	0	1	1	1	1	1	1	1	1	1	1	1	1	1	1	1	0	1	1	1	1	0	1	1	1	1	1	1	1	1	1	1
O. sativa	IRIS_313-11582	GJ-tmp	GJ-temp	0	0	0	1	0	nocov	0	0	0	0	1	0	1	nocov	0	0	0	0	0	0	0	0	0	0	0	0	0	nocov	1	nocov	0	0	0	nocov	0	1	0	0	1	nocov	0	0	0	0	0	0
O. sativa	IRIS_313-11584	GJ-tmp	GJ-temp	nocov	nocov	0	1	0	nocov	nocov	0	0	0	0	nocov	1	nocov	0	0	0	0	0	0	0	0	0	0	0	0	0	nocov	0	nocov	0	nocov	0	nocov	0	1	0	0	1	nocov	nocov	0	0	0	0	0
O. sativa	IRIS_313-11585	XI-1A	XI-1A	nocov	1	1	0	1	1	1	1	1	1	1	1	1	nocov	1	1	1	1	1	0	1	1	1	1	1	1	1	1	1	1	1	1	1	1	1	0	0	1	1	1	1	1	1	1	0	1
O. sativa	IRIS_313-11586	GJ-tmp	GJ-temp	0	0	0	1	0	nocov	0	0	0	0	0	0	1	0	0	0	0	0	nocov	0	0	0	0	0	0	0	nocov	1	0	nocov	0	0	0	nocov	0	1	0	0	0	nocov	nocov	0	0	0	0	0
O. sativa	IRIS_313-11588	XI-3	XI-3A	1	1	1	0	1	nocov	1	1	1	1	1	1	1	nocov	1	1	0	1	1	1	1	1	1	1	1	1	1	1	1	1	1	1	1	nocov	nocov	0	1	0	1	1	1	nocov	1	nocov	1	1
O. sativa	IRIS_313-11591	admix	admix	0	1	1	0	1	1	1	1	1	0	0	0	1	1	0	1	0	1	1	0	1	1	0	0	1	0	nocov	1	1	1	1	1	1	1	1	0	0	0	1	nocov	1	0	1	1	0	1
O. sativa	IRIS_313-11594	XI-adm	XI-3B2	1	1	1	0	1	1	1	1	1	1	1	1	1	1	1	1	0	1	1	1	1	1	1	1	1	1	1	1	1	1	1	1	1	1	1	0	1	0	1	0	0	1	1	1	1	1
O. sativa	IRIS_313-11595	cA(Aus)	cA1	1	1	1	0	1	1	1	1	0	0	0	1	1	1	1	1	1	0	nocov	1	1	1	nocov	0	0	0	nocov	1	1	0	0	0	0	0	nocov	0	1	0	1	nocov	1	0	nocov	1	0	0
O. sativa	IRIS_313-11596	XI-adm	admix	1	1	1	0	1	1	1	1	1	0	1	1	1	1	1	1	1	0	1	1	1	1	1	1	1	0	nocov	1	1	0	0	0	1	1	0	0	0	0	1	nocov	1	1	1	1	0	1
O. sativa	IRIS_313-11597	XI-2	XI-2B	1	0	1	0	1	1	1	1	1	1	1	1	1	nocov	1	1	1	0	1	1	1	1	1	1	1	1	1	1	1	1	1	1	1	nocov	0	0	0	1	1	nocov	1	1	1	1	1	1
O. sativa	IRIS_313-11598	admix	admix	1	1	1	0	1	1	1	1	1	1	1	1	1	1	1	1	1	1	1	1	1	1	0	0	1	1	nocov	1	1	1	1	1	1	1	nocov	0	1	1	1	nocov	1	1	1	1	1	1
O. sativa	IRIS_313-11599	XI-2	XI-2	1	1	1	0	1	1	1	1	1	1	1	1	1	1	1	1	0	1	1	1	1	1	1	1	1	1	1	1	1	1	1	1	1	1	0	0	1	1	1	1	1	nocov	1	0	1	1
O. sativa	IRIS_313-11600	XI-2	XI-2B	1	0	1	0	1	1	1	1	1	1	1	1	1	nocov	1	1	1	1	1	1	1	1	1	1	1	1	1	1	1	1	1	1	1	nocov	0	0	0	1	1	nocov	1	1	1	1	1	1
O. sativa	IRIS_313-11602	cA(Aus)	cA1	1	1	1	0	1	1	1	1	1	0	1	1	1	nocov	1	1	1	0	0	1	1	1	0	0	0	0	0	1	1	1	0	0	0	nocov	nocov	0	1	0	1	nocov	0	1	1	1	0	0
O. sativa	IRIS_313-11603	cA(Aus)	cA-adm	1	1	1	0	1	1	1	1	0	0	0	nocov	1	1	1	1	1	0	nocov	1	1	1	0	0	0	0	nocov	1	1	0	0	0	0	0	nocov	0	1	0	0	nocov	1	1	0	1	0	1
O. sativa	IRIS_313-11604	cA(Aus)	cA-adm	1	1	1	0	1	nocov	1	1	1	0	0	nocov	1	0	1	1	1	0	1	0	1	1	0	1	0	0	nocov	1	1	0	1	0	0	0	nocov	0	1	0	0	nocov	0	1	1	1	0	0
O. sativa	IRIS_313-11606	XI-2	XI-2B	1	1	1	0	1	1	1	1	1	1	1	1	1	nocov	1	1	1	1	1	1	1	1	1	1	1	1	1	1	1	1	1	1	0	nocov	1	0	0	1	1	1	1	nocov	1	1	1	1
O. sativa	IRIS_313-11607	XI-2	XI-2	1	1	1	0	1	1	1	1	1	1	1	1	1	1	1	1	1	1	1	1	1	1	1	1	1	1	1	1	1	1	1	1	0	1	1	0	1	1	1	nocov	1	1	1	1	0	1
O. sativa	IRIS_313-11608	XI-3	XI-3A	1	1	1	0	1	1	1	1	1	1	1	1	1	1	1	1	0	1	1	1	1	1	1	1	1	1	1	1	1	1	1	1	0	1	1	0	1	nocov	1	nocov	1	nocov	1	1	1	1
O. sativa	IRIS_313-11609	XI-3	XI-3A	1	1	1	0	1	1	1	1	1	1	1	1	1	1	1	1	0	1	1	1	1	1	1	1	1	1	nocov	1	1	1	1	1	0	1	0	0	1	0	1	nocov	1	nocov	1	1	1	1
O. sativa	IRIS_313-11610	XI-3	XI-3A	1	1	1	0	1	1	1	1	1	nocov	1	1	1	nocov	1	1	0	1	1	1	1	1	1	1	1	1	1	1	1	1	1	1	1	1	nocov	0	0	0	1	nocov	1	0	1	1	1	1
O. sativa	IRIS_313-11611	GJ-trp	GJ-trop1	0	1	1	1	0	nocov	0	0	0	1	0	0	1	0	0	0	0	0	nocov	1	0	0	0	0	0	0	1	1	0	nocov	0	0	0	nocov	0	1	0	1	0	nocov	1	0	1	0	0	0
O. sativa	IRIS_313-11615	XI-3	XI-3B1	1	1	1	0	1	1	1	1	1	1	1	1	1	1	1	1	0	1	1	1	1	1	1	1	1	1	1	1	1	1	1	1	1	1	0	0	1	1	1	nocov	1	nocov	1	1	1	1
O. sativa	IRIS_313-11616	admix	admix	1	1	1	0	1	1	1	1	1	0	1	1	1	1	1	1	1	1	nocov	1	1	1	0	1	0	1	0	1	1	1	1	1	1	1	nocov	0	nocov	0	1	1	1	1	1	1	1	0
O. sativa	IRIS_313-11617	cA(Aus)	cA1	1	1	1	0	1	nocov	1	1	1	0	0	1	1	0	1	1	1	0	1	1	1	0	0	0	0	0	nocov	1	1	0	1	0	0	0	nocov	0	1	0	1	nocov	1	1	1	1	1	0
O. sativa	IRIS_313-11618	cA(Aus)	cA1	1	1	1	0	1	nocov	1	1	1	1	0	1	1	1	1	1	1	0	1	1	1	1	0	1	0	0	nocov	1	1	0	1	0	0	1	nocov	0	1	0	1	nocov	1	1	1	1	0	0
O. sativa	IRIS_313-11619	cA(Aus)	cA1	1	1	1	0	1	nocov	1	1	1	0	0	1	1	1	1	1	1	0	1	1	1	0	0	0	0	0	nocov	1	1	0	0	0	0	1	nocov	0	0	0	1	nocov	1	1	1	1	0	1
O. sativa	IRIS_313-11620	cA(Aus)	cA1	1	1	1	0	1	nocov	1	1	1	0	0	1	1	1	1	1	1	0	1	1	1	1	0	1	0	0	nocov	1	1	0	0	0	0	1	nocov	0	1	0	1	nocov	1	1	1	1	1	0
O. sativa	IRIS_313-11621	XI-adm	XI-adm	1	1	1	0	1	1	1	1	1	1	1	1	1	1	0	1	0	1	1	1	1	1	1	1	1	1	1	1	1	1	1	1	1	1	1	0	1	0	1	1	0	0	1	1	1	1
O. sativa	IRIS_313-11622	XI-1A	XI-1A	1	1	1	0	1	1	1	1	1	1	1	1	1	1	1	1	1	1	1	1	1	1	1	1	1	1	1	1	1	1	1	1	1	1	1	0	0	1	1	1	1	1	1	1	0	1
O. sativa	IRIS_313-11623	GJ-sbtrp	GJ-subtrp	1	1	0	1	0	nocov	nocov	0	0	0	0	0	1	0	0	1	0	0	nocov	0	0	0	0	0	0	0	nocov	1	0	nocov	0	0	0	nocov	0	1	0	0	1	0	nocov	0	0	0	0	0
O. sativa	IRIS_313-11624	XI-1A	XI-1A	1	1	1	0	1	1	1	1	1	1	1	1	1	1	1	1	1	1	1	1	1	1	1	1	1	1	1	1	1	1	1	1	0	1	0	0	0	1	1	nocov	1	1	1	1	1	1
O. sativa	IRIS_313-11625	cB(Bas)	cB	1	0	0	1	0	nocov	0	0	0	0	0	0	nocov	0	1	0	0	0	nocov	0	0	0	0	0	0	0	nocov	1	0	0	1	0	0	nocov	1	0	0	0	1	nocov	1	0	0	0	0	0
O. sativa	IRIS_313-11626	cB(Bas)	cB	1	0	0	1	0	nocov	0	0	0	0	0	0	nocov	1	1	0	0	0	nocov	0	0	0	0	0	0	0	nocov	0	0	nocov	1	0	0	nocov	0	1	1	0	0	0	0	0	0	1	0	0
O. sativa	IRIS_313-11627	cB(Bas)	cB	1	1	1	1	0	nocov	0	0	0	0	0	0	nocov	nocov	1	0	0	0	0	0	0	0	0	0	0	0	0	1	0	nocov	0	nocov	0	nocov	0	0	0	0	1	nocov	1	nocov	0	1	0	0
O. sativa	IRIS_313-11628	admix	admix	1	1	1	1	1	1	1	1	1	1	1	1	1	1	1	1	1	1	1	1	1	1	0	1	1	1	nocov	1	1	1	1	1	1	1	1	0	0	1	1	1	1	1	1	1	0	1
O. sativa	IRIS_313-11629	cA(Aus)	cA1	1	1	1	0	1	1	1	1	1	0	0	nocov	1	1	1	1	1	0	1	1	1	1	0	0	0	0	nocov	1	1	0	0	0	0	1	nocov	0	0	1	1	nocov	1	1	1	1	0	1
O. sativa	IRIS_313-11630	cB(Bas)	cB	1	0	0	1	0	nocov	0	0	0	0	0	0	1	0	1	0	0	0	nocov	0	0	0	0	0	0	0	nocov	1	0	0	1	0	0	nocov	0	0	0	0	1	nocov	1	1	0	0	0	0
O. sativa	IRIS_313-11632	cB(Bas)	cB	1	1	1	1	0	nocov	nocov	0	0	0	0	0	nocov	1	1	0	0	0	nocov	0	0	0	0	0	0	0	nocov	1	0	0	1	0	0	nocov	0	0	0	0	0	0	1	0	0	0	0	0
O. sativa	IRIS_313-11635	XI-3	XI-3B1	1	0	1	0	1	1	1	1	1	1	1	1	1	1	1	1	0	1	1	1	1	1	1	1	1	1	1	1	1	1	1	1	1	1	1	0	1	0	1	1	1	1	1	1	1	1
O. sativa	IRIS_313-11636	cA(Aus)	cA-adm	1	1	1	0	1	1	1	1	1	0	1	1	1	1	1	1	1	1	1	1	1	1	0	0	0	0	nocov	1	0	0	nocov	0	0	0	0	0	1	0	0	nocov	1	nocov	1	1	0	1
O. sativa	IRIS_313-11638	XI-2	XI-2B	1	1	1	0	1	1	1	1	1	1	1	1	1	1	1	1	1	1	1	1	1	1	1	1	1	1	1	1	1	1	1	0	1	1	nocov	0	0	1	1	nocov	1	1	1	1	1	1
O. sativa	IRIS_313-11639	XI-adm	XI-1	1	1	1	0	1	1	1	1	1	1	1	1	1	1	1	1	1	1	1	1	1	1	1	1	1	1	1	1	1	1	1	1	1	1	1	0	1	0	0	1	0	1	1	1	1	1
O. sativa	IRIS_313-11640	XI-2	XI-2B	1	1	1	0	1	1	1	1	1	1	1	1	1	1	1	1	1	1	1	1	1	1	1	1	1	1	1	1	1	1	1	1	0	nocov	nocov	0	0	1	1	1	1	1	1	1	1	1
O. sativa	IRIS_313-11641	XI-2	XI-2	1	1	1	0	1	1	1	1	1	1	1	1	1	1	1	1	1	1	1	1	1	1	1	1	1	1	1	1	1	1	1	1	1	1	1	0	0	1	1	nocov	1	1	1	1	1	1
O. sativa	IRIS_313-11642	XI-2	XI-2B	1	1	1	0	1	1	1	1	1	1	1	1	1	1	1	1	1	1	1	1	1	1	1	1	1	1	1	1	1	1	1	1	1	nocov	1	0	0	1	1	0	1	1	1	1	1	1
O. sativa	IRIS_313-11643	XI-1B	XI-1B2	1	1	1	0	1	1	1	1	1	1	1	1	1	1	1	1	1	0	1	1	1	1	0	1	1	1	1	1	1	1	1	1	0	1	1	0	0	0	1	1	1	1	1	1	1	1
O. sativa	IRIS_313-11644	XI-2	XI-2B	1	0	1	0	1	1	1	1	0	1	0	1	1	1	1	1	1	1	1	1	1	1	1	1	1	1	1	1	1	1	0	0	1	1	0	0	0	1	1	nocov	1	nocov	1	1	1	1
O. sativa	IRIS_313-11645	XI-2	XI-2B	1	1	1	0	1	1	1	1	1	1	1	1	1	1	1	1	1	1	1	1	1	1	1	1	1	0	1	1	1	1	1	1	1	1	0	0	0	1	1	nocov	1	nocov	1	1	1	1
O. sativa	IRIS_313-11646	XI-2	XI-2A	1	1	1	0	1	1	1	1	1	1	1	1	1	1	1	1	1	1	1	1	1	1	1	1	1	1	1	1	1	1	1	1	1	1	1	0	1	1	1	1	1	1	1	1	1	1
O. sativa	IRIS_313-11647	XI-2	XI-2B	1	1	1	0	1	1	1	1	0	1	1	1	1	1	1	1	1	1	1	1	1	1	1	1	1	1	1	1	1	1	1	1	1	nocov	0	0	0	1	1	1	1	1	1	1	1	1
O. sativa	IRIS_313-11648	XI-2	XI-2	1	1	1	0	1	1	1	1	1	1	1	1	1	1	1	1	1	1	1	1	1	1	1	1	1	1	1	1	1	1	1	1	1	1	0	0	0	1	1	0	1	1	1	1	1	1
O. sativa	IRIS_313-11650	XI-2	XI-2	1	1	0	0	1	1	1	nocov	1	1	1	1	1	1	1	0	1	0	1	1	0	1	1	1	1	1	1	1	1	1	1	1	1	nocov	0	0	0	0	0	1	nocov	1	1	1	0	0
O. sativa	IRIS_313-11651	GJ-tmp	GJ-temp	0	0	0	1	0	nocov	0	0	0	0	0	0	nocov	0	0	0	0	0	0	0	0	0	0	0	0	0	nocov	0	0	nocov	0	0	0	0	0	1	0	0	0	0	0	0	0	0	0	0
O. sativa	IRIS_313-11652	GJ-tmp	GJ-temp	0	0	0	1	0	nocov	0	0	0	0	0	0	1	0	0	0	0	0	nocov	0	0	0	0	0	0	1	nocov	nocov	1	nocov	0	0	0	0	0	0	0	0	0	0	0	0	0	0	0	0
O. sativa	IRIS_313-11653	GJ-tmp	GJ-temp	0	0	0	1	0	nocov	0	1	0	0	0	0	1	0	0	0	0	0	nocov	0	0	0	0	0	0	0	nocov	0	0	nocov	0	0	0	0	0	1	0	0	0	0	0	0	0	0	0	0
O. sativa	IRIS_313-11654	GJ-tmp	GJ-temp	0	0	0	1	0	nocov	0	0	0	0	0	0	1	0	0	0	0	0	nocov	0	0	0	0	0	0	0	nocov	0	1	nocov	0	0	0	nocov	0	1	0	0	0	nocov	0	0	0	0	0	0
O. sativa	IRIS_313-11655	GJ-tmp	GJ-temp	0	0	1	1	0	nocov	0	0	0	1	0	0	nocov	0	0	0	0	0	0	0	0	0	0	0	0	0	0	nocov	1	nocov	0	0	0	nocov	0	1	0	0	0	nocov	0	0	0	0	0	0
O. sativa	IRIS_313-11656	XI-adm	XI-adm	1	1	1	1	1	1	1	1	1	1	1	1	1	1	0	1	0	0	nocov	1	1	1	1	1	1	1	1	1	1	1	1	1	1	1	1	0	1	0	1	1	1	1	1	1	1	1
O. sativa	IRIS_313-11657	XI-2	XI-2A	1	1	0	0	1	1	1	1	0	1	1	1	1	1	1	1	1	1	1	1	1	1	1	1	1	1	1	nocov	1	1	1	0	1	1	1	0	1	1	1	0	1	1	1	1	1	1
O. sativa	IRIS_313-11658	GJ-trp	GJ-trop1	0	1	0	1	0	1	0	0	0	0	0	0	1	nocov	0	0	0	0	nocov	0	0	0	0	0	0	0	nocov	1	0	nocov	0	0	0	nocov	0	1	0	0	0	0	0	0	0	0	0	0
O. sativa	IRIS_313-11659	GJ-trp	GJ-trop1	0	1	0	1	0	nocov	0	0	0	0	0	0	1	0	0	0	0	0	nocov	0	0	0	0	0	0	0	nocov	1	0	nocov	0	0	0	nocov	0	1	0	0	0	0	0	0	0	0	0	0
O. sativa	IRIS_313-11660	GJ-trp	GJ-trop1	0	0	0	1	0	nocov	0	0	0	nocov	0	0	1	0	0	0	0	0	0	0	0	0	0	0	0	1	nocov	nocov	1	nocov	0	0	0	nocov	0	1	0	0	0	nocov	0	0	0	nocov	0	0
O. sativa	IRIS_313-11661	GJ-tmp	GJ-temp	0	0	0	1	0	nocov	0	0	0	0	0	0	1	0	0	0	0	0	0	0	0	0	0	0	0	1	nocov	0	0	nocov	0	0	0	nocov	0	1	0	0	0	0	0	0	0	0	0	0
O. sativa	IRIS_313-11663	admix	XI-2B	1	0	1	0	1	1	1	1	0	1	1	1	1	1	1	1	1	0	1	1	1	1	0	1	1	1	1	1	1	1	1	0	0	nocov	0	0	0	0	1	nocov	nocov	1	1	0	1	1
O. sativa	IRIS_313-11664	XI-adm	XI-adm	1	1	1	0	1	1	1	1	1	1	1	1	1	1	1	1	0	1	1	1	1	1	1	1	1	1	1	1	1	1	1	1	0	1	1	0	1	1	1	1	1	1	1	1	1	1
O. sativa	IRIS_313-11665	XI-1A	XI-1A	1	1	1	0	1	1	1	1	1	1	1	1	1	1	1	1	1	1	1	1	1	1	1	1	1	1	1	1	1	1	0	1	0	1	1	0	0	1	1	1	1	1	1	1	1	1
O. sativa	IRIS_313-11666	XI-adm	XI-adm	1	1	1	0	1	1	1	1	1	1	1	1	1	1	1	1	1	1	1	1	1	1	1	1	1	1	1	1	1	1	1	0	1	1	1	0	0	1	1	1	1	nocov	1	1	0	1
O. sativa	IRIS_313-11667	XI-1A	XI-1A	1	1	1	0	1	1	1	1	1	1	1	1	1	1	1	1	1	1	1	1	1	1	1	1	1	1	1	1	1	1	1	1	1	1	1	0	0	1	1	1	1	1	1	1	0	1
O. sativa	IRIS_313-11668	XI-1A	XI-1A	1	1	1	0	1	1	1	1	0	1	1	1	1	1	1	1	1	1	1	1	1	1	1	1	1	1	1	1	1	1	1	1	0	1	1	0	0	1	1	1	1	1	1	1	1	1
O. sativa	IRIS_313-11669	XI-adm	XI-adm	1	1	1	1	1	1	1	1	1	1	1	1	1	1	1	1	1	1	1	1	1	1	0	1	1	1	1	1	1	1	0	1	1	1	1	0	1	1	1	1	1	1	1	1	1	1
O. sativa	IRIS_313-11671	XI-2	XI-2	1	1	1	0	1	1	1	1	1	1	1	1	1	1	1	1	1	1	1	1	1	1	1	1	1	1	1	1	1	0	1	1	1	1	0	0	0	1	1	nocov	1	1	1	0	1	1
O. sativa	IRIS_313-11672	GJ-tmp	GJ-temp	0	0	0	1	0	nocov	0	0	0	0	0	0	1	0	0	0	0	0	0	0	0	0	0	0	0	0	nocov	0	0	nocov	0	0	0	nocov	0	1	0	0	0	nocov	0	0	0	0	0	0
O. sativa	IRIS_313-11673	GJ-trp	GJ-trop1	0	0	1	1	0	nocov	0	0	0	1	0	0	1	0	0	0	0	0	nocov	0	0	0	0	0	0	1	nocov	1	0	1	0	0	0	nocov	0	1	0	0	0	0	1	0	0	0	0	0
O. sativa	IRIS_313-11674	XI-3	XI-3B1	1	1	1	0	1	1	1	1	1	1	1	1	1	1	1	1	0	1	1	1	1	1	1	1	1	1	1	1	1	1	1	1	1	nocov	nocov	0	1	0	1	1	1	1	1	1	1	1
O. sativa	IRIS_313-11676	XI-3	XI-3B1	1	0	1	0	1	1	1	1	1	1	1	1	1	1	1	1	0	1	1	1	1	1	1	1	1	1	1	1	1	1	1	1	1	1	1	0	1	0	1	1	1	nocov	1	1	1	1
O. sativa	IRIS_313-11677	XI-3	XI-3B1	1	1	1	0	1	1	1	1	1	1	1	1	1	1	1	1	1	1	1	1	1	1	1	1	1	1	1	1	1	1	0	1	1	1	1	0	0	1	1	1	1	nocov	1	1	1	1
O. sativa	IRIS_313-11678	XI-3	XI-3B1	1	1	1	0	1	1	1	1	1	1	1	1	1	1	1	1	0	1	1	1	1	1	1	1	1	1	1	1	1	1	1	1	1	1	1	0	1	0	1	1	1	nocov	1	1	1	1
O. sativa	IRIS_313-11679	XI-3	XI-3B1	1	1	1	0	1	1	1	1	1	1	1	1	1	1	1	1	0	1	1	1	1	1	1	1	1	1	1	1	1	1	1	0	0	1	1	0	1	0	1	0	1	1	1	0	1	1
O. sativa	IRIS_313-11680	XI-3	XI-3B1	1	nocov	1	0	1	1	1	1	1	1	1	1	1	1	1	1	0	1	1	1	1	1	1	1	1	1	1	1	1	1	1	1	0	nocov	1	0	1	1	1	1	1	1	1	1	1	1
O. sativa	IRIS_313-11681	XI-3	XI-3	1	1	1	0	1	1	1	1	1	1	1	1	1	1	1	1	0	1	1	1	1	1	1	1	1	1	0	1	1	1	1	0	0	0	1	0	0	1	1	0	1	nocov	1	1	0	1
O. sativa	IRIS_313-11682	XI-3	XI-3B1	1	1	1	0	1	1	1	1	1	1	1	1	1	1	1	1	0	1	1	1	1	1	1	1	1	1	1	1	1	1	1	1	1	1	1	0	1	0	1	1	1	nocov	1	1	1	1
O. sativa	IRIS_313-11683	XI-3	XI-3B1	1	1	1	0	1	1	1	1	1	1	1	1	1	1	1	1	0	1	1	1	1	1	1	1	1	1	1	1	1	1	1	0	0	1	1	0	1	0	1	nocov	1	1	1	1	1	1
O. sativa	IRIS_313-11684	XI-3	XI-3B1	1	1	1	0	1	1	1	1	1	1	1	1	1	1	1	1	0	1	1	1	1	1	1	1	1	1	1	1	1	1	1	1	0	1	1	0	1	0	1	1	1	1	1	1	1	1
O. sativa	IRIS_313-11685	XI-3	XI-3B1	1	1	1	0	1	1	1	1	1	1	1	1	1	1	1	1	1	1	1	1	1	1	1	1	1	1	1	1	1	1	1	1	1	1	1	0	1	1	1	1	1	nocov	1	1	1	1
O. sativa	IRIS_313-11686	XI-3	XI-3B1	1	1	1	0	1	1	1	1	1	1	1	1	1	1	1	1	0	1	1	1	1	1	1	1	1	1	1	1	1	1	1	1	1	1	1	0	1	0	1	1	1	1	1	1	1	1
O. sativa	IRIS_313-11687	XI-3	XI-3B1	1	1	1	0	1	1	1	1	1	1	1	1	1	1	1	1	0	1	1	1	1	1	1	1	1	1	1	1	1	1	1	1	0	1	0	0	1	0	1	1	1	1	1	1	1	1
O. sativa	IRIS_313-11688	XI-3	XI-3B1	1	1	1	0	1	1	1	1	1	1	1	1	1	1	1	1	0	1	1	1	1	1	1	1	1	1	1	1	1	1	1	nocov	1	1	nocov	0	1	0	1	nocov	1	1	1	0	1	1
O. sativa	IRIS_313-11689	GJ-tmp	GJ-temp	0	0	0	1	0	nocov	0	0	0	0	0	0	1	0	0	0	0	0	nocov	0	0	0	0	0	0	0	nocov	0	1	0	0	0	0	nocov	0	1	0	0	0	nocov	0	0	0	0	0	0
O. sativa	IRIS_313-11690	admix	admix	0	0	0	0	1	1	1	0	1	0	0	1	1	0	1	1	0	1	1	1	0	1	0	1	1	1	nocov	1	0	1	0	0	0	nocov	1	1	nocov	0	1	1	0	0	0	0	0	0
O. sativa	IRIS_313-11691	GJ-sbtrp	GJ-subtrp	1	0	0	1	0	nocov	0	0	0	0	0	0	1	0	0	0	0	0	0	0	0	0	0	0	0	0	nocov	1	0	nocov	0	0	0	nocov	0	1	nocov	0	1	0	0	0	0	0	1	0
O. sativa	IRIS_313-11692	XI-1A	XI-1A	1	1	1	0	1	1	1	1	1	1	1	1	1	1	1	1	1	1	1	1	1	1	1	1	1	1	1	1	1	1	1	1	1	1	0	0	0	1	1	1	1	1	1	1	0	1
O. sativa	IRIS_313-11693	XI-adm	XI-3B2	1	1	1	0	1	1	1	1	1	1	1	1	1	1	1	1	1	0	1	1	1	1	0	1	1	1	1	1	1	nocov	1	0	1	1	1	0	1	0	1	1	0	0	1	1	1	1
O. sativa	IRIS_313-11694	XI-adm	XI-3B2	1	1	1	0	1	1	1	1	1	1	1	1	1	1	0	1	1	1	1	1	1	1	1	1	1	1	1	1	1	nocov	1	1	1	1	0	0	0	1	1	1	1	nocov	1	1	1	1
O. sativa	IRIS_313-11695	XI-1A	XI-3B	1	1	1	0	1	1	1	1	1	1	1	1	1	1	1	1	1	1	1	1	1	1	0	1	1	1	1	1	1	1	0	1	1	1	nocov	0	1	1	1	1	1	nocov	1	1	1	1
O. sativa	IRIS_313-11698	cB(Bas)	cB	nocov	1	0	1	0	nocov	0	0	0	0	0	0	nocov	1	1	0	0	0	0	0	0	0	0	0	0	0	0	0	1	0	1	0	0	nocov	0	1	0	0	0	nocov	0	0	0	1	0	0
O. sativa	IRIS_313-11700	XI-3	XI-3B1	1	1	1	0	1	1	1	1	1	1	1	1	1	1	1	1	0	1	1	1	1	1	1	1	1	1	1	1	1	1	1	1	1	1	1	0	1	0	1	1	1	1	1	1	1	1
O. sativa	IRIS_313-11702	GJ-tmp	GJ-temp	0	0	0	1	0	nocov	0	0	0	0	0	0	1	nocov	0	0	0	0	nocov	0	0	0	0	0	0	0	nocov	1	1	nocov	0	0	0	nocov	0	1	0	0	0	0	0	0	1	0	0	0
O. sativa	IRIS_313-11704	XI-3	XI-3	1	1	1	0	1	1	1	1	1	1	1	1	1	1	1	1	0	1	1	1	1	1	1	1	1	1	1	1	0	1	1	0	1	0	0	0	0	1	1	1	1	nocov	1	1	0	1
O. sativa	IRIS_313-11705	XI-3	XI-3B1	1	1	1	0	1	1	1	1	1	1	1	1	1	1	1	1	0	1	1	1	1	1	1	1	1	1	1	1	1	1	1	1	1	1	1	0	0	0	1	1	1	nocov	1	1	1	1
O. sativa	IRIS_313-11706	XI-3	XI-3A	1	0	1	0	1	1	1	1	1	1	1	1	1	1	1	1	0	1	1	1	1	1	1	1	1	1	1	1	1	1	1	1	1	1	0	0	1	0	1	1	0	1	1	1	1	1
O. sativa	IRIS_313-11707	XI-3	XI-3B1	1	1	1	0	1	1	1	1	1	1	1	1	1	1	1	1	0	1	1	1	1	1	1	1	1	1	1	1	1	1	1	1	0	1	1	0	1	0	1	1	1	1	1	1	1	1
O. sativa	IRIS_313-11708	XI-3	XI-3B1	1	1	1	0	1	1	1	1	1	1	1	1	1	1	1	1	0	1	1	1	1	1	1	1	1	1	1	1	1	1	1	0	0	1	nocov	0	1	0	1	nocov	1	1	1	1	1	1
O. sativa	IRIS_313-11709	XI-3	XI-3B1	1	1	1	0	1	0	1	1	1	1	1	1	1	1	1	1	0	1	1	1	1	1	1	1	1	1	1	1	1	1	1	1	0	nocov	0	0	1	0	1	1	1	0	1	0	1	1
O. sativa	IRIS_313-11710	XI-3	XI-3B1	1	1	1	0	1	1	1	1	1	1	1	1	1	1	1	1	0	1	1	1	1	1	1	1	1	1	1	1	1	1	1	1	1	1	1	0	1	0	1	1	1	nocov	1	1	1	1
O. sativa	IRIS_313-11711	XI-3	XI-3B1	1	1	1	0	1	1	1	1	1	1	1	1	1	1	1	1	0	1	1	1	1	1	1	1	1	1	1	1	1	1	1	1	1	nocov	1	0	1	0	1	1	1	1	1	1	1	1
O. sativa	IRIS_313-11712	cA(Aus)	cA1	1	1	1	0	1	1	1	1	1	0	1	1	1	1	1	1	1	0	1	1	1	1	0	0	0	0	0	1	1	0	0	0	0	1	nocov	0	1	0	1	nocov	1	1	1	1	0	0
O. sativa	IRIS_313-11713	XI-3	XI-3A	1	nocov	1	0	1	1	1	1	1	1	1	1	1	1	0	1	1	1	1	1	1	1	0	1	0	1	1	1	1	1	1	1	0	1	1	0	1	0	1	nocov	1	0	1	1	1	1
O. sativa	IRIS_313-11714	XI-adm	XI-1	1	1	1	0	1	1	1	0	1	1	1	1	1	1	1	0	1	1	1	1	0	1	1	0	1	1	1	nocov	1	nocov	nocov	1	1	nocov	0	0	0	0	0	nocov	1	1	1	1	1	1
O. sativa	IRIS_313-11716	XI-3	XI-3B	1	1	1	0	1	1	1	1	1	1	1	1	1	1	0	1	1	1	1	1	1	1	1	1	1	1	1	1	1	1	1	0	0	nocov	1	0	1	0	1	0	1	nocov	1	1	1	1
O. sativa	IRIS_313-11717	XI-adm	XI-adm	1	0	1	0	1	1	1	1	1	1	1	1	1	1	0	1	0	0	1	1	1	1	1	1	1	1	1	1	1	1	1	1	0	1	1	0	1	0	1	1	1	0	1	1	1	1
O. sativa	IRIS_313-11719	XI-3	XI-3B1	1	1	1	0	1	1	1	1	1	1	1	1	1	1	1	1	0	1	1	1	1	1	1	1	1	1	1	1	1	1	1	1	1	1	1	0	1	0	1	1	1	1	0	1	1	1
O. sativa	IRIS_313-11720	XI-3	XI-3B1	1	1	1	0	1	1	1	1	1	1	1	1	1	1	1	1	0	1	1	1	1	1	1	1	1	1	1	1	1	1	1	0	1	nocov	1	0	1	0	1	nocov	1	1	1	1	1	1
O. sativa	IRIS_313-11721	XI-3	XI-3B1	1	1	1	0	1	1	1	1	1	1	1	1	1	1	1	1	0	1	1	1	1	1	1	1	1	1	1	1	1	1	1	1	1	1	1	0	1	0	1	1	1	0	1	1	1	1
O. sativa	IRIS_313-11722	XI-adm	XI-adm	1	1	1	0	1	1	1	1	1	1	1	1	1	1	1	1	1	1	1	1	1	1	1	1	1	1	1	1	1	1	0	1	1	1	1	0	1	0	1	1	0	1	1	1	0	1
O. sativa	IRIS_313-11723	XI-2	XI-2A	1	0	1	0	1	1	1	1	1	1	1	1	1	1	1	1	1	1	1	1	1	1	1	1	1	1	1	1	1	1	1	1	1	1	1	0	0	1	1	0	1	1	1	1	1	1
O. sativa	IRIS_313-11724	XI-3	XI-3B	1	1	1	0	1	1	1	1	1	1	1	1	1	1	1	1	0	1	1	1	1	1	1	1	1	1	1	1	1	1	1	0	1	1	1	0	1	1	1	nocov	1	1	1	1	1	1
O. sativa	IRIS_313-11725	GJ-tmp	GJ-temp	0	0	0	1	0	nocov	0	1	0	0	0	0	1	0	0	0	0	0	0	0	0	0	0	0	0	0	0	0	0	0	0	0	0	nocov	0	1	0	0	0	nocov	0	0	0	0	0	0
O. sativa	IRIS_313-11726	XI-1A	XI-3B2	1	1	1	0	1	1	1	1	1	1	1	1	1	1	1	1	0	1	1	0	1	1	1	1	1	1	1	1	1	1	1	1	1	1	1	0	1	0	1	1	1	nocov	1	1	1	1
O. sativa	IRIS_313-11727	XI-1A	XI-1A	1	1	1	0	1	1	1	1	1	1	1	1	1	1	1	1	1	1	1	1	1	1	1	1	1	1	1	1	1	1	1	1	1	1	1	0	0	1	1	1	1	1	1	1	1	1
O. sativa	IRIS_313-11728	XI-3	XI-3B	1	1	1	0	1	1	1	1	1	1	1	1	1	1	1	1	1	1	1	1	1	1	1	1	1	1	1	1	1	1	1	1	0	1	1	0	1	0	1	1	1	1	1	1	1	1
O. sativa	IRIS_313-11729	XI-adm	XI-1	1	1	1	0	1	1	1	1	1	1	1	1	1	1	1	1	0	0	1	1	1	1	1	1	1	1	1	1	1	1	1	1	1	1	nocov	0	1	1	1	1	1	1	1	1	1	1
O. sativa	IRIS_313-11730	XI-adm	XI-1	1	1	1	0	1	1	1	1	1	1	1	1	1	1	1	1	0	1	1	1	1	1	0	1	1	1	1	1	1	nocov	1	1	1	1	1	0	1	0	1	1	1	0	1	1	1	1
O. sativa	IRIS_313-11731	XI-adm	XI-1	1	1	1	0	1	1	1	1	1	1	1	1	1	1	1	1	0	1	1	1	1	1	1	1	1	1	1	1	1	1	0	1	1	nocov	1	0	0	1	1	1	1	1	1	1	1	1
O. sativa	IRIS_313-11732	XI-1A	XI-1A	1	1	1	0	1	1	1	1	1	1	1	1	1	1	1	1	1	1	1	1	1	1	1	1	1	1	1	1	1	1	1	1	1	1	1	0	0	1	1	1	1	1	1	1	1	1
O. sativa	IRIS_313-11733	XI-1A	XI-1A	1	1	1	0	1	1	1	1	1	1	1	1	1	1	1	1	1	1	1	1	1	1	0	1	1	1	1	1	1	1	1	0	1	1	1	0	0	1	1	1	1	1	1	1	1	1
O. sativa	IRIS_313-11734	XI-1A	XI-1A	1	1	1	0	1	1	1	1	1	1	1	1	1	1	1	1	1	1	1	1	1	1	1	1	1	1	1	1	1	1	0	1	1	1	1	0	0	1	1	1	1	1	1	1	1	1
O. sativa	IRIS_313-11735	XI-adm	XI-3B2	1	1	1	0	1	1	1	1	1	1	1	1	1	1	1	1	0	0	1	1	1	1	1	1	1	1	1	1	1	nocov	0	1	0	1	nocov	0	1	0	1	nocov	1	1	1	1	1	1
O. sativa	IRIS_313-11736	GJ-trp	GJ-trop1	0	1	0	1	0	nocov	0	0	0	0	0	0	1	0	0	0	0	0	0	0	0	0	0	0	0	1	0	1	0	nocov	0	0	0	nocov	0	1	0	0	0	0	1	0	0	0	0	0
O. sativa	IRIS_313-11737	cA(Aus)	cA1	1	1	1	0	1	1	1	1	1	0	0	1	1	1	1	1	1	0	1	1	1	1	0	0	0	0	0	1	1	1	1	0	0	0	nocov	0	1	0	0	0	1	1	1	1	0	0
O. sativa	IRIS_313-11738	XI-2	XI-2B	1	0	1	0	1	1	1	1	1	1	1	1	1	1	1	1	1	1	1	1	1	1	1	1	1	1	1	1	1	1	1	0	1	0	0	0	0	1	1	nocov	1	1	1	1	1	1
O. sativa	IRIS_313-11739	GJ-trp	GJ-trop1	0	0	0	1	0	nocov	0	0	0	1	0	0	1	0	0	0	0	0	0	0	0	0	0	0	0	1	nocov	1	0	nocov	0	0	0	nocov	0	1	0	1	0	0	0	0	1	0	1	0
O. sativa	IRIS_313-11740	XI-adm	XI-3B2	1	1	1	0	1	1	1	1	1	1	1	1	1	1	1	1	0	1	1	1	1	1	1	1	1	1	1	1	1	1	1	1	0	1	1	0	0	1	1	nocov	1	1	1	1	1	1
O. sativa	IRIS_313-11741	XI-2	XI-2B	1	1	1	0	1	1	1	1	1	1	1	1	1	1	1	1	1	1	1	1	1	1	1	1	1	0	1	1	1	1	0	0	1	1	nocov	0	nocov	1	0	nocov	1	1	1	1	1	1
O. sativa	IRIS_313-11742	cA(Aus)	cA2	1	1	1	0	1	1	1	1	1	0	1	nocov	1	1	1	1	1	0	0	1	1	0	0	0	0	0	nocov	1	1	0	1	0	0	1	0	0	nocov	1	0	0	1	1	0	1	0	0
O. sativa	IRIS_313-11743	cB(Bas)	cB	0	0	nocov	1	0	nocov	0	0	1	nocov	0	0	nocov	1	1	0	0	0	0	0	0	0	0	0	0	0	0	0	1	nocov	1	0	0	nocov	0	1	0	0	0	nocov	nocov	0	0	0	0	0
O. sativa	IRIS_313-11744	XI-adm	XI-3B2	1	1	1	0	1	1	1	1	1	1	1	1	1	1	1	1	0	1	1	1	1	1	0	1	1	1	1	1	1	1	0	0	1	1	1	0	1	0	1	1	1	nocov	1	0	1	1
O. sativa	IRIS_313-11745	XI-1A	XI-1A	1	1	1	0	1	1	1	1	1	1	1	1	1	1	1	1	1	1	1	1	1	1	1	1	1	1	1	1	1	1	1	0	0	1	1	0	0	1	1	nocov	1	1	1	1	1	1
O. sativa	IRIS_313-11746	XI-1A	XI-1A	1	1	1	0	1	1	1	1	1	1	1	1	1	1	1	1	0	1	1	1	1	1	1	1	1	1	1	1	1	1	1	1	1	1	1	0	0	1	1	1	1	1	1	1	0	1
O. sativa	IRIS_313-11747	XI-adm	XI-1	1	1	1	0	1	1	1	1	0	1	1	1	1	1	1	1	1	1	1	1	1	1	1	1	1	1	1	1	1	1	1	1	1	1	1	0	0	1	1	1	1	1	1	1	1	1
O. sativa	IRIS_313-11748	XI-adm	XI-3B2	1	1	1	0	1	1	1	1	1	1	1	1	1	1	1	1	0	1	1	1	1	1	1	1	1	1	1	1	1	1	0	1	0	1	1	0	1	0	1	1	1	nocov	1	0	1	1
O. sativa	IRIS_313-11750	XI-adm	XI-1	1	1	1	0	1	1	1	1	1	1	1	1	1	1	1	1	0	1	1	1	1	1	1	1	1	1	1	1	1	1	1	1	1	1	1	0	1	0	1	1	1	1	1	0	1	1
O. sativa	IRIS_313-11751	XI-adm	XI-1	1	1	1	0	1	1	1	1	1	1	1	1	1	1	1	1	1	1	1	1	0	1	1	1	1	1	1	1	1	1	1	1	1	1	1	0	0	1	1	nocov	1	1	1	1	1	1
O. sativa	IRIS_313-11752	XI-1A	XI-1A	1	1	1	0	1	1	1	1	1	1	1	1	1	1	1	1	1	1	1	1	1	1	1	1	1	1	1	1	1	1	1	1	1	1	1	0	0	1	1	1	1	1	1	1	0	1
O. sativa	IRIS_313-11753	XI-1A	XI-1A	1	1	1	0	1	1	1	1	1	1	1	1	1	1	1	1	1	1	1	1	1	1	1	1	1	1	1	1	1	1	1	1	1	1	1	0	0	1	1	1	1	1	1	1	0	1
O. sativa	IRIS_313-11754	admix	admix	0	0	1	1	1	1	0	0	1	1	0	1	1	1	0	0	0	1	0	0	0	1	0	0	1	1	1	1	1	1	0	1	0	0	0	0	0	1	0	nocov	0	0	1	0	0	1
O. sativa	IRIS_313-11755	GJ-trp	GJ-trop1	0	1	0	1	0	1	0	1	0	0	0	0	1	0	0	0	0	0	0	0	0	0	0	0	0	0	nocov	1	1	nocov	0	0	0	nocov	0	1	0	0	0	0	0	0	0	0	0	0
O. sativa	IRIS_313-11756	GJ-trp	GJ-trop1	0	0	0	1	0	nocov	0	0	0	1	0	0	1	0	1	0	0	0	0	0	0	0	0	0	0	0	0	1	1	nocov	0	0	0	nocov	0	1	0	1	0	0	0	0	0	0	0	0
O. sativa	IRIS_313-11757	XI-3	XI-3B1	1	1	1	0	1	1	1	1	1	1	1	1	1	1	1	1	1	1	1	1	1	1	1	1	1	1	1	1	1	1	1	0	0	1	1	0	1	1	1	1	1	0	1	1	1	1
O. sativa	IRIS_313-11758	XI-2	XI-2A	1	1	1	0	1	1	1	1	1	1	1	1	1	1	1	1	0	1	1	1	1	1	1	1	1	1	1	1	1	1	1	1	0	1	0	0	0	0	1	1	0	1	1	1	1	1
O. sativa	IRIS_313-11759	GJ-trp	GJ-trop1	0	1	0	1	0	nocov	0	0	0	1	0	0	1	0	0	0	0	0	0	0	1	0	0	0	0	1	0	1	1	nocov	0	0	0	nocov	0	1	0	0	0	0	1	0	0	0	0	0
O. sativa	IRIS_313-11760	XI-2	XI-2	1	0	0	0	1	1	1	1	1	1	1	1	1	1	1	1	1	1	1	1	1	1	1	1	1	1	1	1	1	1	1	1	1	nocov	0	0	0	1	1	1	1	1	1	1	1	1
O. sativa	IRIS_313-11761	XI-2	XI-2B	1	0	0	0	1	1	1	1	1	1	1	1	1	1	1	1	1	1	1	1	1	1	1	1	1	1	1	1	1	1	1	1	1	nocov	0	0	0	1	1	nocov	1	1	1	1	1	1
O. sativa	IRIS_313-11762	XI-2	XI-2A	1	0	1	0	1	1	1	1	1	1	1	1	1	1	1	1	1	1	1	1	1	1	1	1	1	1	1	1	1	1	1	1	1	1	1	0	0	1	1	1	1	1	1	1	1	1
O. sativa	IRIS_313-11763	XI-adm	XI-1	1	1	1	0	1	1	1	1	1	0	1	1	1	1	1	1	1	1	1	1	1	1	1	1	1	1	1	1	1	1	0	1	1	1	1	0	0	0	1	1	1	1	1	1	1	1
O. sativa	IRIS_313-11764	XI-3	XI-3	1	1	1	0	1	1	1	1	1	1	1	1	1	1	1	1	0	1	1	1	1	1	1	1	1	1	1	1	1	1	1	1	1	1	0	0	1	0	1	1	1	0	1	1	1	1
O. sativa	IRIS_313-11765	cB(Bas)	cB	1	0	1	1	0	nocov	0	1	0	1	0	1	1	1	1	0	0	0	0	0	0	0	0	0	0	1	0	1	1	0	0	0	0	nocov	0	0	0	0	1	nocov	1	0	0	0	0	0
O. sativa	IRIS_313-11766	admix	admix	1	1	1	0	1	nocov	1	1	1	1	0	nocov	1	0	1	1	1	0	1	1	1	1	0	1	1	1	1	1	1	nocov	1	0	0	nocov	0	0	1	1	1	nocov	nocov	0	1	0	1	0
O. sativa	IRIS_313-11767	admix	XI-adm	1	1	0	0	1	1	1	1	1	1	1	0	1	0	1	1	1	1	1	1	1	1	1	1	1	1	1	1	1	nocov	1	0	1	1	0	0	0	1	1	nocov	1	1	1	1	1	1
O. sativa	IRIS_313-11772	XI-2	XI-2B	1	0	1	0	1	1	1	1	1	1	1	1	1	1	1	1	1	1	1	1	1	1	1	1	1	1	1	1	1	1	1	1	0	nocov	0	0	0	1	1	nocov	1	1	1	1	1	1
O. sativa	IRIS_313-11773	XI-3	XI-3B1	1	1	1	0	1	1	1	1	1	1	1	1	1	1	1	1	0	1	1	1	1	1	1	1	1	1	1	1	1	1	1	1	0	nocov	1	0	1	0	1	1	1	1	1	1	1	1
O. sativa	IRIS_313-11779	XI-3	XI-3B1	1	1	1	0	1	1	1	1	1	1	1	1	1	1	1	1	0	1	1	1	1	1	1	1	1	1	1	1	1	1	0	1	0	1	1	0	1	0	1	1	1	1	1	1	0	1
O. sativa	IRIS_313-11780	XI-3	XI-3B1	1	0	1	0	1	1	1	1	1	1	1	1	1	1	1	1	0	1	1	1	1	1	1	1	1	1	nocov	1	1	1	1	1	1	nocov	1	0	1	1	1	1	1	1	1	1	1	1
O. sativa	IRIS_313-11782	XI-2	XI-2	1	0	0	0	1	nocov	1	1	1	1	1	1	1	1	1	1	1	1	1	1	1	1	0	1	1	1	1	1	1	1	1	1	1	nocov	1	0	nocov	1	1	0	1	1	1	1	1	1
O. sativa	IRIS_313-11783	XI-adm	XI-2A	1	1	1	0	1	1	1	1	1	1	1	1	1	1	1	1	0	1	1	1	1	1	1	1	1	1	1	1	1	1	1	1	0	nocov	0	0	0	0	1	1	1	nocov	1	1	1	1
O. sativa	IRIS_313-11784	XI-1B	XI-1B	0	1	1	0	1	nocov	1	1	0	1	1	1	1	1	1	1	0	1	1	1	1	1	1	1	1	1	nocov	1	1	nocov	1	1	1	1	0	0	1	1	1	1	1	1	1	1	0	1
O. sativa	IRIS_313-11785	XI-3	XI-3B1	1	nocov	1	0	1	1	1	1	1	1	1	1	1	1	1	1	0	1	1	1	1	1	1	1	1	1	1	1	1	1	1	1	1	nocov	1	0	1	1	1	1	1	1	1	1	1	1
O. sativa	IRIS_313-11786	XI-3	XI-3B1	1	1	1	0	1	1	1	1	1	1	1	1	1	1	1	1	0	1	1	1	1	1	1	1	1	1	1	1	1	1	1	1	1	1	1	0	1	1	1	nocov	1	1	1	1	1	1
O. sativa	IRIS_313-11787	XI-2	XI-2A	1	1	1	0	1	1	1	1	1	1	1	1	1	1	1	1	1	1	1	1	1	1	1	1	1	1	1	1	1	1	1	0	0	1	1	0	1	0	1	0	1	1	1	1	1	1
O. sativa	IRIS_313-11788	GJ-adm	GJ-temp	0	0	0	1	0	nocov	0	0	0	0	0	0	nocov	0	0	1	0	0	nocov	0	0	0	0	0	0	0	0	nocov	0	nocov	0	0	0	nocov	0	1	0	0	0	0	0	0	0	0	0	0
O. sativa	IRIS_313-11789	XI-2	XI-2B	1	0	1	0	1	1	1	1	1	1	1	1	1	1	1	1	1	1	1	1	1	1	0	1	1	1	1	1	1	1	1	1	1	1	0	0	0	1	1	nocov	1	1	1	1	1	1
O. sativa	IRIS_313-11790	GJ-trp	GJ-trop2	0	0	1	1	0	1	0	0	0	0	0	0	nocov	1	0	0	0	0	nocov	0	0	0	0	0	0	0	1	1	0	nocov	0	0	0	nocov	0	1	0	0	1	1	0	0	0	0	0	0
O. sativa	IRIS_313-11791	XI-2	XI-2B	1	1	1	0	1	1	1	1	1	1	1	1	1	1	1	1	1	1	1	1	1	1	1	1	1	1	1	1	1	1	1	1	0	1	0	0	nocov	1	1	0	1	1	1	0	1	1
O. sativa	IRIS_313-11792	GJ-trp	GJ-trop1	0	0	0	1	0	1	0	0	0	0	nocov	0	1	0	0	0	0	0	nocov	0	0	0	0	0	0	0	nocov	1	0	nocov	0	0	0	nocov	0	1	0	0	0	nocov	0	0	1	0	0	0
O. sativa	IRIS_313-11793	XI-2	XI-2B	1	0	1	0	1	1	1	1	1	1	1	1	1	1	1	1	1	1	1	1	1	1	1	1	1	1	1	1	1	1	1	1	1	1	0	0	0	1	1	nocov	nocov	1	1	1	1	1
O. sativa	IRIS_313-11794	XI-2	XI-2B	1	0	1	0	1	1	1	1	1	1	1	1	1	1	1	1	1	1	1	1	1	1	1	1	1	1	1	1	1	1	1	1	1	1	0	0	nocov	1	1	0	1	1	1	1	1	1
O. sativa	IRIS_313-11795	XI-1A	XI-1A	1	1	1	0	1	1	1	1	1	1	1	1	1	1	1	1	1	1	1	1	1	1	1	1	1	1	1	1	1	1	0	1	1	1	1	0	0	1	1	1	1	1	1	1	1	1
O. sativa	IRIS_313-11796	XI-1A	XI-1A	1	1	1	0	1	nocov	1	1	0	1	1	1	1	1	1	1	1	1	1	1	1	1	0	1	1	1	1	1	1	1	1	1	1	1	1	0	0	1	1	1	1	1	1	1	0	1
O. sativa	IRIS_313-11797	XI-1A	XI-1A	1	1	1	0	1	1	1	0	0	1	1	1	1	1	1	1	1	1	1	1	0	1	1	1	1	1	1	nocov	1	1	1	1	0	1	1	0	0	1	1	0	1	1	1	1	1	1
O. sativa	IRIS_313-11798	XI-1B	XI-1B	1	1	1	0	1	1	1	1	1	0	1	1	1	1	1	1	0	1	1	1	1	1	1	1	1	1	1	1	1	1	1	1	1	1	1	0	1	0	1	1	1	1	1	1	1	1
O. sativa	IRIS_313-11799	XI-1A	XI-1A	1	1	1	0	1	1	1	1	0	1	1	1	1	1	1	1	1	1	1	1	1	1	1	1	1	1	1	1	1	1	1	1	1	1	1	0	0	1	1	0	1	1	1	1	1	1
O. sativa	IRIS_313-11800	GJ-tmp	GJ-temp	0	0	0	1	0	nocov	0	0	0	0	0	0	1	0	0	0	0	0	nocov	0	0	0	0	0	0	0	nocov	nocov	0	nocov	0	0	0	nocov	0	1	0	0	1	0	0	0	0	0	0	0
O. sativa	IRIS_313-11801	XI-adm	XI-1	1	1	1	0	1	1	1	1	1	1	1	1	1	1	1	1	1	1	1	1	1	1	1	1	1	1	1	1	1	1	1	1	1	1	1	0	1	0	0	1	1	1	1	1	1	1
O. sativa	IRIS_313-11802	XI-1A	XI-1A	1	1	1	0	1	1	1	1	1	1	1	1	1	1	1	1	1	1	1	1	1	1	1	1	1	1	1	1	1	1	0	0	0	1	1	0	0	1	1	1	1	1	0	1	1	1
O. sativa	IRIS_313-11803	GJ-tmp	GJ-temp	0	nocov	0	1	0	nocov	nocov	0	0	0	0	nocov	1	0	0	0	0	0	nocov	0	0	0	0	0	0	0	0	nocov	0	nocov	0	0	0	nocov	0	1	0	0	0	nocov	nocov	0	0	0	0	0
O. sativa	IRIS_313-11804	XI-1A	XI-1A	1	1	1	0	1	1	1	1	1	1	1	1	1	1	1	1	1	1	1	1	1	1	1	1	1	1	1	1	1	1	1	1	1	1	1	0	nocov	0	1	1	1	1	1	1	0	1
O. sativa	IRIS_313-11805	XI-1A	XI-1A	1	1	1	0	1	1	1	1	1	1	1	1	1	1	1	1	1	1	1	1	1	1	1	1	1	1	1	1	1	1	1	0	0	1	1	0	0	1	1	1	1	1	1	1	1	1
O. sativa	IRIS_313-11806	XI-1A	XI-1A	1	1	1	0	1	nocov	1	1	1	1	1	1	1	1	1	1	1	1	1	1	1	1	1	1	1	1	1	1	1	1	0	1	1	1	1	0	0	1	1	1	1	1	1	1	0	1
O. sativa	IRIS_313-11807	XI-adm	XI-1B	1	0	0	0	1	nocov	1	1	1	0	0	1	1	0	1	1	0	1	1	1	1	1	1	1	1	1	1	1	1	1	1	1	1	1	1	0	0	0	1	1	1	1	1	1	1	1
O. sativa	IRIS_313-11808	XI-adm	XI-1	1	0	0	0	0	nocov	0	1	1	0	0	1	1	0	1	1	0	1	1	1	1	1	1	1	1	1	1	1	1	1	1	0	1	1	1	0	1	0	1	1	1	1	1	1	1	1
O. sativa	IRIS_313-11809	cA(Aus)	cA1	1	1	1	0	1	1	1	1	1	0	0	1	1	1	1	1	1	0	1	1	1	1	0	1	0	0	nocov	1	1	0	0	0	0	1	nocov	0	0	0	1	nocov	1	1	1	1	0	0
O. sativa	IRIS_313-11810	XI-3	XI-3B1	1	1	1	0	1	1	1	1	1	1	1	1	1	1	1	1	0	1	1	1	1	1	1	1	1	1	1	1	1	1	1	1	1	1	1	0	1	0	1	1	1	1	1	1	1	1
O. sativa	IRIS_313-11811	XI-2	XI-2	1	0	0	0	1	1	1	1	1	1	1	1	1	1	1	1	1	1	1	1	1	1	1	1	1	1	1	1	1	1	1	1	1	1	1	0	0	1	1	nocov	1	1	1	1	1	1
O. sativa	IRIS_313-11812	XI-3	XI-3B1	1	1	1	0	1	1	1	1	1	1	1	1	1	1	1	1	0	1	1	1	1	1	1	1	1	1	1	1	1	1	1	0	1	nocov	1	0	1	0	1	1	1	1	1	1	1	1
O. sativa	IRIS_313-11813	XI-3	XI-3B1	1	1	1	0	1	1	1	1	1	1	1	1	1	1	1	1	0	1	1	1	1	1	1	1	1	1	1	1	1	1	1	1	1	1	1	0	1	0	1	nocov	1	1	1	1	1	1
O. sativa	IRIS_313-11814	XI-3	XI-3B1	1	1	1	0	1	1	1	1	1	1	1	1	1	1	1	1	0	1	1	1	1	1	1	1	1	1	1	1	1	1	1	1	0	1	1	0	1	0	1	1	1	1	1	1	1	1
O. sativa	IRIS_313-11815	XI-3	XI-3B1	1	1	1	0	1	1	1	1	1	1	1	1	1	1	1	1	0	1	1	1	1	1	1	1	1	1	1	1	1	1	1	nocov	1	1	1	0	1	0	1	1	1	1	1	1	1	1
O. sativa	IRIS_313-11816	XI-adm	XI-adm	1	1	1	0	1	1	1	1	1	1	1	1	1	1	1	1	0	1	1	1	1	1	1	1	1	1	nocov	1	1	1	0	1	1	0	1	0	0	1	1	nocov	1	1	1	1	0	1
O. sativa	IRIS_313-11817	XI-adm	XI-3B	1	1	1	0	1	1	1	1	1	1	1	1	1	1	1	1	0	1	1	1	1	1	1	1	1	1	1	1	1	1	1	1	1	1	1	0	1	1	1	1	1	1	1	1	1	1
O. sativa	IRIS_313-11818	XI-adm	XI-adm	1	1	1	0	1	1	1	1	1	1	1	1	1	1	1	1	0	1	1	0	1	1	1	1	1	1	nocov	1	1	1	0	1	1	1	nocov	0	0	1	1	nocov	1	1	0	1	1	1
O. sativa	IRIS_313-11819	XI-3	XI-3B1	1	1	1	0	1	1	1	1	1	1	1	1	1	1	1	1	0	1	1	1	1	1	1	1	1	1	1	1	1	1	1	0	0	1	1	0	1	1	1	nocov	1	1	1	1	1	1
O. sativa	IRIS_313-11820	XI-3	XI-3B1	1	0	1	0	1	1	1	1	1	1	1	1	1	1	1	1	0	1	1	1	1	1	1	1	1	1	1	1	1	1	1	1	1	nocov	1	0	1	1	1	1	1	1	1	1	1	1
O. sativa	IRIS_313-11821	XI-2	XI-2B	1	1	1	0	1	1	1	1	1	1	1	1	1	1	1	1	1	1	1	1	1	1	1	1	1	1	1	1	1	1	1	1	1	1	0	0	0	1	1	1	1	nocov	1	1	0	1
O. sativa	IRIS_313-11822	XI-2	XI-2B	1	0	1	0	1	1	1	1	1	1	1	1	1	1	1	1	1	1	1	1	1	1	1	1	1	1	1	1	1	1	1	0	1	1	0	0	0	1	1	nocov	1	1	1	1	1	1
O. sativa	IRIS_313-11823	XI-2	XI-2	1	1	1	0	1	1	1	1	1	1	1	1	1	1	1	1	1	0	1	1	1	1	1	1	1	1	1	1	1	1	1	1	1	1	1	0	0	1	1	nocov	1	1	1	1	1	1
O. sativa	IRIS_313-11824	XI-2	XI-2B	1	0	1	0	1	1	1	1	1	1	1	1	1	1	1	1	1	1	1	1	1	1	1	1	1	1	1	1	1	1	1	0	1	1	0	0	0	1	1	nocov	1	1	1	1	1	1
O. sativa	IRIS_313-11825	cB(Bas)	cB	1	1	1	1	0	nocov	1	0	0	0	0	0	nocov	1	1	0	0	0	nocov	0	0	0	0	0	0	0	nocov	1	1	0	0	0	0	nocov	0	1	0	0	0	0	nocov	0	0	0	0	0
O. sativa	IRIS_313-11826	cB(Bas)	cB	1	1	0	1	0	nocov	nocov	0	0	0	0	0	1	1	1	0	0	0	nocov	0	0	0	nocov	0	0	1	nocov	1	0	0	0	0	0	nocov	0	0	0	0	0	0	1	0	0	0	0	0
O. sativa	IRIS_313-11827	XI-2	XI-2B	1	1	1	0	1	1	1	1	1	1	1	1	1	1	1	1	1	0	1	1	1	1	1	1	1	1	1	1	1	1	1	0	1	1	1	0	0	1	1	nocov	1	1	0	1	1	1
O. sativa	IRIS_313-11828	XI-2	XI-2B	1	0	1	0	1	1	1	1	1	1	1	1	1	1	1	1	1	1	1	1	1	1	1	1	1	1	1	1	1	1	1	0	1	1	1	0	0	1	1	1	1	1	1	1	1	1
O. sativa	IRIS_313-11829	GJ-tmp	GJ-temp	0	0	0	1	0	nocov	1	0	0	0	0	0	1	0	0	0	0	0	nocov	0	0	0	0	0	0	0	nocov	0	0	nocov	0	0	0	nocov	0	1	0	0	0	0	0	0	0	0	0	0
O. sativa	IRIS_313-11830	XI-3	XI-3A	1	nocov	1	0	1	1	1	1	1	1	1	1	1	1	1	1	0	1	1	1	1	1	1	1	1	1	1	1	1	1	1	1	1	1	1	0	1	0	1	nocov	1	1	1	1	1	1
O. sativa	IRIS_313-11831	GJ-sbtrp	GJ-subtrp	0	1	0	1	0	nocov	0	0	0	0	0	0	1	0	0	0	0	0	nocov	0	0	0	0	0	0	0	nocov	1	0	nocov	0	0	0	nocov	0	1	0	0	1	nocov	0	0	0	0	0	0
O. sativa	IRIS_313-11832	GJ-sbtrp	GJ-subtrp	0	0	1	1	0	nocov	0	0	0	0	0	0	1	0	0	0	0	0	nocov	1	0	0	nocov	0	0	0	nocov	1	0	nocov	0	0	0	nocov	0	1	0	0	0	0	0	0	0	0	0	0
O. sativa	IRIS_313-11833	XI-3	XI-3A	1	1	1	0	1	nocov	1	1	1	1	1	1	1	1	1	1	0	1	1	1	1	1	1	1	1	1	1	1	1	1	1	1	0	1	0	0	1	1	1	1	1	nocov	1	1	1	1
O. sativa	IRIS_313-11834	GJ-sbtrp	GJ-subtrp	0	0	1	1	0	nocov	0	0	0	0	0	0	1	0	0	0	0	0	nocov	0	0	0	0	0	0	0	nocov	1	0	nocov	0	0	0	nocov	0	1	0	0	0	0	nocov	0	0	0	0	0
O. sativa	IRIS_313-11835	XI-adm	XI-3B1	1	1	1	0	1	1	1	1	1	1	1	1	1	1	1	1	1	1	1	1	1	1	1	1	1	1	1	1	1	1	1	1	1	1	0	0	1	1	1	1	1	1	1	1	1	1
O. sativa	IRIS_313-11836	XI-3	XI-3B1	1	1	1	0	1	1	1	1	1	1	1	1	1	1	1	1	0	1	1	1	1	1	1	1	1	1	1	1	1	1	1	nocov	1	1	nocov	0	1	0	1	1	1	1	1	1	1	1
O. sativa	IRIS_313-11837	XI-3	XI-3B1	1	0	1	0	1	1	1	1	1	1	1	1	1	1	1	1	0	1	1	1	1	1	1	1	1	1	1	1	1	1	1	1	1	nocov	1	0	1	1	1	1	1	1	1	1	1	1
O. sativa	IRIS_313-11838	XI-3	XI-3B1	1	1	1	0	1	1	1	1	1	1	1	1	1	1	1	1	0	1	1	1	1	1	1	1	1	1	1	1	1	1	1	1	0	1	1	0	1	0	1	1	1	1	1	1	1	1
O. sativa	IRIS_313-11839	XI-3	XI-3B1	1	1	1	0	1	1	1	1	1	1	1	1	1	1	1	1	0	1	1	1	1	1	1	1	1	1	1	1	1	1	1	nocov	1	nocov	nocov	0	1	0	1	1	1	1	1	1	1	1
O. sativa	IRIS_313-11840	XI-3	XI-3A	1	0	1	0	1	1	0	1	1	1	1	1	1	1	1	1	0	1	1	1	1	1	1	1	1	1	1	1	1	1	1	0	1	1	0	0	1	0	1	1	1	0	1	1	1	1
O. sativa	IRIS_313-11841	XI-3	XI-3B1	1	1	1	0	1	1	1	1	1	1	1	1	1	1	1	1	0	1	1	1	1	1	1	1	1	1	1	1	1	1	1	1	1	nocov	1	0	1	1	1	1	1	1	1	1	1	1
O. sativa	IRIS_313-11842	XI-3	XI-3A	1	1	1	0	1	1	1	1	1	1	1	1	1	1	1	1	0	1	1	1	1	1	1	1	1	1	1	1	1	1	1	1	1	nocov	nocov	0	1	0	1	1	1	0	1	1	1	1
O. sativa	IRIS_313-11843	XI-3	XI-3B1	1	1	1	0	1	1	1	1	1	1	1	1	1	1	1	1	0	1	1	1	1	1	1	1	1	1	1	1	1	1	1	0	1	1	nocov	0	1	0	1	nocov	1	nocov	0	1	1	1
O. sativa	IRIS_313-11844	XI-3	XI-3B1	1	1	1	0	1	1	1	1	1	1	1	1	1	1	1	1	0	1	1	1	1	1	1	1	1	1	1	1	1	1	1	1	0	1	1	0	1	0	1	nocov	1	1	1	1	1	1
O. sativa	IRIS_313-11845	GJ-sbtrp	GJ-subtrp	1	1	0	1	0	nocov	0	nocov	0	0	0	0	1	nocov	0	0	nocov	0	nocov	0	0	0	nocov	0	0	0	nocov	1	0	nocov	0	0	0	nocov	0	1	0	0	1	0	0	nocov	0	nocov	0	1
O. sativa	IRIS_313-11846	GJ-sbtrp	GJ-subtrp	0	1	0	1	0	nocov	0	0	0	0	0	0	1	0	0	0	0	0	nocov	0	0	0	0	0	0	0	nocov	1	0	nocov	0	0	0	nocov	0	1	0	0	0	nocov	0	0	0	0	0	0
O. sativa	IRIS_313-11848	XI-3	XI-3	1	1	1	0	1	1	1	1	1	1	1	1	1	1	1	1	0	1	1	1	1	1	1	1	1	1	1	1	1	1	1	1	0	1	0	0	1	0	1	1	1	1	1	1	1	1
O. sativa	IRIS_313-11849	XI-3	XI-3	1	1	1	0	1	1	1	1	1	1	1	1	1	1	1	1	0	1	1	1	1	1	1	1	1	1	1	1	1	1	1	0	1	1	1	0	1	1	1	nocov	1	1	1	1	1	1
O. sativa	IRIS_313-11850	XI-3	XI-3A	1	1	1	0	1	1	1	1	1	1	1	1	1	1	1	1	0	1	1	1	1	1	1	1	1	1	1	1	1	1	1	1	1	1	0	0	1	0	1	1	1	0	1	1	1	1
O. sativa	IRIS_313-11851	GJ-trp	GJ-trop1	0	0	0	1	0	nocov	0	0	0	0	0	0	1	0	0	0	0	0	nocov	0	0	0	0	0	0	1	nocov	nocov	0	nocov	0	0	0	nocov	0	1	0	0	0	0	0	0	0	0	0	0
O. sativa	IRIS_313-11852	XI-1A	XI-1A	1	0	1	0	1	1	1	1	1	1	1	1	1	1	1	1	0	1	1	1	1	1	1	1	1	1	1	1	1	1	1	1	1	1	0	0	nocov	0	1	nocov	1	1	1	1	0	1
O. sativa	IRIS_313-11853	XI-1A	XI-1A	1	1	1	0	1	1	1	1	1	1	1	1	1	1	1	1	1	1	1	1	1	1	1	1	1	1	1	1	1	1	0	1	1	1	1	0	0	1	1	0	1	1	1	1	1	1
O. sativa	IRIS_313-11854	XI-1A	XI-1A	1	1	1	0	1	1	1	1	1	1	1	1	1	1	1	1	1	1	1	1	1	1	1	1	1	1	1	1	1	1	1	1	1	1	1	0	0	1	1	nocov	1	1	1	1	1	1
O. sativa	IRIS_313-11855	XI-1A	XI-1A	1	0	1	0	1	1	1	1	1	1	1	1	1	1	1	1	1	1	1	1	1	1	1	1	1	1	1	1	1	1	0	1	1	1	0	0	0	0	1	1	1	nocov	1	1	1	1
O. sativa	IRIS_313-11856	XI-1A	XI-1A	1	1	1	0	1	1	1	1	1	1	1	1	1	1	1	1	1	1	1	1	1	1	1	1	1	1	nocov	1	1	1	1	1	1	1	1	0	0	1	1	1	1	1	1	1	1	1
O. sativa	IRIS_313-11857	XI-1A	XI-1A	1	1	1	0	1	1	1	1	1	1	1	1	1	1	1	1	1	1	1	1	1	1	0	1	1	1	1	1	1	1	0	1	1	1	1	0	0	1	1	1	1	1	1	1	1	1
O. sativa	IRIS_313-11858	XI-1A	XI-1A	1	1	1	0	1	1	1	1	1	1	1	1	1	1	1	1	1	1	1	1	1	1	1	1	1	1	1	1	1	1	1	1	1	1	1	0	0	1	1	1	1	nocov	1	1	1	1
O. sativa	IRIS_313-11859	XI-1A	XI-1A	1	1	1	0	1	1	1	1	1	1	1	1	1	1	1	1	1	1	1	1	1	1	1	1	1	1	1	1	0	1	1	1	1	1	1	0	0	1	1	1	1	1	1	1	1	1
O. sativa	IRIS_313-11860	XI-1A	XI-1A	1	1	1	0	1	1	1	1	1	1	1	1	1	1	1	1	1	1	1	1	1	1	1	1	1	1	1	1	1	1	1	0	1	1	1	0	0	1	1	1	1	1	1	1	1	1
O. sativa	IRIS_313-11861	XI-1A	XI-1A	1	1	1	0	1	1	1	1	1	1	1	1	1	1	1	1	1	1	1	1	1	1	1	1	1	1	1	1	1	1	1	1	1	1	1	0	0	1	1	1	1	1	1	1	1	1
O. sativa	IRIS_313-11862	XI-1A	XI-1A	1	1	1	0	1	1	1	1	1	1	1	1	1	1	1	1	1	1	1	1	1	1	1	1	1	1	1	1	1	1	1	1	1	1	nocov	0	0	1	1	1	1	1	0	1	1	1
O. sativa	IRIS_313-11863	XI-1A	XI-1A	1	1	1	0	1	nocov	1	1	1	1	1	1	1	1	1	1	1	1	1	1	1	1	1	1	1	1	1	1	1	1	1	0	1	1	0	0	0	1	1	1	0	1	1	1	0	1
O. sativa	IRIS_313-11865	XI-1A	XI-1A	1	1	1	0	1	1	1	1	1	0	1	1	1	1	1	1	1	1	1	1	1	1	1	1	1	1	1	1	1	1	1	1	1	1	1	0	0	0	1	1	1	1	1	1	1	1
O. sativa	IRIS_313-11866	XI-1A	XI-1A	1	1	1	0	1	1	1	1	1	1	1	1	1	1	1	1	1	1	1	1	1	1	1	1	1	1	1	1	1	1	0	1	1	1	1	0	0	1	1	1	1	1	1	1	1	1
O. sativa	IRIS_313-11867	XI-1A	XI-1A	1	0	1	0	1	nocov	1	1	1	1	1	1	1	1	1	1	1	1	1	1	1	1	1	1	1	1	1	1	1	1	1	1	1	1	0	0	0	0	1	1	1	1	1	1	1	1
O. sativa	IRIS_313-11868	XI-1A	XI-1A	1	1	1	0	1	nocov	1	1	1	1	1	1	1	1	1	1	1	1	1	1	1	1	1	1	1	1	1	1	1	1	1	0	1	1	nocov	0	0	0	1	1	1	1	1	1	1	1
O. sativa	IRIS_313-11869	XI-1A	XI-1A	1	1	1	0	1	1	1	1	1	1	1	1	1	1	1	1	1	1	1	1	1	1	1	1	1	1	1	1	1	1	0	1	1	1	1	0	0	1	1	nocov	1	1	1	1	0	1
O. sativa	IRIS_313-11870	XI-1A	XI-1A	1	0	1	0	1	1	1	1	0	1	1	1	1	1	1	1	1	1	1	1	1	1	1	1	1	1	1	1	1	1	1	0	1	1	1	0	0	1	1	1	1	1	1	1	1	1
O. sativa	IRIS_313-11871	XI-1A	XI-1A	1	1	1	0	1	nocov	1	1	1	1	1	1	1	1	1	1	1	1	1	1	1	1	0	1	1	1	1	1	1	1	1	1	1	1	0	0	0	1	1	1	1	nocov	1	1	1	1
O. sativa	IRIS_313-11872	XI-1A	XI-1A	1	1	1	0	1	nocov	1	1	1	1	1	1	1	1	1	1	1	0	1	1	1	1	0	1	1	1	nocov	1	1	1	1	0	1	nocov	nocov	0	0	1	1	1	1	nocov	1	1	0	1
O. sativa	IRIS_313-11875	GJ-tmp	GJ-temp	0	0	0	1	0	nocov	0	0	0	0	0	0	1	0	0	0	0	0	nocov	0	0	0	0	0	0	0	nocov	0	0	nocov	0	0	0	nocov	0	1	0	0	0	0	0	0	0	nocov	0	0
O. sativa	IRIS_313-11876	XI-1A	XI-adm	1	0	1	0	1	nocov	0	0	1	1	1	1	1	1	1	1	1	1	1	1	0	1	0	1	1	1	1	nocov	1	0	1	0	1	1	0	0	0	0	0	1	1	nocov	0	1	1	1
O. sativa	IRIS_313-11877	XI-1A	XI-1A	1	1	1	0	1	1	1	1	0	1	1	1	1	1	1	1	1	1	1	1	1	1	1	1	1	1	1	1	1	1	1	0	0	1	1	0	0	1	1	nocov	1	1	1	1	1	1
O. sativa	IRIS_313-11878	XI-1A	XI-1A	1	1	1	0	1	1	1	1	1	1	1	1	1	1	1	1	1	1	1	1	1	1	1	1	1	1	1	1	1	1	1	0	1	1	1	0	0	0	1	nocov	1	1	0	1	0	1
O. sativa	IRIS_313-11881	XI-1A	XI-1A	1	1	1	0	1	1	1	1	0	1	1	1	1	1	1	1	1	1	1	1	1	1	1	1	1	1	1	1	1	1	0	0	0	1	1	0	nocov	1	1	nocov	1	1	1	1	1	1
O. sativa	IRIS_313-11882	XI-1A	XI-1A	1	1	1	0	1	1	1	1	1	1	1	1	1	1	1	1	1	1	1	1	1	1	1	1	1	1	1	1	1	1	1	0	1	1	1	0	0	1	1	nocov	1	1	1	1	1	1
O. sativa	IRIS_313-11884	XI-1A	XI-1A	1	1	1	0	1	1	1	1	0	1	1	1	1	1	1	1	1	1	1	1	1	1	1	1	1	1	1	1	1	1	1	0	0	1	1	0	0	1	1	nocov	1	1	1	1	1	1
O. sativa	IRIS_313-11885	XI-1A	XI-1A	1	1	1	0	1	1	1	1	0	1	1	1	1	1	1	1	1	1	1	1	1	1	1	1	1	1	1	1	1	1	1	1	0	1	1	0	0	1	1	nocov	1	1	1	1	1	1
O. sativa	IRIS_313-11886	XI-1B	XI-1B1	1	1	1	0	1	1	1	1	1	0	1	1	1	1	1	1	0	1	1	1	1	1	1	1	1	1	1	1	1	1	1	1	1	1	1	0	1	1	1	1	1	1	1	1	1	1
O. sativa	IRIS_313-11887	XI-1B	XI-1B1	1	1	1	0	1	1	1	1	1	1	0	1	1	1	1	1	0	1	1	1	1	1	1	1	1	1	1	1	1	1	1	1	1	1	1	0	1	0	1	nocov	1	1	1	1	1	1
O. sativa	IRIS_313-11888	cA(Aus)	cA1	1	1	1	0	1	1	1	1	1	0	1	1	1	0	1	1	1	0	1	1	1	0	0	1	0	0	nocov	1	1	0	0	0	0	nocov	0	0	nocov	0	1	nocov	0	1	0	1	0	0
O. sativa	IRIS_313-11889	XI-adm	XI-adm	1	1	1	0	1	1	1	1	1	nocov	1	1	1	1	1	1	1	1	1	1	1	0	1	0	0	1	1	1	1	1	1	0	1	1	1	0	0	0	1	nocov	1	0	1	1	1	1
O. sativa	IRIS_313-11890	GJ-tmp	GJ-temp	0	0	0	1	0	1	nocov	0	0	0	0	0	1	0	0	0	0	0	nocov	0	0	0	0	0	0	0	nocov	0	0	nocov	0	0	0	nocov	0	0	0	0	0	nocov	0	0	1	0	0	0
O. sativa	IRIS_313-11892	GJ-sbtrp	GJ-subtrp	0	0	0	1	0	nocov	0	0	0	0	0	0	1	0	0	0	0	0	0	0	0	0	0	0	0	0	nocov	1	0	nocov	0	0	0	nocov	0	1	0	0	1	0	0	0	0	0	0	0
O. sativa	IRIS_313-11893	XI-adm	XI-3B	1	1	1	0	1	1	1	1	1	1	1	1	1	1	1	1	0	0	1	1	1	1	1	1	1	1	1	1	1	1	0	1	1	1	nocov	0	1	0	1	1	1	0	1	1	1	1
O. sativa	IRIS_313-11894	XI-adm	XI-3B2	1	1	1	0	1	1	1	1	1	1	1	1	1	1	1	1	1	1	1	1	1	1	0	1	1	1	1	1	1	1	1	0	0	1	1	0	1	1	1	1	0	0	1	1	1	1
O. sativa	IRIS_313-11895	XI-3	XI-3B1	1	1	1	0	1	1	1	1	1	1	1	1	1	1	1	1	0	1	1	1	1	1	1	1	1	1	1	1	1	1	1	0	1	1	1	0	1	0	1	nocov	1	nocov	0	1	0	1
O. sativa	IRIS_313-11896	XI-3	XI-3B1	1	1	1	0	1	1	1	1	1	1	1	1	1	1	1	1	0	1	1	1	1	1	1	1	1	1	1	1	1	1	1	0	1	1	nocov	0	1	0	1	nocov	1	nocov	0	1	1	1
O. sativa	IRIS_313-11897	GJ-sbtrp	GJ-subtrp	0	1	1	1	0	nocov	0	0	0	0	0	0	1	0	0	0	0	0	nocov	0	0	0	0	0	0	0	nocov	1	0	nocov	0	0	0	nocov	0	1	0	0	1	nocov	0	nocov	0	0	0	0
O. sativa	IRIS_313-11898	XI-3	XI-3B1	1	1	1	0	1	1	1	1	1	1	1	1	1	1	1	1	1	1	1	1	1	1	1	1	1	1	1	1	1	1	0	1	1	1	1	0	0	0	1	1	1	0	1	1	1	1
O. sativa	IRIS_313-11899	XI-adm	XI-3B	1	1	1	0	1	1	1	1	1	1	1	1	1	1	1	1	1	1	1	1	1	1	1	1	1	1	1	1	1	1	0	1	1	1	1	0	1	1	1	0	1	nocov	1	1	1	1
O. sativa	IRIS_313-11900	GJ-sbtrp	GJ-subtrp	0	1	0	1	0	nocov	0	0	0	0	0	0	1	0	0	0	0	0	nocov	0	0	0	0	0	0	0	nocov	1	0	nocov	0	0	0	nocov	0	1	0	0	1	0	0	0	0	0	0	0
O. sativa	IRIS_313-11901	XI-3	XI-3A	1	1	1	0	1	nocov	1	1	1	1	1	1	1	1	1	1	0	1	1	1	1	1	1	1	1	1	nocov	1	1	1	1	1	1	1	0	0	1	1	1	1	1	nocov	1	1	1	1
O. sativa	IRIS_313-11902	XI-3	XI-3A	1	1	1	0	1	1	1	1	1	1	1	1	1	1	1	1	0	1	1	1	1	1	1	1	1	1	1	1	1	1	1	1	1	1	0	0	1	0	1	nocov	1	0	1	1	1	1
O. sativa	IRIS_313-11903	GJ-trp	GJ-trop1	nocov	0	0	1	0	1	0	0	0	1	0	0	1	0	0	0	0	0	nocov	0	0	0	0	0	0	1	nocov	1	0	nocov	0	0	0	nocov	0	1	0	0	0	0	1	0	1	0	0	0
O. sativa	IRIS_313-11904	XI-3	XI-3A	1	1	1	0	1	nocov	1	1	1	1	1	1	1	1	1	1	0	1	1	1	1	1	1	1	1	1	1	1	1	1	1	0	1	1	1	0	1	0	1	nocov	1	nocov	1	1	1	1
O. sativa	IRIS_313-11905	XI-3	XI-3A	1	1	1	0	1	1	1	1	1	1	1	1	1	1	1	1	0	1	1	1	1	1	1	1	1	1	1	1	1	1	1	1	1	1	1	0	1	0	1	nocov	1	1	1	1	1	1
O. sativa	IRIS_313-11906	GJ-trp	GJ-trop1	0	0	1	1	0	nocov	0	0	1	1	0	0	1	0	0	0	0	0	0	0	0	0	0	0	0	1	nocov	1	0	nocov	0	0	0	nocov	0	1	0	1	0	0	0	0	1	0	0	0
O. sativa	IRIS_313-11907	GJ-trp	GJ-trop1	0	nocov	0	1	0	nocov	0	0	0	1	0	0	1	0	0	0	0	0	nocov	0	0	0	0	0	0	1	nocov	nocov	0	nocov	0	0	0	nocov	0	1	0	1	0	nocov	nocov	0	0	0	0	0
O. sativa	IRIS_313-11908	GJ-tmp	GJ-temp	0	0	0	1	0	nocov	0	0	0	0	0	0	nocov	0	0	0	0	0	nocov	0	0	0	0	0	0	0	nocov	nocov	0	nocov	0	0	0	0	0	1	0	0	1	nocov	0	0	0	0	0	0
O. sativa	IRIS_313-11909	XI-1A	XI-1A	1	1	1	0	1	1	1	1	1	1	1	1	1	1	1	1	1	1	1	1	1	1	1	1	1	1	1	1	1	1	1	1	1	1	0	0	0	0	1	1	1	nocov	1	1	1	1
O. sativa	IRIS_313-11910	XI-adm	XI-3B2	1	1	1	0	1	1	1	1	1	1	1	1	1	1	1	1	1	1	1	1	1	1	1	1	1	1	1	1	1	nocov	1	1	1	1	1	0	1	0	1	nocov	1	nocov	0	0	1	1
O. sativa	IRIS_313-11911	XI-1A	XI-1A	1	1	1	0	1	1	1	1	0	1	1	1	1	1	1	1	1	1	1	1	1	1	0	1	1	1	1	1	1	1	0	0	1	1	1	0	0	1	1	nocov	1	1	1	1	1	1
O. sativa	IRIS_313-11912	XI-3	XI-3A	1	1	1	0	1	1	1	1	1	1	1	1	1	1	1	1	0	1	1	1	1	1	1	1	1	1	1	1	1	1	1	0	1	1	1	0	1	0	1	1	1	0	1	1	1	1
O. sativa	IRIS_313-11913	GJ-trp	GJ-trop1	0	0	0	1	0	1	0	0	0	1	0	0	1	0	0	0	0	0	nocov	0	0	0	0	0	0	1	nocov	1	0	nocov	0	0	0	nocov	0	1	0	1	0	nocov	1	0	1	0	0	0
O. sativa	IRIS_313-11914	XI-2	XI-2	1	1	1	0	1	1	1	1	1	1	0	1	1	0	1	1	1	1	1	1	1	1	1	1	1	0	1	1	1	1	1	0	0	nocov	0	0	nocov	1	1	nocov	1	1	1	1	1	1
O. sativa	IRIS_313-11915	GJ-trp	GJ-trop1	nocov	0	1	1	0	nocov	0	0	0	1	0	0	1	nocov	0	0	0	0	nocov	0	0	0	0	0	0	0	nocov	1	0	nocov	0	0	0	nocov	0	1	0	1	0	0	0	0	1	0	0	0
O. sativa	IRIS_313-11916	XI-2	XI-2	1	1	1	0	1	1	1	1	0	0	nocov	1	1	1	1	1	1	0	1	1	1	0	1	1	1	1	1	1	1	1	0	1	1	1	1	0	0	1	1	nocov	1	1	1	1	1	1
O. sativa	IRIS_313-11917	cA(Aus)	cA1	1	1	1	0	1	nocov	1	1	1	0	0	nocov	1	1	1	1	1	0	1	1	1	1	0	0	0	0	nocov	1	1	0	0	0	0	1	nocov	0	0	0	1	nocov	1	1	1	1	0	1
O. sativa	IRIS_313-11918	XI-2	XI-2	1	0	1	0	1	1	1	1	1	1	1	1	1	1	1	1	1	1	1	1	1	1	1	1	1	1	1	1	1	1	1	1	1	1	1	0	0	1	1	1	1	1	1	1	1	1
O. sativa	IRIS_313-11919	XI-2	XI-2B	1	0	1	0	1	1	1	1	1	1	1	1	1	1	1	1	1	1	1	1	1	1	1	1	1	1	1	1	1	1	1	1	1	0	0	0	0	1	1	nocov	1	1	1	1	1	1
O. sativa	IRIS_313-11920	XI-adm	XI-2A	1	0	0	0	1	1	1	1	1	1	1	1	1	1	1	1	0	1	1	1	1	1	1	1	1	1	1	1	1	1	1	1	1	1	1	0	1	1	1	nocov	1	1	1	1	1	1
O. sativa	IRIS_313-11921	XI-3	XI-3B1	1	1	1	0	1	1	1	1	1	1	1	1	1	1	1	1	0	1	1	1	1	1	1	1	1	1	1	1	1	1	1	1	0	1	1	0	1	0	1	1	1	0	1	1	1	1
O. sativa	IRIS_313-11922	GJ-sbtrp	GJ-subtrp	0	1	1	1	0	0	0	0	0	0	0	0	1	0	0	0	0	0	nocov	0	0	0	0	0	0	0	nocov	nocov	1	nocov	0	0	0	nocov	0	1	0	0	1	0	0	0	0	0	0	0
[truncated: 1,461 more rows]
[truncated: 708 more columns]
