# Supplementary material for: Continuous infiltration and evolutionary trajectory of nuclear organelle DNA inOryza
Source: HighWire-hosted journal article supplement (doi:10.1101/gr.279609.124), 2025-04-25
Supplement: Supplemental_Table_S5.xlsx [file Supplemental_Table_S5.xlsx]

## Sheet: Supplementary Table 5
Supplemental Table 5. Presence frequency of 754 ONGs in 3458 accessions.
ONG ID	O. sativa															O. glaberrima	O. barthii
	GJ-temp	GJ-subtrp	GJ-trop1	GJ-trop2	XI-1A	XI-1B1	XI-1B2	XI-2A	XI-2B	XI-3A	XI-3B1	XI-3B2	cA1	cA2	cB
ONG0100110	0.972881	0.99115	0.977346	1	0.0204082	0.046875	0.047619	0.0145985	0.038835	0.0441989	0.003861	0.0114943	0.0210526	0.0416667	0.533333	0.00298507	0
ONG0100220	0.911864	0.150442	0.0291262	0	0	0	0	0	0.00970874	0	0	0	0.221053	0.0416667	0.0133333	0	0
ONG0100330	0.922034	0.893805	0.7411	0.518519	0.0255102	0.015625	0.015873	0.080292	0.0194175	0.00552486	0.015444	0.0344828	0.0105263	0.0138889	0.626667	0.00298507	0
ONG0100380	0.976271	0.150442	0.957929	1	0.0153061	0	0	0	0.00970874	0.0110497	0	0	0.431579	0.0416667	0.36	1	1
ONG0100430	0.976271	0.858407	0.954693	1	0.0102041	0.015625	0	0.0145985	0.0582524	0.0110497	0.003861	0	0.515789	0.0277778	0.946667	0.00597015	0
ONG0100500	1	0.451327	1	0.240741	0.994898	0.78125	1	0.992701	0.92233	0.939227	0.996139	1	0.978947	0.986111	1	0.250746	0.17
ONG0100580	1	1	1	1	1	1	1	1	1	1	1	1	1	1	1	0.00895522	0
ONG0100760	0.969492	0.716814	0.796117	0.296296	0.00510204	0.015625	0.015873	0	0	0.0165746	0.00772201	0.0114943	0.0105263	0.0138889	0.293333	0.00298507	0
ONG0100770	1	1	1	1	1	1	1	1	1	1	1	1	1	1	1	0.00597015	0
ONG0100830	1	1	1	1	1	1	1	1	1	1	1	1	1	1	1	0.00597015	0
ONG0100880	1	1	0.996764	1	0.994898	1	0.984127	1	1	0.994475	1	1	0.989474	1	1	0.00597015	0
ONG0101010	0.966102	1	0.954693	1	0.0102041	0.015625	0	0	0	0.0883978	0.003861	0.0114943	0	0	0.933333	0.00298507	0
ONG0101040	0.925424	1	0.996764	0.037037	0.994898	1	1	0.985401	1	1	1	1	1	1	0.546667	0.00597015	0
ONG0101150	0.989831	0.99115	0.909385	0.851852	0.0510204	0	0.015873	0.00729927	0.00970874	0.00552486	0.011583	0.126437	0.757895	0.0277778	0.08	0.00298507	0
ONG0101160	0.989831	0.99115	0.977346	1	0.984694	0.921875	0.968254	0.992701	1	0.98895	0.996139	0.988506	0.968421	0.986111	1	0.00597015	0
ONG0101170	0.762712	0.168142	0.0485437	0.0740741	0.331633	0.15625	0.047619	0.0583942	0.00970874	0.276243	0.196911	0.712644	0.536842	0	0.866667	0	0
ONG0101220	0.667797	0	0.0355987	0	0.260204	0.015625	0.015873	0.0364964	0.00970874	0.18232	0.185328	0.494253	0.663158	0	0.866667	0.00597015	0.01
ONG0101260	0.20678	0.221239	0.145631	0.518519	0.989796	0.90625	0.920635	0.80292	0.970874	0.878453	0.899614	0.931034	0.136842	0.138889	0.146667	0.00895522	0
ONG0101270	0.00338983	0.460177	0.297735	0.111111	0.913265	0.90625	1	0.49635	0.543689	0.762431	0.791506	0.885057	0.978947	0.916667	0.533333	0.997015	1
ONG0101280	0.105085	0.106195	0.278317	0.555556	1	0.984375	1	0.934307	0.990291	0.994475	1	0.988506	1	1	0.426667	0.00298507	0
ONG0101290	0.0711864	0.00884956	0.0161812	0	0.954082	1	1	1	1	0.895028	0.992278	0.977011	1	0.958333	0.16	0.740299	0.92
ONG0101310	0.0305085	0	0.0485437	0	0.994898	0.765625	1	0.985401	0.873786	0.994475	1	1	0.484211	0.805556	0.0933333	0.0447761	0.02
ONG0101320	0.0135593	0	0.0355987	0.0555556	0.755102	0.703125	0.666667	0.868613	0.893204	0.839779	0.907336	0.735632	0.663158	0.861111	0.786667	0.00298507	0
ONG0101330	0.0576271	0.0176991	0.0614887	0	0.994898	0.953125	1	0.985401	1	0.745856	1	0.91954	1	1	0.973333	0.00298507	0
ONG0101340	0.0508475	0.00884956	0.038835	0	1	1	1	0.992701	0.980583	0.955801	1	1	0.978947	0.236111	0.133333	0.00298507	0
ONG0101370	0.0135593	0.00884956	0.0355987	0	0.704082	0.953125	0.952381	0.941606	0.728155	0.756906	0.594595	0.758621	0.0526316	0.0138889	0.08	0	0
ONG0101380	0.0305085	0.00884956	0.012945	0	0.734694	0.984375	0.968254	0.868613	0.650485	0.81768	0.57529	0.632184	0	0.125	0.0666667	0.00298507	0
ONG0101410	0.0271186	0	0.0453074	0	0.44898	0.21875	0.761905	0.883212	0.805825	0.983425	0.972973	0.954023	0.452632	0.763889	0.08	0.00298507	0
ONG0101420	0	0	0.00323625	0	0.0408163	0.015625	0.047619	0.10219	0.0679612	0.0497238	0.0694981	0.0344828	0	0.0555556	0	0	0
ONG0101490	0.311864	0.902655	0.915858	0.833333	0.877551	0.5	0.0793651	0.0437956	0.281553	0.0220994	0.042471	0.597701	0.505263	0.0277778	0.106667	0.00298507	0
ONG0101500	0.00338983	0.00884956	0.0582524	0	0.933673	0.703125	0.952381	0.313869	0.330097	0.121547	0.277992	0.528736	0.631579	0.263889	0.0133333	0	0
ONG0101530	0.0101695	0	0.00970874	0.0185185	0.852041	0.75	0.238095	0.080292	0	0.00552486	0.0888031	0.0689655	0	0.208333	0	0	0
ONG0101540	0.0271186	0.00884956	0.812298	0.962963	0.617347	0.03125	0.0793651	0.0145985	0.00970874	0.0883978	0.0617761	0.206897	0.0526316	0.0694444	0.0133333	0	0
ONG0101560	0	0	0	0	0.219388	0	0.047619	0	0	0	0	0.0229885	0	0	0	0	0
ONG0101570	0.00338983	0	0.0453074	0	0.00510204	0.015625	0	0	0	0	0	0	0	0	0	0	0
ONG0101580	0.118644	0.840708	0.889968	0.0555556	0.0153061	0.046875	0.015873	0.00729927	0.116505	0.149171	0.00772201	0.0114943	0.905263	0.972222	0.573333	0.00298507	0
ONG0101590	0.0644068	0.530973	0.915858	0.518519	0.0153061	0.03125	0	0	0.00970874	0.0331492	0.00772201	0.0344828	0.0105263	0	0	0	0
ONG0101600	0.0576271	0.769912	0.828479	0.518519	0.0153061	0.03125	0	0.0145985	0.038835	0.132597	0.111969	0.091954	0.0210526	0	0	0	0
ONG0101610	0.0372881	0.548673	0.213592	0.481481	0.556122	0.375	0.0952381	0.489051	0.631068	0.674033	0.760618	0.827586	0.989474	0.986111	0.933333	0.00298507	0
ONG0101620	0.383051	0.902655	0.0873786	0	0	0	0.015873	0	0.0194175	0.00552486	0.003861	0	0.957895	0.138889	0.826667	0.113433	0.09
ONG0101650	0	0	0.00323625	0	0	0	0.031746	0.0583942	0.368932	0.00552486	0.011583	0	0.842105	0.972222	0.0266667	0	0
ONG0101680	0.0101695	0.0265487	0.00647249	0	0.0255102	0	0	0.0291971	0.291262	0.0718232	0.0810811	0	0.873684	0.833333	0	0.00597015	0.01
ONG0101690	0	0	0	0	0	0	0	0	0	0	0	0	0	0	0	0	0.04
ONG0101720	0.291525	0.0884956	0.621359	0.185185	0.00510204	0.015625	0	0.00729927	0.00970874	0.0110497	0	0	0	0	0.293333	0	0
ONG0101730	0	0	0	0	0	0	0	0.00729927	0	0	0	0	0	0	0.133333	0.232836	0.24
ONG0101740	0.0169492	0	0.012945	0	0.596939	0.546875	0.222222	0.10219	0.126214	0.359116	0.208494	0.344828	0.0105263	0.0138889	0.0133333	0	0
ONG0101770	0	0	0	0	0	0.28125	0	0	0.0194175	0	0	0	0	0	0	0.00298507	0
ONG0101810	0.00677966	0.00884956	0	0	0.693878	0.09375	0.0952381	0.744526	0.776699	0.668508	0.818533	0.804598	0	0.0416667	0.04	0	0
ONG0101820	0	0	0.00323625	0	0.0153061	0.234375	0.0793651	0.481752	0.038835	0.298343	0.544402	0.632184	0	0	0.0133333	0	0
ONG0101830	0.00338983	0	0.0161812	0	0.0357143	0.65625	0	0.19708	0.0679612	0.149171	0.0617761	0.045977	0.105263	0.0138889	0	0	0
ONG0101840	0	0	0	0	0	0	0	0	0	0	0.027027	0	0	0	0	0	0
ONG0101850	0	0	0	0	0	0	0	0	0	0.038674	0	0	0	0	0	0	0
ONG0101860	0	0	0	0	0	0	0	0.0145985	0.0485437	0	0	0	0.210526	0.361111	0	0	0
ONG0101870	0.0711864	0.840708	0.0453074	0	0.00510204	0	0	0	0	0	0.003861	0	0.0105263	0	0	0.00298507	0
ONG0101880	0	0	0	0	0	0	0	0.00729927	0	0	0	0	0	0	0	0	0
ONG0101910	0	0	0	0	0	0	0	0	0	0	0	0	0	0	0	0.725373	0.4
ONG0101920	0	0	0.00323625	0	0	0	0	0	0	0	0	0	0	0	0	0.997015	1
ONG0101930	0	0	0	0	0	0	0	0	0	0	0	0	0	0	0	0.967164	0.82
ONG0101950	0	0	0.00323625	0	0	0	0	0	0	0	0	0	0	0	0	0.997015	1
ONG0101960	0	0	0.00323625	0	0	0	0	0	0	0	0	0	0	0	0	0.997015	1
ONG0101990	0	0	0	0	0	0	0	0	0	0	0	0	0	0	0	1	1
ONG0102000	0	0	0	0	0	0	0	0	0	0	0	0	0	0	0	0.997015	1
ONG0102010	0	0	0	0	0	0	0	0	0	0	0	0	0	0	0	1	1
ONG0102060	0	0	0	0	0	0	0	0	0	0	0	0	0	0	0	0.98806	0.35
ONG0102090	0	0	0	0	0	0.046875	0	0	0	0	0	0	0	0	0	0.997015	1
ONG0102110	0	0	0	0	0	0	0	0	0	0	0	0	0	0	0	0.695522	0.65
ONG0102140	0	0	0	0	0	0	0	0	0	0	0	0	0	0	0	0.934328	0.88
ONG0102160	0	0	0	0	0	0	0	0	0	0	0	0	0	0	0	1	1
ONG0102170	0	0	0	0	0	0	0	0	0	0	0	0	0	0	0	0.468657	0.18
ONG0102180	0	0	0	0	0	0	0	0	0	0	0	0	0	0	0	0.0238806	0
ONG0102190	0	0	0	0	0	0	0	0	0	0	0	0	0	0	0	0.991045	0.43
ONG0102200	0	0	0	0	0	0	0	0	0	0	0	0	0	0	0	0.892537	0.94
ONG0102210	0	0	0	0	0	0	0	0	0	0	0	0	0	0	0	1	0.92
ONG0102220	0	0	0	0	0	0	0	0	0	0	0	0	0	0	0	0.997015	0.98
ONG0102230	0	0	0	0	0	0	0	0	0	0	0	0	0	0	0	0.997015	1
ONG0102240	0	0	0	0	0	0	0	0	0	0	0	0	0	0	0	0.970149	0.51
ONG0102260	0	0	0	0	0	0	0	0	0	0	0	0	0	0	0	0.985075	0.19
ONG0102270	0.0135593	0.0265487	0.0194175	0	0.0153061	0.015625	0.015873	0.0218978	0.0582524	0.0110497	0.03861	0.045977	0	0.0138889	0.0266667	0.322388	0.21
ONG0102280	0	0	0	0	0	0	0	0	0	0	0	0	0	0	0	1	1
ONG0102290	0	0	0	0	0	0	0	0	0	0.0110497	0	0	0	0	0	0.973134	0.99
ONG0102300	0	0	0	0	0	0	0	0	0	0	0	0	0	0	0	1	1
ONG0102310	0	0	0	0	0	0	0	0	0	0	0	0	0	0	0	0.997015	0.84
ONG0102320	0	0	0	0	0	0	0	0	0	0	0	0	0	0	0	0.958209	0.99
ONG0102330	0	0	0	0	0	0	0	0	0	0	0	0	0	0	0	1	1
ONG0102340	0	0	0	0	0	0	0	0	0	0	0	0	0	0	0	0.238806	0.38
ONG0102350	0	0	0	0	0	0	0	0	0	0	0	0	0	0	0	0.00298507	0.16
ONG0102380	0	0	0	0	0	0	0	0	0	0	0	0	0	0	0	0.507463	0.7
ONG0102400	0	0	0	0	0	0	0	0	0	0	0	0	0	0	0	0	0.12
ONG0102410	0	0	0	0	0	0	0	0	0	0.00552486	0	0.0114943	0	0	0	0.307463	0.64
ONG0102420	0	0	0	0	0	0	0	0	0	0	0	0	0	0	0	0.0447761	0.36
ONG0200060	0.857627	0.831858	0.100324	0	0.326531	0.375	0.15873	0.875912	0.621359	0.392265	0.737452	0.528736	0.705263	0.916667	0.0266667	0.0358209	0
ONG0200070	0.976271	0.876106	1	1	0.897959	1	0.984127	0.970803	0.825243	0.944751	0.988417	0.988506	0.231579	0.0972222	0.973333	0.00597015	0
ONG0200140	1	1	1	1	1	1	1	1	1	1	1	1	1	1	1	0.00597015	0
ONG0200440	0.983051	0.238938	0.404531	0	0.0204082	0.453125	0.0634921	0.364964	0.0194175	0.0165746	0.003861	0.0229885	0.0105263	0.0694444	0.253333	0	0
ONG0200480	0.986441	1	0.977346	1	0.362245	0.484375	0.111111	0.233577	0.271845	0.392265	0.0772201	0.195402	1	0.944444	1	0.00597015	0
ONG0200540	0.986441	0.99115	0.864078	1	0.158163	0.015625	0	0.00729927	0.203883	0.0441989	0.003861	0.103448	0	0	0.733333	0.00298507	0
ONG0200800	0.99661	1	1	1	0.0102041	0.03125	0.015873	0	0.00970874	0.0220994	0.003861	0	0.0947368	0.166667	0.133333	0.00298507	0
ONG0200850	0.979661	1	0.993528	0.962963	0.0102041	0	0.047619	0.00729927	0	0	0.003861	0	0	0	0.693333	0.00298507	0
ONG0200860	1	1	1	1	1	1	1	0.992701	1	1	1	1	1	0.930556	0.973333	0.0208955	0
ONG0200910	0.138983	0.433628	0.822006	1	0.994898	1	1	0.992701	1	1	1	1	1	1	0.893333	0.00597015	0
ONG0200980	0.111864	0.079646	0.0550162	0	1	1	1	0.992701	1	0.994475	1	0.977011	1	1	0.0533333	0.997015	1
ONG0200990	0.0508475	0.00884956	0.0485437	0	0.989796	0.96875	1	0.970803	0.961165	0.994475	0.984556	0.942529	0.936842	0.347222	0.12	0	0
ONG0201010	0.105085	0	0.443366	0.0740741	0.97449	1	1	0.722628	0.941748	0.98895	0.876448	0.954023	0.831579	0.194444	0.133333	0.00298507	0
ONG0201020	0.0474576	0.0176991	0.0291262	0	0.994898	1	1	0.992701	0.980583	0.98895	1	0.965517	0.157895	0.555556	0.08	0.041791	0
ONG0201030	0.0745763	0.00884956	0.0226537	0.0185185	0.984694	0.96875	0.984127	0.547445	0.805825	0.756906	0.776062	0.873563	0.0210526	0.0416667	0.08	0.00298507	0
ONG0201150	0.00677966	0.00884956	0.02589	0	0.326531	0.140625	0.111111	0.379562	0.31068	0.834254	0.814672	0.528736	0.515789	0.0833333	0.0133333	0.00298507	0
ONG0201160	0.0135593	0.00884956	0.00323625	0	0.505102	0	0.031746	0	0	0	0.003861	0	0	0	0	0	0
ONG0201190	0	0.0442478	0.10356	0	0	0	0	0	0	0	0	0	0	0	0	0	0
ONG0201200	0.128814	0.513274	0.644013	0.981481	0.00510204	0	0	0	0	0.0110497	0	0	0	0.0138889	0.08	0	0
ONG0201210	0	0	0.0161812	0	0.193878	0.4375	0.111111	0.525547	0.213592	0.00552486	0.011583	0.0114943	0.663158	0.958333	0.08	0.00298507	0
ONG0201250	0	0	0	0	0	0	0	0.00729927	0	0	0	0	0	0	0.706667	0	0
ONG0201260	0	0	0	0	0	0	0	0.00729927	0.0291262	0	0	0	0	0.0138889	0.373333	0	0
ONG0201270	0.0881356	0	0.433657	0.0555556	0.969388	0.90625	0.904762	0.941606	0.92233	0.895028	0.92278	0.954023	0.884211	0.888889	0.973333	0.98209	0.99
ONG0201280	0	0	0	0	0	0	0	0	0.00970874	0	0	0	0	0	0	0	0
ONG0201300	0	0	0	0	0	0	0	0.0218978	0.00970874	0	0	0.0114943	0	0	0	0	0.02
ONG0201320	0	0	0	0	0	0	0	0	0	0	0	0.045977	0	0	0	0	0
ONG0201330	0	0	0.00323625	0	0.00510204	0.421875	0.126984	0.613139	0.135922	0.480663	0.220077	0.229885	0	0	0.0266667	0	0
ONG0201350	0	0	0.00323625	0	0	0.046875	0.0793651	0.116788	0.0485437	0.469613	0.521236	0.241379	0.0105263	0	0	0	0
ONG0201360	0.0135593	0	0.0420712	0	0.107143	0.015625	0.015873	0.0656934	0.174757	0.0220994	0.030888	0.264368	0	0	0	0	0
ONG0201380	0	0	0	0	0	0	0	0.116788	0	0.303867	0.235521	0.0114943	0	0	0.0133333	0	0
ONG0201390	0	0	0	0	0	0	0	0.145985	0	0.370166	0.235521	0	0	0	0.0133333	0	0
ONG0201400	0.0237288	0.0884956	0.148867	0.12963	0.0102041	0.046875	0.031746	0.0364964	0.106796	0.0939227	0.0501931	0.0574713	0.0105263	0.0277778	0	0	0
ONG0201420	0	0	0	0	0	0	0	0	0	0.0497238	0	0	0	0	0	0	0
ONG0201430	0	0	0	0	0	0	0	0.0364964	0.038835	0	0	0	0.284211	0.638889	0.0133333	0.0328358	0.01
ONG0201450	0	0	0.0226537	0	0.188776	0.421875	0.111111	0.49635	0.203883	0.0110497	0.00772201	0.0114943	0.547368	0.972222	0.0933333	0	0
ONG0201460	0	0	0	0	0	0	0	0	0.15534	0	0.003861	0	0.147368	0.277778	0	0	0
ONG0201470	0.00338983	0	0.012945	0	0.00510204	0.109375	0.031746	0.394161	0.174757	0.41989	0.0849421	0.045977	0.873684	0.847222	0.0133333	0	0
ONG0201490	0.0440678	0.504425	0.00970874	0	0.658163	0.515625	0.47619	0.175182	0.320388	0.546961	0.467181	0.551724	0.515789	0.152778	0.0133333	0.949254	0.98
ONG0201500	0.00677966	0.663717	0	0	0	0	0	0	0	0	0.003861	0.0114943	0	0	0	0	0
ONG0201510	0.020339	0	0	0	0	0.4375	0.0634921	0.328467	0.00970874	0.0165746	0.003861	0.0114943	0.0105263	0.0555556	0.253333	0.997015	1
ONG0201520	0.00677966	0.00884956	0.00647249	0	0.102041	0.1875	0.015873	0.525547	0.213592	0.0994475	0.0733591	0.0114943	0	0	0.0533333	0	0
ONG0201550	0.00677966	0	0	0	0.0204082	0.4375	0.031746	0.116788	0.135922	0.342541	0.27027	0.0114943	0	0	0.0133333	0.0149254	0.01
ONG0201560	0	0	0	0	0	0	0	0	0	0	0	0	0	0	0	0.546269	0.21
ONG0201570	0	0	0	0	0	0	0	0	0	0	0	0	0	0	0	0.997015	1
ONG0201580	0	0	0	0	0	0	0	0	0	0	0	0	0	0	0	0.997015	0.82
ONG0201590	0	0	0	0	0	0	0	0	0	0	0	0	0	0	0	0.838806	0.27
ONG0201610	0	0	0	0	0	0	0	0	0	0	0	0	0	0	0	0.99403	0.86
ONG0201620	0	0	0	0	0	0	0	0	0	0	0	0	0	0	0	1	1
ONG0201630	0	0	0	0	0	0	0	0	0	0	0	0	0	0	0	0.997015	1
ONG0201680	0	0	0	0	0	0	0	0	0	0	0	0	0	0	0	0.740299	0.51
ONG0201690	0	0	0	0	0	0	0	0	0	0	0	0	0	0	0	0.997015	1
ONG0201720	0	0	0	0	0	0	0	0	0	0	0	0	0	0	0	0.997015	1
ONG0201730	0	0	0	0	0	0	0	0	0	0	0	0	0	0	0	1	1
ONG0201750	0	0	0	0	0	0	0	0	0	0	0	0	0	0	0	1	1
ONG0201760	0	0	0	0	0	0	0	0	0	0	0	0	0	0	0	0.997015	1
ONG0201780	0	0	0	0	0	0	0	0	0	0	0	0	0	0	0	0	0
ONG0201790	0	0	0	0	0	0	0	0	0	0	0	0	0	0	0	0.98806	1
ONG0201810	0	0	0	0	0	0	0	0	0	0	0	0	0	0	0	1	1
ONG0201830	0	0	0	0	0	0	0	0	0	0	0	0	0	0	0	0.208955	0.12
ONG0201840	0	0	0	0	0	0	0	0	0	0	0	0	0	0	0	0.0567164	0.01
ONG0201850	0	0	0	0	0	0	0	0	0	0	0	0	0	0	0	0.104478	0.02
ONG0201860	0	0	0	0	0	0	0	0	0	0	0	0	0	0	0	0.802985	0.33
ONG0201870	0	0	0	0	0	0	0	0	0	0	0	0	0	0	0	1	1
ONG0201890	0	0	0	0	0	0	0	0	0	0	0	0	0	0	0	1	1
ONG0201900	0	0	0	0	0	0	0	0	0	0	0	0	0	0	0	1	1
ONG0201910	0	0	0	0	0	0	0	0	0	0	0	0	0	0	0	1	1
ONG0201930	0	0	0	0	0	0	0	0	0	0	0	0	0	0	0	0.856716	0.33
ONG0201940	0	0	0	0	0	0	0	0	0	0	0	0	0	0	0	0.256716	0.25
ONG0201950	0	0	0	0	0	0	0	0	0	0	0	0	0	0	0	0.99403	1
ONG0201980	0	0	0	0	0	0.015625	0	0	0	0	0	0	0	0	0	0.776119	0.27
ONG0202040	0	0	0	0	0	0	0	0	0	0	0	0	0	0	0	0	0.41
ONG0202050	0	0	0	0	0	0	0	0	0	0	0	0	0	0	0	0.152239	0.39
ONG0202060	0	0	0	0	0	0	0	0	0	0	0	0	0	0	0	0	0.13
ONG0202070	0	0	0	0	0	0	0	0	0	0	0	0	0	0	0	0.937313	0.96
ONG0202080	0	0	0	0	0	0	0	0	0	0	0	0	0	0	0	0.0507463	0.58
ONG0202120	0	0	0	0	0	0	0	0	0	0	0	0	0	0	0	1	1
ONG0202130	0	0	0	0	0	0	0	0	0	0	0	0	0	0	0	0.0895522	0.39
ONG0202140	0	0	0	0	0	0	0	0	0	0	0	0	0	0	0	0.00298507	0.21
ONG0300030	0.922034	0.938053	0.932039	0.907407	0	0	0.206349	0	0	0.00552486	0.003861	0	0.0315789	0.0138889	0.346667	0.00298507	0
ONG0300140	0.962712	1	0.87055	0.481481	0.00510204	0	0	0.00729927	0	0.0110497	0.00772201	0	0	0.0277778	0.0266667	0.00298507	0
ONG0300160	0.976271	0.849558	0.213592	0	0.0255102	0	0	0.00729927	0	0	0.003861	0.0114943	0.0210526	0	0.04	0	0
ONG0300190	0.976271	0.0707965	0.0291262	0	0.00510204	0	0	0	0	0	0.00772201	0.0229885	0	0	0.0266667	0.00298507	0
ONG0300300	0.99322	0.99115	1	1	1	1	0.984127	0.985401	1	0.983425	0.996139	1	0.989474	0.986111	1	0.0179104	0.01
ONG0300510	0.99322	1	0.990291	1	0.321429	0.03125	0.031746	0.00729927	0.0873786	0.0331492	0.204633	0.37931	0.157895	0.0833333	0.906667	0.00298507	0
ONG0300530	1	1	1	1	1	1	1	1	1	1	1	1	1	1	1	0.564179	0.68
ONG0300580	0.99661	1	0.996764	1	0.892857	0.21875	0.730159	0.927007	0.990291	0.546961	0.992278	1	1	0.833333	0.666667	0.749254	0.99
ONG0300710	1	1	0.996764	1	0.979592	0.265625	0.746032	0.766423	0.796117	0.370166	0.745174	0.781609	0.0526316	0	0.906667	0.00597015	0
ONG0300770	0.979661	1	0.967638	1	0.00510204	0	0	0.0291971	0	0.0110497	0.019305	0	0	0	0.893333	0.00298507	0
ONG0300850	1	1	0.996764	1	0.188776	0.65625	0.761905	0.218978	0	0.259669	0.158301	0.425287	0	0	0.986667	0.00298507	0
ONG0300870	0.99661	1	0.987055	1	0.00510204	0.015625	0	0.0218978	0.0291262	0.0276243	0.003861	0	0.0631579	0	1	0.997015	0.99
ONG0300900	1	1	0.996764	1	1	0.984375	1	1	0.990291	1	1	1	1	1	1	0.00597015	0
ONG0300920	0.99322	1	0.993528	1	0.0408163	0.09375	0.015873	0.10219	0.174757	0.165746	0.135135	0.045977	0.663158	0.972222	0.973333	1	1
ONG0300940	1	1	0.94822	1	0.923469	0.8125	0.809524	0.080292	0.291262	0.0552486	0.0772201	0.149425	0.357895	0.666667	0.946667	0.504478	0.69
ONG0301060	0.0305085	0	0.012945	0.0185185	0.959184	0.6875	0.68254	0.613139	1	0.0552486	0.0772201	0.425287	1	1	0.0933333	0	0
ONG0301080	0.0135593	0	0.00970874	0	0.954082	0.9375	0.984127	0.963504	0.84466	0.966851	0.988417	0.850575	0	0	0.0133333	0.00298507	0
ONG0301090	0.294915	0.150442	0.18123	0.277778	0.989796	1	1	0.992701	1	0.994475	0.996139	1	0.989474	0.458333	0.4	0.591045	0.58
ONG0301120	0.020339	0.0176991	0.472492	0.0185185	0.979592	0.75	0.968254	0.905109	0.873786	0.98895	1	0.827586	0.947368	0.888889	0.333333	0.00298507	0
ONG0301140	0.0101695	0	0.0614887	0	0.928571	0.859375	0.968254	0.525547	0.864078	0.359116	0.559846	0.632184	0.863158	0.791667	0.213333	0.0179104	0.01
ONG0301150	0.0338983	0.00884956	0.0226537	0	0.938776	0.734375	0.936508	0.525547	0.786408	0.0828729	0.598456	0.413793	0.347368	0.0416667	0.0533333	0.00298507	0
ONG0301170	0.00338983	0	0	0	0.00510204	0	0	0.131387	0.0582524	0	0	0	0.757895	0.972222	0.2	0	0
ONG0301180	0.00677966	0	0.411003	0	0.0408163	0.265625	0.015873	0.153285	0.00970874	0.0497238	0.756757	0.172414	0	0	0.0133333	0	0
ONG0301190	0	0	0.00323625	0.0740741	0.219388	0.109375	0.0634921	0.693431	0.543689	0.00552486	0.366795	0.264368	0	0	0.04	0	0
ONG0301210	0.0372881	0.530973	0.97411	1	0.688776	0.03125	0.015873	0.0218978	0	0.160221	0.015444	0.632184	0.0105263	0	0.8	0.00895522	0.02
ONG0301240	0.162712	0.0176991	0.576052	0.037037	0.933673	0.96875	0.952381	0.766423	0.776699	0.779006	0.888031	0.827586	0.0105263	0.0138889	0.16	0	0
ONG0301250	0.00338983	0	0.00970874	0	0.642857	0.59375	0.206349	0.890511	0.825243	0.39779	0.756757	0.241379	0.0526316	0.263889	0.306667	0.00298507	0
ONG0301260	0	0	0	0	0.0102041	0	0	0.0218978	0.0582524	0.0165746	0.030888	0.0114943	0.0315789	0.0277778	0.0133333	0.00597015	0
ONG0301280	0.0101695	0	0.00323625	0	0.510204	0.015625	0.015873	0.124088	0.0194175	0.0552486	0.200772	0.0229885	0.136842	0	0.04	0	0
ONG0301290	0.0135593	0	0.61165	0.574074	0	0	0	0	0.00970874	0.0331492	0.003861	0	0	0	0	0	0
ONG0301300	0.0983051	0	0.734628	0.777778	0.0204082	0	0	0.160584	0.126214	0.0331492	0.0501931	0.0804598	0.505263	0.472222	0.0933333	0.00298507	0
ONG0301340	1	1	0.996764	1	0.0357143	0.25	0.301587	0.408759	0.00970874	0.928177	0.830116	0	0.0210526	0	0.893333	0.00597015	0
ONG0301360	0.00677966	0	0.158576	0	0	0	0	0	0	0	0	0	0	0	0	0	0
ONG0301370	0	0	0.10356	0	0	0	0	0	0	0	0	0	0	0	0	0	0
ONG0301390	0.00338983	0	0	0	0	0	0	0.0729927	0.23301	0.0276243	0	0.0114943	0.715789	0.902778	0.0933333	0	0
ONG0301400	0.0305085	0	0.0291262	0	0.285714	0.34375	0.142857	0.963504	0.980583	0.872928	0.841699	0.632184	0.494737	0.986111	0.106667	0.00298507	0
ONG0301430	0	0	0	0	0	0	0	0	0	0	0	0	0	0	0.226667	0	0
ONG0301440	0.128814	0.0442478	0.631068	0.907407	0.367347	0.953125	0.936508	0.656934	0.951456	0.79558	0.706564	0.827586	0.0105263	0.208333	0.0533333	0.00298507	0
ONG0301450	0.00338983	0	0.00970874	0	0.27551	0.3125	0.0952381	0.270073	0.038835	0.40884	0.76834	0.701149	0.0315789	0	0.0266667	0	0
ONG0301460	0.00338983	0	0	0	0	0	0	0	0	0	0	0	0.0631579	0.152778	0	0	0
ONG0301470	0	0	0.00647249	0	0	0	0	0.0437956	0.0485437	0	0	0	0.673684	0.958333	0.08	0	0
ONG0301480	0	0	0.00970874	0.925926	0	0	0	0	0	0.00552486	0	0	0	0	0	0	0
ONG0301490	0	0.663717	0.00323625	0	0.00510204	0	0	0	0	0	0.003861	0	0	0	0	0.21194	0.15
ONG0301500	0	0	0	0	0	0	0	0.0218978	0	0.0497238	0.324324	0	0	0	0	0	0
ONG0301510	0.00338983	0	0	0	0.0204082	0.25	0.015873	0.0875912	0.00970874	0	0	0.16092	0	0	0	0	0
ONG0301520	0.00338983	0	0.00647249	0.0555556	0.0306122	0.109375	0.0793651	0.124088	0.126214	0.0939227	0.100386	0.045977	0	0	0	0.041791	0.01
ONG0301550	0	0	0.00323625	0	0	0	0	0	0	0	0	0	0	0	0	0.997015	1
ONG0301570	0	0	0	0	0	0	0	0	0	0.00552486	0	0	0	0	0	0.997015	1
ONG0301590	0	0	0	0	0	0	0	0	0	0.00552486	0	0	0	0	0	0.99403	0.98
ONG0301600	0	0	0	0	0	0	0	0	0	0.00552486	0	0	0	0	0	1	1
ONG0301620	0	0	0	0	0	0	0	0	0	0.00552486	0	0	0	0	0	1	1
ONG0301660	0.101695	0.0619469	0.411003	0.240741	0.443878	0.328125	0.269841	0.649635	0.543689	0.486188	0.517375	0.482759	0.442105	0.430556	0.24	1	1
ONG0301680	0	0	0.00323625	0	0	0	0	0	0	0	0	0	0	0	0	0.958209	0.54
ONG0301690	0	0	0	0	0	0	0	0	0	0	0	0	0	0	0	0.958209	0.13
ONG0301700	0	0	0	0	0	0	0	0	0	0	0	0	0	0	0	0.997015	1
ONG0301720	0	0	0	0	0	0	0	0	0	0	0	0	0	0	0	1	1
ONG0301730	0	0	0	0	0	0	0	0	0	0	0	0	0	0	0	1	0.98
ONG0301740	0	0	0	0	0	0	0	0	0	0	0	0	0	0	0	1	1
ONG0301750	0	0	0	0	0	0	0	0	0	0	0	0	0	0	0	0.674627	0.15
ONG0301760	0	0	0	0	0	0	0	0	0	0	0	0	0	0	0	1	1
ONG0301770	0	0	0	0	0	0	0	0	0	0	0	0	0	0	0	1	0.59
ONG0301800	0	0	0	0	0	0.015625	0	0	0	0	0	0	0	0	0	1	0.49
ONG0301820	0	0	0.00970874	0	0	0.015625	0	0	0	0	0	0.0114943	0	0	0	0.99403	1
ONG0301830	0	0	0.00323625	0	0	0	0	0	0	0	0	0	0	0	0	1	1
ONG0301840	0	0	0.00323625	0	0	0	0	0	0	0	0	0	0	0	0	0.98209	0.82
ONG0301850	0	0	0	0	0	0	0	0	0	0	0	0	0	0	0	0	0.54
ONG0301860	0	0	0	0	0	0	0	0	0	0	0	0	0	0	0	0	0.57
ONG0301870	0	0	0	0	0	0	0	0	0	0	0	0	0	0	0	0	0.25
ONG0301880	0	0	0	0	0	0	0	0	0	0	0	0	0	0	0	0.0119403	0.49
ONG0400010	0.525424	0	0.012945	0	0	0	0	0.0218978	0	0	0	0	0	0	0	0.191045	0.15
ONG0400270	0.867797	0.20354	0.0517799	0	0.0153061	0	0.015873	0	0.00970874	0	0	0.0229885	0.0105263	0	0	0	0
ONG0400300	0.945763	0.743363	1	1	0.0102041	0.03125	0.015873	0	0.00970874	0.0165746	0.003861	0.0229885	0	0	0.933333	0.00298507	0
ONG0400530	1	1	0.990291	1	0.0204082	0.03125	0.047619	0.0218978	0.0291262	0.0220994	0.003861	0.0344828	0.136842	0.0138889	0.64	0.00298507	0
ONG0400540	1	1	0.990291	1	0.0102041	0.046875	0.031746	0.0218978	0.0873786	0.0165746	0.003861	0.0229885	0.115789	0.0277778	0.88	0.00298507	0
ONG0400650	1	1	1	1	0.994898	1	1	1	1	1	1	1	1	1	1	0.00597015	0
ONG0400680	0.99322	1	1	1	1	0.984375	0.984127	0.80292	0.543689	0.972376	1	0.977011	0.789474	0.152778	0.96	0.99403	0.99
ONG0400780	0.99661	1	0.990291	1	0.19898	0.109375	0.0793651	0.080292	0.320388	0.138122	0.27027	0.126437	0.4	0.0694444	0.973333	0.00298507	0
ONG0400800	0.99661	1	0.996764	1	1	1	1	0.992701	0.990291	1	0.984556	1	1	1	0.986667	0.00597015	0
ONG0400830	1	1	1	1	0.989796	1	1	0.992701	1	1	1	1	1	1	0.986667	0.00597015	0
ONG0400850	0.99661	1	0.951456	1	0.255102	0.265625	0.190476	0.335766	0.0776699	0.276243	0.312741	0.252874	0.831579	0.638889	0.64	0.00298507	0
ONG0400900	0.861017	0.964602	0.92233	0.981481	0.0102041	0.03125	0.047619	0.138686	0.0582524	0.325967	0.166023	0.0344828	0.926316	0.916667	0.933333	0.00298507	0
ONG0400990	0.00338983	0	0.00647249	0	0.0408163	0.875	0.222222	0.613139	0.038835	0.955801	0.934363	0.873563	0.431579	0.319444	0.0666667	1	0.96
ONG0401010	0.00677966	0	0	0	0.19898	0.34375	0.777778	0.240876	0.631068	0.143646	0.119691	0.149425	0	0.0138889	0.0266667	0.00298507	0
ONG0401080	0.020339	0.0265487	0	0	0.270408	0.015625	0.936508	0.591241	0.378641	0.0994475	0.378378	0.655172	0.631579	0.333333	0.08	0	0
ONG0401110	0	0	0.02589	0	0.0153061	0.015625	0.031746	0.116788	0	0	0	0	0	0	0.0266667	0	0
ONG0401150	0.0305085	0	0.38835	0.0555556	0.392857	0.46875	0.825397	0.262774	0.582524	0.530387	0.227799	0.689655	0.0105263	0.0277778	0.0266667	0.00298507	0
ONG0401270	0.0813559	0.20354	0.877023	0.87037	0	0	0	0	0	0.0110497	0	0	0	0	0.0533333	0.00298507	0
ONG0401290	0.0779661	0.0353982	0.886731	0.888889	0.00510204	0	0	0	0	0.0110497	0.003861	0	0	0.0138889	0.0533333	0	0
ONG0401310	0	0	0.00323625	0	0.0102041	0.390625	0.031746	0.0218978	0.0776699	0	0	0	0.484211	0.180556	0.893333	0	0
ONG0401320	0	0	0.00647249	0	0	0	0	0.0291971	0.174757	0	0.003861	0	0.789474	0.847222	0.373333	0	0
ONG0401340	0	0	0.00323625	0	0	0.59375	0	0.131387	0.223301	0	0.0849421	0	0.568421	0.805556	0.0666667	0.00298507	0
ONG0401370	0	0	0.00323625	0	0	0	0	0.0510949	0.0291262	0	0	0	0.494737	0.333333	0.0266667	0.00298507	0
ONG0401380	0.00338983	0.115044	0.00647249	0.0185185	0	0	0	0	0.00970874	0	0.00772201	0	0	0	0.32	0	0
ONG0401390	0	0	0	0	0	0.015625	0	0	0	0	0	0	0	0	0.466667	0	0
ONG0401400	0.00338983	0.123894	0	0.037037	0	0.015625	0	0.0218978	0.00970874	0	0	0	0.484211	0.277778	0.56	0	0
ONG0401440	0.00338983	0	0.00323625	0	0	0.296875	0	0.124088	0.126214	0.375691	0.0888031	0.137931	0	0.0138889	0.0133333	0	0
ONG0401450	0	0	0	0	0	0	0	0	0	0	0	0.0574713	0	0	0	0	0
ONG0401460	0.0101695	0	0.00970874	0	0.0510204	0.28125	0.238095	0.591241	0.165049	0.834254	0.571429	0.367816	0.0105263	0	0.04	0	0
ONG0401470	0	0	0	0	0	0	0	0.00729927	0	0	0.0579151	0	0	0	0	0	0
ONG0401490	0	0	0	0	0	0	0	0	0	0.0110497	0	0	0	0	0	0	0
ONG0401500	0	0	0	0	0	0.3125	0	0.0948905	0.135922	0.0441989	0.030888	0.0574713	0	0	0.0133333	0	0
ONG0401520	0.00677966	0	0	0	0.0306122	0.03125	0.857143	0.226277	0.135922	0.0220994	0.023166	0	0.294737	0.694444	0.0266667	0	0
ONG0401530	0	0	0	0	0	0	0	0	0	0	0	0	0.0421053	0.0416667	0	0	0
ONG0401570	0	0	0	0	0	0	0	0	0	0	0	0	0	0.0833333	0	0	0
ONG0401580	0	0	0	0.333333	0	0	0	0	0	0.0110497	0	0	0	0	0	0	0
ONG0401590	0	0	0.00323625	0.351852	0	0	0	0	0	0.0165746	0	0	0	0	0	0	0
ONG0401680	0	0	0.00647249	0	0.00510204	0	0	0	0	0.00552486	0	0	0	0	0	0.898507	0.35
ONG0401710	0	0	0.00647249	0.037037	0	0	0.015873	0.306569	0.0291262	0.171271	0.185328	0	0	0	0.0133333	0.328358	0.22
ONG0401760	0	0	0.00323625	0	0	0	0	0	0	0	0	0	0	0	0	0.662687	0.61
ONG0401790	0	0	0.00323625	0	0	0	0	0	0	0	0	0	0	0	0	0.579104	0.26
ONG0401820	0	0	0	0	0	0	0	0	0	0	0	0	0	0	0	0.997015	0.82
ONG0401850	0	0	0	0	0	0	0	0	0	0	0	0	0	0	0	1	1
ONG0401900	0	0	0.00323625	0	0	0	0	0	0	0.00552486	0	0	0	0	0	0.997015	0.55
ONG0401910	0	0	0	0	0	0	0	0	0	0.00552486	0	0	0	0	0	0.973134	0.97
ONG0401960	0	0	0	0	0	0	0	0	0	0	0	0	0	0	0	0.961194	0.8
ONG0401970	0	0	0	0	0.0357143	0.015625	0.0634921	0.0218978	0	0.0165746	0.023166	0.0344828	0	0	0	0.997015	0.68
ONG0401980	0	0	0	0	0	0	0	0	0	0	0	0	0	0	0	0.841791	0.64
ONG0401990	0	0	0	0	0	0	0	0	0	0	0	0	0	0	0	1	1
ONG0402000	0	0	0	0	0	0	0	0	0	0	0	0	0	0	0	0.997015	1
ONG0402010	0	0	0	0	0	0	0	0	0	0	0	0	0	0	0	0.868657	0.87
ONG0402020	0	0	0.00323625	0	0	0	0	0	0	0	0	0	0	0	0	1	1
ONG0402030	0	0	0.00323625	0	0	0	0	0	0	0	0	0	0	0	0	0.99403	1
ONG0402050	0	0	0	0	0	0	0	0	0	0	0	0	0	0	0	1	1
ONG0402100	0	0	0	0	0	0	0	0	0	0	0	0	0	0	0	0.0179104	0.41
ONG0402120	0	0	0	0	0	0	0	0	0	0	0	0	0	0	0	0.125373	0.43
ONG0402150	0	0	0	0	0	0	0	0	0	0	0	0	0	0	0	0	0.31
ONG0500010	0.789831	0.0619469	0.0291262	0	0.0561224	0.015625	0.015873	0.00729927	0	0	0.003861	0	0	0	0	0	0
ONG0500030	0.955932	0.823009	0.938511	0.907407	0.0408163	0.046875	0.015873	0.0291971	0.145631	0.0276243	0.135135	0.0344828	0.336842	0.305556	0.64	0.958209	1
ONG0500190	0.898305	0.584071	0.194175	0.12963	0.80102	0.765625	0.301587	0.664234	0.281553	0.353591	0.216216	0.54023	0.284211	0.0416667	0.946667	1	1
ONG0500200	1	1	1	1	1	1	1	1	1	1	1	1	1	1	1	0.00597015	0
ONG0500290	0.0983051	0	0	0	0	0	0	0	0	0	0	0	0	0	0	0	0
ONG0500480	0.983051	1	1	1	0.0204082	0.0625	0	0	0.00970874	0.00552486	0.011583	0.045977	0.0105263	0.0138889	0.973333	0.00298507	0
ONG0500570	0.932203	0.300885	0.0355987	0.222222	0.0102041	0.015625	0	0.00729927	0	0.00552486	0.00772201	0.0114943	0	0	0.413333	0.441791	0.52
ONG0500630	0.0576271	0.80531	0.977346	1	0.994898	1	0.984127	0.875912	0.970874	1	1	1	0.989474	0.972222	0.8	0.99403	1
ONG0500640	0.0610169	0.80531	0.980583	1	0.994898	1	0.968254	1	1	1	1	1	1	1	0.786667	0.00597015	0
ONG0500730	0.0338983	0	0.012945	0	0.877551	0.4375	0.301587	0.635036	0.456311	0.237569	0.822394	0.83908	0.0947368	0.430556	0.0133333	0.00895522	0
ONG0500760	0.0372881	0.415929	0.0841424	0.0555556	1	0.90625	0.888889	0.430657	0.941748	0.524862	0.440154	0.965517	1	0.972222	0.12	0.00298507	0
ONG0500780	0	0	0.0938511	0	0	0.015625	0.444444	0	0	0	0	0	0.0105263	0	0	0	0.01
ONG0500810	0	0.00884956	0	0	0.0153061	0	0	0.00729927	0.0776699	0	0.019305	0.114943	0.747368	0.986111	0.853333	0	0
ONG0500830	0	0.00884956	0.00323625	0	0	0	0	0	0.106796	0	0	0	0.610526	0.958333	0	0	0
ONG0500840	0.00677966	0.0176991	0.00647249	0.0185185	0.00510204	0	0.0952381	0.0291971	0.0485437	0.254144	0.019305	0.0344828	0.905263	0.986111	0.16	0.00298507	0
ONG0500860	0.00338983	0.00884956	0.0161812	0	0.0153061	0	0.015873	0.386861	0.533981	0.198895	0.0733591	0.172414	0.536842	0.986111	0	0	0
ONG0500880	0	0	0.00323625	0	0	0	0.015873	0.00729927	0	0	0	0	0.652632	0.430556	0.0266667	0	0
ONG0500890	0	0	0.00323625	0	0	0.0625	0.0634921	0.0218978	0.300971	0	0	0	0.947368	1	0.0533333	0	0.01
ONG0500900	0	0	0.00323625	0	0	0	0.0952381	0	0	0	0	0	0.494737	0.0416667	0.0133333	0	0
ONG0500910	0	0	0.00323625	0	0	0	0	0	0	0	0	0	0.136842	0.0138889	0	0	0
ONG0500930	0	0	0	0	0	0	0	0	0	0	0.003861	0	0	0	0.92	0.00298507	0
ONG0500940	0	0	0	0	0	0.015625	0	0.00729927	0	0	0.216216	0.0344828	0	0	0	0	0
ONG0500950	0	0	0	0	0	0	0	0.0145985	0	0.00552486	0	0	0	0	0	0.00298507	0
ONG0500980	0	0	0	0	0	0	0	0	0	0	0	0	0.0105263	0.138889	0	0	0
ONG0500990	0	0	0	0	0	0	0	0	0	0	0	0	0.168421	0.666667	0.186667	0	0
ONG0501000	0	0	0	0	0.00510204	0	0.047619	0	0.0776699	0	0	0	0.694737	0.888889	0.0133333	0.0328358	0.05
ONG0501040	0	0	0	0	0	0	0	0	0	0	0	0	0	0	0	1	1
ONG0501060	0	0	0	0	0	0	0	0	0	0	0	0	0	0	0	0.641791	0.1
ONG0501160	0	0	0	0	0	0.015625	0	0	0	0	0	0	0	0	0	1	0.96
ONG0501170	0	0	0	0	0	0	0	0	0	0	0	0	0	0	0	0.98209	0.59
ONG0501190	0	0	0	0	0	0	0	0	0	0	0	0	0	0	0	0.99403	1
ONG0501200	0	0	0	0	0	0	0	0	0	0	0	0	0	0	0	0.289552	0.06
ONG0501210	0	0	0	0	0	0	0	0	0	0	0	0	0	0	0	1	1
ONG0501230	0	0	0	0	0	0	0	0	0	0	0	0	0	0	0	1	1
ONG0501240	0	0	0	0	0	0	0	0	0	0	0	0	0	0	0	1	1
ONG0501250	0	0	0	0	0	0	0	0	0	0	0	0	0	0	0	0.979104	0.69
ONG0501290	0	0	0	0	0	0	0	0	0	0	0	0	0	0	0	0.00895522	0.26
ONG0501320	0	0	0	0	0	0.015625	0	0	0	0	0	0	0	0	0	0.997015	0.91
ONG0501330	0	0	0	0	0	0	0	0	0	0	0	0	0	0	0	0	0
ONG0501340	0	0	0	0	0	0	0	0	0	0	0	0	0	0	0	0	0.08
ONG0600010	0.99661	0.99115	0.941748	0.518519	0	0.09375	0.015873	0.00729927	0.038835	0.237569	0.003861	0	0	0	0.173333	0.00298507	0
ONG0600030	1	1	0.990291	1	1	0.984375	1	0.992701	1	1	1	1	1	1	1	0.00298507	0
ONG0600080	0.966102	0.893805	0.97411	0.166667	0.464286	0.296875	0.920635	0.116788	0.174757	0.314917	0.200772	0.287356	1	0.805556	0.946667	0.00298507	0
ONG0600090	1	1	0.996764	1	1	1	1	1	1	1	1	1	1	1	1	0.00597015	0
ONG0600120	1	1	1	1	1	1	1	1	1	1	0.996139	1	1	1	1	0.00597015	0
ONG0600170	1	1	1	1	1	1	1	1	1	1	0.942085	1	1	1	1	0.00597015	0
ONG0600410	0.962712	0.973451	0.812298	0.796296	0.0102041	0	0.031746	0	0.106796	0.0165746	0.003861	0.045977	0	0.0138889	0.0133333	0.00298507	0
ONG0600420	1	1	1	1	1	1	1	1	1	1	1	1	1	1	1	0.00597015	0
ONG0600560	0.738983	0.973451	0.925566	0.740741	0.22449	0.15625	0.206349	0.416058	0.31068	0.441989	0.455598	0.264368	0.526316	0.430556	0.933333	0.0179104	0
ONG0600680	1	1	1	1	1	1	1	1	1	1	1	1	1	1	1	0.00597015	0
ONG0600710	0.966102	1	0.977346	0.851852	0.0153061	0.015625	0.047619	0.0145985	0	0.00552486	0.003861	0.0229885	0.347368	0.0833333	0.24	0.00298507	0
ONG0600720	1	1	1	1	1	1	1	1	1	1	1	1	1	1	1	0.00597015	0
ONG0600790	0.040678	0.0265487	0.168285	0.981481	0.969388	1	0.952381	0.985401	0.873786	0.972376	0.965251	0.942529	0.915789	0.819444	0.266667	0.0925373	0.04
ONG0600850	0.0576271	0.00884956	0.0355987	0.203704	0.97449	0.96875	0.809524	0.992701	0.902913	0.955801	1	0.908046	0.0315789	0.0277778	0.186667	0.00597015	0
ONG0600900	0.0305085	0.00884956	0.0161812	0.0740741	1	0.96875	0.952381	0.890511	0.825243	0.944751	0.899614	0.83908	1	0.888889	0.213333	0.00298507	0
ONG0600910	0.00677966	0	0.00647249	0.0185185	0.204082	0.796875	0.746032	0	0.0194175	0.232044	0.142857	0.471264	0.0105263	0	0	0	0
ONG0600930	0.0169492	0.00884956	0.0776699	0.0185185	0.173469	0.234375	0.111111	0.883212	0.650485	0.861878	0.629344	0.448276	0.0210526	0.0277778	0.0133333	0.00298507	0
ONG0600980	0.00677966	0	0.00970874	0	0.765306	0.109375	0.190476	0.0875912	0.106796	0.801105	0.158301	0.482759	0.863158	0.388889	0.0533333	0	0
ONG0601060	0.040678	0	0.0161812	0	0.505102	0.703125	0.873016	0.153285	0.300971	0.370166	0.687259	0.609195	0.0210526	0	0.0266667	0	0
ONG0601070	0.020339	0.00884956	0.012945	0	0.80102	0.0625	0.047619	0.291971	0.349515	0.243094	0.552124	0.551724	0.2	0.472222	0.0133333	0	0
ONG0601080	0.0237288	0	0.00970874	0	0.69898	0.171875	0.142857	0.248175	0.0582524	0.0165746	0.0849421	0.114943	0.652632	0.0277778	0.0133333	0	0
ONG0601120	0.315254	1	0.983819	1	0.0612245	0.34375	0.126984	0.0218978	0.0679612	0.546961	0.00772201	0.045977	0.978947	0.986111	1	0.997015	1
ONG0601140	0.00338983	0	0.242718	0.037037	0.0102041	0	0.111111	0.138686	0.0194175	0.0165746	0	0	0.884211	0.930556	0.186667	0	0
ONG0601150	0	0	0	0	0	0	0	0.0875912	0.0582524	0	0	0	0.515789	0.611111	0.106667	0	0
ONG0601160	0	0	0	0	0	0	0	0	0.0194175	0	0	0	0.694737	0.652778	0.573333	0	0
ONG0601170	0	0	0.00647249	0	0	0	0.047619	0.0145985	0.00970874	0	0	0	0.442105	0.694444	0.0533333	0	0
ONG0601190	0	0	0.00323625	0	0	0	0	0	0	0	0	0	0.642105	0.597222	0.0133333	0	0
ONG0601210	0	0	0.00323625	0	0	0	0	0	0	0	0	0	0.663158	0.625	0.0266667	0	0
ONG0601220	0	0	0.00647249	0	0	0	0	0.00729927	0.00970874	0	0	0	0.663158	0.625	0.0133333	0	0
ONG0601230	0	0	0	0.0185185	0.0561224	0.03125	0.015873	0.0510949	0.0679612	0.0552486	0.0540541	0.0689655	0.126316	0.0972222	0.146667	0.0746269	0.11
ONG0601240	0	0	0	0	0	0	0	0.0145985	0.00970874	0	0	0	0.505263	0.305556	0.0666667	0	0
ONG0601270	0.0135593	0.707965	0.00970874	0.037037	0.0153061	0	0.015873	0.00729927	0.0291262	0.00552486	0.011583	0.0229885	0.568421	0.152778	0.933333	0.00298507	0
ONG0601300	0	0	0	0	0	0.015625	0	0	0	0	0	0	0	0	0.906667	0	0
ONG0601310	0	0	0.00323625	0	0	0.28125	0.015873	0.313869	0.368932	0.0220994	0.023166	0.0114943	0.0631579	0.736111	0.493333	0.00298507	0
ONG0601360	0.0508475	0	0.132686	0	0.0102041	0.03125	0.015873	0.394161	0.417476	0.127072	0.239382	0.494253	0	0	0.0133333	0	0
ONG0601390	0	0	0.00323625	0	0	0.03125	0	0.0875912	0.0291262	0.337017	0.0540541	0.0114943	0	0	0	0	0.01
ONG0601410	0.00677966	0.00884956	0.00323625	0	0.244898	0.3125	0.047619	0.175182	0.368932	0.0939227	0.011583	0.264368	0.673684	0.208333	0	0	0
ONG0601420	0	0	0	0	0	0	0	0	0	0.441989	0	0	0	0	0	0	0
ONG0601440	0	0	0	0	0	0	0.111111	0.0145985	0.0291262	0	0	0	0.778947	0.277778	0.0133333	0	0
ONG0601460	0.00338983	0	0.00647249	0	0.0306122	0.234375	0.920635	0	0	0.00552486	0.003861	0	0	0	0	0	0.02
ONG0601470	0.00338983	0	0.148867	0.944444	0	0	0	0	0	0.0165746	0.003861	0	0	0	0	0	0
ONG0601500	0	0	0	0	0.0102041	0	0.015873	0.423358	0.174757	0.143646	0.389961	0.436782	0	0	0.04	0.00597015	0
ONG0601510	0.00338983	0	0	0	0	0.015625	0.031746	0.423358	0.038835	0.0276243	0.030888	0.0114943	0.0526316	0.0972222	0	0	0
ONG0601550	0	0	0.012945	0	0	0.03125	0	0	0	0	0	0	0	0	0	1	1
ONG0601570	0	0	0	0	0	0	0	0	0	0	0	0	0	0	0	0.304478	0.01
ONG0601610	0	0	0	0	0	0	0	0	0	0	0	0	0	0	0	1	0.84
ONG0601630	0	0	0	0	0	0	0	0	0	0	0	0	0	0	0	1	1
ONG0601640	0	0	0	0	0	0	0	0	0	0	0	0	0	0	0	0.955224	0.52
ONG0601650	0	0	0	0	0	0	0	0	0	0	0	0	0	0	0	0.991045	1
ONG0601660	0	0	0	0	0	0	0	0	0	0	0	0	0	0	0	0	0
ONG0601710	0	0	0	0	0	0	0	0	0	0	0	0	0	0	0	0.898507	0.13
ONG0601720	0	0	0	0	0	0	0	0	0	0	0	0	0	0	0	0.997015	0.41
ONG0601730	0.00338983	0	0.00323625	0	0.0102041	0.015625	0	0.0145985	0	0	0	0	0	0.0138889	0	1	0.97
ONG0601740	0	0	0	0	0	0	0	0	0	0	0	0	0	0	0	0.99403	0.99
ONG0601750	0	0	0	0	0	0	0	0	0	0	0	0	0	0	0	0.462687	0.65
ONG0601760	0	0	0	0	0	0	0	0	0	0	0	0	0	0	0	0.779104	0.12
ONG0601770	0	0	0	0	0	0	0	0	0	0	0	0	0	0	0	1	1
ONG0601790	0	0	0	0	0	0	0	0	0	0	0	0	0	0	0	0.925373	0.23
ONG0601800	0	0	0	0	0	0	0	0	0	0	0	0	0	0	0	1	0.99
ONG0601810	0	0	0	0	0	0	0	0	0	0	0	0	0	0	0	0.991045	0.99
ONG0601820	0	0	0	0	0	0	0	0	0	0	0	0	0	0	0	0.997015	0.99
ONG0601830	0	0	0	0	0	0	0	0	0	0	0	0	0	0	0	0.997015	0.79
ONG0601840	0	0	0	0	0	0	0	0	0	0	0	0	0	0	0	0.997015	1
ONG0601860	0	0	0	0	0	0	0	0	0	0	0	0	0	0	0	0.99403	0.31
ONG0601870	0	0	0	0	0	0	0	0	0	0	0	0	0	0	0	0	0.38
ONG0601880	0	0	0	0	0	0	0	0	0	0	0	0	0	0	0	0	0.55
ONG0601900	0	0	0	0	0	0	0	0	0	0	0	0	0	0	0	0	0
ONG0601910	0.0169492	0	0.00970874	0	0.00510204	0.015625	0.015873	0.00729927	0.00970874	0.0110497	0.003861	0.0114943	0.0105263	0.0138889	0.0133333	0.423881	0.86
ONG0601920	0	0	0	0	0	0	0	0	0	0	0	0	0	0	0	0	0.14
ONG0601930	0	0	0	0	0	0	0	0	0	0	0	0	0	0	0	0	0.07
ONG0601940	0	0	0	0	0	0	0	0	0	0	0	0	0	0	0	0.00298507	0.27
ONG0601950	0	0	0	0	0	0	0	0	0	0	0	0	0	0	0	0	0.48
ONG0601960	0	0	0	0	0	0	0	0	0	0	0	0	0	0	0	0.220896	0.77
ONG0700060	1	1	0.996764	1	1	0.984375	1	1	1	1	1	1	1	1	1	0.00597015	0
ONG0700220	0.99661	1	0.993528	0.962963	0.994898	1	1	0.992701	1	1	1	1	1	1	0.986667	0.00597015	0
ONG0700280	0.677966	1	0.964401	0	0.0102041	0	0	0	0	0.00552486	0.003861	0.0114943	0	0	0	0.00298507	0
ONG0700360	0.705085	0	0.0323625	0	0.0969388	0.046875	0.015873	0.160584	0.631068	0.237569	0.359073	0.390805	0.873684	0.291667	0.0133333	0	0
ONG0700500	0.908475	1	1	1	0.0204082	0.0625	0.0793651	0.080292	0.0291262	0.314917	0.027027	0.103448	0.0105263	0	1	0.00298507	0
ONG0700630	0.867797	0	0.0226537	0.0740741	1	0.953125	0.873016	0.79562	0.883495	0.983425	0.942085	0.931034	1	0.861111	0.92	0.00298507	0
ONG0700740	0.0271186	0	0.02589	0.0185185	1	0.953125	0.857143	0.970803	0.961165	1	1	0.885057	0.178947	0.222222	0.0666667	0.00298507	0.01
ONG0700750	0.0305085	0	0.00647249	0.0185185	0.688776	1	0.968254	0.729927	0.84466	1	0.945946	0.678161	0.0842105	0.152778	0.213333	0.00298507	0.01
ONG0700830	0.040678	0	0.0161812	0	0.994898	0.34375	0.492063	0.547445	0.281553	0.392265	0.837838	0.735632	0.789474	1	0.0533333	0.00298507	0
ONG0700840	0.020339	0	0.012945	0	0.979592	0.34375	0.492063	0.40146	0.291262	0.486188	0.795367	0.701149	0.368421	0.527778	0.0266667	0	0
ONG0700860	0.0101695	0	0.012945	0	0.413265	0.046875	0	0.459854	0.378641	0	0.015444	0.321839	0.673684	0.958333	0.08	0	0
ONG0700870	0.0101695	0	0.0161812	0	0.428571	0.203125	0.031746	0.905109	0.601942	0.563536	0.633205	0.310345	0	0.0138889	0.08	0.00298507	0.01
ONG0700880	0.416949	0.955752	0.996764	0.981481	0.872449	0.0625	0.174603	0.0145985	0.0582524	0.0220994	0.00772201	0.045977	0.831579	0.791667	0.413333	0.00298507	0
ONG0700900	0.0305085	0.141593	0.84466	0	0.00510204	0	0	0	0	0	0	0	0	0	0	0	0
ONG0700910	0.00677966	0	0.20712	0.0740741	0	0	0	0	0.0679612	0	0	0	0	0.0972222	0	0	0
ONG0700920	0.0847458	0.353982	0.614887	0	0	0	0.031746	0	0	0	0.030888	0	0.0421053	0.125	0.04	0	0
ONG0700930	0.00677966	0	0.171521	0	0	0.03125	0.015873	0	0	0	0	0	0.157895	0	0	0	0
ONG0700940	0.0101695	0.00884956	0.718447	1	0.0153061	0.03125	0.031746	0	0.0776699	0.0165746	0	0	0	0	0.0266667	0	0
ONG0700960	0	0	0.00323625	0	0	0	0	0.0145985	0.0776699	0	0	0	0.757895	0.597222	0.0133333	0	0
ONG0700980	0.0271186	0.00884956	0.00647249	0	0.459184	0.015625	0.015873	0.20438	0.038835	0.00552486	0.015444	0.183908	0.852632	0.333333	0.0266667	0	0
ONG0700990	0	0	0.00323625	0	0	0	0	0.00729927	0.0776699	0	0	0	0.736842	0.472222	0.0133333	0	0
ONG0701040	0.311864	0.00884956	0.012945	0	0	0	0	0.0218978	0	0	0	0.241379	0	0.125	0.76	0	0
ONG0701050	0	0	0	0	0	0	0	0.00729927	0	0	0	0	0	0.0972222	0.546667	0	0.01
ONG0701060	0.152542	0	0	0	0	0	0.015873	0.0145985	0.0194175	0	0	0.0114943	0.357895	0.361111	0.56	0.850746	0.96
ONG0701110	0	0	0.00323625	0	0	0.03125	0	0.0729927	0.631068	0	0.297297	0.0574713	0	0	0.0133333	0	0
ONG0701120	0	0	0	0	0.00510204	0	0	0	0	0	0	0.275862	0	0	0	0	0
ONG0701130	0	0	0	0	0.00510204	0	0.015873	0.00729927	0.0194175	0.0441989	0.15444	0.333333	0	0	0	0	0
ONG0701140	0	0	0	0	0.00510204	0.015625	0	0	0	0	0.0965251	0.229885	0	0	0	0	0
ONG0701150	0	0	0	0	0	0	0.015873	0.00729927	0	0.497238	0.189189	0	0	0	0.0266667	0	0
ONG0701160	0.0101695	0.00884956	0	0	0.0102041	0.03125	0.428571	0.20438	0.0679612	0.723757	0.200772	0.264368	0	0.0277778	0	0	0
ONG0701180	0	0	0	0	0	0	0	0	0	0	0	0	0.0105263	0.0277778	0	0	0
ONG0701190	0	0	0	0	0	0	0	0	0	0	0	0	0.0526316	0.0555556	0	0	0
ONG0701200	0	0	0	0	0	0	0	0	0	0	0	0	0.0947368	0.222222	0.0133333	0	0
ONG0701210	0	0	0	0	0	0	0	0	0	0	0	0	0.0947368	0.222222	0	0	0
ONG0701220	0	0	0	0	0	0	0	0.00729927	0.0291262	0	0	0	0.0842105	0.236111	0	0	0
ONG0701250	0.0101695	0.681416	0.00323625	0	0	0	0	0	0	0	0.003861	0	0	0	0	0.00298507	0
ONG0701280	0	0	0	0	0	0	0	0	0	0	0	0	0	0	0	0.997015	0.98
ONG0701290	0	0	0	0	0	0	0	0	0	0	0	0	0	0	0	0.961194	0.43
ONG0701300	0	0	0	0	0	0	0	0	0	0	0	0	0	0	0	1	1
ONG0701320	0	0	0	0	0	0	0	0	0	0	0	0	0	0	0	1	1
ONG0701330	0	0	0	0	0	0	0	0	0	0	0	0	0	0	0	1	0.3
ONG0701360	0	0	0	0	0	0	0	0	0	0	0	0	0	0	0	1	1
ONG0701370	0	0	0	0	0	0	0	0	0	0	0	0	0	0	0	0.140299	0
ONG0701390	0	0	0	0	0	0	0	0	0	0	0	0	0	0	0	0.99403	1
ONG0701420	0	0	0	0	0	0	0	0	0	0	0	0	0	0	0	0.997015	1
ONG0701440	0	0	0	0	0	0	0	0	0	0	0	0	0	0	0	0.997015	0.99
ONG0701450	0	0	0	0	0	0	0	0	0	0	0	0	0	0	0	0.979104	0.95
ONG0701460	0	0	0	0	0	0	0	0	0	0	0	0	0.0105263	0.0138889	0	0.99403	0.89
ONG0701490	0.00338983	0	0	0	0	0	0	0	0	0	0	0	0	0.0972222	0	1	1
ONG0701500	0	0	0	0	0	0	0	0	0	0	0	0	0	0	0	0.997015	0.32
ONG0701510	0	0	0	0	0	0	0	0	0	0	0	0	0	0	0	1	0.54
ONG0701530	0	0	0	0	0	0	0	0	0	0	0	0	0	0	0	0.447761	0.15
ONG0701560	0	0	0	0	0	0	0	0	0	0	0	0	0	0	0	0.952239	0.22
ONG0701570	0	0	0	0	0	0	0	0	0	0	0	0	0	0	0	1	1
ONG0701580	0	0	0	0	0	0	0	0	0	0	0	0	0	0	0	0.997015	1
ONG0701600	0	0	0	0	0	0	0	0.00729927	0	0	0	0	0	0	0	0.991045	1
ONG0701610	0	0	0	0	0	0	0	0	0	0	0	0	0	0	0	0.997015	1
ONG0701620	0	0	0	0	0	0	0	0	0	0	0	0	0	0	0	0.985075	0.68
ONG0701640	0	0	0	0	0	0	0	0	0	0	0	0	0	0	0	0.973134	0.81
ONG0701660	0.00338983	0	0	0	0	0	0	0	0	0	0	0	0	0	0	1	0.93
ONG0701680	0	0	0	0	0	0	0	0	0	0	0	0	0	0	0	0.910448	0.56
ONG0701700	0	0	0	0	0	0	0	0	0	0	0	0	0	0	0	0.00597015	0.14
ONG0701710	0	0	0	0	0	0	0	0	0	0	0	0	0	0	0	0	0.56
ONG0701730	0	0	0	0	0	0	0	0	0	0	0	0	0	0	0	0.00298507	0.08
ONG0701740	0	0	0	0	0	0	0	0	0	0	0	0	0	0	0	0	0.41
ONG0701750	0.00677966	0.0176991	0.0323625	0	0	0	0	0	0.00970874	0	0.003861	0	0	0	0	0.886567	0.93
ONG0701770	0	0	0	0	0	0	0	0	0	0	0	0	0	0	0	0.746269	0.92
ONG0701790	0	0	0	0	0	0	0	0	0	0	0	0	0	0	0	0	0.25
ONG0701800	0	0	0	0	0	0	0	0	0	0	0	0	0	0	0	0	0.2
ONG0701810	0	0	0	0	0	0	0	0	0	0	0	0	0	0	0	0	0.02
ONG0701820	0	0	0	0	0	0	0	0	0	0	0	0	0	0	0	0	0.39
ONG0800060	1	1	0.996764	1	1	1	0.984127	0.992701	1	0.994475	1	1	1	1	1	0.00597015	0
ONG0800070	1	1	1	1	1	1	1	1	1	1	1	1	1	0.986111	1	1	1
ONG0800190	0.99661	0.99115	0.815534	0.888889	0.984694	0.796875	1	0.459854	0.417476	0.662983	0.934363	0.954023	1	1	0.96	0.00298507	0
ONG0800290	0.922034	0.80531	0.533981	0.759259	0.994898	0.546875	0.460317	0.956204	0.902913	0.756906	0.969112	1	0.726316	0.0416667	0.16	0.149254	0.19
ONG0800470	1	1	1	0.981481	1	1	1	0.992701	1	1	1	1	0.989474	0.972222	1	0.00597015	0
ONG0800630	0.99322	0.99115	0.990291	1	0.0153061	0.015625	0	0.00729927	0.00970874	0.038674	0.003861	0.0344828	0.0631579	0.0138889	0.48	0.00298507	0
ONG0800660	0.99661	0.99115	0.987055	0.981481	0.994898	0.984375	0.984127	0.927007	0.873786	0.928177	0.926641	0.896552	0.894737	0.555556	0.96	0.00597015	0
ONG0800690	0.99322	1	0.987055	1	0.0102041	0	0.015873	0.00729927	0.038835	0.0276243	0.003861	0.0114943	0.673684	0.180556	0.0533333	0.00298507	0
ONG0800710	0.155932	0.920354	0.660194	0.166667	1	0.953125	1	0.992701	1	0.994475	0.996139	1	1	1	0.96	0.00597015	0
ONG0800760	0.0711864	0.0176991	0.0226537	0	1	0.984375	1	0.985401	0.92233	0.98895	1	1	0.526316	0.125	0.146667	0.00298507	0
ONG0800800	0.0372881	0.00884956	0.012945	0	0.770408	0.546875	0.634921	0.627737	0.805825	0.160221	0.602317	0.931034	0.831579	0.0277778	0.0933333	0	0
ONG0800810	0.00338983	0	0	0	0	0.390625	0.0793651	0	0	0.00552486	0	0	0	0	0.0133333	0.0179104	0.02
ONG0800880	0.162712	0.80531	0.789644	0.648148	0.806122	0.0625	0.031746	0.167883	0.213592	0.480663	0.579151	0.574713	0.126316	0.125	0.973333	0.0208955	0.03
ONG0800890	0.0474576	0.00884956	0.02589	0.0185185	0.954082	0.53125	0.412698	0.759124	0.912621	0.80663	0.915058	0.942529	0.0210526	0.0277778	0.0933333	0.00298507	0
ONG0800910	0.00338983	0	0	0	0.622449	0.015625	0.015873	0.0218978	0.00970874	0.0110497	0.0694981	0.264368	0.452632	0.263889	0.0133333	0	0
ONG0800940	0.0440678	0.761062	0.660194	0.185185	0.00510204	0.046875	0	0	0	0	0.00772201	0.0114943	0	0	0.906667	0.00298507	0
ONG0801000	0.240678	0.0530973	0.834951	0.0740741	0.00510204	0	0	0	0.00970874	0	0	0	0	0	0.133333	0	0
ONG0801020	0.0338983	0	0.223301	0.037037	0.367347	0.3125	0.380952	0.335766	0.349515	0.342541	0.401544	0.367816	0.294737	0.416667	0.0666667	0.835821	0.88
ONG0801030	0.586441	0.530973	0.605178	0.148148	0.0102041	0.015625	0	0	0.00970874	0	0.00772201	0	0	0	0.773333	0.00298507	0
ONG0801040	0.0135593	0.548673	0.76699	0.12963	0.00510204	0.015625	0	0	0	0	0.003861	0.0229885	0	0.0138889	0.0133333	0.00298507	0
ONG0801060	0.00338983	0	0.00970874	0	0	0.3125	0.126984	0.20438	0.504854	0.038674	0.00772201	0.0114943	0.684211	0.972222	0.973333	0	0
ONG0801080	0.0440678	0.00884956	0.00970874	0.259259	0.306122	0.28125	0.190476	0.722628	0.815534	0.839779	0.378378	0.735632	0.863158	0.75	0.44	0.00298507	0.03
ONG0801090	0	0	0.00647249	0	0	0.046875	0	0.0364964	0.271845	0.00552486	0.00772201	0.0114943	0.273684	0.666667	0.906667	0	0
ONG0801100	0.00338983	0	0.00647249	0.0185185	0.00510204	0.0625	0.015873	0.124088	0.368932	0	0.003861	0	0.957895	0.972222	0.56	0	0
ONG0801110	0.00338983	0.106195	0	0	0.0102041	0	0	0.153285	0.524272	0.0994475	0.034749	0.0114943	0.778947	0.763889	0.12	0.00597015	0
ONG0801130	0.00338983	0	0.00323625	0	0	0.046875	0.015873	0.00729927	0.165049	0.00552486	0	0	0.863158	0.305556	0.0266667	0	0
ONG0801140	0	0	0	0	0	0	0	0	0	0	0	0	0	0	0	0.128358	0.15
ONG0801150	0	0	0.00323625	0	0	0.046875	0	0	0	0.00552486	0	0	0.105263	0.0138889	0	0	0
ONG0801190	0.00677966	0	0.00323625	0	0.00510204	0.234375	0	0.489051	0.76699	0	0.027027	0.0114943	0.0105263	0.0138889	0.0266667	0.00298507	0
ONG0801200	0	0	0	0	0	0	0	0	0	0	0	0	0	0	0	0	0
ONG0801220	0	0	0	0	0	0	0	0	0	0	0.00772201	0	0	0	0	0	0
ONG0801230	0	0	0	0	0.387755	0.015625	0.015873	0.00729927	0	0.0220994	0.312741	0.149425	0	0	0	0	0
ONG0801240	0	0	0.00323625	0	0.0561224	0	0.0952381	0.124088	0.291262	0.281768	0.0888031	0.0689655	0	0	0	0	0.02
ONG0801250	0	0	0	0	0.0204082	0.0625	0.015873	0.116788	0.0194175	0.138122	0.223938	0.0344828	0	0	0	0	0
ONG0801260	0	0	0	0.0925926	0.0663265	0.03125	0	0.109489	0.038835	0.19337	0.216216	0.0574713	0	0	0.0266667	0	0
ONG0801280	0	0	0	0	0	0	0	0	0	0	0	0	0	0.0138889	0.0266667	0.00597015	0.01
ONG0801290	0	0.19469	0.0485437	0.759259	0.0102041	0	0	0	0.00970874	0.0110497	0	0	0.389474	0.0277778	0	0	0
ONG0801300	0	0	0	0	0	0	0	0	0	0	0	0	0	0	0	0.997015	1
ONG0801310	0	0	0	0	0	0.0625	0	0	0	0	0	0	0.2	0.0138889	0.0266667	0.997015	1
ONG0801360	0	0	0	0	0	0	0	0	0	0	0	0	0	0	0	0.420896	0.09
ONG0801380	0	0	0	0	0	0	0	0	0	0	0	0	0	0	0	0.99403	1
ONG0801410	0	0	0	0	0	0	0	0	0	0	0	0	0	0	0	1	1
ONG0801420	0	0	0	0	0	0	0	0	0	0	0	0	0	0	0	1	1
ONG0801440	0	0	0	0	0	0	0	0	0	0	0	0	0	0	0	0.940299	0.43
ONG0801450	0	0	0	0	0	0	0	0	0	0	0	0	0	0	0	0.853731	0.7
ONG0801480	0	0	0.00323625	0	0	0	0	0	0	0	0	0	0	0	0	0.770149	0.1
ONG0801490	0	0	0.00323625	0	0	0	0	0	0	0	0	0	0	0	0	0.555224	0.72
ONG0801500	0	0	0.00323625	0	0	0	0	0	0	0	0	0	0	0	0	0.952239	1
ONG0801510	0	0	0.00323625	0	0	0	0	0	0	0	0	0	0	0	0	1	0.92
ONG0801520	0	0	0.00323625	0	0	0	0	0	0	0	0	0	0	0	0	1	1
ONG0801540	0	0	0.00323625	0	0	0	0	0	0	0	0	0	0	0	0	0.991045	1
ONG0801560	0	0	0	0	0	0	0	0	0	0	0	0	0	0	0	0.00298507	0.07
ONG0801570	0	0	0	0	0	0	0	0	0	0	0	0	0	0	0	0.0238806	0.55
ONG0900070	0.99322	0.973451	0.993528	1	0.0255102	0.15625	0	0	0.00970874	0.0220994	0.003861	0.0114943	0	0	0.933333	0.00298507	0
ONG0900370	0.708475	0.00884956	0.0970874	0.0185185	0.0204082	0.0625	0.031746	0.0364964	0	0.0331492	0	0.0229885	0.0736842	0	0.0133333	0.868657	0.94
ONG0900520	0.99661	1	0.990291	1	0.0153061	0	0.015873	0	0.00970874	0.00552486	0.011583	0.0114943	0.147368	0.0416667	0.786667	0.00298507	0
ONG0900530	1	1	1	1	0.994898	1	1	1	1	1	0.992278	1	0.936842	0.916667	1	0.00597015	0
ONG0900540	0.986441	1	0.97411	0.0925926	0.107143	0.109375	0.0793651	0.372263	0.320388	0.121547	0.247104	0.333333	0.557895	0.958333	0.96	0.00298507	0
ONG0900590	0.0338983	0	0.0194175	0.0185185	1	1	1	0.992701	1	1	1	1	1	1	0.0933333	0.00298507	0
ONG0900600	0.0542373	0.0265487	0.0226537	0.037037	0.979592	0.890625	1	1	0.990291	0.994475	0.996139	0.988506	1	1	0.133333	0.00298507	0
ONG0900630	0.0372881	0.0353982	0.038835	0	0.984694	0.890625	1	0.992701	0.970874	0.994475	1	0.988506	0.926316	0.791667	0.106667	0.00298507	0
ONG0900640	0.0271186	0	0.0161812	0.0185185	0.989796	1	0.952381	0.992701	0.902913	1	1	1	0.842105	0.375	0.04	0.997015	1
ONG0900650	0.0271186	0	0.0161812	0	0.994898	1	0.952381	0.934307	0.961165	0.977901	1	1	0.0421053	0.0138889	0.04	0.00298507	0
ONG0900660	0.0915254	0.823009	0.84466	0.777778	0.984694	0.890625	1	0.985401	0.961165	0.994475	1	1	0.926316	0.777778	0.84	1	1
ONG0900670	0.040678	0.0353982	0.012945	0	0.959184	0.734375	0.904762	0.810219	0.68932	0.883978	0.745174	0.793103	0.663158	0.305556	0.0266667	0.0358209	0.04
ONG0900680	0.0847458	0.876106	0.0614887	0.722222	0.994898	0.734375	0.984127	0.912409	0.893204	0.983425	0.996139	0.965517	0.715789	0.486111	0.346667	0.00597015	0
ONG0900700	0.00338983	0	0.00970874	0	0.137755	0.5	0.539683	0.729927	0.68932	0.889503	0.853282	0.344828	0.705263	0.986111	0.0666667	0.00895522	0
ONG0900710	0.020339	0	0.0194175	0	0.632653	0.15625	0.603175	0.430657	0.61165	0.464088	0.494208	0.448276	0.0210526	0.0416667	0.0266667	0	0
ONG0900730	0.0237288	0	0.012945	0	0.94898	0.28125	0.238095	0.722628	0.737864	0.40884	0.888031	0.873563	0	0.0138889	0.0933333	0.0208955	0.01
ONG0900780	0.0271186	0	0.012945	0	0.872449	0.671875	0.857143	0.372263	0.747573	0.160221	0.351351	0.471264	0.294737	0.194444	0.0133333	0	0
ONG0900810	0.111864	0	0	0	0.0255102	0	0	0	0	0	0	0	0	0	0	0	0
ONG0900840	0	0	0	0	0	0	0	0	0	0	0	0	0	0	0	0	0
ONG0900850	0	0	0.00323625	0	0.00510204	0.140625	0	0.0145985	0.00970874	0	0	0	0.778947	0.930556	0	0	0
ONG0900860	0	0	0	0	0.00510204	0.1875	0.015873	0.0364964	0.00970874	0	0	0	0.642105	0.916667	0	0	0
ONG0900880	0	0.0265487	0.0485437	0.0555556	0.00510204	0.03125	0.015873	0.00729927	0.126214	0.00552486	0.0733591	0.0114943	0.821053	0.569444	0.12	0.653731	0.78
ONG0900930	0.00338983	0	0.00647249	0	0.454082	0.15625	0.571429	0.277372	0.0679612	0.110497	0.301158	0.149425	0	0	0.0266667	0	0
ONG0900940	0.00677966	0	0	0	0.153061	0.03125	0.015873	0.0218978	0.00970874	0.243094	0.177606	0.425287	0	0	0.0133333	0	0
ONG0900970	0.00338983	0	0.00647249	0	0.459184	0.109375	0.0634921	0	0	0.00552486	0.003861	0.609195	0	0	0	0	0
ONG0900980	0	0	0.00323625	0	0	0.078125	0.015873	0.0291971	0	0.160221	0.220077	0.0114943	0	0	0.0133333	0	0
ONG0900990	0	0	0	0	0	0	0	0.0875912	0	0.138122	0.196911	0.0689655	0	0.180556	0.0266667	0	0
ONG0901000	0.0169492	0	0.00970874	0	0.316327	0.09375	0.111111	0.131387	0.0873786	0.18232	0.200772	0.195402	0	0	0.0266667	0.310448	0.19
ONG0901010	0.00338983	0	0.00323625	0	0.331633	0.015625	0.015873	0	0	0.104972	0.003861	0.252874	0	0	0	0	0
ONG0901020	0	0	0	0	0	0.15625	0	0.0437956	0	0	0	0	0.147368	0.277778	0.0266667	0	0
ONG0901030	0	0	0	0	0	0.140625	0	0	0	0	0	0	0.157895	0.0833333	0	0	0
ONG0901060	0.00338983	0	0.00323625	0	0.0510204	0.1875	0	0.19708	0	0	0.019305	0.0574713	0.263158	0.291667	0.0133333	0	0
ONG0901080	0	0	0	0	0	0	0	0	0	0	0	0	0	0	0	0.997015	1
ONG0901110	0	0	0	0	0	0	0	0	0	0	0	0	0	0	0	0.379104	0.01
ONG0901130	0	0	0	0	0	0	0	0	0	0	0	0	0	0	0	0.98806	0.77
ONG0901140	0	0	0	0	0	0	0	0	0	0	0	0	0	0	0	0.20597	0.46
ONG0901170	0	0	0	0	0	0	0	0	0	0	0	0	0	0	0	0.997015	0.97
ONG0901180	0	0	0	0	0	0	0	0	0	0	0	0	0	0	0	0.886567	0.81
ONG0901190	0	0	0	0	0	0	0	0	0	0.00552486	0	0	0	0	0	0.99403	0.96
ONG0901210	0	0	0	0	0	0	0	0	0	0	0	0	0	0	0	0.997015	1
ONG0901220	0	0	0	0	0	0	0	0	0	0	0	0	0	0	0	0.946269	0.62
ONG0901230	0	0	0.00323625	0	0	0	0	0	0	0	0	0	0	0	0	1	1
ONG0901240	0	0	0.00323625	0	0	0	0	0	0	0	0.003861	0	0	0	0	0.928358	0.92
ONG0901250	0	0	0	0	0	0	0	0	0	0	0	0	0	0	0	0.997015	1
ONG0901260	0	0	0	0	0	0	0	0	0	0	0	0	0	0	0	1	1
ONG0901280	0	0	0	0	0	0	0	0	0	0	0	0	0	0	0	0.683582	0.33
ONG0901290	0	0	0	0	0	0	0	0	0	0	0	0	0	0	0	1	1
ONG0901330	0	0	0	0	0	0	0	0	0	0	0	0	0	0	0	0	0.14
ONG0901340	0.00338983	0	0.00647249	0	0	0	0	0	0	0	0	0	0	0	0.0133333	0.0358209	0.86
ONG0901360	0	0	0	0	0	0	0	0	0	0	0.003861	0	0.0105263	0	0.0133333	0.152239	0.39
ONG0901370	0	0	0	0	0	0	0	0	0	0	0	0	0	0	0	0.343284	0.61
ONG0901400	0	0	0	0	0	0	0	0	0	0	0	0	0	0	0	0	0.36
ONG1000010	0.952542	0.99115	0.938511	0.0740741	0.0102041	0.03125	0.015873	0.109489	0.00970874	0.0110497	0.003861	0.091954	0	0.0694444	0.946667	0.00298507	0
ONG1000170	0.779661	0.619469	0.498382	0.0185185	0.0357143	0	0.047619	0.00729927	0.038835	0.0276243	0.030888	0.0804598	0	0.0277778	0.04	0.0447761	0.04
ONG1000350	1	1	1	1	1	1	1	1	1	1	1	1	1	1	0.706667	0.00597015	0
ONG1000420	1	1	0.996764	1	1	1	1	1	1	1	1	1	1	1	1	0.00597015	0
ONG1000510	0.986441	1	1	1	0.0204082	0.015625	0	0.0364964	0.038835	0.0220994	0.019305	0.0229885	0.105263	0.0555556	0.893333	0.00298507	0
ONG1000590	0.0271186	0.256637	0.02589	0.037037	0.989796	0.984375	0.984127	1	1	1	1	0.977011	0.978947	0.986111	0.706667	0.0865672	0.04
ONG1000610	0.0305085	0	0.0323625	0	0.816327	1	1	0.985401	0.834951	1	0.996139	1	0.905263	0.875	0.186667	0.00597015	0
ONG1000620	0.0576271	0.0442478	0.666667	0.296296	0.969388	0.796875	0.857143	0.868613	0.970874	0.972376	1	1	0.0526316	0.486111	0.08	0.00298507	0
ONG1000630	0.155932	0.0353982	0.559871	0.0740741	1	1	0.984127	0.970803	0.805825	0.977901	1	0.931034	0.0105263	0.0833333	0.213333	0.00298507	0
ONG1000640	0.0101695	0	0.0517799	0.37037	0.933673	0.953125	0.952381	0.89781	0.893204	0.961326	0.934363	0.954023	0.0421053	0	0.04	0.00597015	0
ONG1000660	0.0542373	0.0176991	0.417476	0	0.852041	0.453125	0.174603	0.656934	0.932039	0.0662983	0.289575	0.597701	0.0842105	0.25	0.0133333	0.00298507	0
ONG1000690	0.040678	0.115044	0.0323625	0	0.790816	0.890625	0.952381	0.80292	0.990291	1	0.953668	0.965517	0.126316	0.0138889	0.04	0.00597015	0
ONG1000700	0.0576271	0	0.0291262	0	0.994898	0.984375	0.984127	1	1	1	1	0.988506	1	1	0.12	0.979104	1
ONG1000710	0.00338983	0.00884956	0.00647249	0	0.280612	0.546875	0.142857	0.153285	0.15534	0.381215	0.737452	0.517241	0	0	0	0	0
ONG1000740	0.223729	0.0973451	0.983819	1	0.693878	0.78125	0.888889	0.927007	0.699029	0.790055	0.552124	0.425287	0.0421053	0.0555556	0.12	0.00298507	0
ONG1000770	0.00677966	0.0265487	0.0194175	0	0.494898	0.234375	0	0.080292	0.533981	0.149171	0.100386	0.103448	0.978947	0.75	0.04	0	0
ONG1000780	0.00338983	0	0	0	0.673469	0.46875	0.0793651	0.0291971	0.242718	0.00552486	0.027027	0.137931	0	0.0277778	0	0	0
ONG1000820	0.00338983	0	0	0	0.438776	0	0	0	0	0	0	0	0	0	0	0	0
ONG1000840	0.210169	0.0353982	0.711974	1	0.00510204	0.015625	0	0.00729927	0.271845	0.0165746	0.011583	0.0804598	0.863158	0.416667	0.0266667	0.0746269	0.16
ONG1000860	0.00338983	0.318584	0.482201	0.277778	0.00510204	0	0	0.0218978	0	0.0110497	0	0	0	0	0.16	0.00597015	0
ONG1000880	0.0440678	0.0442478	0.0420712	0.0185185	0.352041	0.890625	0.349206	0.861314	0.912621	0.370166	0.590734	0.482759	0.989474	0.986111	0.866667	0.00597015	0.09
ONG1000900	0	0	0.00323625	0	0	0	0.015873	0.0583942	0.038835	0	0	0	0.8	0.972222	0.173333	0	0
ONG1000920	0	0	0	0	0	0	0	0.0145985	0.00970874	0	0	0	0	0	0.186667	0	0
ONG1000940	0	0	0	0	0	0.03125	0.015873	0	0.194175	0	0.015444	0	0.0105263	0	0	0	0
ONG1000950	0	0	0	0	0	0	0	0	0.0291262	0	0	0	0	0	0	0	0
ONG1000960	0.0135593	0.00884956	0.0323625	0	0.27551	0.390625	0.269841	0.372263	0.679612	0.038674	0.0888031	0.425287	0	0	0	0.316418	0.42
ONG1000970	0.00677966	0	0.00647249	0	0.0408163	0.171875	0.0634921	0.0145985	0.0194175	0.828729	0.714286	0.264368	0	0	0.04	0	0
ONG1000980	0	0	0	0	0	0.015625	0	0.0218978	0	0	0.104247	0.0229885	0	0	0.0133333	0	0
ONG1000990	0	0	0.00647249	0	0	0.015625	0	0.0218978	0.271845	0	0	0	0.0526316	0.319444	0.0133333	0	0
ONG1001030	0	0.00884956	0	0	0	0	0	0	0	0	0	0	0	0	0	0	0
ONG1001050	0	0	0	0	0	0.03125	0	0.145985	0.0194175	0	0.027027	0	0	0	0	0	0
ONG1001080	0	0	0	0	0	0	0	0	0	0	0	0	0	0	0	0.919403	0.85
ONG1001110	0	0	0	0	0	0	0	0	0	0	0	0	0	0	0	0.967164	1
ONG1001140	0.020339	0.00884956	0.0161812	0	0.403061	0.3125	0.190476	0.386861	0.61165	0.248619	0.104247	0.275862	0.242105	0.402778	0	1	1
ONG1001150	0.0576271	0.00884956	0	0	0	0	0	0.00729927	0	0	0	0	0	0.0138889	0.333333	1	1
ONG1001190	0	0	0	0	0	0	0	0	0	0	0	0	0	0	0	0.958209	0.72
ONG1001200	0	0	0	0	0	0	0	0	0	0	0	0	0	0	0	0.99403	0.42
ONG1001220	0	0	0	0	0	0	0	0	0	0	0	0	0	0	0	0.808955	0.11
ONG1001260	0	0	0	0	0	0	0	0	0	0	0	0	0	0	0	0.253731	0.29
ONG1001280	0	0	0	0	0	0	0	0	0	0	0	0	0	0	0	0.432836	0.06
ONG1001360	0	0	0	0	0	0	0	0	0	0	0	0	0	0	0	0.997015	1
ONG1001370	0	0	0	0	0	0	0	0	0	0	0	0	0	0	0	0.99403	0.94
ONG1001390	0	0	0	0	0	0	0	0	0	0	0	0	0	0	0	0.737313	0.87
ONG1001400	0	0	0	0	0	0	0	0	0	0	0	0	0	0	0	0.997015	0.76
ONG1001410	0	0	0	0	0	0	0	0	0	0	0	0	0	0	0	0.202985	0.13
ONG1001460	0	0	0	0	0	0	0	0	0	0	0	0	0	0.0138889	0	0	0.12
ONG1001470	0	0	0	0	0	0	0	0	0	0	0	0	0	0	0	0	0.26
ONG1001480	0	0	0	0	0	0	0	0	0	0	0	0	0	0	0	0.0776119	0.7
ONG1001490	0	0	0	0	0	0	0	0	0	0	0	0	0	0	0	0.0716418	0.72
ONG1001500	0	0	0	0	0	0	0	0	0	0	0	0	0	0	0	0	0.31
ONG1100030	1	1	1	1	1	1	1	1	1	1	0.996139	1	1	1	0.986667	0.00597015	0
ONG1100060	0.922034	0.920354	0.770227	0.0555556	0.00510204	0.015625	0	0	0.00970874	0.038674	0.00772201	0	0	0	0.413333	0.00298507	0
ONG1100510	0.99661	1	0.987055	1	1	1	1	1	0.990291	1	1	1	0.978947	1	1	0.00597015	0
ONG1100630	0.474576	0.159292	0.702265	0.296296	0.00510204	0	0.015873	0	0.00970874	0.0165746	0.003861	0	0	0	0	0	0
ONG1100680	0.711864	0.778761	0.546926	0.407407	0.265306	0.1875	0.936508	0.773723	0.466019	0.475138	0.849421	0.609195	0.8	0.958333	0.653333	0.00597015	0
ONG1100780	0.227119	0.168142	0.36246	0.240741	0.219388	0.015625	0.47619	0	0	0.0607735	0.015444	0.0689655	0.105263	0.0972222	0	0	0
ONG1100970	0.0135593	0	0.0323625	0.777778	0.693878	0.875	0.349206	0.781022	0.864078	0.955801	0.841699	0.896552	0.0105263	0.0833333	0.08	0.00298507	0
ONG1100990	0.020339	0	0.00647249	0	0.668367	0.359375	0.047619	0.605839	0.805825	0.0220994	0.169884	0.471264	0	0	0.0133333	0	0
ONG1101070	0.0271186	0.0442478	0.291262	0.611111	0.693878	0.984375	0.984127	0.963504	0.68932	0.535912	0.397683	0.62069	0.326316	0.152778	0.0266667	0	0
ONG1101090	0.020339	0	0	0	0.0255102	0.765625	0.809524	0	0	0.392265	0	0.0114943	0	0	0	0	0
ONG1101150	0.0779661	0	0.0420712	0.0925926	0.913265	0.9375	0.68254	0.277372	0.368932	0.276243	0.15444	0.678161	0.0421053	0.0416667	0.04	0.00895522	0
ONG1101160	0.0305085	0.00884956	0.0291262	0.0555556	0.744898	0.890625	0.047619	0.40146	0.427184	0.325967	0.53668	0.793103	0.0421053	0	0.08	0	0
ONG1101180	0.108475	0.0265487	0.0161812	0.0555556	0.653061	0.828125	0.047619	0.379562	0.407767	0.303867	0.324324	0.724138	0.0421053	0.0833333	0.04	0	0
ONG1101260	0.0305085	0.00884956	0.0355987	0.537037	0.918367	0.875	0.0634921	0.912409	0.92233	0.353591	0.698842	0.827586	0.0631579	0.291667	0.0666667	0	0
ONG1101270	0.0101695	0.00884956	0.0161812	0.518519	0.816327	0.84375	0.015873	0.927007	0.912621	0.254144	0.366795	0.689655	0	0	0.04	0.00298507	0
ONG1101300	0	0	0.00647249	0.0185185	0.505102	0.015625	0.015873	0.0218978	0.00970874	0	0.208494	0.344828	0.789474	0.25	0.0266667	0	0
ONG1101340	0	0	0.00970874	0	0	0	0	0	0	0	0	0	0	0	0	0	0
ONG1101380	0.0271186	0.115044	0.12945	0	0.377551	0.375	0.031746	0.182482	0.213592	0.0165746	0.277992	0.0574713	0.842105	0.513889	0.0133333	0	0
ONG1101400	0.00338983	0.00884956	0.0194175	0	0.0612245	0	0.0634921	0.49635	0.485437	0.038674	0.30888	0.0114943	0.305263	0.0138889	0.0266667	0	0
ONG1101410	0.0237288	0.00884956	0.012945	0	0.153061	0	0	0.0145985	0.00970874	0.0331492	0.003861	0.195402	0.642105	0.277778	0	0	0
ONG1101430	0	0	0.0161812	0	0.0918367	0.015625	0	0.175182	0.00970874	0.0441989	0.316602	0.0114943	0.578947	0.0972222	0.0266667	0	0
ONG1101440	0.0135593	0.079646	0.012945	0	0.321429	0	0	0.175182	0	0	0.108108	0.0344828	0.315789	0.0138889	0	0	0
ONG1101450	0	0	0.00323625	0	0	0	0	0	0	0	0	0	0.0210526	0	0	0	0
ONG1101470	0	0	0	0	0.00510204	0	0	0.00729927	0.0194175	0	0	0	0.273684	0.375	0	0	0
ONG1101480	0.020339	0.00884956	0.00323625	0	0.00510204	0	0	0.0656934	0.00970874	0.00552486	0	0	0.347368	0.333333	0.04	0	0
ONG1101500	0	0	0.00323625	0	0.00510204	0.671875	0.031746	0.0510949	0.194175	0	0	0.0114943	0	0.0555556	0.68	0	0
ONG1101520	0.0881356	0.256637	0.00970874	0	0.25	0.015625	0	0.0145985	0.0582524	0	0.003861	0	0.6	0.847222	0.653333	0.00298507	0
ONG1101530	0	0	0	0	0.00510204	0	0	0	0	0	0	0	0	0	0.52	0	0
ONG1101550	0.00338983	0	0	0	0	0.015625	0	0	0	0	0	0	0	0	0.786667	0	0
ONG1101570	0.00677966	0	0.0194175	0	0.0102041	0	0	0.145985	0.126214	0	0.015444	0.137931	0.0105263	0.0138889	0.0933333	0	0
ONG1101580	0.0135593	0.0353982	0.0679612	0.518519	0.0918367	0.3125	0.68254	0.124088	0.106796	0.906077	0.552124	0.252874	0.0105263	0	0.0133333	0.00298507	0
ONG1101610	0	0	0	0	0.0153061	0	0.031746	0.0291971	0	0	0.119691	0.045977	0.0315789	0.0138889	0	0	0
ONG1101620	0.00338983	0.079646	0.0841424	0.388889	0.00510204	0.4375	0.047619	0.620438	0.446602	0.209945	0.378378	0.126437	0.0526316	0.0277778	0.0266667	0	0
ONG1101640	0	0	0.00323625	0	0	0	0	0	0	0.0165746	0.0656371	0.0229885	0	0	0	0	0
ONG1101650	0.020339	0	0.012945	0	0.219388	0.0625	0.174603	0.109489	0.0194175	0.20442	0.451737	0.126437	0	0	0.0666667	0	0
ONG1101670	0.0135593	0	0.00970874	0	0.0204082	0.03125	0	0.0145985	0.038835	0.0552486	0.027027	0.0114943	0.0105263	0.0833333	0.0133333	0.370149	0.46
ONG1101720	0	0	0	0	0	0	0	0	0.00970874	0	0	0	0.326316	0.138889	0	0	0
ONG1101740	0.0169492	0	0	0	0.341837	0.015625	0.460317	0	0.00970874	0	0.003861	0.0229885	0	0	0	0	0
ONG1101780	0.0847458	0.19469	0.0291262	0.0185185	0.0153061	0	0.015873	0.0656934	0.0679612	0.232044	0.0888031	0.0804598	0.0842105	0.125	0.04	0.107463	0.11
ONG1101810	0.00338983	0	0.00323625	0	0.0102041	0.015625	0.111111	0.19708	0.23301	0.0220994	0	0	0	0.0138889	0.0133333	0	0
ONG1101820	0	0	0	0	0	0	0	0.0875912	0.00970874	0	0.003861	0	0.231579	0.625	0.0666667	0.00298507	0
ONG1101840	0	0	0	0	0	0	0	0	0	0	0	0	0	0	0	0.98806	0.67
ONG1101850	0	0	0	0	0	0	0	0	0	0	0	0	0	0	0	0.99403	1
ONG1101890	0	0	0	0	0	0	0	0	0	0.00552486	0	0	0	0	0	1	0.93
ONG1101910	0	0	0.00647249	0	0	0	0	0	0	0.00552486	0	0	0	0	0	0.820896	0.08
ONG1101930	0.00677966	0	0.00323625	0	0	0	0	0.0145985	0.0679612	0.00552486	0	0	0.684211	0.569444	0.493333	0.973134	0.99
ONG1101950	0	0	0.00647249	0	0	0	0	0	0	0	0	0	0	0	0	0.468657	0.29
ONG1101960	0	0	0.00647249	0	0	0	0	0	0	0	0	0	0	0	0	1	0.96
ONG1101990	0	0	0.00647249	0	0	0	0	0	0	0	0	0	0	0	0	0.997015	0.97
ONG1102000	0	0	0.00647249	0	0	0	0	0	0	0	0	0	0	0	0	1	0.99
ONG1102030	0	0	0.00647249	0	0	0	0	0	0	0	0	0	0	0	0	1	1
ONG1102040	0	0	0.00970874	0	0	0	0	0	0	0	0	0	0	0	0.346667	0.997015	1
ONG1102050	0	0	0.00647249	0	0	0	0	0	0	0	0	0	0	0	0	0.997015	0.75
ONG1102070	0	0	0.00647249	0	0	0	0	0	0	0	0	0	0	0	0	0.99403	0.47
ONG1102090	0	0	0.00970874	0	0	0	0	0	0	0	0	0	0	0	0	0.98806	0.84
ONG1102110	0	0	0.00970874	0	0	0	0	0	0	0	0	0	0	0	0	0.955224	0.78
ONG1102120	0	0	0	0	0	0	0	0	0	0	0	0	0	0	0	0.647761	0.08
ONG1102210	0	0	0	0	0	0	0	0	0	0	0	0	0	0	0	0.0686567	0.02
ONG1102220	0	0	0	0	0	0	0	0	0	0	0	0	0	0	0	0.602985	0.16
ONG1102230	0	0	0	0	0	0	0	0	0	0	0	0	0	0	0	0.241791	0.9
ONG1102250	0	0	0	0	0	0	0	0	0	0	0	0	0	0	0	0	0.27
ONG1102270	0	0	0	0	0	0	0	0	0	0	0	0	0	0	0	0	0.16
ONG1102290	0	0	0	0	0	0	0	0	0	0	0	0	0	0	0	0.0507463	0.73
ONG1102320	0	0	0	0	0	0	0	0	0	0	0	0	0	0	0	0.0537313	0.32
ONG1102330	0	0	0	0	0	0	0	0	0	0	0	0	0	0	0	0	0.01
ONG1102340	0	0	0	0	0	0	0	0	0	0	0	0	0	0	0	0.0955224	0.24
ONG1200060	1	1	1	1	1	0.984375	1	1	1	1	1	1	1	0.986111	1	0.00895522	0
ONG1200100	0.983051	0.106195	0.961165	1	0.0408163	0.0625	0.031746	0.0875912	0.135922	0.0220994	0.00772201	0.0229885	0.715789	0.944444	0.96	0.00298507	0
ONG1200120	1	1	1	1	1	0.96875	1	0.992701	1	1	1	1	0.989474	0.986111	0.973333	0.00597015	0
ONG1200160	0.976271	0.982301	0.967638	1	0.0612245	0.078125	0.015873	0.10219	0.15534	0.0552486	0.030888	0.0344828	0.505263	0.180556	0.973333	0.119403	0.1
ONG1200240	0.979661	0.867257	0.951456	0.981481	0.0255102	0.046875	0.015873	0.0218978	0.0194175	0.0331492	0.00772201	0.045977	0.0105263	0.0277778	0.28	0.00298507	0
ONG1200260	0.972881	0.99115	0.990291	1	0.428571	0.625	0.0952381	0.927007	0.805825	0.469613	0.660232	0.896552	0.0315789	0.0833333	0.293333	0.00597015	0
ONG1200320	0.80678	0.0973451	0.0194175	0	0.00510204	0.015625	0.015873	0	0	0	0.003861	0.0114943	0	0	0	0	0
ONG1200340	0.99661	1	1	1	0.989796	0.84375	0.206349	0.992701	0.970874	0.59116	0.625483	0.942529	1	1	1	0.00895522	0
ONG1200370	0.99661	1	1	1	0.989796	0.859375	0.222222	1	0.970874	0.596685	0.633205	1	1	1	1	1	1
ONG1200380	0.99661	1	1	1	0.989796	0.84375	0.222222	1	0.970874	0.58011	0.579151	0.91954	1	1	1	0.00597015	0
ONG1200560	0.742373	0.486726	0.0226537	0	0.0204082	0.015625	0.047619	0	0	0	0.011583	0	0	0	0	0	0
ONG1200640	0.979661	0.982301	1	0.944444	0.423469	0.0625	0.031746	0.080292	0.0485437	0.116022	0.015444	0.045977	0.757895	0.680556	0.946667	0.00895522	0
ONG1200830	0.105085	0.0442478	0.294498	0.0925926	0.892857	0.953125	0.968254	1	0.961165	0.883978	0.965251	1	0.884211	0.944444	0.106667	0.683582	0.94
ONG1200850	0.0305085	0.0176991	0.0226537	0	0.994898	1	0.968254	0.948905	0.970874	0.994475	1	1	0.610526	0.652778	0.253333	0.00298507	0
ONG1200890	0.0745763	0	0.0194175	0	0.862245	0.9375	0.904762	0.79562	0.165049	0.491713	0.725869	0.781609	0.0315789	0.0138889	0.08	0	0
ONG1200900	0.0237288	0	0.0161812	1	0.765306	0.5625	0.968254	0.569343	0.223301	0.524862	0.679537	0.655172	0	0.0138889	0.0533333	0.00298507	0.01
ONG1200950	0.0135593	0.00884956	0.00323625	0.037037	0.132653	0.0625	0.0952381	0.729927	0.15534	0.447514	0.459459	0.609195	0	0.0138889	0.0533333	0.00298507	0
ONG1200960	0.142373	0.39823	0.857605	1	0.586735	0.203125	0.142857	0.291971	0.757282	0.116022	0.189189	0.218391	0.968421	0.944444	0.746667	0.00298507	0
ONG1200980	0.020339	0.00884956	0.368932	0.0185185	0.00510204	0	0.047619	0	0	0	0	0	0	0	0	0	0
ONG1201000	0.0271186	0.00884956	0.012945	0	0.755102	0.484375	0.936508	0.262774	0.0679612	0.381215	0.0501931	0.298851	0	0.0277778	0	0.00298507	0
ONG1201010	0.040678	0.0176991	0.00970874	0	0.556122	0.328125	0.904762	0.00729927	0.00970874	0.436464	0.243243	0.091954	0.0105263	0	0.36	0	0
ONG1201020	0.0372881	0	0.0226537	0	0.576531	0.328125	0.904762	0	0.0291262	0.430939	0.250965	0.103448	0.0105263	0	0.106667	0	0
ONG1201060	0.0677966	0.486726	0.158576	0	0.658163	0.1875	0.0793651	0.408759	0.76699	0.138122	0.169884	0.229885	0.642105	0.694444	0.586667	0	0
ONG1201070	0.0542373	0.513274	0.119741	0	0.632653	0.046875	0.111111	0.182482	0.592233	0.149171	0.189189	0.241379	0.0315789	0.0138889	0.0933333	0	0
ONG1201090	0.0711864	0.150442	0.110032	0	0	0	0	0	0	0	0	0	0.0631579	0.0277778	0	0	0
ONG1201100	0.0779661	0.150442	0.113269	0	0	0	0	0	0	0	0	0	0.0631579	0.0277778	0	0	0
ONG1201180	0	0	0.00323625	0	0	0	0	0	0.0194175	0	0	0	0.705263	0.527778	0.226667	0.0179104	0.01
ONG1201190	0	0	0.00323625	0	0.00510204	0	0.015873	0.0656934	0.281553	0	0	0	0.452632	0.625	0	0	0
ONG1201200	0	0	0	0	0	0	0.015873	0	0.00970874	0	0	0	0.0842105	0.0416667	0	0	0
ONG1201230	0	0.00884956	0.00323625	0	0.0612245	0.03125	0	0.0437956	0.0582524	0.0718232	0.019305	0.045977	0.736842	0.875	0.64	0	0
ONG1201240	0	0	0	0	0	0	0	0	0	0	0	0	0	0	0.04	0.00597015	0.01
ONG1201250	0.0169492	0.00884956	0	0	0.168367	0.078125	0.857143	0.182482	0.359223	0.552486	0.610039	0.494253	0.0105263	0	0.0533333	0	0
ONG1201310	0	0	0.00323625	0	0.0459184	0	0	0	0	0	0	0.0114943	0	0	0	0	0
ONG1201320	0	0	0.00323625	0	0.0459184	0	0	0	0	0	0	0.0114943	0	0	0	0	0
ONG1201350	0.00677966	0	0	0	0.0153061	0.484375	0.793651	0	0	0.226519	0	0	0	0	0.0133333	0	0
ONG1201370	0.00338983	0	0	0	0	0.234375	0	0	0.0194175	0	0.003861	0	0	0	0	0	0
ONG1201420	0	0	0	0	0	0	0	0	0	0	0	0	0	0	0	0.516418	0.29
ONG1201430	0	0	0	0	0	0	0	0	0	0	0	0	0	0	0	0.99403	1
ONG1201450	0	0	0	0	0	0	0	0	0	0	0	0	0	0	0	0.99403	0.88
ONG1201460	0	0	0	0	0	0.015625	0	0	0	0	0	0	0	0	0	0.997015	1
ONG1201490	0	0	0	0	0	0.015625	0	0	0	0	0	0	0	0	0	0.961194	0.29
ONG1201550	0	0	0	0	0	0	0	0	0	0	0	0	0	0	0	0.81791	0.16
ONG1201570	0	0	0	0	0	0	0	0	0	0	0	0	0	0	0	0.826866	0.17
ONG1201600	0	0	0	0	0	0.015625	0	0	0	0	0	0	0	0	0	0.958209	1
ONG1201650	0	0	0	0	0	0.015625	0	0	0	0	0	0	0	0	0	0.925373	0.93
ONG1201680	0	0	0	0	0	0	0	0	0	0	0	0	0	0	0	0.185075	0.05
ONG1201710	0	0	0	0	0	0.015625	0	0	0	0	0	0	0	0	0	1	0.98
ONG1201720	0	0	0	0	0	0	0	0	0	0	0	0	0	0	0	0.955224	0.9
ONG1201740	0	0	0	0	0	0	0	0	0	0	0	0	0	0	0	0.767164	0.08
ONG1201750	0	0	0	0	0	0	0	0	0	0	0	0	0	0	0	1	1
ONG1201770	0	0	0	0	0	0.015625	0	0	0	0	0	0	0	0	0	0.18806	0.86
ONG1201780	0	0	0	0	0	0	0	0	0	0	0	0	0	0	0	0.155224	0.86
ONG1201810	0	0	0	0	0	0	0	0	0	0	0	0	0	0	0	0	0.18
ONG1201820	0	0	0	0	0	0	0	0	0	0	0	0	0	0	0	0.00298507	0.87
ONGUN00070	0.00338983	0	0	0	0.00510204	0	0	0	0	0.0110497	0	0	0	0	0	0.2	0.28
