# Supplementary material for: Continuous infiltration and evolutionary trajectory of nuclear organelle DNA inOryza
Source: HighWire-hosted journal article supplement (doi:10.1101/gr.279609.124), 2025-04-25
Supplement: Supplemental_Table_S6.xlsx [file Supplemental_Table_S6.xlsx]

## Sheet: Supplementary Table 6
Supplemental Table 6. The near-intact organellar genes (NIOGs) in the nuclear genomes.
Accession	ONG ID	ONG location	Organellar gene location	Organellar gene locus tag	Gene name	RNA editing	coding or non-coding	coding avalibility
IRGSP1.0	ONG0800690	Chr8:22322551-22327776	Chr8:22324587-22325649	OrsajCp002	psbA	NA	coding	possible functionality
IRGSP1.0	ONG0400170	Chr4:9089919-9210431	Chr4:9136177-9137239	OrsajCp002	psbA	NA	coding	possible functionality
IRGSP1.0	ONG1000180	Chr10:10790062-10920944	Chr10:10807275-10808337	OrsajCp002	psbA	NA	coding	possible functionality
IRGSP1.0	ONG1000500	Chr10:21334663-21337365	Chr10:21334663-21335702	OrsajCp002	psbA	NA	coding	truncated
IRGSP1.0	ONG1200350	Chr12:11409052-11414526	Chr12:11411967-11413029	OrsajCp002	psbA	NA	coding	truncated
IRGSP1.0	ONG0400170	Chr4:9089919-9210431	Chr4:9106475-9109051	OrsajCt121	trnK	NA	non-coding	non-coding
IRGSP1.0	ONG1000180	Chr10:10790062-10920944	Chr10:10808556-10811132	OrsajCt121	trnK	NA	non-coding	non-coding
IRGSP1.0	ONG1200350	Chr12:11409052-11414526	Chr12:11409173-11411748	OrsajCt121	trnK	NA	non-coding	non-coding
IRGSP1.0	ONG0400170	Chr4:9089919-9210431	Chr4:9107210-9108746	OrsajCp003	matK	NA	coding	possible functionality
IRGSP1.0	ONG1000180	Chr10:10790062-10920944	Chr10:10808861-10810397	OrsajCp003	matK	NA	coding	possible functionality
IRGSP1.0	ONG0800690	Chr8:22322551-22327776	Chr8:22322551-22324063	OrsajCp003	matK	NA	coding	truncated
IRGSP1.0	ONG1200350	Chr12:11409052-11414526	Chr12:11409906-11411443	OrsajCp003	matK	NA	coding	truncated
IRGSP1.0	ONG1000180	Chr10:10790062-10920944	Chr10:10811680-10812748	OrsajCp004	RPS16	NA	coding	truncated
IRGSP1.0	ONG1000180	Chr10:10790062-10920944	Chr10:10813808-10813881	OrsajCt122	trnQ	NA	non-coding	non-coding
IRGSP1.0	ONG1000540	Chr10:22657201-22657479	Chr10:22657287-22657360	OrsajCt122	trnQ	NA	non-coding	non-coding
IRGSP1.0	ONG0700360	Chr7:15562158-15562554	Chr7:15562362-15562435	OrsajCt122	trnQ	NA	non-coding	non-coding
IRGSP1.0	ONG0400170	Chr4:9089919-9210431	Chr4:9174137-9174210	OrsajCt122	trnQ	NA	non-coding	non-coding
IRGSP1.0	ONG0100140	Chr1:5005574-5006637	Chr1:5005653-5005726	OrsajCt122	trnQ	NA	non-coding	non-coding
IRGSP1.0	ONG0200320	Chr2:14239661-14289647	Chr2:14289318-14289504	OrsajCp005	psbK	NA	coding	possible functionality
IRGSP1.0	ONG1100630	Chr11:22518805-22519200	Chr11:22518900-22519086	OrsajCp005	psbK	NA	coding	possible functionality
IRGSP1.0	ONG0400170	Chr4:9089919-9210431	Chr4:9174555-9174741	OrsajCp005	psbK	NA	coding	possible functionality
IRGSP1.0	ONG1000530	Chr10:22444952-22449265	Chr10:22448899-22449085	OrsajCp005	psbK	NA	coding	possible functionality
IRGSP1.0	ONG1000180	Chr10:10790062-10920944	Chr10:10814226-10814412	OrsajCp005	psbK	NA	coding	possible functionality
IRGSP1.0	ONG1000530	Chr10:22444952-22449265	Chr10:22448400-22448511	OrsajCp006	psbI	NA	coding	possible functionality
IRGSP1.0	ONG1000180	Chr10:10790062-10920944	Chr10:10814800-10814911	OrsajCp006	psbI	NA	coding	possible functionality
IRGSP1.0	ONG0400170	Chr4:9089919-9210431	Chr4:9175130-9175241	OrsajCp006	psbI	NA	coding	possible functionality
IRGSP1.0	ONG0200320	Chr2:14239661-14289647	Chr2:14288818-14288929	OrsajCp006	psbI	NA	coding	possible functionality
IRGSP1.0	ONG0600050	Chr6:4005981-4006643	Chr6:4006043-4006154	OrsajCp006	psbI	NA	coding	possible functionality
IRGSP1.0	ONG1000180	Chr10:10790062-10920944	Chr10:10815021-10815109	OrsajCt123	trnS	NA	non-coding	non-coding
IRGSP1.0	ONG1000530	Chr10:22444952-22449265	Chr10:22448202-22448290	OrsajCt123	trnS	NA	non-coding	non-coding
IRGSP1.0	ONG0400170	Chr4:9089919-9210431	Chr4:9175351-9175439	OrsajCt123	trnS	NA	non-coding	non-coding
IRGSP1.0	ONG0200320	Chr2:14239661-14289647	Chr2:14288620-14288708	OrsajCt123	trnS	NA	non-coding	non-coding
IRGSP1.0	ONG0200750	Chr2:29074069-29074320	Chr2:29074169-29074257	OrsajCt123	trnS	NA	non-coding	non-coding
IRGSP1.0	ONG0200820	Chr2:32694334-32694487	Chr2:32694395-32694483	OrsajCt123	trnS	NA	non-coding	non-coding
IRGSP1.0	ONG1100690	Chr11:23672236-23672490	Chr11:23672255-23672344	OrsajCt123	trnS	NA	non-coding	non-coding
IRGSP1.0	ONG1000530	Chr10:22444952-22449265	Chr10:22447468-22447771	OrsajCp007	ORF100	NA	coding	possible functionality
IRGSP1.0	ONG0200320	Chr2:14239661-14289647	Chr2:14287885-14288188	OrsajCp007	ORF100	NA	coding	possible functionality
IRGSP1.0	ONG0100890	Chr1:33497812-33589786	Chr1:33567102-33567405	OrsajCp007	ORF100	NA	coding	possible functionality
IRGSP1.0	ONG0100890	Chr1:33497812-33589786	Chr1:33567654-33568716	OrsajCp008	psbD	NA	coding	possible functionality
IRGSP1.0	ONG0400170	Chr4:9089919-9210431	Chr4:9176354-9177417	OrsajCp008	psbD	NA	coding	truncated
IRGSP1.0	ONG0200320	Chr2:14239661-14289647	Chr2:14286574-14287636	OrsajCp008	psbD	NA	coding	possible functionality
IRGSP1.0	ONG1000180	Chr10:10790062-10920944	Chr10:10816024-10817085	OrsajCp008	psbD	NA	coding	truncated
IRGSP1.0	ONG1000530	Chr10:22444952-22449265	Chr10:22446157-22447219	OrsajCp008	psbD	NA	coding	possible functionality
IRGSP1.0	ONG0400170	Chr4:9089919-9210431	Chr4:9177363-9178786	OrsajCp009	psbC	NA	coding	truncated
IRGSP1.0	ONG0200320	Chr2:14239661-14289647	Chr2:14285205-14286627	OrsajCp009	psbC	NA	coding	possible functionality
IRGSP1.0	ONG0100890	Chr1:33497812-33589786	Chr1:33568663-33570089	OrsajCp009	psbC	NA	coding	truncated
IRGSP1.0	ONG1000180	Chr10:10790062-10920944	Chr10:10817032-10818454	OrsajCp009	psbC	NA	coding	possible functionality
IRGSP1.0	ONG0500620	Chr5:12954916-12985817	Chr5:12976938-12978360	OrsajCp009	psbC	NA	coding	possible functionality
IRGSP1.0	ONG1000180	Chr10:10790062-10920944	Chr10:10818626-10818714	OrsajCt124	trnS	NA	non-coding	non-coding
IRGSP1.0	ONG0500620	Chr5:12954916-12985817	Chr5:12978533-12978621	OrsajCt124	trnS	NA	non-coding	non-coding
IRGSP1.0	ONG0400170	Chr4:9089919-9210431	Chr4:9178958-9179046	OrsajCt124	trnS	NA	non-coding	non-coding
IRGSP1.0	ONG0300920	Chr3:34489011-34489968	Chr3:34489166-34489254	OrsajCt124	trnS	NA	non-coding	non-coding
IRGSP1.0	ONG0200320	Chr2:14239661-14289647	Chr2:14284944-14285032	OrsajCt124	trnS	NA	non-coding	non-coding
IRGSP1.0	ONG0100890	Chr1:33497812-33589786	Chr1:33570261-33570349	OrsajCt124	trnS	NA	non-coding	non-coding
IRGSP1.0	ONG1200750	Chr12:13342090-13419800	Chr12:13411492-13411580	OrsajCt124	trnS	NA	non-coding	non-coding
IRGSP1.0	ONG1200770	Chr12:13342090-13419800	Chr12:13411492-13411580	OrsajCt124	trnS	NA	non-coding	non-coding
IRGSP1.0	ONG0400170	Chr4:9089919-9210431	Chr4:9179397-9179586	OrsajCp010	psbZ	NA	coding	possible functionality
IRGSP1.0	ONG0300920	Chr3:34489011-34489968	Chr3:34489600-34489789	OrsajCp010	psbZ	NA	coding	possible functionality
IRGSP1.0	ONG0200320	Chr2:14239661-14289647	Chr2:14284409-14284598	OrsajCp010	psbZ	NA	coding	possible functionality
IRGSP1.0	ONG0100890	Chr1:33497812-33589786	Chr1:33570695-33570884	OrsajCp010	psbZ	NA	coding	possible functionality
IRGSP1.0	ONG1000180	Chr10:10790062-10920944	Chr10:10819060-10819249	OrsajCp010	psbZ	NA	coding	possible functionality
IRGSP1.0	ONG1200530	Chr12:19290459-19292914	Chr12:19292622-19292811	OrsajCp010	psbZ	NA	coding	possible functionality
IRGSP1.0	ONG1000180	Chr10:10790062-10920944	Chr10:10819454-10819525	OrsajCt125	trnG	NA	non-coding	non-coding
IRGSP1.0	ONG0400170	Chr4:9089919-9210431	Chr4:9179791-9179862	OrsajCt125	trnG	NA	non-coding	non-coding
IRGSP1.0	ONG0100890	Chr1:33497812-33589786	Chr1:33571089-33571160	OrsajCt125	trnG	NA	non-coding	non-coding
IRGSP1.0	ONG1200530	Chr12:19290459-19292914	Chr12:19292418-19292489	OrsajCt125	trnG	NA	non-coding	non-coding
IRGSP1.0	ONG0200320	Chr2:14239661-14289647	Chr2:14284133-14284204	OrsajCt125	trnG	NA	non-coding	non-coding
IRGSP1.0	ONG1000180	Chr10:10790062-10920944	Chr10:10819651-10819725	OrsajCt126	trnG	NA	non-coding	non-coding
IRGSP1.0	ONG0400170	Chr4:9089919-9210431	Chr4:9179988-9180062	OrsajCt126	trnG	NA	non-coding	non-coding
IRGSP1.0	ONG0200320	Chr2:14239661-14289647	Chr2:14283933-14284007	OrsajCt126	trnG	NA	non-coding	non-coding
IRGSP1.0	ONG0100220	Chr1:7761727-7764448	Chr1:7761743-7761817	OrsajCt126	trnG	NA	non-coding	non-coding
IRGSP1.0	ONG0100890	Chr1:33497812-33589786	Chr1:33571286-33571360	OrsajCt126	trnG	NA	non-coding	non-coding
IRGSP1.0	ONG1000180	Chr10:10790062-10920944	Chr10:10819958-10820032	OrsajCt127	trnfM	NA	non-coding	non-coding
IRGSP1.0	ONG0400170	Chr4:9089919-9210431	Chr4:9180295-9180369	OrsajCt127	trnfM	NA	non-coding	non-coding
IRGSP1.0	ONG0200320	Chr2:14239661-14289647	Chr2:14283622-14283696	OrsajCt127	trnfM	NA	non-coding	non-coding
IRGSP1.0	ONG0100220	Chr1:7761727-7764448	Chr1:7762054-7762128	OrsajCt127	trnfM	NA	non-coding	non-coding
IRGSP1.0	ONG0100890	Chr1:33497812-33589786	Chr1:33571593-33571667	OrsajCt127	trnfM	NA	non-coding	non-coding
IRGSP1.0	ONG1200530	Chr12:19290459-19292914	Chr12:19291904-19291980	OrsajCt127	trnfM	NA	non-coding	non-coding
IRGSP1.0	ONG1000180	Chr10:10790062-10920944	Chr10:10821196-10821466	OrsajCp011	ORF91	NA	coding	possible functionality
IRGSP1.0	ONG0400170	Chr4:9089919-9210431	Chr4:9181533-9181803	OrsajCp011	ORF91	NA	coding	possible functionality
IRGSP1.0	ONG0200320	Chr2:14239661-14289647	Chr2:14282188-14282458	OrsajCp011	ORF91	NA	coding	possible functionality
IRGSP1.0	ONG0100220	Chr1:7761727-7764448	Chr1:7763293-7763563	OrsajCp011	ORF91	NA	coding	possible functionality
IRGSP1.0	ONG0100890	Chr1:33497812-33589786	Chr1:33510401-33510671	OrsajCp011	ORF91	NA	coding	possible functionality
IRGSP1.0	ONG0100890	Chr1:33497812-33589786	Chr1:33572830-33573100	OrsajCp011	ORF91	NA	coding	possible functionality
IRGSP1.0	ONG1000180	Chr10:10790062-10920944	Chr10:10821307-10821383	OrsajCt129	trnI	NA	non-coding	non-coding
IRGSP1.0	ONG0400170	Chr4:9089919-9210431	Chr4:9181644-9181720	OrsajCt129	trnI	NA	non-coding	non-coding
IRGSP1.0	ONG0200320	Chr2:14239661-14289647	Chr2:14282271-14282347	OrsajCt129	trnI	NA	non-coding	non-coding
IRGSP1.0	ONG0100220	Chr1:7761727-7764448	Chr1:7763404-7763480	OrsajCt129	trnI	NA	non-coding	non-coding
IRGSP1.0	ONG0100890	Chr1:33497812-33589786	Chr1:33510484-33510560	OrsajCt129	trnI	NA	non-coding	non-coding
IRGSP1.0	ONG0100890	Chr1:33497812-33589786	Chr1:33572941-33573017	OrsajCt129	trnI	NA	non-coding	non-coding
IRGSP1.0	ONG1000180	Chr10:10790062-10920944	Chr10:10821690-10821903	OrsajCp012	ORF70	NA	coding	possible functionality
IRGSP1.0	ONG0400170	Chr4:9089919-9210431	Chr4:9182027-9182240	OrsajCp012	ORF70	NA	coding	possible functionality
IRGSP1.0	ONG0200320	Chr2:14239661-14289647	Chr2:14281751-14281964	OrsajCp012	ORF70	NA	coding	possible functionality
IRGSP1.0	ONG0200870	Chr2:35185080-35185629	Chr2:35185198-35185404	OrsajCp012	ORF70	NA	coding	truncated
IRGSP1.0	ONG0100220	Chr1:7761727-7764448	Chr1:7763787-7764000	OrsajCp012	ORF70	NA	coding	possible functionality
IRGSP1.0	ONG0100890	Chr1:33497812-33589786	Chr1:33509964-33510177	OrsajCp012	ORF70	NA	coding	possible functionality
IRGSP1.0	ONG1000180	Chr10:10790062-10920944	Chr10:10822178-10822250	OrsajCt130	trnT	NA	non-coding	non-coding
IRGSP1.0	ONG0400170	Chr4:9089919-9210431	Chr4:9182515-9182587	OrsajCt130	trnT	NA	non-coding	non-coding
IRGSP1.0	ONG0400220	Chr4:11051079-11052269	Chr4:11052103-11052175	OrsajCt130	trnT	NA	non-coding	non-coding
IRGSP1.0	ONG0200320	Chr2:14239661-14289647	Chr2:14281404-14281476	OrsajCt130	trnT	NA	non-coding	non-coding
IRGSP1.0	ONG0100220	Chr1:7761727-7764448	Chr1:7764275-7764347	OrsajCt130	trnT	NA	non-coding	non-coding
IRGSP1.0	ONG0100890	Chr1:33497812-33589786	Chr1:33509617-33509689	OrsajCt130	trnT	NA	non-coding	non-coding
IRGSP1.0	ONG0400170	Chr4:9089919-9210431	Chr4:9182583-9182656	OrsajCt131	trnT	NA	non-coding	non-coding
IRGSP1.0	ONG0400220	Chr4:11051079-11052269	Chr4:11052034-11052107	OrsajCt131	trnT	NA	non-coding	non-coding
IRGSP1.0	ONG0200320	Chr2:14239661-14289647	Chr2:14281335-14281408	OrsajCt131	trnT	NA	non-coding	non-coding
IRGSP1.0	ONG0100220	Chr1:7761727-7764448	Chr1:7764343-7764416	OrsajCt131	trnT	NA	non-coding	non-coding
IRGSP1.0	ONG0100890	Chr1:33497812-33589786	Chr1:33509548-33509621	OrsajCt131	trnT	NA	non-coding	non-coding
IRGSP1.0	ONG1000180	Chr10:10790062-10920944	Chr10:10822246-10822319	OrsajCt131	trnT	NA	non-coding	non-coding
IRGSP1.0	ONG1000180	Chr10:10790062-10920944	Chr10:10822767-10822840	OrsajCt132	trnE	NA	non-coding	non-coding
IRGSP1.0	ONG0400170	Chr4:9089919-9210431	Chr4:9183105-9183178	OrsajCt132	trnE	NA	non-coding	non-coding
IRGSP1.0	ONG0200320	Chr2:14239661-14289647	Chr2:14280813-14280886	OrsajCt132	trnE	NA	non-coding	non-coding
IRGSP1.0	ONG0200020	Chr2:1025234-1025482	Chr2:1025238-1025309	OrsajCt132	trnE	NA	non-coding	non-coding
IRGSP1.0	ONG0100890	Chr1:33497812-33589786	Chr1:33505878-33505951	OrsajCt132	trnE	NA	non-coding	non-coding
IRGSP1.0	ONG1000180	Chr10:10790062-10920944	Chr10:10822901-10822985	OrsajCt133	trnY	NA	non-coding	non-coding
IRGSP1.0	ONG0100890	Chr1:33497812-33589786	Chr1:33505733-33505817	OrsajCt133	trnY	NA	non-coding	non-coding
IRGSP1.0	ONG0400170	Chr4:9089919-9210431	Chr4:9183239-9183323	OrsajCt133	trnY	NA	non-coding	non-coding
IRGSP1.0	ONG0200320	Chr2:14239661-14289647	Chr2:14280668-14280752	OrsajCt133	trnY	NA	non-coding	non-coding
IRGSP1.0	ONG0200020	Chr2:1025234-1025482	Chr2:1025371-1025451	OrsajCt133	trnY	NA	non-coding	non-coding
IRGSP1.0	ONG1200510	Chr12:18612641-18613010	Chr12:18612920-18613002	OrsajCt133	trnY	NA	non-coding	non-coding
IRGSP1.0	ONG0400170	Chr4:9089919-9210431	Chr4:9183690-9183764	OrsajCt134	trnD	NA	non-coding	non-coding
IRGSP1.0	ONG0200320	Chr2:14239661-14289647	Chr2:14280231-14280305	OrsajCt134	trnD	NA	non-coding	non-coding
IRGSP1.0	ONG1100400	Chr11:14548712-14553893	Chr11:14548858-14548932	OrsajCt134	trnD	NA	non-coding	non-coding
IRGSP1.0	ONG1000180	Chr10:10790062-10920944	Chr10:10823352-10823426	OrsajCt134	trnD	NA	non-coding	non-coding
IRGSP1.0	ONG0700360	Chr7:15562158-15562554	Chr7:15562473-15562547	OrsajCt134	trnD	NA	non-coding	non-coding
IRGSP1.0	ONG0100890	Chr1:33497812-33589786	Chr1:33505299-33505370	OrsajCt134	trnD	NA	non-coding	non-coding
IRGSP1.0	ONG1000180	Chr10:10790062-10920944	Chr10:10823806-10823911	OrsajCp013	psbM	NA	coding	possible functionality
IRGSP1.0	ONG0400170	Chr4:9089919-9210431	Chr4:9184144-9184249	OrsajCp013	psbM	NA	coding	possible functionality
IRGSP1.0	ONG0200320	Chr2:14239661-14289647	Chr2:14279746-14279851	OrsajCp013	psbM	NA	coding	possible functionality
IRGSP1.0	ONG1000180	Chr10:10790062-10920944	Chr10:10824673-10824763	OrsajCp014	petN	NA	coding	possible functionality
IRGSP1.0	ONG0400170	Chr4:9089919-9210431	Chr4:9185004-9185094	OrsajCp014	petN	NA	coding	possible functionality
IRGSP1.0	ONG0200320	Chr2:14239661-14289647	Chr2:14278913-14279003	OrsajCp014	petN	NA	coding	possible functionality
IRGSP1.0	ONG1000180	Chr10:10790062-10920944	Chr10:10825208-10825279	OrsajCt135	trnC	NA	non-coding	non-coding
IRGSP1.0	ONG1000330	Chr10:16281818-16282333	Chr10:16282013-16282084	OrsajCt135	trnC	NA	non-coding	non-coding
IRGSP1.0	ONG0400170	Chr4:9089919-9210431	Chr4:9185539-9185610	OrsajCt135	trnC	NA	non-coding	non-coding
IRGSP1.0	ONG0200320	Chr2:14239661-14289647	Chr2:14278429-14278500	OrsajCt135	trnC	NA	non-coding	non-coding
IRGSP1.0	ONG0400170	Chr4:9089919-9210431	Chr4:9186693-9189921	OrsajCp015	rpoB	NA	coding	possible functionality
IRGSP1.0	ONG0200320	Chr2:14239661-14289647	Chr2:14274118-14277346	OrsajCp015	rpoB	NA	coding	truncated
IRGSP1.0	ONG0200320	Chr2:14239661-14289647	Chr2:14272032-14274081	OrsajCp016	rpoC1	NA	coding	possible functionality
IRGSP1.0	ONG1000180	Chr10:10790062-10920944	Chr10:10829593-10831642	OrsajCp016	rpoC1	NA	coding	truncated
IRGSP1.0	ONG0100890	Chr1:33497812-33589786	Chr1:33513182-33515231	OrsajCp016	rpoC1	NA	coding	possible functionality
IRGSP1.0	ONG0400170	Chr4:9089919-9210431	Chr4:9189958-9192007	OrsajCp016	rpoC1	NA	coding	possible functionality
IRGSP1.0	ONG0400170	Chr4:9089919-9210431	Chr4:9192206-9196748	OrsajCp017	rpoC2	NA	coding	possible functionality
IRGSP1.0	ONG1000180	Chr10:10790062-10920944	Chr10:10831841-10836382	OrsajCp017	rpoC2	NA	coding	truncated
IRGSP1.0	ONG1000480	Chr10:20451714-20484688	Chr10:20483522-20484233	OrsajCp018	RPS2	NA	coding	possible functionality
IRGSP1.0	ONG1000180	Chr10:10790062-10920944	Chr10:10836653-10837364	OrsajCp018	RPS2	NA	coding	possible functionality
IRGSP1.0	ONG0400170	Chr4:9089919-9210431	Chr4:9197019-9197730	OrsajCp018	RPS2	NA	coding	possible functionality
IRGSP1.0	ONG0200320	Chr2:14239661-14289647	Chr2:14270095-14270806	OrsajCp018	RPS2	NA	coding	possible functionality
IRGSP1.0	ONG0100890	Chr1:33497812-33589786	Chr1:33554788-33555499	OrsajCp018	RPS2	NA	coding	possible functionality
IRGSP1.0	ONG1000480	Chr10:20451714-20484688	Chr10:20482528-20483272	OrsajCp019	atpI	NA	coding	possible functionality
IRGSP1.0	ONG1000180	Chr10:10790062-10920944	Chr10:10837614-10838358	OrsajCp019	atpI	NA	coding	possible functionality
IRGSP1.0	ONG1000480	Chr10:20451714-20484688	Chr10:20481488-20481734	OrsajCp020	atpH	NA	coding	possible functionality
IRGSP1.0	ONG1000480	Chr10:20451714-20484688	Chr10:20479663-20481033	OrsajCp021	atpF	NA	coding	truncated
IRGSP1.0	ONG1000180	Chr10:10790062-10920944	Chr10:10839888-10841258	OrsajCp021	atpF	NA	coding	truncated
IRGSP1.0	ONG0400170	Chr4:9089919-9210431	Chr4:9122131-9123501	OrsajCp021	atpF	NA	coding	truncated
IRGSP1.0	ONG0400170	Chr4:9089919-9210431	Chr4:9123601-9125125	OrsajCp022	atpA	NA	coding	possible functionality
IRGSP1.0	ONG1000480	Chr10:20451714-20484688	Chr10:20478039-20479563	OrsajCp022	atpA	NA	coding	truncated
IRGSP1.0	ONG1000180	Chr10:10790062-10920944	Chr10:10841358-10842882	OrsajCp022	atpA	NA	coding	possible functionality
IRGSP1.0	ONG1000480	Chr10:20451714-20484688	Chr10:20477835-20477907	OrsajCt136	trnR	NA	non-coding	non-coding
IRGSP1.0	ONG1000180	Chr10:10790062-10920944	Chr10:10843014-10843084	OrsajCt136	trnR	NA	non-coding	non-coding
IRGSP1.0	ONG0900550	Chr9:4673689-4732633	Chr9:4691982-4692054	OrsajCt136	trnR	NA	non-coding	non-coding
IRGSP1.0	ONG0400170	Chr4:9089919-9210431	Chr4:9125257-9125329	OrsajCt136	trnR	NA	non-coding	non-coding
IRGSP1.0	ONG0300660	Chr3:27609595-27613171	Chr3:27612892-27612965	OrsajCt136	trnR	NA	non-coding	non-coding
IRGSP1.0	ONG1000180	Chr10:10790062-10920944	Chr10:10843457-10843769	OrsajCp023	RPS14	NA	coding	possible functionality
IRGSP1.0	ONG1000480	Chr10:20451714-20484688	Chr10:20477152-20477464	OrsajCp023	RPS14	NA	coding	possible functionality
IRGSP1.0	ONG0400170	Chr4:9089919-9210431	Chr4:9125700-9126012	OrsajCp023	RPS14	NA	coding	possible functionality
IRGSP1.0	ONG1000480	Chr10:20451714-20484688	Chr10:20474800-20477005	OrsajCp024	psaB	NA	coding	possible functionality
IRGSP1.0	ONG1000180	Chr10:10790062-10920944	Chr10:10843916-10846121	OrsajCp024	psaB	NA	coding	possible functionality
IRGSP1.0	ONG0100890	Chr1:33497812-33589786	Chr1:33522542-33524747	OrsajCp024	psaB	NA	coding	possible functionality
IRGSP1.0	ONG0400170	Chr4:9089919-9210431	Chr4:9126159-9128365	OrsajCp024	psaB	NA	coding	truncated
IRGSP1.0	ONG0500010	Chr5:405042-408731	Chr5:406166-408419	OrsajCp025	psaA	NA	coding	possible functionality
IRGSP1.0	ONG0400170	Chr4:9089919-9210431	Chr4:9128390-9130643	OrsajCp025	psaA	NA	coding	possible functionality
IRGSP1.0	ONG0100890	Chr1:33497812-33589786	Chr1:33524772-33527025	OrsajCp025	psaA	NA	coding	possible functionality
IRGSP1.0	ONG1000480	Chr10:20451714-20484688	Chr10:20472522-20474775	OrsajCp025	psaA	NA	coding	possible functionality
IRGSP1.0	ONG1000180	Chr10:10790062-10920944	Chr10:10846146-10848399	OrsajCp025	psaA	NA	coding	possible functionality
IRGSP1.0	ONG1000180	Chr10:10790062-10920944	Chr10:10848999-10850978	OrsajCp026	YCF3	NA	coding	truncated
IRGSP1.0	ONG1000480	Chr10:20451714-20484688	Chr10:20469944-20471922	OrsajCp026	YCF3	NA	coding	truncated
IRGSP1.0	ONG0400170	Chr4:9089919-9210431	Chr4:9110740-9112719	OrsajCp026	YCF3	NA	coding	truncated
IRGSP1.0	ONG0400170	Chr4:9089919-9210431	Chr4:9131243-9133216	OrsajCp026	YCF3	NA	coding	truncated
IRGSP1.0	ONG0100890	Chr1:33497812-33589786	Chr1:33527625-33529604	OrsajCp026	YCF3	NA	coding	truncated
IRGSP1.0	ONG1000180	Chr10:10790062-10920944	Chr10:10851576-10851663	OrsajCt137	trnS	NA	non-coding	non-coding
IRGSP1.0	ONG1000480	Chr10:20451714-20484688	Chr10:20469259-20469346	OrsajCt137	trnS	NA	non-coding	non-coding
IRGSP1.0	ONG0400170	Chr4:9089919-9210431	Chr4:9113317-9113404	OrsajCt137	trnS	NA	non-coding	non-coding
IRGSP1.0	ONG0400170	Chr4:9089919-9210431	Chr4:9133813-9133900	OrsajCt137	trnS	NA	non-coding	non-coding
IRGSP1.0	ONG1000480	Chr10:20451714-20484688	Chr10:20468368-20468974	OrsajCp027	RPS4	NA	coding	possible functionality
IRGSP1.0	ONG0400170	Chr4:9089919-9210431	Chr4:9113689-9114295	OrsajCp027	RPS4	NA	coding	possible functionality
IRGSP1.0	ONG0400170	Chr4:9089919-9210431	Chr4:9134186-9134792	OrsajCp027	RPS4	NA	coding	possible functionality
IRGSP1.0	ONG0100890	Chr1:33497812-33589786	Chr1:33516311-33516913	OrsajCp027	RPS4	NA	coding	truncated
IRGSP1.0	ONG1200630	Chr12:22493545-22494903	Chr12:22493764-22493837	OrsajCt138	trnT	NA	non-coding	non-coding
IRGSP1.0	ONG1200630	Chr12:22493545-22494903	Chr12:22494772-22494845	OrsajCt138	trnT	NA	non-coding	non-coding
IRGSP1.0	ONG1200340	Chr12:11282791-11289656	Chr12:11282859-11282932	OrsajCt138	trnT	NA	non-coding	non-coding
IRGSP1.0	ONG1200630	Chr12:22493545-22494903	Chr12:22494268-22494341	OrsajCt138	trnT	NA	non-coding	non-coding
IRGSP1.0	ONG1000180	Chr10:10790062-10920944	Chr10:10852816-10852889	OrsajCt138	trnT	NA	non-coding	non-coding
IRGSP1.0	ONG1000480	Chr10:20451714-20484688	Chr10:20467996-20468069	OrsajCt138	trnT	NA	non-coding	non-coding
IRGSP1.0	ONG0400170	Chr4:9089919-9210431	Chr4:9114594-9114667	OrsajCt138	trnT	NA	non-coding	non-coding
IRGSP1.0	ONG0400170	Chr4:9089919-9210431	Chr4:9135091-9135164	OrsajCt138	trnT	NA	non-coding	non-coding
IRGSP1.0	ONG0100890	Chr1:33497812-33589786	Chr1:33563581-33563654	OrsajCt138	trnT	NA	non-coding	non-coding
IRGSP1.0	ONG1000180	Chr10:10790062-10920944	Chr10:10853652-10854278	OrsajCt139	trnL	NA	non-coding	non-coding
IRGSP1.0	ONG1000480	Chr10:20451714-20484688	Chr10:20466600-20467226	OrsajCt139	trnL	NA	non-coding	non-coding
IRGSP1.0	ONG0100890	Chr1:33497812-33589786	Chr1:33562192-33562818	OrsajCt139	trnL	NA	non-coding	non-coding
IRGSP1.0	ONG0400170	Chr4:9089919-9210431	Chr4:9115430-9116056	OrsajCt139	trnL	NA	non-coding	non-coding
IRGSP1.0	ONG1200340	Chr12:11282791-11289656	Chr12:11283695-11284320	OrsajCt139	trnL	NA	non-coding	non-coding
IRGSP1.0	ONG1200340	Chr12:11282791-11289656	Chr12:11284564-11284637	OrsajCt140	trnF	NA	non-coding	non-coding
IRGSP1.0	ONG1200750	Chr12:13342090-13419800	Chr12:13350384-13350457	OrsajCt140	trnF	NA	non-coding	non-coding
IRGSP1.0	ONG1200770	Chr12:13342090-13419800	Chr12:13350384-13350457	OrsajCt140	trnF	NA	non-coding	non-coding
IRGSP1.0	ONG1000180	Chr10:10790062-10920944	Chr10:10854522-10854595	OrsajCt140	trnF	NA	non-coding	non-coding
IRGSP1.0	ONG1000480	Chr10:20451714-20484688	Chr10:20466284-20466357	OrsajCt140	trnF	NA	non-coding	non-coding
IRGSP1.0	ONG0100890	Chr1:33497812-33589786	Chr1:33517623-33517696	OrsajCt140	trnF	NA	non-coding	non-coding
IRGSP1.0	ONG0100890	Chr1:33497812-33589786	Chr1:33561875-33561948	OrsajCt140	trnF	NA	non-coding	non-coding
IRGSP1.0	ONG1200340	Chr12:11282791-11289656	Chr12:11285131-11285611	OrsajCp028	ndhJ	NA	coding	possible functionality
IRGSP1.0	ONG1000480	Chr10:20451714-20484688	Chr10:20465310-20465790	OrsajCp028	ndhJ	NA	coding	possible functionality
IRGSP1.0	ONG1000180	Chr10:10790062-10920944	Chr10:10855089-10855569	OrsajCp028	ndhJ	NA	coding	possible functionality
IRGSP1.0	ONG0100890	Chr1:33497812-33589786	Chr1:33560901-33561381	OrsajCp028	ndhJ	NA	coding	possible functionality
IRGSP1.0	ONG0100890	Chr1:33497812-33589786	Chr1:33518256-33518740	OrsajCp028	ndhJ	NA	coding	truncated
IRGSP1.0	ONG1000480	Chr10:20451714-20484688	Chr10:20464535-20465213	OrsajCp029	ndhK	NA	coding	possible functionality
IRGSP1.0	ONG1000180	Chr10:10790062-10920944	Chr10:10855666-10856344	OrsajCp029	ndhK	NA	coding	possible functionality
IRGSP1.0	ONG0100890	Chr1:33497812-33589786	Chr1:33560126-33560804	OrsajCp029	ndhK	NA	coding	possible functionality
IRGSP1.0	ONG0100890	Chr1:33497812-33589786	Chr1:33518837-33519493	OrsajCp029	ndhK	NA	coding	truncated
IRGSP1.0	ONG1200340	Chr12:11282791-11289656	Chr12:11285708-11286386	OrsajCp029	ndhK	NA	coding	possible functionality
IRGSP1.0	ONG0600260	Chr6:12744715-12747935	Chr6:12746744-12747422	OrsajCp029	ndhK	NA	coding	possible functionality
IRGSP1.0	ONG1200340	Chr12:11282791-11289656	Chr12:11286435-11286798	OrsajCp030	ndhC	NA	coding	possible functionality
IRGSP1.0	ONG1200160	Chr12:5608911-5658338	Chr12:5609327-5609690	OrsajCp030	ndhC	NA	coding	truncated
IRGSP1.0	ONG1000480	Chr10:20451714-20484688	Chr10:20464120-20464483	OrsajCp030	ndhC	NA	coding	possible functionality
IRGSP1.0	ONG1000180	Chr10:10790062-10920944	Chr10:10856395-10856757	OrsajCp030	ndhC	NA	coding	truncated
IRGSP1.0	ONG0400180	Chr4:13994075-13996055	Chr4:13995550-13995915	OrsajCp030	ndhC	NA	coding	truncated
IRGSP1.0	ONG0400180	Chr4:9696643-9698620	Chr4:9696783-9697151	OrsajCp030	ndhC	NA	coding	truncated
IRGSP1.0	ONG0600260	Chr6:12744715-12747935	Chr6:12746325-12746695	OrsajCp030	ndhC	NA	coding	truncated
IRGSP1.0	ONG1200160	Chr12:5608911-5658338	Chr12:5611028-5611067	OrsajCt141	trnV	NA	non-coding	non-coding
IRGSP1.0	ONG1200760	Chr12:8526779-8561586	Chr12:8530446-8530485	OrsajCt141	trnV	NA	non-coding	non-coding
IRGSP1.0	ONG1200340	Chr12:11282791-11289656	Chr12:11288136-11288175	OrsajCt141	trnV	NA	non-coding	non-coding
IRGSP1.0	ONG1000180	Chr10:10790062-10920944	Chr10:10858095-10858134	OrsajCt141	trnV	NA	non-coding	non-coding
IRGSP1.0	ONG1000480	Chr10:20451714-20484688	Chr10:20462743-20462782	OrsajCt141	trnV	NA	non-coding	non-coding
IRGSP1.0	ONG0600260	Chr6:12744715-12747935	Chr6:12744948-12744987	OrsajCt141	trnV	NA	non-coding	non-coding
IRGSP1.0	ONG0602940	Chr6:23563358-23592835	Chr6:23591715-23591754	OrsajCt141	trnV	NA	non-coding	non-coding
IRGSP1.0	ONG0300820	Chr3:31809345-31821856	Chr3:31819292-31819331	OrsajCt141	trnV	NA	non-coding	non-coding
IRGSP1.0	ONG1200760	Chr12:8526779-8561586	Chr12:8530196-8530269	OrsajCt142	trnM	NA	non-coding	non-coding
IRGSP1.0	ONG1200340	Chr12:11282791-11289656	Chr12:11288356-11288429	OrsajCt142	trnM	NA	non-coding	non-coding
IRGSP1.0	ONG1200160	Chr12:5608911-5658338	Chr12:5611248-5611321	OrsajCt142	trnM	NA	non-coding	non-coding
IRGSP1.0	ONG1200740	Chr12:20452151-20705637	Chr12:20539781-20539853	OrsajCt142	trnM	NA	non-coding	non-coding
IRGSP1.0	ONG1000180	Chr10:10790062-10920944	Chr10:10858315-10858388	OrsajCt142	trnM	NA	non-coding	non-coding
IRGSP1.0	ONG0602940	Chr6:23563358-23592835	Chr6:23591461-23591534	OrsajCt142	trnM	NA	non-coding	non-coding
IRGSP1.0	ONG0600020	Chr6:1095046-1107974	Chr6:1095286-1095359	OrsajCt142	trnM	NA	non-coding	non-coding
IRGSP1.0	ONG0300820	Chr3:31809345-31821856	Chr3:31819512-31819585	OrsajCt142	trnM	NA	non-coding	non-coding
IRGSP1.0	ONG0100890	Chr1:33497812-33589786	Chr1:33539756-33539829	OrsajCt142	trnM	NA	non-coding	non-coding
IRGSP1.0	ONG1100300	Chr11:10857746-10859134	Chr11:10857947-10858020	OrsajCt142	trnM	NA	non-coding	non-coding
IRGSP1.0	ONG0600020	Chr6:1095046-1107974	Chr6:1095471-1095885	OrsajCp031	atpE	NA	coding	possible functionality
IRGSP1.0	ONG0602940	Chr6:23563358-23592835	Chr6:23590935-23591349	OrsajCp031	atpE	NA	coding	possible functionality
IRGSP1.0	ONG0300820	Chr3:31809345-31821856	Chr3:31819697-31820111	OrsajCp031	atpE	NA	coding	possible functionality
IRGSP1.0	ONG0100890	Chr1:33497812-33589786	Chr1:33539941-33540355	OrsajCp031	atpE	NA	coding	possible functionality
IRGSP1.0	ONG1200160	Chr12:5608911-5658338	Chr12:5611433-5611847	OrsajCp031	atpE	NA	coding	possible functionality
IRGSP1.0	ONG1200340	Chr12:11282791-11289656	Chr12:11288541-11288955	OrsajCp031	atpE	NA	coding	possible functionality
IRGSP1.0	ONG1200760	Chr12:8526779-8561586	Chr12:8529683-8530096	OrsajCp031	atpE	NA	coding	truncated
IRGSP1.0	ONG1000180	Chr10:10790062-10920944	Chr10:10858500-10858914	OrsajCp031	atpE	NA	coding	possible functionality
IRGSP1.0	ONG0800490	Chr8:16528473-16529138	Chr8:16528712-16529128	OrsajCp031	atpE	NA	coding	truncated
IRGSP1.0	ONG1000180	Chr10:10790062-10920944	Chr10:10858910-10860407	OrsajCp032	atpB	NA	coding	possible functionality
IRGSP1.0	ONG1200160	Chr12:5608911-5658338	Chr12:5611843-5613340	OrsajCp032	atpB	NA	coding	truncated
IRGSP1.0	ONG0602940	Chr6:23563358-23592835	Chr6:23589442-23590939	OrsajCp032	atpB	NA	coding	possible functionality
IRGSP1.0	ONG0100370	Chr1:14137452-14140345	Chr1:14137640-14139139	OrsajCp032	atpB	NA	coding	truncated
IRGSP1.0	ONG1000180	Chr10:10790062-10920944	Chr10:10861204-10862638	OrsajCp033	rbcL	NA	coding	possible functionality
IRGSP1.0	ONG0602940	Chr6:23563358-23592835	Chr6:23587211-23588644	OrsajCp033	rbcL	NA	coding	truncated
IRGSP1.0	ONG1200160	Chr12:5608911-5658338	Chr12:5614139-5615573	OrsajCp033	rbcL	NA	coding	possible functionality
IRGSP1.0	ONG1000180	Chr10:10790062-10920944	Chr10:10862915-10863044	OrsajCp034	ORF42	NA	coding	possible functionality
IRGSP1.0	ONG0602940	Chr6:23563358-23592835	Chr6:23586805-23586934	OrsajCp034	ORF42	NA	coding	possible functionality
IRGSP1.0	ONG1100560	Chr11:19358387-19403200	Chr11:19402819-19402949	OrsajCp034	ORF42	NA	coding	truncated
IRGSP1.0	ONG1000180	Chr10:10790062-10920944	Chr10:10863067-10863469	OrsajCp035	ORF133	NA	coding	possible functionality
IRGSP1.0	ONG0602940	Chr6:23563358-23592835	Chr6:23586380-23586782	OrsajCp035	ORF133	NA	coding	possible functionality
IRGSP1.0	ONG0100890	Chr1:33497812-33589786	Chr1:33573230-33573632	OrsajCp035	ORF133	NA	coding	possible functionality
IRGSP1.0	ONG0602940	Chr6:23563358-23592835	Chr6:23585865-23586186	OrsajCp036	ORF106	NA	coding	possible functionality
IRGSP1.0	ONG1000180	Chr10:10790062-10920944	Chr10:10863663-10863984	OrsajCp036	ORF106	NA	coding	possible functionality
IRGSP1.0	ONG0100890	Chr1:33497812-33589786	Chr1:33573826-33574146	OrsajCp036	ORF106	NA	coding	truncated
IRGSP1.0	ONG1200320	Chr12:11087194-11090155	Chr12:11087848-11088169	OrsajCp036	ORF106	NA	coding	possible functionality
IRGSP1.0	ONG1200320	Chr12:11087194-11090155	Chr12:11087400-11087511	OrsajCp037	psaI	NA	coding	possible functionality
IRGSP1.0	ONG0100550	Chr1:20439958-20446238	Chr1:20440442-20440553	OrsajCp037	psaI	NA	coding	possible functionality
IRGSP1.0	ONG0100890	Chr1:33497812-33589786	Chr1:33574484-33574595	OrsajCp037	psaI	NA	coding	possible functionality
IRGSP1.0	ONG0602940	Chr6:23563358-23592835	Chr6:23585424-23585535	OrsajCp037	psaI	NA	coding	possible functionality
IRGSP1.0	ONG1000180	Chr10:10790062-10920944	Chr10:10864321-10864430	OrsajCp037	psaI	NA	coding	possible functionality
IRGSP1.0	ONG0400760	Chr4:27431247-27431520	Chr4:27431383-27431492	OrsajCp037	psaI	NA	coding	truncated
IRGSP1.0	ONG0100890	Chr1:33497812-33589786	Chr1:33578143-33578701	OrsajCp038	YCF4	NA	coding	possible functionality
IRGSP1.0	ONG0100550	Chr1:20439958-20446238	Chr1:20440921-20441479	OrsajCp038	YCF4	NA	coding	possible functionality
IRGSP1.0	ONG0200320	Chr2:14239661-14289647	Chr2:14264610-14265168	OrsajCp038	YCF4	NA	coding	possible functionality
IRGSP1.0	ONG0602940	Chr6:23563358-23592835	Chr6:23584497-23585055	OrsajCp038	YCF4	NA	coding	possible functionality
IRGSP1.0	ONG1000180	Chr10:10790062-10920944	Chr10:10864804-10865362	OrsajCp038	YCF4	NA	coding	truncated
IRGSP1.0	ONG1000180	Chr10:10790062-10920944	Chr10:10865392-10865651	OrsajCp039	ORF85	NA	coding	truncated
IRGSP1.0	ONG0200320	Chr2:14239661-14289647	Chr2:14264321-14264580	OrsajCp039	ORF85	NA	coding	truncated
IRGSP1.0	ONG0100890	Chr1:33497812-33589786	Chr1:33578731-33578990	OrsajCp039	ORF85	NA	coding	truncated
IRGSP1.0	ONG0100550	Chr1:20439958-20446238	Chr1:20441509-20441767	OrsajCp039	ORF85	NA	coding	truncated
IRGSP1.0	ONG1200160	Chr12:5608911-5658338	Chr12:5635600-5635859	OrsajCp039	ORF85	NA	coding	truncated
IRGSP1.0	ONG0602940	Chr6:23563358-23592835	Chr6:23584208-23584467	OrsajCp039	ORF85	NA	coding	truncated
IRGSP1.0	ONG0200320	Chr2:14239661-14289647	Chr2:14263498-14264191	OrsajCp040	cemA	NA	coding	possible functionality
IRGSP1.0	ONG1200160	Chr12:5608911-5658338	Chr12:5635994-5636684	OrsajCp040	cemA	NA	coding	truncated
IRGSP1.0	ONG1000180	Chr10:10790062-10920944	Chr10:10865781-10866475	OrsajCp040	cemA	NA	coding	truncated
IRGSP1.0	ONG0602940	Chr6:23563358-23592835	Chr6:23583383-23584078	OrsajCp040	cemA	NA	coding	truncated
IRGSP1.0	ONG0100550	Chr1:20439958-20446238	Chr1:20441905-20442596	OrsajCp040	cemA	NA	coding	truncated
IRGSP1.0	ONG0101010	Chr1:38269664-38273225	Chr1:38271600-38272563	OrsajCp041	petA	NA	coding	possible functionality
IRGSP1.0	ONG0100550	Chr1:20439958-20446238	Chr1:20442792-20443753	OrsajCp041	petA	NA	coding	truncated
IRGSP1.0	ONG1000180	Chr10:10790062-10920944	Chr10:10866704-10867667	OrsajCp041	petA	NA	coding	possible functionality
IRGSP1.0	ONG0800260	Chr8:9242935-9284593	Chr8:9282837-9283800	OrsajCp041	petA	NA	coding	possible functionality
IRGSP1.0	ONG0200320	Chr2:14239661-14289647	Chr2:14262306-14263269	OrsajCp041	petA	NA	coding	possible functionality
IRGSP1.0	ONG0602940	Chr6:23563358-23592835	Chr6:23582191-23583154	OrsajCp041	petA	NA	coding	possible functionality
IRGSP1.0	ONG1200160	Chr12:5608911-5658338	Chr12:5636913-5637876	OrsajCp041	petA	NA	coding	truncated
IRGSP1.0	ONG0900520	Chr9:21930219-21930820	Chr9:21930226-21930349	OrsajCp042	psbJ	NA	coding	possible functionality
IRGSP1.0	ONG0602940	Chr6:23563358-23592835	Chr6:23581063-23581186	OrsajCp042	psbJ	NA	coding	possible functionality
IRGSP1.0	ONG0200320	Chr2:14239661-14289647	Chr2:14261183-14261306	OrsajCp042	psbJ	NA	coding	possible functionality
IRGSP1.0	ONG0100890	Chr1:33497812-33589786	Chr1:33559110-33559233	OrsajCp042	psbJ	NA	coding	possible functionality
IRGSP1.0	ONG0101010	Chr1:38269664-38273225	Chr1:38270477-38270600	OrsajCp042	psbJ	NA	coding	possible functionality
IRGSP1.0	ONG0100550	Chr1:20439958-20446238	Chr1:20445820-20445943	OrsajCp042	psbJ	NA	coding	possible functionality
IRGSP1.0	ONG1200160	Chr12:5608911-5658338	Chr12:5638824-5638947	OrsajCp042	psbJ	NA	coding	possible functionality
IRGSP1.0	ONG1000180	Chr10:10790062-10920944	Chr10:10868672-10868795	OrsajCp042	psbJ	NA	coding	possible functionality
IRGSP1.0	ONG0800260	Chr8:9242935-9284593	Chr8:9281709-9281833	OrsajCp042	psbJ	NA	coding	truncated
IRGSP1.0	ONG1000180	Chr10:10790062-10920944	Chr10:10868921-10869038	OrsajCp043	psbL	NA	coding	possible functionality
IRGSP1.0	ONG0900520	Chr9:21930219-21930820	Chr9:21930475-21930592	OrsajCp043	psbL	NA	coding	possible functionality
IRGSP1.0	ONG0800260	Chr8:9242935-9284593	Chr8:9281466-9281583	OrsajCp043	psbL	NA	coding	possible functionality
IRGSP1.0	ONG0602940	Chr6:23563358-23592835	Chr6:23580820-23580937	OrsajCp043	psbL	NA	coding	possible functionality
IRGSP1.0	ONG0200320	Chr2:14239661-14289647	Chr2:14260940-14261057	OrsajCp043	psbL	NA	coding	possible functionality
IRGSP1.0	ONG0100550	Chr1:20439958-20446238	Chr1:20446069-20446186	OrsajCp043	psbL	NA	coding	possible functionality
IRGSP1.0	ONG0100890	Chr1:33497812-33589786	Chr1:33559359-33559476	OrsajCp043	psbL	NA	coding	possible functionality
IRGSP1.0	ONG0101010	Chr1:38269664-38273225	Chr1:38270234-38270351	OrsajCp043	psbL	NA	coding	possible functionality
IRGSP1.0	ONG0300580	Chr3:26268182-26268540	Chr3:26268249-26268366	OrsajCp043	psbL	NA	coding	possible functionality
IRGSP1.0	ONG1200160	Chr12:5608911-5658338	Chr12:5639073-5639190	OrsajCp043	psbL	NA	coding	possible functionality
IRGSP1.0	ONG1000180	Chr10:10790062-10920944	Chr10:10869060-10869180	OrsajCp044	psbF	NA	coding	possible functionality
IRGSP1.0	ONG0900520	Chr9:21930219-21930820	Chr9:21930614-21930734	OrsajCp044	psbF	NA	coding	possible functionality
IRGSP1.0	ONG0602940	Chr6:23563358-23592835	Chr6:23580678-23580798	OrsajCp044	psbF	NA	coding	possible functionality
IRGSP1.0	ONG0300560	Chr3:25801190-25801609	Chr3:25801479-25801599	OrsajCp044	psbF	NA	coding	possible functionality
IRGSP1.0	ONG0200320	Chr2:14239661-14289647	Chr2:14260798-14260918	OrsajCp044	psbF	NA	coding	possible functionality
IRGSP1.0	ONG0101010	Chr1:38269664-38273225	Chr1:38270092-38270212	OrsajCp044	psbF	NA	coding	possible functionality
IRGSP1.0	ONG0100890	Chr1:33497812-33589786	Chr1:33559498-33559618	OrsajCp044	psbF	NA	coding	possible functionality
IRGSP1.0	ONG1200160	Chr12:5608911-5658338	Chr12:5639212-5639332	OrsajCp044	psbF	NA	coding	possible functionality
IRGSP1.0	ONG0800260	Chr8:9242935-9284593	Chr8:9281324-9281444	OrsajCp044	psbF	NA	coding	possible functionality
IRGSP1.0	ONG0700550	Chr7:22398126-22400062	Chr7:22399813-22399933	OrsajCp044	psbF	NA	coding	possible functionality
IRGSP1.0	ONG1000180	Chr10:10790062-10920944	Chr10:10869190-10869442	OrsajCp045	psbE	NA	coding	possible functionality
IRGSP1.0	ONG0800260	Chr8:9242935-9284593	Chr8:9281062-9281314	OrsajCp045	psbE	NA	coding	possible functionality
IRGSP1.0	ONG0602940	Chr6:23563358-23592835	Chr6:23580416-23580668	OrsajCp045	psbE	NA	coding	possible functionality
IRGSP1.0	ONG0300560	Chr3:25801190-25801609	Chr3:25801217-25801469	OrsajCp045	psbE	NA	coding	possible functionality
IRGSP1.0	ONG0101010	Chr1:38269664-38273225	Chr1:38269830-38270082	OrsajCp045	psbE	NA	coding	possible functionality
IRGSP1.0	ONG1200160	Chr12:5608911-5658338	Chr12:5639342-5639594	OrsajCp045	psbE	NA	coding	possible functionality
IRGSP1.0	ONG0700550	Chr7:22398126-22400062	Chr7:22399552-22399803	OrsajCp045	psbE	NA	coding	truncated
IRGSP1.0	ONG1200160	Chr12:5608911-5658338	Chr12:5640790-5640886	OrsajCp046	petL	NA	coding	possible functionality
IRGSP1.0	ONG1200090	Chr12:4510049-4513057	Chr12:4510113-4510208	OrsajCp046	petL	NA	coding	truncated
IRGSP1.0	ONG1000180	Chr10:10790062-10920944	Chr10:10870638-10870734	OrsajCp046	petL	NA	coding	possible functionality
IRGSP1.0	ONG0800260	Chr8:9242935-9284593	Chr8:9279769-9279865	OrsajCp046	petL	NA	coding	possible functionality
IRGSP1.0	ONG0700550	Chr7:22398126-22400062	Chr7:22398260-22398356	OrsajCp046	petL	NA	coding	possible functionality
IRGSP1.0	ONG0602940	Chr6:23563358-23592835	Chr6:23579133-23579229	OrsajCp046	petL	NA	coding	possible functionality
IRGSP1.0	ONG0100530	Chr1:18995679-18997888	Chr1:18996973-18997065	OrsajCp046	petL	NA	coding	truncated
IRGSP1.0	ONG1000180	Chr10:10790062-10920944	Chr10:10870906-10871020	OrsajCp047	petG	NA	coding	possible functionality
IRGSP1.0	ONG0602940	Chr6:23563358-23592835	Chr6:23578846-23578960	OrsajCp047	petG	NA	coding	possible functionality
IRGSP1.0	ONG1200160	Chr12:5608911-5658338	Chr12:5641058-5641172	OrsajCp047	petG	NA	coding	possible functionality
IRGSP1.0	ONG0800260	Chr8:9242935-9284593	Chr8:9279483-9279597	OrsajCp047	petG	NA	coding	possible functionality
IRGSP1.0	ONG0100530	Chr1:18995679-18997888	Chr1:18997239-18997353	OrsajCp047	petG	NA	coding	possible functionality
IRGSP1.0	ONG1000180	Chr10:10790062-10920944	Chr10:10871136-10871210	OrsajCt143	trnW	NA	non-coding	non-coding
IRGSP1.0	ONG0800260	Chr8:9242935-9284593	Chr8:9279293-9279367	OrsajCt143	trnW	NA	non-coding	non-coding
IRGSP1.0	ONG0602940	Chr6:23563358-23592835	Chr6:23578656-23578730	OrsajCt143	trnW	NA	non-coding	non-coding
IRGSP1.0	ONG1200160	Chr12:5608911-5658338	Chr12:5641288-5641362	OrsajCt143	trnW	NA	non-coding	non-coding
IRGSP1.0	ONG0100530	Chr1:18995679-18997888	Chr1:18997469-18997543	OrsajCt143	trnW	NA	non-coding	non-coding
IRGSP1.0	ONG1200160	Chr12:5608911-5658338	Chr12:5641488-5641563	OrsajCt144	trnP	NA	non-coding	non-coding
IRGSP1.0	ONG1000180	Chr10:10790062-10920944	Chr10:10871336-10871411	OrsajCt144	trnP	NA	non-coding	non-coding
IRGSP1.0	ONG0800260	Chr8:9242935-9284593	Chr8:9279092-9279167	OrsajCt144	trnP	NA	non-coding	non-coding
IRGSP1.0	ONG0602940	Chr6:23563358-23592835	Chr6:23578455-23578530	OrsajCt144	trnP	NA	non-coding	non-coding
IRGSP1.0	ONG0100530	Chr1:18995679-18997888	Chr1:18997669-18997744	OrsajCt144	trnP	NA	non-coding	non-coding
IRGSP1.0	ONG1200160	Chr12:5608911-5658338	Chr12:5641881-5642016	OrsajCp048	ORF44	NA	coding	possible functionality
IRGSP1.0	ONG1000180	Chr10:10790062-10920944	Chr10:10871729-10871864	OrsajCp048	ORF44	NA	coding	possible functionality
IRGSP1.0	ONG0800260	Chr8:9242935-9284593	Chr8:9278639-9278774	OrsajCp048	ORF44	NA	coding	possible functionality
IRGSP1.0	ONG0602940	Chr6:23563358-23592835	Chr6:23578002-23578137	OrsajCp048	ORF44	NA	coding	possible functionality
IRGSP1.0	ONG1200160	Chr12:5608911-5658338	Chr12:5642458-5642659	OrsajCp049	RPL33	NA	coding	possible functionality
IRGSP1.0	ONG1000180	Chr10:10790062-10920944	Chr10:10872305-10872506	OrsajCp049	RPL33	NA	coding	possible functionality
IRGSP1.0	ONG0602940	Chr6:23563358-23592835	Chr6:23577360-23577561	OrsajCp049	RPL33	NA	coding	possible functionality
IRGSP1.0	ONG0800260	Chr8:9242935-9284593	Chr8:9277997-9278198	OrsajCp049	RPL33	NA	coding	possible functionality
IRGSP1.0	ONG1200160	Chr12:5608911-5658338	Chr12:5642900-5643392	OrsajCp050	RPS18	NA	coding	possible functionality
IRGSP1.0	ONG1000180	Chr10:10790062-10920944	Chr10:10872748-10873240	OrsajCp050	RPS18	NA	coding	possible functionality
IRGSP1.0	ONG0800260	Chr8:9242935-9284593	Chr8:9277265-9277757	OrsajCp050	RPS18	NA	coding	possible functionality
IRGSP1.0	ONG0602940	Chr6:23563358-23592835	Chr6:23576627-23577119	OrsajCp050	RPS18	NA	coding	possible functionality
IRGSP1.0	ONG1000180	Chr10:10790062-10920944	Chr10:10873462-10873822	OrsajCp051	RPL20	NA	coding	possible functionality
IRGSP1.0	ONG0800260	Chr8:9242935-9284593	Chr8:9276683-9277043	OrsajCp051	RPL20	NA	coding	possible functionality
IRGSP1.0	ONG0602940	Chr6:23563358-23592835	Chr6:23576045-23576405	OrsajCp051	RPL20	NA	coding	truncated
IRGSP1.0	ONG1200160	Chr12:5608911-5658338	Chr12:5643614-5643974	OrsajCp051	RPL20	NA	coding	truncated
IRGSP1.0	ONG0800260	Chr8:9242935-9284593	Chr8:9275110-9275761	OrsajCp052	clpP	NA	coding	possible functionality
IRGSP1.0	ONG0602940	Chr6:23563358-23592835	Chr6:23574472-23575123	OrsajCp052	clpP	NA	coding	possible functionality
IRGSP1.0	ONG1000180	Chr10:10790062-10920944	Chr10:10874744-10875395	OrsajCp052	clpP	NA	coding	possible functionality
IRGSP1.0	ONG1200160	Chr12:5608911-5658338	Chr12:5644896-5645547	OrsajCp052	clpP	NA	coding	possible functionality
IRGSP1.0	ONG1000180	Chr10:10790062-10920944	Chr10:10875906-10877433	OrsajCp053	psbB	NA	coding	possible functionality
IRGSP1.0	ONG0602940	Chr6:23563358-23592835	Chr6:23572434-23573961	OrsajCp053	psbB	NA	coding	possible functionality
IRGSP1.0	ONG0900070	Chr9:2494741-2497244	Chr9:2494837-2496364	OrsajCp053	psbB	NA	coding	possible functionality
IRGSP1.0	ONG0800260	Chr8:9242935-9284593	Chr8:9273065-9274599	OrsajCp053	psbB	NA	coding	truncated
IRGSP1.0	ONG1200160	Chr12:5608911-5658338	Chr12:5646059-5647587	OrsajCp053	psbB	NA	coding	truncated
IRGSP1.0	ONG0900070	Chr9:2494741-2497244	Chr9:2496528-2496636	OrsajCp054	psbT	NA	coding	possible functionality
IRGSP1.0	ONG0602940	Chr6:23563358-23592835	Chr6:23572162-23572270	OrsajCp054	psbT	NA	coding	possible functionality
IRGSP1.0	ONG1000180	Chr10:10790062-10920944	Chr10:10877597-10877705	OrsajCp054	psbT	NA	coding	possible functionality
IRGSP1.0	ONG0800150	Chr8:3784325-3784914	Chr8:3784663-3784771	OrsajCp054	psbT	NA	coding	possible functionality
IRGSP1.0	ONG0800260	Chr8:9242935-9284593	Chr8:9272793-9272901	OrsajCp054	psbT	NA	coding	possible functionality
IRGSP1.0	ONG0400170	Chr4:9089919-9210431	Chr4:9164283-9164387	OrsajCp054	psbT	NA	coding	truncated
IRGSP1.0	ONG1200160	Chr12:5608911-5658338	Chr12:5647751-5647859	OrsajCp054	psbT	NA	coding	possible functionality
IRGSP1.0	ONG1000180	Chr10:10790062-10920944	Chr10:10877753-10877885	OrsajCp055	psbN	NA	coding	possible functionality
IRGSP1.0	ONG0800260	Chr8:9242935-9284593	Chr8:9272613-9272745	OrsajCp055	psbN	NA	coding	possible functionality
IRGSP1.0	ONG0800150	Chr8:3784325-3784914	Chr8:3784484-3784615	OrsajCp055	psbN	NA	coding	truncated
IRGSP1.0	ONG0400170	Chr4:9089919-9210431	Chr4:9164103-9164235	OrsajCp055	psbN	NA	coding	possible functionality
IRGSP1.0	ONG1100400	Chr11:14548712-14553893	Chr11:14549144-14549276	OrsajCp055	psbN	NA	coding	possible functionality
IRGSP1.0	ONG1100550	Chr11:18688431-18688820	Chr11:18688628-18688760	OrsajCp055	psbN	NA	coding	possible functionality
IRGSP1.0	ONG0900070	Chr9:2494741-2497244	Chr9:2496684-2496816	OrsajCp055	psbN	NA	coding	possible functionality
IRGSP1.0	ONG0602940	Chr6:23563358-23592835	Chr6:23571983-23572114	OrsajCp055	psbN	NA	coding	truncated
IRGSP1.0	ONG1200160	Chr12:5608911-5658338	Chr12:5647907-5648039	OrsajCp055	psbN	NA	coding	possible functionality
IRGSP1.0	ONG0900070	Chr9:2494741-2497244	Chr9:2496919-2497141	OrsajCp056	psbH	NA	coding	possible functionality
IRGSP1.0	ONG0800260	Chr8:9242935-9284593	Chr8:9272288-9272510	OrsajCp056	psbH	NA	coding	possible functionality
IRGSP1.0	ONG0400170	Chr4:9089919-9210431	Chr4:9163778-9164000	OrsajCp056	psbH	NA	coding	possible functionality
IRGSP1.0	ONG1200160	Chr12:5608911-5658338	Chr12:5648142-5648363	OrsajCp056	psbH	NA	coding	truncated
IRGSP1.0	ONG0602940	Chr6:23563358-23592835	Chr6:23571657-23571879	OrsajCp056	psbH	NA	coding	possible functionality
IRGSP1.0	ONG1000180	Chr10:10790062-10920944	Chr10:10877988-10878210	OrsajCp056	psbH	NA	coding	possible functionality
IRGSP1.0	ONG1000180	Chr10:10790062-10920944	Chr10:10878339-10879799	OrsajCp057	petB	NA	coding	truncated
IRGSP1.0	ONG0400170	Chr4:9089919-9210431	Chr4:9162189-9163649	OrsajCp057	petB	NA	coding	truncated
IRGSP1.0	ONG0800260	Chr8:9242935-9284593	Chr8:9270699-9272159	OrsajCp057	petB	NA	coding	truncated
IRGSP1.0	ONG0602940	Chr6:23563358-23592835	Chr6:23570046-23571528	OrsajCp057	petB	NA	coding	truncated
IRGSP1.0	ONG0400170	Chr4:9089919-9210431	Chr4:9160767-9161998	OrsajCp058	petD	NA	coding	truncated
IRGSP1.0	ONG0100890	Chr1:33497812-33589786	Chr1:33499402-33500633	OrsajCp058	petD	NA	coding	truncated
IRGSP1.0	ONG0800260	Chr8:9242935-9284593	Chr8:9269277-9270508	OrsajCp058	petD	NA	coding	truncated
IRGSP1.0	ONG1000180	Chr10:10790062-10920944	Chr10:10879990-10881221	OrsajCp058	petD	NA	coding	truncated
IRGSP1.0	ONG0602940	Chr6:23563358-23592835	Chr6:23568625-23569855	OrsajCp058	petD	NA	coding	truncated
IRGSP1.0	ONG1200160	Chr12:5608911-5658338	Chr12:5653283-5654514	OrsajCp058	petD	NA	coding	truncated
IRGSP1.0	ONG0400170	Chr4:9089919-9210431	Chr4:9159534-9160548	OrsajCp059	rpoA	NA	coding	possible functionality
IRGSP1.0	ONG0800260	Chr8:9242935-9284593	Chr8:9268044-9269058	OrsajCp059	rpoA	NA	coding	possible functionality
IRGSP1.0	ONG0100890	Chr1:33497812-33589786	Chr1:33500852-33501866	OrsajCp059	rpoA	NA	coding	possible functionality
IRGSP1.0	ONG1000180	Chr10:10790062-10920944	Chr10:10881440-10882454	OrsajCp059	rpoA	NA	coding	possible functionality
IRGSP1.0	ONG0602940	Chr6:23563358-23592835	Chr6:23567392-23568406	OrsajCp059	rpoA	NA	coding	possible functionality
IRGSP1.0	ONG1200160	Chr12:5608911-5658338	Chr12:5654733-5655746	OrsajCp059	rpoA	NA	coding	truncated
IRGSP1.0	ONG1000180	Chr10:10790062-10920944	Chr10:10882517-10882949	OrsajCp060	RPS11	NA	coding	possible functionality
IRGSP1.0	ONG0400170	Chr4:9089919-9210431	Chr4:9159039-9159471	OrsajCp060	RPS11	NA	coding	possible functionality
IRGSP1.0	ONG0500290	Chr5:12886649-12892011	Chr5:12887429-12887861	OrsajCp060	RPS11	NA	coding	possible functionality
IRGSP1.0	ONG0800260	Chr8:9242935-9284593	Chr8:9267550-9267981	OrsajCp060	RPS11	NA	coding	truncated
IRGSP1.0	ONG0100890	Chr1:33497812-33589786	Chr1:33501929-33502361	OrsajCp060	RPS11	NA	coding	truncated
IRGSP1.0	ONG0602940	Chr6:23563358-23592835	Chr6:23566897-23567329	OrsajCp060	RPS11	NA	coding	possible functionality
IRGSP1.0	ONG0900100	Chr9:4037290-4042196	Chr9:4038260-4038693	OrsajCp060	RPS11	NA	coding	truncated
IRGSP1.0	ONG1200160	Chr12:5608911-5658338	Chr12:5655809-5656246	OrsajCp060	RPS11	NA	coding	truncated
IRGSP1.0	ONG0602940	Chr6:23563358-23592835	Chr6:23566610-23566724	OrsajCp061	RPL36	NA	coding	possible functionality
IRGSP1.0	ONG0500290	Chr5:12886649-12892011	Chr5:12888035-12888149	OrsajCp061	RPL36	NA	coding	possible functionality
IRGSP1.0	ONG0400170	Chr4:9089919-9210431	Chr4:9158753-9158867	OrsajCp061	RPL36	NA	coding	possible functionality
IRGSP1.0	ONG0100890	Chr1:33497812-33589786	Chr1:33502534-33502648	OrsajCp061	RPL36	NA	coding	possible functionality
IRGSP1.0	ONG1000180	Chr10:10790062-10920944	Chr10:10883121-10883235	OrsajCp061	RPL36	NA	coding	possible functionality
IRGSP1.0	ONG0800260	Chr8:9242935-9284593	Chr8:9267263-9267376	OrsajCp061	RPL36	NA	coding	truncated
IRGSP1.0	ONG1200160	Chr12:5608911-5658338	Chr12:5656419-5656529	OrsajCp061	RPL36	NA	coding	truncated
IRGSP1.0	ONG0500290	Chr5:12886649-12892011	Chr5:12888260-12888584	OrsajCp062	infA	NA	coding	possible functionality
IRGSP1.0	ONG0500440	Chr5:19687717-19691105	Chr5:19690677-19691001	OrsajCp062	infA	NA	coding	possible functionality
IRGSP1.0	ONG0400170	Chr4:9089919-9210431	Chr4:9158319-9158643	OrsajCp062	infA	NA	coding	possible functionality
IRGSP1.0	ONG0100890	Chr1:33497812-33589786	Chr1:33502758-33503082	OrsajCp062	infA	NA	coding	possible functionality
IRGSP1.0	ONG1000180	Chr10:10790062-10920944	Chr10:10883345-10883668	OrsajCp062	infA	NA	coding	truncated
IRGSP1.0	ONG0800260	Chr8:9242935-9284593	Chr8:9266830-9267153	OrsajCp062	infA	NA	coding	truncated
IRGSP1.0	ONG0700670	Chr7:27975238-27979870	Chr7:27975313-27975637	OrsajCp062	infA	NA	coding	possible functionality
IRGSP1.0	ONG1200160	Chr12:5608911-5658338	Chr12:5656703-5657026	OrsajCp062	infA	NA	coding	truncated
IRGSP1.0	ONG0602940	Chr6:23563358-23592835	Chr6:23566177-23566500	OrsajCp062	infA	NA	coding	truncated
IRGSP1.0	ONG0300520	Chr3:24749316-24751577	Chr3:24749367-24749691	OrsajCp062	infA	NA	coding	possible functionality
IRGSP1.0	ONG0800260	Chr8:9242935-9284593	Chr8:9266283-9266694	OrsajCp063	RPS8	NA	coding	possible functionality
IRGSP1.0	ONG0500290	Chr5:12886649-12892011	Chr5:12888721-12889132	OrsajCp063	RPS8	NA	coding	possible functionality
IRGSP1.0	ONG0500440	Chr5:19687717-19691105	Chr5:19690152-19690563	OrsajCp063	RPS8	NA	coding	truncated
IRGSP1.0	ONG0400170	Chr4:9089919-9210431	Chr4:9157778-9158189	OrsajCp063	RPS8	NA	coding	possible functionality
IRGSP1.0	ONG1200160	Chr12:5608911-5658338	Chr12:5657161-5657572	OrsajCp063	RPS8	NA	coding	possible functionality
IRGSP1.0	ONG1000180	Chr10:10790062-10920944	Chr10:10883798-10884209	OrsajCp063	RPS8	NA	coding	truncated
IRGSP1.0	ONG0100890	Chr1:33497812-33589786	Chr1:33503218-33503629	OrsajCp063	RPS8	NA	coding	possible functionality
IRGSP1.0	ONG0700670	Chr7:27975238-27979870	Chr7:27975772-27976183	OrsajCp063	RPS8	NA	coding	possible functionality
IRGSP1.0	ONG0900310	Chr9:11945700-11951058	Chr9:11950512-11950923	OrsajCp063	RPS8	NA	coding	possible functionality
IRGSP1.0	ONG0602940	Chr6:23563358-23592835	Chr6:23565632-23566043	OrsajCp063	RPS8	NA	coding	possible functionality
IRGSP1.0	ONG0300520	Chr3:24749316-24751577	Chr3:24749826-24750237	OrsajCp063	RPS8	NA	coding	truncated
IRGSP1.0	ONG1000180	Chr10:10790062-10920944	Chr10:10884348-10884720	OrsajCp064	RPL14	NA	coding	possible functionality
IRGSP1.0	ONG0800260	Chr8:9242935-9284593	Chr8:9265772-9266144	OrsajCp064	RPL14	NA	coding	possible functionality
IRGSP1.0	ONG0500290	Chr5:12886649-12892011	Chr5:12889271-12889643	OrsajCp064	RPL14	NA	coding	possible functionality
IRGSP1.0	ONG0500440	Chr5:19687717-19691105	Chr5:19689641-19690013	OrsajCp064	RPL14	NA	coding	possible functionality
IRGSP1.0	ONG0400170	Chr4:9089919-9210431	Chr4:9157267-9157639	OrsajCp064	RPL14	NA	coding	possible functionality
IRGSP1.0	ONG1200160	Chr12:5608911-5658338	Chr12:5657711-5658083	OrsajCp064	RPL14	NA	coding	possible functionality
IRGSP1.0	ONG0700670	Chr7:27975238-27979870	Chr7:27976322-27976694	OrsajCp064	RPL14	NA	coding	possible functionality
IRGSP1.0	ONG0100890	Chr1:33497812-33589786	Chr1:33503768-33504140	OrsajCp064	RPL14	NA	coding	possible functionality
IRGSP1.0	ONG0602940	Chr6:23563358-23592835	Chr6:23565121-23565493	OrsajCp064	RPL14	NA	coding	possible functionality
IRGSP1.0	ONG0900310	Chr9:11945700-11951058	Chr9:11950001-11950373	OrsajCp064	RPL14	NA	coding	possible functionality
IRGSP1.0	ONG0400170	Chr4:9089919-9210431	Chr4:9155649-9157117	OrsajCp065	RPL16	NA	coding	truncated
IRGSP1.0	ONG0500290	Chr5:12886649-12892011	Chr5:12889752-12891217	OrsajCp065	RPL16	NA	coding	truncated
IRGSP1.0	ONG0500440	Chr5:19687717-19691105	Chr5:19688075-19689531	OrsajCp065	RPL16	NA	coding	truncated
IRGSP1.0	ONG0900360	Chr9:14505285-14510719	Chr9:14509138-14510602	OrsajCp065	RPL16	NA	coding	truncated
IRGSP1.0	ONG0900310	Chr9:11945700-11951058	Chr9:11948446-11949891	OrsajCp065	RPL16	NA	coding	truncated
IRGSP1.0	ONG0800260	Chr8:9242935-9284593	Chr8:9264202-9265662	OrsajCp065	RPL16	NA	coding	truncated
IRGSP1.0	ONG1000180	Chr10:10790062-10920944	Chr10:10884830-10886291	OrsajCp065	RPL16	NA	coding	truncated
IRGSP1.0	ONG0700670	Chr7:27975238-27979870	Chr7:27976803-27978262	OrsajCp065	RPL16	NA	coding	truncated
IRGSP1.0	ONG0602940	Chr6:23563358-23592835	Chr6:23563562-23565012	OrsajCp065	RPL16	NA	coding	truncated
IRGSP1.0	ONG0900360	Chr9:14505285-14510719	Chr9:14508273-14508993	OrsajCp066	RPS3	NA	coding	possible functionality
IRGSP1.0	ONG0900310	Chr9:11945700-11951058	Chr9:11947581-11948301	OrsajCp066	RPS3	NA	coding	truncated
IRGSP1.0	ONG0400170	Chr4:9089919-9210431	Chr4:9154784-9155504	OrsajCp066	RPS3	NA	coding	possible functionality
IRGSP1.0	ONG1000180	Chr10:10790062-10920944	Chr10:10886436-10887156	OrsajCp066	RPS3	NA	coding	possible functionality
IRGSP1.0	ONG0800260	Chr8:9242935-9284593	Chr8:9263337-9264057	OrsajCp066	RPS3	NA	coding	possible functionality
IRGSP1.0	ONG0700670	Chr7:27975238-27979870	Chr7:27978407-27979128	OrsajCp066	RPS3	NA	coding	truncated
IRGSP1.0	ONG0800260	Chr8:9242935-9284593	Chr8:9262833-9263283	OrsajCp067	RPL22	NA	coding	possible functionality
IRGSP1.0	ONG1000180	Chr10:10790062-10920944	Chr10:10887211-10887662	OrsajCp067	RPL22	NA	coding	truncated
IRGSP1.0	ONG0900360	Chr9:14505285-14510719	Chr9:14507770-14508220	OrsajCp067	RPL22	NA	coding	possible functionality
IRGSP1.0	ONG0900310	Chr9:11945700-11951058	Chr9:11947080-11947528	OrsajCp067	RPL22	NA	coding	truncated
IRGSP1.0	ONG0700670	Chr7:27975238-27979870	Chr7:27979182-27979632	OrsajCp067	RPL22	NA	coding	possible functionality
IRGSP1.0	ONG0400170	Chr4:9089919-9210431	Chr4:9154280-9154730	OrsajCp067	RPL22	NA	coding	possible functionality
IRGSP1.0	ONG1200500	Chr12:18287170-18287644	Chr12:18287208-18287644	OrsajCp067	RPL22	NA	coding	truncated
IRGSP1.0	ONG0900360	Chr9:14505285-14510719	Chr9:14507175-14507424	OrsajCp068	ORF82	NA	coding	possible functionality
IRGSP1.0	ONG0900310	Chr9:11945700-11951058	Chr9:11946485-11946735	OrsajCp068	ORF82	NA	coding	truncated
IRGSP1.0	ONG0800260	Chr8:9242935-9284593	Chr8:9262238-9262487	OrsajCp068	ORF82	NA	coding	possible functionality
IRGSP1.0	ONG0800690	Chr8:22322551-22327776	Chr8:22326052-22326301	OrsajCp068	ORF82	NA	coding	possible functionality
IRGSP1.0	ONG0700310	Chr7:14230357-14244746	Chr7:14244175-14244424	OrsajCp068	ORF82	NA	coding	possible functionality
IRGSP1.0	ONG0400170	Chr4:9089919-9210431	Chr4:9137642-9137891	OrsajCp068	ORF82	NA	coding	possible functionality
IRGSP1.0	ONG0400170	Chr4:9089919-9210431	Chr4:9153683-9153932	OrsajCp068	ORF82	NA	coding	possible functionality
IRGSP1.0	ONG0400650	Chr4:23636684-23660553	Chr4:23654421-23654669	OrsajCp068	ORF82	NA	coding	truncated
IRGSP1.0	ONG1000180	Chr10:10790062-10920944	Chr10:10806624-10806873	OrsajCp068	ORF82	NA	coding	possible functionality
IRGSP1.0	ONG1000500	Chr10:21334663-21337365	Chr10:21336088-21336337	OrsajCp068	ORF82	NA	coding	possible functionality
IRGSP1.0	ONG1000180	Chr10:10790062-10920944	Chr10:10888009-10888258	OrsajCp068	ORF82	NA	coding	possible functionality
IRGSP1.0	ONG1200350	Chr12:11409052-11414526	Chr12:11413411-11413661	OrsajCp068	ORF82	NA	coding	truncated
IRGSP1.0	ONG0600600	Chr6:23710795-23715049	Chr6:23714697-23714934	OrsajCp068	ORF82	NA	coding	truncated
IRGSP1.0	ONG0900310	Chr9:11945700-11951058	Chr9:11946524-11946599	OrsajCt145	trnH	NA	non-coding	non-coding
IRGSP1.0	ONG0900360	Chr9:14505285-14510719	Chr9:14507214-14507289	OrsajCt145	trnH	NA	non-coding	non-coding
IRGSP1.0	ONG0800260	Chr8:9242935-9284593	Chr8:9262277-9262352	OrsajCt145	trnH	NA	non-coding	non-coding
IRGSP1.0	ONG0800690	Chr8:22322551-22327776	Chr8:22326187-22326262	OrsajCt145	trnH	NA	non-coding	non-coding
IRGSP1.0	ONG0700310	Chr7:14230357-14244746	Chr7:14244214-14244289	OrsajCt145	trnH	NA	non-coding	non-coding
IRGSP1.0	ONG0400170	Chr4:9089919-9210431	Chr4:9137777-9137852	OrsajCt145	trnH	NA	non-coding	non-coding
IRGSP1.0	ONG0400170	Chr4:9089919-9210431	Chr4:9153722-9153797	OrsajCt145	trnH	NA	non-coding	non-coding
IRGSP1.0	ONG0400650	Chr4:23636684-23660553	Chr4:23654556-23654631	OrsajCt145	trnH	NA	non-coding	non-coding
IRGSP1.0	ONG1200350	Chr12:11409052-11414526	Chr12:11413547-11413622	OrsajCt145	trnH	NA	non-coding	non-coding
IRGSP1.0	ONG1000180	Chr10:10790062-10920944	Chr10:10806663-10806738	OrsajCt145	trnH	NA	non-coding	non-coding
IRGSP1.0	ONG1000180	Chr10:10790062-10920944	Chr10:10888144-10888219	OrsajCt145	trnH	NA	non-coding	non-coding
IRGSP1.0	ONG1000500	Chr10:21334663-21337365	Chr10:21336223-21336298	OrsajCt145	trnH	NA	non-coding	non-coding
IRGSP1.0	ONG0300230	Chr3:13640562-13649805	Chr3:13645536-13645611	OrsajCt145	trnH	NA	non-coding	non-coding
IRGSP1.0	ONG1100060	Chr11:3500264-3500373	Chr11:3500291-3500364	OrsajCt145	trnH	NA	non-coding	non-coding
IRGSP1.0	ONG0900360	Chr9:14505285-14510719	Chr9:14505674-14507159	OrsajCp069	RPL2	NA	coding	truncated
IRGSP1.0	ONG0700310	Chr7:14230357-14244746	Chr7:14242674-14244159	OrsajCp069	RPL2	NA	coding	truncated
IRGSP1.0	ONG0400170	Chr4:9089919-9210431	Chr4:9137907-9139392	OrsajCp069	RPL2	NA	coding	truncated
IRGSP1.0	ONG0400170	Chr4:9089919-9210431	Chr4:9152182-9153667	OrsajCp069	RPL2	NA	coding	truncated
IRGSP1.0	ONG0400650	Chr4:23636684-23660553	Chr4:23654685-23656166	OrsajCp069	RPL2	NA	coding	truncated
IRGSP1.0	ONG0800260	Chr8:9242935-9284593	Chr8:9260737-9262222	OrsajCp069	RPL2	NA	coding	truncated
IRGSP1.0	ONG0800690	Chr8:22322551-22327776	Chr8:22326317-22327776	OrsajCp069	RPL2	NA	coding	truncated
IRGSP1.0	ONG1000180	Chr10:10790062-10920944	Chr10:10805123-10806608	OrsajCp069	RPL2	NA	coding	truncated
IRGSP1.0	ONG1000180	Chr10:10790062-10920944	Chr10:10888274-10889759	OrsajCp069	RPL2	NA	coding	truncated
IRGSP1.0	ONG0900360	Chr9:14505285-14510719	Chr9:14506639-14507053	OrsajCp070	ORF137	NA	coding	possible functionality
IRGSP1.0	ONG0900310	Chr9:11945700-11951058	Chr9:11945950-11946364	OrsajCp070	ORF137	NA	coding	truncated
IRGSP1.0	ONG0800260	Chr8:9242935-9284593	Chr8:9261702-9262116	OrsajCp070	ORF137	NA	coding	possible functionality
IRGSP1.0	ONG0800690	Chr8:22322551-22327776	Chr8:22326423-22326837	OrsajCp070	ORF137	NA	coding	possible functionality
IRGSP1.0	ONG0700310	Chr7:14230357-14244746	Chr7:14243639-14244053	OrsajCp070	ORF137	NA	coding	possible functionality
IRGSP1.0	ONG0400170	Chr4:9089919-9210431	Chr4:9138013-9138427	OrsajCp070	ORF137	NA	coding	possible functionality
IRGSP1.0	ONG0400170	Chr4:9089919-9210431	Chr4:9153147-9153561	OrsajCp070	ORF137	NA	coding	possible functionality
IRGSP1.0	ONG0400650	Chr4:23636684-23660553	Chr4:23654791-23655205	OrsajCp070	ORF137	NA	coding	possible functionality
IRGSP1.0	ONG1000180	Chr10:10790062-10920944	Chr10:10806088-10806502	OrsajCp070	ORF137	NA	coding	possible functionality
IRGSP1.0	ONG1000180	Chr10:10790062-10920944	Chr10:10888380-10888794	OrsajCp070	ORF137	NA	coding	possible functionality
IRGSP1.0	ONG1000500	Chr10:21334663-21337365	Chr10:21336458-21336872	OrsajCp070	ORF137	NA	coding	possible functionality
IRGSP1.0	ONG1200350	Chr12:11409052-11414526	Chr12:11413783-11414198	OrsajCp070	ORF137	NA	coding	truncated
IRGSP1.0	ONG1000180	Chr10:10790062-10920944	Chr10:10889777-10890059	OrsajCp071	RPL23	NA	coding	possible functionality
IRGSP1.0	ONG1000180	Chr10:10790062-10920944	Chr10:10804823-10805105	OrsajCp071	RPL23	NA	coding	possible functionality
IRGSP1.0	ONG1000560	Chr10:22770722-22773728	Chr10:22771846-22772128	OrsajCp071	RPL23	NA	coding	possible functionality
IRGSP1.0	ONG0900360	Chr9:14505285-14510719	Chr9:14505374-14505656	OrsajCp071	RPL23	NA	coding	possible functionality
IRGSP1.0	ONG0700310	Chr7:14230357-14244746	Chr7:14242374-14242656	OrsajCp071	RPL23	NA	coding	possible functionality
IRGSP1.0	ONG0400170	Chr4:9089919-9210431	Chr4:9139410-9139692	OrsajCp071	RPL23	NA	coding	possible functionality
IRGSP1.0	ONG0400170	Chr4:9089919-9210431	Chr4:9151882-9152164	OrsajCp071	RPL23	NA	coding	possible functionality
IRGSP1.0	ONG0400650	Chr4:23636684-23660553	Chr4:23656188-23656470	OrsajCp071	RPL23	NA	coding	possible functionality
IRGSP1.0	ONG0800260	Chr8:9242935-9284593	Chr8:9260437-9260719	OrsajCp071	RPL23	NA	coding	possible functionality
IRGSP1.0	ONG0100770	Chr1:28414885-28415224	Chr1:28414949-28415224	OrsajCp071	RPL23	NA	coding	truncated
IRGSP1.0	ONG1000180	Chr10:10790062-10920944	Chr10:10804575-10804649	OrsajCt146	trnI	NA	non-coding	non-coding
IRGSP1.0	ONG1000180	Chr10:10790062-10920944	Chr10:10890232-10890306	OrsajCt146	trnI	NA	non-coding	non-coding
IRGSP1.0	ONG1000560	Chr10:22770722-22773728	Chr10:22772302-22772376	OrsajCt146	trnI	NA	non-coding	non-coding
IRGSP1.0	ONG0800260	Chr8:9242935-9284593	Chr8:9260189-9260263	OrsajCt146	trnI	NA	non-coding	non-coding
IRGSP1.0	ONG0700310	Chr7:14230357-14244746	Chr7:14242126-14242200	OrsajCt146	trnI	NA	non-coding	non-coding
IRGSP1.0	ONG0400170	Chr4:9089919-9210431	Chr4:9139866-9139940	OrsajCt146	trnI	NA	non-coding	non-coding
IRGSP1.0	ONG0400170	Chr4:9089919-9210431	Chr4:9151634-9151708	OrsajCt146	trnI	NA	non-coding	non-coding
IRGSP1.0	ONG0400650	Chr4:23636684-23660553	Chr4:23656644-23656718	OrsajCt146	trnI	NA	non-coding	non-coding
IRGSP1.0	ONG1000180	Chr10:10790062-10920944	Chr10:10804167-10804254	OrsajCp072	ORF28	NA	coding	possible functionality
IRGSP1.0	ONG1000180	Chr10:10790062-10920944	Chr10:10890627-10890714	OrsajCp072	ORF28	NA	coding	possible functionality
IRGSP1.0	ONG1000560	Chr10:22770722-22773728	Chr10:22772697-22772784	OrsajCp072	ORF28	NA	coding	possible functionality
IRGSP1.0	ONG0700310	Chr7:14230357-14244746	Chr7:14241718-14241805	OrsajCp072	ORF28	NA	coding	possible functionality
IRGSP1.0	ONG0400170	Chr4:9089919-9210431	Chr4:9140261-9140348	OrsajCp072	ORF28	NA	coding	possible functionality
IRGSP1.0	ONG0400170	Chr4:9089919-9210431	Chr4:9151226-9151313	OrsajCp072	ORF28	NA	coding	possible functionality
IRGSP1.0	ONG0400650	Chr4:23636684-23660553	Chr4:23657039-23657126	OrsajCp072	ORF28	NA	coding	possible functionality
IRGSP1.0	ONG0800260	Chr8:9242935-9284593	Chr8:9259781-9259868	OrsajCp072	ORF28	NA	coding	possible functionality
IRGSP1.0	ONG0200380	Chr2:15956662-15956977	Chr2:15956859-15956943	OrsajCp072	ORF28	NA	coding	truncated
IRGSP1.0	ONG0500070	Chr5:2924473-2924765	Chr5:2924503-2924589	OrsajCp072	ORF28	NA	coding	truncated
IRGSP1.0	ONG1000180	Chr10:10790062-10920944	Chr10:10891090-10891840	OrsajCp074	ORF249	NA	coding	possible functionality
IRGSP1.0	ONG1000180	Chr10:10790062-10920944	Chr10:10803041-10803791	OrsajCp074	ORF249	NA	coding	possible functionality
IRGSP1.0	ONG0800260	Chr8:9242935-9284593	Chr8:9258655-9259405	OrsajCp074	ORF249	NA	coding	possible functionality
IRGSP1.0	ONG0700310	Chr7:14230357-14244746	Chr7:14240592-14241342	OrsajCp074	ORF249	NA	coding	possible functionality
IRGSP1.0	ONG0400170	Chr4:9089919-9210431	Chr4:9150100-9150850	OrsajCp074	ORF249	NA	coding	possible functionality
IRGSP1.0	ONG0400170	Chr4:9089919-9210431	Chr4:9140715-9141464	OrsajCp074	ORF249	NA	coding	truncated
IRGSP1.0	ONG0500620	Chr5:12954916-12985817	Chr5:12984943-12985693	OrsajCp074	ORF249	NA	coding	possible functionality
IRGSP1.0	ONG1000180	Chr10:10790062-10920944	Chr10:10802996-10803077	OrsajCt147	trnL	NA	non-coding	non-coding
IRGSP1.0	ONG1000180	Chr10:10790062-10920944	Chr10:10891804-10891885	OrsajCt147	trnL	NA	non-coding	non-coding
IRGSP1.0	ONG0800260	Chr8:9242935-9284593	Chr8:9258610-9258691	OrsajCt147	trnL	NA	non-coding	non-coding
IRGSP1.0	ONG0700310	Chr7:14230357-14244746	Chr7:14240547-14240628	OrsajCt147	trnL	NA	non-coding	non-coding
IRGSP1.0	ONG0500620	Chr5:12954916-12985817	Chr5:12984898-12984979	OrsajCt147	trnL	NA	non-coding	non-coding
IRGSP1.0	ONG0400170	Chr4:9089919-9210431	Chr4:9141428-9141509	OrsajCt147	trnL	NA	non-coding	non-coding
IRGSP1.0	ONG0400170	Chr4:9089919-9210431	Chr4:9150055-9150136	OrsajCt147	trnL	NA	non-coding	non-coding
IRGSP1.0	ONG0200320	Chr2:14239661-14289647	Chr2:14255768-14255849	OrsajCt147	trnL	NA	non-coding	non-coding
IRGSP1.0	ONG0300960	Chr3:35999446-36000996	Chr3:36000076-36000154	OrsajCt147	trnL	NA	non-coding	non-coding
IRGSP1.0	ONG0600130	Chr6:7001742-7002156	Chr6:7001761-7001841	OrsajCt147	trnL	NA	non-coding	non-coding
IRGSP1.0	ONG0900250	Chr9:9918818-9919156	Chr9:9919026-9919107	OrsajCt147	trnL	NA	non-coding	non-coding
IRGSP1.0	ONG0900170	Chr9:6600375-6600747	Chr9:6600495-6600574	OrsajCt147	trnL	NA	non-coding	non-coding
IRGSP1.0	ONG0700310	Chr7:14230357-14244746	Chr7:14237699-14239944	OrsajCp075	ndhB	NA	coding	truncated
IRGSP1.0	ONG0400170	Chr4:9089919-9210431	Chr4:9116366-9118611	OrsajCp075	ndhB	NA	coding	truncated
IRGSP1.0	ONG0400170	Chr4:9089919-9210431	Chr4:9147207-9149452	OrsajCp075	ndhB	NA	coding	truncated
IRGSP1.0	ONG0400170	Chr4:9089919-9210431	Chr4:9164683-9166928	OrsajCp075	ndhB	NA	coding	truncated
IRGSP1.0	ONG0400490	Chr4:19097950-19103087	Chr4:19097950-19100116	OrsajCp075	ndhB	NA	coding	truncated
IRGSP1.0	ONG0800260	Chr8:9242935-9284593	Chr8:9255762-9258007	OrsajCp075	ndhB	NA	coding	truncated
IRGSP1.0	ONG1000180	Chr10:10790062-10920944	Chr10:10800150-10802393	OrsajCp075	ndhB	NA	coding	truncated
IRGSP1.0	ONG1000180	Chr10:10790062-10920944	Chr10:10892488-10894737	OrsajCp075	ndhB	1 of 8 edited	coding	truncated
IRGSP1.0	ONG0500620	Chr5:12954916-12985817	Chr5:12982051-12984295	OrsajCp075	ndhB	NA	coding	truncated
IRGSP1.0	ONG1000180	Chr10:10790062-10920944	Chr10:10895036-10895507	OrsajCp076	RPS7	NA	coding	possible functionality
IRGSP1.0	ONG1000180	Chr10:10790062-10920944	Chr10:10799380-10799851	OrsajCp076	RPS7	NA	coding	possible functionality
IRGSP1.0	ONG0800260	Chr8:9242935-9284593	Chr8:9254992-9255463	OrsajCp076	RPS7	NA	coding	possible functionality
IRGSP1.0	ONG0700310	Chr7:14230357-14244746	Chr7:14236929-14237400	OrsajCp076	RPS7	NA	coding	possible functionality
IRGSP1.0	ONG0400170	Chr4:9089919-9210431	Chr4:9118910-9119381	OrsajCp076	RPS7	NA	coding	possible functionality
IRGSP1.0	ONG0400170	Chr4:9089919-9210431	Chr4:9167227-9167698	OrsajCp076	RPS7	NA	coding	possible functionality
IRGSP1.0	ONG0400170	Chr4:9089919-9210431	Chr4:9199103-9199574	OrsajCp076	RPS7	NA	coding	possible functionality
IRGSP1.0	ONG0400170	Chr4:9089919-9210431	Chr4:9090825-9091296	OrsajCp076	RPS7	NA	coding	possible functionality
IRGSP1.0	ONG0400170	Chr4:9089919-9210431	Chr4:9146437-9146908	OrsajCp076	RPS7	NA	coding	possible functionality
IRGSP1.0	ONG0400490	Chr4:19097950-19103087	Chr4:19100415-19100886	OrsajCp076	RPS7	NA	coding	truncated
IRGSP1.0	ONG0200320	Chr2:14239661-14289647	Chr2:14242354-14242825	OrsajCp076	RPS7	NA	coding	possible functionality
IRGSP1.0	ONG1000180	Chr10:10790062-10920944	Chr10:10797352-10797569	OrsajCp077	ORF72	NA	coding	truncated
IRGSP1.0	ONG1000180	Chr10:10790062-10920944	Chr10:10897317-10897534	OrsajCp077	ORF72	NA	coding	truncated
IRGSP1.0	ONG1000480	Chr10:20451714-20484688	Chr10:20452319-20452536	OrsajCp077	ORF72	NA	coding	truncated
IRGSP1.0	ONG0800260	Chr8:9242935-9284593	Chr8:9252962-9253179	OrsajCp077	ORF72	NA	coding	truncated
IRGSP1.0	ONG0700310	Chr7:14230357-14244746	Chr7:14234900-14235117	OrsajCp077	ORF72	NA	coding	truncated
IRGSP1.0	ONG0400170	Chr4:9089919-9210431	Chr4:9093107-9093324	OrsajCp077	ORF72	NA	coding	truncated
IRGSP1.0	ONG0400170	Chr4:9089919-9210431	Chr4:9144408-9144625	OrsajCp077	ORF72	NA	coding	truncated
IRGSP1.0	ONG0400170	Chr4:9089919-9210431	Chr4:9169510-9169727	OrsajCp077	ORF72	NA	coding	truncated
IRGSP1.0	ONG0400170	Chr4:9089919-9210431	Chr4:9201385-9201602	OrsajCp077	ORF72	NA	coding	truncated
IRGSP1.0	ONG0400490	Chr4:19097950-19103087	Chr4:19102695-19102912	OrsajCp077	ORF72	NA	coding	truncated
IRGSP1.0	ONG0500030	Chr5:915183-917773	Chr5:917340-917557	OrsajCp077	ORF72	NA	coding	truncated
IRGSP1.0	ONG0500620	Chr5:12954916-12985817	Chr5:12975653-12975869	OrsajCp077	ORF72	NA	coding	truncated
IRGSP1.0	ONG0200320	Chr2:14239661-14289647	Chr2:14244636-14244853	OrsajCp077	ORF72	NA	coding	truncated
IRGSP1.0	ONG0200010	Chr2:807669-818565	Chr2:813091-813307	OrsajCp077	ORF72	NA	coding	truncated
IRGSP1.0	ONG1000180	Chr10:10790062-10920944	Chr10:10797135-10797293	OrsajCp078	ORF85	NA	coding	truncated
IRGSP1.0	ONG1000480	Chr10:20451714-20484688	Chr10:20452595-20452753	OrsajCp078	ORF85	NA	coding	truncated
IRGSP1.0	ONG1000180	Chr10:10790062-10920944	Chr10:10897593-10897751	OrsajCp078	ORF85	NA	coding	truncated
IRGSP1.0	ONG0800260	Chr8:9242935-9284593	Chr8:9252745-9252903	OrsajCp078	ORF85	NA	coding	truncated
IRGSP1.0	ONG0700310	Chr7:14230357-14244746	Chr7:14234683-14234841	OrsajCp078	ORF85	NA	coding	truncated
IRGSP1.0	ONG0500030	Chr5:915183-917773	Chr5:917123-917281	OrsajCp078	ORF85	NA	coding	truncated
IRGSP1.0	ONG0500620	Chr5:12954916-12985817	Chr5:12975436-12975594	OrsajCp078	ORF85	NA	coding	truncated
IRGSP1.0	ONG0400170	Chr4:9089919-9210431	Chr4:9093383-9093541	OrsajCp078	ORF85	NA	coding	truncated
IRGSP1.0	ONG0400170	Chr4:9089919-9210431	Chr4:9144191-9144349	OrsajCp078	ORF85	NA	coding	truncated
IRGSP1.0	ONG0400170	Chr4:9089919-9210431	Chr4:9169786-9169944	OrsajCp078	ORF85	NA	coding	truncated
IRGSP1.0	ONG0400170	Chr4:9089919-9210431	Chr4:9201661-9201819	OrsajCp078	ORF85	NA	coding	truncated
IRGSP1.0	ONG0200320	Chr2:14239661-14289647	Chr2:14244912-14245070	OrsajCp078	ORF85	NA	coding	truncated
IRGSP1.0	ONG0200010	Chr2:807669-818565	Chr2:812873-813031	OrsajCp078	ORF85	NA	coding	truncated
IRGSP1.0	ONG1200300	Chr12:9362396-9366099	Chr12:9365901-9366060	OrsajCp078	ORF85	NA	coding	truncated
IRGSP1.0	ONG1000180	Chr10:10790062-10920944	Chr10:10796727-10796799	OrsajCt148	trnV	NA	non-coding	non-coding
IRGSP1.0	ONG1000180	Chr10:10790062-10920944	Chr10:10898087-10898159	OrsajCt148	trnV	NA	non-coding	non-coding
IRGSP1.0	ONG1000480	Chr10:20451714-20484688	Chr10:20453089-20453161	OrsajCt148	trnV	NA	non-coding	non-coding
IRGSP1.0	ONG0800260	Chr8:9242935-9284593	Chr8:9252337-9252409	OrsajCt148	trnV	NA	non-coding	non-coding
IRGSP1.0	ONG0700310	Chr7:14230357-14244746	Chr7:14234275-14234347	OrsajCt148	trnV	NA	non-coding	non-coding
IRGSP1.0	ONG0500620	Chr5:12954916-12985817	Chr5:12975028-12975100	OrsajCt148	trnV	NA	non-coding	non-coding
IRGSP1.0	ONG0500030	Chr5:915183-917773	Chr5:916715-916787	OrsajCt148	trnV	NA	non-coding	non-coding
IRGSP1.0	ONG0400170	Chr4:9089919-9210431	Chr4:9093877-9093949	OrsajCt148	trnV	NA	non-coding	non-coding
IRGSP1.0	ONG0400170	Chr4:9089919-9210431	Chr4:9202155-9202227	OrsajCt148	trnV	NA	non-coding	non-coding
IRGSP1.0	ONG0400170	Chr4:9089919-9210431	Chr4:9143783-9143855	OrsajCt148	trnV	NA	non-coding	non-coding
IRGSP1.0	ONG0400170	Chr4:9089919-9210431	Chr4:9170280-9170352	OrsajCt148	trnV	NA	non-coding	non-coding
IRGSP1.0	ONG0200010	Chr2:807669-818565	Chr2:812458-812530	OrsajCt148	trnV	NA	non-coding	non-coding
IRGSP1.0	ONG0200320	Chr2:14239661-14289647	Chr2:14245406-14245478	OrsajCt148	trnV	NA	non-coding	non-coding
IRGSP1.0	ONG0300950	Chr3:35602629-35604832	Chr3:35604213-35604285	OrsajCt148	trnV	NA	non-coding	non-coding
IRGSP1.0	ONG1000480	Chr10:20451714-20484688	Chr10:20453392-20454883	OrsajCr113	OrsajCr113	NA	non-coding	non-coding
IRGSP1.0	ONG1000180	Chr10:10790062-10920944	Chr10:10795019-10796496	OrsajCr113	OrsajCr113	NA	non-coding	non-coding
IRGSP1.0	ONG1000180	Chr10:10790062-10920944	Chr10:10898389-10899862	OrsajCr113	OrsajCr113	NA	non-coding	non-coding
IRGSP1.0	ONG0400170	Chr4:9089919-9210431	Chr4:9170583-9172074	OrsajCr113	OrsajCr113	NA	non-coding	non-coding
IRGSP1.0	ONG0400170	Chr4:9089919-9210431	Chr4:9202458-9203949	OrsajCr113	OrsajCr113	NA	non-coding	non-coding
IRGSP1.0	ONG0400170	Chr4:9089919-9210431	Chr4:9094180-9095671	OrsajCr113	OrsajCr113	NA	non-coding	non-coding
IRGSP1.0	ONG0800260	Chr8:9242935-9284593	Chr8:9250615-9252106	OrsajCr113	OrsajCr113	NA	non-coding	non-coding
IRGSP1.0	ONG0700310	Chr7:14230357-14244746	Chr7:14232553-14234044	OrsajCr113	OrsajCr113	NA	non-coding	non-coding
IRGSP1.0	ONG0200320	Chr2:14239661-14289647	Chr2:14245709-14247200	OrsajCr113	OrsajCr113	NA	non-coding	non-coding
IRGSP1.0	ONG0700310	Chr7:14230357-14244746	Chr7:14231221-14232240	OrsajCt149	OrsajCt149	NA	non-coding	non-coding
IRGSP1.0	ONG0400170	Chr4:9089919-9210431	Chr4:9095981-9097000	OrsajCt149	OrsajCt149	NA	non-coding	non-coding
IRGSP1.0	ONG0400170	Chr4:9089919-9210431	Chr4:9204261-9205280	OrsajCt149	OrsajCt149	NA	non-coding	non-coding
IRGSP1.0	ONG1000480	Chr10:20451714-20484688	Chr10:20455193-20456212	OrsajCt149	OrsajCt149	NA	non-coding	non-coding
IRGSP1.0	ONG1000180	Chr10:10790062-10920944	Chr10:10793684-10794703	OrsajCt149	OrsajCt149	NA	non-coding	non-coding
IRGSP1.0	ONG1000180	Chr10:10790062-10920944	Chr10:10900174-10901197	OrsajCt149	OrsajCt149	NA	non-coding	non-coding
IRGSP1.0	ONG0200320	Chr2:14239661-14289647	Chr2:14247509-14248531	OrsajCt149	OrsajCt149	NA	non-coding	non-coding
IRGSP1.0	ONG0500620	Chr5:12954916-12985817	Chr5:12960562-12961585	OrsajCt149	OrsajCt149	NA	non-coding	non-coding
IRGSP1.0	ONG1000480	Chr10:20451714-20484688	Chr10:20455334-20455736	OrsajCp079	ORF133	NA	coding	possible functionality
IRGSP1.0	ONG1000180	Chr10:10790062-10920944	Chr10:10794160-10794562	OrsajCp079	ORF133	NA	coding	possible functionality
IRGSP1.0	ONG1000180	Chr10:10790062-10920944	Chr10:10900315-10900719	OrsajCp079	ORF133	NA	coding	truncated
IRGSP1.0	ONG0700310	Chr7:14230357-14244746	Chr7:14231697-14232099	OrsajCp079	ORF133	NA	coding	possible functionality
IRGSP1.0	ONG0400170	Chr4:9089919-9210431	Chr4:9096122-9096524	OrsajCp079	ORF133	NA	coding	possible functionality
IRGSP1.0	ONG0400170	Chr4:9089919-9210431	Chr4:9204402-9204804	OrsajCp079	ORF133	NA	coding	possible functionality
IRGSP1.0	ONG0800260	Chr8:9242935-9284593	Chr8:9249754-9250156	OrsajCp079	ORF133	NA	coding	possible functionality
IRGSP1.0	ONG0200320	Chr2:14239661-14289647	Chr2:14247650-14248055	OrsajCp079	ORF133	NA	coding	possible functionality
IRGSP1.0	ONG0500620	Chr5:12954916-12985817	Chr5:12961038-12961444	OrsajCp079	ORF133	NA	coding	truncated
IRGSP1.0	ONG1000480	Chr10:20451714-20484688	Chr10:20456276-20457160	OrsajCt150	OrsajCt150	NA	non-coding	non-coding
IRGSP1.0	ONG1000180	Chr10:10790062-10920944	Chr10:10901261-10902145	OrsajCt150	OrsajCt150	NA	non-coding	non-coding
IRGSP1.0	ONG1000180	Chr10:10790062-10920944	Chr10:10792736-10793620	OrsajCt150	OrsajCt150	NA	non-coding	non-coding
IRGSP1.0	ONG0400170	Chr4:9089919-9210431	Chr4:9097064-9097948	OrsajCt150	OrsajCt150	NA	non-coding	non-coding
IRGSP1.0	ONG0400170	Chr4:9089919-9210431	Chr4:9205344-9206223	OrsajCt150	OrsajCt150	NA	non-coding	non-coding
IRGSP1.0	ONG0200320	Chr2:14239661-14289647	Chr2:14248595-14249479	OrsajCt150	OrsajCt150	NA	non-coding	non-coding
IRGSP1.0	ONG0800260	Chr8:9242935-9284593	Chr8:9248622-9249506	OrsajCt150	OrsajCt150	NA	non-coding	non-coding
IRGSP1.0	ONG0500620	Chr5:12954916-12985817	Chr5:12959614-12960498	OrsajCt150	OrsajCt150	NA	non-coding	non-coding
IRGSP1.0	ONG1000480	Chr10:20451714-20484688	Chr10:20456775-20457105	OrsajCp080	ORF109	NA	coding	truncated
IRGSP1.0	ONG1000180	Chr10:10790062-10920944	Chr10:10901760-10902090	OrsajCp080	ORF109	NA	coding	truncated
IRGSP1.0	ONG1000180	Chr10:10790062-10920944	Chr10:10792791-10793121	OrsajCp080	ORF109	NA	coding	truncated
IRGSP1.0	ONG0400170	Chr4:9089919-9210431	Chr4:9097563-9097893	OrsajCp080	ORF109	NA	coding	truncated
IRGSP1.0	ONG0400170	Chr4:9089919-9210431	Chr4:9205838-9206168	OrsajCp080	ORF109	NA	coding	truncated
IRGSP1.0	ONG0200320	Chr2:14239661-14289647	Chr2:14249094-14249424	OrsajCp080	ORF109	NA	coding	truncated
IRGSP1.0	ONG0800260	Chr8:9242935-9284593	Chr8:9248677-9249007	OrsajCp080	ORF109	NA	coding	truncated
IRGSP1.0	ONG0500620	Chr5:12954916-12985817	Chr5:12959669-12959999	OrsajCp080	ORF109	NA	coding	truncated
IRGSP1.0	ONG0300820	Chr3:31809345-31821856	Chr3:31811720-31814608	OrsajCr114	OrsajCr114	NA	non-coding	non-coding
IRGSP1.0	ONG0400170	Chr4:9089919-9210431	Chr4:9098093-9100981	OrsajCr114	OrsajCr114	NA	non-coding	non-coding
IRGSP1.0	ONG0400170	Chr4:9089919-9210431	Chr4:9206368-9209255	OrsajCr114	OrsajCr114	NA	non-coding	non-coding
IRGSP1.0	ONG1000480	Chr10:20451714-20484688	Chr10:20457305-20460196	OrsajCr114	OrsajCr114	NA	non-coding	non-coding
IRGSP1.0	ONG1000180	Chr10:10790062-10920944	Chr10:10902290-10905178	OrsajCr114	OrsajCr114	NA	non-coding	non-coding
IRGSP1.0	ONG0800260	Chr8:9242935-9284593	Chr8:9245589-9248477	OrsajCr114	OrsajCr114	NA	non-coding	non-coding
IRGSP1.0	ONG1200160	Chr12:5608911-5658338	Chr12:5633759-5633854	OrsajCr115	OrsajCr115	NA	non-coding	non-coding
IRGSP1.0	ONG1000180	Chr10:10790062-10920944	Chr10:10905273-10905368	OrsajCr115	OrsajCr115	NA	non-coding	non-coding
IRGSP1.0	ONG1000480	Chr10:20451714-20484688	Chr10:20460291-20460386	OrsajCr115	OrsajCr115	NA	non-coding	non-coding
IRGSP1.0	ONG0800260	Chr8:9242935-9284593	Chr8:9245399-9245494	OrsajCr115	OrsajCr115	NA	non-coding	non-coding
IRGSP1.0	ONG0400170	Chr4:9089919-9210431	Chr4:9101076-9101171	OrsajCr115	OrsajCr115	NA	non-coding	non-coding
IRGSP1.0	ONG0400170	Chr4:9089919-9210431	Chr4:9209350-9209445	OrsajCr115	OrsajCr115	NA	non-coding	non-coding
IRGSP1.0	ONG0300260	Chr3:14032598-14034837	Chr3:14034690-14034785	OrsajCr115	OrsajCr115	NA	non-coding	non-coding
IRGSP1.0	ONG0300820	Chr3:31809345-31821856	Chr3:31814703-31814798	OrsajCr115	OrsajCr115	NA	non-coding	non-coding
IRGSP1.0	ONG0300820	Chr3:31809345-31821856	Chr3:31815835-31815930	OrsajCr115	OrsajCr115	NA	non-coding	non-coding
IRGSP1.0	ONG0100890	Chr1:33497812-33589786	Chr1:33588384-33588479	OrsajCr115	OrsajCr115	NA	non-coding	non-coding
IRGSP1.0	ONG0200010	Chr2:807669-818565	Chr2:815764-815859	OrsajCr115	OrsajCr115	NA	non-coding	non-coding
IRGSP1.0	ONG1200160	Chr12:5608911-5658338	Chr12:5633411-5633532	OrsajCr116	OrsajCr116	NA	non-coding	non-coding
IRGSP1.0	ONG1000180	Chr10:10790062-10920944	Chr10:10905595-10905716	OrsajCr116	OrsajCr116	NA	non-coding	non-coding
IRGSP1.0	ONG1000480	Chr10:20451714-20484688	Chr10:20460613-20460734	OrsajCr116	OrsajCr116	NA	non-coding	non-coding
IRGSP1.0	ONG0800260	Chr8:9242935-9284593	Chr8:9245051-9245172	OrsajCr116	OrsajCr116	NA	non-coding	non-coding
IRGSP1.0	ONG0400170	Chr4:9089919-9210431	Chr4:9101398-9101519	OrsajCr116	OrsajCr116	NA	non-coding	non-coding
IRGSP1.0	ONG0400170	Chr4:9089919-9210431	Chr4:9209672-9209793	OrsajCr116	OrsajCr116	NA	non-coding	non-coding
IRGSP1.0	ONG0300260	Chr3:14032598-14034837	Chr3:14034342-14034463	OrsajCr116	OrsajCr116	NA	non-coding	non-coding
IRGSP1.0	ONG0300820	Chr3:31809345-31821856	Chr3:31815025-31815146	OrsajCr116	OrsajCr116	NA	non-coding	non-coding
IRGSP1.0	ONG0300820	Chr3:31809345-31821856	Chr3:31816157-31816278	OrsajCr116	OrsajCr116	NA	non-coding	non-coding
IRGSP1.0	ONG0300150	Chr3:7956146-7956644	Chr3:7956240-7956360	OrsajCr116	OrsajCr116	NA	non-coding	non-coding
IRGSP1.0	ONG0200010	Chr2:807669-818565	Chr2:816087-816208	OrsajCr116	OrsajCr116	NA	non-coding	non-coding
IRGSP1.0	ONG0100890	Chr1:33497812-33589786	Chr1:33588706-33588827	OrsajCr116	OrsajCr116	NA	non-coding	non-coding
IRGSP1.0	ONG1000180	Chr10:10790062-10920944	Chr10:10905974-10906048	OrsajCt151	OrsajCt151	NA	non-coding	non-coding
IRGSP1.0	ONG1000480	Chr10:20451714-20484688	Chr10:20460991-20461065	OrsajCt151	OrsajCt151	NA	non-coding	non-coding
IRGSP1.0	ONG0800260	Chr8:9242935-9284593	Chr8:9244719-9244793	OrsajCt151	OrsajCt151	NA	non-coding	non-coding
IRGSP1.0	ONG0400170	Chr4:9089919-9210431	Chr4:9101777-9101851	OrsajCt151	OrsajCt151	NA	non-coding	non-coding
IRGSP1.0	ONG0400170	Chr4:9089919-9210431	Chr4:9210051-9210125	OrsajCt151	OrsajCt151	NA	non-coding	non-coding
IRGSP1.0	ONG0300260	Chr3:14032598-14034837	Chr3:14034012-14034086	OrsajCt151	OrsajCt151	NA	non-coding	non-coding
IRGSP1.0	ONG0300820	Chr3:31809345-31821856	Chr3:31816536-31816610	OrsajCt151	OrsajCt151	NA	non-coding	non-coding
IRGSP1.0	ONG0100890	Chr1:33497812-33589786	Chr1:33589085-33589159	OrsajCt151	OrsajCt151	NA	non-coding	non-coding
IRGSP1.0	ONG1200160	Chr12:5608911-5658338	Chr12:5633079-5633153	OrsajCt151	OrsajCt151	NA	non-coding	non-coding
IRGSP1.0	ONG0700470	Chr7:19282265-19282358	Chr7:19282265-19282340	OrsajCt151	OrsajCt151	NA	non-coding	non-coding
IRGSP1.0	ONG0200010	Chr2:807669-818565	Chr2:816464-816538	OrsajCt151	OrsajCt151	NA	non-coding	non-coding
IRGSP1.0	ONG1200160	Chr12:5608911-5658338	Chr12:5615979-5616051	OrsajCp081	ORF23	NA	coding	possible functionality
IRGSP1.0	ONG1200160	Chr12:5608911-5658338	Chr12:5632955-5633027	OrsajCp081	ORF23	NA	coding	possible functionality
IRGSP1.0	ONG1000180	Chr10:10790062-10920944	Chr10:10906100-10906172	OrsajCp081	ORF23	NA	coding	possible functionality
IRGSP1.0	ONG1000480	Chr10:20451714-20484688	Chr10:20461117-20461189	OrsajCp081	ORF23	NA	coding	possible functionality
IRGSP1.0	ONG0800260	Chr8:9242935-9284593	Chr8:9244595-9244667	OrsajCp081	ORF23	NA	coding	possible functionality
IRGSP1.0	ONG0400170	Chr4:9089919-9210431	Chr4:9101903-9101975	OrsajCp081	ORF23	NA	coding	possible functionality
IRGSP1.0	ONG0400170	Chr4:9089919-9210431	Chr4:9210177-9210249	OrsajCp081	ORF23	NA	coding	possible functionality
IRGSP1.0	ONG0300260	Chr3:14032598-14034837	Chr3:14033888-14033960	OrsajCp081	ORF23	NA	coding	possible functionality
IRGSP1.0	ONG0300820	Chr3:31809345-31821856	Chr3:31816662-31816734	OrsajCp081	ORF23	NA	coding	possible functionality
IRGSP1.0	ONG0200010	Chr2:807669-818565	Chr2:816590-816662	OrsajCp081	ORF23	NA	coding	possible functionality
IRGSP1.0	ONG0100890	Chr1:33497812-33589786	Chr1:33589211-33589283	OrsajCp081	ORF23	NA	coding	possible functionality
IRGSP1.0	ONG1200160	Chr12:5608911-5658338	Chr12:5632755-5632827	OrsajCt152	OrsajCt152	NA	non-coding	non-coding
IRGSP1.0	ONG1200740	Chr12:20452151-20705637	Chr12:20528409-20528481	OrsajCt152	OrsajCt152	NA	non-coding	non-coding
IRGSP1.0	ONG1200160	Chr12:5608911-5658338	Chr12:5616179-5616251	OrsajCt152	OrsajCt152	NA	non-coding	non-coding
IRGSP1.0	ONG1000180	Chr10:10790062-10920944	Chr10:10906300-10906372	OrsajCt152	OrsajCt152	NA	non-coding	non-coding
IRGSP1.0	ONG1000480	Chr10:20451714-20484688	Chr10:20461317-20461389	OrsajCt152	OrsajCt152	NA	non-coding	non-coding
IRGSP1.0	ONG0800260	Chr8:9242935-9284593	Chr8:9244395-9244467	OrsajCt152	OrsajCt152	NA	non-coding	non-coding
IRGSP1.0	ONG0400170	Chr4:9089919-9210431	Chr4:9102103-9102175	OrsajCt152	OrsajCt152	NA	non-coding	non-coding
IRGSP1.0	ONG0400650	Chr4:23636684-23660553	Chr4:23640192-23640264	OrsajCt152	OrsajCt152	NA	non-coding	non-coding
IRGSP1.0	ONG0300260	Chr3:14032598-14034837	Chr3:14033688-14033760	OrsajCt152	OrsajCt152	NA	non-coding	non-coding
IRGSP1.0	ONG0300820	Chr3:31809345-31821856	Chr3:31816862-31816934	OrsajCt152	OrsajCt152	NA	non-coding	non-coding
IRGSP1.0	ONG0100500	Chr1:18677560-18689953	Chr1:18689347-18689419	OrsajCt152	OrsajCt152	NA	non-coding	non-coding
IRGSP1.0	ONG0100890	Chr1:33497812-33589786	Chr1:33589411-33589483	OrsajCt152	OrsajCt152	NA	non-coding	non-coding
IRGSP1.0	ONG0200010	Chr2:807669-818565	Chr2:816790-816862	OrsajCt152	OrsajCt152	NA	non-coding	non-coding
IRGSP1.0	ONG1200560	Chr12:20925176-20929627	Chr12:20929294-20929486	OrsajCp082	ORF63	NA	coding	possible functionality
IRGSP1.0	ONG1200160	Chr12:5608911-5658338	Chr12:5617170-5617362	OrsajCp082	ORF63	NA	coding	truncated
IRGSP1.0	ONG1200160	Chr12:5608911-5658338	Chr12:5631646-5631839	OrsajCp082	ORF63	NA	coding	truncated
IRGSP1.0	ONG1000180	Chr10:10790062-10920944	Chr10:10907291-10907483	OrsajCp082	ORF63	NA	coding	possible functionality
IRGSP1.0	ONG1000480	Chr10:20451714-20484688	Chr10:20462308-20462499	OrsajCp082	ORF63	NA	coding	truncated
IRGSP1.0	ONG0400170	Chr4:9089919-9210431	Chr4:9103094-9103286	OrsajCp082	ORF63	NA	coding	possible functionality
IRGSP1.0	ONG0400650	Chr4:23636684-23660553	Chr4:23639081-23639273	OrsajCp082	ORF63	NA	coding	truncated
IRGSP1.0	ONG0200010	Chr2:807669-818565	Chr2:817781-817973	OrsajCp082	ORF63	NA	coding	possible functionality
IRGSP1.0	ONG0300260	Chr3:14032598-14034837	Chr3:14032598-14032782	OrsajCp082	ORF63	NA	coding	truncated
IRGSP1.0	ONG0400170	Chr4:9089919-9210431	Chr4:9103706-9103979	OrsajCp083	RPS15	NA	coding	possible functionality
IRGSP1.0	ONG0400650	Chr4:23636684-23660553	Chr4:23638387-23638661	OrsajCp083	RPS15	NA	coding	truncated
IRGSP1.0	ONG1200560	Chr12:20925176-20929627	Chr12:20928601-20928874	OrsajCp083	RPS15	NA	coding	truncated
IRGSP1.0	ONG1200160	Chr12:5608911-5658338	Chr12:5617782-5618055	OrsajCp083	RPS15	NA	coding	possible functionality
IRGSP1.0	ONG1200160	Chr12:5608911-5658338	Chr12:5630959-5631226	OrsajCp083	RPS15	NA	coding	truncated
IRGSP1.0	ONG1000180	Chr10:10790062-10920944	Chr10:10907903-10908176	OrsajCp083	RPS15	NA	coding	truncated
IRGSP1.0	ONG1200560	Chr12:20925176-20929627	Chr12:20928292-20928463	OrsajCp084	ORF56	NA	coding	possible functionality
IRGSP1.0	ONG1200160	Chr12:5608911-5658338	Chr12:5618182-5618354	OrsajCp084	ORF56	NA	coding	truncated
IRGSP1.0	ONG1200160	Chr12:5608911-5658338	Chr12:5630658-5630821	OrsajCp084	ORF56	NA	coding	truncated
IRGSP1.0	ONG1000180	Chr10:10790062-10920944	Chr10:10908314-10908477	OrsajCp084	ORF56	NA	coding	truncated
IRGSP1.0	ONG0400170	Chr4:9089919-9210431	Chr4:9104118-9104281	OrsajCp084	ORF56	NA	coding	truncated
IRGSP1.0	ONG0400650	Chr4:23636684-23660553	Chr4:23638086-23638249	OrsajCp084	ORF56	NA	coding	truncated
IRGSP1.0	ONG1000180	Chr10:10790062-10920944	Chr10:10918584-10920789	OrsajCp085	ndhF	NA	coding	possible functionality
IRGSP1.0	ONG1200560	Chr12:20925176-20929627	Chr12:20926054-20928259	OrsajCp085	ndhF	NA	coding	truncated
IRGSP1.0	ONG1200160	Chr12:5608911-5658338	Chr12:5618387-5620593	OrsajCp085	ndhF	NA	coding	truncated
IRGSP1.0	ONG1200160	Chr12:5608911-5658338	Chr12:5621282-5621478	OrsajCp086	RPL32	NA	coding	truncated
IRGSP1.0	ONG1000180	Chr10:10790062-10920944	Chr10:10917671-10917867	OrsajCp086	RPL32	NA	coding	truncated
IRGSP1.0	ONG0300530	Chr3:25246070-25249977	Chr3:25248015-25248212	OrsajCp086	RPL32	NA	coding	truncated
IRGSP1.0	ONG1000180	Chr10:10790062-10920944	Chr10:10917061-10917141	OrsajCt153	OrsajCt153	NA	non-coding	non-coding
IRGSP1.0	ONG0600710	Chr6:28180108-28184315	Chr6:28180366-28180446	OrsajCt153	OrsajCt153	NA	non-coding	non-coding
IRGSP1.0	ONG0300530	Chr3:25246070-25249977	Chr3:25247405-25247485	OrsajCt153	OrsajCt153	NA	non-coding	non-coding
IRGSP1.0	ONG1200160	Chr12:5608911-5658338	Chr12:5622008-5622088	OrsajCt153	OrsajCt153	NA	non-coding	non-coding
IRGSP1.0	ONG0600710	Chr6:28180108-28184315	Chr6:28180528-28181494	OrsajCp087	ccsA	NA	coding	possible functionality
IRGSP1.0	ONG1000180	Chr10:10790062-10920944	Chr10:10916013-10916979	OrsajCp087	ccsA	NA	coding	truncated
IRGSP1.0	ONG1200160	Chr12:5608911-5658338	Chr12:5622170-5623136	OrsajCp087	ccsA	NA	coding	possible functionality
IRGSP1.0	ONG0300530	Chr3:25246070-25249977	Chr3:25246369-25247323	OrsajCp087	ccsA	NA	coding	truncated
IRGSP1.0	ONG0600710	Chr6:28180108-28184315	Chr6:28181690-28183193	OrsajCp088	ndhD	NA	coding	possible functionality
IRGSP1.0	ONG1000180	Chr10:10790062-10920944	Chr10:10914310-10915817	OrsajCp088	ndhD	NA	coding	truncated
IRGSP1.0	ONG0700280	Chr7:12658988-12663072	Chr7:12660986-12662492	OrsajCp088	ndhD	NA	coding	possible functionality
IRGSP1.0	ONG1200160	Chr12:5608911-5658338	Chr12:5623332-5624839	OrsajCp088	ndhD	NA	coding	truncated
IRGSP1.0	ONG1000180	Chr10:10790062-10920944	Chr10:10913945-10914191	OrsajCp089	psaC	NA	coding	possible functionality
IRGSP1.0	ONG0700280	Chr7:12658988-12663072	Chr7:12660621-12660867	OrsajCp089	psaC	NA	coding	possible functionality
IRGSP1.0	ONG0600710	Chr6:28180108-28184315	Chr6:28183312-28183558	OrsajCp089	psaC	NA	coding	possible functionality
IRGSP1.0	ONG1200160	Chr12:5608911-5658338	Chr12:5624958-5625204	OrsajCp089	psaC	NA	coding	truncated
IRGSP1.0	ONG0900470	Chr9:18719838-18720236	Chr9:18719899-18720145	OrsajCp089	psaC	NA	coding	possible functionality
IRGSP1.0	ONG1000180	Chr10:10790062-10920944	Chr10:10913193-10913499	OrsajCp090	ndhE	NA	coding	possible functionality
IRGSP1.0	ONG0700280	Chr7:12658988-12663072	Chr7:12659869-12660175	OrsajCp090	ndhE	NA	coding	possible functionality
IRGSP1.0	ONG0600710	Chr6:28180108-28184315	Chr6:28184004-28184310	OrsajCp090	ndhE	NA	coding	possible functionality
IRGSP1.0	ONG1200160	Chr12:5608911-5658338	Chr12:5625636-5625942	OrsajCp090	ndhE	NA	coding	possible functionality
IRGSP1.0	ONG1200320	Chr12:11087194-11090155	Chr12:11089406-11089937	OrsajCp091	ndhG	NA	coding	possible functionality
IRGSP1.0	ONG1200160	Chr12:5608911-5658338	Chr12:5626151-5626682	OrsajCp091	ndhG	NA	coding	possible functionality
IRGSP1.0	ONG0200320	Chr2:14239661-14289647	Chr2:14240034-14240565	OrsajCp091	ndhG	NA	coding	possible functionality
IRGSP1.0	ONG0200320	Chr2:14239661-14289647	Chr2:14250735-14251266	OrsajCp091	ndhG	NA	coding	possible functionality
IRGSP1.0	ONG1000180	Chr10:10790062-10920944	Chr10:10912453-10912984	OrsajCp091	ndhG	NA	coding	possible functionality
IRGSP1.0	ONG0700280	Chr7:12658988-12663072	Chr7:12659141-12659660	OrsajCp091	ndhG	NA	coding	possible functionality
IRGSP1.0	ONG1200320	Chr12:11087194-11090155	Chr12:11088621-11089164	OrsajCp092	ndhI	NA	coding	possible functionality
IRGSP1.0	ONG1200160	Chr12:5608911-5658338	Chr12:5626924-5627467	OrsajCp092	ndhI	NA	coding	possible functionality
IRGSP1.0	ONG1000180	Chr10:10790062-10920944	Chr10:10911668-10912211	OrsajCp092	ndhI	NA	coding	possible functionality
IRGSP1.0	ONG0200320	Chr2:14239661-14289647	Chr2:14251508-14252051	OrsajCp092	ndhI	NA	coding	possible functionality
IRGSP1.0	ONG1000180	Chr10:10790062-10920944	Chr10:10909497-10911574	OrsajCp093	ndhA	NA	coding	truncated
IRGSP1.0	ONG0200320	Chr2:14239661-14289647	Chr2:14252145-14254221	OrsajCp093	ndhA	NA	coding	truncated
IRGSP1.0	ONG0200280	Chr2:13297305-13300555	Chr2:13297490-13299566	OrsajCp093	ndhA	NA	coding	truncated
IRGSP1.0	ONG1200160	Chr12:5608911-5658338	Chr12:5627561-5629639	OrsajCp093	ndhA	NA	coding	truncated
IRGSP1.0	ONG0400170	Chr4:9089919-9210431	Chr4:9104118-9105300	OrsajCp094	ndhH	NA	coding	possible functionality
IRGSP1.0	ONG0400650	Chr4:23636684-23660553	Chr4:23637069-23638249	OrsajCp094	ndhH	NA	coding	truncated
IRGSP1.0	ONG1000180	Chr10:10790062-10920944	Chr10:10908314-10909496	OrsajCp094	ndhH	NA	coding	possible functionality
IRGSP1.0	ONG1200160	Chr12:5608911-5658338	Chr12:5629640-5630821	OrsajCp094	ndhH	NA	coding	truncated
IRGSP1.0	ONG1200760	Chr12:8526779-8561586	Chr12:8540678-8541272	OrsajM_p03	ORF25	1 of 9 edited	coding	possible functionality
IRGSP1.0	ONG1200760	Chr12:8526779-8561586	Chr12:8541996-8542455	OrsajM_p04	ORF152a	NA	coding	truncated
IRGSP1.0	ONG1200760	Chr12:8526779-8561586	Chr12:8530749-8530873	OrsajM_t02	trnV	NA	non-coding	non-coding
IRGSP1.0	ONG1200750	Chr12:13342090-13419800	Chr12:13400106-13400230	OrsajM_t02	trnV	NA	non-coding	non-coding
IRGSP1.0	ONG1200770	Chr12:13342090-13419800	Chr12:13400106-13400230	OrsajM_t02	trnV	NA	non-coding	non-coding
IRGSP1.0	ONG1200160	Chr12:5608911-5658338	Chr12:5610622-5610746	OrsajM_t02	trnV	NA	non-coding	non-coding
IRGSP1.0	ONG1200340	Chr12:11282791-11289656	Chr12:11287730-11287854	OrsajM_t02	trnV	NA	non-coding	non-coding
IRGSP1.0	ONG1000480	Chr10:20451714-20484688	Chr10:20463064-20463188	OrsajM_t02	trnV	NA	non-coding	non-coding
IRGSP1.0	ONG1000180	Chr10:10790062-10920944	Chr10:10857689-10857813	OrsajM_t02	trnV	NA	non-coding	non-coding
IRGSP1.0	ONG0602940	Chr6:23563358-23592835	Chr6:23592036-23592160	OrsajM_t02	trnV	NA	non-coding	non-coding
IRGSP1.0	ONG0600260	Chr6:12744715-12747935	Chr6:12745265-12745389	OrsajM_t02	trnV	NA	non-coding	non-coding
IRGSP1.0	ONG0300820	Chr3:31809345-31821856	Chr3:31818886-31819010	OrsajM_t02	trnV	NA	non-coding	non-coding
IRGSP1.0	ONG1200760	Chr12:8526779-8561586	Chr12:8530196-8530269	OrsajM_t03	trnM	NA	non-coding	non-coding
IRGSP1.0	ONG1200340	Chr12:11282791-11289656	Chr12:11288356-11288429	OrsajM_t03	trnM	NA	non-coding	non-coding
IRGSP1.0	ONG1200160	Chr12:5608911-5658338	Chr12:5611248-5611321	OrsajM_t03	trnM	NA	non-coding	non-coding
IRGSP1.0	ONG1200740	Chr12:20452151-20705637	Chr12:20539781-20539853	OrsajM_t03	trnM	NA	non-coding	non-coding
IRGSP1.0	ONG1000180	Chr10:10790062-10920944	Chr10:10858315-10858388	OrsajM_t03	trnM	NA	non-coding	non-coding
IRGSP1.0	ONG0602940	Chr6:23563358-23592835	Chr6:23591461-23591534	OrsajM_t03	trnM	NA	non-coding	non-coding
IRGSP1.0	ONG0600020	Chr6:1095046-1107974	Chr6:1095286-1095359	OrsajM_t03	trnM	NA	non-coding	non-coding
IRGSP1.0	ONG0300820	Chr3:31809345-31821856	Chr3:31819512-31819585	OrsajM_t03	trnM	NA	non-coding	non-coding
IRGSP1.0	ONG0100890	Chr1:33497812-33589786	Chr1:33539756-33539829	OrsajM_t03	trnM	NA	non-coding	non-coding
IRGSP1.0	ONG1100300	Chr11:10857746-10859134	Chr11:10857947-10858020	OrsajM_t03	trnM	NA	non-coding	non-coding
IRGSP1.0	ONG0900310	Chr9:11945700-11951058	Chr9:11946524-11946598	OrsajM_t04	trnH	NA	non-coding	non-coding
IRGSP1.0	ONG0900360	Chr9:14505285-14510719	Chr9:14507214-14507288	OrsajM_t04	trnH	NA	non-coding	non-coding
IRGSP1.0	ONG0800260	Chr8:9242935-9284593	Chr8:9262277-9262351	OrsajM_t04	trnH	NA	non-coding	non-coding
IRGSP1.0	ONG0800690	Chr8:22322551-22327776	Chr8:22326188-22326262	OrsajM_t04	trnH	NA	non-coding	non-coding
IRGSP1.0	ONG0700310	Chr7:14230357-14244746	Chr7:14244214-14244288	OrsajM_t04	trnH	NA	non-coding	non-coding
IRGSP1.0	ONG0400170	Chr4:9089919-9210431	Chr4:9137778-9137852	OrsajM_t04	trnH	NA	non-coding	non-coding
IRGSP1.0	ONG0400170	Chr4:9089919-9210431	Chr4:9153722-9153796	OrsajM_t04	trnH	NA	non-coding	non-coding
IRGSP1.0	ONG0400650	Chr4:23636684-23660553	Chr4:23654557-23654631	OrsajM_t04	trnH	NA	non-coding	non-coding
IRGSP1.0	ONG1200350	Chr12:11409052-11414526	Chr12:11413548-11413622	OrsajM_t04	trnH	NA	non-coding	non-coding
IRGSP1.0	ONG1000180	Chr10:10790062-10920944	Chr10:10806663-10806737	OrsajM_t04	trnH	NA	non-coding	non-coding
IRGSP1.0	ONG1000180	Chr10:10790062-10920944	Chr10:10888145-10888219	OrsajM_t04	trnH	NA	non-coding	non-coding
IRGSP1.0	ONG1000500	Chr10:21334663-21337365	Chr10:21336224-21336298	OrsajM_t04	trnH	NA	non-coding	non-coding
IRGSP1.0	ONG0300230	Chr3:13640562-13649805	Chr3:13645537-13645611	OrsajM_t04	trnH	NA	non-coding	non-coding
IRGSP1.0	ONG1100060	Chr11:3500264-3500373	Chr11:3500291-3500364	OrsajM_t04	trnH	NA	non-coding	non-coding
IRGSP1.0	ONG1200160	Chr12:5608911-5658338	Chr12:5641488-5641562	OrsajM_t05	trnP	NA	non-coding	non-coding
IRGSP1.0	ONG1000180	Chr10:10790062-10920944	Chr10:10871336-10871410	OrsajM_t05	trnP	NA	non-coding	non-coding
IRGSP1.0	ONG0800260	Chr8:9242935-9284593	Chr8:9279093-9279167	OrsajM_t05	trnP	NA	non-coding	non-coding
IRGSP1.0	ONG0602940	Chr6:23563358-23592835	Chr6:23578456-23578530	OrsajM_t05	trnP	NA	non-coding	non-coding
IRGSP1.0	ONG1000180	Chr10:10790062-10920944	Chr10:10871136-10871210	OrsajM_t06	trnW	NA	non-coding	non-coding
IRGSP1.0	ONG0800260	Chr8:9242935-9284593	Chr8:9279293-9279367	OrsajM_t06	trnW	NA	non-coding	non-coding
IRGSP1.0	ONG0602940	Chr6:23563358-23592835	Chr6:23578656-23578730	OrsajM_t06	trnW	NA	non-coding	non-coding
IRGSP1.0	ONG0100530	Chr1:18995679-18997888	Chr1:18997469-18997543	OrsajM_t06	trnW	NA	non-coding	non-coding
IRGSP1.0	ONG1200740	Chr12:20452151-20705637	Chr12:20550048-20550120	OrsajM_t07	trnQ	NA	non-coding	non-coding
IRGSP1.0	ONG1200740	Chr12:20452151-20705637	Chr12:20554942-20555014	OrsajM_t07	trnQ	NA	non-coding	non-coding
IRGSP1.0	ONG0600250	Chr6:12505797-12537132	Chr6:12509687-12509759	OrsajM_t07	trnQ	NA	non-coding	non-coding
IRGSP1.0	ONG1200740	Chr12:20452151-20705637	Chr12:20548244-20548691	OrsajM_p06	RPS7	NA	coding	possible functionality
IRGSP1.0	ONG0600250	Chr6:12505797-12537132	Chr6:12511116-12511564	OrsajM_p06	RPS7	NA	coding	truncated
IRGSP1.0	ONG1200740	Chr12:20452151-20705637	Chr12:20546101-20547574	OrsajM_p07	ORF490	NA	coding	possible functionality
IRGSP1.0	ONG0600250	Chr6:12505797-12537132	Chr6:12512232-12513705	OrsajM_p07	ORF490	NA	coding	truncated
IRGSP1.0	ONG1200740	Chr12:20452151-20705637	Chr12:20545120-20545898	OrsajM_p08	ORF258	NA	coding	truncated
IRGSP1.0	ONG0600250	Chr6:12505797-12537132	Chr6:12513907-12514685	OrsajM_p08	ORF258	NA	coding	truncated
IRGSP1.0	ONG1200740	Chr12:20452151-20705637	Chr12:20540245-20540713	OrsajM_p09	ORFB	NA	coding	possible functionality
IRGSP1.0	ONG1200740	Chr12:20452151-20705637	Chr12:20539780-20539853	OrsajM_t08	trnM	NA	non-coding	non-coding
IRGSP1.0	ONG1200760	Chr12:8526779-8561586	Chr12:8530196-8530268	OrsajM_t08	trnM	NA	non-coding	non-coding
IRGSP1.0	ONG1200340	Chr12:11282791-11289656	Chr12:11288357-11288429	OrsajM_t08	trnM	NA	non-coding	non-coding
IRGSP1.0	ONG1200160	Chr12:5608911-5658338	Chr12:5611249-5611321	OrsajM_t08	trnM	NA	non-coding	non-coding
IRGSP1.0	ONG1000180	Chr10:10790062-10920944	Chr10:10858316-10858388	OrsajM_t08	trnM	NA	non-coding	non-coding
IRGSP1.0	ONG0602940	Chr6:23563358-23592835	Chr6:23591461-23591533	OrsajM_t08	trnM	NA	non-coding	non-coding
IRGSP1.0	ONG0600020	Chr6:1095046-1107974	Chr6:1095287-1095359	OrsajM_t08	trnM	NA	non-coding	non-coding
IRGSP1.0	ONG0300820	Chr3:31809345-31821856	Chr3:31819513-31819585	OrsajM_t08	trnM	NA	non-coding	non-coding
IRGSP1.0	ONG0100890	Chr1:33497812-33589786	Chr1:33539757-33539829	OrsajM_t08	trnM	NA	non-coding	non-coding
IRGSP1.0	ONG1100300	Chr11:10857746-10859134	Chr11:10857948-10858020	OrsajM_t08	trnM	NA	non-coding	non-coding
IRGSP1.0	ONG1200740	Chr12:20452151-20705637	Chr12:20537711-20538257	OrsajM_p10	ORF181	NA	coding	possible functionality
IRGSP1.0	ONG0900050	Chr9:1529739-1532271	Chr9:1530461-1531007	OrsajM_p10	ORF181	NA	coding	possible functionality
IRGSP1.0	ONG1200740	Chr12:20452151-20705637	Chr12:20534000-20534618	OrsajM_p11	nad6	4 of 18 edited	coding	possible functionality
IRGSP1.0	ONG1200740	Chr12:20452151-20705637	Chr12:20533763-20533793	OrsajM_t09	trnI	NA	non-coding	non-coding
IRGSP1.0	ONG1200740	Chr12:20452151-20705637	Chr12:20533004-20533727	OrsajM_p12	ccmC	NA	coding	possible functionality
IRGSP1.0	ONG1200740	Chr12:20452151-20705637	Chr12:20532218-20532770	OrsajM_p13	ORF183	NA	coding	possible functionality
IRGSP1.0	ONG1200740	Chr12:20452151-20705637	Chr12:20529980-20530054	OrsajM_t10	trnI	NA	non-coding	non-coding
IRGSP1.0	ONG1200740	Chr12:20452151-20705637	Chr12:20529181-20529255	OrsajM_t11	trnD	NA	non-coding	non-coding
IRGSP1.0	ONG1200740	Chr12:20452151-20705637	Chr12:20528911-20528983	OrsajM_t12	trnN	NA	non-coding	non-coding
IRGSP1.0	ONG1200740	Chr12:20452151-20705637	Chr12:20524748-20524821	OrsajM_t13	trnK	NA	non-coding	non-coding
IRGSP1.0	ONG1200740	Chr12:20452151-20705637	Chr12:20515024-20515834	OrsajM_p14	ORFX	NA	coding	possible functionality
IRGSP1.0	ONG1200740	Chr12:20452151-20705637	Chr12:20503265-20509254	OrsajM_p15	nad7	NA	coding	truncated
IRGSP1.0	ONG1200740	Chr12:20452151-20705637	Chr12:20673559-20674144	OrsajM_p17	ORF194	NA	coding	possible functionality
IRGSP1.0	ONG1200740	Chr12:20452151-20705637	Chr12:20575895-20576480	OrsajM_p17	ORF194	NA	coding	possible functionality
IRGSP1.0	ONG1200740	Chr12:20452151-20705637	Chr12:20578347-20581812	OrsajM_p18	RPS3	NA	coding	truncated
IRGSP1.0	ONG1200740	Chr12:20452151-20705637	Chr12:20675868-20679333	OrsajM_p18	RPS3	NA	coding	truncated
IRGSP1.0	ONG1200740	Chr12:20452151-20705637	Chr12:20679181-20679739	OrsajM_p19	RPL16	NA	coding	possible functionality
IRGSP1.0	ONG1200740	Chr12:20452151-20705637	Chr12:20581660-20582218	OrsajM_p19	RPL16	NA	coding	possible functionality
IRGSP1.0	ONG1200740	Chr12:20452151-20705637	Chr12:20452979-20453447	OrsajM_p20	nad3	NA	coding	possible functionality
IRGSP1.0	ONG1200740	Chr12:20452151-20705637	Chr12:20582915-20583383	OrsajM_p20	nad3	NA	coding	possible functionality
IRGSP1.0	ONG1200740	Chr12:20452151-20705637	Chr12:20453491-20453869	OrsajM_p21	RPS12	NA	coding	possible functionality
IRGSP1.0	ONG1200740	Chr12:20452151-20705637	Chr12:20583427-20583805	OrsajM_p21	RPS12	NA	coding	possible functionality
IRGSP1.0	ONG1200740	Chr12:20452151-20705637	Chr12:20691684-20692062	OrsajM_p21	RPS12	NA	coding	possible functionality
IRGSP1.0	ONG1200740	Chr12:20452151-20705637	Chr12:20477393-20478068	OrsajM_p22	ORF224	NA	coding	possible functionality
IRGSP1.0	ONG1200740	Chr12:20452151-20705637	Chr12:20588865-20589540	OrsajM_p22	ORF224	NA	coding	possible functionality
IRGSP1.0	ONG1200740	Chr12:20452151-20705637	Chr12:20697122-20697797	OrsajM_p22	ORF224	NA	coding	possible functionality
IRGSP1.0	ONG1200740	Chr12:20452151-20705637	Chr12:20458929-20459603	OrsajM_p22	ORF224	NA	coding	truncated
IRGSP1.0	ONG1200740	Chr12:20452151-20705637	Chr12:20603781-20605233	OrsajM_p23	RPS2	NA	coding	possible functionality
IRGSP1.0	ONG1200740	Chr12:20452151-20705637	Chr12:20699955-20701405	OrsajM_p23	RPS2	NA	coding	truncated
IRGSP1.0	ONG1200740	Chr12:20452151-20705637	Chr12:20480226-20481675	OrsajM_p23	RPS2	NA	coding	possible functionality
IRGSP1.0	ONG1200740	Chr12:20452151-20705637	Chr12:20484581-20484655	OrsajM_t14	trnfM	NA	non-coding	non-coding
IRGSP1.0	ONG1200740	Chr12:20452151-20705637	Chr12:20608139-20608213	OrsajM_t14	trnfM	NA	non-coding	non-coding
IRGSP1.0	ONG1200740	Chr12:20452151-20705637	Chr12:20704311-20704385	OrsajM_t14	trnfM	NA	non-coding	non-coding
IRGSP1.0	ONG1200740	Chr12:20452151-20705637	Chr12:20630234-20630720	OrsajM_p26	ORF161	NA	coding	possible functionality
IRGSP1.0	ONG1200760	Chr12:8526779-8561586	Chr12:8555671-8556153	OrsajM_p26	ORF161	NA	coding	truncated
IRGSP1.0	ONG1200740	Chr12:20452151-20705637	Chr12:20635379-20635838	OrsajM_p27	ORF152b	NA	coding	possible functionality
IRGSP1.0	ONG0900550	Chr9:4673689-4732633	Chr9:4677250-4677709	OrsajM_p27	ORF152b	NA	coding	possible functionality
IRGSP1.0	ONG1200740	Chr12:20452151-20705637	Chr12:20637186-20637750	OrsajM_p28	ORF187	NA	coding	possible functionality
IRGSP1.0	ONG0900550	Chr9:4673689-4732633	Chr9:4675338-4675902	OrsajM_p28	ORF187	NA	coding	truncated
IRGSP1.0	ONG0400870	Chr4:32872677-32929972	Chr4:32897173-32897737	OrsajM_p28	ORF187	NA	coding	possible functionality
IRGSP1.0	ONG0300470	Chr3:23658379-23662585	Chr3:23661025-23661587	OrsajM_p28	ORF187	NA	coding	truncated
IRGSP1.0	ONG0100890	Chr1:33497812-33589786	Chr1:33549434-33550439	OrsajM_p29	atp6	NA	coding	truncated
IRGSP1.0	ONG1200760	Chr12:8526779-8561586	Chr12:8538063-8538594	OrsajM_p34	ORF176	NA	coding	possible functionality
IRGSP1.0	ONG1200740	Chr12:20452151-20705637	Chr12:20668401-20668923	OrsajM_p34	ORF176	NA	coding	possible functionality
IRGSP1.0	ONG1200740	Chr12:20452151-20705637	Chr12:20661980-20662067	OrsajM_t15	trnS	NA	non-coding	non-coding
IRGSP1.0	ONG0400870	Chr4:32872677-32929972	Chr4:32879513-32879600	OrsajM_t15	trnS	NA	non-coding	non-coding
IRGSP1.0	ONG1200740	Chr12:20452151-20705637	Chr12:20660319-20660544	OrsajM_p35	atp9	NA	coding	truncated
IRGSP1.0	ONG1200740	Chr12:20452151-20705637	Chr12:20638578-20638700	OrsajM_r01	RRN5	NA	non-coding	non-coding
IRGSP1.0	ONG0400870	Chr4:32872677-32929972	Chr4:32898573-32898695	OrsajM_r01	RRN5	NA	non-coding	non-coding
IRGSP1.0	ONG0300470	Chr3:23658379-23662585	Chr3:23660050-23660172	OrsajM_r01	RRN5	NA	non-coding	non-coding
IRGSP1.0	ONG1200740	Chr12:20452151-20705637	Chr12:20638813-20640508	OrsajM_r02	RRN18	NA	non-coding	non-coding
IRGSP1.0	ONG0600060	Chr6:4069429-4072371	Chr6:4069429-4070124	OrsajM_p39	ORF241	NA	coding	truncated
IRGSP1.0	ONG1200740	Chr12:20452151-20705637	Chr12:20460081-20460169	OrsajM_t16	trnS	NA	non-coding	non-coding
IRGSP1.0	ONG0900550	Chr9:4673689-4732633	Chr9:4697502-4697590	OrsajM_t16	trnS	NA	non-coding	non-coding
IRGSP1.0	ONG1200740	Chr12:20452151-20705637	Chr12:20460428-20460926	OrsajM_p45	ORF165	NA	coding	possible functionality
IRGSP1.0	ONG0900550	Chr9:4673689-4732633	Chr9:4697851-4698349	OrsajM_p45	ORF165	NA	coding	possible functionality
IRGSP1.0	ONG1200740	Chr12:20452151-20705637	Chr12:20460871-20461725	OrsajM_p46	ORF284	NA	coding	truncated
IRGSP1.0	ONG0900550	Chr9:4673689-4732633	Chr9:4698294-4699150	OrsajM_p46	ORF284	NA	coding	truncated
IRGSP1.0	ONG1200740	Chr12:20452151-20705637	Chr12:20461922-20463497	OrsajM_p47	cox1	NA	coding	possible functionality
IRGSP1.0	ONG0900550	Chr9:4673689-4732633	Chr9:4706581-4706858	OrsajM_p48	RPS14	NA	coding	truncated
IRGSP1.0	ONG0900550	Chr9:4673689-4732633	Chr9:4706859-4707426	OrsajM_p49	RPL5	NA	coding	possible functionality
IRGSP1.0	ONG0900550	Chr9:4673689-4732633	Chr9:4728372-4729902	OrsajM_p50	atp1	NA	coding	possible functionality
IRGSP1.0	ONG1000180	Chr10:10790062-10920944	Chr10:10851576-10851663	OrsajM_t17	trnS	NA	non-coding	non-coding
IRGSP1.0	ONG1000480	Chr10:20451714-20484688	Chr10:20469259-20469346	OrsajM_t17	trnS	NA	non-coding	non-coding
IRGSP1.0	ONG0400170	Chr4:9089919-9210431	Chr4:9113317-9113404	OrsajM_t17	trnS	NA	non-coding	non-coding
IRGSP1.0	ONG0400170	Chr4:9089919-9210431	Chr4:9133813-9133900	OrsajM_t17	trnS	NA	non-coding	non-coding
IRGSP1.0	ONG0100890	Chr1:33497812-33589786	Chr1:33517593-33517696	OrsajM_t18	trnF	NA	non-coding	non-coding
IRGSP1.0	ONG0100890	Chr1:33497812-33589786	Chr1:33561875-33561977	OrsajM_t18	trnF	NA	non-coding	non-coding
IRGSP1.0	ONG1200340	Chr12:11282791-11289656	Chr12:11284535-11284637	OrsajM_t18	trnF	NA	non-coding	non-coding
IRGSP1.0	ONG1200750	Chr12:13342090-13419800	Chr12:13350384-13350486	OrsajM_t18	trnF	NA	non-coding	non-coding
IRGSP1.0	ONG1200770	Chr12:13342090-13419800	Chr12:13350384-13350486	OrsajM_t18	trnF	NA	non-coding	non-coding
IRGSP1.0	ONG1000180	Chr10:10790062-10920944	Chr10:10854493-10854595	OrsajM_t18	trnF	NA	non-coding	non-coding
IRGSP1.0	ONG1000480	Chr10:20451714-20484688	Chr10:20466284-20466386	OrsajM_t18	trnF	NA	non-coding	non-coding
IRGSP1.0	ONG0100890	Chr1:33497812-33589786	Chr1:33519939-33520512	OrsajM_p51	nad9	NA	coding	possible functionality
IRGSP1.0	ONG0100890	Chr1:33497812-33589786	Chr1:33521256-33521339	OrsajM_t19	trnY	NA	non-coding	non-coding
IRGSP1.0	ONG0100890	Chr1:33497812-33589786	Chr1:33536327-33536849	OrsajM_p53	ORF173	NA	coding	possible functionality
IRGSP1.0	ONG0300600	Chr3:26522026-26522890	Chr3:26522407-26522890	OrsajM_p53	ORF173	NA	coding	truncated
IRGSP1.0	ONG0100890	Chr1:33497812-33589786	Chr1:33585943-33586432	OrsajM_p54	ORF162	NA	coding	possible functionality
IRGSP1.0	ONG1000180	Chr10:10790062-10920944	Chr10:10825208-10825279	OrsajM_t21	trnC	NA	non-coding	non-coding
IRGSP1.0	ONG1000330	Chr10:16281818-16282333	Chr10:16282013-16282084	OrsajM_t21	trnC	NA	non-coding	non-coding
IRGSP1.0	ONG0400170	Chr4:9089919-9210431	Chr4:9185539-9185610	OrsajM_t21	trnC	NA	non-coding	non-coding
IRGSP1.0	ONG0200320	Chr2:14239661-14289647	Chr2:14278429-14278500	OrsajM_t21	trnC	NA	non-coding	non-coding
IRGSP1.0	ONG0900550	Chr9:4673689-4732633	Chr9:4696571-4697048	OrsajM_p56	ORF160	NA	coding	possible functionality
IRGSP1.0	ONG1000480	Chr10:20451714-20484688	Chr10:20477835-20477907	OrsajM_t22	trnR	NA	non-coding	non-coding
IRGSP1.0	ONG1000180	Chr10:10790062-10920944	Chr10:10843014-10843084	OrsajM_t22	trnR	NA	non-coding	non-coding
IRGSP1.0	ONG0900550	Chr9:4673689-4732633	Chr9:4691982-4692054	OrsajM_t22	trnR	NA	non-coding	non-coding
IRGSP1.0	ONG0400170	Chr4:9089919-9210431	Chr4:9125257-9125329	OrsajM_t22	trnR	NA	non-coding	non-coding
IRGSP1.0	ONG0300660	Chr3:27609595-27613171	Chr3:27612892-27612965	OrsajM_t22	trnR	NA	non-coding	non-coding
AzucenaRS1	ONG0801050	Chr8:17601092-17672113	Chr8:17654586-17655648	OrsajCp002	psbA	NA	coding	possible functionality
AzucenaRS1	ONG0800690	Chr8:23014317-23019542	Chr8:23016353-23017415	OrsajCp002	psbA	NA	coding	possible functionality
AzucenaRS1	ONG0801050	Chr8:17601092-17672113	Chr8:17636854-17637916	OrsajCp002	psbA	NA	coding	possible functionality
AzucenaRS1	ONG0301370	Chr3:6456251-6490442	Chr3:6466904-6467966	OrsajCp002	psbA	NA	coding	possible functionality
AzucenaRS1	ONG1200350	Chr12:11253067-11258538	Chr12:11255981-11257042	OrsajCp002	psbA	NA	coding	truncated
AzucenaRS1	ONG1000500	Chr10:23065012-23067714	Chr10:23065012-23066051	OrsajCp002	psbA	NA	coding	truncated
AzucenaRS1	ONG0801050	Chr8:17601092-17672113	Chr8:17655867-17658443	OrsajCt121	trnK	NA	non-coding	non-coding
AzucenaRS1	ONG0801050	Chr8:17601092-17672113	Chr8:17638135-17640710	OrsajCt121	trnK	NA	non-coding	non-coding
AzucenaRS1	ONG0301370	Chr3:6456251-6490442	Chr3:6464109-6466685	OrsajCt121	trnK	NA	non-coding	non-coding
AzucenaRS1	ONG1200350	Chr12:11253067-11258538	Chr12:11253188-11255762	OrsajCt121	trnK	NA	non-coding	non-coding
AzucenaRS1	ONG0801050	Chr8:17601092-17672113	Chr8:17656172-17657708	OrsajCp003	matK	NA	coding	possible functionality
AzucenaRS1	ONG0800690	Chr8:23014317-23019542	Chr8:23014317-23015829	OrsajCp003	matK	NA	coding	truncated
AzucenaRS1	ONG0801050	Chr8:17601092-17672113	Chr8:17638440-17639974	OrsajCp003	matK	NA	coding	truncated
AzucenaRS1	ONG0301370	Chr3:6456251-6490442	Chr3:6464844-6466380	OrsajCp003	matK	NA	coding	possible functionality
AzucenaRS1	ONG1200350	Chr12:11253067-11258538	Chr12:11253921-11255457	OrsajCp003	matK	NA	coding	possible functionality
AzucenaRS1	ONG0801050	Chr8:17601092-17672113	Chr8:17658991-17660059	OrsajCp004	RPS16	NA	coding	truncated
AzucenaRS1	ONG0801050	Chr8:17601092-17672113	Chr8:17641247-17642315	OrsajCp004	RPS16	NA	coding	truncated
AzucenaRS1	ONG0301370	Chr3:6456251-6490442	Chr3:6462493-6463561	OrsajCp004	RPS16	NA	coding	truncated
AzucenaRS1	ONG0801050	Chr8:17601092-17672113	Chr8:17643371-17643444	OrsajCt122	trnQ	NA	non-coding	non-coding
AzucenaRS1	ONG0801050	Chr8:17601092-17672113	Chr8:17661120-17661193	OrsajCt122	trnQ	NA	non-coding	non-coding
AzucenaRS1	ONG0301370	Chr3:6456251-6490442	Chr3:6461359-6461432	OrsajCt122	trnQ	NA	non-coding	non-coding
AzucenaRS1	ONG0201190	Chr2:5647393-5666152	Chr2:5664201-5664274	OrsajCt122	trnQ	NA	non-coding	non-coding
AzucenaRS1	ONG0100140	Chr1:5199480-5200543	Chr1:5199559-5199632	OrsajCt122	trnQ	NA	non-coding	non-coding
AzucenaRS1	ONG1000540	Chr10:24389823-24390101	Chr10:24389909-24389982	OrsajCt122	trnQ	NA	non-coding	non-coding
AzucenaRS1	ONG0801050	Chr8:17601092-17672113	Chr8:17661538-17661724	OrsajCp005	psbK	NA	coding	possible functionality
AzucenaRS1	ONG0801050	Chr8:17601092-17672113	Chr8:17643789-17643975	OrsajCp005	psbK	NA	coding	possible functionality
AzucenaRS1	ONG0301370	Chr3:6456251-6490442	Chr3:6460828-6461014	OrsajCp005	psbK	NA	coding	possible functionality
AzucenaRS1	ONG0201190	Chr2:5647393-5666152	Chr2:5663670-5663856	OrsajCp005	psbK	NA	coding	possible functionality
AzucenaRS1	ONG0200320	Chr2:14415137-14465127	Chr2:14464798-14464984	OrsajCp005	psbK	NA	coding	possible functionality
AzucenaRS1	ONG1100630	Chr11:23018200-23018595	Chr11:23018295-23018481	OrsajCp005	psbK	NA	coding	possible functionality
AzucenaRS1	ONG1000530	Chr10:24174361-24178674	Chr10:24178308-24178494	OrsajCp005	psbK	NA	coding	possible functionality
AzucenaRS1	ONG1000530	Chr10:24174361-24178674	Chr10:24177809-24177920	OrsajCp006	psbI	NA	coding	possible functionality
AzucenaRS1	ONG0801050	Chr8:17601092-17672113	Chr8:17644364-17644475	OrsajCp006	psbI	NA	coding	possible functionality
AzucenaRS1	ONG0801050	Chr8:17601092-17672113	Chr8:17662113-17662224	OrsajCp006	psbI	NA	coding	possible functionality
AzucenaRS1	ONG0401220	Chr4:31819174-31827241	Chr4:31827116-31827227	OrsajCp006	psbI	NA	coding	possible functionality
AzucenaRS1	ONG0301370	Chr3:6456251-6490442	Chr3:6460328-6460439	OrsajCp006	psbI	NA	coding	possible functionality
AzucenaRS1	ONG0201190	Chr2:5647393-5666152	Chr2:5663170-5663281	OrsajCp006	psbI	NA	coding	possible functionality
AzucenaRS1	ONG0200320	Chr2:14415137-14465127	Chr2:14464298-14464409	OrsajCp006	psbI	NA	coding	possible functionality
AzucenaRS1	ONG0600050	Chr6:4141304-4141966	Chr6:4141366-4141477	OrsajCp006	psbI	NA	coding	possible functionality
AzucenaRS1	ONG1000530	Chr10:24174361-24178674	Chr10:24177611-24177699	OrsajCt123	trnS	NA	non-coding	non-coding
AzucenaRS1	ONG0801050	Chr8:17601092-17672113	Chr8:17644585-17644673	OrsajCt123	trnS	NA	non-coding	non-coding
AzucenaRS1	ONG0801050	Chr8:17601092-17672113	Chr8:17662334-17662422	OrsajCt123	trnS	NA	non-coding	non-coding
AzucenaRS1	ONG0401220	Chr4:31819174-31827241	Chr4:31826918-31827006	OrsajCt123	trnS	NA	non-coding	non-coding
AzucenaRS1	ONG0301370	Chr3:6456251-6490442	Chr3:6460130-6460218	OrsajCt123	trnS	NA	non-coding	non-coding
AzucenaRS1	ONG0201190	Chr2:5647393-5666152	Chr2:5662972-5663060	OrsajCt123	trnS	NA	non-coding	non-coding
AzucenaRS1	ONG0200320	Chr2:14415137-14465127	Chr2:14464100-14464188	OrsajCt123	trnS	NA	non-coding	non-coding
AzucenaRS1	ONG0200750	Chr2:29535516-29535767	Chr2:29535616-29535704	OrsajCt123	trnS	NA	non-coding	non-coding
AzucenaRS1	ONG0200820	Chr2:33188857-33189010	Chr2:33188918-33189006	OrsajCt123	trnS	NA	non-coding	non-coding
AzucenaRS1	ONG1100690	Chr11:24120653-24120909	Chr11:24120672-24120763	OrsajCt123	trnS	NA	non-coding	non-coding
AzucenaRS1	ONG0801050	Chr8:17601092-17672113	Chr8:17645104-17645407	OrsajCp007	ORF100	NA	coding	possible functionality
AzucenaRS1	ONG0801050	Chr8:17601092-17672113	Chr8:17662854-17663157	OrsajCp007	ORF100	NA	coding	possible functionality
AzucenaRS1	ONG0401220	Chr4:31819174-31827241	Chr4:31826183-31826486	OrsajCp007	ORF100	NA	coding	possible functionality
AzucenaRS1	ONG0301370	Chr3:6456251-6490442	Chr3:6459395-6459698	OrsajCp007	ORF100	NA	coding	possible functionality
AzucenaRS1	ONG0201190	Chr2:5647393-5666152	Chr2:5662237-5662540	OrsajCp007	ORF100	NA	coding	possible functionality
AzucenaRS1	ONG0200320	Chr2:14415137-14465127	Chr2:14463365-14463668	OrsajCp007	ORF100	NA	coding	possible functionality
AzucenaRS1	ONG1000530	Chr10:24174361-24178674	Chr10:24176877-24177180	OrsajCp007	ORF100	NA	coding	possible functionality
AzucenaRS1	ONG0100890	Chr1:34223473-34312493	Chr1:34289813-34290116	OrsajCp007	ORF100	NA	coding	possible functionality
AzucenaRS1	ONG0801050	Chr8:17601092-17672113	Chr8:17645656-17646718	OrsajCp008	psbD	NA	coding	possible functionality
AzucenaRS1	ONG0801050	Chr8:17601092-17672113	Chr8:17663406-17664468	OrsajCp008	psbD	NA	coding	possible functionality
AzucenaRS1	ONG0301370	Chr3:6456251-6490442	Chr3:6458084-6459146	OrsajCp008	psbD	NA	coding	possible functionality
AzucenaRS1	ONG0200320	Chr2:14415137-14465127	Chr2:14462054-14463116	OrsajCp008	psbD	NA	coding	possible functionality
AzucenaRS1	ONG0201190	Chr2:5647393-5666152	Chr2:5660926-5661988	OrsajCp008	psbD	NA	coding	possible functionality
AzucenaRS1	ONG0401220	Chr4:31819174-31827241	Chr4:31824872-31825934	OrsajCp008	psbD	NA	coding	possible functionality
AzucenaRS1	ONG0100890	Chr1:34223473-34312493	Chr1:34290365-34291427	OrsajCp008	psbD	NA	coding	possible functionality
AzucenaRS1	ONG1000530	Chr10:24174361-24178674	Chr10:24175566-24176628	OrsajCp008	psbD	NA	coding	possible functionality
AzucenaRS1	ONG0801050	Chr8:17601092-17672113	Chr8:17646665-17648087	OrsajCp009	psbC	NA	coding	possible functionality
AzucenaRS1	ONG0801050	Chr8:17601092-17672113	Chr8:17664415-17665837	OrsajCp009	psbC	NA	coding	possible functionality
AzucenaRS1	ONG0401220	Chr4:31819174-31827241	Chr4:31823503-31824925	OrsajCp009	psbC	NA	coding	possible functionality
AzucenaRS1	ONG0301370	Chr3:6456251-6490442	Chr3:6456715-6458137	OrsajCp009	psbC	NA	coding	possible functionality
AzucenaRS1	ONG0201190	Chr2:5647393-5666152	Chr2:5659557-5660979	OrsajCp009	psbC	NA	coding	possible functionality
AzucenaRS1	ONG0200320	Chr2:14415137-14465127	Chr2:14460685-14462107	OrsajCp009	psbC	NA	coding	possible functionality
AzucenaRS1	ONG0100890	Chr1:34223473-34312493	Chr1:34291374-34292796	OrsajCp009	psbC	NA	coding	possible functionality
AzucenaRS1	ONG0500620	Chr5:13334389-13365293	Chr5:13356413-13357835	OrsajCp009	psbC	NA	coding	possible functionality
AzucenaRS1	ONG0801050	Chr8:17601092-17672113	Chr8:17648259-17648347	OrsajCt124	trnS	NA	non-coding	non-coding
AzucenaRS1	ONG0801050	Chr8:17601092-17672113	Chr8:17666009-17666097	OrsajCt124	trnS	NA	non-coding	non-coding
AzucenaRS1	ONG0500620	Chr5:13334389-13365293	Chr5:13358008-13358096	OrsajCt124	trnS	NA	non-coding	non-coding
AzucenaRS1	ONG0401220	Chr4:31819174-31827241	Chr4:31823243-31823331	OrsajCt124	trnS	NA	non-coding	non-coding
AzucenaRS1	ONG0400110	Chr4:4782570-4783283	Chr4:4783014-4783102	OrsajCt124	trnS	NA	non-coding	non-coding
AzucenaRS1	ONG0301370	Chr3:6456251-6490442	Chr3:6456455-6456543	OrsajCt124	trnS	NA	non-coding	non-coding
AzucenaRS1	ONG0300920	Chr3:36555886-36556843	Chr3:36556041-36556129	OrsajCt124	trnS	NA	non-coding	non-coding
AzucenaRS1	ONG0201190	Chr2:5647393-5666152	Chr2:5659297-5659385	OrsajCt124	trnS	NA	non-coding	non-coding
AzucenaRS1	ONG0200320	Chr2:14415137-14465127	Chr2:14460425-14460513	OrsajCt124	trnS	NA	non-coding	non-coding
AzucenaRS1	ONG0100890	Chr1:34223473-34312493	Chr1:34292968-34293056	OrsajCt124	trnS	NA	non-coding	non-coding
AzucenaRS1	ONG0801050	Chr8:17601092-17672113	Chr8:17648693-17648882	OrsajCp010	psbZ	NA	coding	possible functionality
AzucenaRS1	ONG0801050	Chr8:17601092-17672113	Chr8:17666443-17666632	OrsajCp010	psbZ	NA	coding	possible functionality
AzucenaRS1	ONG0401220	Chr4:31819174-31827241	Chr4:31822708-31822897	OrsajCp010	psbZ	NA	coding	possible functionality
AzucenaRS1	ONG0300920	Chr3:36555886-36556843	Chr3:36556475-36556664	OrsajCp010	psbZ	NA	coding	possible functionality
AzucenaRS1	ONG0201190	Chr2:5647393-5666152	Chr2:5658762-5658951	OrsajCp010	psbZ	NA	coding	possible functionality
AzucenaRS1	ONG0200320	Chr2:14415137-14465127	Chr2:14459890-14460079	OrsajCp010	psbZ	NA	coding	possible functionality
AzucenaRS1	ONG0100890	Chr1:34223473-34312493	Chr1:34293402-34293591	OrsajCp010	psbZ	NA	coding	possible functionality
AzucenaRS1	ONG1200530	Chr12:19618937-19621392	Chr12:19621100-19621289	OrsajCp010	psbZ	NA	coding	possible functionality
AzucenaRS1	ONG0801050	Chr8:17601092-17672113	Chr8:17649087-17649158	OrsajCt125	trnG	NA	non-coding	non-coding
AzucenaRS1	ONG0801050	Chr8:17601092-17672113	Chr8:17666837-17666908	OrsajCt125	trnG	NA	non-coding	non-coding
AzucenaRS1	ONG0401220	Chr4:31819174-31827241	Chr4:31822432-31822503	OrsajCt125	trnG	NA	non-coding	non-coding
AzucenaRS1	ONG0200320	Chr2:14415137-14465127	Chr2:14459614-14459685	OrsajCt125	trnG	NA	non-coding	non-coding
AzucenaRS1	ONG0201190	Chr2:5647393-5666152	Chr2:5658486-5658557	OrsajCt125	trnG	NA	non-coding	non-coding
AzucenaRS1	ONG0100890	Chr1:34223473-34312493	Chr1:34293796-34293867	OrsajCt125	trnG	NA	non-coding	non-coding
AzucenaRS1	ONG1200530	Chr12:19618937-19621392	Chr12:19620896-19620967	OrsajCt125	trnG	NA	non-coding	non-coding
AzucenaRS1	ONG0801050	Chr8:17601092-17672113	Chr8:17649284-17649358	OrsajCt126	trnG	NA	non-coding	non-coding
AzucenaRS1	ONG0801050	Chr8:17601092-17672113	Chr8:17667034-17667108	OrsajCt126	trnG	NA	non-coding	non-coding
AzucenaRS1	ONG0401220	Chr4:31819174-31827241	Chr4:31822232-31822306	OrsajCt126	trnG	NA	non-coding	non-coding
AzucenaRS1	ONG0201190	Chr2:5647393-5666152	Chr2:5658286-5658360	OrsajCt126	trnG	NA	non-coding	non-coding
AzucenaRS1	ONG0200320	Chr2:14415137-14465127	Chr2:14459414-14459488	OrsajCt126	trnG	NA	non-coding	non-coding
AzucenaRS1	ONG0100890	Chr1:34223473-34312493	Chr1:34293993-34294067	OrsajCt126	trnG	NA	non-coding	non-coding
AzucenaRS1	ONG0801050	Chr8:17601092-17672113	Chr8:17649595-17649669	OrsajCt127	trnfM	NA	non-coding	non-coding
AzucenaRS1	ONG0801050	Chr8:17601092-17672113	Chr8:17667345-17667419	OrsajCt127	trnfM	NA	non-coding	non-coding
AzucenaRS1	ONG0401220	Chr4:31819174-31827241	Chr4:31821921-31821995	OrsajCt127	trnfM	NA	non-coding	non-coding
AzucenaRS1	ONG0201190	Chr2:5647393-5666152	Chr2:5657975-5658049	OrsajCt127	trnfM	NA	non-coding	non-coding
AzucenaRS1	ONG0200320	Chr2:14415137-14465127	Chr2:14459103-14459177	OrsajCt127	trnfM	NA	non-coding	non-coding
AzucenaRS1	ONG0100890	Chr1:34223473-34312493	Chr1:34294300-34294374	OrsajCt127	trnfM	NA	non-coding	non-coding
AzucenaRS1	ONG1200530	Chr12:19618937-19621392	Chr12:19620382-19620458	OrsajCt127	trnfM	NA	non-coding	non-coding
AzucenaRS1	ONG0801050	Chr8:17601092-17672113	Chr8:17668585-17668855	OrsajCp011	ORF91	NA	coding	possible functionality
AzucenaRS1	ONG0401220	Chr4:31819174-31827241	Chr4:31820485-31820755	OrsajCp011	ORF91	NA	coding	possible functionality
AzucenaRS1	ONG0201190	Chr2:5647393-5666152	Chr2:5656539-5656809	OrsajCp011	ORF91	NA	coding	possible functionality
AzucenaRS1	ONG0200320	Chr2:14415137-14465127	Chr2:14457667-14457937	OrsajCp011	ORF91	NA	coding	possible functionality
AzucenaRS1	ONG0100890	Chr1:34223473-34312493	Chr1:34236062-34236332	OrsajCp011	ORF91	NA	coding	possible functionality
AzucenaRS1	ONG0100890	Chr1:34223473-34312493	Chr1:34295537-34295807	OrsajCp011	ORF91	NA	coding	possible functionality
AzucenaRS1	ONG0801050	Chr8:17601092-17672113	Chr8:17668696-17668772	OrsajCt129	trnI	NA	non-coding	non-coding
AzucenaRS1	ONG0401220	Chr4:31819174-31827241	Chr4:31820568-31820644	OrsajCt129	trnI	NA	non-coding	non-coding
AzucenaRS1	ONG0201190	Chr2:5647393-5666152	Chr2:5656622-5656698	OrsajCt129	trnI	NA	non-coding	non-coding
AzucenaRS1	ONG0200320	Chr2:14415137-14465127	Chr2:14457750-14457826	OrsajCt129	trnI	NA	non-coding	non-coding
AzucenaRS1	ONG0100890	Chr1:34223473-34312493	Chr1:34236145-34236221	OrsajCt129	trnI	NA	non-coding	non-coding
AzucenaRS1	ONG0100890	Chr1:34223473-34312493	Chr1:34295648-34295724	OrsajCt129	trnI	NA	non-coding	non-coding
AzucenaRS1	ONG0801050	Chr8:17601092-17672113	Chr8:17669079-17669292	OrsajCp012	ORF70	NA	coding	possible functionality
AzucenaRS1	ONG0401220	Chr4:31819174-31827241	Chr4:31820048-31820261	OrsajCp012	ORF70	NA	coding	possible functionality
AzucenaRS1	ONG0201190	Chr2:5647393-5666152	Chr2:5656102-5656315	OrsajCp012	ORF70	NA	coding	possible functionality
AzucenaRS1	ONG0200320	Chr2:14415137-14465127	Chr2:14457230-14457443	OrsajCp012	ORF70	NA	coding	possible functionality
AzucenaRS1	ONG0200870	Chr2:35713496-35714045	Chr2:35713614-35713820	OrsajCp012	ORF70	NA	coding	truncated
AzucenaRS1	ONG0100890	Chr1:34223473-34312493	Chr1:34235625-34235838	OrsajCp012	ORF70	NA	coding	possible functionality
AzucenaRS1	ONG0801050	Chr8:17601092-17672113	Chr8:17669567-17669639	OrsajCt130	trnT	NA	non-coding	non-coding
AzucenaRS1	ONG0401220	Chr4:31819174-31827241	Chr4:31819701-31819773	OrsajCt130	trnT	NA	non-coding	non-coding
AzucenaRS1	ONG0400220	Chr4:9700883-9702066	Chr4:9701902-9701974	OrsajCt130	trnT	NA	non-coding	non-coding
AzucenaRS1	ONG0201190	Chr2:5647393-5666152	Chr2:5655755-5655827	OrsajCt130	trnT	NA	non-coding	non-coding
AzucenaRS1	ONG0200320	Chr2:14415137-14465127	Chr2:14456883-14456955	OrsajCt130	trnT	NA	non-coding	non-coding
AzucenaRS1	ONG0100890	Chr1:34223473-34312493	Chr1:34235278-34235350	OrsajCt130	trnT	NA	non-coding	non-coding
AzucenaRS1	ONG0801050	Chr8:17601092-17672113	Chr8:17669635-17669708	OrsajCt131	trnT	NA	non-coding	non-coding
AzucenaRS1	ONG0400220	Chr4:9700883-9702066	Chr4:9701833-9701906	OrsajCt131	trnT	NA	non-coding	non-coding
AzucenaRS1	ONG0401220	Chr4:31819174-31827241	Chr4:31819632-31819705	OrsajCt131	trnT	NA	non-coding	non-coding
AzucenaRS1	ONG0201190	Chr2:5647393-5666152	Chr2:5655686-5655759	OrsajCt131	trnT	NA	non-coding	non-coding
AzucenaRS1	ONG0200320	Chr2:14415137-14465127	Chr2:14456814-14456887	OrsajCt131	trnT	NA	non-coding	non-coding
AzucenaRS1	ONG0100890	Chr1:34223473-34312493	Chr1:34235209-34235282	OrsajCt131	trnT	NA	non-coding	non-coding
AzucenaRS1	ONG0801050	Chr8:17601092-17672113	Chr8:17670157-17670230	OrsajCt132	trnE	NA	non-coding	non-coding
AzucenaRS1	ONG0201190	Chr2:5647393-5666152	Chr2:5655164-5655237	OrsajCt132	trnE	NA	non-coding	non-coding
AzucenaRS1	ONG0200320	Chr2:14415137-14465127	Chr2:14456292-14456365	OrsajCt132	trnE	NA	non-coding	non-coding
AzucenaRS1	ONG0200020	Chr2:1033056-1033304	Chr2:1033060-1033131	OrsajCt132	trnE	NA	non-coding	non-coding
AzucenaRS1	ONG0100890	Chr1:34223473-34312493	Chr1:34231539-34231612	OrsajCt132	trnE	NA	non-coding	non-coding
AzucenaRS1	ONG0801050	Chr8:17601092-17672113	Chr8:17670291-17670375	OrsajCt133	trnY	NA	non-coding	non-coding
AzucenaRS1	ONG0201190	Chr2:5647393-5666152	Chr2:5655019-5655103	OrsajCt133	trnY	NA	non-coding	non-coding
AzucenaRS1	ONG0200320	Chr2:14415137-14465127	Chr2:14456147-14456231	OrsajCt133	trnY	NA	non-coding	non-coding
AzucenaRS1	ONG0200020	Chr2:1033056-1033304	Chr2:1033193-1033273	OrsajCt133	trnY	NA	non-coding	non-coding
AzucenaRS1	ONG0100890	Chr1:34223473-34312493	Chr1:34231394-34231478	OrsajCt133	trnY	NA	non-coding	non-coding
AzucenaRS1	ONG0801050	Chr8:17601092-17672113	Chr8:17670738-17670812	OrsajCt134	trnD	NA	non-coding	non-coding
AzucenaRS1	ONG0201190	Chr2:5647393-5666152	Chr2:5654582-5654656	OrsajCt134	trnD	NA	non-coding	non-coding
AzucenaRS1	ONG0200320	Chr2:14415137-14465127	Chr2:14455710-14455784	OrsajCt134	trnD	NA	non-coding	non-coding
AzucenaRS1	ONG1100400	Chr11:14659457-14664642	Chr11:14659603-14659677	OrsajCt134	trnD	NA	non-coding	non-coding
AzucenaRS1	ONG0600920	Chr6:9222128-9227823	Chr6:9222489-9222563	OrsajCt134	trnD	NA	non-coding	non-coding
AzucenaRS1	ONG0100890	Chr1:34223473-34312493	Chr1:34230960-34231031	OrsajCt134	trnD	NA	non-coding	non-coding
AzucenaRS1	ONG0801050	Chr8:17601092-17672113	Chr8:17671192-17671297	OrsajCp013	psbM	NA	coding	possible functionality
AzucenaRS1	ONG0200320	Chr2:14415137-14465127	Chr2:14455225-14455330	OrsajCp013	psbM	NA	coding	possible functionality
AzucenaRS1	ONG0200320	Chr2:14415137-14465127	Chr2:14454392-14454482	OrsajCp014	petN	NA	coding	possible functionality
AzucenaRS1	ONG0200320	Chr2:14415137-14465127	Chr2:14453908-14453979	OrsajCt135	trnC	NA	non-coding	non-coding
AzucenaRS1	ONG0200320	Chr2:14415137-14465127	Chr2:14449596-14452825	OrsajCp015	rpoB	NA	coding	truncated
AzucenaRS1	ONG0200320	Chr2:14415137-14465127	Chr2:14447510-14449559	OrsajCp016	rpoC1	NA	coding	possible functionality
AzucenaRS1	ONG0100890	Chr1:34223473-34312493	Chr1:34238845-34240894	OrsajCp016	rpoC1	NA	coding	possible functionality
AzucenaRS1	ONG1000620	Chr10:21676258-21685243	Chr10:21682031-21684081	OrsajCp016	rpoC1	NA	coding	truncated
AzucenaRS1	ONG1000870	Chr10:8996935-9036133	Chr10:9033400-9034111	OrsajCp018	RPS2	NA	coding	possible functionality
AzucenaRS1	ONG0200320	Chr2:14415137-14465127	Chr2:14445573-14446284	OrsajCp018	RPS2	NA	coding	possible functionality
AzucenaRS1	ONG1000870	Chr10:8996935-9036133	Chr10:9032406-9033150	OrsajCp019	atpI	NA	coding	possible functionality
AzucenaRS1	ONG1000870	Chr10:8996935-9036133	Chr10:9031366-9031612	OrsajCp020	atpH	NA	coding	possible functionality
AzucenaRS1	ONG0801050	Chr8:17601092-17672113	Chr8:17616526-17616772	OrsajCp020	atpH	NA	coding	possible functionality
AzucenaRS1	ONG1000870	Chr10:8996935-9036133	Chr10:9029541-9030911	OrsajCp021	atpF	NA	coding	truncated
AzucenaRS1	ONG0801050	Chr8:17601092-17672113	Chr8:17617223-17618592	OrsajCp021	atpF	NA	coding	truncated
AzucenaRS1	ONG0301370	Chr3:6456251-6490442	Chr3:6478929-6480453	OrsajCp022	atpA	NA	coding	possible functionality
AzucenaRS1	ONG1000870	Chr10:8996935-9036133	Chr10:9027916-9029441	OrsajCp022	atpA	NA	coding	truncated
AzucenaRS1	ONG0801050	Chr8:17601092-17672113	Chr8:17618692-17620216	OrsajCp022	atpA	NA	coding	truncated
AzucenaRS1	ONG1000870	Chr10:8996935-9036133	Chr10:9027712-9027784	OrsajCt136	trnR	NA	non-coding	non-coding
AzucenaRS1	ONG0301370	Chr3:6456251-6490442	Chr3:6480585-6480657	OrsajCt136	trnR	NA	non-coding	non-coding
AzucenaRS1	ONG0300660	Chr3:29591691-29595267	Chr3:29594988-29595061	OrsajCt136	trnR	NA	non-coding	non-coding
AzucenaRS1	ONG0801050	Chr8:17601092-17672113	Chr8:17620348-17620418	OrsajCt136	trnR	NA	non-coding	non-coding
AzucenaRS1	ONG0301370	Chr3:6456251-6490442	Chr3:6481028-6481340	OrsajCp023	RPS14	NA	coding	possible functionality
AzucenaRS1	ONG1000870	Chr10:8996935-9036133	Chr10:9027028-9027341	OrsajCp023	RPS14	NA	coding	truncated
AzucenaRS1	ONG0301370	Chr3:6456251-6490442	Chr3:6481487-6483692	OrsajCp024	psaB	NA	coding	possible functionality
AzucenaRS1	ONG0100890	Chr1:34223473-34312493	Chr1:34248205-34250410	OrsajCp024	psaB	NA	coding	possible functionality
AzucenaRS1	ONG1000870	Chr10:8996935-9036133	Chr10:9024676-9026881	OrsajCp024	psaB	NA	coding	possible functionality
AzucenaRS1	ONG0301370	Chr3:6456251-6490442	Chr3:6483717-6485970	OrsajCp025	psaA	NA	coding	possible functionality
AzucenaRS1	ONG0100890	Chr1:34223473-34312493	Chr1:34250435-34252688	OrsajCp025	psaA	NA	coding	possible functionality
AzucenaRS1	ONG1000870	Chr10:8996935-9036133	Chr10:9022411-9024651	OrsajCp025	psaA	NA	coding	truncated
AzucenaRS1	ONG0101580	Chr1:26393644-26435187	Chr1:26432164-26434143	OrsajCp026	YCF3	NA	coding	truncated
AzucenaRS1	ONG0100890	Chr1:34223473-34312493	Chr1:34253288-34255267	OrsajCp026	YCF3	NA	coding	truncated
AzucenaRS1	ONG0100890	Chr1:34223473-34312493	Chr1:34241974-34242576	OrsajCp027	RPS4	NA	coding	truncated
AzucenaRS1	ONG1200630	Chr12:22271338-22272696	Chr12:22271557-22271630	OrsajCt138	trnT	NA	non-coding	non-coding
AzucenaRS1	ONG1200630	Chr12:22271338-22272696	Chr12:22272565-22272638	OrsajCt138	trnT	NA	non-coding	non-coding
AzucenaRS1	ONG1200340	Chr12:11107495-11126183	Chr12:11107563-11107636	OrsajCt138	trnT	NA	non-coding	non-coding
AzucenaRS1	ONG1200630	Chr12:22271338-22272696	Chr12:22272061-22272134	OrsajCt138	trnT	NA	non-coding	non-coding
AzucenaRS1	ONG0100890	Chr1:34223473-34312493	Chr1:34286267-34286340	OrsajCt138	trnT	NA	non-coding	non-coding
AzucenaRS1	ONG0100890	Chr1:34223473-34312493	Chr1:34284871-34285497	OrsajCt139	trnL	NA	non-coding	non-coding
AzucenaRS1	ONG1200340	Chr12:11107495-11126183	Chr12:11120220-11120846	OrsajCt139	trnL	NA	non-coding	non-coding
AzucenaRS1	ONG0301370	Chr3:6456251-6490442	Chr3:6490113-6490186	OrsajCt140	trnF	NA	non-coding	non-coding
AzucenaRS1	ONG0101580	Chr1:26393644-26435187	Chr1:26408539-26408612	OrsajCt140	trnF	NA	non-coding	non-coding
AzucenaRS1	ONG0100890	Chr1:34223473-34312493	Chr1:34243286-34243359	OrsajCt140	trnF	NA	non-coding	non-coding
AzucenaRS1	ONG0100890	Chr1:34223473-34312493	Chr1:34284555-34284628	OrsajCt140	trnF	NA	non-coding	non-coding
AzucenaRS1	ONG1200340	Chr12:11107495-11126183	Chr12:11121091-11121164	OrsajCt140	trnF	NA	non-coding	non-coding
AzucenaRS1	ONG1200340	Chr12:11107495-11126183	Chr12:11121658-11122138	OrsajCp028	ndhJ	NA	coding	possible functionality
AzucenaRS1	ONG0301370	Chr3:6456251-6490442	Chr3:6489139-6489619	OrsajCp028	ndhJ	NA	coding	possible functionality
AzucenaRS1	ONG0100890	Chr1:34223473-34312493	Chr1:34283581-34284061	OrsajCp028	ndhJ	NA	coding	possible functionality
AzucenaRS1	ONG0101580	Chr1:26393644-26435187	Chr1:26409106-26409586	OrsajCp028	ndhJ	NA	coding	possible functionality
AzucenaRS1	ONG0100890	Chr1:34223473-34312493	Chr1:34243919-34244403	OrsajCp028	ndhJ	NA	coding	truncated
AzucenaRS1	ONG0500800	Chr5:6703677-6710515	Chr5:6709861-6710341	OrsajCp028	ndhJ	NA	coding	possible functionality
AzucenaRS1	ONG0801050	Chr8:17601092-17672113	Chr8:17612430-17612904	OrsajCp028	ndhJ	NA	coding	truncated
AzucenaRS1	ONG1200340	Chr12:11107495-11126183	Chr12:11122235-11122913	OrsajCp029	ndhK	NA	coding	possible functionality
AzucenaRS1	ONG0301370	Chr3:6456251-6490442	Chr3:6488364-6489042	OrsajCp029	ndhK	NA	coding	possible functionality
AzucenaRS1	ONG0100890	Chr1:34223473-34312493	Chr1:34282806-34283484	OrsajCp029	ndhK	NA	coding	possible functionality
AzucenaRS1	ONG0100890	Chr1:34223473-34312493	Chr1:34244500-34245156	OrsajCp029	ndhK	NA	coding	truncated
AzucenaRS1	ONG0801050	Chr8:17601092-17672113	Chr8:17611653-17612331	OrsajCp029	ndhK	NA	coding	truncated
AzucenaRS1	ONG0600260	Chr6:12506510-12509730	Chr6:12508539-12509217	OrsajCp029	ndhK	NA	coding	possible functionality
AzucenaRS1	ONG0500800	Chr5:6703677-6710515	Chr5:6709086-6709764	OrsajCp029	ndhK	NA	coding	possible functionality
AzucenaRS1	ONG0301370	Chr3:6456251-6490442	Chr3:6487948-6488311	OrsajCp030	ndhC	NA	coding	possible functionality
AzucenaRS1	ONG0100890	Chr1:34223473-34312493	Chr1:34282390-34282753	OrsajCp030	ndhC	NA	coding	possible functionality
AzucenaRS1	ONG1200340	Chr12:11107495-11126183	Chr12:11122963-11123326	OrsajCp030	ndhC	NA	coding	possible functionality
AzucenaRS1	ONG1200160	Chr12:5565442-5614888	Chr12:5565858-5566221	OrsajCp030	ndhC	NA	coding	truncated
AzucenaRS1	ONG0500800	Chr5:6703677-6710515	Chr5:6708673-6709036	OrsajCp030	ndhC	NA	coding	possible functionality
AzucenaRS1	ONG0801050	Chr8:17601092-17672113	Chr8:17611239-17611603	OrsajCp030	ndhC	NA	coding	truncated
AzucenaRS1	ONG0400180	Chr4:8676829-8678804	Chr4:8676967-8677333	OrsajCp030	ndhC	NA	coding	truncated
AzucenaRS1	ONG0400180	Chr4:12422513-12424495	Chr4:12422653-12423020	OrsajCp030	ndhC	NA	coding	truncated
AzucenaRS1	ONG0600260	Chr6:12506510-12509730	Chr6:12508120-12508490	OrsajCp030	ndhC	NA	coding	truncated
AzucenaRS1	ONG1200160	Chr12:5565442-5614888	Chr12:5567559-5567598	OrsajCt141	trnV	NA	non-coding	non-coding
AzucenaRS1	ONG1200760	Chr12:8132460-8224009	Chr12:8136141-8136180	OrsajCt141	trnV	NA	non-coding	non-coding
AzucenaRS1	ONG1200340	Chr12:11107495-11126183	Chr12:11124664-11124703	OrsajCt141	trnV	NA	non-coding	non-coding
AzucenaRS1	ONG0600260	Chr6:12506510-12509730	Chr6:12506743-12506782	OrsajCt141	trnV	NA	non-coding	non-coding
AzucenaRS1	ONG0100890	Chr1:34223473-34312493	Chr1:34281013-34281052	OrsajCt141	trnV	NA	non-coding	non-coding
AzucenaRS1	ONG0801050	Chr8:17601092-17672113	Chr8:17609867-17609906	OrsajCt141	trnV	NA	non-coding	non-coding
AzucenaRS1	ONG1200760	Chr12:8132460-8224009	Chr12:8135891-8135964	OrsajCt142	trnM	NA	non-coding	non-coding
AzucenaRS1	ONG1200340	Chr12:11107495-11126183	Chr12:11124884-11124957	OrsajCt142	trnM	NA	non-coding	non-coding
AzucenaRS1	ONG1200160	Chr12:5565442-5614888	Chr12:5567779-5567852	OrsajCt142	trnM	NA	non-coding	non-coding
AzucenaRS1	ONG0801050	Chr8:17601092-17672113	Chr8:17609613-17609686	OrsajCt142	trnM	NA	non-coding	non-coding
AzucenaRS1	ONG0600020	Chr6:1365756-1370765	Chr6:1365999-1366072	OrsajCt142	trnM	NA	non-coding	non-coding
AzucenaRS1	ONG0100890	Chr1:34223473-34312493	Chr1:34265419-34265492	OrsajCt142	trnM	NA	non-coding	non-coding
AzucenaRS1	ONG0100890	Chr1:34223473-34312493	Chr1:34280759-34280832	OrsajCt142	trnM	NA	non-coding	non-coding
AzucenaRS1	ONG0101590	Chr1:3207552-3208551	Chr1:3208461-3208534	OrsajCt142	trnM	NA	non-coding	non-coding
AzucenaRS1	ONG1100300	Chr11:10787441-10788829	Chr11:10787642-10787715	OrsajCt142	trnM	NA	non-coding	non-coding
AzucenaRS1	ONG0500800	Chr5:6703677-6710515	Chr5:6707042-6707115	OrsajCt142	trnM	NA	non-coding	non-coding
AzucenaRS1	ONG0301360	Chr3:5087518-5101484	Chr3:5099015-5099087	OrsajCt142	trnM	NA	non-coding	non-coding
AzucenaRS1	ONG0100890	Chr1:34223473-34312493	Chr1:34265604-34266018	OrsajCp031	atpE	NA	coding	possible functionality
AzucenaRS1	ONG0100890	Chr1:34223473-34312493	Chr1:34280233-34280647	OrsajCp031	atpE	NA	coding	possible functionality
AzucenaRS1	ONG0101590	Chr1:3207552-3208551	Chr1:3207935-3208349	OrsajCp031	atpE	NA	coding	truncated
AzucenaRS1	ONG1200160	Chr12:5565442-5614888	Chr12:5567964-5568378	OrsajCp031	atpE	NA	coding	possible functionality
AzucenaRS1	ONG1200340	Chr12:11107495-11126183	Chr12:11125069-11125483	OrsajCp031	atpE	NA	coding	possible functionality
AzucenaRS1	ONG1200760	Chr12:8132460-8224009	Chr12:8135385-8135791	OrsajCp031	atpE	NA	coding	truncated
AzucenaRS1	ONG0500800	Chr5:6703677-6710515	Chr5:6706512-6706926	OrsajCp031	atpE	NA	coding	possible functionality
AzucenaRS1	ONG0600020	Chr6:1365756-1370765	Chr6:1366185-1366598	OrsajCp031	atpE	NA	coding	truncated
AzucenaRS1	ONG0801050	Chr8:17601092-17672113	Chr8:17609087-17609501	OrsajCp031	atpE	NA	coding	possible functionality
AzucenaRS1	ONG0800490	Chr8:16836787-16837452	Chr8:16837026-16837442	OrsajCp031	atpE	NA	coding	truncated
AzucenaRS1	ONG0100890	Chr1:34223473-34312493	Chr1:34278740-34280237	OrsajCp032	atpB	NA	coding	possible functionality
AzucenaRS1	ONG0100370	Chr1:14591105-14593999	Chr1:14591293-14592792	OrsajCp032	atpB	NA	coding	truncated
AzucenaRS1	ONG1200160	Chr12:5565442-5614888	Chr12:5568374-5569871	OrsajCp032	atpB	NA	coding	truncated
AzucenaRS1	ONG0500800	Chr5:6703677-6710515	Chr5:6705034-6706516	OrsajCp032	atpB	NA	coding	possible functionality
AzucenaRS1	ONG0100890	Chr1:34223473-34312493	Chr1:34272046-34273480	OrsajCp033	rbcL	NA	coding	possible functionality
AzucenaRS1	ONG0100890	Chr1:34223473-34312493	Chr1:34276509-34277943	OrsajCp033	rbcL	NA	coding	possible functionality
AzucenaRS1	ONG1200160	Chr12:5565442-5614888	Chr12:5570669-5572103	OrsajCp033	rbcL	NA	coding	possible functionality
AzucenaRS1	ONG0100890	Chr1:34223473-34312493	Chr1:34273757-34273886	OrsajCp034	ORF42	NA	coding	possible functionality
AzucenaRS1	ONG0100890	Chr1:34223473-34312493	Chr1:34276103-34276232	OrsajCp034	ORF42	NA	coding	possible functionality
AzucenaRS1	ONG1100560	Chr11:19761741-19806604	Chr11:19806224-19806354	OrsajCp034	ORF42	NA	coding	truncated
AzucenaRS1	ONG0100890	Chr1:34223473-34312493	Chr1:34273909-34274311	OrsajCp035	ORF133	NA	coding	possible functionality
AzucenaRS1	ONG0100890	Chr1:34223473-34312493	Chr1:34275678-34276080	OrsajCp035	ORF133	NA	coding	possible functionality
AzucenaRS1	ONG0100890	Chr1:34223473-34312493	Chr1:34295937-34296339	OrsajCp035	ORF133	NA	coding	possible functionality
AzucenaRS1	ONG0100890	Chr1:34223473-34312493	Chr1:34274505-34274826	OrsajCp036	ORF106	NA	coding	possible functionality
AzucenaRS1	ONG0100890	Chr1:34223473-34312493	Chr1:34275163-34275484	OrsajCp036	ORF106	NA	coding	possible functionality
AzucenaRS1	ONG0100890	Chr1:34223473-34312493	Chr1:34296533-34296853	OrsajCp036	ORF106	NA	coding	truncated
AzucenaRS1	ONG0100550	Chr1:21074779-21081059	Chr1:21075263-21075374	OrsajCp037	psaI	NA	coding	possible functionality
AzucenaRS1	ONG0100890	Chr1:34223473-34312493	Chr1:34297191-34297302	OrsajCp037	psaI	NA	coding	possible functionality
AzucenaRS1	ONG0400760	Chr4:26021386-26021659	Chr4:26021522-26021631	OrsajCp037	psaI	NA	coding	truncated
AzucenaRS1	ONG0100890	Chr1:34223473-34312493	Chr1:34300850-34301408	OrsajCp038	YCF4	NA	coding	possible functionality
AzucenaRS1	ONG0100550	Chr1:21074779-21081059	Chr1:21075742-21076300	OrsajCp038	YCF4	NA	coding	possible functionality
AzucenaRS1	ONG0200320	Chr2:14415137-14465127	Chr2:14440088-14440646	OrsajCp038	YCF4	NA	coding	possible functionality
AzucenaRS1	ONG0200320	Chr2:14415137-14465127	Chr2:14439799-14440058	OrsajCp039	ORF85	NA	coding	truncated
AzucenaRS1	ONG0100890	Chr1:34223473-34312493	Chr1:34301438-34301697	OrsajCp039	ORF85	NA	coding	truncated
AzucenaRS1	ONG0100550	Chr1:21074779-21081059	Chr1:21076330-21076588	OrsajCp039	ORF85	NA	coding	truncated
AzucenaRS1	ONG1200160	Chr12:5565442-5614888	Chr12:5592159-5592418	OrsajCp039	ORF85	NA	coding	truncated
AzucenaRS1	ONG0600920	Chr6:9222128-9227823	Chr6:9227538-9227797	OrsajCp039	ORF85	NA	coding	truncated
AzucenaRS1	ONG0200320	Chr2:14415137-14465127	Chr2:14438976-14439669	OrsajCp040	cemA	NA	coding	possible functionality
AzucenaRS1	ONG1200160	Chr12:5565442-5614888	Chr12:5592553-5593243	OrsajCp040	cemA	NA	coding	truncated
AzucenaRS1	ONG0100550	Chr1:21074779-21081059	Chr1:21076726-21077417	OrsajCp040	cemA	NA	coding	truncated
AzucenaRS1	ONG0101010	Chr1:38938198-38941759	Chr1:38940134-38941097	OrsajCp041	petA	NA	coding	possible functionality
AzucenaRS1	ONG0100550	Chr1:21074779-21081059	Chr1:21077613-21078574	OrsajCp041	petA	NA	coding	truncated
AzucenaRS1	ONG0200320	Chr2:14415137-14465127	Chr2:14437784-14438747	OrsajCp041	petA	NA	coding	possible functionality
AzucenaRS1	ONG1200160	Chr12:5565442-5614888	Chr12:5593472-5594435	OrsajCp041	petA	NA	coding	truncated
AzucenaRS1	ONG0900520	Chr9:22036176-22036777	Chr9:22036183-22036306	OrsajCp042	psbJ	NA	coding	possible functionality
AzucenaRS1	ONG0200320	Chr2:14415137-14465127	Chr2:14436660-14436783	OrsajCp042	psbJ	NA	coding	possible functionality
AzucenaRS1	ONG0101010	Chr1:38938198-38941759	Chr1:38939011-38939134	OrsajCp042	psbJ	NA	coding	possible functionality
AzucenaRS1	ONG0100550	Chr1:21074779-21081059	Chr1:21080641-21080764	OrsajCp042	psbJ	NA	coding	possible functionality
AzucenaRS1	ONG1200160	Chr12:5565442-5614888	Chr12:5595383-5595506	OrsajCp042	psbJ	NA	coding	possible functionality
AzucenaRS1	ONG1000620	Chr10:21676258-21685243	Chr10:21679203-21679326	OrsajCp042	psbJ	NA	coding	possible functionality
AzucenaRS1	ONG1000620	Chr10:21676258-21685243	Chr10:21678960-21679077	OrsajCp043	psbL	NA	coding	possible functionality
AzucenaRS1	ONG0900520	Chr9:22036176-22036777	Chr9:22036432-22036549	OrsajCp043	psbL	NA	coding	possible functionality
AzucenaRS1	ONG0200320	Chr2:14415137-14465127	Chr2:14436417-14436534	OrsajCp043	psbL	NA	coding	possible functionality
AzucenaRS1	ONG0100550	Chr1:21074779-21081059	Chr1:21080890-21081007	OrsajCp043	psbL	NA	coding	possible functionality
AzucenaRS1	ONG0101010	Chr1:38938198-38941759	Chr1:38938768-38938885	OrsajCp043	psbL	NA	coding	possible functionality
AzucenaRS1	ONG0300580	Chr3:28232030-28232388	Chr3:28232097-28232214	OrsajCp043	psbL	NA	coding	possible functionality
AzucenaRS1	ONG1200160	Chr12:5565442-5614888	Chr12:5595632-5595749	OrsajCp043	psbL	NA	coding	possible functionality
AzucenaRS1	ONG1000620	Chr10:21676258-21685243	Chr10:21678818-21678938	OrsajCp044	psbF	NA	coding	possible functionality
AzucenaRS1	ONG0900520	Chr9:22036176-22036777	Chr9:22036571-22036691	OrsajCp044	psbF	NA	coding	possible functionality
AzucenaRS1	ONG0300560	Chr3:27764308-27764727	Chr3:27764597-27764717	OrsajCp044	psbF	NA	coding	possible functionality
AzucenaRS1	ONG0200320	Chr2:14415137-14465127	Chr2:14436275-14436395	OrsajCp044	psbF	NA	coding	possible functionality
AzucenaRS1	ONG0101010	Chr1:38938198-38941759	Chr1:38938626-38938746	OrsajCp044	psbF	NA	coding	possible functionality
AzucenaRS1	ONG1200160	Chr12:5565442-5614888	Chr12:5595771-5595891	OrsajCp044	psbF	NA	coding	possible functionality
AzucenaRS1	ONG0700550	Chr7:21946233-21948190	Chr7:21947920-21948040	OrsajCp044	psbF	NA	coding	possible functionality
AzucenaRS1	ONG0300560	Chr3:27764308-27764727	Chr3:27764335-27764587	OrsajCp045	psbE	NA	coding	possible functionality
AzucenaRS1	ONG0101010	Chr1:38938198-38941759	Chr1:38938364-38938616	OrsajCp045	psbE	NA	coding	possible functionality
AzucenaRS1	ONG1200160	Chr12:5565442-5614888	Chr12:5595901-5596153	OrsajCp045	psbE	NA	coding	possible functionality
AzucenaRS1	ONG1000620	Chr10:21676258-21685243	Chr10:21678556-21678808	OrsajCp045	psbE	NA	coding	possible functionality
AzucenaRS1	ONG0700550	Chr7:21946233-21948190	Chr7:21947658-21947910	OrsajCp045	psbE	NA	coding	possible functionality
AzucenaRS1	ONG1200160	Chr12:5565442-5614888	Chr12:5597348-5597444	OrsajCp046	petL	NA	coding	possible functionality
AzucenaRS1	ONG1200090	Chr12:4456256-4459268	Chr12:4456320-4456415	OrsajCp046	petL	NA	coding	truncated
AzucenaRS1	ONG1000620	Chr10:21676258-21685243	Chr10:21677264-21677360	OrsajCp046	petL	NA	coding	possible functionality
AzucenaRS1	ONG0801010	Chr8:21545249-21545578	Chr8:21545280-21545376	OrsajCp046	petL	NA	coding	possible functionality
AzucenaRS1	ONG0700550	Chr7:21946233-21948190	Chr7:21946367-21946463	OrsajCp046	petL	NA	coding	possible functionality
AzucenaRS1	ONG0100530	Chr1:19641222-19643431	Chr1:19642516-19642608	OrsajCp046	petL	NA	coding	truncated
AzucenaRS1	ONG1000620	Chr10:21676258-21685243	Chr10:21676978-21677092	OrsajCp047	petG	NA	coding	possible functionality
AzucenaRS1	ONG0301180	Chr3:21407666-21408091	Chr3:21407810-21407924	OrsajCp047	petG	NA	coding	possible functionality
AzucenaRS1	ONG1200160	Chr12:5565442-5614888	Chr12:5597616-5597730	OrsajCp047	petG	NA	coding	possible functionality
AzucenaRS1	ONG0100530	Chr1:19641222-19643431	Chr1:19642782-19642896	OrsajCp047	petG	NA	coding	possible functionality
AzucenaRS1	ONG1000620	Chr10:21676258-21685243	Chr10:21676788-21676862	OrsajCt143	trnW	NA	non-coding	non-coding
AzucenaRS1	ONG1200160	Chr12:5565442-5614888	Chr12:5597846-5597920	OrsajCt143	trnW	NA	non-coding	non-coding
AzucenaRS1	ONG0100530	Chr1:19641222-19643431	Chr1:19643012-19643086	OrsajCt143	trnW	NA	non-coding	non-coding
AzucenaRS1	ONG1200160	Chr12:5565442-5614888	Chr12:5598046-5598121	OrsajCt144	trnP	NA	non-coding	non-coding
AzucenaRS1	ONG1000620	Chr10:21676258-21685243	Chr10:21676587-21676662	OrsajCt144	trnP	NA	non-coding	non-coding
AzucenaRS1	ONG0100530	Chr1:19641222-19643431	Chr1:19643212-19643287	OrsajCt144	trnP	NA	non-coding	non-coding
AzucenaRS1	ONG1200160	Chr12:5565442-5614888	Chr12:5598439-5598574	OrsajCp048	ORF44	NA	coding	possible functionality
AzucenaRS1	ONG1200160	Chr12:5565442-5614888	Chr12:5599016-5599217	OrsajCp049	RPL33	NA	coding	possible functionality
AzucenaRS1	ONG0800710	Chr8:11937863-11940668	Chr8:11940412-11940613	OrsajCp049	RPL33	NA	coding	possible functionality
AzucenaRS1	ONG1200160	Chr12:5565442-5614888	Chr12:5599458-5599950	OrsajCp050	RPS18	NA	coding	possible functionality
AzucenaRS1	ONG0800710	Chr8:11937863-11940668	Chr8:11939675-11940171	OrsajCp050	RPS18	NA	coding	truncated
AzucenaRS1	ONG1200160	Chr12:5565442-5614888	Chr12:5600172-5600532	OrsajCp051	RPL20	NA	coding	truncated
AzucenaRS1	ONG0800710	Chr8:11937863-11940668	Chr8:11939089-11939453	OrsajCp051	RPL20	NA	coding	truncated
AzucenaRS1	ONG1200160	Chr12:5565442-5614888	Chr12:5601454-5602106	OrsajCp052	clpP	NA	coding	truncated
AzucenaRS1	ONG1200160	Chr12:5565442-5614888	Chr12:5602618-5604144	OrsajCp053	psbB	NA	coding	truncated
AzucenaRS1	ONG1200160	Chr12:5565442-5614888	Chr12:5604308-5604416	OrsajCp054	psbT	NA	coding	possible functionality
AzucenaRS1	ONG0700930	Chr7:22059215-22063375	Chr7:22059290-22059398	OrsajCp054	psbT	NA	coding	possible functionality
AzucenaRS1	ONG0800150	Chr8:3952437-3953027	Chr8:3952776-3952884	OrsajCp054	psbT	NA	coding	possible functionality
AzucenaRS1	ONG1200160	Chr12:5565442-5614888	Chr12:5604464-5604596	OrsajCp055	psbN	NA	coding	possible functionality
AzucenaRS1	ONG0700930	Chr7:22059215-22063375	Chr7:22059429-22059561	OrsajCp055	psbN	NA	coding	possible functionality
AzucenaRS1	ONG1100400	Chr11:14659457-14664642	Chr11:14659893-14660025	OrsajCp055	psbN	NA	coding	possible functionality
AzucenaRS1	ONG1100550	Chr11:19129638-19130027	Chr11:19129835-19129967	OrsajCp055	psbN	NA	coding	possible functionality
AzucenaRS1	ONG0800150	Chr8:3952437-3953027	Chr8:3952596-3952728	OrsajCp055	psbN	NA	coding	possible functionality
AzucenaRS1	ONG1200160	Chr12:5565442-5614888	Chr12:5604699-5604921	OrsajCp056	psbH	NA	coding	possible functionality
AzucenaRS1	ONG0900070	Chr9:2783491-2796914	Chr9:2796589-2796811	OrsajCp056	psbH	NA	coding	possible functionality
AzucenaRS1	ONG0700930	Chr7:22059215-22063375	Chr7:22059664-22059886	OrsajCp056	psbH	NA	coding	possible functionality
AzucenaRS1	ONG0301290	Chr3:16854796-16855955	Chr3:16855268-16855490	OrsajCp056	psbH	NA	coding	possible functionality
AzucenaRS1	ONG0700930	Chr7:22059215-22063375	Chr7:22060015-22061476	OrsajCp057	petB	NA	coding	truncated
AzucenaRS1	ONG1200160	Chr12:5565442-5614888	Chr12:5609837-5611068	OrsajCp058	petD	NA	coding	truncated
AzucenaRS1	ONG0100890	Chr1:34223473-34312493	Chr1:34225063-34226294	OrsajCp058	petD	NA	coding	truncated
AzucenaRS1	ONG0700930	Chr7:22059215-22063375	Chr7:22061667-22062898	OrsajCp058	petD	NA	coding	truncated
AzucenaRS1	ONG1200160	Chr12:5565442-5614888	Chr12:5611287-5612301	OrsajCp059	rpoA	NA	coding	possible functionality
AzucenaRS1	ONG0100890	Chr1:34223473-34312493	Chr1:34226513-34227527	OrsajCp059	rpoA	NA	coding	possible functionality
AzucenaRS1	ONG1200160	Chr12:5565442-5614888	Chr12:5612364-5612796	OrsajCp060	RPS11	NA	coding	possible functionality
AzucenaRS1	ONG0100890	Chr1:34223473-34312493	Chr1:34227590-34228022	OrsajCp060	RPS11	NA	coding	truncated
AzucenaRS1	ONG0900100	Chr9:4630945-4635850	Chr9:4631915-4632348	OrsajCp060	RPS11	NA	coding	truncated
AzucenaRS1	ONG0100890	Chr1:34223473-34312493	Chr1:34228195-34228309	OrsajCp061	RPL36	NA	coding	possible functionality
AzucenaRS1	ONG0300520	Chr3:26704735-26707257	Chr3:26704822-26704936	OrsajCp061	RPL36	NA	coding	possible functionality
AzucenaRS1	ONG1200160	Chr12:5565442-5614888	Chr12:5612968-5613078	OrsajCp061	RPL36	NA	coding	truncated
AzucenaRS1	ONG1200160	Chr12:5565442-5614888	Chr12:5613252-5613576	OrsajCp062	infA	NA	coding	possible functionality
AzucenaRS1	ONG0100890	Chr1:34223473-34312493	Chr1:34228419-34228743	OrsajCp062	infA	NA	coding	possible functionality
AzucenaRS1	ONG0700670	Chr7:27434202-27438832	Chr7:27434274-27434598	OrsajCp062	infA	NA	coding	possible functionality
AzucenaRS1	ONG0300520	Chr3:26704735-26707257	Chr3:26705047-26705371	OrsajCp062	infA	NA	coding	possible functionality
AzucenaRS1	ONG0500440	Chr5:20653055-20656446	Chr5:20653160-20653484	OrsajCp062	infA	NA	coding	truncated
AzucenaRS1	ONG1200160	Chr12:5565442-5614888	Chr12:5613712-5614123	OrsajCp063	RPS8	NA	coding	possible functionality
AzucenaRS1	ONG0100890	Chr1:34223473-34312493	Chr1:34228879-34229290	OrsajCp063	RPS8	NA	coding	possible functionality
AzucenaRS1	ONG0900310	Chr9:12096889-12102247	Chr9:12101701-12102112	OrsajCp063	RPS8	NA	coding	possible functionality
AzucenaRS1	ONG0700670	Chr7:27434202-27438832	Chr7:27434734-27435145	OrsajCp063	RPS8	NA	coding	possible functionality
AzucenaRS1	ONG0500440	Chr5:20653055-20656446	Chr5:20653598-20654009	OrsajCp063	RPS8	NA	coding	possible functionality
AzucenaRS1	ONG0300520	Chr3:26704735-26707257	Chr3:26705506-26705917	OrsajCp063	RPS8	NA	coding	truncated
AzucenaRS1	ONG1200160	Chr12:5565442-5614888	Chr12:5614262-5614634	OrsajCp064	RPL14	NA	coding	possible functionality
AzucenaRS1	ONG1000870	Chr10:8996935-9036133	Chr10:9021679-9022051	OrsajCp064	RPL14	NA	coding	possible functionality
AzucenaRS1	ONG0101580	Chr1:26393644-26435187	Chr1:26425735-26426107	OrsajCp064	RPL14	NA	coding	possible functionality
AzucenaRS1	ONG0100890	Chr1:34223473-34312493	Chr1:34229429-34229801	OrsajCp064	RPL14	NA	coding	possible functionality
AzucenaRS1	ONG0700670	Chr7:27434202-27438832	Chr7:27435284-27435656	OrsajCp064	RPL14	NA	coding	possible functionality
AzucenaRS1	ONG0900310	Chr9:12096889-12102247	Chr9:12101190-12101562	OrsajCp064	RPL14	NA	coding	possible functionality
AzucenaRS1	ONG0500440	Chr5:20653055-20656446	Chr5:20654148-20654519	OrsajCp064	RPL14	NA	coding	truncated
AzucenaRS1	ONG1000870	Chr10:8996935-9036133	Chr10:9020104-9021570	OrsajCp065	RPL16	NA	coding	truncated
AzucenaRS1	ONG0101580	Chr1:26393644-26435187	Chr1:26424165-26425626	OrsajCp065	RPL16	NA	coding	truncated
AzucenaRS1	ONG0700670	Chr7:27434202-27438832	Chr7:27435765-27437224	OrsajCp065	RPL16	NA	coding	truncated
AzucenaRS1	ONG0500440	Chr5:20653055-20656446	Chr5:20654629-20656087	OrsajCp065	RPL16	NA	coding	truncated
AzucenaRS1	ONG0900310	Chr9:12096889-12102247	Chr9:12099635-12101080	OrsajCp065	RPL16	NA	coding	truncated
AzucenaRS1	ONG1000870	Chr10:8996935-9036133	Chr10:9019239-9019959	OrsajCp066	RPS3	NA	coding	possible functionality
AzucenaRS1	ONG0401290	Chr4:9274402-9276819	Chr4:9275782-9276502	OrsajCp066	RPS3	NA	coding	possible functionality
AzucenaRS1	ONG0101580	Chr1:26393644-26435187	Chr1:26405584-26406304	OrsajCp066	RPS3	NA	coding	possible functionality
AzucenaRS1	ONG0101580	Chr1:26393644-26435187	Chr1:26423300-26424020	OrsajCp066	RPS3	NA	coding	possible functionality
AzucenaRS1	ONG0700670	Chr7:27434202-27438832	Chr7:27437369-27438090	OrsajCp066	RPS3	NA	coding	truncated
AzucenaRS1	ONG0900310	Chr9:12096889-12102247	Chr9:12098770-12099490	OrsajCp066	RPS3	NA	coding	truncated
AzucenaRS1	ONG1000870	Chr10:8996935-9036133	Chr10:9018735-9019185	OrsajCp067	RPL22	NA	coding	possible functionality
AzucenaRS1	ONG0101580	Chr1:26393644-26435187	Chr1:26406358-26406808	OrsajCp067	RPL22	NA	coding	possible functionality
AzucenaRS1	ONG0101580	Chr1:26393644-26435187	Chr1:26422796-26423246	OrsajCp067	RPL22	NA	coding	possible functionality
AzucenaRS1	ONG0700670	Chr7:27434202-27438832	Chr7:27438144-27438594	OrsajCp067	RPL22	NA	coding	possible functionality
AzucenaRS1	ONG0900310	Chr9:12096889-12102247	Chr9:12098269-12098717	OrsajCp067	RPL22	NA	coding	truncated
AzucenaRS1	ONG1200500	Chr12:18704459-18704936	Chr12:18704497-18704936	OrsajCp067	RPL22	NA	coding	truncated
AzucenaRS1	ONG1000870	Chr10:8996935-9036133	Chr10:9018140-9018389	OrsajCp068	ORF82	NA	coding	possible functionality
AzucenaRS1	ONG1000500	Chr10:23065012-23067714	Chr10:23066437-23066686	OrsajCp068	ORF82	NA	coding	possible functionality
AzucenaRS1	ONG0801050	Chr8:17601092-17672113	Chr8:17653933-17654182	OrsajCp068	ORF82	NA	coding	possible functionality
AzucenaRS1	ONG0800690	Chr8:23014317-23019542	Chr8:23017818-23018067	OrsajCp068	ORF82	NA	coding	possible functionality
AzucenaRS1	ONG0801050	Chr8:17601092-17672113	Chr8:17636204-17636453	OrsajCp068	ORF82	NA	coding	possible functionality
AzucenaRS1	ONG0301370	Chr3:6456251-6490442	Chr3:6468370-6468619	OrsajCp068	ORF82	NA	coding	possible functionality
AzucenaRS1	ONG0101580	Chr1:26393644-26435187	Chr1:26422201-26422450	OrsajCp068	ORF82	NA	coding	possible functionality
AzucenaRS1	ONG0900310	Chr9:12096889-12102247	Chr9:12097674-12097924	OrsajCp068	ORF82	NA	coding	truncated
AzucenaRS1	ONG0400650	Chr4:22218500-22242217	Chr4:22236237-22236486	OrsajCp068	ORF82	NA	coding	possible functionality
AzucenaRS1	ONG1200350	Chr12:11253067-11258538	Chr12:11257424-11257674	OrsajCp068	ORF82	NA	coding	truncated
AzucenaRS1	ONG0600600	Chr6:23830679-23834933	Chr6:23834581-23834818	OrsajCp068	ORF82	NA	coding	truncated
AzucenaRS1	ONG1000870	Chr10:8996935-9036133	Chr10:9018179-9018254	OrsajCt145	trnH	NA	non-coding	non-coding
AzucenaRS1	ONG1000500	Chr10:23065012-23067714	Chr10:23066572-23066647	OrsajCt145	trnH	NA	non-coding	non-coding
AzucenaRS1	ONG0900310	Chr9:12096889-12102247	Chr9:12097713-12097788	OrsajCt145	trnH	NA	non-coding	non-coding
AzucenaRS1	ONG0801050	Chr8:17601092-17672113	Chr8:17653972-17654047	OrsajCt145	trnH	NA	non-coding	non-coding
AzucenaRS1	ONG0800690	Chr8:23014317-23019542	Chr8:23017953-23018028	OrsajCt145	trnH	NA	non-coding	non-coding
AzucenaRS1	ONG0801050	Chr8:17601092-17672113	Chr8:17636243-17636318	OrsajCt145	trnH	NA	non-coding	non-coding
AzucenaRS1	ONG0301370	Chr3:6456251-6490442	Chr3:6468505-6468580	OrsajCt145	trnH	NA	non-coding	non-coding
AzucenaRS1	ONG0300230	Chr3:14093358-14102636	Chr3:14098334-14098409	OrsajCt145	trnH	NA	non-coding	non-coding
AzucenaRS1	ONG0101580	Chr1:26393644-26435187	Chr1:26422240-26422315	OrsajCt145	trnH	NA	non-coding	non-coding
AzucenaRS1	ONG1200350	Chr12:11253067-11258538	Chr12:11257560-11257635	OrsajCt145	trnH	NA	non-coding	non-coding
AzucenaRS1	ONG1100060	Chr11:3555598-3555707	Chr11:3555625-3555698	OrsajCt145	trnH	NA	non-coding	non-coding
AzucenaRS1	ONG0400650	Chr4:22218500-22242217	Chr4:22236372-22236447	OrsajCt145	trnH	NA	non-coding	non-coding
AzucenaRS1	ONG1000870	Chr10:8996935-9036133	Chr10:9016639-9018124	OrsajCp069	RPL2	NA	coding	truncated
AzucenaRS1	ONG0801050	Chr8:17601092-17672113	Chr8:17652432-17653917	OrsajCp069	RPL2	NA	coding	truncated
AzucenaRS1	ONG0800690	Chr8:23014317-23019542	Chr8:23018083-23019542	OrsajCp069	RPL2	NA	coding	truncated
AzucenaRS1	ONG0801050	Chr8:17601092-17672113	Chr8:17634703-17636188	OrsajCp069	RPL2	NA	coding	truncated
AzucenaRS1	ONG0301370	Chr3:6456251-6490442	Chr3:6468635-6470120	OrsajCp069	RPL2	NA	coding	truncated
AzucenaRS1	ONG0301320	Chr3:21111698-21115539	Chr3:21113971-21115456	OrsajCp069	RPL2	NA	coding	truncated
AzucenaRS1	ONG0301320	Chr3:21193447-21197294	Chr3:21195726-21197211	OrsajCp069	RPL2	NA	coding	truncated
AzucenaRS1	ONG0101580	Chr1:26393644-26435187	Chr1:26420700-26422185	OrsajCp069	RPL2	NA	coding	truncated
AzucenaRS1	ONG0400650	Chr4:22218500-22242217	Chr4:22236502-22237983	OrsajCp069	RPL2	NA	coding	truncated
AzucenaRS1	ONG1000870	Chr10:8996935-9036133	Chr10:9017604-9018018	OrsajCp070	ORF137	NA	coding	possible functionality
AzucenaRS1	ONG1000500	Chr10:23065012-23067714	Chr10:23066807-23067221	OrsajCp070	ORF137	NA	coding	possible functionality
AzucenaRS1	ONG0801050	Chr8:17601092-17672113	Chr8:17653397-17653811	OrsajCp070	ORF137	NA	coding	possible functionality
AzucenaRS1	ONG0800690	Chr8:23014317-23019542	Chr8:23018189-23018603	OrsajCp070	ORF137	NA	coding	possible functionality
AzucenaRS1	ONG0801050	Chr8:17601092-17672113	Chr8:17635668-17636082	OrsajCp070	ORF137	NA	coding	possible functionality
AzucenaRS1	ONG0301370	Chr3:6456251-6490442	Chr3:6468741-6469155	OrsajCp070	ORF137	NA	coding	possible functionality
AzucenaRS1	ONG0301320	Chr3:21193447-21197294	Chr3:21196691-21197105	OrsajCp070	ORF137	NA	coding	possible functionality
AzucenaRS1	ONG0301320	Chr3:21111698-21115539	Chr3:21114936-21115350	OrsajCp070	ORF137	NA	coding	possible functionality
AzucenaRS1	ONG0101580	Chr1:26393644-26435187	Chr1:26421665-26422079	OrsajCp070	ORF137	NA	coding	possible functionality
AzucenaRS1	ONG0400650	Chr4:22218500-22242217	Chr4:22236608-22237022	OrsajCp070	ORF137	NA	coding	possible functionality
AzucenaRS1	ONG1200350	Chr12:11253067-11258538	Chr12:11257796-11258210	OrsajCp070	ORF137	NA	coding	possible functionality
AzucenaRS1	ONG0900310	Chr9:12096889-12102247	Chr9:12097139-12097553	OrsajCp070	ORF137	NA	coding	truncated
AzucenaRS1	ONG1000870	Chr10:8996935-9036133	Chr10:9016339-9016621	OrsajCp071	RPL23	NA	coding	possible functionality
AzucenaRS1	ONG1000560	Chr10:24490249-24493255	Chr10:24491373-24491655	OrsajCp071	RPL23	NA	coding	possible functionality
AzucenaRS1	ONG0801050	Chr8:17601092-17672113	Chr8:17652132-17652414	OrsajCp071	RPL23	NA	coding	possible functionality
AzucenaRS1	ONG0801050	Chr8:17601092-17672113	Chr8:17634403-17634685	OrsajCp071	RPL23	NA	coding	possible functionality
AzucenaRS1	ONG0301370	Chr3:6456251-6490442	Chr3:6470138-6470420	OrsajCp071	RPL23	NA	coding	possible functionality
AzucenaRS1	ONG0301320	Chr3:21193447-21197294	Chr3:21195426-21195708	OrsajCp071	RPL23	NA	coding	possible functionality
AzucenaRS1	ONG0301320	Chr3:21111698-21115539	Chr3:21113672-21113953	OrsajCp071	RPL23	NA	coding	truncated
AzucenaRS1	ONG0101580	Chr1:26393644-26435187	Chr1:26420400-26420682	OrsajCp071	RPL23	NA	coding	possible functionality
AzucenaRS1	ONG0100770	Chr1:29098396-29098735	Chr1:29098460-29098735	OrsajCp071	RPL23	NA	coding	truncated
AzucenaRS1	ONG0401250	Chr4:3658884-3659652	Chr4:3659354-3659636	OrsajCp071	RPL23	NA	coding	possible functionality
AzucenaRS1	ONG0400650	Chr4:22218500-22242217	Chr4:22238005-22238287	OrsajCp071	RPL23	NA	coding	possible functionality
AzucenaRS1	ONG1000870	Chr10:8996935-9036133	Chr10:9016091-9016165	OrsajCt146	trnI	NA	non-coding	non-coding
AzucenaRS1	ONG1000560	Chr10:24490249-24493255	Chr10:24491829-24491903	OrsajCt146	trnI	NA	non-coding	non-coding
AzucenaRS1	ONG0801050	Chr8:17601092-17672113	Chr8:17651884-17651958	OrsajCt146	trnI	NA	non-coding	non-coding
AzucenaRS1	ONG0801050	Chr8:17601092-17672113	Chr8:17634155-17634229	OrsajCt146	trnI	NA	non-coding	non-coding
AzucenaRS1	ONG0401250	Chr4:3658884-3659652	Chr4:3659106-3659180	OrsajCt146	trnI	NA	non-coding	non-coding
AzucenaRS1	ONG0400650	Chr4:22218500-22242217	Chr4:22238461-22238535	OrsajCt146	trnI	NA	non-coding	non-coding
AzucenaRS1	ONG0301370	Chr3:6456251-6490442	Chr3:6470594-6470668	OrsajCt146	trnI	NA	non-coding	non-coding
AzucenaRS1	ONG0301320	Chr3:21111698-21115539	Chr3:21113425-21113499	OrsajCt146	trnI	NA	non-coding	non-coding
AzucenaRS1	ONG0301320	Chr3:21193447-21197294	Chr3:21195179-21195253	OrsajCt146	trnI	NA	non-coding	non-coding
AzucenaRS1	ONG0101580	Chr1:26393644-26435187	Chr1:26420152-26420226	OrsajCt146	trnI	NA	non-coding	non-coding
AzucenaRS1	ONG1000870	Chr10:8996935-9036133	Chr10:9015683-9015770	OrsajCp072	ORF28	NA	coding	possible functionality
AzucenaRS1	ONG1000560	Chr10:24490249-24493255	Chr10:24492224-24492311	OrsajCp072	ORF28	NA	coding	possible functionality
AzucenaRS1	ONG0801050	Chr8:17601092-17672113	Chr8:17633747-17633834	OrsajCp072	ORF28	NA	coding	possible functionality
AzucenaRS1	ONG0801050	Chr8:17601092-17672113	Chr8:17651476-17651563	OrsajCp072	ORF28	NA	coding	possible functionality
AzucenaRS1	ONG0401240	Chr4:3513181-3518510	Chr4:3513286-3513373	OrsajCp072	ORF28	NA	coding	possible functionality
AzucenaRS1	ONG0400650	Chr4:22218500-22242217	Chr4:22238856-22238943	OrsajCp072	ORF28	NA	coding	possible functionality
AzucenaRS1	ONG0301370	Chr3:6456251-6490442	Chr3:6470989-6471076	OrsajCp072	ORF28	NA	coding	possible functionality
AzucenaRS1	ONG0301320	Chr3:21193447-21197294	Chr3:21194771-21194858	OrsajCp072	ORF28	NA	coding	possible functionality
AzucenaRS1	ONG0301320	Chr3:21111698-21115539	Chr3:21113017-21113104	OrsajCp072	ORF28	NA	coding	possible functionality
AzucenaRS1	ONG0101580	Chr1:26393644-26435187	Chr1:26419744-26419831	OrsajCp072	ORF28	NA	coding	possible functionality
AzucenaRS1	ONG0101580	Chr1:26393644-26435187	Chr1:26430027-26430114	OrsajCp072	ORF28	NA	coding	possible functionality
AzucenaRS1	ONG0200380	Chr2:16132946-16133261	Chr2:16133143-16133227	OrsajCp072	ORF28	NA	coding	truncated
AzucenaRS1	ONG0500070	Chr5:2869655-2869947	Chr5:2869685-2869771	OrsajCp072	ORF28	NA	coding	truncated
AzucenaRS1	ONG1000870	Chr10:8996935-9036133	Chr10:9014557-9015307	OrsajCp074	ORF249	NA	coding	possible functionality
AzucenaRS1	ONG0301370	Chr3:6456251-6490442	Chr3:6471452-6472202	OrsajCp074	ORF249	NA	coding	possible functionality
AzucenaRS1	ONG0301320	Chr3:21111698-21115539	Chr3:21111894-21112641	OrsajCp074	ORF249	NA	coding	truncated
AzucenaRS1	ONG0301320	Chr3:21193447-21197294	Chr3:21193646-21194395	OrsajCp074	ORF249	NA	coding	truncated
AzucenaRS1	ONG0101580	Chr1:26393644-26435187	Chr1:26428901-26429651	OrsajCp074	ORF249	NA	coding	possible functionality
AzucenaRS1	ONG0101580	Chr1:26393644-26435187	Chr1:26418618-26419368	OrsajCp074	ORF249	NA	coding	possible functionality
AzucenaRS1	ONG0401240	Chr4:3513181-3518510	Chr4:3513749-3514499	OrsajCp074	ORF249	NA	coding	truncated
AzucenaRS1	ONG0500620	Chr5:13334389-13365293	Chr5:13364419-13365169	OrsajCp074	ORF249	NA	coding	possible functionality
AzucenaRS1	ONG1000870	Chr10:8996935-9036133	Chr10:9014512-9014593	OrsajCt147	trnL	NA	non-coding	non-coding
AzucenaRS1	ONG0500620	Chr5:13334389-13365293	Chr5:13364374-13364455	OrsajCt147	trnL	NA	non-coding	non-coding
AzucenaRS1	ONG0401240	Chr4:3513181-3518510	Chr4:3514463-3514544	OrsajCt147	trnL	NA	non-coding	non-coding
AzucenaRS1	ONG0301370	Chr3:6456251-6490442	Chr3:6472166-6472247	OrsajCt147	trnL	NA	non-coding	non-coding
AzucenaRS1	ONG0301320	Chr3:21111698-21115539	Chr3:21111849-21111930	OrsajCt147	trnL	NA	non-coding	non-coding
AzucenaRS1	ONG0301320	Chr3:21193447-21197294	Chr3:21193601-21193682	OrsajCt147	trnL	NA	non-coding	non-coding
AzucenaRS1	ONG0300960	Chr3:38005325-38006875	Chr3:38005955-38006033	OrsajCt147	trnL	NA	non-coding	non-coding
AzucenaRS1	ONG0200320	Chr2:14415137-14465127	Chr2:14431246-14431327	OrsajCt147	trnL	NA	non-coding	non-coding
AzucenaRS1	ONG0101580	Chr1:26393644-26435187	Chr1:26418573-26418654	OrsajCt147	trnL	NA	non-coding	non-coding
AzucenaRS1	ONG0101580	Chr1:26393644-26435187	Chr1:26428856-26428937	OrsajCt147	trnL	NA	non-coding	non-coding
AzucenaRS1	ONG0600130	Chr6:7252135-7252549	Chr6:7252154-7252234	OrsajCt147	trnL	NA	non-coding	non-coding
AzucenaRS1	ONG0900170	Chr9:7107882-7108254	Chr9:7108002-7108081	OrsajCt147	trnL	NA	non-coding	non-coding
AzucenaRS1	ONG1000870	Chr10:8996935-9036133	Chr10:9011664-9013909	OrsajCp075	ndhB	NA	coding	truncated
AzucenaRS1	ONG0301370	Chr3:6456251-6490442	Chr3:6472850-6475095	OrsajCp075	ndhB	NA	coding	truncated
AzucenaRS1	ONG0500620	Chr5:13334389-13365293	Chr5:13361526-13363771	OrsajCp075	ndhB	NA	coding	truncated
AzucenaRS1	ONG0400490	Chr4:17518168-17523305	Chr4:17518168-17520334	OrsajCp075	ndhB	NA	coding	truncated
AzucenaRS1	ONG1000870	Chr10:8996935-9036133	Chr10:9010894-9011365	OrsajCp076	RPS7	NA	coding	possible functionality
AzucenaRS1	ONG0401240	Chr4:3513181-3518510	Chr4:3517659-3518130	OrsajCp076	RPS7	NA	coding	possible functionality
AzucenaRS1	ONG0400490	Chr4:17518168-17523305	Chr4:17520633-17521104	OrsajCp076	RPS7	NA	coding	truncated
AzucenaRS1	ONG0301370	Chr3:6456251-6490442	Chr3:6475394-6475865	OrsajCp076	RPS7	NA	coding	possible functionality
AzucenaRS1	ONG0201190	Chr2:5647393-5666152	Chr2:5648603-5649074	OrsajCp076	RPS7	NA	coding	possible functionality
AzucenaRS1	ONG0200320	Chr2:14415137-14465127	Chr2:14417830-14418301	OrsajCp076	RPS7	NA	coding	possible functionality
AzucenaRS1	ONG0101580	Chr1:26393644-26435187	Chr1:26402684-26403155	OrsajCp076	RPS7	NA	coding	possible functionality
AzucenaRS1	ONG1000870	Chr10:8996935-9036133	Chr10:9008866-9009083	OrsajCp077	ORF72	NA	coding	truncated
AzucenaRS1	ONG1000800	Chr10:4567747-4590186	Chr10:4573060-4573277	OrsajCp077	ORF72	NA	coding	truncated
AzucenaRS1	ONG0301370	Chr3:6456251-6490442	Chr3:6477677-6477894	OrsajCp077	ORF72	NA	coding	truncated
AzucenaRS1	ONG0500030	Chr5:904138-906728	Chr5:906295-906512	OrsajCp077	ORF72	NA	coding	truncated
AzucenaRS1	ONG0500620	Chr5:13334389-13365293	Chr5:13355128-13355344	OrsajCp077	ORF72	NA	coding	truncated
AzucenaRS1	ONG0400490	Chr4:17518168-17523305	Chr4:17522913-17523130	OrsajCp077	ORF72	NA	coding	truncated
AzucenaRS1	ONG0200320	Chr2:14415137-14465127	Chr2:14420112-14420329	OrsajCp077	ORF72	NA	coding	truncated
AzucenaRS1	ONG0200010	Chr2:815353-826250	Chr2:820776-820992	OrsajCp077	ORF72	NA	coding	truncated
AzucenaRS1	ONG1000870	Chr10:8996935-9036133	Chr10:9008649-9008807	OrsajCp078	ORF85	NA	coding	truncated
AzucenaRS1	ONG1000800	Chr10:4567747-4590186	Chr10:4573336-4573494	OrsajCp078	ORF85	NA	coding	truncated
AzucenaRS1	ONG0500030	Chr5:904138-906728	Chr5:906078-906236	OrsajCp078	ORF85	NA	coding	truncated
AzucenaRS1	ONG0500620	Chr5:13334389-13365293	Chr5:13354911-13355069	OrsajCp078	ORF85	NA	coding	truncated
AzucenaRS1	ONG0301370	Chr3:6456251-6490442	Chr3:6477953-6478111	OrsajCp078	ORF85	NA	coding	truncated
AzucenaRS1	ONG0200320	Chr2:14415137-14465127	Chr2:14420388-14420546	OrsajCp078	ORF85	NA	coding	truncated
AzucenaRS1	ONG0200010	Chr2:815353-826250	Chr2:820558-820716	OrsajCp078	ORF85	NA	coding	truncated
AzucenaRS1	ONG1200300	Chr12:9068072-9071775	Chr12:9071577-9071736	OrsajCp078	ORF85	NA	coding	truncated
AzucenaRS1	ONG1000800	Chr10:4567747-4590186	Chr10:4573830-4573902	OrsajCt148	trnV	NA	non-coding	non-coding
AzucenaRS1	ONG1000870	Chr10:8996935-9036133	Chr10:9008241-9008313	OrsajCt148	trnV	NA	non-coding	non-coding
AzucenaRS1	ONG0500620	Chr5:13334389-13365293	Chr5:13354503-13354575	OrsajCt148	trnV	NA	non-coding	non-coding
AzucenaRS1	ONG0500030	Chr5:904138-906728	Chr5:905670-905742	OrsajCt148	trnV	NA	non-coding	non-coding
AzucenaRS1	ONG0301370	Chr3:6456251-6490442	Chr3:6478447-6478519	OrsajCt148	trnV	NA	non-coding	non-coding
AzucenaRS1	ONG0300950	Chr3:37673868-37676307	Chr3:37675688-37675760	OrsajCt148	trnV	NA	non-coding	non-coding
AzucenaRS1	ONG0200010	Chr2:815353-826250	Chr2:820143-820215	OrsajCt148	trnV	NA	non-coding	non-coding
AzucenaRS1	ONG0200320	Chr2:14415137-14465127	Chr2:14420882-14420954	OrsajCt148	trnV	NA	non-coding	non-coding
AzucenaRS1	ONG0101580	Chr1:26393644-26435187	Chr1:26410397-26410469	OrsajCt148	trnV	NA	non-coding	non-coding
AzucenaRS1	ONG0101400	Chr1:19230963-19231295	Chr1:19231175-19231247	OrsajCt148	trnV	NA	non-coding	non-coding
AzucenaRS1	ONG1000870	Chr10:8996935-9036133	Chr10:9006519-9008010	OrsajCr113	OrsajCr113	NA	non-coding	non-coding
AzucenaRS1	ONG0101490	Chr1:5088002-5102336	Chr1:5088247-5089738	OrsajCr113	OrsajCr113	NA	non-coding	non-coding
AzucenaRS1	ONG0101580	Chr1:26393644-26435187	Chr1:26410700-26412191	OrsajCr113	OrsajCr113	NA	non-coding	non-coding
AzucenaRS1	ONG0200320	Chr2:14415137-14465127	Chr2:14421185-14422676	OrsajCr113	OrsajCr113	NA	non-coding	non-coding
AzucenaRS1	ONG1000870	Chr10:8996935-9036133	Chr10:9005189-9006209	OrsajCt149	OrsajCt149	NA	non-coding	non-coding
AzucenaRS1	ONG1000800	Chr10:4567747-4590186	Chr10:4589014-4590033	OrsajCt149	OrsajCt149	NA	non-coding	non-coding
AzucenaRS1	ONG0101490	Chr1:5088002-5102336	Chr1:5090050-5091067	OrsajCt149	OrsajCt149	NA	non-coding	non-coding
AzucenaRS1	ONG0101580	Chr1:26393644-26435187	Chr1:26412500-26413518	OrsajCt149	OrsajCt149	NA	non-coding	non-coding
AzucenaRS1	ONG0200320	Chr2:14415137-14465127	Chr2:14422985-14424009	OrsajCt149	OrsajCt149	NA	non-coding	non-coding
AzucenaRS1	ONG0500620	Chr5:13334389-13365293	Chr5:13340035-13341058	OrsajCt149	OrsajCt149	NA	non-coding	non-coding
AzucenaRS1	ONG1000800	Chr10:4567747-4590186	Chr10:4589490-4589892	OrsajCp079	ORF133	NA	coding	possible functionality
AzucenaRS1	ONG1000870	Chr10:8996935-9036133	Chr10:9005665-9006068	OrsajCp079	ORF133	NA	coding	truncated
AzucenaRS1	ONG0101580	Chr1:26393644-26435187	Chr1:26412641-26413042	OrsajCp079	ORF133	NA	coding	truncated
AzucenaRS1	ONG0101490	Chr1:5088002-5102336	Chr1:5090191-5090591	OrsajCp079	ORF133	NA	coding	truncated
AzucenaRS1	ONG1200960	Chr12:11827968-11830192	Chr12:11829463-11829868	OrsajCp079	ORF133	NA	coding	truncated
AzucenaRS1	ONG0500620	Chr5:13334389-13365293	Chr5:13340511-13340917	OrsajCp079	ORF133	NA	coding	truncated
AzucenaRS1	ONG0200320	Chr2:14415137-14465127	Chr2:14423126-14423533	OrsajCp079	ORF133	NA	coding	truncated
AzucenaRS1	ONG1000870	Chr10:8996935-9036133	Chr10:9004241-9005125	OrsajCt150	OrsajCt150	NA	non-coding	non-coding
AzucenaRS1	ONG1000800	Chr10:4567747-4590186	Chr10:4588069-4588950	OrsajCt150	OrsajCt150	NA	non-coding	non-coding
AzucenaRS1	ONG0101580	Chr1:26393644-26435187	Chr1:26413582-26414466	OrsajCt150	OrsajCt150	NA	non-coding	non-coding
AzucenaRS1	ONG0101490	Chr1:5088002-5102336	Chr1:5091131-5092015	OrsajCt150	OrsajCt150	NA	non-coding	non-coding
AzucenaRS1	ONG0200320	Chr2:14415137-14465127	Chr2:14424073-14424957	OrsajCt150	OrsajCt150	NA	non-coding	non-coding
AzucenaRS1	ONG0500620	Chr5:13334389-13365293	Chr5:13339087-13339971	OrsajCt150	OrsajCt150	NA	non-coding	non-coding
AzucenaRS1	ONG1000870	Chr10:8996935-9036133	Chr10:9004296-9004626	OrsajCp080	ORF109	NA	coding	truncated
AzucenaRS1	ONG1000800	Chr10:4567747-4590186	Chr10:4588124-4588451	OrsajCp080	ORF109	NA	coding	truncated
AzucenaRS1	ONG0200320	Chr2:14415137-14465127	Chr2:14424572-14424902	OrsajCp080	ORF109	NA	coding	truncated
AzucenaRS1	ONG0101580	Chr1:26393644-26435187	Chr1:26394036-26394366	OrsajCp080	ORF109	NA	coding	truncated
AzucenaRS1	ONG0101580	Chr1:26393644-26435187	Chr1:26414081-26414411	OrsajCp080	ORF109	NA	coding	truncated
AzucenaRS1	ONG0101490	Chr1:5088002-5102336	Chr1:5091630-5091960	OrsajCp080	ORF109	NA	coding	truncated
AzucenaRS1	ONG0500620	Chr5:13334389-13365293	Chr5:13339142-13339472	OrsajCp080	ORF109	NA	coding	truncated
AzucenaRS1	ONG0801050	Chr8:17601092-17672113	Chr8:17607704-17608034	OrsajCp080	ORF109	NA	coding	truncated
AzucenaRS1	ONG0101580	Chr1:26393644-26435187	Chr1:26394566-26397454	OrsajCr114	OrsajCr114	NA	non-coding	non-coding
AzucenaRS1	ONG0101490	Chr1:5088002-5102336	Chr1:5092160-5095048	OrsajCr114	OrsajCr114	NA	non-coding	non-coding
AzucenaRS1	ONG0101580	Chr1:26393644-26435187	Chr1:26414611-26417498	OrsajCr114	OrsajCr114	NA	non-coding	non-coding
AzucenaRS1	ONG0801020	Chr8:21864579-21868641	Chr8:21865142-21868030	OrsajCr114	OrsajCr114	NA	non-coding	non-coding
AzucenaRS1	ONG0801050	Chr8:17601092-17672113	Chr8:17601640-17604475	OrsajCr114	OrsajCr114	NA	non-coding	non-coding
AzucenaRS1	ONG1000800	Chr10:4567747-4590186	Chr10:4585055-4587924	OrsajCr114	OrsajCr114	NA	non-coding	non-coding
AzucenaRS1	ONG1200160	Chr12:5565442-5614888	Chr12:5590296-5590391	OrsajCr115	OrsajCr115	NA	non-coding	non-coding
AzucenaRS1	ONG1000800	Chr10:4567747-4590186	Chr10:4581538-4581633	OrsajCr115	OrsajCr115	NA	non-coding	non-coding
AzucenaRS1	ONG1000870	Chr10:8996935-9036133	Chr10:9001087-9001182	OrsajCr115	OrsajCr115	NA	non-coding	non-coding
AzucenaRS1	ONG0300260	Chr3:14530647-14532886	Chr3:14532739-14532834	OrsajCr115	OrsajCr115	NA	non-coding	non-coding
AzucenaRS1	ONG0101490	Chr1:5088002-5102336	Chr1:5095143-5095238	OrsajCr115	OrsajCr115	NA	non-coding	non-coding
AzucenaRS1	ONG0101580	Chr1:26393644-26435187	Chr1:26397549-26397644	OrsajCr115	OrsajCr115	NA	non-coding	non-coding
AzucenaRS1	ONG0101580	Chr1:26393644-26435187	Chr1:26417593-26417688	OrsajCr115	OrsajCr115	NA	non-coding	non-coding
AzucenaRS1	ONG0100890	Chr1:34223473-34312493	Chr1:34311091-34311186	OrsajCr115	OrsajCr115	NA	non-coding	non-coding
AzucenaRS1	ONG0801050	Chr8:17601092-17672113	Chr8:17601450-17601545	OrsajCr115	OrsajCr115	NA	non-coding	non-coding
AzucenaRS1	ONG0801020	Chr8:21864579-21868641	Chr8:21864952-21865047	OrsajCr115	OrsajCr115	NA	non-coding	non-coding
AzucenaRS1	ONG0200010	Chr2:815353-826250	Chr2:823449-823544	OrsajCr115	OrsajCr115	NA	non-coding	non-coding
AzucenaRS1	ONG1200160	Chr12:5565442-5614888	Chr12:5589948-5590069	OrsajCr116	OrsajCr116	NA	non-coding	non-coding
AzucenaRS1	ONG1000800	Chr10:4567747-4590186	Chr10:4581190-4581311	OrsajCr116	OrsajCr116	NA	non-coding	non-coding
AzucenaRS1	ONG1000870	Chr10:8996935-9036133	Chr10:9000739-9000860	OrsajCr116	OrsajCr116	NA	non-coding	non-coding
AzucenaRS1	ONG0801020	Chr8:21864579-21868641	Chr8:21864603-21864724	OrsajCr116	OrsajCr116	NA	non-coding	non-coding
AzucenaRS1	ONG0801050	Chr8:17601092-17672113	Chr8:17601102-17601223	OrsajCr116	OrsajCr116	NA	non-coding	non-coding
AzucenaRS1	ONG0300260	Chr3:14530647-14532886	Chr3:14532391-14532512	OrsajCr116	OrsajCr116	NA	non-coding	non-coding
AzucenaRS1	ONG0300150	Chr3:8136955-8137453	Chr3:8137049-8137169	OrsajCr116	OrsajCr116	NA	non-coding	non-coding
AzucenaRS1	ONG0101490	Chr1:5088002-5102336	Chr1:5095465-5095586	OrsajCr116	OrsajCr116	NA	non-coding	non-coding
AzucenaRS1	ONG0101580	Chr1:26393644-26435187	Chr1:26397871-26397992	OrsajCr116	OrsajCr116	NA	non-coding	non-coding
AzucenaRS1	ONG0100890	Chr1:34223473-34312493	Chr1:34311413-34311534	OrsajCr116	OrsajCr116	NA	non-coding	non-coding
AzucenaRS1	ONG0200010	Chr2:815353-826250	Chr2:823772-823893	OrsajCr116	OrsajCr116	NA	non-coding	non-coding
AzucenaRS1	ONG1200160	Chr12:5565442-5614888	Chr12:5589616-5589690	OrsajCt151	OrsajCt151	NA	non-coding	non-coding
AzucenaRS1	ONG1000870	Chr10:8996935-9036133	Chr10:9000407-9000481	OrsajCt151	OrsajCt151	NA	non-coding	non-coding
AzucenaRS1	ONG1000800	Chr10:4567747-4590186	Chr10:4580859-4580933	OrsajCt151	OrsajCt151	NA	non-coding	non-coding
AzucenaRS1	ONG0101490	Chr1:5088002-5102336	Chr1:5095844-5095918	OrsajCt151	OrsajCt151	NA	non-coding	non-coding
AzucenaRS1	ONG0101580	Chr1:26393644-26435187	Chr1:26398250-26398324	OrsajCt151	OrsajCt151	NA	non-coding	non-coding
AzucenaRS1	ONG0100890	Chr1:34223473-34312493	Chr1:34311792-34311866	OrsajCt151	OrsajCt151	NA	non-coding	non-coding
AzucenaRS1	ONG0700470	Chr7:18916435-18916552	Chr7:18916459-18916534	OrsajCt151	OrsajCt151	NA	non-coding	non-coding
AzucenaRS1	ONG0300260	Chr3:14530647-14532886	Chr3:14532061-14532135	OrsajCt151	OrsajCt151	NA	non-coding	non-coding
AzucenaRS1	ONG0200010	Chr2:815353-826250	Chr2:824149-824223	OrsajCt151	OrsajCt151	NA	non-coding	non-coding
AzucenaRS1	ONG1200160	Chr12:5565442-5614888	Chr12:5572509-5572581	OrsajCp081	ORF23	NA	coding	possible functionality
AzucenaRS1	ONG1200160	Chr12:5565442-5614888	Chr12:5589492-5589564	OrsajCp081	ORF23	NA	coding	possible functionality
AzucenaRS1	ONG1000800	Chr10:4567747-4590186	Chr10:4580735-4580807	OrsajCp081	ORF23	NA	coding	possible functionality
AzucenaRS1	ONG1000870	Chr10:8996935-9036133	Chr10:9000283-9000355	OrsajCp081	ORF23	NA	coding	possible functionality
AzucenaRS1	ONG0300260	Chr3:14530647-14532886	Chr3:14531937-14532009	OrsajCp081	ORF23	NA	coding	possible functionality
AzucenaRS1	ONG0200010	Chr2:815353-826250	Chr2:824275-824347	OrsajCp081	ORF23	NA	coding	possible functionality
AzucenaRS1	ONG0101580	Chr1:26393644-26435187	Chr1:26398376-26398448	OrsajCp081	ORF23	NA	coding	possible functionality
AzucenaRS1	ONG0100890	Chr1:34223473-34312493	Chr1:34311918-34311990	OrsajCp081	ORF23	NA	coding	possible functionality
AzucenaRS1	ONG0101490	Chr1:5088002-5102336	Chr1:5095970-5096042	OrsajCp081	ORF23	NA	coding	possible functionality
AzucenaRS1	ONG1200160	Chr12:5565442-5614888	Chr12:5589292-5589364	OrsajCt152	OrsajCt152	NA	non-coding	non-coding
AzucenaRS1	ONG1200160	Chr12:5565442-5614888	Chr12:5572709-5572781	OrsajCt152	OrsajCt152	NA	non-coding	non-coding
AzucenaRS1	ONG1000800	Chr10:4567747-4590186	Chr10:4580535-4580607	OrsajCt152	OrsajCt152	NA	non-coding	non-coding
AzucenaRS1	ONG1000870	Chr10:8996935-9036133	Chr10:9000083-9000155	OrsajCt152	OrsajCt152	NA	non-coding	non-coding
AzucenaRS1	ONG0900660	Chr9:5325564-5355266	Chr9:5355073-5355145	OrsajCt152	OrsajCt152	NA	non-coding	non-coding
AzucenaRS1	ONG0301360	Chr3:5087518-5101484	Chr3:5087644-5087716	OrsajCt152	OrsajCt152	NA	non-coding	non-coding
AzucenaRS1	ONG0300260	Chr3:14530647-14532886	Chr3:14531737-14531809	OrsajCt152	OrsajCt152	NA	non-coding	non-coding
AzucenaRS1	ONG0101490	Chr1:5088002-5102336	Chr1:5096170-5096242	OrsajCt152	OrsajCt152	NA	non-coding	non-coding
AzucenaRS1	ONG0100500	Chr1:19323475-19335868	Chr1:19335262-19335334	OrsajCt152	OrsajCt152	NA	non-coding	non-coding
AzucenaRS1	ONG0101580	Chr1:26393644-26435187	Chr1:26398576-26398648	OrsajCt152	OrsajCt152	NA	non-coding	non-coding
AzucenaRS1	ONG0100890	Chr1:34223473-34312493	Chr1:34312118-34312190	OrsajCt152	OrsajCt152	NA	non-coding	non-coding
AzucenaRS1	ONG0400650	Chr4:22218500-22242217	Chr4:22222008-22222080	OrsajCt152	OrsajCt152	NA	non-coding	non-coding
AzucenaRS1	ONG0200010	Chr2:815353-826250	Chr2:824475-824547	OrsajCt152	OrsajCt152	NA	non-coding	non-coding
AzucenaRS1	ONG1200160	Chr12:5565442-5614888	Chr12:5588181-5588373	OrsajCp082	ORF63	NA	coding	possible functionality
AzucenaRS1	ONG1200160	Chr12:5565442-5614888	Chr12:5573700-5573892	OrsajCp082	ORF63	NA	coding	truncated
AzucenaRS1	ONG1000800	Chr10:4567747-4590186	Chr10:4579424-4579616	OrsajCp082	ORF63	NA	coding	possible functionality
AzucenaRS1	ONG1000870	Chr10:8996935-9036133	Chr10:8998972-8999164	OrsajCp082	ORF63	NA	coding	possible functionality
AzucenaRS1	ONG0101490	Chr1:5088002-5102336	Chr1:5097161-5097353	OrsajCp082	ORF63	NA	coding	possible functionality
AzucenaRS1	ONG0101580	Chr1:26393644-26435187	Chr1:26399568-26399760	OrsajCp082	ORF63	NA	coding	possible functionality
AzucenaRS1	ONG0301290	Chr3:16854796-16855955	Chr3:16855018-16855210	OrsajCp082	ORF63	NA	coding	possible functionality
AzucenaRS1	ONG0300260	Chr3:14530647-14532886	Chr3:14530647-14530831	OrsajCp082	ORF63	NA	coding	truncated
AzucenaRS1	ONG0200010	Chr2:815353-826250	Chr2:825466-825658	OrsajCp082	ORF63	NA	coding	possible functionality
AzucenaRS1	ONG0400650	Chr4:22218500-22242217	Chr4:22220897-22221089	OrsajCp082	ORF63	NA	coding	truncated
AzucenaRS1	ONG1200160	Chr12:5565442-5614888	Chr12:5587488-5587761	OrsajCp083	RPS15	NA	coding	possible functionality
AzucenaRS1	ONG1200160	Chr12:5565442-5614888	Chr12:5574312-5574585	OrsajCp083	RPS15	NA	coding	possible functionality
AzucenaRS1	ONG1000800	Chr10:4567747-4590186	Chr10:4578731-4579004	OrsajCp083	RPS15	NA	coding	possible functionality
AzucenaRS1	ONG1000870	Chr10:8996935-9036133	Chr10:8998279-8998552	OrsajCp083	RPS15	NA	coding	possible functionality
AzucenaRS1	ONG0101490	Chr1:5088002-5102336	Chr1:5097773-5098046	OrsajCp083	RPS15	NA	coding	possible functionality
AzucenaRS1	ONG0400650	Chr4:22218500-22242217	Chr4:22220203-22220477	OrsajCp083	RPS15	NA	coding	truncated
AzucenaRS1	ONG1000870	Chr10:8996935-9036133	Chr10:8997970-8998141	OrsajCp084	ORF56	NA	coding	possible functionality
AzucenaRS1	ONG1000800	Chr10:4567747-4590186	Chr10:4578430-4578593	OrsajCp084	ORF56	NA	coding	truncated
AzucenaRS1	ONG1200160	Chr12:5565442-5614888	Chr12:5574712-5574884	OrsajCp084	ORF56	NA	coding	truncated
AzucenaRS1	ONG1200160	Chr12:5565442-5614888	Chr12:5587187-5587350	OrsajCp084	ORF56	NA	coding	truncated
AzucenaRS1	ONG0101490	Chr1:5088002-5102336	Chr1:5098184-5098347	OrsajCp084	ORF56	NA	coding	truncated
AzucenaRS1	ONG0400650	Chr4:22218500-22242217	Chr4:22219902-22220065	OrsajCp084	ORF56	NA	coding	truncated
AzucenaRS1	ONG1200160	Chr12:5565442-5614888	Chr12:5574917-5577123	OrsajCp085	ndhF	NA	coding	truncated
AzucenaRS1	ONG1200160	Chr12:5565442-5614888	Chr12:5577812-5578008	OrsajCp086	RPL32	NA	coding	truncated
AzucenaRS1	ONG0300530	Chr3:27202027-27205934	Chr3:27203972-27204169	OrsajCp086	RPL32	NA	coding	truncated
AzucenaRS1	ONG0600710	Chr6:28366093-28370300	Chr6:28366351-28366431	OrsajCt153	OrsajCt153	NA	non-coding	non-coding
AzucenaRS1	ONG0300530	Chr3:27202027-27205934	Chr3:27203362-27203442	OrsajCt153	OrsajCt153	NA	non-coding	non-coding
AzucenaRS1	ONG1200160	Chr12:5565442-5614888	Chr12:5578538-5578618	OrsajCt153	OrsajCt153	NA	non-coding	non-coding
AzucenaRS1	ONG0600710	Chr6:28366093-28370300	Chr6:28366513-28367479	OrsajCp087	ccsA	NA	coding	possible functionality
AzucenaRS1	ONG1200160	Chr12:5565442-5614888	Chr12:5578700-5579666	OrsajCp087	ccsA	NA	coding	possible functionality
AzucenaRS1	ONG0300530	Chr3:27202027-27205934	Chr3:27202326-27203280	OrsajCp087	ccsA	NA	coding	truncated
AzucenaRS1	ONG1000800	Chr10:4567747-4590186	Chr10:4568362-4569865	OrsajCp088	ndhD	NA	coding	possible functionality
AzucenaRS1	ONG0600710	Chr6:28366093-28370300	Chr6:28367675-28369178	OrsajCp088	ndhD	NA	coding	possible functionality
AzucenaRS1	ONG1200160	Chr12:5565442-5614888	Chr12:5579862-5581366	OrsajCp088	ndhD	NA	coding	truncated
AzucenaRS1	ONG0700280	Chr7:12509935-12514019	Chr7:12511933-12513439	OrsajCp088	ndhD	NA	coding	possible functionality
AzucenaRS1	ONG0700280	Chr7:12509935-12514019	Chr7:12511568-12511814	OrsajCp089	psaC	NA	coding	possible functionality
AzucenaRS1	ONG0600710	Chr6:28366093-28370300	Chr6:28369297-28369543	OrsajCp089	psaC	NA	coding	possible functionality
AzucenaRS1	ONG1200160	Chr12:5565442-5614888	Chr12:5581486-5581733	OrsajCp089	psaC	NA	coding	truncated
AzucenaRS1	ONG1000800	Chr10:4567747-4590186	Chr10:4569984-4570230	OrsajCp089	psaC	NA	coding	possible functionality
AzucenaRS1	ONG0900470	Chr9:18815185-18815583	Chr9:18815246-18815492	OrsajCp089	psaC	NA	coding	possible functionality
AzucenaRS1	ONG1000800	Chr10:4567747-4590186	Chr10:4570676-4570982	OrsajCp090	ndhE	NA	coding	possible functionality
AzucenaRS1	ONG1000750	Chr10:9060363-9061300	Chr10:9060616-9060922	OrsajCp090	ndhE	NA	coding	possible functionality
AzucenaRS1	ONG0800830	Chr8:21659196-21662586	Chr8:21661707-21662013	OrsajCp090	ndhE	NA	coding	possible functionality
AzucenaRS1	ONG0700280	Chr7:12509935-12514019	Chr7:12510816-12511122	OrsajCp090	ndhE	NA	coding	possible functionality
AzucenaRS1	ONG0600710	Chr6:28366093-28370300	Chr6:28369989-28370295	OrsajCp090	ndhE	NA	coding	possible functionality
AzucenaRS1	ONG1200160	Chr12:5565442-5614888	Chr12:5582165-5582471	OrsajCp090	ndhE	NA	coding	possible functionality
AzucenaRS1	ONG1200160	Chr12:5565442-5614888	Chr12:5582680-5583211	OrsajCp091	ndhG	NA	coding	possible functionality
AzucenaRS1	ONG0200320	Chr2:14415137-14465127	Chr2:14415510-14416041	OrsajCp091	ndhG	NA	coding	possible functionality
AzucenaRS1	ONG0200320	Chr2:14415137-14465127	Chr2:14426213-14426744	OrsajCp091	ndhG	NA	coding	possible functionality
AzucenaRS1	ONG0800830	Chr8:21659196-21662586	Chr8:21660966-21661498	OrsajCp091	ndhG	NA	coding	truncated
AzucenaRS1	ONG0700280	Chr7:12509935-12514019	Chr7:12510088-12510607	OrsajCp091	ndhG	NA	coding	possible functionality
AzucenaRS1	ONG1200160	Chr12:5565442-5614888	Chr12:5583453-5583996	OrsajCp092	ndhI	NA	coding	possible functionality
AzucenaRS1	ONG0101490	Chr1:5088002-5102336	Chr1:5101539-5102082	OrsajCp092	ndhI	NA	coding	possible functionality
AzucenaRS1	ONG1000800	Chr10:4567747-4590186	Chr10:4574696-4575239	OrsajCp092	ndhI	NA	coding	possible functionality
AzucenaRS1	ONG0200320	Chr2:14415137-14465127	Chr2:14426986-14427529	OrsajCp092	ndhI	NA	coding	possible functionality
AzucenaRS1	ONG1000800	Chr10:4567747-4590186	Chr10:4575333-4577410	OrsajCp093	ndhA	NA	coding	truncated
AzucenaRS1	ONG1200160	Chr12:5565442-5614888	Chr12:5584090-5586167	OrsajCp093	ndhA	NA	coding	truncated
AzucenaRS1	ONG0101490	Chr1:5088002-5102336	Chr1:5099367-5101445	OrsajCp093	ndhA	NA	coding	truncated
AzucenaRS1	ONG0200320	Chr2:14415137-14465127	Chr2:14427623-14429699	OrsajCp093	ndhA	NA	coding	truncated
AzucenaRS1	ONG0200280	Chr2:13387925-13391173	Chr2:13388110-13390184	OrsajCp093	ndhA	NA	coding	truncated
AzucenaRS1	ONG1200160	Chr12:5565442-5614888	Chr12:5586168-5587350	OrsajCp094	ndhH	NA	coding	possible functionality
AzucenaRS1	ONG1000800	Chr10:4567747-4590186	Chr10:4577411-4578593	OrsajCp094	ndhH	NA	coding	possible functionality
AzucenaRS1	ONG0101490	Chr1:5088002-5102336	Chr1:5098184-5099366	OrsajCp094	ndhH	NA	coding	possible functionality
AzucenaRS1	ONG0400650	Chr4:22218500-22242217	Chr4:22218885-22220065	OrsajCp094	ndhH	NA	coding	truncated
AzucenaRS1	ONG1200760	Chr12:8132460-8224009	Chr12:8146749-8147343	OrsajM_p03	ORF25	1 of 9 edited	coding	possible functionality
AzucenaRS1	ONG1200760	Chr12:8132460-8224009	Chr12:8148070-8148529	OrsajM_p04	ORF152a	NA	coding	truncated
AzucenaRS1	ONG1200760	Chr12:8132460-8224009	Chr12:8136444-8136568	OrsajM_t02	trnV	NA	non-coding	non-coding
AzucenaRS1	ONG1200160	Chr12:5565442-5614888	Chr12:5567153-5567277	OrsajM_t02	trnV	NA	non-coding	non-coding
AzucenaRS1	ONG1200340	Chr12:11107495-11126183	Chr12:11124258-11124382	OrsajM_t02	trnV	NA	non-coding	non-coding
AzucenaRS1	ONG0500800	Chr5:6703677-6710515	Chr5:6707617-6707741	OrsajM_t02	trnV	NA	non-coding	non-coding
AzucenaRS1	ONG0100890	Chr1:34223473-34312493	Chr1:34281334-34281458	OrsajM_t02	trnV	NA	non-coding	non-coding
AzucenaRS1	ONG0600260	Chr6:12506510-12509730	Chr6:12507060-12507184	OrsajM_t02	trnV	NA	non-coding	non-coding
AzucenaRS1	ONG1200760	Chr12:8132460-8224009	Chr12:8135891-8135964	OrsajM_t03	trnM	NA	non-coding	non-coding
AzucenaRS1	ONG1200340	Chr12:11107495-11126183	Chr12:11124884-11124957	OrsajM_t03	trnM	NA	non-coding	non-coding
AzucenaRS1	ONG1200160	Chr12:5565442-5614888	Chr12:5567779-5567852	OrsajM_t03	trnM	NA	non-coding	non-coding
AzucenaRS1	ONG0801050	Chr8:17601092-17672113	Chr8:17609613-17609686	OrsajM_t03	trnM	NA	non-coding	non-coding
AzucenaRS1	ONG0600020	Chr6:1365756-1370765	Chr6:1365999-1366072	OrsajM_t03	trnM	NA	non-coding	non-coding
AzucenaRS1	ONG0100890	Chr1:34223473-34312493	Chr1:34265419-34265492	OrsajM_t03	trnM	NA	non-coding	non-coding
AzucenaRS1	ONG0100890	Chr1:34223473-34312493	Chr1:34280759-34280832	OrsajM_t03	trnM	NA	non-coding	non-coding
AzucenaRS1	ONG0101590	Chr1:3207552-3208551	Chr1:3208461-3208534	OrsajM_t03	trnM	NA	non-coding	non-coding
AzucenaRS1	ONG1100300	Chr11:10787441-10788829	Chr11:10787642-10787715	OrsajM_t03	trnM	NA	non-coding	non-coding
AzucenaRS1	ONG0500800	Chr5:6703677-6710515	Chr5:6707042-6707115	OrsajM_t03	trnM	NA	non-coding	non-coding
AzucenaRS1	ONG0301360	Chr3:5087518-5101484	Chr3:5099015-5099087	OrsajM_t03	trnM	NA	non-coding	non-coding
AzucenaRS1	ONG1000870	Chr10:8996935-9036133	Chr10:9018179-9018253	OrsajM_t04	trnH	NA	non-coding	non-coding
AzucenaRS1	ONG1000500	Chr10:23065012-23067714	Chr10:23066573-23066647	OrsajM_t04	trnH	NA	non-coding	non-coding
AzucenaRS1	ONG0900310	Chr9:12096889-12102247	Chr9:12097713-12097787	OrsajM_t04	trnH	NA	non-coding	non-coding
AzucenaRS1	ONG0801050	Chr8:17601092-17672113	Chr8:17653972-17654046	OrsajM_t04	trnH	NA	non-coding	non-coding
AzucenaRS1	ONG0800690	Chr8:23014317-23019542	Chr8:23017954-23018028	OrsajM_t04	trnH	NA	non-coding	non-coding
AzucenaRS1	ONG0801050	Chr8:17601092-17672113	Chr8:17636243-17636317	OrsajM_t04	trnH	NA	non-coding	non-coding
AzucenaRS1	ONG0301370	Chr3:6456251-6490442	Chr3:6468506-6468580	OrsajM_t04	trnH	NA	non-coding	non-coding
AzucenaRS1	ONG0300230	Chr3:14093358-14102636	Chr3:14098335-14098409	OrsajM_t04	trnH	NA	non-coding	non-coding
AzucenaRS1	ONG0101580	Chr1:26393644-26435187	Chr1:26422240-26422314	OrsajM_t04	trnH	NA	non-coding	non-coding
AzucenaRS1	ONG1200350	Chr12:11253067-11258538	Chr12:11257561-11257635	OrsajM_t04	trnH	NA	non-coding	non-coding
AzucenaRS1	ONG1100060	Chr11:3555598-3555707	Chr11:3555625-3555698	OrsajM_t04	trnH	NA	non-coding	non-coding
AzucenaRS1	ONG0400650	Chr4:22218500-22242217	Chr4:22236373-22236447	OrsajM_t04	trnH	NA	non-coding	non-coding
AzucenaRS1	ONG1200160	Chr12:5565442-5614888	Chr12:5598046-5598120	OrsajM_t05	trnP	NA	non-coding	non-coding
AzucenaRS1	ONG1000620	Chr10:21676258-21685243	Chr10:21676588-21676662	OrsajM_t05	trnP	NA	non-coding	non-coding
AzucenaRS1	ONG1000620	Chr10:21676258-21685243	Chr10:21676788-21676862	OrsajM_t06	trnW	NA	non-coding	non-coding
AzucenaRS1	ONG0100530	Chr1:19641222-19643431	Chr1:19643012-19643086	OrsajM_t06	trnW	NA	non-coding	non-coding
AzucenaRS1	ONG1201090	Chr12:21089302-21091393	Chr12:21090550-21090622	OrsajM_t07	trnQ	NA	non-coding	non-coding
AzucenaRS1	ONG0600250	Chr6:12267920-12299228	Chr6:12271810-12271882	OrsajM_t07	trnQ	NA	non-coding	non-coding
AzucenaRS1	ONG0600250	Chr6:12267920-12299228	Chr6:12273239-12273687	OrsajM_p06	RPS7	NA	coding	truncated
AzucenaRS1	ONG0600250	Chr6:12267920-12299228	Chr6:12274356-12275829	OrsajM_p07	ORF490	NA	coding	truncated
AzucenaRS1	ONG0600250	Chr6:12267920-12299228	Chr6:12276031-12276809	OrsajM_p08	ORF258	NA	coding	truncated
AzucenaRS1	ONG0301360	Chr3:5087518-5101484	Chr3:5099479-5099947	OrsajM_p09	ORFB	NA	coding	possible functionality
AzucenaRS1	ONG0301360	Chr3:5087518-5101484	Chr3:5099014-5099087	OrsajM_t08	trnM	NA	non-coding	non-coding
AzucenaRS1	ONG1200760	Chr12:8132460-8224009	Chr12:8135891-8135963	OrsajM_t08	trnM	NA	non-coding	non-coding
AzucenaRS1	ONG1200340	Chr12:11107495-11126183	Chr12:11124885-11124957	OrsajM_t08	trnM	NA	non-coding	non-coding
AzucenaRS1	ONG1200160	Chr12:5565442-5614888	Chr12:5567780-5567852	OrsajM_t08	trnM	NA	non-coding	non-coding
AzucenaRS1	ONG0801050	Chr8:17601092-17672113	Chr8:17609613-17609685	OrsajM_t08	trnM	NA	non-coding	non-coding
AzucenaRS1	ONG0600020	Chr6:1365756-1370765	Chr6:1366000-1366072	OrsajM_t08	trnM	NA	non-coding	non-coding
AzucenaRS1	ONG0100890	Chr1:34223473-34312493	Chr1:34265420-34265492	OrsajM_t08	trnM	NA	non-coding	non-coding
AzucenaRS1	ONG0100890	Chr1:34223473-34312493	Chr1:34280759-34280831	OrsajM_t08	trnM	NA	non-coding	non-coding
AzucenaRS1	ONG0101590	Chr1:3207552-3208551	Chr1:3208461-3208533	OrsajM_t08	trnM	NA	non-coding	non-coding
AzucenaRS1	ONG1100300	Chr11:10787441-10788829	Chr11:10787643-10787715	OrsajM_t08	trnM	NA	non-coding	non-coding
AzucenaRS1	ONG0500800	Chr5:6703677-6710515	Chr5:6707042-6707114	OrsajM_t08	trnM	NA	non-coding	non-coding
AzucenaRS1	ONG0301360	Chr3:5087518-5101484	Chr3:5096945-5097491	OrsajM_p10	ORF181	NA	coding	possible functionality
AzucenaRS1	ONG0301360	Chr3:5087518-5101484	Chr3:5093234-5093852	OrsajM_p11	nad6	4 of 18 edited	coding	possible functionality
AzucenaRS1	ONG0301360	Chr3:5087518-5101484	Chr3:5092997-5093027	OrsajM_t09	trnI	NA	non-coding	non-coding
AzucenaRS1	ONG0301360	Chr3:5087518-5101484	Chr3:5092238-5092961	OrsajM_p12	ccmC	NA	coding	possible functionality
AzucenaRS1	ONG0301360	Chr3:5087518-5101484	Chr3:5091452-5092004	OrsajM_p13	ORF183	NA	coding	possible functionality
AzucenaRS1	ONG0301360	Chr3:5087518-5101484	Chr3:5089214-5089288	OrsajM_t10	trnI	NA	non-coding	non-coding
AzucenaRS1	ONG0301360	Chr3:5087518-5101484	Chr3:5088415-5088489	OrsajM_t11	trnD	NA	non-coding	non-coding
AzucenaRS1	ONG0301360	Chr3:5087518-5101484	Chr3:5088145-5088217	OrsajM_t12	trnN	NA	non-coding	non-coding
AzucenaRS1	ONG1101130	Chr11:20757119-20819907	Chr11:20819016-20819090	OrsajM_t14	trnfM	NA	non-coding	non-coding
AzucenaRS1	ONG1200760	Chr12:8132460-8224009	Chr12:8208297-8208779	OrsajM_p26	ORF161	NA	coding	truncated
AzucenaRS1	ONG0300470	Chr3:25600673-25604877	Chr3:25603317-25603879	OrsajM_p28	ORF187	NA	coding	truncated
AzucenaRS1	ONG0400870	Chr4:31520941-31566168	Chr4:31558304-31558858	OrsajM_p28	ORF187	NA	coding	truncated
AzucenaRS1	ONG0800960	Chr8:13236935-13256514	Chr8:13250771-13251830	OrsajM_p32	RPS4	NA	coding	possible functionality
AzucenaRS1	ONG0800960	Chr8:13236935-13256514	Chr8:13249813-13250311	OrsajM_p33	RPS11	NA	coding	truncated
AzucenaRS1	ONG0800960	Chr8:13236935-13256514	Chr8:13245126-13245657	OrsajM_p34	ORF176	NA	coding	possible functionality
AzucenaRS1	ONG1200760	Chr12:8132460-8224009	Chr12:8144106-8144637	OrsajM_p34	ORF176	NA	coding	possible functionality
AzucenaRS1	ONG0800960	Chr8:13236935-13256514	Chr8:13238705-13238792	OrsajM_t15	trnS	NA	non-coding	non-coding
AzucenaRS1	ONG0400870	Chr4:31520941-31566168	Chr4:31537199-31537284	OrsajM_t15	trnS	NA	non-coding	non-coding
AzucenaRS1	ONG0800960	Chr8:13236935-13256514	Chr8:13237044-13237269	OrsajM_p35	atp9	NA	coding	truncated
AzucenaRS1	ONG0400870	Chr4:31520941-31566168	Chr4:31559539-31559661	OrsajM_r01	RRN5	NA	non-coding	non-coding
AzucenaRS1	ONG0300470	Chr3:25600673-25604877	Chr3:25602342-25602464	OrsajM_r01	RRN5	NA	non-coding	non-coding
AzucenaRS1	ONG0600060	Chr6:4204809-4207751	Chr6:4204809-4205504	OrsajM_p39	ORF241	NA	coding	truncated
AzucenaRS1	ONG0100890	Chr1:34223473-34312493	Chr1:34243256-34243359	OrsajM_t18	trnF	NA	non-coding	non-coding
AzucenaRS1	ONG0101580	Chr1:26393644-26435187	Chr1:26408510-26408612	OrsajM_t18	trnF	NA	non-coding	non-coding
AzucenaRS1	ONG0100890	Chr1:34223473-34312493	Chr1:34284555-34284657	OrsajM_t18	trnF	NA	non-coding	non-coding
AzucenaRS1	ONG0301370	Chr3:6456251-6490442	Chr3:6490113-6490215	OrsajM_t18	trnF	NA	non-coding	non-coding
AzucenaRS1	ONG1200340	Chr12:11107495-11126183	Chr12:11121062-11121164	OrsajM_t18	trnF	NA	non-coding	non-coding
AzucenaRS1	ONG0100890	Chr1:34223473-34312493	Chr1:34245602-34246175	OrsajM_p51	nad9	NA	coding	possible functionality
AzucenaRS1	ONG0100890	Chr1:34223473-34312493	Chr1:34246919-34247002	OrsajM_t19	trnY	NA	non-coding	non-coding
AzucenaRS1	ONG0100890	Chr1:34223473-34312493	Chr1:34261989-34262511	OrsajM_p53	ORF173	NA	coding	possible functionality
AzucenaRS1	ONG0300600	Chr3:28490491-28491355	Chr3:28490872-28491355	OrsajM_p53	ORF173	NA	coding	truncated
AzucenaRS1	ONG0100890	Chr1:34223473-34312493	Chr1:34308650-34309139	OrsajM_p54	ORF162	NA	coding	possible functionality
AzucenaRS1	ONG0200320	Chr2:14415137-14465127	Chr2:14453908-14453979	OrsajM_t21	trnC	NA	non-coding	non-coding
AzucenaRS1	ONG1000870	Chr10:8996935-9036133	Chr10:9027712-9027784	OrsajM_t22	trnR	NA	non-coding	non-coding
AzucenaRS1	ONG0301370	Chr3:6456251-6490442	Chr3:6480585-6480657	OrsajM_t22	trnR	NA	non-coding	non-coding
AzucenaRS1	ONG0300660	Chr3:29591691-29595267	Chr3:29594988-29595061	OrsajM_t22	trnR	NA	non-coding	non-coding
AzucenaRS1	ONG0801050	Chr8:17601092-17672113	Chr8:17620348-17620418	OrsajM_t22	trnR	NA	non-coding	non-coding
MH63RS3	ONG1200350	Chr12:10403794-10409266	Chr12:10406708-10407770	OrsajCp002	psbA	NA	coding	truncated
MH63RS3	ONG1000500	Chr10:23454416-23457136	Chr10:23454416-23455465	OrsajCp002	psbA	NA	coding	truncated
MH63RS3	ONG1200350	Chr12:10403794-10409266	Chr12:10403915-10406489	OrsajCt121	trnK	NA	non-coding	non-coding
MH63RS3	ONG1200350	Chr12:10403794-10409266	Chr12:10404648-10406184	OrsajCp003	matK	NA	coding	possible functionality
MH63RS3	ONG0100140	Chr1:4907842-4908906	Chr1:4907923-4907996	OrsajCt122	trnQ	NA	non-coding	non-coding
MH63RS3	ONG1000540	Chr10:24818038-24818317	Chr10:24818125-24818198	OrsajCt122	trnQ	NA	non-coding	non-coding
MH63RS3	ONG1000530	Chr10:24598643-24602958	Chr10:24602592-24602778	OrsajCp005	psbK	NA	coding	possible functionality
MH63RS3	ONG1000530	Chr10:24598643-24602958	Chr10:24602092-24602203	OrsajCp006	psbI	NA	coding	possible functionality
MH63RS3	ONG0600050	Chr6:3818837-3819500	Chr6:3818899-3819010	OrsajCp006	psbI	NA	coding	possible functionality
MH63RS3	ONG1000530	Chr10:24598643-24602958	Chr10:24601894-24601982	OrsajCt123	trnS	NA	non-coding	non-coding
MH63RS3	ONG0200820	Chr2:34052557-34052710	Chr2:34052618-34052706	OrsajCt123	trnS	NA	non-coding	non-coding
MH63RS3	ONG0200750	Chr2:30429384-30429637	Chr2:30429485-30429574	OrsajCt123	trnS	NA	non-coding	non-coding
MH63RS3	ONG1000530	Chr10:24598643-24602958	Chr10:24601159-24601462	OrsajCp007	ORF100	NA	coding	possible functionality
MH63RS3	ONG1100990	Chr11:21025589-21046467	Chr11:21038401-21039463	OrsajCp008	psbD	NA	coding	possible functionality
MH63RS3	ONG1000530	Chr10:24598643-24602958	Chr10:24599848-24600910	OrsajCp008	psbD	NA	coding	possible functionality
MH63RS3	ONG0500620	Chr5:13094431-13125333	Chr5:13116455-13117877	OrsajCp009	psbC	NA	coding	possible functionality
MH63RS3	ONG1200950	Chr12:22246493-22251003	Chr12:22247393-22247481	OrsajCt124	trnS	NA	non-coding	non-coding
MH63RS3	ONG0500620	Chr5:13094431-13125333	Chr5:13118049-13118137	OrsajCt124	trnS	NA	non-coding	non-coding
MH63RS3	ONG0400110	Chr4:4828813-4829683	Chr4:4829414-4829502	OrsajCt124	trnS	NA	non-coding	non-coding
MH63RS3	ONG0301190	Chr3:1950044-1952378	Chr3:1951229-1951418	OrsajCp010	psbZ	NA	coding	possible functionality
MH63RS3	ONG1200950	Chr12:22246493-22251003	Chr12:22246858-22247047	OrsajCp010	psbZ	NA	coding	possible functionality
MH63RS3	ONG1200950	Chr12:22246493-22251003	Chr12:22246582-22246653	OrsajCt125	trnG	NA	non-coding	non-coding
MH63RS3	ONG1100990	Chr11:21025589-21046467	Chr11:21034420-21034491	OrsajCt125	trnG	NA	non-coding	non-coding
MH63RS3	ONG1100990	Chr11:21025589-21046467	Chr11:21034220-21034294	OrsajCt126	trnG	NA	non-coding	non-coding
MH63RS3	ONG0101340	Chr1:37676666-37678005	Chr1:37676854-37676928	OrsajCt126	trnG	NA	non-coding	non-coding
MH63RS3	ONG0600720	Chr6:29161938-29163006	Chr6:29162209-29162281	OrsajCt126	trnG	NA	non-coding	non-coding
MH63RS3	ONG1100990	Chr11:21025589-21046467	Chr11:21031454-21031528	OrsajCt127	trnfM	NA	non-coding	non-coding
MH63RS3	ONG1100990	Chr11:21025589-21046467	Chr11:21033913-21033987	OrsajCt127	trnfM	NA	non-coding	non-coding
MH63RS3	ONG0400920	Chr4:8674257-8675921	Chr4:8674984-8675197	OrsajCp012	ORF70	NA	coding	possible functionality
MH63RS3	ONG0200870	Chr2:36548568-36549117	Chr2:36548686-36548892	OrsajCp012	ORF70	NA	coding	truncated
MH63RS3	ONG0400920	Chr4:8674257-8675921	Chr4:8675472-8675544	OrsajCt130	trnT	NA	non-coding	non-coding
MH63RS3	ONG0400220	Chr4:11664683-11665838	Chr4:11665704-11665776	OrsajCt130	trnT	NA	non-coding	non-coding
MH63RS3	ONG0400920	Chr4:8674257-8675921	Chr4:8675540-8675613	OrsajCt131	trnT	NA	non-coding	non-coding
MH63RS3	ONG0400220	Chr4:11664683-11665838	Chr4:11665635-11665708	OrsajCt131	trnT	NA	non-coding	non-coding
MH63RS3	ONG0200020	Chr2:994083-994333	Chr2:994087-994159	OrsajCt132	trnE	NA	non-coding	non-coding
MH63RS3	ONG0200020	Chr2:994083-994333	Chr2:994220-994304	OrsajCt133	trnY	NA	non-coding	non-coding
MH63RS3	ONG0600920	Chr6:8925320-8927573	Chr6:8925753-8925827	OrsajCt134	trnD	NA	non-coding	non-coding
MH63RS3	ONG0601020	Chr6:8167456-8291650	Chr6:8277932-8278003	OrsajCt135	trnC	NA	non-coding	non-coding
MH63RS3	ONG0400220	Chr4:11664683-11665838	Chr4:11665060-11665131	OrsajCt135	trnC	NA	non-coding	non-coding
MH63RS3	ONG0200980	Chr2:22371616-22372517	Chr2:22371889-22371958	OrsajCt135	trnC	NA	non-coding	non-coding
MH63RS3	ONG0301070	Chr3:14094199-14098881	Chr3:14095039-14097088	OrsajCp016	rpoC1	NA	coding	possible functionality
MH63RS3	ONG1000620	Chr10:22017774-22026774	Chr10:22023563-22025612	OrsajCp016	rpoC1	NA	coding	truncated
MH63RS3	ONG0900730	Chr9:13497419-13501862	Chr9:13498475-13499186	OrsajCp018	RPS2	NA	coding	possible functionality
MH63RS3	ONG0400960	Chr4:13988792-14000434	Chr4:13989467-13990178	OrsajCp018	RPS2	NA	coding	possible functionality
MH63RS3	ONG0900730	Chr9:13497419-13501862	Chr9:13497481-13498225	OrsajCp019	atpI	NA	coding	possible functionality
MH63RS3	ONG0101420	Chr1:18965766-18977180	Chr1:18974722-18976246	OrsajCp022	atpA	NA	coding	possible functionality
MH63RS3	ONG0600990	Chr6:23471988-23490477	Chr6:23477440-23477512	OrsajCt136	trnR	NA	non-coding	non-coding
MH63RS3	ONG0101420	Chr1:18965766-18977180	Chr1:18974518-18974590	OrsajCt136	trnR	NA	non-coding	non-coding
MH63RS3	ONG0300660	Chr3:30664498-30668069	Chr3:30667790-30667862	OrsajCt136	trnR	NA	non-coding	non-coding
MH63RS3	ONG0101420	Chr1:18965766-18977180	Chr1:18973835-18974147	OrsajCp023	RPS14	NA	coding	possible functionality
MH63RS3	ONG0101420	Chr1:18965766-18977180	Chr1:18971483-18973688	OrsajCp024	psaB	NA	coding	possible functionality
MH63RS3	ONG1100990	Chr11:21025589-21046467	Chr11:21028256-21030403	OrsajCp024	psaB	NA	coding	truncated
MH63RS3	ONG1100990	Chr11:21025589-21046467	Chr11:21025978-21028231	OrsajCp025	psaA	NA	coding	possible functionality
MH63RS3	ONG1101010	Chr11:19979893-19982862	Chr11:19980177-19982430	OrsajCp025	psaA	NA	coding	possible functionality
MH63RS3	ONG0101420	Chr1:18965766-18977180	Chr1:18969204-18971458	OrsajCp025	psaA	NA	coding	truncated
MH63RS3	ONG0101420	Chr1:18965766-18977180	Chr1:18966460-18968439	OrsajCp026	YCF3	NA	coding	truncated
MH63RS3	ONG0401110	Chr4:33739708-33740083	Chr4:33739979-33740066	OrsajCt137	trnS	NA	non-coding	non-coding
MH63RS3	ONG0101420	Chr1:18965766-18977180	Chr1:18965774-18965861	OrsajCt137	trnS	NA	non-coding	non-coding
MH63RS3	ONG1200340	Chr12:10258238-10276922	Chr12:10258306-10258379	OrsajCt138	trnT	NA	non-coding	non-coding
MH63RS3	ONG1200630	Chr12:20957251-20958610	Chr12:20957470-20957543	OrsajCt138	trnT	NA	non-coding	non-coding
MH63RS3	ONG1200630	Chr12:20957251-20958610	Chr12:20958479-20958552	OrsajCt138	trnT	NA	non-coding	non-coding
MH63RS3	ONG1200630	Chr12:20957251-20958610	Chr12:20957974-20958047	OrsajCt138	trnT	NA	non-coding	non-coding
MH63RS3	ONG1200340	Chr12:10258238-10276922	Chr12:10270956-10271582	OrsajCt139	trnL	NA	non-coding	non-coding
MH63RS3	ONG1200880	Chr12:6679846-6680337	Chr12:6679910-6679983	OrsajCt140	trnF	NA	non-coding	non-coding
MH63RS3	ONG1200340	Chr12:10258238-10276922	Chr12:10271826-10271899	OrsajCt140	trnF	NA	non-coding	non-coding
MH63RS3	ONG1200340	Chr12:10258238-10276922	Chr12:10272393-10272873	OrsajCp028	ndhJ	NA	coding	possible functionality
MH63RS3	ONG1200340	Chr12:10258238-10276922	Chr12:10272970-10273648	OrsajCp029	ndhK	NA	coding	possible functionality
MH63RS3	ONG0600260	Chr6:12305900-12309121	Chr6:12307929-12308607	OrsajCp029	ndhK	NA	coding	truncated
MH63RS3	ONG1200340	Chr12:10258238-10276922	Chr12:10273701-10274064	OrsajCp030	ndhC	NA	coding	possible functionality
MH63RS3	ONG0400180	Chr4:9533094-9535072	Chr4:9533234-9533601	OrsajCp030	ndhC	NA	coding	truncated
MH63RS3	ONG0600260	Chr6:12305900-12309121	Chr6:12307513-12307879	OrsajCp030	ndhC	NA	coding	truncated
MH63RS3	ONG1200340	Chr12:10258238-10276922	Chr12:10275402-10275441	OrsajCt141	trnV	NA	non-coding	non-coding
MH63RS3	ONG0600260	Chr6:12305900-12309121	Chr6:12306136-12306175	OrsajCt141	trnV	NA	non-coding	non-coding
MH63RS3	ONG0401090	Chr4:20586119-20597668	Chr4:20595282-20595321	OrsajCt141	trnV	NA	non-coding	non-coding
MH63RS3	ONG1200340	Chr12:10258238-10276922	Chr12:10275622-10275695	OrsajCt142	trnM	NA	non-coding	non-coding
MH63RS3	ONG0401090	Chr4:20586119-20597668	Chr4:20595498-20595571	OrsajCt142	trnM	NA	non-coding	non-coding
MH63RS3	ONG0600020	Chr6:956441-969370	Chr6:956681-956754	OrsajCt142	trnM	NA	non-coding	non-coding
MH63RS3	ONG1100300	Chr11:11381591-11382994	Chr11:11381792-11381865	OrsajCt142	trnM	NA	non-coding	non-coding
MH63RS3	ONG1200340	Chr12:10258238-10276922	Chr12:10275807-10276221	OrsajCp031	atpE	NA	coding	possible functionality
MH63RS3	ONG0600020	Chr6:956441-969370	Chr6:956866-957280	OrsajCp031	atpE	NA	coding	possible functionality
MH63RS3	ONG0401090	Chr4:20586119-20597668	Chr4:20595675-20596089	OrsajCp031	atpE	NA	coding	possible functionality
MH63RS3	ONG0800490	Chr8:17492429-17493096	Chr8:17492668-17493086	OrsajCp031	atpE	NA	coding	truncated
MH63RS3	ONG1100560	Chr11:22566235-22585570	Chr11:22585190-22585319	OrsajCp034	ORF42	NA	coding	possible functionality
MH63RS3	ONG0400920	Chr4:8674257-8675921	Chr4:8674443-8674554	OrsajCp037	psaI	NA	coding	possible functionality
MH63RS3	ONG0400760	Chr4:29144142-29144415	Chr4:29144278-29144387	OrsajCp037	psaI	NA	coding	truncated
MH63RS3	ONG0100550	Chr1:22052969-22059259	Chr1:22053462-22053573	OrsajCp037	psaI	NA	coding	possible functionality
MH63RS3	ONG0600920	Chr6:8925320-8927573	Chr6:8926676-8927234	OrsajCp038	YCF4	NA	coding	possible functionality
MH63RS3	ONG0100550	Chr1:22052969-22059259	Chr1:22053947-22054505	OrsajCp038	YCF4	NA	coding	possible functionality
MH63RS3	ONG0100550	Chr1:22052969-22059259	Chr1:22054535-22054794	OrsajCp039	ORF85	NA	coding	truncated
MH63RS3	ONG0600920	Chr6:8925320-8927573	Chr6:8927264-8927523	OrsajCp039	ORF85	NA	coding	truncated
MH63RS3	ONG0100550	Chr1:22052969-22059259	Chr1:22054924-22055617	OrsajCp040	cemA	NA	coding	possible functionality
MH63RS3	ONG0100550	Chr1:22052969-22059259	Chr1:22055814-22056777	OrsajCp041	petA	NA	coding	possible functionality
MH63RS3	ONG1000620	Chr10:22017774-22026774	Chr10:22020719-22020842	OrsajCp042	psbJ	NA	coding	possible functionality
MH63RS3	ONG0100550	Chr1:22052969-22059259	Chr1:22058841-22058964	OrsajCp042	psbJ	NA	coding	possible functionality
MH63RS3	ONG1000620	Chr10:22017774-22026774	Chr10:22020476-22020593	OrsajCp043	psbL	NA	coding	possible functionality
MH63RS3	ONG0100550	Chr1:22052969-22059259	Chr1:22059090-22059207	OrsajCp043	psbL	NA	coding	possible functionality
MH63RS3	ONG0300580	Chr3:29321725-29322083	Chr3:29321792-29321909	OrsajCp043	psbL	NA	coding	possible functionality
MH63RS3	ONG1000620	Chr10:22017774-22026774	Chr10:22020334-22020454	OrsajCp044	psbF	NA	coding	possible functionality
MH63RS3	ONG0300560	Chr3:28851810-28852229	Chr3:28852099-28852219	OrsajCp044	psbF	NA	coding	possible functionality
MH63RS3	ONG0700550	Chr7:23649907-23651784	Chr7:23651589-23651708	OrsajCp044	psbF	NA	coding	truncated
MH63RS3	ONG1000620	Chr10:22017774-22026774	Chr10:22020072-22020324	OrsajCp045	psbE	NA	coding	possible functionality
MH63RS3	ONG0300560	Chr3:28851810-28852229	Chr3:28851837-28852089	OrsajCp045	psbE	NA	coding	possible functionality
MH63RS3	ONG0700550	Chr7:23649907-23651784	Chr7:23651327-23651579	OrsajCp045	psbE	NA	coding	possible functionality
MH63RS3	ONG1000620	Chr10:22017774-22026774	Chr10:22018780-22018876	OrsajCp046	petL	NA	coding	possible functionality
MH63RS3	ONG0700550	Chr7:23649907-23651784	Chr7:23650037-23650133	OrsajCp046	petL	NA	coding	possible functionality
MH63RS3	ONG1200090	Chr12:4363515-4366447	Chr12:4363580-4363676	OrsajCp046	petL	NA	coding	possible functionality
MH63RS3	ONG1000620	Chr10:22017774-22026774	Chr10:22018494-22018608	OrsajCp047	petG	NA	coding	possible functionality
MH63RS3	ONG0301180	Chr3:21557277-21557702	Chr3:21557421-21557535	OrsajCp047	petG	NA	coding	possible functionality
MH63RS3	ONG0100530	Chr1:20532227-20534435	Chr1:20533786-20533900	OrsajCp047	petG	NA	coding	possible functionality
MH63RS3	ONG1000620	Chr10:22017774-22026774	Chr10:22018304-22018378	OrsajCt143	trnW	NA	non-coding	non-coding
MH63RS3	ONG1000620	Chr10:22017774-22026774	Chr10:22018103-22018178	OrsajCt144	trnP	NA	non-coding	non-coding
MH63RS3	ONG1100180	Chr11:6254294-6254656	Chr11:6254428-6254503	OrsajCt144	trnP	NA	non-coding	non-coding
MH63RS3	ONG0100530	Chr1:20532227-20534435	Chr1:20534216-20534291	OrsajCt144	trnP	NA	non-coding	non-coding
MH63RS3	ONG0200230	Chr2:10126477-10127689	Chr2:10126922-10127055	OrsajCp048	ORF44	NA	coding	truncated
MH63RS3	ONG0800710	Chr8:12254753-12257549	Chr8:12257293-12257494	OrsajCp049	RPL33	NA	coding	possible functionality
MH63RS3	ONG0800710	Chr8:12254753-12257549	Chr8:12256561-12257053	OrsajCp050	RPS18	NA	coding	possible functionality
MH63RS3	ONG0800710	Chr8:12254753-12257549	Chr8:12255979-12256339	OrsajCp051	RPL20	NA	coding	possible functionality
MH63RS3	ONG1100550	Chr11:21804713-21805103	Chr11:21804910-21805042	OrsajCp055	psbN	NA	coding	possible functionality
MH63RS3	ONG1101090	Chr11:5403504-5414190	Chr11:5405238-5406252	OrsajCp059	rpoA	NA	coding	possible functionality
MH63RS3	ONG0401010	Chr4:14730223-14751945	Chr4:14744526-14745540	OrsajCp059	rpoA	NA	coding	possible functionality
MH63RS3	ONG1101090	Chr11:5403504-5414190	Chr11:5404743-5405175	OrsajCp060	RPS11	NA	coding	possible functionality
MH63RS3	ONG0401010	Chr4:14730223-14751945	Chr4:14745603-14746035	OrsajCp060	RPS11	NA	coding	possible functionality
MH63RS3	ONG0900100	Chr9:4718770-4720168	Chr9:4719740-4720157	OrsajCp060	RPS11	NA	coding	truncated
MH63RS3	ONG1101090	Chr11:5403504-5414190	Chr11:5404456-5404570	OrsajCp061	RPL36	NA	coding	possible functionality
MH63RS3	ONG0401010	Chr4:14730223-14751945	Chr4:14746209-14746323	OrsajCp061	RPL36	NA	coding	possible functionality
MH63RS3	ONG0300520	Chr3:27733340-27735863	Chr3:27733427-27733541	OrsajCp061	RPL36	NA	coding	possible functionality
MH63RS3	ONG1101090	Chr11:5403504-5414190	Chr11:5404022-5404346	OrsajCp062	infA	NA	coding	possible functionality
MH63RS3	ONG0401010	Chr4:14730223-14751945	Chr4:14746433-14746757	OrsajCp062	infA	NA	coding	possible functionality
MH63RS3	ONG0700670	Chr7:29005935-29010569	Chr7:29006010-29006334	OrsajCp062	infA	NA	coding	possible functionality
MH63RS3	ONG0300520	Chr3:27733340-27735863	Chr3:27733653-27733977	OrsajCp062	infA	NA	coding	possible functionality
MH63RS3	ONG0401010	Chr4:14730223-14751945	Chr4:14746892-14747303	OrsajCp063	RPS8	NA	coding	possible functionality
MH63RS3	ONG0700670	Chr7:29005935-29010569	Chr7:29006470-29006881	OrsajCp063	RPS8	NA	coding	possible functionality
MH63RS3	ONG0900310	Chr9:13225342-13230713	Chr9:13230168-13230579	OrsajCp063	RPS8	NA	coding	truncated
MH63RS3	ONG0300520	Chr3:27733340-27735863	Chr3:27734112-27734523	OrsajCp063	RPS8	NA	coding	truncated
MH63RS3	ONG0401010	Chr4:14730223-14751945	Chr4:14747442-14747814	OrsajCp064	RPL14	NA	coding	possible functionality
MH63RS3	ONG0700670	Chr7:29005935-29010569	Chr7:29007020-29007392	OrsajCp064	RPL14	NA	coding	possible functionality
MH63RS3	ONG0900310	Chr9:13225342-13230713	Chr9:13229657-13230029	OrsajCp064	RPL14	NA	coding	possible functionality
MH63RS3	ONG0401010	Chr4:14730223-14751945	Chr4:14747926-14749395	OrsajCp065	RPL16	NA	coding	truncated
MH63RS3	ONG0700670	Chr7:29005935-29010569	Chr7:29007501-29008961	OrsajCp065	RPL16	NA	coding	truncated
MH63RS3	ONG0900310	Chr9:13225342-13230713	Chr9:13228089-13229548	OrsajCp065	RPL16	NA	coding	truncated
MH63RS3	ONG0401010	Chr4:14730223-14751945	Chr4:14749540-14750260	OrsajCp066	RPS3	NA	coding	possible functionality
MH63RS3	ONG0700670	Chr7:29005935-29010569	Chr7:29009106-29009827	OrsajCp066	RPS3	NA	coding	truncated
MH63RS3	ONG0900310	Chr9:13225342-13230713	Chr9:13227222-13227944	OrsajCp066	RPS3	NA	coding	truncated
MH63RS3	ONG0401010	Chr4:14730223-14751945	Chr4:14750314-14750764	OrsajCp067	RPL22	NA	coding	possible functionality
MH63RS3	ONG0700670	Chr7:29005935-29010569	Chr7:29009881-29010331	OrsajCp067	RPL22	NA	coding	possible functionality
MH63RS3	ONG0900310	Chr9:13225342-13230713	Chr9:13226717-13227168	OrsajCp067	RPL22	NA	coding	truncated
MH63RS3	ONG1200500	Chr12:17488123-17488597	Chr12:17488161-17488597	OrsajCp067	RPL22	NA	coding	truncated
MH63RS3	ONG0401010	Chr4:14730223-14751945	Chr4:14751112-14751361	OrsajCp068	ORF82	NA	coding	possible functionality
MH63RS3	ONG0101470	Chr1:23888801-23891663	Chr1:23890961-23891211	OrsajCp068	ORF82	NA	coding	truncated
MH63RS3	ONG1000500	Chr10:23454416-23457136	Chr10:23455858-23456107	OrsajCp068	ORF82	NA	coding	possible functionality
MH63RS3	ONG0900310	Chr9:13225342-13230713	Chr9:13226128-13226377	OrsajCp068	ORF82	NA	coding	possible functionality
MH63RS3	ONG1200350	Chr12:10403794-10409266	Chr12:10408152-10408402	OrsajCp068	ORF82	NA	coding	truncated
MH63RS3	ONG0600600	Chr6:24558054-24558423	Chr6:24558073-24558310	OrsajCp068	ORF82	NA	coding	truncated
MH63RS3	ONG0900310	Chr9:13225342-13230713	Chr9:13226167-13226242	OrsajCt145	trnH	NA	non-coding	non-coding
MH63RS3	ONG0401010	Chr4:14730223-14751945	Chr4:14751247-14751322	OrsajCt145	trnH	NA	non-coding	non-coding
MH63RS3	ONG0400650	Chr4:25289749-25382629	Chr4:25331612-25331687	OrsajCt145	trnH	NA	non-coding	non-coding
MH63RS3	ONG0101470	Chr1:23888801-23891663	Chr1:23891000-23891075	OrsajCt145	trnH	NA	non-coding	non-coding
MH63RS3	ONG1200350	Chr12:10403794-10409266	Chr12:10408288-10408363	OrsajCt145	trnH	NA	non-coding	non-coding
MH63RS3	ONG1000500	Chr10:23454416-23457136	Chr10:23455993-23456068	OrsajCt145	trnH	NA	non-coding	non-coding
MH63RS3	ONG0300230	Chr3:14358557-14367586	Chr3:14363284-14363359	OrsajCt145	trnH	NA	non-coding	non-coding
MH63RS3	ONG0101470	Chr1:23888801-23891663	Chr1:23889461-23890945	OrsajCp069	RPL2	NA	coding	truncated
MH63RS3	ONG0401010	Chr4:14730223-14751945	Chr4:14751483-14751897	OrsajCp070	ORF137	NA	coding	possible functionality
MH63RS3	ONG0400650	Chr4:25289749-25382629	Chr4:25331848-25332262	OrsajCp070	ORF137	NA	coding	possible functionality
MH63RS3	ONG0101470	Chr1:23888801-23891663	Chr1:23890426-23890839	OrsajCp070	ORF137	NA	coding	truncated
MH63RS3	ONG0900310	Chr9:13225342-13230713	Chr9:13225592-13226006	OrsajCp070	ORF137	NA	coding	possible functionality
MH63RS3	ONG1200350	Chr12:10403794-10409266	Chr12:10408524-10408938	OrsajCp070	ORF137	NA	coding	possible functionality
MH63RS3	ONG1000500	Chr10:23454416-23457136	Chr10:23456229-23456643	OrsajCp070	ORF137	NA	coding	truncated
MH63RS3	ONG0401010	Chr4:14730223-14751945	Chr4:14742912-14743194	OrsajCp071	RPL23	NA	coding	possible functionality
MH63RS3	ONG0400650	Chr4:25289749-25382629	Chr4:25333578-25333860	OrsajCp071	RPL23	NA	coding	possible functionality
MH63RS3	ONG0900670	Chr9:8778245-8784052	Chr9:8783484-8783767	OrsajCp071	RPL23	NA	coding	truncated
MH63RS3	ONG0100770	Chr1:30226506-30226838	Chr1:30226570-30226838	OrsajCp071	RPL23	NA	coding	truncated
MH63RS3	ONG0401010	Chr4:14730223-14751945	Chr4:14742664-14742738	OrsajCt146	trnI	NA	non-coding	non-coding
MH63RS3	ONG0400650	Chr4:25289749-25382629	Chr4:25334034-25334108	OrsajCt146	trnI	NA	non-coding	non-coding
MH63RS3	ONG0900670	Chr9:8778245-8784052	Chr9:8783236-8783310	OrsajCt146	trnI	NA	non-coding	non-coding
MH63RS3	ONG1000710	Chr10:16823396-16823812	Chr10:16823642-16823729	OrsajCp072	ORF28	NA	coding	possible functionality
MH63RS3	ONG0401010	Chr4:14730223-14751945	Chr4:14742256-14742343	OrsajCp072	ORF28	NA	coding	possible functionality
MH63RS3	ONG0400650	Chr4:25289749-25382629	Chr4:25334429-25334516	OrsajCp072	ORF28	NA	coding	possible functionality
MH63RS3	ONG0900670	Chr9:8778245-8784052	Chr9:8782828-8782915	OrsajCp072	ORF28	NA	coding	possible functionality
MH63RS3	ONG0200380	Chr2:17161709-17162024	Chr2:17161906-17161990	OrsajCp072	ORF28	NA	coding	truncated
MH63RS3	ONG0401010	Chr4:14730223-14751945	Chr4:14741130-14741880	OrsajCp074	ORF249	NA	coding	possible functionality
MH63RS3	ONG0400650	Chr4:25289749-25382629	Chr4:25309077-25309807	OrsajCp074	ORF249	NA	coding	truncated
MH63RS3	ONG0500620	Chr5:13094431-13125333	Chr5:13124459-13125209	OrsajCp074	ORF249	NA	coding	possible functionality
MH63RS3	ONG0900670	Chr9:8778245-8784052	Chr9:8781702-8782452	OrsajCp074	ORF249	NA	coding	possible functionality
MH63RS3	ONG0500620	Chr5:13094431-13125333	Chr5:13124414-13124495	OrsajCt147	trnL	NA	non-coding	non-coding
MH63RS3	ONG0401010	Chr4:14730223-14751945	Chr4:14741085-14741166	OrsajCt147	trnL	NA	non-coding	non-coding
MH63RS3	ONG0400650	Chr4:25289749-25382629	Chr4:25309771-25309852	OrsajCt147	trnL	NA	non-coding	non-coding
MH63RS3	ONG0300960	Chr3:39108982-39110532	Chr3:39109612-39109693	OrsajCt147	trnL	NA	non-coding	non-coding
MH63RS3	ONG0600130	Chr6:6775260-6775669	Chr6:6775279-6775360	OrsajCt147	trnL	NA	non-coding	non-coding
MH63RS3	ONG0900670	Chr9:8778245-8784052	Chr9:8781658-8781738	OrsajCt147	trnL	NA	non-coding	non-coding
MH63RS3	ONG0900170	Chr9:7454989-7455361	Chr9:7455109-7455188	OrsajCt147	trnL	NA	non-coding	non-coding
MH63RS3	ONG0401010	Chr4:14730223-14751945	Chr4:14738237-14740482	OrsajCp075	ndhB	NA	coding	truncated
MH63RS3	ONG0400490	Chr4:20683135-20688272	Chr4:20683135-20685301	OrsajCp075	ndhB	NA	coding	truncated
MH63RS3	ONG0500620	Chr5:13094431-13125333	Chr5:13121567-13123811	OrsajCp075	ndhB	NA	coding	truncated
MH63RS3	ONG0900670	Chr9:8778245-8784052	Chr9:8778809-8781054	OrsajCp075	ndhB	NA	coding	truncated
MH63RS3	ONG1101090	Chr11:5403504-5414190	Chr11:5408673-5409144	OrsajCp076	RPS7	NA	coding	possible functionality
MH63RS3	ONG0401010	Chr4:14730223-14751945	Chr4:14737467-14737938	OrsajCp076	RPS7	NA	coding	possible functionality
MH63RS3	ONG0400490	Chr4:20683135-20688272	Chr4:20685600-20686071	OrsajCp076	RPS7	NA	coding	truncated
MH63RS3	ONG1101090	Chr11:5403504-5414190	Chr11:5410956-5411173	OrsajCp077	ORF72	NA	coding	truncated
MH63RS3	ONG0401010	Chr4:14730223-14751945	Chr4:14735438-14735655	OrsajCp077	ORF72	NA	coding	truncated
MH63RS3	ONG0400490	Chr4:20683135-20688272	Chr4:20687880-20688097	OrsajCp077	ORF72	NA	coding	truncated
MH63RS3	ONG0500620	Chr5:13094431-13125333	Chr5:13115170-13115386	OrsajCp077	ORF72	NA	coding	truncated
MH63RS3	ONG0200010	Chr2:768078-775825	Chr2:770342-770559	OrsajCp077	ORF72	NA	coding	truncated
MH63RS3	ONG1101090	Chr11:5403504-5414190	Chr11:5411232-5411390	OrsajCp078	ORF85	NA	coding	truncated
MH63RS3	ONG0500620	Chr5:13094431-13125333	Chr5:13114953-13115111	OrsajCp078	ORF85	NA	coding	truncated
MH63RS3	ONG0401010	Chr4:14730223-14751945	Chr4:14735221-14735379	OrsajCp078	ORF85	NA	coding	truncated
MH63RS3	ONG0200010	Chr2:768078-775825	Chr2:770124-770282	OrsajCp078	ORF85	NA	coding	truncated
MH63RS3	ONG1200300	Chr12:8373397-8377100	Chr12:8376902-8377061	OrsajCp078	ORF85	NA	coding	truncated
MH63RS3	ONG1101090	Chr11:5403504-5414190	Chr11:5411726-5411798	OrsajCt148	trnV	NA	non-coding	non-coding
MH63RS3	ONG0500620	Chr5:13094431-13125333	Chr5:13114545-13114617	OrsajCt148	trnV	NA	non-coding	non-coding
MH63RS3	ONG0401010	Chr4:14730223-14751945	Chr4:14734813-14734885	OrsajCt148	trnV	NA	non-coding	non-coding
MH63RS3	ONG0300950	Chr3:38752443-38754775	Chr3:38754012-38754084	OrsajCt148	trnV	NA	non-coding	non-coding
MH63RS3	ONG0200010	Chr2:768078-775825	Chr2:769709-769781	OrsajCt148	trnV	NA	non-coding	non-coding
MH63RS3	ONG0101400	Chr1:20113003-20113335	Chr1:20113215-20113287	OrsajCt148	trnV	NA	non-coding	non-coding
MH63RS3	ONG1101090	Chr11:5403504-5414190	Chr11:5412029-5413520	OrsajCr113	OrsajCr113	NA	non-coding	non-coding
MH63RS3	ONG0401010	Chr4:14730223-14751945	Chr4:14733091-14734582	OrsajCr113	OrsajCr113	NA	non-coding	non-coding
MH63RS3	ONG0200010	Chr2:768078-775825	Chr2:768078-769478	OrsajCr113	OrsajCr113	NA	non-coding	non-coding
MH63RS3	ONG0401010	Chr4:14730223-14751945	Chr4:14731762-14732781	OrsajCt149	OrsajCt149	NA	non-coding	non-coding
MH63RS3	ONG0400960	Chr4:13988792-14000434	Chr4:13995613-13996631	OrsajCt149	OrsajCt149	NA	non-coding	non-coding
MH63RS3	ONG0500620	Chr5:13094431-13125333	Chr5:13100079-13101100	OrsajCt149	OrsajCt149	NA	non-coding	non-coding
MH63RS3	ONG0401010	Chr4:14730223-14751945	Chr4:14732238-14732640	OrsajCp079	ORF133	NA	coding	possible functionality
MH63RS3	ONG0400960	Chr4:13988792-14000434	Chr4:13996089-13996490	OrsajCp079	ORF133	NA	coding	truncated
MH63RS3	ONG1200960	Chr12:10977027-10979249	Chr12:10978521-10978925	OrsajCp079	ORF133	NA	coding	truncated
MH63RS3	ONG0500620	Chr5:13094431-13125333	Chr5:13100555-13100959	OrsajCp079	ORF133	NA	coding	truncated
MH63RS3	ONG0401010	Chr4:14730223-14751945	Chr4:14730814-14731698	OrsajCt150	OrsajCt150	NA	non-coding	non-coding
MH63RS3	ONG0400960	Chr4:13988792-14000434	Chr4:13994665-13995549	OrsajCt150	OrsajCt150	NA	non-coding	non-coding
MH63RS3	ONG0500620	Chr5:13094431-13125333	Chr5:13099131-13100015	OrsajCt150	OrsajCt150	NA	non-coding	non-coding
MH63RS3	ONG0401010	Chr4:14730223-14751945	Chr4:14730869-14731199	OrsajCp080	ORF109	NA	coding	truncated
MH63RS3	ONG0400960	Chr4:13988792-14000434	Chr4:13994720-13995050	OrsajCp080	ORF109	NA	coding	truncated
MH63RS3	ONG0500620	Chr5:13094431-13125333	Chr5:13099186-13099516	OrsajCp080	ORF109	NA	coding	truncated
MH63RS3	ONG1100990	Chr11:21025589-21046467	Chr11:21040867-21040962	OrsajCr115	OrsajCr115	NA	non-coding	non-coding
MH63RS3	ONG0200010	Chr2:768078-775825	Chr2:773015-773110	OrsajCr115	OrsajCr115	NA	non-coding	non-coding
MH63RS3	ONG1100990	Chr11:21025589-21046467	Chr11:21041189-21041310	OrsajCr116	OrsajCr116	NA	non-coding	non-coding
MH63RS3	ONG0300150	Chr3:8195822-8196321	Chr3:8195916-8196037	OrsajCr116	OrsajCr116	NA	non-coding	non-coding
MH63RS3	ONG0200010	Chr2:768078-775825	Chr2:773338-773459	OrsajCr116	OrsajCr116	NA	non-coding	non-coding
MH63RS3	ONG1100990	Chr11:21025589-21046467	Chr11:21041568-21041642	OrsajCt151	OrsajCt151	NA	non-coding	non-coding
MH63RS3	ONG0200010	Chr2:768078-775825	Chr2:773716-773790	OrsajCt151	OrsajCt151	NA	non-coding	non-coding
MH63RS3	ONG0700470	Chr7:20368570-20368687	Chr7:20368594-20368669	OrsajCt151	OrsajCt151	NA	non-coding	non-coding
MH63RS3	ONG1100990	Chr11:21025589-21046467	Chr11:21041694-21041766	OrsajCp081	ORF23	NA	coding	possible functionality
MH63RS3	ONG0200010	Chr2:768078-775825	Chr2:773842-773914	OrsajCp081	ORF23	NA	coding	possible functionality
MH63RS3	ONG1100990	Chr11:21025589-21046467	Chr11:21041894-21041966	OrsajCt152	OrsajCt152	NA	non-coding	non-coding
MH63RS3	ONG0900660	Chr9:5349477-5388419	Chr9:5388226-5388298	OrsajCt152	OrsajCt152	NA	non-coding	non-coding
MH63RS3	ONG0401090	Chr4:20586119-20597668	Chr4:20588836-20588908	OrsajCt152	OrsajCt152	NA	non-coding	non-coding
MH63RS3	ONG0400650	Chr4:25289749-25382629	Chr4:25293259-25293331	OrsajCt152	OrsajCt152	NA	non-coding	non-coding
MH63RS3	ONG0100500	Chr1:20207391-20216332	Chr1:20215724-20215796	OrsajCt152	OrsajCt152	NA	non-coding	non-coding
MH63RS3	ONG0200010	Chr2:768078-775825	Chr2:774042-774114	OrsajCt152	OrsajCt152	NA	non-coding	non-coding
MH63RS3	ONG1100990	Chr11:21025589-21046467	Chr11:21042885-21043077	OrsajCp082	ORF63	NA	coding	possible functionality
MH63RS3	ONG0400650	Chr4:25289749-25382629	Chr4:25292148-25292340	OrsajCp082	ORF63	NA	coding	possible functionality
MH63RS3	ONG0200010	Chr2:768078-775825	Chr2:775035-775226	OrsajCp082	ORF63	NA	coding	truncated
MH63RS3	ONG1100990	Chr11:21025589-21046467	Chr11:21043497-21043770	OrsajCp083	RPS15	NA	coding	possible functionality
MH63RS3	ONG0400650	Chr4:25289749-25382629	Chr4:25291455-25291728	OrsajCp083	RPS15	NA	coding	possible functionality
MH63RS3	ONG1100990	Chr11:21025589-21046467	Chr11:21043908-21044079	OrsajCp084	ORF56	NA	coding	possible functionality
MH63RS3	ONG0400960	Chr4:13988792-14000434	Chr4:13999767-13999938	OrsajCp084	ORF56	NA	coding	possible functionality
MH63RS3	ONG0400650	Chr4:25289749-25382629	Chr4:25291154-25291317	OrsajCp084	ORF56	NA	coding	truncated
MH63RS3	ONG0400960	Chr4:13988792-14000434	Chr4:13997543-13999734	OrsajCp085	ndhF	NA	coding	truncated
MH63RS3	ONG0300530	Chr3:28193409-28197325	Chr3:28195366-28195562	OrsajCp086	RPL32	NA	coding	truncated
MH63RS3	ONG0300530	Chr3:28193409-28197325	Chr3:28194756-28194836	OrsajCt153	OrsajCt153	NA	non-coding	non-coding
[truncated: 8,213 more rows]
