# Supplementary material for: Continuous infiltration and evolutionary trajectory of nuclear organelle DNA inOryza
Source: HighWire-hosted journal article supplement (doi:10.1101/gr.279609.124), 2025-04-25
Supplement: Supplemental_Table_S7.xlsx [file Supplemental_Table_S7.xlsx]

## Sheet: Supplementary Table 7
Supplemental Table 7. The number of plastid and mitochondrial genes within NORGs in each accession.
The statistics were based on near-intact organellar genes (NIOGs) list in Supplementary Table 6.
Gene locus	Gene name	Gene type	Origin	O. sativa																O. glaberrima	O. barthii	O. glumaepatula	O. meridionalis
				LIMA	KHAO YAI GUANG	LIU XU	LARHA MUGAD	Minghui 63	PR 106	IR 64	Zhenshan 97	GOBOL SAIL	N22	NATEL BORO	Azucena	KETAN NANGKA	Nipponbare	CHAO MEO	ARC 10497
				Os127564RS1	Os127518RS1	Os125827RS1	Os125619RS1	MH63RS3	Os127742RS1	OsIR64RS1	ZS97RS3	Os132424RS1	OsN22RS2	Os127652RS1	AzucenaRS1	Os128077RS1	IRGSP1.0	Os132278RS1	Os117425RS1	OglaRS2	ObarRS3	OgluRS3	OmerRS3
OrsajCp001	RPS12	small ribosomal protein	Pt	0	0	0	0	0	0	0	0	0	0	0	0	0	0	0	0	0	0	0	0
OrsajCp002	psbA	photosystem II	Pt	2	2	3	1	2	2	2	3	2	2	3	6	3	5	5	3	3	2	4	3
OrsajCp003	matK	clpP, matK, infA	Pt	1	1	2	1	1	1	1	1	1	1	2	5	2	4	5	2	2	1	3	2
OrsajCp004	RPS16	small ribosomal protein	Pt	0	0	0	0	0	0	0	0	0	0	0	3	0	1	2	1	0	0	3	2
OrsajCp005	psbK	photosystem II	Pt	2	0	1	1	1	2	0	0	1	1	1	7	2	5	5	3	0	0	6	2
OrsajCp006	psbI	photosystem II	Pt	3	1	2	2	2	3	1	1	2	3	2	8	4	5	6	4	2	1	8	3
OrsajCp007	ORF100	other ORF	Pt	1	0	1	1	1	1	0	1	1	2	1	8	4	3	4	4	0	0	9	2
OrsajCp008	psbD	photosystem II	Pt	2	0	1	1	2	1	0	2	2	2	1	8	4	5	6	4	0	0	8	2
OrsajCp009	psbC	photosystem II	Pt	2	2	1	0	1	1	1	2	1	1	0	8	4	5	6	4	1	1	7	3
OrsajCp010	psbZ	photosystem II	Pt	3	5	2	3	2	2	2	4	4	3	2	8	6	6	7	6	2	2	9	3
OrsajCp011	ORF91	other ORF	Pt	1	1	0	0	0	0	0	2	0	1	0	6	4	6	5	6	0	1	8	1
OrsajCp012	ORF70	other ORF	Pt	3	3	3	2	2	2	2	3	2	3	2	6	4	6	5	6	1	2	9	2
OrsajCp013	psbM	photosystem II	Pt	1	1	0	0	0	1	0	0	0	0	0	2	1	3	3	4	1	1	5	3
OrsajCp014	petN	cytochrome b/f complex	Pt	0	1	0	0	0	1	0	0	0	0	0	1	1	3	2	1	0	0	4	3
OrsajCp015	rpoB	RNA polymerase	Pt	0	0	0	0	0	1	0	0	0	0	0	1	1	2	1	1	0	0	4	4
OrsajCp016	rpoC1	RNA polymerase	Pt	1	2	2	2	2	3	2	3	2	3	1	3	2	4	3	2	0	2	5	3
OrsajCp017	rpoC2	RNA polymerase	Pt	1	0	0	1	0	1	1	1	0	1	0	0	0	2	0	0	0	0	3	2
OrsajCp018	RPS2	small ribosomal protein	Pt	2	1	3	2	2	2	2	4	1	3	1	2	3	5	3	2	0	0	4	3
OrsajCp019	atpI	ATP synthesis	Pt	1	0	1	1	1	1	1	2	0	2	0	1	1	2	0	0	0	0	5	2
OrsajCp020	atpH	ATP synthesis	Pt	1	0	0	1	0	1	1	1	0	2	1	2	1	1	1	1	0	0	3	1
OrsajCp021	atpF	ATP synthesis	Pt	0	1	1	0	0	1	0	0	0	1	1	2	1	3	2	1	0	0	1	2
OrsajCp022	atpA	ATP synthesis	Pt	1	2	2	0	1	2	0	1	1	1	2	3	1	3	2	1	1	1	2	3
OrsajCp023	RPS14	small ribosomal protein	Pt	1	2	2	1	1	4	0	1	1	1	2	2	1	3	1	0	0	0	3	3
OrsajCp024	psaB	photosystem I	Pt	1	2	2	0	2	1	0	3	2	1	2	3	2	4	2	1	0	0	4	2
OrsajCp025	psaA	photosystem I	Pt	2	3	1	2	3	2	0	4	2	2	3	3	3	5	3	1	0	1	3	2
OrsajCp026	YCF3	hypothetical reading frame (ycf)	Pt	1	1	1	1	1	1	1	2	1	2	3	2	2	5	6	1	1	1	5	3
OrsajCp027	RPS4	small ribosomal protein	Pt	0	0	0	0	0	2	0	1	0	3	1	1	2	4	4	1	2	3	5	2
OrsajCp028	ndhJ	NADH dehydrogenase	Pt	1	1	2	1	1	2	1	3	1	5	3	7	5	5	6	4	2	2	4	2
OrsajCp029	ndhK	NADH dehydrogenase	Pt	2	2	3	2	2	3	2	4	2	5	3	7	6	6	6	5	1	3	6	3
OrsajCp030	ndhC	NADH dehydrogenase	Pt	3	3	4	3	3	2	3	3	3	6	4	9	7	7	7	5	2	2	6	0
OrsajCp031	atpE	ATP synthesis	Pt	3	3	4	5	4	3	4	6	3	5	4	10	7	9	10	7	2	3	8	7
OrsajCp032	atpB	ATP synthesis	Pt	0	0	0	1	0	0	0	0	0	1	0	4	3	4	3	2	1	1	6	0
OrsajCp033	rbcL	RubisCO larg subunit	Pt	0	0	0	0	0	1	0	0	0	1	0	3	1	3	3	2	2	4	5	3
OrsajCp034	ORF42	other ORF	Pt	0	0	1	1	1	1	0	1	0	0	0	3	1	3	3	2	6	7	10	8
OrsajCp035	ORF133	other ORF	Pt	0	0	1	0	0	0	0	1	0	0	0	3	1	3	2	2	2	1	6	2
OrsajCp036	ORF106	other ORF	Pt	0	0	1	0	0	0	0	1	0	0	0	3	1	4	2	2	2	1	9	2
OrsajCp037	psaI	photosystem I	Pt	3	3	5	3	3	3	3	4	3	3	3	3	3	6	4	3	4	2	8	4
OrsajCp038	YCF4	hypothetical reading frame (ycf)	Pt	2	1	3	2	2	1	1	2	2	2	2	3	3	5	5	4	3	2	9	2
OrsajCp039	ORF85	other ORF	Pt	2	3	3	2	2	2	1	3	2	3	2	5	5	6	6	5	2	2	9	2
OrsajCp040	cemA	other ORF	Pt	1	1	2	1	1	1	1	1	1	2	1	3	3	5	4	3	2	1	7	2
OrsajCp041	petA	cytochrome b/f complex	Pt	1	1	1	1	1	1	1	1	1	2	1	4	4	7	5	4	1	1	7	1
OrsajCp042	psbJ	photosystem II	Pt	2	2	4	2	2	3	2	3	2	2	2	6	6	9	7	6	2	2	8	1
OrsajCp043	psbL	photosystem II	Pt	3	3	5	3	3	4	2	4	3	3	4	7	7	10	8	7	2	3	9	1
OrsajCp044	psbF	photosystem II	Pt	2	3	5	3	3	4	3	4	2	3	3	7	7	10	7	5	2	3	6	1
OrsajCp045	psbE	photosystem II	Pt	2	3	5	3	3	4	3	3	2	3	3	5	4	7	4	2	2	3	5	1
OrsajCp046	petL	cytochrome b/f complex	Pt	3	3	5	4	3	4	3	3	4	4	6	6	4	7	5	5	4	4	4	3
OrsajCp047	petG	cytochrome b/f complex	Pt	2	3	4	2	3	3	2	2	3	2	3	4	2	5	3	2	2	2	4	2
OrsajCp048	ORF44	other ORF	Pt	0	0	2	1	1	1	0	1	0	1	1	1	1	4	2	1	2	2	3	1
OrsajCp049	RPL33	large ribosomal protein	Pt	1	1	3	1	1	2	1	1	1	2	3	2	1	4	3	2	1	1	3	1
OrsajCp050	RPS18	small ribosomal protein	Pt	1	1	3	1	1	2	1	1	1	2	1	2	1	4	4	2	3	2	5	1
OrsajCp051	RPL20	large ribosomal protein	Pt	1	1	3	0	1	2	1	1	1	2	1	2	1	4	3	2	2	1	4	1
OrsajCp052	clpP	clpP, matK, infA	Pt	0	0	2	0	0	1	0	0	1	2	1	1	1	4	2	1	0	0	5	1
OrsajCp053	psbB	photosystem II	Pt	0	0	1	0	0	1	0	1	1	3	1	1	1	5	3	2	2	3	6	3
OrsajCp054	psbT	photosystem II	Pt	0	0	1	0	0	1	1	1	1	2	1	3	1	7	5	2	3	4	7	3
OrsajCp055	psbN	photosystem II	Pt	1	1	2	1	1	2	2	2	2	3	2	5	2	9	7	4	4	5	7	6
OrsajCp056	psbH	photosystem II	Pt	0	0	2	0	0	0	0	1	1	2	1	4	2	6	4	2	2	2	4	3
OrsajCp057	petB	cytochrome b/f complex	Pt	0	0	1	0	0	0	0	0	0	0	0	1	0	4	2	0	1	2	4	3
OrsajCp058	petD	cytochrome b/f complex	Pt	0	0	1	0	0	0	0	1	0	1	0	3	2	6	4	2	2	1	2	2
OrsajCp059	rpoA	RNA polymerase	Pt	0	0	2	1	2	2	2	2	0	1	0	2	2	6	4	2	1	1	3	1
OrsajCp060	RPS11	small ribosomal protein	Pt	1	1	3	2	3	3	3	3	1	2	1	3	3	8	5	3	2	3	4	3
OrsajCp061	RPL36	large ribosomal protein	Pt	1	1	4	2	3	3	3	3	1	2	1	3	4	7	5	3	2	3	5	3
OrsajCp062	infA	clpP, matK, infA	Pt	2	1	5	3	4	4	3	4	2	3	2	5	4	10	7	3	3	4	5	6
OrsajCp063	RPS8	small ribosomal protein	Pt	4	2	6	4	4	4	3	5	3	4	3	6	5	11	8	4	4	5	7	3
OrsajCp064	RPL14	large ribosomal protein	Pt	3	1	4	3	3	3	2	4	2	4	3	7	4	10	7	3	3	4	8	3
OrsajCp065	RPL16	large ribosomal protein	Pt	2	1	3	3	3	3	2	3	2	3	3	5	2	9	5	1	3	3	6	2
OrsajCp066	RPS3	small ribosomal protein	Pt	1	1	3	2	3	2	2	2	1	5	5	6	2	6	4	2	4	4	6	2
OrsajCp067	RPL22	large ribosomal protein	Pt	2	2	4	3	4	3	3	3	2	6	6	6	3	7	6	3	4	4	5	4
OrsajCp068	ORF82	other ORF	Pt	4	4	8	6	6	7	6	7	4	8	9	11	7	13	11	7	11	11	12	11
OrsajCp069	RPL2	large ribosomal protein	Pt	0	0	2	1	1	1	0	1	1	4	5	9	2	9	7	3	4	5	7	8
OrsajCp070	ORF137	other ORF	Pt	4	4	7	5	6	6	5	7	5	7	9	12	5	12	10	6	9	10	11	9
OrsajCp071	RPL23	large ribosomal protein	Pt	2	3	3	3	4	4	4	5	4	6	5	11	2	10	7	5	3	2	7	9
OrsajCp072	ORF28	other ORF	Pt	2	4	5	4	5	4	4	5	4	8	7	13	3	10	9	5	4	4	10	9
OrsajCp074	ORF249	other ORF	Pt	3	3	4	4	4	4	4	4	4	5	5	8	1	7	5	2	3	3	6	7
OrsajCp075	ndhB	NADH dehydrogenase	Pt	5	4	4	5	4	4	4	4	3	3	3	4	2	9	7	2	1	1	8	5
OrsajCp076	RPS7	small ribosomal protein	Pt	2	1	3	2	3	3	3	2	1	3	3	7	2	11	10	2	2	2	8	6
OrsajCp077	ORF72	other ORF	Pt	3	2	5	4	5	6	5	4	2	5	3	8	6	14	10	5	5	5	9	10
OrsajCp078	ORF85	other ORF	Pt	3	2	6	3	5	6	5	4	2	5	2	8	6	14	10	4	4	3	7	10
OrsajCp079	ORF133	other ORF	Pt	2	4	8	4	4	4	4	6	17	8	5	7	6	9	10	4	0	0	7	7
OrsajCp080	ORF109	other ORF	Pt	3	3	10	5	3	5	6	8	2	9	6	8	5	8	12	4	0	0	6	7
OrsajCp081	ORF23	other ORF	Pt	1	1	6	2	2	4	3	6	1	11	7	9	8	11	12	7	2	3	9	6
OrsajCp082	ORF63	other ORF	Pt	2	2	8	3	3	5	5	6	3	12	7	10	8	9	12	6	3	2	9	4
OrsajCp083	RPS15	small ribosomal protein	Pt	2	1	7	2	2	4	5	6	4	9	5	6	6	6	9	5	2	1	9	1
OrsajCp084	ORF56	other ORF	Pt	3	2	9	4	3	4	6	7	4	9	5	6	5	6	9	4	3	1	7	0
OrsajCp085	ndhF	NADH dehydrogenase	Pt	2	1	4	2	1	1	3	2	1	2	2	1	1	3	3	1	1	0	2	0
OrsajCp086	RPL32	large ribosomal protein	Pt	2	1	3	2	1	1	3	2	1	3	2	2	2	3	3	2	1	0	3	2
OrsajCp087	ccsA	other ORF	Pt	2	1	3	2	1	1	2	2	1	4	3	3	3	4	4	2	0	0	3	1
OrsajCp088	ndhD	NADH dehydrogenase	Pt	1	0	2	1	0	1	2	2	0	4	1	4	3	4	5	2	0	0	5	1
OrsajCp089	psaC	photosystem I	Pt	3	1	4	3	1	2	4	4	1	5	3	5	4	5	6	3	2	1	7	2
OrsajCp090	ndhE	NADH dehydrogenase	Pt	3	1	5	3	1	2	5	5	1	10	5	6	4	4	6	4	3	2	7	2
OrsajCp091	ndhG	NADH dehydrogenase	Pt	3	2	5	3	1	1	4	3	2	3	1	5	4	6	5	4	1	0	7	1
OrsajCp092	ndhI	NADH dehydrogenase	Pt	3	2	6	3	1	2	5	5	2	4	2	4	5	4	5	4	1	0	6	1
OrsajCp093	ndhA	NADH dehydrogenase	Pt	1	2	4	1	1	2	3	3	2	4	2	5	5	4	6	4	1	0	5	0
OrsajCp094	ndhH	NADH dehydrogenase	Pt	1	1	5	2	1	3	4	4	2	5	3	4	4	4	7	3	1	0	4	0
OrsajCr113	OrsajCr113	ribosomal RNA	Pt	1	1	5	2	3	2	4	3	1	3	3	4	3	9	10	1	1	1	8	6
OrsajCr114	OrsajCr114	ribosomal RNA	Pt	0	0	3	1	0	2	1	2	0	5	5	6	3	6	9	3	0	0	4	2
OrsajCr115	OrsajCr115	ribosomal RNA	Pt	1	1	6	1	2	2	2	5	1	9	7	11	7	11	12	7	1	1	7	8
OrsajCr116	OrsajCr116	ribosomal RNA	Pt	3	2	7	3	3	5	4	7	2	10	7	11	8	12	13	8	2	3	9	6
OrsajCt121	trnK	tRNA	Pt	1	1	1	1	1	1	1	1	1	1	1	4	1	3	4	2	2	1	2	2
OrsajCt122	trnQ	tRNA	Pt	3	3	3	3	2	3	2	2	2	3	3	6	2	5	4	2	2	2	8	3
OrsajCt123	trnS	tRNA	Pt	5	3	4	4	3	4	3	3	4	5	4	10	6	7	8	6	5	4	11	3
OrsajCt124	trnS	tRNA	Pt	3	3	1	3	3	1	2	3	2	2	1	10	8	8	7	6	2	2	9	4
OrsajCt125	trnG	tRNA	Pt	3	3	1	1	2	0	0	3	3	2	1	7	5	5	6	5	4	4	9	3
OrsajCt126	trnG	tRNA	Pt	4	4	2	3	3	2	2	5	3	3	2	6	3	5	5	5	2	2	7	3
OrsajCt127	trnfM	tRNA	Pt	1	1	1	1	2	0	0	3	2	1	1	7	4	6	6	5	3	2	7	3
OrsajCt128	trnG	tRNA	Pt	0	0	0	0	0	0	0	0	0	0	0	0	0	0	0	0	0	0	0	0
OrsajCt129	trnI	tRNA	Pt	1	1	0	0	0	0	0	2	0	1	0	6	4	6	5	6	0	1	8	1
OrsajCt130	trnT	tRNA	Pt	2	4	3	2	2	2	1	3	2	3	2	6	4	6	5	6	2	2	5	1
OrsajCt131	trnT	tRNA	Pt	2	4	3	2	2	2	1	3	2	3	2	6	4	6	5	6	2	2	5	1
OrsajCt132	trnE	tRNA	Pt	1	2	0	1	1	3	0	1	0	1	0	5	3	5	5	6	1	1	5	2
OrsajCt133	trnY	tRNA	Pt	2	3	1	1	1	2	1	2	1	1	0	5	3	6	5	6	1	1	5	2
OrsajCt134	trnD	tRNA	Pt	2	4	2	3	1	3	0	2	1	2	2	6	3	6	6	7	2	2	5	3
OrsajCt135	trnC	tRNA	Pt	4	5	2	3	3	3	2	3	5	4	4	1	1	4	2	2	3	4	6	8
OrsajCt136	trnR	tRNA	Pt	2	3	4	2	3	4	1	2	2	3	4	4	2	5	4	2	1	2	4	5
OrsajCt137	trnS	tRNA	Pt	1	1	1	1	2	2	1	1	1	3	2	0	1	4	4	0	2	3	6	6
OrsajCt138	trnT	tRNA	Pt	1	1	1	1	4	0	1	2	1	3	2	5	6	9	8	5	3	1	5	2
OrsajCt139	trnL	tRNA	Pt	1	1	1	1	1	0	1	2	1	3	2	2	3	5	4	2	2	0	4	1
OrsajCt140	trnF	tRNA	Pt	2	2	2	2	2	3	2	4	2	5	2	5	4	7	6	3	5	3	5	3
OrsajCt141	trnV	tRNA	Pt	3	3	5	5	3	2	4	4	4	5	3	6	5	8	7	6	2	3	6	7
OrsajCt142	trnM	tRNA	Pt	3	4	4	5	4	3	4	6	3	6	6	11	8	10	13	8	4	7	7	7
OrsajCt143	trnW	tRNA	Pt	1	1	3	2	1	2	1	2	1	1	3	3	1	5	3	2	4	5	3	4
OrsajCt144	trnP	tRNA	Pt	3	3	5	3	3	4	3	3	2	3	4	3	3	5	4	2	4	8	3	4
OrsajCt145	trnH	tRNA	Pt	5	4	9	6	7	8	7	8	5	8	9	12	7	14	12	7	11	11	13	12
OrsajCt146	trnI	tRNA	Pt	2	2	3	3	3	3	3	4	3	5	4	10	1	8	6	4	3	2	8	9
OrsajCt147	trnL	tRNA	Pt	7	6	9	7	7	7	7	7	7	8	8	12	5	12	10	6	5	8	11	7
OrsajCt148	trnV	tRNA	Pt	3	3	7	4	6	7	7	6	3	7	4	10	6	14	12	7	4	3	9	11
OrsajCt149	OrsajCt149	tRNA	Pt	2	3	8	3	3	4	4	5	2	7	3	6	5	8	9	3	0	0	7	5
OrsajCt150	OrsajCt150	tRNA	Pt	3	3	10	5	3	5	6	7	2	8	5	6	5	8	10	3	0	0	6	6
OrsajCt151	OrsajCt151	tRNA	Pt	2	2	7	3	3	6	4	7	2	11	8	9	8	11	12	7	3	5	10	7
OrsajCt152	OrsajCt152	tRNA	Pt	4	3	8	5	6	8	6	8	5	14	9	13	10	13	15	10	5	5	10	4
OrsajCt153	OrsajCt153	tRNA	Mt	3	2	3	2	1	1	3	3	2	5	4	3	3	4	4	2	1	0	4	4
OrsajM_p01	NAD1	complex I (NADH dehydrogenase)	Mt	0	0	0	0	0	0	0	0	0	0	0	0	0	0	0	0	0	0	0	0
OrsajM_p02	cox3	complex IV (cytochrome c oxidase)	Mt	0	0	0	0	0	0	0	0	0	0	0	0	0	0	1	0	0	2	1	0
OrsajM_p03	ORF25	other ORF	Mt	0	0	0	1	0	0	0	0	0	0	0	1	1	1	2	0	0	2	1	0
OrsajM_p04	ORF152a	other ORF	Mt	0	0	0	1	0	0	0	0	0	0	0	1	1	1	2	0	0	2	1	1
OrsajM_p05	NAD5	complex I (NADH dehydrogenase)	Mt	0	0	0	0	0	0	0	0	0	0	0	0	0	0	0	0	0	0	0	0
OrsajM_p06	RPS7	small ribosomal protein	Mt	1	2	1	1	1	2	1	1	1	1	2	1	1	2	5	1	1	3	1	1
OrsajM_p07	ORF490	other ORF	Mt	1	2	1	1	1	1	1	1	1	1	2	1	1	2	4	1	1	3	1	1
OrsajM_p08	ORF258	other ORF	Mt	1	1	1	1	1	1	1	1	1	1	2	1	1	2	4	1	1	3	1	1
OrsajM_p09	ORFB	other ORF	Mt	0	0	0	0	0	0	0	0	0	0	1	1	0	1	3	0	1	3	0	1
OrsajM_p10	ORF181	other ORF	Mt	0	1	0	0	0	0	0	1	0	0	1	1	0	2	4	0	1	3	0	1
OrsajM_p11	NAD6	complex I (NADH dehydrogenase)	Mt	0	0	0	0	0	1	0	0	0	0	1	1	0	1	3	0	0	2	0	1
OrsajM_p12	ccmC	cytochrome c maturation	Mt	0	0	0	0	0	1	0	0	0	0	1	1	0	1	3	0	0	2	0	1
OrsajM_p13	ORF183	other ORF	Mt	0	0	0	0	0	1	0	0	0	0	1	1	0	1	3	0	1	3	0	1
OrsajM_p14	ORFX	other ORF	Mt	0	0	0	0	0	0	0	1	0	0	1	0	0	1	3	0	2	4	1	0
OrsajM_p15	NAD7	complex I (NADH dehydrogenase)	Mt	0	0	0	0	0	0	0	0	0	0	0	0	0	1	2	0	0	2	1	0
OrsajM_p16	ORF288	other ORF	Mt	0	1	0	0	0	0	0	0	0	0	0	0	0	0	0	0	0	0	0	0
OrsajM_p17	ORF194	other ORF	Mt	1	1	0	1	1	0	0	0	1	0	0	0	0	2	3	0	1	2	0	0
OrsajM_p18	RPS3	small ribosomal protein	Mt	1	1	0	1	1	0	0	0	1	0	0	0	0	2	3	0	1	1	0	0
OrsajM_p19	RPL16	large ribosomal protein	Mt	1	1	0	1	1	0	0	0	1	0	0	0	0	2	3	0	1	1	1	0
OrsajM_p20	NAD3	complex I (NADH dehydrogenase)	Mt	1	1	0	1	1	0	0	0	1	0	0	0	0	2	3	0	1	1	1	1
OrsajM_p21	RPS12	small ribosomal protein	Mt	1	1	0	1	1	0	0	0	1	0	0	0	0	3	4	0	1	1	1	2
OrsajM_p22	ORF224	other ORF	Mt	1	1	0	1	1	0	0	0	1	0	0	0	0	4	5	0	2	1	1	0
OrsajM_p23	RPS2	small ribosomal protein	Mt	0	0	0	0	0	0	0	0	0	0	0	0	0	3	4	0	0	0	0	0
OrsajM_p24	NAD4	complex I (NADH dehydrogenase)	Mt	0	0	0	0	0	0	0	0	0	0	0	0	0	0	0	0	0	0	0	0
OrsajM_p25	cox2	complex IV (cytochrome c oxidase)	Mt	1	2	0	1	1	0	0	0	1	0	0	0	0	0	1	0	4	2	1	0
OrsajM_p26	ORF161	other ORF	Mt	1	2	0	2	1	0	0	0	1	0	0	1	1	2	3	0	3	1	1	0
OrsajM_p27	ORF152b	other ORF	Mt	3	3	3	2	4	1	2	4	3	2	1	0	0	2	3	0	2	0	0	1
OrsajM_p28	ORF187	other ORF	Mt	5	6	5	4	6	4	4	7	5	5	3	2	2	4	5	2	5	3	5	3
OrsajM_p29	atp6	ATP synthase	Mt	0	1	0	0	0	2	0	2	0	0	0	0	1	1	1	1	1	0	0	0
OrsajM_p30	ORF153	other ORF	Mt	0	0	0	0	0	1	0	0	0	0	0	0	0	0	0	0	0	0	0	0
OrsajM_p31	RPS13	small ribosomal protein	Mt	1	0	0	0	0	1	0	0	0	0	0	0	0	0	0	0	0	0	0	1
OrsajM_p32	RPS4	small ribosomal protein	Mt	0	0	0	0	0	0	0	0	0	0	0	1	0	0	1	0	0	1	0	1
OrsajM_p33	RPS11	small ribosomal protein	Mt	1	1	1	1	1	1	1	1	1	1	0	1	0	0	1	0	0	2	0	2
OrsajM_p34	ORF176	other ORF	Mt	1	1	1	2	1	1	1	1	1	1	0	2	1	2	3	0	0	2	0	1
OrsajM_p35	atp9	ATP synthase	Mt	2	2	2	1	2	1	2	2	2	1	0	1	0	1	2	0	1	3	1	0
OrsajM_p36	RPL2	large ribosomal protein	Mt	0	0	0	0	0	0	0	0	1	1	0	0	0	0	0	0	0	1	0	1
OrsajM_p37	RPS19	small ribosomal protein	Mt	1	0	0	0	0	0	0	0	1	1	0	0	0	0	0	0	0	1	0	2
OrsajM_p38	NAD4L	complex I (NADH dehydrogenase)	Mt	1	0	0	0	0	0	0	0	1	1	0	0	0	0	0	0	0	1	0	2
OrsajM_p39	ORF241	other ORF	Mt	2	1	1	1	1	1	1	1	1	2	1	1	1	1	1	1	1	2	1	3
OrsajM_p40	cob	complex III (ubichinol cytochrome c reductase)	Mt	0	0	0	0	0	0	0	0	0	1	0	0	0	0	0	0	0	1	0	3
OrsajM_p41	mat-r	RNA maturase protein	Mt	1	1	1	0	1	1	0	0	0	1	0	0	0	0	0	0	0	0	0	1
OrsajM_p42	RPS1	small ribosomal protein	Mt	1	1	1	0	1	1	0	0	0	1	0	0	0	0	0	0	0	1	0	2
OrsajM_p43	ccmFn	cytochrome c maturation	Mt	1	1	1	0	1	1	0	0	0	1	0	0	0	0	0	0	0	0	0	1
OrsajM_p44	ccmFc	cytochrome c maturation	Mt	1	1	1	0	1	1	0	0	0	2	0	0	0	0	0	0	0	0	0	0
OrsajM_p45	ORF165	other ORF	Mt	0	0	0	0	0	1	0	1	0	3	1	0	0	2	2	0	1	1	0	1
OrsajM_p46	ORF284	other ORF	Mt	0	0	0	0	0	1	0	1	0	3	1	0	0	2	2	0	1	1	0	1
OrsajM_p47	cox1	complex IV (cytochrome c oxidase)	Mt	1	0	0	0	0	1	0	0	0	3	0	0	0	1	1	0	1	1	0	1
OrsajM_p48	RPS14	small ribosomal protein	Mt	0	1	0	0	0	1	0	1	0	3	1	0	0	1	1	0	0	2	0	1
OrsajM_p49	RPL5	large ribosomal protein	Mt	0	1	0	0	0	0	0	1	0	3	1	0	0	1	1	0	0	1	0	1
OrsajM_p50	atp1	ATP synthase	Mt	0	0	0	0	0	0	0	1	0	2	1	0	0	1	1	0	0	0	0	0
OrsajM_p51	NAD9	complex I (NADH dehydrogenase)	Mt	0	0	0	0	0	2	0	1	0	1	0	1	1	1	1	1	0	2	0	2
OrsajM_p52	NAD2	complex I (NADH dehydrogenase)	Mt	0	0	0	0	0	0	0	0	0	0	0	0	0	0	0	0	0	0	0	0
OrsajM_p53	ORF173	other ORF	Mt	1	1	1	1	1	1	1	2	1	2	1	2	2	2	2	2	1	3	1	1
OrsajM_p54	ORF162	other ORF	Mt	0	1	0	1	0	0	0	1	0	1	0	1	1	1	1	1	2	1	0	0
OrsajM_p55	ccmB	cytochrome c maturation	Mt	1	1	0	1	1	0	0	0	1	0	0	0	0	0	0	0	0	1	0	3
OrsajM_p56	ORF160	other ORF	Mt	0	0	1	0	1	0	0	1	0	1	1	0	0	1	1	0	0	1	0	0
OrsajM_r01	RRN5	ribosomal RNA	Mt	4	5	5	2	5	4	4	4	4	4	3	2	2	3	4	2	5	7	2	3
OrsajM_r02	RRN18	ribosomal RNA	Mt	2	3	3	1	3	1	2	2	2	2	1	0	0	1	1	0	3	4	1	2
OrsajM_r03	RRN26	ribosomal RNA	Mt	0	0	0	0	0	0	0	0	0	1	0	0	0	0	0	0	1	0	0	0
OrsajM_t01	trnP	tRNA	Mt	0	1	0	0	0	0	0	0	0	0	0	0	0	0	1	0	0	2	4	1
OrsajM_t02	trnV	tRNA	Mt	2	2	2	4	2	0	1	1	2	5	2	6	6	10	6	4	1	3	6	3
OrsajM_t03	trnM	tRNA	Mt	3	4	4	5	4	3	4	6	3	6	6	11	8	10	13	8	4	7	7	7
OrsajM_t04	trnH	tRNA	Mt	5	4	9	6	7	8	7	8	5	8	9	12	7	14	12	7	11	11	13	12
OrsajM_t05	trnP	tRNA	Mt	1	1	3	1	2	2	1	2	1	2	3	2	1	4	3	1	2	5	1	5
OrsajM_t06	trnW	tRNA	Mt	1	1	3	2	1	2	1	2	1	0	3	2	0	4	2	1	3	5	3	4
OrsajM_t07	trnQ	tRNA	Mt	1	3	1	1	1	1	1	1	2	2	3	2	1	3	5	1	1	4	1	1
OrsajM_t08	trnM	tRNA	Mt	3	4	4	4	4	3	4	6	3	6	6	11	8	10	13	8	3	6	6	6
OrsajM_t09	trnI	tRNA	Mt	0	0	0	0	0	1	0	0	0	0	1	1	0	1	3	0	0	2	0	1
OrsajM_t10	trnI	tRNA	Mt	0	0	0	1	1	1	0	1	0	0	1	1	0	1	3	0	1	1	0	2
OrsajM_t11	trnD	tRNA	Mt	0	0	0	1	1	1	0	1	0	0	1	1	0	1	3	0	1	1	0	1
OrsajM_t12	trnN	tRNA	Mt	1	1	1	2	2	2	1	2	1	0	1	1	0	1	2	0	1	1	1	1
OrsajM_t13	trnK	tRNA	Mt	1	1	2	1	2	3	2	2	2	1	2	0	0	1	3	0	1	2	1	0
OrsajM_t14	trnfM	tRNA	Mt	2	3	1	2	2	1	0	1	2	0	0	1	0	3	5	0	2	1	0	1
OrsajM_t15	trnS	tRNA	Mt	3	3	3	1	3	2	3	3	3	2	1	2	1	2	3	1	1	5	0	1
OrsajM_t16	trnS	tRNA	Mt	1	0	1	0	0	1	0	1	1	3	1	0	1	2	2	0	3	3	0	0
OrsajM_t17	trnS	tRNA	Mt	1	1	1	1	2	2	1	1	1	3	2	0	1	4	4	0	2	3	6	6
OrsajM_t18	trnF	tRNA	Mt	2	2	2	2	2	3	2	4	2	5	2	5	4	7	5	3	5	3	5	3
OrsajM_t19	trnY	tRNA	Mt	0	0	0	0	0	2	0	1	0	1	0	1	1	1	1	1	0	2	0	2
OrsajM_t20	trnE	tRNA	Mt	0	0	0	0	0	0	0	0	0	1	0	0	0	0	0	1	2	2	0	0
OrsajM_t21	trnC	tRNA	Mt	4	5	2	3	3	3	2	3	5	4	4	1	1	4	2	2	3	4	6	8
OrsajM_t22	trnR	tRNA	Mt	2	3	4	2	3	4	1	2	2	3	4	4	2	5	4	2	1	2	4	5
