# Supplementary material for: Continuous infiltration and evolutionary trajectory of nuclear organelle DNA inOryza
Source: HighWire-hosted journal article supplement (doi:10.1101/gr.279609.124), 2025-04-25
Supplement: Supplemental_Table_S8.xlsx [file Supplemental_Table_S8.xlsx]

## Sheet: Supplementary Table 8
Supplemental Table 8. Formation mechanisms of 828 ONGs.
ONG ID	Target site duplication (bp)	Deletion (bp)	Microhomology (>0) or filler (<0) in left junction site (bp)	Microhomology (>0) or filler (<0) in right junction site (bp)	Mechanism	Mechanism in left junction site	Mechanism in right junction site
ONG1000590	0	0	-1	9	DSBR	c-NHEJ	alt-EJ or template-switch
ONG0800750	0	8	1	0	DSBR	c-NHEJ	c-NHEJ
ONG0101270	1	0	0	-5	DSBR	c-NHEJ	c-NHEJ
ONG0101280	0	120	-7	1	MMBIR	RBM	RBM
ONG0101010	0	24	0	1	MMBIR	RBM	RBM
ONG0900590	20	0	2	3	DSBR	c-NHEJ	c-NHEJ
ONG1100880	0	3	0	-1	DSBR	c-NHEJ	c-NHEJ
ONG1200830	0	30	-10	-23	MMBIR	RBM	RBM
ONG0101290	77	0	-46	-172	MMBIR	RBM	RBM
ONG0900600	0	4667	1	1	MMBIR	RBM	RBM
ONG1000610	1	0	1	2	DSBR	c-NHEJ	c-NHEJ
ONG1000620	0	18	0	-4	MMBIR	RBM	RBM
ONG0101310	0	7	-37	6	DSBR	filler	alt-EJ or template-switch
ONG1200850	0	2	1	1	DSBR	c-NHEJ	c-NHEJ
ONG0101040	3	0	1	0	DSBR	c-NHEJ	c-NHEJ
ONG0101320	0	0	-3	1	DSBR	c-NHEJ	c-NHEJ
ONG0101330	0	3	2	-1	DSBR	c-NHEJ	c-NHEJ
ONG0301060	0	0	1	4	DSBR	c-NHEJ	c-NHEJ
ONG0600850	0	1	-1	-46	DSBR	c-NHEJ	filler
ONG0101340	0	1	5	1	DSBR	alt-EJ or template-switch	c-NHEJ
ONG0200990	2	0	4	-1	DSBR	c-NHEJ	c-NHEJ
ONG0900630	3	0	1	1	DSBR	c-NHEJ	c-NHEJ
ONG0900640	16	0	0	18	DSBR	c-NHEJ	alt-EJ or template-switch
ONG0301080	3	0	-46	0	DSBR	filler	c-NHEJ
ONG0400970	0	54	2	-1	MMBIR	RBM	RBM
ONG0800760	7	0	-58	6	DSBR	filler	alt-EJ or template-switch
ONG0900650	0	1	6	-4	DSBR	alt-EJ or template-switch	c-NHEJ
ONG1000630	0	2	0	0	DSBR	c-NHEJ	c-NHEJ
ONG1000640	0	18	0	-1	MMBIR	RBM	RBM
ONG0900660	0	1	-3	4	DSBR	c-NHEJ	c-NHEJ
ONG0301090	1	0	0	2	DSBR	c-NHEJ	c-NHEJ
ONG0500700	0	1253	-1	3	MMBIR	RBM	RBM
ONG0700730	1	0	5	-106	DSBR	alt-EJ or template-switch	filler
ONG0700740	2	0	3	1	DSBR	c-NHEJ	c-NHEJ
ONG0700750	3	0	1	1	DSBR	c-NHEJ	c-NHEJ
ONG1200880	6	0	-31	0	DSBR	filler	c-NHEJ
ONG0101370	3	0	-41	-77	DSBR	filler	filler
ONG0101380	0	1	0	0	DSBR	c-NHEJ	c-NHEJ
ONG0900670	0	947	-636	-60	MMBIR	RBM	RBM
ONG1200890	4	0	1	4	DSBR	c-NHEJ	c-NHEJ
ONG0100110	0	24	-6	-1	MMBIR	RBM	RBM
ONG0400990	10	0	11	0	DSBR	alt-EJ or template-switch	c-NHEJ
ONG1000660	16	0	2	1	DSBR	c-NHEJ	c-NHEJ
ONG0900680	0	6	0	2	DSBR	c-NHEJ	c-NHEJ
ONG1200900	0	48	0	3	MMBIR	RBM	RBM
ONG0301120	0	2	1	2	DSBR	c-NHEJ	c-NHEJ
ONG0301140	3	0	-132	-2	DSBR	filler	c-NHEJ
ONG0201010	0	25	1	1	MMBIR	RBM	RBM
ONG0600900	0	3	0	0	DSBR	c-NHEJ	c-NHEJ
ONG1000690	0	1	0	1	DSBR	c-NHEJ	c-NHEJ
ONG0201020	9	0	-1	-36	DSBR	c-NHEJ	filler
ONG0201030	0	4	1	1	DSBR	c-NHEJ	c-NHEJ
ONG0800800	1	0	1	1	DSBR	c-NHEJ	c-NHEJ
ONG0301150	0	66	-55	-2	MMBIR	RBM	RBM
ONG0401010	849	0	-3	-27	MMBIR	RBM	RBM
ONG0600910	11	0	-51	1	DSBR	filler	c-NHEJ
ONG0800810	1	0	0	0	DSBR	c-NHEJ	c-NHEJ
ONG0101150	0	0	0	0	DSBR	c-NHEJ	c-NHEJ
ONG1100970	0	22	-3	0	MMBIR	RBM	RBM
ONG0101410	9	0	0	2	DSBR	c-NHEJ	c-NHEJ
ONG0101160	0	1	0	0	DSBR	c-NHEJ	c-NHEJ
ONG0301170	8	0	5	-2	DSBR	alt-EJ or template-switch	c-NHEJ
ONG0101170	0	2	2	5	DSBR	c-NHEJ	alt-EJ or template-switch
ONG0500720	0	1812	-78	-118	MMBIR	RBM	RBM
ONG1200950	0	11	5	-4	MMBIR	RBM	RBM
ONG0600930	1	0	1	0	DSBR	c-NHEJ	c-NHEJ
ONG0500730	0	7	3	0	DSBR	c-NHEJ	c-NHEJ
ONG0301180	0	14	6	1	MMBIR	RBM	RBM
ONG0500740	0	488	1	-18	MMBIR	RBM	RBM
ONG1100990	0	41	-32	-16	MMBIR	RBM	RBM
ONG1200960	0	29	1	4	MMBIR	RBM	RBM
ONG1101010	13	0	-3	3	DSBR	c-NHEJ	c-NHEJ
ONG0301210	0	0	1	5	DSBR	c-NHEJ	alt-EJ or template-switch
ONG0900700	0	17	3	-99	MMBIR	RBM	RBM
ONG0700830	1	0	0	0	DSBR	c-NHEJ	c-NHEJ
ONG0401080	1	0	-125	0	DSBR	filler	c-NHEJ
ONG0700840	0	6	0	1	DSBR	c-NHEJ	c-NHEJ
ONG0900710	0	4	1	-4	DSBR	c-NHEJ	c-NHEJ
ONG0101470	54	0	-571	-51	MMBIR	RBM	RBM
ONG0800830	29	0	-22	-33	MMBIR	RBM	RBM
ONG1000700	5	0	1	-3	DSBR	c-NHEJ	c-NHEJ
ONG0600980	0	31	1	-1	MMBIR	RBM	RBM
ONG1000710	1	0	2	4	DSBR	c-NHEJ	c-NHEJ
ONG0900730	0	84	-9	-20	MMBIR	RBM	RBM
ONG0900740	0	0	1	1	DSBR	c-NHEJ	c-NHEJ
ONG0401110	0	1	0	2	DSBR	c-NHEJ	c-NHEJ
ONG1200980	1	0	4	1	DSBR	c-NHEJ	c-NHEJ
ONG0600770	0	237	-5	4	MMBIR	RBM	RBM
ONG0401130	0	144	0	-427	MMBIR	RBM	RBM
ONG1000740	0	5	-1	1	DSBR	c-NHEJ	c-NHEJ
ONG1101070	0	1	1	1	DSBR	c-NHEJ	c-NHEJ
ONG0301240	3	0	1	3	DSBR	c-NHEJ	c-NHEJ
ONG1101150	0	5	7	8	DSBR	alt-EJ or template-switch	alt-EJ or template-switch
ONG1201000	0	0	1	1	DSBR	c-NHEJ	c-NHEJ
ONG0301250	0	491	-61	4	MMBIR	RBM	RBM
ONG0101490	0	4	-37	4	DSBR	filler	c-NHEJ
ONG0500760	0	6	2	3	DSBR	c-NHEJ	c-NHEJ
ONG1101180	0	27	-12	0	MMBIR	RBM	RBM
ONG1101190	0	0	1	0	DSBR	c-NHEJ	c-NHEJ
ONG0601000	10	0	-17	-591	DSBR	filler	filler
ONG0401150	0	4	1	2	DSBR	c-NHEJ	c-NHEJ
ONG0101500	0	7	0	0	DSBR	c-NHEJ	c-NHEJ
ONG0900780	0	34	2	3	MMBIR	RBM	RBM
ONG1201010	4	0	-7	2	DSBR	filler	c-NHEJ
ONG1201020	2	0	1	0	DSBR	c-NHEJ	c-NHEJ
ONG0200060	0	17	-357	-33	MMBIR	RBM	RBM
ONG0900800	6	0	2	1	DSBR	c-NHEJ	c-NHEJ
ONG1000770	1	0	1	1	DSBR	c-NHEJ	c-NHEJ
ONG0200070	0	1	-2	4	DSBR	c-NHEJ	c-NHEJ
ONG1101260	9	0	9	-1	DSBR	alt-EJ or template-switch	c-NHEJ
ONG1000780	1	0	0	-1	DSBR	c-NHEJ	c-NHEJ
ONG1101270	4	0	0	0	DSBR	c-NHEJ	c-NHEJ
ONG0101530	0	1	-1	0	DSBR	c-NHEJ	c-NHEJ
ONG0301260	5	0	2	-60	DSBR	c-NHEJ	filler
ONG0700860	0	8	0	4	DSBR	c-NHEJ	c-NHEJ
ONG0500770	0	1600	-1090	-63	MMBIR	RBM	RBM
ONG0700870	0	0	1	0	DSBR	c-NHEJ	c-NHEJ
ONG0800880	0	6	0	0	DSBR	c-NHEJ	c-NHEJ
ONG0700880	0	0	6	0	DSBR	alt-EJ or template-switch	c-NHEJ
ONG0101540	9	0	3	0	DSBR	c-NHEJ	c-NHEJ
ONG0601060	0	84	0	0	MMBIR	RBM	RBM
ONG1201050	0	3	3	1	DSBR	c-NHEJ	c-NHEJ
ONG0101550	0	107	-8	-8	MMBIR	RBM	RBM
ONG0800890	0	8	-2	2	DSBR	c-NHEJ	c-NHEJ
ONG0201150	0	0	5	-1	DSBR	alt-EJ or template-switch	c-NHEJ
ONG0800900	7	0	1	0	DSBR	c-NHEJ	c-NHEJ
ONG0601070	1	0	2	1	DSBR	c-NHEJ	c-NHEJ
ONG0601080	0	7	-48	0	DSBR	filler	c-NHEJ
ONG1201060	0	0	0	2	DSBR	c-NHEJ	c-NHEJ
ONG1101300	0	1	3	2	DSBR	c-NHEJ	c-NHEJ
ONG1201070	2	0	11	2	DSBR	alt-EJ or template-switch	c-NHEJ
ONG0800910	4	0	-58	0	DSBR	filler	c-NHEJ
ONG0101560	1	0	0	-3	DSBR	c-NHEJ	c-NHEJ
ONG0201160	4	0	3	1	DSBR	c-NHEJ	c-NHEJ
ONG0301280	1	0	0	-1	DSBR	c-NHEJ	c-NHEJ
ONG0900810	0	1	-7	3	DSBR	filler	c-NHEJ
ONG1000820	0	59	8	2	MMBIR	RBM	RBM
ONG0101570	0	10	-5	1	DSBR	c-NHEJ	c-NHEJ
ONG0101580	0	3	3	2	DSBR	c-NHEJ	c-NHEJ
ONG0101590	0	417	3	-23	MMBIR	RBM	RBM
ONG0101600	0	240	1	1	MMBIR	RBM	RBM
ONG1000840	0	1	1	-1	DSBR	c-NHEJ	c-NHEJ
ONG0200140	0	0	1	2	DSBR	c-NHEJ	c-NHEJ
ONG1000860	5	0	5	2	DSBR	alt-EJ or template-switch	c-NHEJ
ONG1101340	2	0	1	-1	DSBR	c-NHEJ	c-NHEJ
ONG0200150	0	48	4	-73	MMBIR	RBM	RBM
ONG1201090	0	4915	-49	-32	MMBIR	RBM	RBM
ONG1201100	0	5	1	5	DSBR	c-NHEJ	alt-EJ or template-switch
ONG1201120	6	0	-18	-24	DSBR	Filler	Filler
ONG0201190	0	21	1	-2	MMBIR	RBM	RBM
ONG0201200	3	0	3	4	DSBR	c-NHEJ	c-NHEJ
ONG0301290	0	2	1	-1	DSBR	c-NHEJ	c-NHEJ
ONG0301300	1	0	1	-1	DSBR	c-NHEJ	c-NHEJ
ONG0301340	0	15	1	1	MMBIR	RBM	RBM
ONG0301360	0	4	0	-1	DSBR	c-NHEJ	c-NHEJ
ONG0301370	0	17	-1	1	MMBIR	RBM	RBM
ONG0401220	0	54	3	6	MMBIR	RBM	RBM
ONG0401270	0	3	6	1	DSBR	alt-EJ or template-switch	c-NHEJ
ONG0401290	1	0	-1	-19	DSBR	c-NHEJ	filler
ONG0500780	98	0	2	2	MMBIR	RBM	RBM
ONG0500790	1	0	-3	1	DSBR	c-NHEJ	c-NHEJ
ONG0601120	0	0	0	3	DSBR	c-NHEJ	c-NHEJ
ONG0700900	0	18	0	2	MMBIR	RBM	RBM
ONG0700910	2	0	0	1	DSBR	c-NHEJ	c-NHEJ
ONG0700920	10	0	-23	16	DSBR	filler	alt-EJ or template-switch
ONG0700930	80	0	5	1	MMBIR	RBM	RBM
ONG0700940	5	0	-1	-268	DSBR	c-NHEJ	filler
ONG0800940	10	0	0	2	DSBR	c-NHEJ	c-NHEJ
ONG0801000	0	0	-1	0	DSBR	c-NHEJ	c-NHEJ
ONG0801010	29	0	-38	-64	MMBIR	RBM	RBM
ONG0801020	7	0	-247	-141	DSBR	filler	filler
ONG0800690	0	205	-29	-29	MMBIR	RBM	RBM
ONG0801030	0	2	2	2	DSBR	c-NHEJ	c-NHEJ
ONG0801040	0	10	0	-2	DSBR	c-NHEJ	c-NHEJ
ONG0900540	1	0	-1	0	DSBR	c-NHEJ	c-NHEJ
ONG1000880	0	76	-15	-23	MMBIR	RBM	RBM
ONG0101610	1	0	1	2	DSBR	c-NHEJ	c-NHEJ
ONG0801060	1	0	1	-1	DSBR	c-NHEJ	c-NHEJ
ONG0401310	0	3	1	2	DSBR	c-NHEJ	c-NHEJ
ONG1101500	2	0	4	1	DSBR	c-NHEJ	c-NHEJ
ONG0601140	0	14	-9	-8	MMBIR	RBM	RBM
ONG0601150	0	1	0	0	DSBR	c-NHEJ	c-NHEJ
ONG0101620	1	0	-10	-8	DSBR	filler	filler
ONG0801080	0	11	0	4	MMBIR	RBM	RBM
ONG0401320	2	0	1	2	DSBR	c-NHEJ	c-NHEJ
ONG0500810	0	4	0	0	DSBR	c-NHEJ	c-NHEJ
ONG1101520	3	0	1	4	DSBR	c-NHEJ	c-NHEJ
ONG1201230	3	0	4	-39	DSBR	c-NHEJ	filler
ONG0601270	5	0	6	0	DSBR	alt-EJ or template-switch	c-NHEJ
ONG1201140	0	369	-35	-79	MMBIR	RBM	RBM
ONG0701040	2	0	1	0	DSBR	c-NHEJ	c-NHEJ
ONG0101720	795	0	-2	-44	MMBIR	RBM	RBM
ONG0801090	1	0	0	1	DSBR	c-NHEJ	c-NHEJ
ONG0101730	3	0	1	1	DSBR	c-NHEJ	c-NHEJ
ONG1000920	0	11	1	1	MMBIR	RBM	RBM
ONG1101530	0	0	1	-99	DSBR	c-NHEJ	filler
ONG1101550	0	0	1	-1	DSBR	c-NHEJ	c-NHEJ
ONG1201240	0	3	2	1	DSBR	c-NHEJ	c-NHEJ
ONG0201250	0	23	7	1	MMBIR	RBM	RBM
ONG0201260	3	0	2	0	DSBR	c-NHEJ	c-NHEJ
ONG0201270	0	0	2	3	DSBR	c-NHEJ	c-NHEJ
ONG0301430	0	5	2	-1	DSBR	c-NHEJ	c-NHEJ
ONG0401380	0	51	-88	-24	MMBIR	RBM	RBM
ONG0401390	7	0	0	0	DSBR	c-NHEJ	c-NHEJ
ONG0401400	0	1	0	0	DSBR	c-NHEJ	c-NHEJ
ONG0500930	0	2	2	1	DSBR	c-NHEJ	c-NHEJ
ONG0601300	0	30	3	-36	MMBIR	RBM	RBM
ONG0701050	0	21	0	-30	MMBIR	RBM	RBM
ONG0701060	0	21	0	-32	MMBIR	RBM	RBM
ONG0900910	0	1	2	2	DSBR	c-NHEJ	c-NHEJ
ONG0301440	0	1	1	2	DSBR	c-NHEJ	c-NHEJ
ONG0201210	0	3	-39	-2	DSBR	filler	c-NHEJ
ONG1101380	0	0	-80	-3	DSBR	filler	c-NHEJ
ONG0101740	0	104	2	2	MMBIR	RBM	RBM
ONG0801190	7	0	-137	-29	DSBR	filler	filler
ONG1201250	0	127	-28	-51	MMBIR	RBM	RBM
ONG0900930	0	0	1	-11	DSBR	c-NHEJ	filler
ONG0101650	2	0	1	-2	DSBR	c-NHEJ	c-NHEJ
ONG1201150	1	0	0	-46	DSBR	c-NHEJ	filler
ONG0301390	0	2	0	0	DSBR	c-NHEJ	c-NHEJ
ONG0801100	4	0	-32	1	DSBR	filler	c-NHEJ
ONG0401410	0	9	7	-6	DSBR	alt-EJ or template-switch	filler
ONG0601310	0	4	1	-2	DSBR	c-NHEJ	c-NHEJ
ONG1101400	0	5	1	0	DSBR	c-NHEJ	c-NHEJ
ONG0801110	0	1	2	0	DSBR	c-NHEJ	c-NHEJ
ONG0101760	1	0	1	1	DSBR	c-NHEJ	c-NHEJ
ONG0101770	0	1	-39	1	DSBR	filler	c-NHEJ
ONG1000940	0	14	-3	0	MMBIR	RBM	RBM
ONG1000950	0	13	-1	1	MMBIR	RBM	RBM
ONG1101570	1	0	-1	4	DSBR	c-NHEJ	c-NHEJ
ONG0201280	1	0	-1	-1	DSBR	c-NHEJ	c-NHEJ
ONG0701110	1	0	-1	-1	DSBR	c-NHEJ	c-NHEJ
ONG1000890	0	4	-25	0	DSBR	filler	c-NHEJ
ONG1101580	6	0	6	-1	DSBR	alt-EJ or template-switch	c-NHEJ
ONG0101810	3	0	5	1	DSBR	alt-EJ or template-switch	c-NHEJ
ONG0101820	0	31	0	-4	MMBIR	RBM	RBM
ONG0201300	78	0	-1	-157	MMBIR	RBM	RBM
ONG0601360	1	0	4	2	DSBR	c-NHEJ	c-NHEJ
ONG0900940	0	411	1	2	MMBIR	RBM	RBM
ONG1000960	0	0	0	2	DSBR	c-NHEJ	c-NHEJ
ONG1101600	0	47	2	5	MMBIR	RBM	RBM
ONG1101610	0	21	5	0	MMBIR	RBM	RBM
ONG1201310	3	0	2	4	DSBR	c-NHEJ	c-NHEJ
ONG1201320	0	0	1	6	DSBR	c-NHEJ	alt-EJ or template-switch
ONG0201320	0	1	0	2	DSBR	c-NHEJ	c-NHEJ
ONG0401440	0	2	0	-2	DSBR	c-NHEJ	c-NHEJ
ONG0401450	0	9	5	6	DSBR	alt-EJ or template-switch	alt-EJ or template-switch
ONG0701120	2	0	0	3	DSBR	c-NHEJ	c-NHEJ
ONG0701130	0	629	-14	1	MMBIR	RBM	RBM
ONG0701140	3	0	3	4	DSBR	c-NHEJ	c-NHEJ
ONG0801200	2	0	4	2	DSBR	c-NHEJ	c-NHEJ
ONG0801220	0	13	1	0	MMBIR	RBM	RBM
ONG0900950	0	112	-49	-12	MMBIR	RBM	RBM
ONG0900970	3	0	1	-1	DSBR	c-NHEJ	c-NHEJ
ONG0201330	1	0	0	0	DSBR	c-NHEJ	c-NHEJ
ONG0101830	0	2	1	2	DSBR	c-NHEJ	c-NHEJ
ONG0301400	3	0	3	1	DSBR	c-NHEJ	c-NHEJ
ONG0401460	0	7	2	0	DSBR	c-NHEJ	c-NHEJ
ONG1000970	0	32	-2	-68	MMBIR	RBM	RBM
ONG0701150	0	8	1	0	DSBR	c-NHEJ	c-NHEJ
ONG0701160	8	0	5	-39	DSBR	alt-EJ or template-switch	filler
ONG0301450	0	5	-1	0	DSBR	c-NHEJ	c-NHEJ
ONG0101840	0	1	2	2	DSBR	c-NHEJ	c-NHEJ
ONG1000980	0	13	3	-22	MMBIR	RBM	RBM
ONG1101640	0	1055	3	9	MMBIR	RBM	RBM
ONG0201340	3	0	-46	0	DSBR	filler	c-NHEJ
ONG0201350	0	698	2	1	MMBIR	RBM	RBM
ONG0201360	3	0	-50	-34	DSBR	filler	filler
ONG0401470	1	0	1	0	DSBR	c-NHEJ	c-NHEJ
ONG0500940	1	0	1	0	DSBR	c-NHEJ	c-NHEJ
ONG0801230	0	0	1	0	DSBR	c-NHEJ	c-NHEJ
ONG0900980	6	0	-2	2	DSBR	c-NHEJ	c-NHEJ
ONG0900990	0	2	-2	0	DSBR	c-NHEJ	c-NHEJ
ONG0101860	2	0	2	0	DSBR	c-NHEJ	c-NHEJ
ONG0101680	2	0	2	2	DSBR	c-NHEJ	c-NHEJ
ONG0101690	52	0	-5	-62	MMBIR	RBM	RBM
ONG1000990	0	92	3	1	MMBIR	RBM	RBM
ONG1000900	5	0	1	6	DSBR	c-NHEJ	alt-EJ or template-switch
ONG1101720	2	0	0	1	DSBR	c-NHEJ	c-NHEJ
ONG1101410	0	1	0	-44	DSBR	c-NHEJ	filler
ONG1201180	0	2	1	1	DSBR	c-NHEJ	c-NHEJ
ONG0301410	0	10	0	1	DSBR	c-NHEJ	c-NHEJ
ONG0201430	3	0	0	-1	DSBR	c-NHEJ	c-NHEJ
ONG0201450	5	0	-29	4	DSBR	filler	c-NHEJ
ONG0201460	3	0	0	3	DSBR	c-NHEJ	c-NHEJ
ONG0201470	0	13	-2	2	MMBIR	RBM	RBM
ONG0200440	2	0	-1	2	DSBR	c-NHEJ	c-NHEJ
ONG0301460	0	7	-74	2	DSBR	filler	c-NHEJ
ONG0301470	0	1	-1	-1	DSBR	c-NHEJ	c-NHEJ
ONG0401520	0	6	0	0	DSBR	c-NHEJ	c-NHEJ
ONG0401340	2	0	1	0	DSBR	c-NHEJ	c-NHEJ
ONG0401570	0	20	-16	-3	MMBIR	RBM	RBM
ONG0500830	0	23	3	9	MMBIR	RBM	RBM
ONG0500840	0	4	-181	-163	DSBR	filler	filler
ONG0500860	0	61	1	-16	MMBIR	RBM	RBM
ONG0500990	4	0	2	1	DSBR	c-NHEJ	c-NHEJ
ONG0500890	0	2	1	4	DSBR	c-NHEJ	c-NHEJ
ONG0501000	2	0	2	0	DSBR	c-NHEJ	c-NHEJ
ONG0601410	0	0	0	0	DSBR	c-NHEJ	c-NHEJ
ONG0601160	1	0	1	0	DSBR	c-NHEJ	c-NHEJ
ONG0601440	4	0	-33	1	DSBR	filler	c-NHEJ
ONG0601170	2	0	2	-131	DSBR	c-NHEJ	filler
ONG0701180	0	0	0	2	DSBR	c-NHEJ	c-NHEJ
ONG0701190	0	1	0	0	DSBR	c-NHEJ	c-NHEJ
ONG0200480	9	0	2	13	DSBR	c-NHEJ	alt-EJ or template-switch
ONG0701200	0	1	0	7	DSBR	c-NHEJ	alt-EJ or template-switch
ONG0701210	6	0	3	9	DSBR	c-NHEJ	alt-EJ or template-switch
ONG0701220	0	10	0	2	DSBR	c-NHEJ	c-NHEJ
ONG0700960	0	13	4	-2	MMBIR	RBM	RBM
ONG0700980	1	0	-1	1	DSBR	c-NHEJ	c-NHEJ
ONG0801280	4	0	0	1	DSBR	c-NHEJ	c-NHEJ
ONG0901020	0	0	-2	1	DSBR	c-NHEJ	c-NHEJ
ONG0901030	34	0	-2	1	MMBIR	RBM	RBM
ONG0900840	0	10	0	-3	DSBR	c-NHEJ	c-NHEJ
ONG0900850	2	0	4	0	DSBR	c-NHEJ	c-NHEJ
ONG0900860	0	0	4	2	DSBR	c-NHEJ	c-NHEJ
ONG1101090	0	743	6	4	MMBIR	RBM	RBM
ONG1201350	0	10	-1	0	DSBR	c-NHEJ	c-NHEJ
ONG1101740	0	3	-4	0	DSBR	c-NHEJ	c-NHEJ
ONG0601460	8	0	1	8	DSBR	c-NHEJ	alt-EJ or template-switch
ONG0801290	4	0	3	2	DSBR	c-NHEJ	c-NHEJ
ONG1101620	0	1	1	4	DSBR	c-NHEJ	c-NHEJ
ONG0301480	3	0	8	3	DSBR	alt-EJ or template-switch	c-NHEJ
ONG0401580	3	0	5	0	DSBR	alt-EJ or template-switch	c-NHEJ
ONG0401590	0	5	-1	1	DSBR	c-NHEJ	c-NHEJ
ONG0601470	3	0	2	3	DSBR	c-NHEJ	c-NHEJ
ONG0101870	2	0	3	2	DSBR	c-NHEJ	c-NHEJ
ONG1001030	9	0	3	-1	DSBR	c-NHEJ	c-NHEJ
ONG1101780	0	8	-16	1	DSBR	filler	c-NHEJ
ONG0201490	3	0	-102	4	DSBR	filler	c-NHEJ
ONG0201500	3	0	0	-40	DSBR	c-NHEJ	filler
ONG0301490	0	42	2	-3	MMBIR	RBM	RBM
ONG0701250	0	1	1	2	DSBR	c-NHEJ	c-NHEJ
ONG0200540	0	10	3	0	DSBR	c-NHEJ	c-NHEJ
ONG0201510	109	0	0	2	MMBIR	RBM	RBM
ONG0201380	1	0	2	0	DSBR	c-NHEJ	c-NHEJ
ONG0201390	0	0	0	0	DSBR	c-NHEJ	c-NHEJ
ONG1101810	1	0	2	2	DSBR	c-NHEJ	c-NHEJ
ONG1101430	0	0	1	0	DSBR	c-NHEJ	c-NHEJ
ONG1101440	0	22	3	1	MMBIR	RBM	RBM
ONG0401370	0	3	3	1	DSBR	c-NHEJ	c-NHEJ
ONG0101880	0	3	-2	1	DSBR	c-NHEJ	c-NHEJ
ONG1001050	0	4	0	1	DSBR	c-NHEJ	c-NHEJ
ONG1101820	0	4	2	-2	DSBR	c-NHEJ	c-NHEJ
ONG0201520	0	1	1	-174	DSBR	c-NHEJ	filler
ONG0301500	0	0	1	-39	DSBR	c-NHEJ	filler
ONG0301510	0	1	1	0	DSBR	c-NHEJ	c-NHEJ
ONG0401630	0	21	-12	-46	MMBIR	RBM	RBM
ONG0401640	0	772	4	3	MMBIR	RBM	RBM
ONG0401650	0	772	4	3	MMBIR	RBM	RBM
ONG0601500	3	0	2	2	DSBR	c-NHEJ	c-NHEJ
ONG0901060	0	0	-56	2	DSBR	filler	c-NHEJ
ONG1201370	0	16	-16	6	MMBIR	RBM	RBM
ONG0201530	10	0	1	0	DSBR	c-NHEJ	c-NHEJ
ONG0201550	3	0	6	-34	DSBR	alt-EJ or template-switch	filler
ONG0601390	25	0	2	-14	MMBIR	RBM	RBM
ONG1101650	26	0	2	-40	MMBIR	RBM	RBM
ONG0101850	4	0	3	0	DSBR	c-NHEJ	c-NHEJ
ONG1101670	0	361	-229	-3	MMBIR	RBM	RBM
ONG0201400	1	0	0	3	DSBR	c-NHEJ	c-NHEJ
ONG0200600	0	28	5	-2	MMBIR	RBM	RBM
ONG0201420	2	0	3	2	DSBR	c-NHEJ	c-NHEJ
ONG0401490	1	0	2	0	DSBR	c-NHEJ	c-NHEJ
ONG0500950	0	34	-1	-443	MMBIR	RBM	RBM
ONG0601420	0	6	9	4	DSBR	alt-EJ or template-switch	c-NHEJ
ONG0801240	0	13	8	-14	MMBIR	RBM	RBM
ONG0801250	0	6	2	-9	DSBR	c-NHEJ	filler
ONG0801260	3	0	-121	-478	DSBR	filler	filler
ONG0200610	0	9	7	-21	DSBR	alt-EJ or template-switch	filler
ONG0901000	1	0	2	0	DSBR	c-NHEJ	c-NHEJ
ONG0200620	18	0	-69	-5	DSBR	filler	c-NHEJ
ONG0901010	1	0	-1	2	DSBR	c-NHEJ	c-NHEJ
ONG0200900	3	0	8	-1	DSBR	alt-EJ or template-switch	c-NHEJ
ONGUN00070	0	2	1	-1	DSBR	c-NHEJ	c-NHEJ
ONG0401500	0	7	0	0	DSBR	c-NHEJ	c-NHEJ
ONG0500900	1	0	1	2	DSBR	c-NHEJ	c-NHEJ
ONG0500910	0	2	2	3	DSBR	c-NHEJ	c-NHEJ
ONG0601190	2	0	0	5	DSBR	c-NHEJ	alt-EJ or template-switch
ONG0601200	0	2	2	-71	DSBR	c-NHEJ	filler
ONG0601210	0	0	3	1	DSBR	c-NHEJ	c-NHEJ
ONG0601220	1	0	2	0	DSBR	c-NHEJ	c-NHEJ
ONG0700990	0	13	1	1	MMBIR	RBM	RBM
ONG0801130	0	0	1	-25	DSBR	c-NHEJ	filler
ONG0801140	18	0	-34	-154	DSBR	filler	filler
ONG0801150	0	41	0	5	MMBIR	RBM	RBM
ONG0900880	0	146	-23	-4	MMBIR	RBM	RBM
ONG1101450	1	0	1	1	DSBR	c-NHEJ	c-NHEJ
ONG1101470	10	0	1	10	DSBR	c-NHEJ	alt-EJ or template-switch
ONG1101480	1	0	5	1	DSBR	alt-EJ or template-switch	c-NHEJ
ONG1201190	3	0	-1	-1	DSBR	c-NHEJ	c-NHEJ
ONG1201200	27	0	-15	-5	MMBIR	RBM	RBM
ONG0101910	0	0	0	1	DSBR	c-NHEJ	c-NHEJ
ONG0101920	0	3	1	2	DSBR	c-NHEJ	c-NHEJ
ONG0101930	0	1	1	0	DSBR	c-NHEJ	c-NHEJ
ONG0101950	0	22	0	0	MMBIR	RBM	RBM
ONG0101960	0	14	2	2	MMBIR	RBM	RBM
ONG0101990	71	0	1	0	MMBIR	RBM	RBM
ONG0102000	0	3	-1	1	DSBR	c-NHEJ	c-NHEJ
ONG0102010	0	2	1	4	DSBR	c-NHEJ	c-NHEJ
ONG0102050	21	0	-1	-32	MMBIR	RBM	RBM
ONG0102060	22	0	1	6	MMBIR	RBM	RBM
ONG0102090	0	0	-1	2	DSBR	c-NHEJ	c-NHEJ
ONG0102140	11	0	3	8	DSBR	c-NHEJ	alt-EJ or template-switch
ONG0102160	3	0	1	-36	DSBR	c-NHEJ	filler
ONG0102170	0	11	1	2	MMBIR	RBM	RBM
ONG0102180	0	3	0	0	DSBR	c-NHEJ	c-NHEJ
ONG0102190	0	9	-16	3	DSBR	filler	c-NHEJ
ONG0102200	9	0	5	10	DSBR	alt-EJ or template-switch	alt-EJ or template-switch
ONG0102210	0	3	-1	0	DSBR	c-NHEJ	c-NHEJ
ONG0102220	0	3	-103	-153	DSBR	filler	filler
ONG0102230	0	0	0	1	DSBR	c-NHEJ	c-NHEJ
ONG0102240	0	32	-21	2	MMBIR	RBM	RBM
ONG0102260	5	0	9	0	DSBR	alt-EJ or template-switch	c-NHEJ
ONG0102270	0	0	0	-562	DSBR	c-NHEJ	filler
ONG0102280	14	0	4	-34	DSBR	c-NHEJ	filler
ONG0102290	0	12	-40	0	MMBIR	RBM	RBM
ONG0102300	7	0	-1	7	DSBR	c-NHEJ	alt-EJ or template-switch
ONG0102310	7	0	4	1	DSBR	c-NHEJ	c-NHEJ
ONG0102320	0	7	1	-36	DSBR	c-NHEJ	filler
ONG0102330	0	1	-2	1	DSBR	c-NHEJ	c-NHEJ
ONG0201560	2	0	-1	2	DSBR	c-NHEJ	c-NHEJ
ONG0201570	5	0	1	7	DSBR	c-NHEJ	alt-EJ or template-switch
ONG0201580	0	0	1	0	DSBR	c-NHEJ	c-NHEJ
ONG0201590	0	10	-1	-54	DSBR	c-NHEJ	filler
ONG0201610	0	780	1	0	MMBIR	RBM	RBM
ONG0201620	0	9	1	-10	DSBR	c-NHEJ	filler
ONG0201630	11	0	2	1	DSBR	c-NHEJ	c-NHEJ
ONG0201690	1	0	3	1	DSBR	c-NHEJ	c-NHEJ
ONG0201720	2	0	-37	3	DSBR	filler	c-NHEJ
ONG0201730	0	3	0	-45	DSBR	c-NHEJ	filler
ONG0201750	1	0	1	0	DSBR	c-NHEJ	c-NHEJ
ONG0201760	0	5	4	1	DSBR	c-NHEJ	c-NHEJ
ONG0201780	32	0	0	-21	MMBIR	RBM	RBM
ONG0201790	1	0	2	1	DSBR	c-NHEJ	c-NHEJ
ONG0201810	0	27	6	-1	MMBIR	RBM	RBM
ONG0201830	0	0	0	0	DSBR	c-NHEJ	c-NHEJ
ONG0201840	56	0	3	0	MMBIR	RBM	RBM
ONG0201850	0	14	0	0	MMBIR	RBM	RBM
ONG0201860	0	3	0	3	DSBR	c-NHEJ	c-NHEJ
ONG0201870	0	1	5	2	DSBR	alt-EJ or template-switch	c-NHEJ
ONG0201890	6	0	-2	10	DSBR	c-NHEJ	alt-EJ or template-switch
ONG0201900	0	2	1	-1	DSBR	c-NHEJ	c-NHEJ
ONG0201910	2	0	1	1	DSBR	c-NHEJ	c-NHEJ
ONG0201930	2	0	-37	1	DSBR	filler	c-NHEJ
ONG0201940	1	0	-1	2	DSBR	c-NHEJ	c-NHEJ
ONG0201950	1	0	-2	0	DSBR	c-NHEJ	c-NHEJ
ONG0201970	0	3	-1	-45	DSBR	c-NHEJ	filler
ONG0201980	0	1	-1	0	DSBR	c-NHEJ	c-NHEJ
ONG0301550	5	0	10	2	DSBR	alt-EJ or template-switch	c-NHEJ
ONG0301570	0	21	-34	0	MMBIR	RBM	RBM
ONG0301590	0	9	-1	0	DSBR	c-NHEJ	c-NHEJ
ONG0301600	0	2	-18	5	DSBR	filler	alt-EJ or template-switch
ONG0301620	2	0	0	2	DSBR	c-NHEJ	c-NHEJ
ONG0301650	113	0	-3	-430	MMBIR	RBM	RBM
ONG0301660	0	64	0	0	MMBIR	RBM	RBM
ONG0301680	0	16	0	-2	MMBIR	RBM	RBM
ONG0301690	0	868	0	-1	MMBIR	RBM	RBM
ONG0301700	0	13	1	7	MMBIR	RBM	RBM
ONG0301720	0	3	0	-1	DSBR	c-NHEJ	c-NHEJ
ONG0301730	4	0	1	1	DSBR	c-NHEJ	c-NHEJ
ONG0301740	0	16	-3	5	MMBIR	RBM	RBM
ONG0301750	2	0	-1	0	DSBR	c-NHEJ	c-NHEJ
ONG0200800	9	0	-392	-11	DSBR	filler	filler
ONG0301760	2	0	3	1	DSBR	c-NHEJ	c-NHEJ
ONG0301800	0	12	-1	0	MMBIR	RBM	RBM
ONG0301820	0	27	-45	-11	MMBIR	RBM	RBM
ONG0301830	0	15	2	1	MMBIR	RBM	RBM
ONG0301840	0	2	-33	0	DSBR	filler	c-NHEJ
ONG0401680	3	0	0	-2	DSBR	c-NHEJ	c-NHEJ
ONG0401710	4	0	1	0	DSBR	c-NHEJ	c-NHEJ
ONG0401730	0	717	-707	-16	MMBIR	RBM	RBM
ONG0401760	0	2	5	3	DSBR	alt-EJ or template-switch	c-NHEJ
ONG0401790	0	0	-1	2	DSBR	c-NHEJ	c-NHEJ
ONG0401820	0	11	1	0	MMBIR	RBM	RBM
ONG0401840	9	0	-6	0	DSBR	filler	c-NHEJ
ONG0401850	0	17	1	-44	MMBIR	RBM	RBM
ONG0401900	1	0	0	0	DSBR	c-NHEJ	c-NHEJ
ONG0401910	5	0	-25	-6	DSBR	filler	filler
ONG0401960	2	0	10	2	DSBR	alt-EJ or template-switch	c-NHEJ
ONG0401970	0	14	0	1	MMBIR	RBM	RBM
ONG0401980	3	0	-1	0	DSBR	c-NHEJ	c-NHEJ
ONG0401990	1	0	1	-1	DSBR	c-NHEJ	c-NHEJ
ONG0200850	2	0	3	-1	DSBR	c-NHEJ	c-NHEJ
ONG0402010	1	0	0	1	DSBR	c-NHEJ	c-NHEJ
ONG0402020	3	0	0	1	DSBR	c-NHEJ	c-NHEJ
ONG0402030	0	1	0	53	DSBR	c-NHEJ	alt-EJ or template-switch
ONG0402050	0	11	1	1	MMBIR	RBM	RBM
ONG0402070	0	5	-3	-12	DSBR	c-NHEJ	filler
ONG0501040	6	0	5	0	DSBR	alt-EJ or template-switch	c-NHEJ
ONG0200860	0	0	-7	0	DSBR	filler	c-NHEJ
ONG0501060	320	0	0	-6	MMBIR	RBM	RBM
ONG0501160	2	0	1	-2	DSBR	c-NHEJ	c-NHEJ
ONG0501170	1	0	1	-43	DSBR	c-NHEJ	filler
ONG0501190	2	0	0	3	DSBR	c-NHEJ	c-NHEJ
ONG0501200	0	4	1	0	DSBR	c-NHEJ	c-NHEJ
ONG0501210	1	0	1	-1	DSBR	c-NHEJ	c-NHEJ
ONG0501230	0	36	0	1	MMBIR	RBM	RBM
ONG0501240	0	4	-2	0	DSBR	c-NHEJ	c-NHEJ
ONG0501250	0	2	-2	4	DSBR	c-NHEJ	c-NHEJ
ONG0601550	0	288	0	0	MMBIR	RBM	RBM
ONG0601570	6	0	-3	1	DSBR	c-NHEJ	c-NHEJ
ONG0601610	0	17	2	-1	MMBIR	RBM	RBM
ONG0601630	5	0	4	1	DSBR	c-NHEJ	c-NHEJ
ONG0601640	0	2	0	1	DSBR	c-NHEJ	c-NHEJ
ONG0601650	1	0	0	0	DSBR	c-NHEJ	c-NHEJ
ONG0601660	0	6	0	0	DSBR	c-NHEJ	c-NHEJ
ONG0601720	0	0	-4	1	DSBR	c-NHEJ	c-NHEJ
ONG0601730	12	0	1	0	DSBR	c-NHEJ	c-NHEJ
ONG0601740	0	0	-1	0	DSBR	c-NHEJ	c-NHEJ
ONG0601750	2	0	0	0	DSBR	c-NHEJ	c-NHEJ
ONG0601760	2	0	2	2	DSBR	c-NHEJ	c-NHEJ
ONG0601770	1	0	-49	0	DSBR	filler	c-NHEJ
ONG0601790	0	3	2	3	DSBR	c-NHEJ	c-NHEJ
ONG0601800	0	0	1	-1	DSBR	c-NHEJ	c-NHEJ
ONG0601810	1	0	1	-2	DSBR	c-NHEJ	c-NHEJ
ONG0601820	0	0	-53	0	DSBR	filler	c-NHEJ
ONG0601830	3	0	1	0	DSBR	c-NHEJ	c-NHEJ
ONG0601840	0	8	-3	1	DSBR	c-NHEJ	c-NHEJ
ONG0601860	10	0	4	1	DSBR	c-NHEJ	c-NHEJ
ONG0701280	4	0	0	0	DSBR	c-NHEJ	c-NHEJ
ONG0701290	0	704	2	-34	MMBIR	RBM	RBM
ONG0701300	171	0	9	-4	MMBIR	RBM	RBM
ONG0300030	1	0	1	0	DSBR	c-NHEJ	c-NHEJ
ONG0701320	8	0	-74	-79	DSBR	filler	filler
ONG0701330	0	9	3	-36	DSBR	c-NHEJ	filler
ONG0701360	5	0	0	0	DSBR	c-NHEJ	c-NHEJ
ONG0701370	0	3	3	1	DSBR	c-NHEJ	c-NHEJ
ONG0701390	0	18	0	1	MMBIR	RBM	RBM
ONG0701420	0	17	2	5	MMBIR	RBM	RBM
ONG0701440	1	0	-91	0	DSBR	filler	c-NHEJ
ONG0701450	0	0	0	0	DSBR	c-NHEJ	c-NHEJ
ONG0701460	0	0	1	-20	DSBR	c-NHEJ	filler
ONG0701470	0	121	11	1	MMBIR	RBM	RBM
ONG0300050	32	0	-25	-58	MMBIR	RBM	RBM
ONG0701490	0	4	3	11	DSBR	c-NHEJ	alt-EJ or template-switch
ONG0701500	0	0	1	0	DSBR	c-NHEJ	c-NHEJ
ONG0701510	3	0	4	0	DSBR	c-NHEJ	c-NHEJ
ONG0701530	0	2	0	1	DSBR	c-NHEJ	c-NHEJ
ONG0701560	0	9	0	1	DSBR	c-NHEJ	c-NHEJ
ONG0701570	0	3	2	0	DSBR	c-NHEJ	c-NHEJ
ONG0701580	7	0	12	0	DSBR	alt-EJ or template-switch	c-NHEJ
ONG0701600	0	0	0	0	DSBR	c-NHEJ	c-NHEJ
ONG0701610	0	35	6	-3	MMBIR	RBM	RBM
ONG0701620	0	0	-2	-1	DSBR	c-NHEJ	c-NHEJ
ONG0701640	0	1	1	0	DSBR	c-NHEJ	c-NHEJ
ONG0701660	1	0	1	0	DSBR	c-NHEJ	c-NHEJ
ONG0701680	0	85	-47	3	MMBIR	RBM	RBM
ONG0801300	0	1	4	-6	DSBR	c-NHEJ	filler
ONG0801310	0	2	0	1	DSBR	c-NHEJ	c-NHEJ
ONG0801360	2	0	0	1	DSBR	c-NHEJ	c-NHEJ
ONG0801380	0	2	7	3	DSBR	alt-EJ or template-switch	c-NHEJ
ONG0801400	4	0	-1	2	DSBR	c-NHEJ	c-NHEJ
ONG0801410	0	7	3	1	DSBR	c-NHEJ	c-NHEJ
ONG0801420	2	0	1	0	DSBR	c-NHEJ	c-NHEJ
ONG0801440	0	5	-3	0	DSBR	c-NHEJ	c-NHEJ
ONG0801450	0	12	0	2	MMBIR	RBM	RBM
ONG0801480	0	3	1	4	DSBR	c-NHEJ	c-NHEJ
ONG0801490	4	0	2	3	DSBR	c-NHEJ	c-NHEJ
ONG0801500	2	0	1	0	DSBR	c-NHEJ	c-NHEJ
ONG0801510	3	0	0	3	DSBR	c-NHEJ	c-NHEJ
ONG0801520	2	0	1	2	DSBR	c-NHEJ	c-NHEJ
ONG0801540	7	0	2	7	DSBR	c-NHEJ	alt-EJ or template-switch
ONG0100220	0	0	1	10	DSBR	c-NHEJ	alt-EJ or template-switch
ONG0901080	0	6	0	-28	DSBR	c-NHEJ	filler
ONG0901090	0	8	-38	-2	DSBR	filler	c-NHEJ
ONG0901130	0	3	-1	1	DSBR	c-NHEJ	c-NHEJ
ONG0901140	0	2	2	4	DSBR	c-NHEJ	c-NHEJ
ONG0901170	1	0	-1	0	DSBR	c-NHEJ	c-NHEJ
ONG0901180	0	16	-2	0	MMBIR	RBM	RBM
ONG0901190	4	0	0	2	DSBR	c-NHEJ	c-NHEJ
ONG0901210	0	0	1	1	DSBR	c-NHEJ	c-NHEJ
ONG0901220	0	1249	-10	-201	MMBIR	RBM	RBM
ONG0901230	10	0	3	2	DSBR	c-NHEJ	c-NHEJ
ONG0901240	0	8	0	0	DSBR	c-NHEJ	c-NHEJ
ONG0901250	12	0	12	0	DSBR	alt-EJ or template-switch	c-NHEJ
ONG0901260	4	0	4	4	DSBR	c-NHEJ	c-NHEJ
ONG0901280	0	12	4	1	MMBIR	RBM	RBM
ONG0901290	0	76	3	-53	MMBIR	RBM	RBM
ONG0901310	0	20	-36	-9	MMBIR	RBM	RBM
ONG1001080	0	4	0	1	DSBR	c-NHEJ	c-NHEJ
ONG1001110	2	0	2	1	DSBR	c-NHEJ	c-NHEJ
ONG1001140	4	0	2	-16	DSBR	c-NHEJ	filler
ONG1001150	0	141	-325	0	MMBIR	RBM	RBM
ONG1001190	0	62	0	2	MMBIR	RBM	RBM
ONG1001200	0	1	2	-34	DSBR	c-NHEJ	filler
ONG0300140	0	13	-21	1	MMBIR	RBM	RBM
ONG1001220	0	15	1	0	MMBIR	RBM	RBM
ONG1001260	1	0	0	0	DSBR	c-NHEJ	c-NHEJ
ONG1001280	6	0	8	1	DSBR	alt-EJ or template-switch	c-NHEJ
ONG1001360	3	0	0	4	DSBR	c-NHEJ	c-NHEJ
ONG1001370	0	0	0	0	DSBR	c-NHEJ	c-NHEJ
ONG0300160	5	0	4	6	DSBR	c-NHEJ	alt-EJ or template-switch
ONG1001390	13	0	-1	2	DSBR	c-NHEJ	c-NHEJ
ONG1001400	38	0	2	0	MMBIR	RBM	RBM
ONG1001410	38	0	11	1	MMBIR	RBM	RBM
ONG1101840	0	17	1	5	MMBIR	RBM	RBM
ONG1101850	0	5	3	2	DSBR	c-NHEJ	c-NHEJ
ONG1101890	0	1	2	-66	DSBR	c-NHEJ	filler
ONG1101930	9	0	-1	1	DSBR	c-NHEJ	c-NHEJ
ONG1101950	0	33	3	14	MMBIR	RBM	RBM
ONG1101960	0	8	1	0	DSBR	c-NHEJ	c-NHEJ
ONG1101990	2	0	-49	2	DSBR	filler	c-NHEJ
ONG1102000	1	0	3	3	DSBR	c-NHEJ	c-NHEJ
ONG1102030	0	47	3	1	MMBIR	RBM	RBM
ONG1102040	0	0	0	2	DSBR	c-NHEJ	c-NHEJ
ONG1102050	6	0	1	9	DSBR	c-NHEJ	alt-EJ or template-switch
ONG0300190	0	8	0	3	DSBR	c-NHEJ	c-NHEJ
ONG1102070	0	6	0	1	DSBR	c-NHEJ	c-NHEJ
ONG1102090	0	36	1	-27	MMBIR	RBM	RBM
ONG1102110	0	65	-37	-1	MMBIR	RBM	RBM
ONG1102120	2	0	-27	-31	DSBR	filler	filler
ONG1102210	19	0	-30	-30	DSBR	filler	filler
ONG1102220	0	3	-1	-1	DSBR	c-NHEJ	c-NHEJ
ONG1201420	0	15	2	0	MMBIR	RBM	RBM
ONG1201430	0	2	1	2	DSBR	c-NHEJ	c-NHEJ
ONG1201450	3	0	0	-3	DSBR	c-NHEJ	c-NHEJ
ONG1201460	0	3	6	0	DSBR	alt-EJ or template-switch	c-NHEJ
ONG1201490	3	0	3	3	DSBR	c-NHEJ	c-NHEJ
ONG1201550	2	0	2	0	DSBR	c-NHEJ	c-NHEJ
ONG1201570	0	0	0	2	DSBR	c-NHEJ	c-NHEJ
ONG1201580	0	5	2	5	DSBR	c-NHEJ	alt-EJ or template-switch
ONG1201600	0	427	-123	-1	MMBIR	RBM	RBM
ONG1201650	0	1	1	0	DSBR	c-NHEJ	c-NHEJ
ONG1201680	0	99	10	6	MMBIR	RBM	RBM
ONG1201710	4	0	0	5	DSBR	c-NHEJ	alt-EJ or template-switch
ONG1201720	0	5	0	0	DSBR	c-NHEJ	c-NHEJ
ONG1201740	0	1	-1	1	DSBR	c-NHEJ	c-NHEJ
ONG1201750	0	35	-21	-48	MMBIR	RBM	RBM
ONG0102340	0	1	0	-63	DSBR	c-NHEJ	filler
ONG0102350	0	92	4	-10	MMBIR	RBM	RBM
ONG0102380	0	18	-11	5	MMBIR	RBM	RBM
ONG0102400	0	5	0	4	DSBR	c-NHEJ	c-NHEJ
ONG0102410	0	9	-3	-26	DSBR	c-NHEJ	filler
ONG0102420	0	9	1	1	DSBR	c-NHEJ	c-NHEJ
ONG0202040	0	0	1	-41	DSBR	c-NHEJ	filler
ONG0202050	0	1	-13	3	DSBR	filler	c-NHEJ
ONG0202060	13	0	-1	13	DSBR	c-NHEJ	alt-EJ or template-switch
ONG0202070	0	19	-55	-20	MMBIR	RBM	RBM
ONG0202080	0	12	1	-9	MMBIR	RBM	RBM
ONG0202120	0	3	-100	-2	DSBR	filler	c-NHEJ
ONG0202130	0	143	0	-49	MMBIR	RBM	RBM
ONG0202140	3	0	2	2	DSBR	c-NHEJ	c-NHEJ
ONG0301850	0	4	0	-9	DSBR	c-NHEJ	filler
ONG0301860	0	6	2	1	DSBR	c-NHEJ	c-NHEJ
ONG0301870	0	1	5	3	DSBR	alt-EJ or template-switch	c-NHEJ
ONG0301880	0	0	-1	3	DSBR	c-NHEJ	c-NHEJ
ONG0402100	3	0	2	3	DSBR	c-NHEJ	c-NHEJ
ONG0402120	0	26	1	1	MMBIR	RBM	RBM
ONG0402130	0	0	0	0	DSBR	c-NHEJ	c-NHEJ
ONG0402150	0	3	1	0	DSBR	c-NHEJ	c-NHEJ
ONG0501290	0	1	1	0	DSBR	c-NHEJ	c-NHEJ
ONG0501320	3	0	2	0	DSBR	c-NHEJ	c-NHEJ
ONG0501330	0	1	-1	2	DSBR	c-NHEJ	c-NHEJ
ONG0501340	1	0	2	0	DSBR	c-NHEJ	c-NHEJ
ONG0601870	0	1	-1	1	DSBR	c-NHEJ	c-NHEJ
ONG0601880	0	0	2	3	DSBR	c-NHEJ	c-NHEJ
ONG0601900	0	615	0	-1	MMBIR	RBM	RBM
ONG0601910	0	1	3	4	DSBR	c-NHEJ	c-NHEJ
ONG0601920	2	0	4	1	DSBR	c-NHEJ	c-NHEJ
ONG0300300	7	0	2	6	DSBR	c-NHEJ	alt-EJ or template-switch
ONG0601930	1	0	-4	1	DSBR	c-NHEJ	c-NHEJ
ONG0601940	3	0	0	7	DSBR	c-NHEJ	alt-EJ or template-switch
ONG0601950	0	1	0	1	DSBR	c-NHEJ	c-NHEJ
ONG0601960	1	0	-36	-69	DSBR	filler	filler
ONG0701700	1	0	0	1	DSBR	c-NHEJ	c-NHEJ
ONG0701710	2	0	1	4	DSBR	c-NHEJ	c-NHEJ
ONG0701730	0	3	5	2	DSBR	alt-EJ or template-switch	c-NHEJ
ONG0701740	0	6	1	1	DSBR	c-NHEJ	c-NHEJ
ONG0701770	3	0	-2	1	DSBR	c-NHEJ	c-NHEJ
ONG0701790	0	1	0	-1	DSBR	c-NHEJ	c-NHEJ
ONG0701800	19	0	-1	1	DSBR	c-NHEJ	c-NHEJ
ONG0701810	5	0	3	-40	DSBR	c-NHEJ	filler
ONG0701820	0	14	1	-143	MMBIR	RBM	RBM
ONG0801560	50	0	-6	6	MMBIR	RBM	RBM
ONG0801570	1	0	-39	1	DSBR	filler	c-NHEJ
ONG0901330	5	0	6	0	DSBR	alt-EJ or template-switch	c-NHEJ
ONG0901340	0	60	3	1	MMBIR	RBM	RBM
ONG0901360	0	11	-16	4	MMBIR	RBM	RBM
ONG0901370	4	0	0	4	DSBR	c-NHEJ	c-NHEJ
ONG0901410	0	1056	-520	-2	MMBIR	RBM	RBM
ONG1001460	0	0	-1	0	DSBR	c-NHEJ	c-NHEJ
ONG1001470	0	0	0	1	DSBR	c-NHEJ	c-NHEJ
ONG1001480	5	0	3	-42	DSBR	c-NHEJ	filler
ONG1001490	12	0	10	-38	DSBR	alt-EJ or template-switch	filler
ONG1001500	22	0	17	9	MMBIR	RBM	RBM
ONG1102230	0	4	0	0	DSBR	c-NHEJ	c-NHEJ
ONG1102250	1	0	2	0	DSBR	c-NHEJ	c-NHEJ
ONG1102260	0	106	2	2	MMBIR	RBM	RBM
ONG1102270	2	0	1	4	DSBR	c-NHEJ	c-NHEJ
ONG1102280	0	6	-6	-1	DSBR	filler	c-NHEJ
ONG1102290	0	11	-2	-24	MMBIR	RBM	RBM
ONG1102320	3	0	3	1	DSBR	c-NHEJ	c-NHEJ
ONG1102330	0	0	-1	0	DSBR	c-NHEJ	c-NHEJ
ONG1102340	0	2	1	1	DSBR	c-NHEJ	c-NHEJ
ONG1201770	0	1	-1	0	DSBR	c-NHEJ	c-NHEJ
ONG1201780	0	12	4	2	MMBIR	RBM	RBM
ONG1201810	0	1	0	0	DSBR	c-NHEJ	c-NHEJ
ONG1201820	0	46	2	-33	MMBIR	RBM	RBM
ONG0300510	0	4	1	1	DSBR	c-NHEJ	c-NHEJ
ONG0300530	10	0	2	-310	DSBR	c-NHEJ	filler
ONG0300560	0	20	1	6	MMBIR	RBM	RBM
ONG0300580	0	10	-10	-3	DSBR	filler	c-NHEJ
ONG0300590	0	1	-3	-67	DSBR	c-NHEJ	filler
ONG0300710	1	0	1	-453	DSBR	c-NHEJ	filler
ONG0300770	0	9	0	7	DSBR	c-NHEJ	alt-EJ or template-switch
ONG0300820	0	7	2	-19	DSBR	c-NHEJ	filler
ONG0300850	1	0	2	4	DSBR	c-NHEJ	c-NHEJ
ONG0300870	2	0	-1	-1	DSBR	c-NHEJ	c-NHEJ
ONG0300900	0	0	6	0	DSBR	alt-EJ or template-switch	c-NHEJ
ONG0300920	0	67	-1	-46	MMBIR	RBM	RBM
ONG0300940	0	97	1	-118	MMBIR	RBM	RBM
ONG0400010	8	0	-35	-72	DSBR	filler	filler
ONG0100330	0	393	-147	-67	MMBIR	RBM	RBM
ONG0400270	1	0	-2	0	DSBR	c-NHEJ	c-NHEJ
ONG0400300	0	8	2	-3	DSBR	c-NHEJ	c-NHEJ
ONG0400530	1	0	3	0	DSBR	c-NHEJ	c-NHEJ
ONG0400540	0	20	-3	0	MMBIR	RBM	RBM
ONG0400680	0	2	2	0	DSBR	c-NHEJ	c-NHEJ
ONG0100380	0	110	-344	-6	MMBIR	RBM	RBM
ONG0400780	0	1	0	1	DSBR	c-NHEJ	c-NHEJ
ONG0400800	0	14	4	1	MMBIR	RBM	RBM
ONG0100390	0	40	-24	-35	MMBIR	RBM	RBM
ONG0400830	0	1	-1	3	DSBR	c-NHEJ	c-NHEJ
ONG0400850	0	3	-166	0	DSBR	filler	c-NHEJ
ONG0400900	0	7	1	0	DSBR	c-NHEJ	c-NHEJ
ONG0400910	45	0	-17	0	MMBIR	RBM	RBM
ONG0100040	2	0	2	1	DSBR	c-NHEJ	c-NHEJ
ONG0500010	6	0	2	3	DSBR	c-NHEJ	c-NHEJ
ONG0500030	0	17	-47	2	MMBIR	RBM	RBM
ONG0500190	1	0	0	0	DSBR	c-NHEJ	c-NHEJ
ONG0500200	0	3	-70	-48	DSBR	filler	filler
ONG0500290	0	3	0	0	DSBR	c-NHEJ	c-NHEJ
ONG0100430	0	20	1	0	MMBIR	RBM	RBM
ONG0500480	0	12	0	-89	MMBIR	RBM	RBM
ONG0500570	0	2	2	-130	DSBR	c-NHEJ	filler
ONG0600010	7	0	7	0	DSBR	alt-EJ or template-switch	c-NHEJ
ONG0600030	0	3	-1	1	DSBR	c-NHEJ	c-NHEJ
ONG0600080	0	0	-46	1	DSBR	filler	c-NHEJ
ONG0600090	0	8	0	0	DSBR	c-NHEJ	c-NHEJ
ONG0600120	0	22	-2	2	MMBIR	RBM	RBM
ONG0600170	0	22	-3	-1	MMBIR	RBM	RBM
ONG0100500	0	81	-34	0	MMBIR	RBM	RBM
ONG0600380	0	409	1	2	MMBIR	RBM	RBM
ONG0600410	0	1	3	1	DSBR	c-NHEJ	c-NHEJ
ONG0600420	5	0	1	1	DSBR	c-NHEJ	c-NHEJ
ONG0600560	0	37	-5	-36	MMBIR	RBM	RBM
ONG0600580	0	1	-1	-22	DSBR	c-NHEJ	filler
ONG0600640	0	2	1	3	DSBR	c-NHEJ	c-NHEJ
ONG0600680	0	0	-80	1	DSBR	filler	c-NHEJ
ONG0600710	215	0	2	1	MMBIR	RBM	RBM
ONG0600720	7	0	3	1	DSBR	c-NHEJ	c-NHEJ
ONG0700060	0	14	5	5	MMBIR	RBM	RBM
ONG0700220	7	0	0	5	DSBR	c-NHEJ	alt-EJ or template-switch
ONG0700280	0	10	-8	-4	DSBR	filler	c-NHEJ
ONG0700360	0	24	-3	-1	MMBIR	RBM	RBM
ONG0700400	0	3	0	3	DSBR	c-NHEJ	c-NHEJ
ONG0100580	0	1	1	0	DSBR	c-NHEJ	c-NHEJ
ONG0700500	0	2	-1	1	DSBR	c-NHEJ	c-NHEJ
ONG0100590	2	0	2	2	DSBR	c-NHEJ	c-NHEJ
ONG0700560	0	29	-136	-19	MMBIR	RBM	RBM
ONG0700630	1	0	-1	0	DSBR	c-NHEJ	c-NHEJ
ONG0800060	0	12	0	1	MMBIR	RBM	RBM
ONG0800070	0	0	-6	-48	DSBR	filler	filler
ONG0800190	0	4	1	0	DSBR	c-NHEJ	c-NHEJ
ONG0800240	0	1	-82	0	DSBR	filler	c-NHEJ
ONG0800260	0	4	5	-2	DSBR	alt-EJ or template-switch	c-NHEJ
ONG0800290	0	7	0	-6	DSBR	c-NHEJ	filler
ONG0800400	0	5	1	0	DSBR	c-NHEJ	c-NHEJ
ONG0800470	0	3	0	10	DSBR	c-NHEJ	alt-EJ or template-switch
ONG0800630	5	0	5	4	DSBR	alt-EJ or template-switch	c-NHEJ
ONG0800660	0	2	-3	2	DSBR	c-NHEJ	c-NHEJ
ONG0900070	148	0	5	1	MMBIR	RBM	RBM
ONG0900250	0	36	0	7	MMBIR	RBM	RBM
ONG0900270	1	0	-3	-2	DSBR	c-NHEJ	c-NHEJ
ONG0900300	40	0	4	-20	MMBIR	RBM	RBM
ONG0900370	0	170	-176	-58	MMBIR	RBM	RBM
ONG0900420	0	291	-75	-12	MMBIR	RBM	RBM
ONG0900490	22	0	-39	-99	MMBIR	RBM	RBM
ONG0900520	1	0	0	1	DSBR	c-NHEJ	c-NHEJ
ONG0900530	0	9	-5	0	DSBR	c-NHEJ	c-NHEJ
ONG1000010	1	0	4	1	DSBR	c-NHEJ	c-NHEJ
ONG1000170	0	0	1	-1	DSBR	c-NHEJ	c-NHEJ
ONG0100760	1	0	1	4	DSBR	c-NHEJ	c-NHEJ
ONG1000350	6	0	-34	4	DSBR	filler	c-NHEJ
ONG0100770	0	4	-3	1	DSBR	c-NHEJ	c-NHEJ
ONG1000420	0	103	0	-119	MMBIR	RBM	RBM
ONG1000450	0	5	0	3	DSBR	c-NHEJ	c-NHEJ
ONG1000510	0	18	4	2	MMBIR	RBM	RBM
ONG1000530	52	0	-57	5	MMBIR	RBM	RBM
ONG1000560	245	0	2	-36	MMBIR	RBM	RBM
ONG1100030	0	1	0	3	DSBR	c-NHEJ	c-NHEJ
ONG1100060	1	0	0	4	DSBR	c-NHEJ	c-NHEJ
ONG1100090	0	14	0	0	MMBIR	RBM	RBM
ONG1100170	0	0	0	1	DSBR	c-NHEJ	c-NHEJ
ONG1100800	10	0	-22	-1	DSBR	filler	c-NHEJ
ONG0100830	0	1	-88	0	DSBR	filler	c-NHEJ
ONG1100500	26	0	6	0	MMBIR	RBM	RBM
ONG1100510	0	7	1	1	DSBR	c-NHEJ	c-NHEJ
ONG1100630	7	0	19	2	DSBR	alt-EJ or template-switch	c-NHEJ
ONG1100640	0	1	3	0	DSBR	c-NHEJ	c-NHEJ
ONG1100680	0	2	2	1	DSBR	c-NHEJ	c-NHEJ
ONG1100780	1	0	0	-1	DSBR	c-NHEJ	c-NHEJ
ONG1200060	0	1	2	0	DSBR	c-NHEJ	c-NHEJ
ONG1200080	0	1	-86	-34	DSBR	filler	filler
ONG1200100	6	0	-310	-271	DSBR	filler	filler
ONG1200120	0	257	1	-17	MMBIR	RBM	RBM
ONG0100880	2	0	1	-43	DSBR	c-NHEJ	filler
ONG1200160	0	12567	7	1	MMBIR	RBM	RBM
ONG1200240	0	4	0	0	DSBR	c-NHEJ	c-NHEJ
ONG1200260	0	75	-34	4	MMBIR	RBM	RBM
ONG1200320	0	13	-3	-30	MMBIR	RBM	RBM
ONG1200340	2	0	4	-2	DSBR	c-NHEJ	c-NHEJ
ONG1200370	0	5	0	-5	DSBR	c-NHEJ	c-NHEJ
ONG1200380	0	13	3	0	MMBIR	RBM	RBM
ONG1200400	4	0	3	0	DSBR	c-NHEJ	c-NHEJ
ONG1200560	3	0	2	8	DSBR	c-NHEJ	alt-EJ or template-switch
ONG1200640	0	1	1	1	DSBR	c-NHEJ	c-NHEJ
ONG1002280	8	0	1	4	DSBR	c-NHEJ	c-NHEJ
ONG0500630	6	0	-1	8	DSBR	c-NHEJ	alt-EJ or template-switch
ONG0500640	0	0	-21	0	DSBR	filler	c-NHEJ
ONG0800710	0	31	-13	3	MMBIR	RBM	RBM
ONG0600790	9	0	6	-1	DSBR	alt-EJ or template-switch	c-NHEJ
ONG0200910	4	0	0	1	DSBR	c-NHEJ	c-NHEJ
ONG1100840	4	0	0	0	DSBR	c-NHEJ	c-NHEJ
ONG0101260	0	1	-1	-1	DSBR	c-NHEJ	c-NHEJ
ONG0701380	13	0	-3	2	DSBR	c-NHEJ	c-NHEJ
ONG0201740	0	0	2	-34	DSBR	c-NHEJ	filler
ONG0201741	0	0	7	2	DSBR	alt-EJ or template-switch	c-NHEJ
